# Supplementary material for: Rational Primer and Probe Construction in PCR-Based Assays for the Efficient Diagnosis of Drifting Variants of SARS-CoV-2
Source: Adv Virol. 2022 May 13;2022:2965666. doi: 10.1155/2022/2965666 (PMC9122727; doi:10.1155/2022/2965666)
Supplement: Supplementary Materials — Supplementary 1: Multiple sequence alignment (MUSCLE) data/diagram of the entire N gene among analyzed 8 coronavirus sequences (NCBI GenBank IDs) by MEGA11 version 0.1 and is presented. Supplementary 2:: Original raw file downloaded from [15]. It contains all the records of mutations in SARS-CoV-2 genomes studied. Supplementary 3, 4, 5, 6, and 7: spreadsheet files for mutation analyses for NSP12ab, S, E, M, and N genes of SARS-CoV-2 genome, respectively, and are available on request. [file 2965666.f1.zip]

Archive with 7 entries (7 files):
- 2965666.f1/Supplementary 1 (1).doc
- 2965666.f1/Supplementery 2 (1).txt
- 2965666.f1/Supplementery 3 (1).txt
- 2965666.f1/Supplementery 4 (1).txt
- 2965666.f1/Supplementery 5 (1).txt
- 2965666.f1/Supplementery 6 (1).txt
- 2965666.f1/Supplementery 7 (1).txt
