# Supplementary material for: Rational Primer and Probe Construction in PCR-Based Assays for the Efficient Diagnosis of Drifting Variants of SARS-CoV-2
Source: Adv Virol. 2022 May 13;2022:2965666. doi: 10.1155/2022/2965666 (PMC9122727; doi:10.1155/2022/2965666)
Supplement: Supplementary Materials — Supplementary 1: Multiple sequence alignment (MUSCLE) data/diagram of the entire N gene among analyzed 8 coronavirus sequences (NCBI GenBank IDs) by MEGA11 version 0.1 and is presented. Supplementary 2:: Original raw file downloaded from [15]. It contains all the records of mutations in SARS-CoV-2 genomes studied. Supplementary 3, 4, 5, 6, and 7: spreadsheet files for mutation analyses for NSP12ab, S, E, M, and N genes of SARS-CoV-2 genome, respectively, and are available on request. [file 2965666.f1.zip › 2965666.f1/Supplementery 2 (1).txt]

sample	refpos	refvar	qvar	qpos	qlength	protein	variant	varclass	annotation	varname	varclade
EPI_ISL_415706	4	A	T	4	29903	5'UTR	4	extragenic		5'UTR:4	A4T
EPI_ISL_415706	241	C	T	241	29903	5'UTR	241	extragenic		5'UTR:241	C241T
EPI_ISL_415706	3037	C	T	3037	29903	NSP3	F106F	SNP_silent	Predicted phosphoesterase, papain-like proteinase	NSP3:F106F	C3037T
EPI_ISL_415706	14408	C	T	14408	29903	NSP12b	P314L	SNP	RNA-dependent RNA polymerase, post-ribosomal frameshift	NSP12b:P314L	C14408T
EPI_ISL_415706	15324	C	T	15324	29903	NSP12b	N619N	SNP_silent	RNA-dependent RNA polymerase, post-ribosomal frameshift	NSP12b:N619N	C15324T
EPI_ISL_415706	23403	A	G	23403	29903	S	D614G	SNP	Spike	S:D614G	A23403G
EPI_ISL_416497	4	A	T	4	29862	5'UTR	4	extragenic		5'UTR:4	A4T
EPI_ISL_416497	241	C	T	241	29862	5'UTR	241	extragenic		5'UTR:241	C241T
EPI_ISL_416497	2416	C	T	2416	29862	NSP2	Y537Y	SNP_silent	Non-Structural protein 2	NSP2:Y537Y	C2416T
EPI_ISL_416497	3037	C	T	3037	29862	NSP3	F106F	SNP_silent	Predicted phosphoesterase, papain-like proteinase	NSP3:F106F	C3037T
EPI_ISL_416497	12722	T	C	12722	29862	NSP9	S13P	SNP	ssRNA-binding protein	NSP9:S13P	T12722C
EPI_ISL_416497	14408	C	T	14408	29862	NSP12b	P314L	SNP	RNA-dependent RNA polymerase, post-ribosomal frameshift	NSP12b:P314L	C14408T
EPI_ISL_416497	23403	A	G	23403	29862	S	D614G	SNP	Spike	S:D614G	A23403G
EPI_ISL_416497	25563	G	T	25563	29862	ORF3a	Q57H	SNP	ORF3a protein	ORF3a:Q57H	G25563T
EPI_ISL_421670	4	A	G	4	29864	5'UTR	4	extragenic		5'UTR:4	A4G
EPI_ISL_421670	884	C	T	884	29864	NSP2	R27C	SNP	Non-Structural protein 2	NSP2:R27C	C884T
EPI_ISL_421670	1397	G	A	1397	29864	NSP2	V198I	SNP	Non-Structural protein 2	NSP2:V198I	G1397A
EPI_ISL_421670	6220	G	A	6220	29864	NSP3	L1167L	SNP_silent	Predicted phosphoesterase, papain-like proteinase	NSP3:L1167L	G6220A
EPI_ISL_421670	8653	G	T	8653	29864	NSP4	M33I	SNP	Transmembrane protein	NSP4:M33I	G8653T
EPI_ISL_421670	10667	T	C	10667	29864	NSP5	V204V	SNP_silent	3C-like proteinase	NSP5:V204V	T10667C
EPI_ISL_421670	11083	G	T	11083	29864	NSP6	L37F	SNP	Transmembrane protein	NSP6:L37F	G11083T
EPI_ISL_421670	22792	C	A	22792	29864	S	I410I	SNP_silent	Spike	S:I410I	C22792A
EPI_ISL_421670	28253	CA	AC	28253	29864	ORF8	FI120LL	SNP	ORF8 protein	ORF8:FI120LL	CA28253AC
EPI_ISL_421670	28688	T	C	28688	29864	N	A138A	SNP_silent	Nucleocapsid protein	N:A138A	T28688C
EPI_ISL_421670	28913	G	T	28913	29864	N	G214C	SNP	Nucleocapsid protein	N:G214C	G28913T
EPI_ISL_421670	29742	G	T	29742	29864	3'UTR	29742	extragenic		3'UTR:29742	G29742T
EPI_ISL_428489	4	A	T	4	29878	5'UTR	4	extragenic		5'UTR:4	A4T
EPI_ISL_428489	8299	C	T	8299	29878	NSP3	N1860N	SNP_silent	Predicted phosphoesterase, papain-like proteinase	NSP3:N1860N	C8299T
EPI_ISL_428489	28792	A	T	28792	29878	N	A173A	SNP_silent	Nucleocapsid protein	N:A173A	A28792T
EPI_ISL_430439	4	A	T	16	29898	5'UTR	4	extragenic		5'UTR:4	A4T
EPI_ISL_430439	11752	C	T	11764	29898	NSP6	L260L	SNP_silent	Transmembrane protein	NSP6:L260L	C11752T
EPI_ISL_430439	19170	C	A	19182	29898	NSP14	F377L	SNP	3'-to-5' exonuclease	NSP14:F377L	C19170A
EPI_ISL_451205	4	A	T	4	29840	5'UTR	4	extragenic		5'UTR:4	A4T
EPI_ISL_451205	241	C	T	241	29840	5'UTR	241	extragenic		5'UTR:241	C241T
EPI_ISL_451205	1059	C	T	1059	29840	NSP2	T85I	SNP	Non-Structural protein 2	NSP2:T85I	C1059T
EPI_ISL_451205	3037	C	T	3037	29840	NSP3	F106F	SNP_silent	Predicted phosphoesterase, papain-like proteinase	NSP3:F106F	C3037T
EPI_ISL_451205	14408	C	T	14408	29840	NSP12b	P314L	SNP	RNA-dependent RNA polymerase, post-ribosomal frameshift	NSP12b:P314L	C14408T
EPI_ISL_451205	23403	A	G	23403	29840	S	D614G	SNP	Spike	S:D614G	A23403G
EPI_ISL_451205	25563	G	T	25563	29840	ORF3a	Q57H	SNP	ORF3a protein	ORF3a:Q57H	G25563T
EPI_ISL_451205	27964	C	T	27964	29840	ORF8	S24L	SNP	ORF8 protein	ORF8:S24L	C27964T
EPI_ISL_435311	5	A	C	4	29861	5'UTR	5	extragenic		5'UTR:5	A5C
EPI_ISL_435311	241	C	T	240	29861	5'UTR	241	extragenic		5'UTR:241	C241T
EPI_ISL_435311	3037	C	T	3036	29861	NSP3	F106F	SNP_silent	Predicted phosphoesterase, papain-like proteinase	NSP3:F106F	C3037T
EPI_ISL_435311	6276	A	G	6275	29861	NSP3	K1186R	SNP	Predicted phosphoesterase, papain-like proteinase	NSP3:K1186R	A6276G
EPI_ISL_435311	14408	C	T	14407	29861	NSP12b	P314L	SNP	RNA-dependent RNA polymerase, post-ribosomal frameshift	NSP12b:P314L	C14408T
EPI_ISL_435311	23403	A	G	23402	29861	S	D614G	SNP	Spike	S:D614G	A23403G
EPI_ISL_435311	28881	GGG	AAC	28880	29861	N	RG203KR	SNP	Nucleocapsid protein	N:RG203KR	GGG28881AAC
EPI_ISL_445255	5	A	G	5	29831	5'UTR	5	extragenic		5'UTR:5	A5G
EPI_ISL_445255	7	G	C	7	29831	5'UTR	7	extragenic		5'UTR:7	G7C
EPI_ISL_445255	241	C	T	241	29831	5'UTR	241	extragenic		5'UTR:241	C241T
EPI_ISL_445255	3037	C	T	3037	29831	NSP3	F106F	SNP_silent	Predicted phosphoesterase, papain-like proteinase	NSP3:F106F	C3037T
EPI_ISL_445255	14408	C	T	14408	29831	NSP12b	P314L	SNP	RNA-dependent RNA polymerase, post-ribosomal frameshift	NSP12b:P314L	C14408T
EPI_ISL_445255	19170	C	T	19170	29831	NSP14	F377F	SNP_silent	3'-to-5' exonuclease	NSP14:F377F	C19170T
EPI_ISL_445255	19509	G	A	19509	29831	NSP14	E490E	SNP_silent	3'-to-5' exonuclease	NSP14:E490E	G19509A
EPI_ISL_445255	23403	A	G	23403	29831	S	D614G	SNP	Spike	S:D614G	A23403G
EPI_ISL_445255	28881	GGG	AAC	28881	29831	N	RG203KR	SNP	Nucleocapsid protein	N:RG203KR	GGG28881AAC
EPI_ISL_445255	29109	C	T	29109	29831	N	P279L	SNP	Nucleocapsid protein	N:P279L	C29109T
EPI_ISL_445273	5	.	T	5	29850	5'UTR	5	extragenic		5'UTR:5	.5T
EPI_ISL_445273	241	C	T	241	29850	5'UTR	241	extragenic		5'UTR:241	C241T
EPI_ISL_445273	3037	C	T	3037	29850	NSP3	F106F	SNP_silent	Predicted phosphoesterase, papain-like proteinase	NSP3:F106F	C3037T
EPI_ISL_445273	14408	C	T	14408	29850	NSP12b	P314L	SNP	RNA-dependent RNA polymerase, post-ribosomal frameshift	NSP12b:P314L	C14408T
EPI_ISL_445273	19973	C	T	19973	29850	NSP15	P118L	SNP	endoRNAse	NSP15:P118L	C19973T
EPI_ISL_445273	20268	A	G	20268	29850	NSP15	L216L	SNP_silent	endoRNAse	NSP15:L216L	A20268G
EPI_ISL_445273	23403	A	G	23403	29850	S	D614G	SNP	Spike	S:D614G	A23403G
EPI_ISL_445273	29734	G	C	29734	29850	3'UTR	29734	extragenic		3'UTR:29734	G29734C
EPI_ISL_445277	5	.	T	5	29843	5'UTR	5	extragenic		5'UTR:5	.5T
EPI_ISL_445277	241	C	T	241	29843	5'UTR	241	extragenic		5'UTR:241	C241T
EPI_ISL_445277	3037	C	T	3037	29843	NSP3	F106F	SNP_silent	Predicted phosphoesterase, papain-like proteinase	NSP3:F106F	C3037T
EPI_ISL_445277	10265	G	A	10265	29843	NSP5	G71S	SNP	3C-like proteinase	NSP5:G71S	G10265A
EPI_ISL_445277	14408	C	T	14408	29843	NSP12b	P314L	SNP	RNA-dependent RNA polymerase, post-ribosomal frameshift	NSP12b:P314L	C14408T
EPI_ISL_445277	23403	A	G	23403	29843	S	D614G	SNP	Spike	S:D614G	A23403G
EPI_ISL_445277	28881	GGG	AAC	28881	29843	N	RG203KR	SNP	Nucleocapsid protein	N:RG203KR	GGG28881AAC
EPI_ISL_445277	29398	G	T	29398	29843	N	K375N	SNP	Nucleocapsid protein	N:K375N	G29398T
EPI_ISL_445283	5	.	T	5	29851	5'UTR	5	extragenic		5'UTR:5	.5T
EPI_ISL_445283	241	C	T	241	29851	5'UTR	241	extragenic		5'UTR:241	C241T
EPI_ISL_445283	1059	C	T	1059	29851	NSP2	T85I	SNP	Non-Structural protein 2	NSP2:T85I	C1059T
EPI_ISL_445283	3037	C	T	3037	29851	NSP3	F106F	SNP_silent	Predicted phosphoesterase, papain-like proteinase	NSP3:F106F	C3037T
EPI_ISL_445283	14408	C	T	14408	29851	NSP12b	P314L	SNP	RNA-dependent RNA polymerase, post-ribosomal frameshift	NSP12b:P314L	C14408T
EPI_ISL_445283	23403	A	G	23403	29851	S	D614G	SNP	Spike	S:D614G	A23403G
EPI_ISL_445283	25563	G	T	25563	29851	ORF3a	Q57H	SNP	ORF3a protein	ORF3a:Q57H	G25563T
EPI_ISL_445287	5	.	T	5	29974	5'UTR	5	extragenic		5'UTR:5	.5T
EPI_ISL_445287	241	C	T	241	29974	5'UTR	241	extragenic		5'UTR:241	C241T
EPI_ISL_445287	3037	C	T	3037	29974	NSP3	F106F	SNP_silent	Predicted phosphoesterase, papain-like proteinase	NSP3:F106F	C3037T
EPI_ISL_445287	14408	C	T	14408	29974	NSP12b	P314L	SNP	RNA-dependent RNA polymerase, post-ribosomal frameshift	NSP12b:P314L	C14408T
EPI_ISL_445287	23403	A	G	23403	29974	S	D614G	SNP	Spike	S:D614G	A23403G
EPI_ISL_445287	29683	A	.	29682	29974	3'UTR	29683	extragenic		3'UTR:29683	A29683.
EPI_ISL_445290	5	.	T	5	29839	5'UTR	5	extragenic		5'UTR:5	.5T
EPI_ISL_445290	241	C	T	241	29839	5'UTR	241	extragenic		5'UTR:241	C241T
EPI_ISL_445290	1059	C	T	1059	29839	NSP2	T85I	SNP	Non-Structural protein 2	NSP2:T85I	C1059T
EPI_ISL_445290	3037	C	T	3037	29839	NSP3	F106F	SNP_silent	Predicted phosphoesterase, papain-like proteinase	NSP3:F106F	C3037T
EPI_ISL_445290	14408	C	T	14408	29839	NSP12b	P314L	SNP	RNA-dependent RNA polymerase, post-ribosomal frameshift	NSP12b:P314L	C14408T
EPI_ISL_445290	23403	A	G	23403	29839	S	D614G	SNP	Spike	S:D614G	A23403G
EPI_ISL_445290	25563	G	T	25563	29839	ORF3a	Q57H	SNP	ORF3a protein	ORF3a:Q57H	G25563T
EPI_ISL_445297	5	.	T	8	29854	5'UTR	5	extragenic		5'UTR:5	.5T
EPI_ISL_445297	241	C	T	244	29854	5'UTR	241	extragenic		5'UTR:241	C241T
EPI_ISL_445297	3037	C	T	3040	29854	NSP3	F106F	SNP_silent	Predicted phosphoesterase, papain-like proteinase	NSP3:F106F	C3037T
EPI_ISL_445297	8389	C	T	8392	29854	NSP3	N1890N	SNP_silent	Predicted phosphoesterase, papain-like proteinase	NSP3:N1890N	C8389T
EPI_ISL_445297	14408	C	T	14411	29854	NSP12b	P314L	SNP	RNA-dependent RNA polymerase, post-ribosomal frameshift	NSP12b:P314L	C14408T
EPI_ISL_445297	23403	A	G	23406	29854	S	D614G	SNP	Spike	S:D614G	A23403G
EPI_ISL_445297	25563	G	T	25566	29854	ORF3a	Q57H	SNP	ORF3a protein	ORF3a:Q57H	G25563T
EPI_ISL_445298	5	.	T	6	29857	5'UTR	5	extragenic		5'UTR:5	.5T
EPI_ISL_445298	241	C	T	242	29857	5'UTR	241	extragenic		5'UTR:241	C241T
EPI_ISL_445298	3037	C	T	3038	29857	NSP3	F106F	SNP_silent	Predicted phosphoesterase, papain-like proteinase	NSP3:F106F	C3037T
EPI_ISL_445298	10265	G	A	10266	29857	NSP5	G71S	SNP	3C-like proteinase	NSP5:G71S	G10265A
EPI_ISL_445298	14408	C	T	14409	29857	NSP12b	P314L	SNP	RNA-dependent RNA polymerase, post-ribosomal frameshift	NSP12b:P314L	C14408T
EPI_ISL_445298	23403	A	G	23404	29857	S	D614G	SNP	Spike	S:D614G	A23403G
EPI_ISL_445298	28881	GGG	AAC	28882	29857	N	RG203KR	SNP	Nucleocapsid protein	N:RG203KR	GGG28881AAC
EPI_ISL_445298	29398	G	T	29399	29857	N	K375N	SNP	Nucleocapsid protein	N:K375N	G29398T
EPI_ISL_445300	5	.	T	5	29862	5'UTR	5	extragenic		5'UTR:5	.5T
EPI_ISL_445300	241	C	T	241	29862	5'UTR	241	extragenic		5'UTR:241	C241T
EPI_ISL_445300	1606	T	C	1606	29862	NSP2	N267N	SNP_silent	Non-Structural protein 2	NSP2:N267N	T1606C
EPI_ISL_445300	3037	C	T	3037	29862	NSP3	F106F	SNP_silent	Predicted phosphoesterase, papain-like proteinase	NSP3:F106F	C3037T
EPI_ISL_445300	14408	C	T	14408	29862	NSP12b	P314L	SNP	RNA-dependent RNA polymerase, post-ribosomal frameshift	NSP12b:P314L	C14408T
EPI_ISL_445300	23403	A	G	23403	29862	S	D614G	SNP	Spike	S:D614G	A23403G
EPI_ISL_445300	28881	GGG	AAC	28881	29862	N	RG203KR	SNP	Nucleocapsid protein	N:RG203KR	GGG28881AAC
EPI_ISL_445301	5	.	T	15	29871	5'UTR	5	extragenic		5'UTR:5	.5T
EPI_ISL_445301	241	C	T	251	29871	5'UTR	241	extragenic		5'UTR:241	C241T
EPI_ISL_445301	3037	C	T	3047	29871	NSP3	F106F	SNP_silent	Predicted phosphoesterase, papain-like proteinase	NSP3:F106F	C3037T
EPI_ISL_445301	8389	C	T	8399	29871	NSP3	N1890N	SNP_silent	Predicted phosphoesterase, papain-like proteinase	NSP3:N1890N	C8389T
EPI_ISL_445301	14408	C	T	14418	29871	NSP12b	P314L	SNP	RNA-dependent RNA polymerase, post-ribosomal frameshift	NSP12b:P314L	C14408T
EPI_ISL_445301	23403	A	G	23413	29871	S	D614G	SNP	Spike	S:D614G	A23403G
EPI_ISL_445301	25563	G	T	25573	29871	ORF3a	Q57H	SNP	ORF3a protein	ORF3a:Q57H	G25563T
EPI_ISL_445302	5	.	T	5	29855	5'UTR	5	extragenic		5'UTR:5	.5T
EPI_ISL_445302	241	C	T	241	29855	5'UTR	241	extragenic		5'UTR:241	C241T
EPI_ISL_445302	3037	C	T	3037	29855	NSP3	F106F	SNP_silent	Predicted phosphoesterase, papain-like proteinase	NSP3:F106F	C3037T
EPI_ISL_445302	14408	C	T	14408	29855	NSP12b	P314L	SNP	RNA-dependent RNA polymerase, post-ribosomal frameshift	NSP12b:P314L	C14408T
EPI_ISL_445302	23403	A	G	23403	29855	S	D614G	SNP	Spike	S:D614G	A23403G
EPI_ISL_445302	28881	GGG	AAC	28881	29855	N	RG203KR	SNP	Nucleocapsid protein	N:RG203KR	GGG28881AAC
EPI_ISL_413653	6	A	T	6	29903	5'UTR	6	extragenic		5'UTR:6	A6T
EPI_ISL_413653	8782	C	T	8782	29903	NSP4	S76S	SNP_silent	Transmembrane protein	NSP4:S76S	C8782T
EPI_ISL_413653	17747	C	T	17747	29903	NSP13	P504L	SNP	Helicase	NSP13:P504L	C17747T
EPI_ISL_413653	17858	A	G	17858	29903	NSP13	Y541C	SNP	Helicase	NSP13:Y541C	A17858G
EPI_ISL_413653	18060	C	T	18060	29903	NSP14	L7L	SNP_silent	3'-to-5' exonuclease	NSP14:L7L	C18060T
EPI_ISL_413653	28144	T	C	28144	29903	ORF8	L84S	SNP	ORF8 protein	ORF8:L84S	T28144C
EPI_ISL_443266	6	A	G	6	29863	5'UTR	6	extragenic		5'UTR:6	A6G
EPI_ISL_443266	241	C	T	241	29863	5'UTR	241	extragenic		5'UTR:241	C241T
EPI_ISL_443266	1059	C	T	1059	29863	NSP2	T85I	SNP	Non-Structural protein 2	NSP2:T85I	C1059T
EPI_ISL_443266	3037	C	T	3037	29863	NSP3	F106F	SNP_silent	Predicted phosphoesterase, papain-like proteinase	NSP3:F106F	C3037T
EPI_ISL_443266	9891	C	T	9891	29863	NSP4	A446V	SNP	Transmembrane protein	NSP4:A446V	C9891T
EPI_ISL_443266	11083	G	T	11083	29863	NSP6	L37F	SNP	Transmembrane protein	NSP6:L37F	G11083T
EPI_ISL_443266	14408	C	T	14408	29863	NSP12b	P314L	SNP	RNA-dependent RNA polymerase, post-ribosomal frameshift	NSP12b:P314L	C14408T
EPI_ISL_443266	16469	C	T	16469	29863	NSP13	P78L	SNP	Helicase	NSP13:P78L	C16469T
EPI_ISL_443266	23403	A	G	23403	29863	S	D614G	SNP	Spike	S:D614G	A23403G
EPI_ISL_443266	25563	G	T	25563	29863	ORF3a	Q57H	SNP	ORF3a protein	ORF3a:Q57H	G25563T
EPI_ISL_455331	6	A	T	5	29845	5'UTR	6	extragenic		5'UTR:6	A6T
EPI_ISL_455331	8782	C	T	8781	29845	NSP4	S76S	SNP_silent	Transmembrane protein	NSP4:S76S	C8782T
EPI_ISL_455331	9477	T	A	9476	29845	NSP4	F308Y	SNP	Transmembrane protein	NSP4:F308Y	T9477A
EPI_ISL_455331	14805	C	T	14804	29845	NSP12b	Y446Y	SNP_silent	RNA-dependent RNA polymerase, post-ribosomal frameshift	NSP12b:Y446Y	C14805T
EPI_ISL_455331	25455	G	T	25454	29845	ORF3a	K21N	SNP	ORF3a protein	ORF3a:K21N	G25455T
EPI_ISL_455331	25537	G	T	25536	29845	ORF3a	G49C	SNP	ORF3a protein	ORF3a:G49C	G25537T
EPI_ISL_455331	25979	G	T	25978	29845	ORF3a	G196V	SNP	ORF3a protein	ORF3a:G196V	G25979T
EPI_ISL_455331	28144	T	C	28143	29845	ORF8	L84S	SNP	ORF8 protein	ORF8:L84S	T28144C
EPI_ISL_455331	28657	C	T	28656	29845	N	D128D	SNP_silent	Nucleocapsid protein	N:D128D	C28657T
EPI_ISL_455331	28863	C	T	28862	29845	N	S197L	SNP	Nucleocapsid protein	N:S197L	C28863T
EPI_ISL_474992	6	.	T	7	29904	5'UTR	6	extragenic		5'UTR:6	.6T
EPI_ISL_474992	241	C	T	242	29904	5'UTR	241	extragenic		5'UTR:241	C241T
EPI_ISL_474992	313	C	T	314	29904	NSP1	L16L	SNP_silent	Leader protein	NSP1:L16L	C313T
EPI_ISL_474992	3037	C	T	3038	29904	NSP3	F106F	SNP_silent	Predicted phosphoesterase, papain-like proteinase	NSP3:F106F	C3037T
EPI_ISL_474992	14408	C	T	14409	29904	NSP12b	P314L	SNP	RNA-dependent RNA polymerase, post-ribosomal frameshift	NSP12b:P314L	C14408T
EPI_ISL_474992	23403	A	G	23404	29904	S	D614G	SNP	Spike	S:D614G	A23403G
EPI_ISL_474992	24809	C	T	24810	29904	S	H1083Y	SNP	Spike	S:H1083Y	C24809T
EPI_ISL_474992	28079	G	T	28080	29904	ORF8	V62V	SNP_silent	ORF8 protein	ORF8:V62V	G28079T
EPI_ISL_474992	28881	GGG	AAC	28882	29904	N	RG203KR	SNP	Nucleocapsid protein	N:RG203KR	GGG28881AAC
EPI_ISL_474992	29751	G	C	29752	29904	3'UTR	29751	extragenic		3'UTR:29751	G29751C
EPI_ISL_424361	7	G	C	5	29868	5'UTR	7	extragenic		5'UTR:7	G7C
EPI_ISL_424361	884	C	T	882	29868	NSP2	R27C	SNP	Non-Structural protein 2	NSP2:R27C	C884T
EPI_ISL_424361	1397	G	A	1395	29868	NSP2	V198I	SNP	Non-Structural protein 2	NSP2:V198I	G1397A
EPI_ISL_424361	8653	G	T	8651	29868	NSP4	M33I	SNP	Transmembrane protein	NSP4:M33I	G8653T
EPI_ISL_424361	11083	G	T	11081	29868	NSP6	L37F	SNP	Transmembrane protein	NSP6:L37F	G11083T
EPI_ISL_424361	27613	G	T	27611	29868	ORF7a	V74F	SNP	ORF7a protein	ORF7a:V74F	G27613T
EPI_ISL_424361	28688	T	C	28686	29868	N	A138A	SNP_silent	Nucleocapsid protein	N:A138A	T28688C
EPI_ISL_424361	29296	C	T	29294	29868	N	D341D	SNP_silent	Nucleocapsid protein	N:D341D	C29296T
EPI_ISL_424361	29742	G	T	29740	29868	3'UTR	29742	extragenic		3'UTR:29742	G29742T
EPI_ISL_417201	8	G	A	4	29865	5'UTR	8	extragenic		5'UTR:8	G8A
EPI_ISL_417201	8782	C	T	8778	29865	NSP4	S76S	SNP_silent	Transmembrane protein	NSP4:S76S	C8782T
EPI_ISL_417201	16381	G	A	16377	29865	NSP13	V49I	SNP	Helicase	NSP13:V49I	G16381A
EPI_ISL_417201	17877	T	C	17873	29865	NSP13	T547T	SNP_silent	Helicase	NSP13:T547T	T17877C
EPI_ISL_417201	20316	C	T	20312	29865	NSP15	F232F	SNP_silent	endoRNAse	NSP15:F232F	C20316T
EPI_ISL_417201	25500	G	T	25496	29865	ORF3a	P36P	SNP_silent	ORF3a protein	ORF3a:P36P	G25500T
EPI_ISL_417201	26211	G	T	26207	29865	ORF3a	V273V	SNP_silent	ORF3a protein	ORF3a:V273V	G26211T
EPI_ISL_417201	28144	T	C	28140	29865	ORF8	L84S	SNP	ORF8 protein	ORF8:L84S	T28144C
EPI_ISL_417201	28878	G	A	28874	29865	N	S202N	SNP	Nucleocapsid protein	N:S202N	G28878A
EPI_ISL_417201	29742	G	A	29738	29865	3'UTR	29742	extragenic		3'UTR:29742	G29742A
EPI_ISL_443301	9	.	C	8	29872	5'UTR	9	extragenic		5'UTR:9	.9C
EPI_ISL_443301	11	.	A	11	29872	5'UTR	11	extragenic		5'UTR:11	.11A
EPI_ISL_443301	241	C	T	241	29872	5'UTR	241	extragenic		5'UTR:241	C241T
EPI_ISL_443301	3037	C	T	3037	29872	NSP3	F106F	SNP_silent	Predicted phosphoesterase, papain-like proteinase	NSP3:F106F	C3037T
EPI_ISL_443301	14408	C	T	14408	29872	NSP12b	P314L	SNP	RNA-dependent RNA polymerase, post-ribosomal frameshift	NSP12b:P314L	C14408T
EPI_ISL_443301	15324	C	T	15324	29872	NSP12b	N619N	SNP_silent	RNA-dependent RNA polymerase, post-ribosomal frameshift	NSP12b:N619N	C15324T
EPI_ISL_443301	20238	G	T	20238	29872	NSP15	R206S	SNP	endoRNAse	NSP15:R206S	G20238T
EPI_ISL_443301	23403	A	G	23403	29872	S	D614G	SNP	Spike	S:D614G	A23403G
EPI_ISL_416664	10	T	A	7	29897	5'UTR	10	extragenic		5'UTR:10	T10A
EPI_ISL_416664	8782	C	T	8779	29897	NSP4	S76S	SNP_silent	Transmembrane protein	NSP4:S76S	C8782T
EPI_ISL_416664	11704	C	T	11701	29897	NSP6	Y244Y	SNP_silent	Transmembrane protein	NSP6:Y244Y	C11704T
EPI_ISL_416664	17747	C	T	17744	29897	NSP13	P504L	SNP	Helicase	NSP13:P504L	C17747T
EPI_ISL_416664	17858	A	G	17855	29897	NSP13	Y541C	SNP	Helicase	NSP13:Y541C	A17858G
EPI_ISL_416664	18060	C	T	18057	29897	NSP14	L7L	SNP_silent	3'-to-5' exonuclease	NSP14:L7L	C18060T
EPI_ISL_416664	19961	C	T	19958	29897	NSP15	T114M	SNP	endoRNAse	NSP15:T114M	C19961T
EPI_ISL_416664	28144	T	C	28141	29897	ORF8	L84S	SNP	ORF8 protein	ORF8:L84S	T28144C
EPI_ISL_421641	10	T	G	6	29864	5'UTR	10	extragenic		5'UTR:10	T10G
EPI_ISL_421641	13	T	A	9	29864	5'UTR	13	extragenic		5'UTR:13	T13A
EPI_ISL_421641	33	C	A	29	29864	5'UTR	33	extragenic		5'UTR:33	C33A
EPI_ISL_421641	241	C	T	237	29864	5'UTR	241	extragenic		5'UTR:241	C241T
EPI_ISL_421641	3037	C	T	3033	29864	NSP3	F106F	SNP_silent	Predicted phosphoesterase, papain-like proteinase	NSP3:F106F	C3037T
EPI_ISL_421641	11272	G	T	11268	29864	NSP6	M100I	SNP	Transmembrane protein	NSP6:M100I	G11272T
EPI_ISL_421641	14408	C	T	14404	29864	NSP12b	P314L	SNP	RNA-dependent RNA polymerase, post-ribosomal frameshift	NSP12b:P314L	C14408T
EPI_ISL_421641	14585	C	T	14581	29864	NSP12b	A373V	SNP	RNA-dependent RNA polymerase, post-ribosomal frameshift	NSP12b:A373V	C14585T
EPI_ISL_421641	23403	A	G	23399	29864	S	D614G	SNP	Spike	S:D614G	A23403G
EPI_ISL_421641	29845	TT	GA	29841	29864	3'UTR	29845	extragenic		3'UTR:29845	TT29845GA
EPI_ISL_423473	10	T	C	10	29903	5'UTR	10	extragenic		5'UTR:10	T10C
EPI_ISL_423473	241	C	T	241	29903	5'UTR	241	extragenic		5'UTR:241	C241T
EPI_ISL_423473	3037	C	T	3037	29903	NSP3	F106F	SNP_silent	Predicted phosphoesterase, papain-like proteinase	NSP3:F106F	C3037T
EPI_ISL_423473	14408	C	T	14408	29903	NSP12b	P314L	SNP	RNA-dependent RNA polymerase, post-ribosomal frameshift	NSP12b:P314L	C14408T
EPI_ISL_423473	23403	A	G	23403	29903	S	D614G	SNP	Spike	S:D614G	A23403G
EPI_ISL_423473	27046	C	T	27046	29903	M	T175M	SNP	Membrane	M:T175M	C27046T
EPI_ISL_423473	28881	GGG	AAC	28881	29903	N	RG203KR	SNP	Nucleocapsid protein	N:RG203KR	GGG28881AAC
EPI_ISL_427230	10	T	A	10	29901	5'UTR	10	extragenic		5'UTR:10	T10A
EPI_ISL_427230	13	T	A	13	29901	5'UTR	13	extragenic		5'UTR:13	T13A
EPI_ISL_427230	241	C	T	241	29901	5'UTR	241	extragenic		5'UTR:241	C241T
EPI_ISL_427230	1059	C	T	1059	29901	NSP2	T85I	SNP	Non-Structural protein 2	NSP2:T85I	C1059T
EPI_ISL_427230	3037	C	T	3037	29901	NSP3	F106F	SNP_silent	Predicted phosphoesterase, papain-like proteinase	NSP3:F106F	C3037T
EPI_ISL_427230	14408	C	T	14408	29901	NSP12b	P314L	SNP	RNA-dependent RNA polymerase, post-ribosomal frameshift	NSP12b:P314L	C14408T
EPI_ISL_427230	21146	T	A	21146	29901	NSP16	L163H	SNP	2'-O-ribose methyltransferase	NSP16:L163H	T21146A
EPI_ISL_427230	23403	A	G	23403	29901	S	D614G	SNP	Spike	S:D614G	A23403G
EPI_ISL_427230	24904	C	T	24904	29901	S	I1114I	SNP_silent	Spike	S:I1114I	C24904T
EPI_ISL_427230	25563	G	T	25563	29901	ORF3a	Q57H	SNP	ORF3a protein	ORF3a:Q57H	G25563T
EPI_ISL_427230	29553	G	A	29553	29901	3'UTR	29553	extragenic		3'UTR:29553	G29553A
EPI_ISL_428355	10	T	A	10	29869	5'UTR	10	extragenic		5'UTR:10	T10A
EPI_ISL_428355	241	C	T	241	29869	5'UTR	241	extragenic		5'UTR:241	C241T
EPI_ISL_428355	1059	C	T	1059	29869	NSP2	T85I	SNP	Non-Structural protein 2	NSP2:T85I	C1059T
EPI_ISL_428355	3037	C	T	3037	29869	NSP3	F106F	SNP_silent	Predicted phosphoesterase, papain-like proteinase	NSP3:F106F	C3037T
EPI_ISL_428355	6175	T	C	6175	29869	NSP3	I1152I	SNP_silent	Predicted phosphoesterase, papain-like proteinase	NSP3:I1152I	T6175C
EPI_ISL_428355	10582	C	T	10582	29869	NSP5	D176D	SNP_silent	3C-like proteinase	NSP5:D176D	C10582T
EPI_ISL_428355	14408	C	T	14408	29869	NSP12b	P314L	SNP	RNA-dependent RNA polymerase, post-ribosomal frameshift	NSP12b:P314L	C14408T
EPI_ISL_428355	23403	A	G	23403	29869	S	D614G	SNP	Spike	S:D614G	A23403G
EPI_ISL_428355	23707	C	T	23707	29869	S	P715P	SNP_silent	Spike	S:P715P	C23707T
EPI_ISL_428355	25563	G	T	25563	29869	ORF3a	Q57H	SNP	ORF3a protein	ORF3a:Q57H	G25563T
EPI_ISL_428881	10	T	G	10	29903	5'UTR	10	extragenic		5'UTR:10	T10G
EPI_ISL_428881	241	C	T	241	29903	5'UTR	241	extragenic		5'UTR:241	C241T
EPI_ISL_428881	3037	C	T	3037	29903	NSP3	F106F	SNP_silent	Predicted phosphoesterase, papain-like proteinase	NSP3:F106F	C3037T
EPI_ISL_428881	4002	C	T	4002	29903	NSP3	T428I	SNP	Predicted phosphoesterase, papain-like proteinase	NSP3:T428I	C4002T
EPI_ISL_428881	10097	G	A	10097	29903	NSP5	G15S	SNP	3C-like proteinase	NSP5:G15S	G10097A
EPI_ISL_428881	11083	G	T	11083	29903	NSP6	L37F	SNP	Transmembrane protein	NSP6:L37F	G11083T
EPI_ISL_428881	13536	C	T	13536	29903	NSP12b	Y23Y	SNP_silent	RNA-dependent RNA polymerase, post-ribosomal frameshift	NSP12b:Y23Y	C13536T
EPI_ISL_428881	14408	C	T	14408	29903	NSP12b	P314L	SNP	RNA-dependent RNA polymerase, post-ribosomal frameshift	NSP12b:P314L	C14408T
EPI_ISL_428881	23403	A	G	23403	29903	S	D614G	SNP	Spike	S:D614G	A23403G
EPI_ISL_428881	23731	C	T	23731	29903	S	T723T	SNP_silent	Spike	S:T723T	C23731T
EPI_ISL_428881	28881	GGG	AAC	28881	29903	N	RG203KR	SNP	Nucleocapsid protein	N:RG203KR	GGG28881AAC
EPI_ISL_437528	10	T	A	10	29903	5'UTR	10	extragenic		5'UTR:10	T10A
EPI_ISL_437528	241	C	T	241	29903	5'UTR	241	extragenic		5'UTR:241	C241T
EPI_ISL_437528	1954	G	T	1954	29903	NSP2	Q383H	SNP	Non-Structural protein 2	NSP2:Q383H	G1954T
EPI_ISL_437528	3037	C	T	3037	29903	NSP3	F106F	SNP_silent	Predicted phosphoesterase, papain-like proteinase	NSP3:F106F	C3037T
EPI_ISL_437528	14408	C	T	14408	29903	NSP12b	P314L	SNP	RNA-dependent RNA polymerase, post-ribosomal frameshift	NSP12b:P314L	C14408T
EPI_ISL_437528	16813	G	A	16813	29903	NSP13	V193I	SNP	Helicase	NSP13:V193I	G16813A
EPI_ISL_437528	19172	C	T	19172	29903	NSP14	T378I	SNP	3'-to-5' exonuclease	NSP14:T378I	C19172T
EPI_ISL_437528	23403	A	G	23403	29903	S	D614G	SNP	Spike	S:D614G	A23403G
EPI_ISL_437528	28881	GGG	AAC	28881	29903	N	RG203KR	SNP	Nucleocapsid protein	N:RG203KR	GGG28881AAC
EPI_ISL_437810	10	T	A	8	29901	5'UTR	10	extragenic		5'UTR:10	T10A
EPI_ISL_437810	8782	C	T	8780	29901	NSP4	S76S	SNP_silent	Transmembrane protein	NSP4:S76S	C8782T
EPI_ISL_437810	17747	C	T	17745	29901	NSP13	P504L	SNP	Helicase	NSP13:P504L	C17747T
EPI_ISL_437810	17858	A	G	17856	29901	NSP13	Y541C	SNP	Helicase	NSP13:Y541C	A17858G
EPI_ISL_437810	18060	C	T	18058	29901	NSP14	L7L	SNP_silent	3'-to-5' exonuclease	NSP14:L7L	C18060T
EPI_ISL_437810	28144	T	C	28142	29901	ORF8	L84S	SNP	ORF8 protein	ORF8:L84S	T28144C
EPI_ISL_437810	28514	G	T	28512	29901	N	D81Y	SNP	Nucleocapsid protein	N:D81Y	G28514T
EPI_ISL_437821	10	T	G	10	29903	5'UTR	10	extragenic		5'UTR:10	T10G
EPI_ISL_437821	13	T	A	13	29903	5'UTR	13	extragenic		5'UTR:13	T13A
EPI_ISL_437821	241	C	T	241	29903	5'UTR	241	extragenic		5'UTR:241	C241T
EPI_ISL_437821	1059	C	T	1059	29903	NSP2	T85I	SNP	Non-Structural protein 2	NSP2:T85I	C1059T
EPI_ISL_437821	3037	C	T	3037	29903	NSP3	F106F	SNP_silent	Predicted phosphoesterase, papain-like proteinase	NSP3:F106F	C3037T
EPI_ISL_437821	14408	C	T	14408	29903	NSP12b	P314L	SNP	RNA-dependent RNA polymerase, post-ribosomal frameshift	NSP12b:P314L	C14408T
EPI_ISL_437821	23403	A	G	23403	29903	S	D614G	SNP	Spike	S:D614G	A23403G
EPI_ISL_437821	25563	G	T	25563	29903	ORF3a	Q57H	SNP	ORF3a protein	ORF3a:Q57H	G25563T
EPI_ISL_443184	10	T	A	4	29915	5'UTR	10	extragenic		5'UTR:10	T10A
EPI_ISL_443184	13	T	A	7	29915	5'UTR	13	extragenic		5'UTR:13	T13A
EPI_ISL_443184	31	A	T	25	29915	5'UTR	31	extragenic		5'UTR:31	A31T
EPI_ISL_443184	34	AAC	TTT	28	29915	5'UTR	34	extragenic		5'UTR:34	AAC34TTT
EPI_ISL_443184	241	C	T	235	29915	5'UTR	241	extragenic		5'UTR:241	C241T
EPI_ISL_443184	1059	C	T	1053	29915	NSP2	T85I	SNP	Non-Structural protein 2	NSP2:T85I	C1059T
EPI_ISL_443184	3037	C	T	3031	29915	NSP3	F106F	SNP_silent	Predicted phosphoesterase, papain-like proteinase	NSP3:F106F	C3037T
EPI_ISL_443184	12880	C	T	12874	29915	NSP9	I65I	SNP_silent	ssRNA-binding protein	NSP9:I65I	C12880T
EPI_ISL_443184	14408	C	T	14402	29915	NSP12b	P314L	SNP	RNA-dependent RNA polymerase, post-ribosomal frameshift	NSP12b:P314L	C14408T
EPI_ISL_443184	23403	A	G	23397	29915	S	D614G	SNP	Spike	S:D614G	A23403G
EPI_ISL_443184	25563	G	T	25557	29915	ORF3a	Q57H	SNP	ORF3a protein	ORF3a:Q57H	G25563T
EPI_ISL_443184	29553	G	A	29547	29915	3'UTR	29553	extragenic		3'UTR:29553	G29553A
EPI_ISL_443184	29706	G	T	29700	29915	3'UTR	29706	extragenic		3'UTR:29706	G29706T
EPI_ISL_443184	29862	G	A	29856	29915	3'UTR	29862	extragenic		3'UTR:29862	G29862A
EPI_ISL_443184	29864	G	A	29858	29915	3'UTR	29864	extragenic		3'UTR:29864	G29864A
EPI_ISL_443184	29867	TG	AA	29861	29915	3'UTR	29867	extragenic		3'UTR:29867	TG29867AA
EPI_ISL_443184	29870	C	A	29864	29915	3'UTR	29870	extragenic		3'UTR:29870	C29870A
EPI_ISL_443258	10	T	A	10	29868	5'UTR	10	extragenic		5'UTR:10	T10A
EPI_ISL_443258	241	C	T	241	29868	5'UTR	241	extragenic		5'UTR:241	C241T
EPI_ISL_443258	2416	C	T	2416	29868	NSP2	Y537Y	SNP_silent	Non-Structural protein 2	NSP2:Y537Y	C2416T
EPI_ISL_443258	3037	C	T	3037	29868	NSP3	F106F	SNP_silent	Predicted phosphoesterase, papain-like proteinase	NSP3:F106F	C3037T
EPI_ISL_443258	10969	C	T	10969	29868	NSP5	F305F	SNP_silent	3C-like proteinase	NSP5:F305F	C10969T
EPI_ISL_443258	11083	G	T	11083	29868	NSP6	L37F	SNP	Transmembrane protein	NSP6:L37F	G11083T
EPI_ISL_443258	14408	C	T	14408	29868	NSP12b	P314L	SNP	RNA-dependent RNA polymerase, post-ribosomal frameshift	NSP12b:P314L	C14408T
EPI_ISL_443258	23403	A	G	23403	29868	S	D614G	SNP	Spike	S:D614G	A23403G
EPI_ISL_443258	25563	G	T	25563	29868	ORF3a	Q57H	SNP	ORF3a protein	ORF3a:Q57H	G25563T
EPI_ISL_444465	10	T	G	10	29903	5'UTR	10	extragenic		5'UTR:10	T10G
EPI_ISL_444465	241	C	T	241	29903	5'UTR	241	extragenic		5'UTR:241	C241T
EPI_ISL_444465	2836	C	T	2836	29903	NSP3	C39C	SNP_silent	Predicted phosphoesterase, papain-like proteinase	NSP3:C39C	C2836T
EPI_ISL_444465	3037	C	T	3037	29903	NSP3	F106F	SNP_silent	Predicted phosphoesterase, papain-like proteinase	NSP3:F106F	C3037T
EPI_ISL_444465	14408	C	T	14408	29903	NSP12b	P314L	SNP	RNA-dependent RNA polymerase, post-ribosomal frameshift	NSP12b:P314L	C14408T
EPI_ISL_444465	18877	C	T	18877	29903	NSP14	C279C	SNP_silent	3'-to-5' exonuclease	NSP14:C279C	C18877T
EPI_ISL_444465	22444	C	T	22444	29903	S	D294D	SNP_silent	Spike	S:D294D	C22444T
EPI_ISL_444465	23277	C	T	23277	29903	S	T572I	SNP	Spike	S:T572I	C23277T
EPI_ISL_444465	23403	A	G	23403	29903	S	D614G	SNP	Spike	S:D614G	A23403G
EPI_ISL_444465	25563	G	T	25563	29903	ORF3a	Q57H	SNP	ORF3a protein	ORF3a:Q57H	G25563T
EPI_ISL_444465	26735	C	T	26735	29903	M	Y71Y	SNP_silent	Membrane	M:Y71Y	C26735T
EPI_ISL_444465	28854	C	T	28854	29903	N	S194L	SNP	Nucleocapsid protein	N:S194L	C28854T
EPI_ISL_451232	10	T	G	10	29840	5'UTR	10	extragenic		5'UTR:10	T10G
EPI_ISL_451232	13	T	A	13	29840	5'UTR	13	extragenic		5'UTR:13	T13A
EPI_ISL_451232	241	C	T	241	29840	5'UTR	241	extragenic		5'UTR:241	C241T
EPI_ISL_451232	1059	C	T	1059	29840	NSP2	T85I	SNP	Non-Structural protein 2	NSP2:T85I	C1059T
EPI_ISL_451232	1943	C	T	1943	29840	NSP2	R380C	SNP	Non-Structural protein 2	NSP2:R380C	C1943T
EPI_ISL_451232	3037	C	T	3037	29840	NSP3	F106F	SNP_silent	Predicted phosphoesterase, papain-like proteinase	NSP3:F106F	C3037T
EPI_ISL_451232	6226	T	C	6226	29840	NSP3	H1169H	SNP_silent	Predicted phosphoesterase, papain-like proteinase	NSP3:H1169H	T6226C
EPI_ISL_451232	10537	C	T	10537	29840	NSP5	Y161Y	SNP_silent	3C-like proteinase	NSP5:Y161Y	C10537T
EPI_ISL_451232	14408	C	T	14408	29840	NSP12b	P314L	SNP	RNA-dependent RNA polymerase, post-ribosomal frameshift	NSP12b:P314L	C14408T
EPI_ISL_451232	21911	C	T	21911	29840	S	S116S	SNP_silent	Spike	S:S116S	C21911T
EPI_ISL_451232	23403	A	G	23403	29840	S	D614G	SNP	Spike	S:D614G	A23403G
EPI_ISL_451232	25563	G	T	25563	29840	ORF3a	Q57H	SNP	ORF3a protein	ORF3a:Q57H	G25563T
EPI_ISL_451232	27964	C	T	27964	29840	ORF8	S24L	SNP	ORF8 protein	ORF8:S24L	C27964T
EPI_ISL_451981	10	T	A	10	29903	5'UTR	10	extragenic		5'UTR:10	T10A
EPI_ISL_451981	13	T	A	13	29903	5'UTR	13	extragenic		5'UTR:13	T13A
EPI_ISL_451981	19	C	T	19	29903	5'UTR	19	extragenic		5'UTR:19	C19T
EPI_ISL_451981	106	C	T	106	29903	5'UTR	106	extragenic		5'UTR:106	C106T
EPI_ISL_451981	241	C	T	241	29903	5'UTR	241	extragenic		5'UTR:241	C241T
EPI_ISL_451981	3037	C	T	3037	29903	NSP3	F106F	SNP_silent	Predicted phosphoesterase, papain-like proteinase	NSP3:F106F	C3037T
EPI_ISL_451981	8072	A	G	8072	29903	NSP3	N1785D	SNP	Predicted phosphoesterase, papain-like proteinase	NSP3:N1785D	A8072G
EPI_ISL_451981	14408	C	T	14408	29903	NSP12b	P314L	SNP	RNA-dependent RNA polymerase, post-ribosomal frameshift	NSP12b:P314L	C14408T
EPI_ISL_451981	23403	A	G	23403	29903	S	D614G	SNP	Spike	S:D614G	A23403G
EPI_ISL_451981	28881	GGG	AAC	28881	29903	N	RG203KR	SNP	Nucleocapsid protein	N:RG203KR	GGG28881AAC
EPI_ISL_437809	11	TA	GT	11	29921	5'UTR	11	extragenic		5'UTR:11	TA11GT
EPI_ISL_437809	18	TC	GG	18	29921	5'UTR	18	extragenic		5'UTR:18	TC18GG
EPI_ISL_437809	28	C	T	28	29921	5'UTR	28	extragenic		5'UTR:28	C28T
EPI_ISL_437809	8782	C	T	8782	29921	NSP4	S76S	SNP_silent	Transmembrane protein	NSP4:S76S	C8782T
EPI_ISL_437809	9166	C	T	9166	29921	NSP4	T204T	SNP_silent	Transmembrane protein	NSP4:T204T	C9166T
EPI_ISL_437809	14882	A	G	14882	29921	NSP12b	D472G	SNP	RNA-dependent RNA polymerase, post-ribosomal frameshift	NSP12b:D472G	A14882G
EPI_ISL_437809	17747	C	T	17747	29921	NSP13	P504L	SNP	Helicase	NSP13:P504L	C17747T
EPI_ISL_437809	17858	A	G	17858	29921	NSP13	Y541C	SNP	Helicase	NSP13:Y541C	A17858G
EPI_ISL_437809	18060	C	T	18060	29921	NSP14	L7L	SNP_silent	3'-to-5' exonuclease	NSP14:L7L	C18060T
EPI_ISL_437809	28144	T	C	28144	29921	ORF8	L84S	SNP	ORF8 protein	ORF8:L84S	T28144C
EPI_ISL_437811	11	TA	GT	10	29902	5'UTR	11	extragenic		5'UTR:11	TA11GT
EPI_ISL_437811	18	T	G	17	29902	5'UTR	18	extragenic		5'UTR:18	T18G
EPI_ISL_437811	241	C	T	240	29902	5'UTR	241	extragenic		5'UTR:241	C241T
EPI_ISL_437811	1059	C	T	1058	29902	NSP2	T85I	SNP	Non-Structural protein 2	NSP2:T85I	C1059T
EPI_ISL_437811	3037	C	T	3036	29902	NSP3	F106F	SNP_silent	Predicted phosphoesterase, papain-like proteinase	NSP3:F106F	C3037T
EPI_ISL_437811	14408	C	T	14407	29902	NSP12b	P314L	SNP	RNA-dependent RNA polymerase, post-ribosomal frameshift	NSP12b:P314L	C14408T
EPI_ISL_437811	23403	A	G	23402	29902	S	D614G	SNP	Spike	S:D614G	A23403G
EPI_ISL_437811	25563	G	T	25562	29902	ORF3a	Q57H	SNP	ORF3a protein	ORF3a:Q57H	G25563T
EPI_ISL_448654	11	T	C	11	29903	5'UTR	11	extragenic		5'UTR:11	T11C
EPI_ISL_448654	241	C	T	241	29903	5'UTR	241	extragenic		5'UTR:241	C241T
EPI_ISL_448654	3037	C	T	3037	29903	NSP3	F106F	SNP_silent	Predicted phosphoesterase, papain-like proteinase	NSP3:F106F	C3037T
EPI_ISL_448654	14408	C	T	14408	29903	NSP12b	P314L	SNP	RNA-dependent RNA polymerase, post-ribosomal frameshift	NSP12b:P314L	C14408T
EPI_ISL_448654	23403	A	G	23403	29903	S	D614G	SNP	Spike	S:D614G	A23403G
EPI_ISL_448654	28881	GGG	AAC	28881	29903	N	RG203KR	SNP	Nucleocapsid protein	N:RG203KR	GGG28881AAC
EPI_ISL_464522	11	T	C	11	29903	5'UTR	11	extragenic		5'UTR:11	T11C
EPI_ISL_464522	241	C	T	241	29903	5'UTR	241	extragenic		5'UTR:241	C241T
EPI_ISL_464522	3037	C	T	3037	29903	NSP3	F106F	SNP_silent	Predicted phosphoesterase, papain-like proteinase	NSP3:F106F	C3037T
EPI_ISL_464522	14408	C	T	14408	29903	NSP12b	P314L	SNP	RNA-dependent RNA polymerase, post-ribosomal frameshift	NSP12b:P314L	C14408T
EPI_ISL_464522	23403	A	G	23403	29903	S	D614G	SNP	Spike	S:D614G	A23403G
EPI_ISL_465528	11	T	C	11	29903	5'UTR	11	extragenic		5'UTR:11	T11C
EPI_ISL_465528	241	C	T	241	29903	5'UTR	241	extragenic		5'UTR:241	C241T
EPI_ISL_465528	842	C	T	842	29903	NSP2	P13S	SNP	Non-Structural protein 2	NSP2:P13S	C842T
EPI_ISL_465528	3037	C	T	3037	29903	NSP3	F106F	SNP_silent	Predicted phosphoesterase, papain-like proteinase	NSP3:F106F	C3037T
EPI_ISL_465528	14408	C	T	14408	29903	NSP12b	P314L	SNP	RNA-dependent RNA polymerase, post-ribosomal frameshift	NSP12b:P314L	C14408T
EPI_ISL_465528	17999	C	T	17999	29903	NSP13	T588I	SNP	Helicase	NSP13:T588I	C17999T
EPI_ISL_465528	23403	A	G	23403	29903	S	D614G	SNP	Spike	S:D614G	A23403G
EPI_ISL_465528	27881	C	T	27881	29903	ORF7b	H42H	SNP_silent	ORF7b protein	ORF7b:H42H	C27881T
EPI_ISL_465528	28881	GGG	AAC	28881	29903	N	RG203KR	SNP	Nucleocapsid protein	N:RG203KR	GGG28881AAC
EPI_ISL_465528	29706	G	T	29706	29903	3'UTR	29706	extragenic		3'UTR:29706	G29706T
EPI_ISL_437370	12	A	G	6	29855	5'UTR	12	extragenic		5'UTR:12	A12G
EPI_ISL_437370	241	C	T	235	29855	5'UTR	241	extragenic		5'UTR:241	C241T
EPI_ISL_437370	1059	C	T	1053	29855	NSP2	T85I	SNP	Non-Structural protein 2	NSP2:T85I	C1059T
EPI_ISL_437370	3037	C	T	3031	29855	NSP3	F106F	SNP_silent	Predicted phosphoesterase, papain-like proteinase	NSP3:F106F	C3037T
EPI_ISL_437370	14408	C	T	14402	29855	NSP12b	P314L	SNP	RNA-dependent RNA polymerase, post-ribosomal frameshift	NSP12b:P314L	C14408T
EPI_ISL_437370	23403	A	G	23397	29855	S	D614G	SNP	Spike	S:D614G	A23403G
EPI_ISL_437370	25563	G	T	25557	29855	ORF3a	Q57H	SNP	ORF3a protein	ORF3a:Q57H	G25563T
EPI_ISL_437370	29449	G	T	29443	29855	N	V392V	SNP_silent	Nucleocapsid protein	N:V392V	G29449T
EPI_ISL_437805	12	A	T	12	29903	5'UTR	12	extragenic		5'UTR:12	A12T
EPI_ISL_437805	18	TCCC	GGGA	18	29903	5'UTR	18	extragenic		5'UTR:18	TCCC18GGGA
EPI_ISL_437805	5170	C	T	5170	29903	NSP3	Y817Y	SNP_silent	Predicted phosphoesterase, papain-like proteinase	NSP3:Y817Y	C5170T
EPI_ISL_437805	8782	C	T	8782	29903	NSP4	S76S	SNP_silent	Transmembrane protein	NSP4:S76S	C8782T
EPI_ISL_437805	16468	C	T	16468	29903	NSP13	P78S	SNP	Helicase	NSP13:P78S	C16468T
EPI_ISL_437805	17004	C	T	17004	29903	NSP13	L256L	SNP_silent	Helicase	NSP13:L256L	C17004T
EPI_ISL_437805	17673	T	C	17673	29903	NSP13	V479V	SNP_silent	Helicase	NSP13:V479V	T17673C
EPI_ISL_437805	17747	C	T	17747	29903	NSP13	P504L	SNP	Helicase	NSP13:P504L	C17747T
EPI_ISL_437805	17858	A	G	17858	29903	NSP13	Y541C	SNP	Helicase	NSP13:Y541C	A17858G
EPI_ISL_437805	18060	C	T	18060	29903	NSP14	L7L	SNP_silent	3'-to-5' exonuclease	NSP14:L7L	C18060T
EPI_ISL_437805	28144	T	C	28144	29903	ORF8	L84S	SNP	ORF8 protein	ORF8:L84S	T28144C
EPI_ISL_437824	12	A	T	12	29919	5'UTR	12	extragenic		5'UTR:12	A12T
EPI_ISL_437824	18	T	G	18	29919	5'UTR	18	extragenic		5'UTR:18	T18G
EPI_ISL_437824	8782	C	T	8782	29919	NSP4	S76S	SNP_silent	Transmembrane protein	NSP4:S76S	C8782T
EPI_ISL_437824	17747	C	T	17747	29919	NSP13	P504L	SNP	Helicase	NSP13:P504L	C17747T
EPI_ISL_437824	17858	A	G	17858	29919	NSP13	Y541C	SNP	Helicase	NSP13:Y541C	A17858G
EPI_ISL_437824	18060	C	T	18060	29919	NSP14	L7L	SNP_silent	3'-to-5' exonuclease	NSP14:L7L	C18060T
EPI_ISL_437824	28144	T	C	28144	29919	ORF8	L84S	SNP	ORF8 protein	ORF8:L84S	T28144C
EPI_ISL_437829	12	A	T	6	29913	5'UTR	12	extragenic		5'UTR:12	A12T
EPI_ISL_437829	8782	C	T	8776	29913	NSP4	S76S	SNP_silent	Transmembrane protein	NSP4:S76S	C8782T
EPI_ISL_437829	17747	C	T	17741	29913	NSP13	P504L	SNP	Helicase	NSP13:P504L	C17747T
EPI_ISL_437829	17858	A	G	17852	29913	NSP13	Y541C	SNP	Helicase	NSP13:Y541C	A17858G
EPI_ISL_437829	18060	C	T	18054	29913	NSP14	L7L	SNP_silent	3'-to-5' exonuclease	NSP14:L7L	C18060T
EPI_ISL_437829	28144	T	C	28138	29913	ORF8	L84S	SNP	ORF8 protein	ORF8:L84S	T28144C
EPI_ISL_452352	12	A	C	12	29903	5'UTR	12	extragenic		5'UTR:12	A12C
EPI_ISL_452352	241	C	T	241	29903	5'UTR	241	extragenic		5'UTR:241	C241T
EPI_ISL_452352	3037	C	T	3037	29903	NSP3	F106F	SNP_silent	Predicted phosphoesterase, papain-like proteinase	NSP3:F106F	C3037T
EPI_ISL_452352	6552	T	G	6552	29903	NSP3	M1278R	SNP	Predicted phosphoesterase, papain-like proteinase	NSP3:M1278R	T6552G
EPI_ISL_452352	14408	C	T	14408	29903	NSP12b	P314L	SNP	RNA-dependent RNA polymerase, post-ribosomal frameshift	NSP12b:P314L	C14408T
EPI_ISL_452352	18568	C	T	18568	29903	NSP14	L177F	SNP	3'-to-5' exonuclease	NSP14:L177F	C18568T
EPI_ISL_452352	23118	A	C	23118	29903	S	H519P	SNP	Spike	S:H519P	A23118C
EPI_ISL_452352	23403	A	G	23403	29903	S	D614G	SNP	Spike	S:D614G	A23403G
EPI_ISL_458146	12	A	G	12	29903	5'UTR	12	extragenic		5'UTR:12	A12G
EPI_ISL_458146	241	C	T	241	29903	5'UTR	241	extragenic		5'UTR:241	C241T
EPI_ISL_458146	3037	C	T	3037	29903	NSP3	F106F	SNP_silent	Predicted phosphoesterase, papain-like proteinase	NSP3:F106F	C3037T
EPI_ISL_458146	6319	A	G	6319	29903	NSP3	P1200P	SNP_silent	Predicted phosphoesterase, papain-like proteinase	NSP3:P1200P	A6319G
EPI_ISL_458146	14408	C	T	14408	29903	NSP12b	P314L	SNP	RNA-dependent RNA polymerase, post-ribosomal frameshift	NSP12b:P314L	C14408T
EPI_ISL_458146	23403	A	G	23403	29903	S	D614G	SNP	Spike	S:D614G	A23403G
EPI_ISL_458146	25088	G	T	25088	29903	S	V1176F	SNP	Spike	S:V1176F	G25088T
EPI_ISL_458146	26149	T	C	26149	29903	ORF3a	S253P	SNP	ORF3a protein	ORF3a:S253P	T26149C
EPI_ISL_458146	28881	GGG	AAC	28881	29903	N	RG203KR	SNP	Nucleocapsid protein	N:RG203KR	GGG28881AAC
EPI_ISL_414627	13	T	A	7	29897	5'UTR	13	extragenic		5'UTR:13	T13A
EPI_ISL_414627	45	G	C	39	29897	5'UTR	45	extragenic		5'UTR:45	G45C
EPI_ISL_414627	241	C	T	235	29897	5'UTR	241	extragenic		5'UTR:241	C241T
EPI_ISL_414627	1059	C	T	1053	29897	NSP2	T85I	SNP	Non-Structural protein 2	NSP2:T85I	C1059T
EPI_ISL_414627	3037	C	T	3031	29897	NSP3	F106F	SNP_silent	Predicted phosphoesterase, papain-like proteinase	NSP3:F106F	C3037T
EPI_ISL_414627	14408	C	T	14402	29897	NSP12b	P314L	SNP	RNA-dependent RNA polymerase, post-ribosomal frameshift	NSP12b:P314L	C14408T
EPI_ISL_414627	23403	A	G	23397	29897	S	D614G	SNP	Spike	S:D614G	A23403G
EPI_ISL_414627	25563	G	T	25557	29897	ORF3a	Q57H	SNP	ORF3a protein	ORF3a:Q57H	G25563T
EPI_ISL_414637	13	T	A	13	29903	5'UTR	13	extragenic		5'UTR:13	T13A
EPI_ISL_414637	241	C	T	241	29903	5'UTR	241	extragenic		5'UTR:241	C241T
EPI_ISL_414637	2416	C	T	2416	29903	NSP2	Y537Y	SNP_silent	Non-Structural protein 2	NSP2:Y537Y	C2416T
EPI_ISL_414637	3037	C	T	3037	29903	NSP3	F106F	SNP_silent	Predicted phosphoesterase, papain-like proteinase	NSP3:F106F	C3037T
EPI_ISL_414637	14408	C	T	14408	29903	NSP12b	P314L	SNP	RNA-dependent RNA polymerase, post-ribosomal frameshift	NSP12b:P314L	C14408T
EPI_ISL_414637	19884	C	T	19884	29903	NSP15	Y88Y	SNP_silent	endoRNAse	NSP15:Y88Y	C19884T
EPI_ISL_414637	23403	A	G	23403	29903	S	D614G	SNP	Spike	S:D614G	A23403G
EPI_ISL_414637	25563	G	T	25563	29903	ORF3a	Q57H	SNP	ORF3a protein	ORF3a:Q57H	G25563T
EPI_ISL_420736	13	T	C	13	29903	5'UTR	13	extragenic		5'UTR:13	T13C
EPI_ISL_420736	241	C	T	241	29903	5'UTR	241	extragenic		5'UTR:241	C241T
EPI_ISL_420736	3037	C	T	3037	29903	NSP3	F106F	SNP_silent	Predicted phosphoesterase, papain-like proteinase	NSP3:F106F	C3037T
EPI_ISL_420736	14408	C	T	14408	29903	NSP12b	P314L	SNP	RNA-dependent RNA polymerase, post-ribosomal frameshift	NSP12b:P314L	C14408T
EPI_ISL_420736	23403	A	G	23403	29903	S	D614G	SNP	Spike	S:D614G	A23403G
EPI_ISL_420736	28881	GGG	AAC	28881	29903	N	RG203KR	SNP	Nucleocapsid protein	N:RG203KR	GGG28881AAC
EPI_ISL_427250	13	T	C	12	29902	5'UTR	13	extragenic		5'UTR:13	T13C
EPI_ISL_427250	35	AC	TT	34	29902	5'UTR	35	extragenic		5'UTR:35	AC35TT
EPI_ISL_427250	241	C	T	240	29902	5'UTR	241	extragenic		5'UTR:241	C241T
EPI_ISL_427250	1059	C	T	1058	29902	NSP2	T85I	SNP	Non-Structural protein 2	NSP2:T85I	C1059T
EPI_ISL_427250	3037	C	T	3036	29902	NSP3	F106F	SNP_silent	Predicted phosphoesterase, papain-like proteinase	NSP3:F106F	C3037T
EPI_ISL_427250	14408	C	T	14407	29902	NSP12b	P314L	SNP	RNA-dependent RNA polymerase, post-ribosomal frameshift	NSP12b:P314L	C14408T
EPI_ISL_427250	19263	C	T	19262	29902	NSP14	N408N	SNP_silent	3'-to-5' exonuclease	NSP14:N408N	C19263T
EPI_ISL_427250	23403	A	G	23402	29902	S	D614G	SNP	Spike	S:D614G	A23403G
EPI_ISL_427250	25563	G	T	25562	29902	ORF3a	Q57H	SNP	ORF3a protein	ORF3a:Q57H	G25563T
EPI_ISL_427250	29445	C	T	29444	29902	N	T391I	SNP	Nucleocapsid protein	N:T391I	C29445T
EPI_ISL_427470	13	T	C	13	29903	5'UTR	13	extragenic		5'UTR:13	T13C
EPI_ISL_427470	241	C	T	241	29903	5'UTR	241	extragenic		5'UTR:241	C241T
EPI_ISL_427470	1059	C	T	1059	29903	NSP2	T85I	SNP	Non-Structural protein 2	NSP2:T85I	C1059T
EPI_ISL_427470	3037	C	T	3037	29903	NSP3	F106F	SNP_silent	Predicted phosphoesterase, papain-like proteinase	NSP3:F106F	C3037T
EPI_ISL_427470	8078	C	T	8078	29903	NSP3	P1787S	SNP	Predicted phosphoesterase, papain-like proteinase	NSP3:P1787S	C8078T
EPI_ISL_427470	14408	C	T	14408	29903	NSP12b	P314L	SNP	RNA-dependent RNA polymerase, post-ribosomal frameshift	NSP12b:P314L	C14408T
EPI_ISL_427470	19521	T	C	19521	29903	NSP14	Y494Y	SNP_silent	3'-to-5' exonuclease	NSP14:Y494Y	T19521C
EPI_ISL_427470	23403	A	G	23403	29903	S	D614G	SNP	Spike	S:D614G	A23403G
EPI_ISL_427470	25563	G	T	25563	29903	ORF3a	Q57H	SNP	ORF3a protein	ORF3a:Q57H	G25563T
EPI_ISL_427470	28615	A	G	28615	29903	N	G114G	SNP_silent	Nucleocapsid protein	N:G114G	A28615G
EPI_ISL_434105	13	T	C	13	29903	5'UTR	13	extragenic		5'UTR:13	T13C
EPI_ISL_434105	3311	C	A	3311	29903	NSP3	L198I	SNP	Predicted phosphoesterase, papain-like proteinase	NSP3:L198I	C3311A
EPI_ISL_434105	8782	C	T	8782	29903	NSP4	S76S	SNP_silent	Transmembrane protein	NSP4:S76S	C8782T
EPI_ISL_434105	17671	G	T	17671	29903	NSP13	V479F	SNP	Helicase	NSP13:V479F	G17671T
EPI_ISL_434105	17747	C	T	17747	29903	NSP13	P504L	SNP	Helicase	NSP13:P504L	C17747T
EPI_ISL_434105	17858	A	G	17858	29903	NSP13	Y541C	SNP	Helicase	NSP13:Y541C	A17858G
EPI_ISL_434105	18060	C	T	18060	29903	NSP14	L7L	SNP_silent	3'-to-5' exonuclease	NSP14:L7L	C18060T
EPI_ISL_434105	28144	T	C	28144	29903	ORF8	L84S	SNP	ORF8 protein	ORF8:L84S	T28144C
EPI_ISL_434226	13	T	C	13	29903	5'UTR	13	extragenic		5'UTR:13	T13C
EPI_ISL_434226	3311	C	A	3311	29903	NSP3	L198I	SNP	Predicted phosphoesterase, papain-like proteinase	NSP3:L198I	C3311A
EPI_ISL_434226	8782	C	T	8782	29903	NSP4	S76S	SNP_silent	Transmembrane protein	NSP4:S76S	C8782T
EPI_ISL_434226	17671	G	T	17671	29903	NSP13	V479F	SNP	Helicase	NSP13:V479F	G17671T
EPI_ISL_434226	17747	C	T	17747	29903	NSP13	P504L	SNP	Helicase	NSP13:P504L	C17747T
EPI_ISL_434226	17858	A	G	17858	29903	NSP13	Y541C	SNP	Helicase	NSP13:Y541C	A17858G
EPI_ISL_434226	18060	C	T	18060	29903	NSP14	L7L	SNP_silent	3'-to-5' exonuclease	NSP14:L7L	C18060T
EPI_ISL_434226	28144	T	C	28144	29903	ORF8	L84S	SNP	ORF8 protein	ORF8:L84S	T28144C
EPI_ISL_435722	13	T	C	13	29901	5'UTR	13	extragenic		5'UTR:13	T13C
EPI_ISL_435722	241	C	T	241	29901	5'UTR	241	extragenic		5'UTR:241	C241T
EPI_ISL_435722	1059	C	T	1059	29901	NSP2	T85I	SNP	Non-Structural protein 2	NSP2:T85I	C1059T
EPI_ISL_435722	3037	C	T	3037	29901	NSP3	F106F	SNP_silent	Predicted phosphoesterase, papain-like proteinase	NSP3:F106F	C3037T
EPI_ISL_435722	6385	C	T	6385	29901	NSP3	A1222A	SNP_silent	Predicted phosphoesterase, papain-like proteinase	NSP3:A1222A	C6385T
EPI_ISL_435722	11916	C	T	11916	29901	NSP7	S25L	SNP	Non-Structural Protein 7	NSP7:S25L	C11916T
EPI_ISL_435722	14408	C	T	14408	29901	NSP12b	P314L	SNP	RNA-dependent RNA polymerase, post-ribosomal frameshift	NSP12b:P314L	C14408T
EPI_ISL_435722	18998	C	T	18998	29901	NSP14	A320V	SNP	3'-to-5' exonuclease	NSP14:A320V	C18998T
EPI_ISL_435722	20272	A	G	20272	29901	NSP15	M218V	SNP	endoRNAse	NSP15:M218V	A20272G
EPI_ISL_435722	23403	A	G	23403	29901	S	D614G	SNP	Spike	S:D614G	A23403G
EPI_ISL_435722	25563	G	T	25563	29901	ORF3a	Q57H	SNP	ORF3a protein	ORF3a:Q57H	G25563T
EPI_ISL_435722	26159	TT	.	26158	29901	ORF3a	V256	deletion_frameshift	ORF3a protein	ORF3a:V256	TT26159.
EPI_ISL_435722	29540	G	A	29538	29901	3'UTR	29540	extragenic		3'UTR:29540	G29540A
EPI_ISL_438161	13	T	C	13	29903	5'UTR	13	extragenic		5'UTR:13	T13C
EPI_ISL_438161	241	C	T	241	29903	5'UTR	241	extragenic		5'UTR:241	C241T
EPI_ISL_438161	313	C	T	313	29903	NSP1	L16L	SNP_silent	Leader protein	NSP1:L16L	C313T
EPI_ISL_438161	3037	C	T	3037	29903	NSP3	F106F	SNP_silent	Predicted phosphoesterase, papain-like proteinase	NSP3:F106F	C3037T
EPI_ISL_438161	8200	T	C	8200	29903	NSP3	D1827D	SNP_silent	Predicted phosphoesterase, papain-like proteinase	NSP3:D1827D	T8200C
EPI_ISL_438161	14408	C	T	14408	29903	NSP12b	P314L	SNP	RNA-dependent RNA polymerase, post-ribosomal frameshift	NSP12b:P314L	C14408T
EPI_ISL_438161	23403	A	G	23403	29903	S	D614G	SNP	Spike	S:D614G	A23403G
EPI_ISL_438161	25552	G	T	25552	29903	ORF3a	A54S	SNP	ORF3a protein	ORF3a:A54S	G25552T
EPI_ISL_438161	28881	GGG	AAC	28881	29903	N	RG203KR	SNP	Nucleocapsid protein	N:RG203KR	GGG28881AAC
EPI_ISL_445767	13	T	C	13	29903	5'UTR	13	extragenic		5'UTR:13	T13C
EPI_ISL_445767	241	C	T	241	29903	5'UTR	241	extragenic		5'UTR:241	C241T
EPI_ISL_445767	3037	C	T	3037	29903	NSP3	F106F	SNP_silent	Predicted phosphoesterase, papain-like proteinase	NSP3:F106F	C3037T
EPI_ISL_445767	14408	C	T	14408	29903	NSP12b	P314L	SNP	RNA-dependent RNA polymerase, post-ribosomal frameshift	NSP12b:P314L	C14408T
EPI_ISL_445767	20268	A	G	20268	29903	NSP15	L216L	SNP_silent	endoRNAse	NSP15:L216L	A20268G
EPI_ISL_445767	23403	A	G	23403	29903	S	D614G	SNP	Spike	S:D614G	A23403G
EPI_ISL_445767	28854	C	T	28854	29903	N	S194L	SNP	Nucleocapsid protein	N:S194L	C28854T
EPI_ISL_449931	13	T	C	13	29903	5'UTR	13	extragenic		5'UTR:13	T13C
EPI_ISL_449931	3311	C	A	3311	29903	NSP3	L198I	SNP	Predicted phosphoesterase, papain-like proteinase	NSP3:L198I	C3311A
EPI_ISL_449931	4015	AGA	TCT	4015	29903	NSP3	E433L	SNP	Predicted phosphoesterase, papain-like proteinase	NSP3:E433L	AGA4015TCT
EPI_ISL_449931	8782	C	T	8782	29903	NSP4	S76S	SNP_silent	Transmembrane protein	NSP4:S76S	C8782T
EPI_ISL_449931	17671	G	T	17671	29903	NSP13	V479F	SNP	Helicase	NSP13:V479F	G17671T
EPI_ISL_449931	17747	C	T	17747	29903	NSP13	P504L	SNP	Helicase	NSP13:P504L	C17747T
EPI_ISL_449931	17858	A	G	17858	29903	NSP13	Y541C	SNP	Helicase	NSP13:Y541C	A17858G
EPI_ISL_449931	18060	C	T	18060	29903	NSP14	L7L	SNP_silent	3'-to-5' exonuclease	NSP14:L7L	C18060T
EPI_ISL_449931	28144	T	C	28144	29903	ORF8	L84S	SNP	ORF8 protein	ORF8:L84S	T28144C
EPI_ISL_450342	13	T	C	29	29917	5'UTR	13	extragenic		5'UTR:13	T13C
EPI_ISL_450342	280	C	T	296	29917	NSP1	V5V	SNP_silent	Leader protein	NSP1:V5V	C280T
EPI_ISL_450342	8782	C	T	8798	29917	NSP4	S76S	SNP_silent	Transmembrane protein	NSP4:S76S	C8782T
EPI_ISL_450342	10329	A	G	10345	29917	NSP5	D92G	SNP	3C-like proteinase	NSP5:D92G	A10329G
EPI_ISL_450342	10870	G	T	10886	29917	NSP5	L272L	SNP_silent	3C-like proteinase	NSP5:L272L	G10870T
EPI_ISL_450342	12119	C	T	12135	29917	NSP8	P10S	SNP	Non-Structural Protein 8	NSP8:P10S	C12119T
EPI_ISL_450342	15324	C	T	15340	29917	NSP12b	N619N	SNP_silent	RNA-dependent RNA polymerase, post-ribosomal frameshift	NSP12b:N619N	C15324T
EPI_ISL_450342	19414	G	A	19430	29917	NSP14	V459I	SNP	3'-to-5' exonuclease	NSP14:V459I	G19414A
EPI_ISL_450342	22468	G	T	22484	29917	S	T302T	SNP_silent	Spike	S:T302T	G22468T
EPI_ISL_450342	28144	T	C	28160	29917	ORF8	L84S	SNP	ORF8 protein	ORF8:L84S	T28144C
EPI_ISL_450342	28878	G	A	28894	29917	N	S202N	SNP	Nucleocapsid protein	N:S202N	G28878A
EPI_ISL_450342	29742	G	A	29758	29917	3'UTR	29742	extragenic		3'UTR:29742	G29742A
EPI_ISL_452336	13	T	A	13	29903	5'UTR	13	extragenic		5'UTR:13	T13A
EPI_ISL_452336	1397	G	A	1397	29903	NSP2	V198I	SNP	Non-Structural protein 2	NSP2:V198I	G1397A
EPI_ISL_452336	7837	A	T	7837	29903	NSP3	L1706F	SNP	Predicted phosphoesterase, papain-like proteinase	NSP3:L1706F	A7837T
EPI_ISL_452336	8022	T	G	8022	29903	NSP3	V1768G	SNP	Predicted phosphoesterase, papain-like proteinase	NSP3:V1768G	T8022G
EPI_ISL_452336	9430	C	T	9430	29903	NSP4	I292I	SNP_silent	Transmembrane protein	NSP4:I292I	C9430T
EPI_ISL_452336	15327	G	T	15327	29903	NSP12b	M620I	SNP	RNA-dependent RNA polymerase, post-ribosomal frameshift	NSP12b:M620I	G15327T
EPI_ISL_452336	18029	C	T	18029	29903	NSP13	A598V	SNP	Helicase	NSP13:A598V	C18029T
EPI_ISL_452336	19299	T	G	19299	29903	NSP14	Y420*	SNP_stop	3'-to-5' exonuclease	NSP14:Y420*	T19299G
EPI_ISL_452336	24812	G	T	24812	29903	S	D1084Y	SNP	Spike	S:D1084Y	G24812T
EPI_ISL_452336	28305	A	C	28305	29903	N	N11T	SNP	Nucleocapsid protein	N:N11T	A28305C
EPI_ISL_452336	28688	T	C	28688	29903	N	A138A	SNP_silent	Nucleocapsid protein	N:A138A	T28688C
EPI_ISL_452336	29742	G	T	29742	29903	3'UTR	29742	extragenic		3'UTR:29742	G29742T
EPI_ISL_461456	13	T	C	8	29916	5'UTR	13	extragenic		5'UTR:13	T13C
EPI_ISL_461456	241	C	T	236	29916	5'UTR	241	extragenic		5'UTR:241	C241T
EPI_ISL_461456	1059	C	T	1054	29916	NSP2	T85I	SNP	Non-Structural protein 2	NSP2:T85I	C1059T
EPI_ISL_461456	3037	C	T	3032	29916	NSP3	F106F	SNP_silent	Predicted phosphoesterase, papain-like proteinase	NSP3:F106F	C3037T
EPI_ISL_461456	7564	C	T	7559	29916	NSP3	S1615S	SNP_silent	Predicted phosphoesterase, papain-like proteinase	NSP3:S1615S	C7564T
EPI_ISL_461456	11083	G	T	11078	29916	NSP6	L37F	SNP	Transmembrane protein	NSP6:L37F	G11083T
EPI_ISL_461456	14408	C	T	14403	29916	NSP12b	P314L	SNP	RNA-dependent RNA polymerase, post-ribosomal frameshift	NSP12b:P314L	C14408T
EPI_ISL_461456	23403	A	G	23398	29916	S	D614G	SNP	Spike	S:D614G	A23403G
EPI_ISL_461456	25563	G	T	25558	29916	ORF3a	Q57H	SNP	ORF3a protein	ORF3a:Q57H	G25563T
EPI_ISL_461456	28376	G	T	28371	29916	N	A35S	SNP	Nucleocapsid protein	N:A35S	G28376T
EPI_ISL_461456	29861	GG	AA	29856	29916	3'UTR	29861	extragenic		3'UTR:29861	GG29861AA
EPI_ISL_461456	29864	G	A	29859	29916	3'UTR	29864	extragenic		3'UTR:29864	G29864A
EPI_ISL_461456	29867	TG	AA	29862	29916	3'UTR	29867	extragenic		3'UTR:29867	TG29867AA
EPI_ISL_461456	29870	C	A	29865	29916	3'UTR	29870	extragenic		3'UTR:29870	C29870A
EPI_ISL_461458	13	T	C	7	29915	5'UTR	13	extragenic		5'UTR:13	T13C
EPI_ISL_461458	241	C	T	235	29915	5'UTR	241	extragenic		5'UTR:241	C241T
EPI_ISL_461458	1059	C	T	1053	29915	NSP2	T85I	SNP	Non-Structural protein 2	NSP2:T85I	C1059T
EPI_ISL_461458	3037	C	T	3031	29915	NSP3	F106F	SNP_silent	Predicted phosphoesterase, papain-like proteinase	NSP3:F106F	C3037T
EPI_ISL_461458	7564	C	T	7558	29915	NSP3	S1615S	SNP_silent	Predicted phosphoesterase, papain-like proteinase	NSP3:S1615S	C7564T
EPI_ISL_461458	11083	G	T	11077	29915	NSP6	L37F	SNP	Transmembrane protein	NSP6:L37F	G11083T
EPI_ISL_461458	13252	C	T	13246	29915	NSP10	Y76Y	SNP_silent	Growth-factor-like protein	NSP10:Y76Y	C13252T
EPI_ISL_461458	14408	C	T	14402	29915	NSP12b	P314L	SNP	RNA-dependent RNA polymerase, post-ribosomal frameshift	NSP12b:P314L	C14408T
EPI_ISL_461458	23403	A	G	23397	29915	S	D614G	SNP	Spike	S:D614G	A23403G
EPI_ISL_461458	25563	G	T	25557	29915	ORF3a	Q57H	SNP	ORF3a protein	ORF3a:Q57H	G25563T
EPI_ISL_461458	28376	G	T	28370	29915	N	A35S	SNP	Nucleocapsid protein	N:A35S	G28376T
EPI_ISL_461458	29861	GG	AA	29855	29915	3'UTR	29861	extragenic		3'UTR:29861	GG29861AA
EPI_ISL_461458	29864	G	A	29858	29915	3'UTR	29864	extragenic		3'UTR:29864	G29864A
EPI_ISL_461458	29867	TG	AA	29861	29915	3'UTR	29867	extragenic		3'UTR:29867	TG29867AA
EPI_ISL_461458	29870	C	A	29864	29915	3'UTR	29870	extragenic		3'UTR:29870	C29870A
EPI_ISL_461463	13	T	C	6	29914	5'UTR	13	extragenic		5'UTR:13	T13C
EPI_ISL_461463	241	C	T	234	29914	5'UTR	241	extragenic		5'UTR:241	C241T
EPI_ISL_461463	1059	C	T	1052	29914	NSP2	T85I	SNP	Non-Structural protein 2	NSP2:T85I	C1059T
EPI_ISL_461463	3037	C	T	3030	29914	NSP3	F106F	SNP_silent	Predicted phosphoesterase, papain-like proteinase	NSP3:F106F	C3037T
EPI_ISL_461463	7564	C	T	7557	29914	NSP3	S1615S	SNP_silent	Predicted phosphoesterase, papain-like proteinase	NSP3:S1615S	C7564T
EPI_ISL_461463	11083	G	T	11076	29914	NSP6	L37F	SNP	Transmembrane protein	NSP6:L37F	G11083T
EPI_ISL_461463	14408	C	T	14401	29914	NSP12b	P314L	SNP	RNA-dependent RNA polymerase, post-ribosomal frameshift	NSP12b:P314L	C14408T
EPI_ISL_461463	23403	A	G	23396	29914	S	D614G	SNP	Spike	S:D614G	A23403G
EPI_ISL_461463	25563	G	T	25556	29914	ORF3a	Q57H	SNP	ORF3a protein	ORF3a:Q57H	G25563T
EPI_ISL_461463	28376	G	T	28369	29914	N	A35S	SNP	Nucleocapsid protein	N:A35S	G28376T
EPI_ISL_461463	29861	GG	AA	29854	29914	3'UTR	29861	extragenic		3'UTR:29861	GG29861AA
EPI_ISL_461463	29864	G	A	29857	29914	3'UTR	29864	extragenic		3'UTR:29864	G29864A
EPI_ISL_461463	29867	TG	AA	29860	29914	3'UTR	29867	extragenic		3'UTR:29867	TG29867AA
EPI_ISL_461463	29870	C	A	29863	29914	3'UTR	29870	extragenic		3'UTR:29870	C29870A
EPI_ISL_461464	13	T	C	5	29913	5'UTR	13	extragenic		5'UTR:13	T13C
EPI_ISL_461464	241	C	T	233	29913	5'UTR	241	extragenic		5'UTR:241	C241T
EPI_ISL_461464	1059	C	T	1051	29913	NSP2	T85I	SNP	Non-Structural protein 2	NSP2:T85I	C1059T
EPI_ISL_461464	3037	C	T	3029	29913	NSP3	F106F	SNP_silent	Predicted phosphoesterase, papain-like proteinase	NSP3:F106F	C3037T
EPI_ISL_461464	7564	C	T	7556	29913	NSP3	S1615S	SNP_silent	Predicted phosphoesterase, papain-like proteinase	NSP3:S1615S	C7564T
EPI_ISL_461464	11083	G	T	11075	29913	NSP6	L37F	SNP	Transmembrane protein	NSP6:L37F	G11083T
EPI_ISL_461464	14408	C	T	14400	29913	NSP12b	P314L	SNP	RNA-dependent RNA polymerase, post-ribosomal frameshift	NSP12b:P314L	C14408T
EPI_ISL_461464	23403	A	G	23395	29913	S	D614G	SNP	Spike	S:D614G	A23403G
EPI_ISL_461464	25563	G	T	25555	29913	ORF3a	Q57H	SNP	ORF3a protein	ORF3a:Q57H	G25563T
EPI_ISL_461464	28376	G	T	28368	29913	N	A35S	SNP	Nucleocapsid protein	N:A35S	G28376T
EPI_ISL_461464	29859	T	A	29851	29913	3'UTR	29859	extragenic		3'UTR:29859	T29859A
EPI_ISL_461464	29861	GG	AA	29853	29913	3'UTR	29861	extragenic		3'UTR:29861	GG29861AA
EPI_ISL_461464	29864	G	A	29856	29913	3'UTR	29864	extragenic		3'UTR:29864	G29864A
EPI_ISL_461464	29867	TG	AA	29859	29913	3'UTR	29867	extragenic		3'UTR:29867	TG29867AA
EPI_ISL_461464	29870	C	A	29862	29913	3'UTR	29870	extragenic		3'UTR:29870	C29870A
EPI_ISL_461473	13	T	C	11	29919	5'UTR	13	extragenic		5'UTR:13	T13C
EPI_ISL_461473	241	C	T	239	29919	5'UTR	241	extragenic		5'UTR:241	C241T
EPI_ISL_461473	1059	C	T	1057	29919	NSP2	T85I	SNP	Non-Structural protein 2	NSP2:T85I	C1059T
EPI_ISL_461473	3037	C	T	3035	29919	NSP3	F106F	SNP_silent	Predicted phosphoesterase, papain-like proteinase	NSP3:F106F	C3037T
EPI_ISL_461473	7564	C	T	7562	29919	NSP3	S1615S	SNP_silent	Predicted phosphoesterase, papain-like proteinase	NSP3:S1615S	C7564T
EPI_ISL_461473	8290	C	T	8288	29919	NSP3	L1857L	SNP_silent	Predicted phosphoesterase, papain-like proteinase	NSP3:L1857L	C8290T
EPI_ISL_461473	11083	G	T	11081	29919	NSP6	L37F	SNP	Transmembrane protein	NSP6:L37F	G11083T
EPI_ISL_461473	14408	C	T	14406	29919	NSP12b	P314L	SNP	RNA-dependent RNA polymerase, post-ribosomal frameshift	NSP12b:P314L	C14408T
EPI_ISL_461473	23403	A	G	23401	29919	S	D614G	SNP	Spike	S:D614G	A23403G
EPI_ISL_461473	25563	G	T	25561	29919	ORF3a	Q57H	SNP	ORF3a protein	ORF3a:Q57H	G25563T
EPI_ISL_461473	28376	G	T	28374	29919	N	A35S	SNP	Nucleocapsid protein	N:A35S	G28376T
EPI_ISL_461473	29861	GG	AA	29859	29919	3'UTR	29861	extragenic		3'UTR:29861	GG29861AA
EPI_ISL_461473	29864	G	A	29862	29919	3'UTR	29864	extragenic		3'UTR:29864	G29864A
EPI_ISL_461473	29867	TG	AA	29865	29919	3'UTR	29867	extragenic		3'UTR:29867	TG29867AA
EPI_ISL_461473	29870	C	A	29868	29919	3'UTR	29870	extragenic		3'UTR:29870	C29870A
EPI_ISL_464988	13	T	C	13	29903	5'UTR	13	extragenic		5'UTR:13	T13C
EPI_ISL_467985	13	T	C	11	29901	5'UTR	13	extragenic		5'UTR:13	T13C
EPI_ISL_467985	490	T	A	488	29901	NSP1	D75E	SNP	Leader protein	NSP1:D75E	T490A
EPI_ISL_467985	3177	C	T	3175	29901	NSP3	P153L	SNP	Predicted phosphoesterase, papain-like proteinase	NSP3:P153L	C3177T
EPI_ISL_467985	7069	A	G	7067	29901	NSP3	E1450E	SNP_silent	Predicted phosphoesterase, papain-like proteinase	NSP3:E1450E	A7069G
EPI_ISL_467985	8782	C	T	8780	29901	NSP4	S76S	SNP_silent	Transmembrane protein	NSP4:S76S	C8782T
EPI_ISL_467985	18736	T	C	18734	29901	NSP14	F233L	SNP	3'-to-5' exonuclease	NSP14:F233L	T18736C
EPI_ISL_467985	19684	G	T	19682	29901	NSP15	V22L	SNP	endoRNAse	NSP15:V22L	G19684T
EPI_ISL_467985	24034	C	T	24032	29901	S	N824N	SNP_silent	Spike	S:N824N	C24034T
EPI_ISL_467985	26729	T	C	26727	29901	M	A69A	SNP_silent	Membrane	M:A69A	T26729C
EPI_ISL_467985	28077	G	C	28075	29901	ORF8	V62L	SNP	ORF8 protein	ORF8:V62L	G28077C
EPI_ISL_467985	28144	T	C	28142	29901	ORF8	L84S	SNP	ORF8 protein	ORF8:L84S	T28144C
EPI_ISL_467985	29700	A	G	29698	29901	3'UTR	29700	extragenic		3'UTR:29700	A29700G
EPI_ISL_445268	14	A	G	14	29852	5'UTR	14	extragenic		5'UTR:14	A14G
EPI_ISL_445268	241	C	T	241	29852	5'UTR	241	extragenic		5'UTR:241	C241T
EPI_ISL_445268	3037	C	T	3037	29852	NSP3	F106F	SNP_silent	Predicted phosphoesterase, papain-like proteinase	NSP3:F106F	C3037T
EPI_ISL_445268	14408	C	T	14408	29852	NSP12b	P314L	SNP	RNA-dependent RNA polymerase, post-ribosomal frameshift	NSP12b:P314L	C14408T
EPI_ISL_445268	23403	A	G	23403	29852	S	D614G	SNP	Spike	S:D614G	A23403G
EPI_ISL_445268	25350	C	T	25350	29852	S	P1263L	SNP	Spike	S:P1263L	C25350T
EPI_ISL_420569	15	C	T	15	29903	5'UTR	15	extragenic		5'UTR:15	C15T
EPI_ISL_420569	241	C	T	241	29903	5'UTR	241	extragenic		5'UTR:241	C241T
EPI_ISL_420569	3037	C	T	3037	29903	NSP3	F106F	SNP_silent	Predicted phosphoesterase, papain-like proteinase	NSP3:F106F	C3037T
EPI_ISL_420569	14408	C	T	14408	29903	NSP12b	P314L	SNP	RNA-dependent RNA polymerase, post-ribosomal frameshift	NSP12b:P314L	C14408T
EPI_ISL_420569	23403	A	G	23403	29903	S	D614G	SNP	Spike	S:D614G	A23403G
EPI_ISL_420569	28881	GGG	AAC	28881	29903	N	RG203KR	SNP	Nucleocapsid protein	N:RG203KR	GGG28881AAC
EPI_ISL_450332	15	C	.	8	29852	5'UTR	15	extragenic		5'UTR:15	C15.
EPI_ISL_450332	1281	C	T	1274	29852	NSP2	A159V	SNP	Non-Structural protein 2	NSP2:A159V	C1281T
EPI_ISL_450332	6312	C	A	6305	29852	NSP3	T1198K	SNP	Predicted phosphoesterase, papain-like proteinase	NSP3:T1198K	C6312A
EPI_ISL_450332	11083	G	T	11076	29852	NSP6	L37F	SNP	Transmembrane protein	NSP6:L37F	G11083T
EPI_ISL_450332	13730	C	T	13723	29852	NSP12b	A88V	SNP	RNA-dependent RNA polymerase, post-ribosomal frameshift	NSP12b:A88V	C13730T
EPI_ISL_450332	23929	C	T	23922	29852	S	Y789Y	SNP_silent	Spike	S:Y789Y	C23929T
EPI_ISL_450332	28311	C	T	28304	29852	N	P13L	SNP	Nucleocapsid protein	N:P13L	C28311T
EPI_ISL_436435	16	C	A	16	29866	5'UTR	16	extragenic		5'UTR:16	C16A
EPI_ISL_436435	6312	C	A	6312	29866	NSP3	T1198K	SNP	Predicted phosphoesterase, papain-like proteinase	NSP3:T1198K	C6312A
EPI_ISL_436435	7621	T	C	7621	29866	NSP3	C1634C	SNP_silent	Predicted phosphoesterase, papain-like proteinase	NSP3:C1634C	T7621C
EPI_ISL_436435	11083	G	T	11083	29866	NSP6	L37F	SNP	Transmembrane protein	NSP6:L37F	G11083T
EPI_ISL_436435	13730	C	T	13730	29866	NSP12b	A88V	SNP	RNA-dependent RNA polymerase, post-ribosomal frameshift	NSP12b:A88V	C13730T
EPI_ISL_436435	23929	C	T	23929	29866	S	Y789Y	SNP_silent	Spike	S:Y789Y	C23929T
EPI_ISL_436435	28311	C	T	28311	29866	N	P13L	SNP	Nucleocapsid protein	N:P13L	C28311T
EPI_ISL_452333	16	C	A	16	29903	5'UTR	16	extragenic		5'UTR:16	C16A
EPI_ISL_452333	884	C	T	884	29903	NSP2	R27C	SNP	Non-Structural protein 2	NSP2:R27C	C884T
EPI_ISL_452333	1397	G	A	1397	29903	NSP2	V198I	SNP	Non-Structural protein 2	NSP2:V198I	G1397A
EPI_ISL_452333	8022	T	G	8022	29903	NSP3	V1768G	SNP	Predicted phosphoesterase, papain-like proteinase	NSP3:V1768G	T8022G
EPI_ISL_452333	8653	G	T	8653	29903	NSP4	M33I	SNP	Transmembrane protein	NSP4:M33I	G8653T
EPI_ISL_452333	20891	T	G	20891	29903	NSP16	V78G	SNP	2'-O-ribose methyltransferase	NSP16:V78G	T20891G
EPI_ISL_452333	28688	T	C	28688	29903	N	A138A	SNP_silent	Nucleocapsid protein	N:A138A	T28688C
EPI_ISL_452333	29742	G	T	29742	29903	3'UTR	29742	extragenic		3'UTR:29742	G29742T
EPI_ISL_463006	17	T	C	5	29825	5'UTR	17	extragenic		5'UTR:17	T17C
EPI_ISL_463006	241	C	T	229	29825	5'UTR	241	extragenic		5'UTR:241	C241T
EPI_ISL_463006	1059	C	T	1047	29825	NSP2	T85I	SNP	Non-Structural protein 2	NSP2:T85I	C1059T
EPI_ISL_463006	1666	T	C	1654	29825	NSP2	F287F	SNP_silent	Non-Structural protein 2	NSP2:F287F	T1666C
EPI_ISL_463006	3037	C	T	3025	29825	NSP3	F106F	SNP_silent	Predicted phosphoesterase, papain-like proteinase	NSP3:F106F	C3037T
EPI_ISL_463006	14408	C	T	14396	29825	NSP12b	P314L	SNP	RNA-dependent RNA polymerase, post-ribosomal frameshift	NSP12b:P314L	C14408T
EPI_ISL_463006	23403	A	G	23391	29825	S	D614G	SNP	Spike	S:D614G	A23403G
EPI_ISL_463006	25563	G	T	25551	29825	ORF3a	Q57H	SNP	ORF3a protein	ORF3a:Q57H	G25563T
EPI_ISL_463006	28346	GG	TT	28334	29825	N	G25F	SNP	Nucleocapsid protein	N:G25F	GG28346TT
EPI_ISL_463006	29811	T	C	29799	29825	3'UTR	29811	extragenic		3'UTR:29811	T29811C
EPI_ISL_463006	29813	A	G	29801	29825	3'UTR	29813	extragenic		3'UTR:29813	A29813G
EPI_ISL_463006	29817	T	G	29805	29825	3'UTR	29817	extragenic		3'UTR:29817	T29817G
EPI_ISL_463006	29822	T	C	29810	29825	3'UTR	29822	extragenic		3'UTR:29822	T29822C
EPI_ISL_463006	29824	A	C	29812	29825	3'UTR	29824	extragenic		3'UTR:29824	A29824C
EPI_ISL_414624	18	T	C	18	29903	5'UTR	18	extragenic		5'UTR:18	T18C
EPI_ISL_414624	187	A	G	187	29903	5'UTR	187	extragenic		5'UTR:187	A187G
EPI_ISL_414624	241	C	T	241	29903	5'UTR	241	extragenic		5'UTR:241	C241T
EPI_ISL_414624	3037	C	T	3037	29903	NSP3	F106F	SNP_silent	Predicted phosphoesterase, papain-like proteinase	NSP3:F106F	C3037T
EPI_ISL_414624	10728	C	T	10728	29903	NSP5	T225I	SNP	3C-like proteinase	NSP5:T225I	C10728T
EPI_ISL_414624	14408	C	T	14408	29903	NSP12b	P314L	SNP	RNA-dependent RNA polymerase, post-ribosomal frameshift	NSP12b:P314L	C14408T
EPI_ISL_414624	23403	A	G	23403	29903	S	D614G	SNP	Spike	S:D614G	A23403G
EPI_ISL_414634	18	T	C	18	29902	5'UTR	18	extragenic		5'UTR:18	T18C
EPI_ISL_414634	26	A	.	25	29902	5'UTR	26	extragenic		5'UTR:26	A26.
EPI_ISL_414634	28	C	T	27	29902	5'UTR	28	extragenic		5'UTR:28	C28T
EPI_ISL_414634	241	C	T	240	29902	5'UTR	241	extragenic		5'UTR:241	C241T
EPI_ISL_414634	1059	C	T	1058	29902	NSP2	T85I	SNP	Non-Structural protein 2	NSP2:T85I	C1059T
EPI_ISL_414634	3037	C	T	3036	29902	NSP3	F106F	SNP_silent	Predicted phosphoesterase, papain-like proteinase	NSP3:F106F	C3037T
EPI_ISL_414634	5348	C	T	5347	29902	NSP3	A876A	SNP_silent	Predicted phosphoesterase, papain-like proteinase	NSP3:A876A	C5348T
EPI_ISL_414634	8651	A	G	8650	29902	NSP4	M33V	SNP	Transmembrane protein	NSP4:M33V	A8651G
EPI_ISL_414634	14408	C	T	14407	29902	NSP12b	P314L	SNP	RNA-dependent RNA polymerase, post-ribosomal frameshift	NSP12b:P314L	C14408T
EPI_ISL_414634	23403	A	G	23402	29902	S	D614G	SNP	Spike	S:D614G	A23403G
EPI_ISL_414634	25046	C	G	25045	29902	S	P1162A	SNP	Spike	S:P1162A	C25046G
EPI_ISL_414634	25563	G	T	25562	29902	ORF3a	Q57H	SNP	ORF3a protein	ORF3a:Q57H	G25563T
EPI_ISL_414634	29866	A	C	29865	29902	3'UTR	29866	extragenic		3'UTR:29866	A29866C
EPI_ISL_437803	18	TC	GG	11	29912	5'UTR	18	extragenic		5'UTR:18	TC18GG
EPI_ISL_437803	28	C	T	21	29912	5'UTR	28	extragenic		5'UTR:28	C28T
EPI_ISL_437803	241	C	T	234	29912	5'UTR	241	extragenic		5'UTR:241	C241T
EPI_ISL_437803	1059	C	T	1052	29912	NSP2	T85I	SNP	Non-Structural protein 2	NSP2:T85I	C1059T
EPI_ISL_437803	3037	C	T	3030	29912	NSP3	F106F	SNP_silent	Predicted phosphoesterase, papain-like proteinase	NSP3:F106F	C3037T
EPI_ISL_437803	14408	C	T	14401	29912	NSP12b	P314L	SNP	RNA-dependent RNA polymerase, post-ribosomal frameshift	NSP12b:P314L	C14408T
EPI_ISL_437803	17808	G	T	17801	29912	NSP13	K524N	SNP	Helicase	NSP13:K524N	G17808T
EPI_ISL_437803	23403	A	G	23396	29912	S	D614G	SNP	Spike	S:D614G	A23403G
EPI_ISL_437803	25563	G	T	25556	29912	ORF3a	Q57H	SNP	ORF3a protein	ORF3a:Q57H	G25563T
EPI_ISL_437803	29553	G	A	29546	29912	3'UTR	29553	extragenic		3'UTR:29553	G29553A
EPI_ISL_437813	18	TC	GG	11	29896	5'UTR	18	extragenic		5'UTR:18	TC18GG
EPI_ISL_437813	222	C	T	215	29896	5'UTR	222	extragenic		5'UTR:222	C222T
EPI_ISL_437813	3558	A	G	3551	29896	NSP3	K280R	SNP	Predicted phosphoesterase, papain-like proteinase	NSP3:K280R	A3558G
EPI_ISL_437813	6693	A	G	6686	29896	NSP3	K1325R	SNP	Predicted phosphoesterase, papain-like proteinase	NSP3:K1325R	A6693G
EPI_ISL_437813	8782	C	T	8775	29896	NSP4	S76S	SNP_silent	Transmembrane protein	NSP4:S76S	C8782T
EPI_ISL_437813	17747	C	T	17740	29896	NSP13	P504L	SNP	Helicase	NSP13:P504L	C17747T
EPI_ISL_437813	17858	A	G	17851	29896	NSP13	Y541C	SNP	Helicase	NSP13:Y541C	A17858G
EPI_ISL_437813	18060	C	T	18053	29896	NSP14	L7L	SNP_silent	3'-to-5' exonuclease	NSP14:L7L	C18060T
EPI_ISL_437813	28144	T	C	28137	29896	ORF8	L84S	SNP	ORF8 protein	ORF8:L84S	T28144C
EPI_ISL_437813	29868	G	A	29861	29896	3'UTR	29868	extragenic		3'UTR:29868	G29868A
EPI_ISL_437813	29870	C	A	29863	29896	3'UTR	29870	extragenic		3'UTR:29870	C29870A
EPI_ISL_417563	19	C	T	19	29903	5'UTR	19	extragenic		5'UTR:19	C19T
EPI_ISL_417563	241	C	T	241	29903	5'UTR	241	extragenic		5'UTR:241	C241T
EPI_ISL_417563	3037	C	T	3037	29903	NSP3	F106F	SNP_silent	Predicted phosphoesterase, papain-like proteinase	NSP3:F106F	C3037T
EPI_ISL_417563	4276	C	T	4276	29903	NSP3	Y519Y	SNP_silent	Predicted phosphoesterase, papain-like proteinase	NSP3:Y519Y	C4276T
EPI_ISL_417563	13377	C	A	13377	29903	NSP10	T118N	SNP	Growth-factor-like protein	NSP10:T118N	C13377A
EPI_ISL_417563	14408	C	T	14408	29903	NSP12b	P314L	SNP	RNA-dependent RNA polymerase, post-ribosomal frameshift	NSP12b:P314L	C14408T
EPI_ISL_417563	23403	A	G	23403	29903	S	D614G	SNP	Spike	S:D614G	A23403G
EPI_ISL_417563	26530	A	G	26530	29903	M	D3G	SNP	Membrane	M:D3G	A26530G
EPI_ISL_448674	19	C	T	19	29903	5'UTR	19	extragenic		5'UTR:19	C19T
EPI_ISL_448674	241	C	T	241	29903	5'UTR	241	extragenic		5'UTR:241	C241T
EPI_ISL_448674	3037	C	T	3037	29903	NSP3	F106F	SNP_silent	Predicted phosphoesterase, papain-like proteinase	NSP3:F106F	C3037T
EPI_ISL_448674	12741	C	T	12741	29903	NSP9	T19I	SNP	ssRNA-binding protein	NSP9:T19I	C12741T
EPI_ISL_448674	14408	C	T	14408	29903	NSP12b	P314L	SNP	RNA-dependent RNA polymerase, post-ribosomal frameshift	NSP12b:P314L	C14408T
EPI_ISL_448674	23403	A	G	23403	29903	S	D614G	SNP	Spike	S:D614G	A23403G
EPI_ISL_448674	28881	GGG	AAC	28881	29903	N	RG203KR	SNP	Nucleocapsid protein	N:RG203KR	GGG28881AAC
EPI_ISL_448689	19	C	T	19	29903	5'UTR	19	extragenic		5'UTR:19	C19T
EPI_ISL_448689	241	C	T	241	29903	5'UTR	241	extragenic		5'UTR:241	C241T
EPI_ISL_448689	3037	C	T	3037	29903	NSP3	F106F	SNP_silent	Predicted phosphoesterase, papain-like proteinase	NSP3:F106F	C3037T
EPI_ISL_448689	12741	C	T	12741	29903	NSP9	T19I	SNP	ssRNA-binding protein	NSP9:T19I	C12741T
EPI_ISL_448689	14408	C	T	14408	29903	NSP12b	P314L	SNP	RNA-dependent RNA polymerase, post-ribosomal frameshift	NSP12b:P314L	C14408T
EPI_ISL_448689	23403	A	G	23403	29903	S	D614G	SNP	Spike	S:D614G	A23403G
EPI_ISL_448689	28881	GGG	AAC	28881	29903	N	RG203KR	SNP	Nucleocapsid protein	N:RG203KR	GGG28881AAC
EPI_ISL_451971	19	C	T	19	29903	5'UTR	19	extragenic		5'UTR:19	C19T
EPI_ISL_451971	106	C	T	106	29903	5'UTR	106	extragenic		5'UTR:106	C106T
EPI_ISL_451971	241	C	T	241	29903	5'UTR	241	extragenic		5'UTR:241	C241T
EPI_ISL_451971	3037	C	T	3037	29903	NSP3	F106F	SNP_silent	Predicted phosphoesterase, papain-like proteinase	NSP3:F106F	C3037T
EPI_ISL_451971	8072	A	G	8072	29903	NSP3	N1785D	SNP	Predicted phosphoesterase, papain-like proteinase	NSP3:N1785D	A8072G
EPI_ISL_451971	14408	C	T	14408	29903	NSP12b	P314L	SNP	RNA-dependent RNA polymerase, post-ribosomal frameshift	NSP12b:P314L	C14408T
EPI_ISL_451971	23403	A	G	23403	29903	S	D614G	SNP	Spike	S:D614G	A23403G
EPI_ISL_451971	28881	GGG	AAC	28881	29903	N	RG203KR	SNP	Nucleocapsid protein	N:RG203KR	GGG28881AAC
EPI_ISL_451973	19	C	T	19	29903	5'UTR	19	extragenic		5'UTR:19	C19T
EPI_ISL_451973	106	C	T	106	29903	5'UTR	106	extragenic		5'UTR:106	C106T
EPI_ISL_451973	241	C	T	241	29903	5'UTR	241	extragenic		5'UTR:241	C241T
EPI_ISL_451973	3037	C	T	3037	29903	NSP3	F106F	SNP_silent	Predicted phosphoesterase, papain-like proteinase	NSP3:F106F	C3037T
EPI_ISL_451973	8025	C	T	8025	29903	NSP3	A1769V	SNP	Predicted phosphoesterase, papain-like proteinase	NSP3:A1769V	C8025T
EPI_ISL_451973	8072	A	G	8072	29903	NSP3	N1785D	SNP	Predicted phosphoesterase, papain-like proteinase	NSP3:N1785D	A8072G
EPI_ISL_451973	14408	C	T	14408	29903	NSP12b	P314L	SNP	RNA-dependent RNA polymerase, post-ribosomal frameshift	NSP12b:P314L	C14408T
EPI_ISL_451973	23403	A	G	23403	29903	S	D614G	SNP	Spike	S:D614G	A23403G
EPI_ISL_451973	28881	GGG	AAC	28881	29903	N	RG203KR	SNP	Nucleocapsid protein	N:RG203KR	GGG28881AAC
EPI_ISL_451975	19	C	T	19	29903	5'UTR	19	extragenic		5'UTR:19	C19T
EPI_ISL_451975	106	C	T	106	29903	5'UTR	106	extragenic		5'UTR:106	C106T
EPI_ISL_451975	241	C	T	241	29903	5'UTR	241	extragenic		5'UTR:241	C241T
EPI_ISL_451975	3037	C	T	3037	29903	NSP3	F106F	SNP_silent	Predicted phosphoesterase, papain-like proteinase	NSP3:F106F	C3037T
EPI_ISL_451975	8072	A	G	8072	29903	NSP3	N1785D	SNP	Predicted phosphoesterase, papain-like proteinase	NSP3:N1785D	A8072G
EPI_ISL_451975	14408	C	T	14408	29903	NSP12b	P314L	SNP	RNA-dependent RNA polymerase, post-ribosomal frameshift	NSP12b:P314L	C14408T
EPI_ISL_451975	23403	A	G	23403	29903	S	D614G	SNP	Spike	S:D614G	A23403G
EPI_ISL_451975	28881	GGG	AAC	28881	29903	N	RG203KR	SNP	Nucleocapsid protein	N:RG203KR	GGG28881AAC
EPI_ISL_451980	19	C	T	19	29903	5'UTR	19	extragenic		5'UTR:19	C19T
EPI_ISL_451980	106	C	T	106	29903	5'UTR	106	extragenic		5'UTR:106	C106T
EPI_ISL_451980	241	C	T	241	29903	5'UTR	241	extragenic		5'UTR:241	C241T
EPI_ISL_451980	3037	C	T	3037	29903	NSP3	F106F	SNP_silent	Predicted phosphoesterase, papain-like proteinase	NSP3:F106F	C3037T
EPI_ISL_451980	8072	A	G	8072	29903	NSP3	N1785D	SNP	Predicted phosphoesterase, papain-like proteinase	NSP3:N1785D	A8072G
EPI_ISL_451980	14408	C	T	14408	29903	NSP12b	P314L	SNP	RNA-dependent RNA polymerase, post-ribosomal frameshift	NSP12b:P314L	C14408T
EPI_ISL_451980	23403	A	G	23403	29903	S	D614G	SNP	Spike	S:D614G	A23403G
EPI_ISL_451980	28881	GGG	AAC	28881	29903	N	RG203KR	SNP	Nucleocapsid protein	N:RG203KR	GGG28881AAC
EPI_ISL_451982	19	C	T	19	29903	5'UTR	19	extragenic		5'UTR:19	C19T
EPI_ISL_451982	106	C	T	106	29903	5'UTR	106	extragenic		5'UTR:106	C106T
EPI_ISL_451982	241	C	T	241	29903	5'UTR	241	extragenic		5'UTR:241	C241T
EPI_ISL_451982	3037	C	T	3037	29903	NSP3	F106F	SNP_silent	Predicted phosphoesterase, papain-like proteinase	NSP3:F106F	C3037T
EPI_ISL_451982	8072	A	G	8072	29903	NSP3	N1785D	SNP	Predicted phosphoesterase, papain-like proteinase	NSP3:N1785D	A8072G
EPI_ISL_451982	14408	C	T	14408	29903	NSP12b	P314L	SNP	RNA-dependent RNA polymerase, post-ribosomal frameshift	NSP12b:P314L	C14408T
EPI_ISL_451982	23403	A	G	23403	29903	S	D614G	SNP	Spike	S:D614G	A23403G
EPI_ISL_451982	28881	GGG	AAC	28881	29903	N	RG203KR	SNP	Nucleocapsid protein	N:RG203KR	GGG28881AAC
EPI_ISL_451984	19	C	T	19	29903	5'UTR	19	extragenic		5'UTR:19	C19T
EPI_ISL_451984	106	C	T	106	29903	5'UTR	106	extragenic		5'UTR:106	C106T
EPI_ISL_451984	241	C	T	241	29903	5'UTR	241	extragenic		5'UTR:241	C241T
EPI_ISL_451984	3037	C	T	3037	29903	NSP3	F106F	SNP_silent	Predicted phosphoesterase, papain-like proteinase	NSP3:F106F	C3037T
EPI_ISL_451984	8072	A	G	8072	29903	NSP3	N1785D	SNP	Predicted phosphoesterase, papain-like proteinase	NSP3:N1785D	A8072G
EPI_ISL_451984	14408	C	T	14408	29903	NSP12b	P314L	SNP	RNA-dependent RNA polymerase, post-ribosomal frameshift	NSP12b:P314L	C14408T
EPI_ISL_451984	23403	A	G	23403	29903	S	D614G	SNP	Spike	S:D614G	A23403G
EPI_ISL_451984	28005	C	T	28005	29903	ORF8	P38S	SNP	ORF8 protein	ORF8:P38S	C28005T
EPI_ISL_451984	28881	GGG	AAC	28881	29903	N	RG203KR	SNP	Nucleocapsid protein	N:RG203KR	GGG28881AAC
EPI_ISL_451985	19	C	T	19	29903	5'UTR	19	extragenic		5'UTR:19	C19T
EPI_ISL_451985	106	C	T	106	29903	5'UTR	106	extragenic		5'UTR:106	C106T
EPI_ISL_451985	241	C	T	241	29903	5'UTR	241	extragenic		5'UTR:241	C241T
EPI_ISL_451985	3037	C	T	3037	29903	NSP3	F106F	SNP_silent	Predicted phosphoesterase, papain-like proteinase	NSP3:F106F	C3037T
EPI_ISL_451985	8072	A	G	8072	29903	NSP3	N1785D	SNP	Predicted phosphoesterase, papain-like proteinase	NSP3:N1785D	A8072G
EPI_ISL_451985	14408	C	T	14408	29903	NSP12b	P314L	SNP	RNA-dependent RNA polymerase, post-ribosomal frameshift	NSP12b:P314L	C14408T
EPI_ISL_451985	20801	C	T	20801	29903	NSP16	T48I	SNP	2'-O-ribose methyltransferase	NSP16:T48I	C20801T
EPI_ISL_451985	23403	A	G	23403	29903	S	D614G	SNP	Spike	S:D614G	A23403G
EPI_ISL_451985	28881	GGG	AAC	28881	29903	N	RG203KR	SNP	Nucleocapsid protein	N:RG203KR	GGG28881AAC
EPI_ISL_451986	19	C	T	19	29903	5'UTR	19	extragenic		5'UTR:19	C19T
EPI_ISL_451986	106	C	T	106	29903	5'UTR	106	extragenic		5'UTR:106	C106T
EPI_ISL_451986	241	C	T	241	29903	5'UTR	241	extragenic		5'UTR:241	C241T
EPI_ISL_451986	3037	C	T	3037	29903	NSP3	F106F	SNP_silent	Predicted phosphoesterase, papain-like proteinase	NSP3:F106F	C3037T
EPI_ISL_451986	8072	A	G	8072	29903	NSP3	N1785D	SNP	Predicted phosphoesterase, papain-like proteinase	NSP3:N1785D	A8072G
EPI_ISL_451986	14408	C	T	14408	29903	NSP12b	P314L	SNP	RNA-dependent RNA polymerase, post-ribosomal frameshift	NSP12b:P314L	C14408T
EPI_ISL_451986	20801	C	T	20801	29903	NSP16	T48I	SNP	2'-O-ribose methyltransferase	NSP16:T48I	C20801T
EPI_ISL_451986	23403	A	G	23403	29903	S	D614G	SNP	Spike	S:D614G	A23403G
EPI_ISL_451986	28881	GGG	AAC	28881	29903	N	RG203KR	SNP	Nucleocapsid protein	N:RG203KR	GGG28881AAC
EPI_ISL_455441	19	C	T	19	29903	5'UTR	19	extragenic		5'UTR:19	C19T
EPI_ISL_455441	106	C	T	106	29903	5'UTR	106	extragenic		5'UTR:106	C106T
EPI_ISL_455441	241	C	T	241	29903	5'UTR	241	extragenic		5'UTR:241	C241T
EPI_ISL_455441	3037	C	T	3037	29903	NSP3	F106F	SNP_silent	Predicted phosphoesterase, papain-like proteinase	NSP3:F106F	C3037T
EPI_ISL_455441	8072	A	G	8072	29903	NSP3	N1785D	SNP	Predicted phosphoesterase, papain-like proteinase	NSP3:N1785D	A8072G
EPI_ISL_455441	14408	C	T	14408	29903	NSP12b	P314L	SNP	RNA-dependent RNA polymerase, post-ribosomal frameshift	NSP12b:P314L	C14408T
EPI_ISL_455441	23403	A	G	23403	29903	S	D614G	SNP	Spike	S:D614G	A23403G
EPI_ISL_455441	28881	GGG	AAC	28881	29903	N	RG203KR	SNP	Nucleocapsid protein	N:RG203KR	GGG28881AAC
EPI_ISL_455443	19	C	T	19	29903	5'UTR	19	extragenic		5'UTR:19	C19T
EPI_ISL_455443	106	C	T	106	29903	5'UTR	106	extragenic		5'UTR:106	C106T
EPI_ISL_455443	241	C	T	241	29903	5'UTR	241	extragenic		5'UTR:241	C241T
EPI_ISL_455443	3037	C	T	3037	29903	NSP3	F106F	SNP_silent	Predicted phosphoesterase, papain-like proteinase	NSP3:F106F	C3037T
EPI_ISL_455443	8072	A	G	8072	29903	NSP3	N1785D	SNP	Predicted phosphoesterase, papain-like proteinase	NSP3:N1785D	A8072G
EPI_ISL_455443	14408	C	T	14408	29903	NSP12b	P314L	SNP	RNA-dependent RNA polymerase, post-ribosomal frameshift	NSP12b:P314L	C14408T
EPI_ISL_455443	20801	C	T	20801	29903	NSP16	T48I	SNP	2'-O-ribose methyltransferase	NSP16:T48I	C20801T
EPI_ISL_455443	23403	A	G	23403	29903	S	D614G	SNP	Spike	S:D614G	A23403G
EPI_ISL_455443	28881	GGG	AAC	28881	29903	N	RG203KR	SNP	Nucleocapsid protein	N:RG203KR	GGG28881AAC
EPI_ISL_455448	19	C	T	19	29903	5'UTR	19	extragenic		5'UTR:19	C19T
EPI_ISL_455448	106	C	T	106	29903	5'UTR	106	extragenic		5'UTR:106	C106T
EPI_ISL_455448	241	C	T	241	29903	5'UTR	241	extragenic		5'UTR:241	C241T
EPI_ISL_455448	3037	C	T	3037	29903	NSP3	F106F	SNP_silent	Predicted phosphoesterase, papain-like proteinase	NSP3:F106F	C3037T
EPI_ISL_455448	8072	A	G	8072	29903	NSP3	N1785D	SNP	Predicted phosphoesterase, papain-like proteinase	NSP3:N1785D	A8072G
EPI_ISL_455448	14408	C	T	14408	29903	NSP12b	P314L	SNP	RNA-dependent RNA polymerase, post-ribosomal frameshift	NSP12b:P314L	C14408T
EPI_ISL_455448	20801	C	T	20801	29903	NSP16	T48I	SNP	2'-O-ribose methyltransferase	NSP16:T48I	C20801T
EPI_ISL_455448	23403	A	G	23403	29903	S	D614G	SNP	Spike	S:D614G	A23403G
EPI_ISL_455448	28881	GGG	AAC	28881	29903	N	RG203KR	SNP	Nucleocapsid protein	N:RG203KR	GGG28881AAC
EPI_ISL_466017	20	C	T	20	29900	5'UTR	20	extragenic		5'UTR:20	C20T
EPI_ISL_466017	1605	ATG	.	1604	29900	NSP2	D268	deletion	Non-Structural protein 2	NSP2:D268	ATG1605.
EPI_ISL_467554	20	C	T	8	29854	5'UTR	20	extragenic		5'UTR:20	C20T
EPI_ISL_467554	241	C	T	229	29854	5'UTR	241	extragenic		5'UTR:241	C241T
EPI_ISL_467554	3037	C	T	3025	29854	NSP3	F106F	SNP_silent	Predicted phosphoesterase, papain-like proteinase	NSP3:F106F	C3037T
EPI_ISL_467554	4148	G	T	4136	29854	NSP3	V477F	SNP	Predicted phosphoesterase, papain-like proteinase	NSP3:V477F	G4148T
EPI_ISL_467554	14408	C	T	14396	29854	NSP12b	P314L	SNP	RNA-dependent RNA polymerase, post-ribosomal frameshift	NSP12b:P314L	C14408T
EPI_ISL_467554	18877	C	T	18865	29854	NSP14	C279C	SNP_silent	3'-to-5' exonuclease	NSP14:C279C	C18877T
EPI_ISL_467554	20465	A	G	20453	29854	NSP15	D282G	SNP	endoRNAse	NSP15:D282G	A20465G
EPI_ISL_467554	23403	A	G	23391	29854	S	D614G	SNP	Spike	S:D614G	A23403G
EPI_ISL_467554	25563	G	T	25551	29854	ORF3a	Q57H	SNP	ORF3a protein	ORF3a:Q57H	G25563T
EPI_ISL_413559	21	C	T	21	29903	5'UTR	21	extragenic		5'UTR:21	C21T
EPI_ISL_413559	9924	C	T	9924	29903	NSP4	A457V	SNP	Transmembrane protein	NSP4:A457V	C9924T
EPI_ISL_413559	9951	C	T	9951	29903	NSP4	A466V	SNP	Transmembrane protein	NSP4:A466V	C9951T
EPI_ISL_417280	21	C	T	21	29903	5'UTR	21	extragenic		5'UTR:21	C21T
EPI_ISL_417280	1515	A	G	1515	29903	NSP2	H237R	SNP	Non-Structural protein 2	NSP2:H237R	A1515G
EPI_ISL_417280	9223	C	T	9223	29903	NSP4	H223H	SNP_silent	Transmembrane protein	NSP4:H223H	C9223T
EPI_ISL_417280	11083	G	T	11083	29903	NSP6	L37F	SNP	Transmembrane protein	NSP6:L37F	G11083T
EPI_ISL_417280	14805	C	T	14805	29903	NSP12b	Y446Y	SNP_silent	RNA-dependent RNA polymerase, post-ribosomal frameshift	NSP12b:Y446Y	C14805T
EPI_ISL_417280	17247	T	C	17247	29903	NSP13	R337R	SNP_silent	Helicase	NSP13:R337R	T17247C
EPI_ISL_417280	26144	G	T	26144	29903	ORF3a	G251V	SNP	ORF3a protein	ORF3a:G251V	G26144T
EPI_ISL_419757	21	C	T	20	29902	5'UTR	21	extragenic		5'UTR:21	C21T
EPI_ISL_419757	241	C	T	240	29902	5'UTR	241	extragenic		5'UTR:241	C241T
EPI_ISL_419757	1059	C	T	1058	29902	NSP2	T85I	SNP	Non-Structural protein 2	NSP2:T85I	C1059T
EPI_ISL_419757	3037	C	T	3036	29902	NSP3	F106F	SNP_silent	Predicted phosphoesterase, papain-like proteinase	NSP3:F106F	C3037T
EPI_ISL_419757	4015	A	G	4014	29902	NSP3	T432T	SNP_silent	Predicted phosphoesterase, papain-like proteinase	NSP3:T432T	A4015G
EPI_ISL_419757	4951	G	A	4950	29902	NSP3	L744L	SNP_silent	Predicted phosphoesterase, papain-like proteinase	NSP3:L744L	G4951A
EPI_ISL_419757	14408	C	T	14407	29902	NSP12b	P314L	SNP	RNA-dependent RNA polymerase, post-ribosomal frameshift	NSP12b:P314L	C14408T
EPI_ISL_419757	23403	A	G	23402	29902	S	D614G	SNP	Spike	S:D614G	A23403G
EPI_ISL_419757	25563	G	T	25562	29902	ORF3a	Q57H	SNP	ORF3a protein	ORF3a:Q57H	G25563T
EPI_ISL_419772	21	C	T	17	29899	5'UTR	21	extragenic		5'UTR:21	C21T
EPI_ISL_419772	7007	G	A	7003	29899	NSP3	A1430T	SNP	Predicted phosphoesterase, papain-like proteinase	NSP3:A1430T	G7007A
EPI_ISL_419772	8782	C	T	8778	29899	NSP4	S76S	SNP_silent	Transmembrane protein	NSP4:S76S	C8782T
EPI_ISL_419772	18180	G	A	18176	29899	NSP14	K47K	SNP_silent	3'-to-5' exonuclease	NSP14:K47K	G18180A
EPI_ISL_419772	26088	C	T	26084	29899	ORF3a	I232I	SNP_silent	ORF3a protein	ORF3a:I232I	C26088T
EPI_ISL_419772	28144	T	C	28140	29899	ORF8	L84S	SNP	ORF8 protein	ORF8:L84S	T28144C
EPI_ISL_419772	28868	C	A	28864	29899	N	P199T	SNP	Nucleocapsid protein	N:P199T	C28868A
EPI_ISL_421761	21	C	T	21	29860	5'UTR	21	extragenic		5'UTR:21	C21T
EPI_ISL_421761	241	C	T	241	29860	5'UTR	241	extragenic		5'UTR:241	C241T
EPI_ISL_421761	1059	C	T	1059	29860	NSP2	T85I	SNP	Non-Structural protein 2	NSP2:T85I	C1059T
EPI_ISL_421761	3037	C	T	3037	29860	NSP3	F106F	SNP_silent	Predicted phosphoesterase, papain-like proteinase	NSP3:F106F	C3037T
EPI_ISL_421761	11464	G	A	11464	29860	NSP6	M164I	SNP	Transmembrane protein	NSP6:M164I	G11464A
EPI_ISL_421761	14408	C	T	14408	29860	NSP12b	P314L	SNP	RNA-dependent RNA polymerase, post-ribosomal frameshift	NSP12b:P314L	C14408T
EPI_ISL_421761	23403	A	G	23403	29860	S	D614G	SNP	Spike	S:D614G	A23403G
EPI_ISL_421761	25563	G	T	25563	29860	ORF3a	Q57H	SNP	ORF3a protein	ORF3a:Q57H	G25563T
EPI_ISL_421792	21	C	T	21	29903	5'UTR	21	extragenic		5'UTR:21	C21T
EPI_ISL_421792	241	C	T	241	29903	5'UTR	241	extragenic		5'UTR:241	C241T
EPI_ISL_421792	3037	C	T	3037	29903	NSP3	F106F	SNP_silent	Predicted phosphoesterase, papain-like proteinase	NSP3:F106F	C3037T
EPI_ISL_421792	14408	C	T	14408	29903	NSP12b	P314L	SNP	RNA-dependent RNA polymerase, post-ribosomal frameshift	NSP12b:P314L	C14408T
EPI_ISL_421792	23403	A	G	23403	29903	S	D614G	SNP	Spike	S:D614G	A23403G
EPI_ISL_421792	28881	GGG	AAC	28881	29903	N	RG203KR	SNP	Nucleocapsid protein	N:RG203KR	GGG28881AAC
EPI_ISL_423472	21	C	T	21	29903	5'UTR	21	extragenic		5'UTR:21	C21T
EPI_ISL_423472	241	C	T	241	29903	5'UTR	241	extragenic		5'UTR:241	C241T
EPI_ISL_423472	3037	C	T	3037	29903	NSP3	F106F	SNP_silent	Predicted phosphoesterase, papain-like proteinase	NSP3:F106F	C3037T
EPI_ISL_423472	4002	C	T	4002	29903	NSP3	T428I	SNP	Predicted phosphoesterase, papain-like proteinase	NSP3:T428I	C4002T
EPI_ISL_423472	10097	G	A	10097	29903	NSP5	G15S	SNP	3C-like proteinase	NSP5:G15S	G10097A
EPI_ISL_423472	13536	C	T	13536	29903	NSP12b	Y23Y	SNP_silent	RNA-dependent RNA polymerase, post-ribosomal frameshift	NSP12b:Y23Y	C13536T
EPI_ISL_423472	14184	C	T	14184	29903	NSP12b	T239T	SNP_silent	RNA-dependent RNA polymerase, post-ribosomal frameshift	NSP12b:T239T	C14184T
EPI_ISL_423472	14408	C	T	14408	29903	NSP12b	P314L	SNP	RNA-dependent RNA polymerase, post-ribosomal frameshift	NSP12b:P314L	C14408T
EPI_ISL_423472	21058	C	T	21058	29903	NSP16	P134S	SNP	2'-O-ribose methyltransferase	NSP16:P134S	C21058T
EPI_ISL_423472	23403	A	G	23403	29903	S	D614G	SNP	Spike	S:D614G	A23403G
EPI_ISL_423472	23731	C	T	23731	29903	S	T723T	SNP_silent	Spike	S:T723T	C23731T
EPI_ISL_423472	28881	GGG	AAC	28881	29903	N	RG203KR	SNP	Nucleocapsid protein	N:RG203KR	GGG28881AAC
EPI_ISL_423623	21	C	T	21	29903	5'UTR	21	extragenic		5'UTR:21	C21T
EPI_ISL_423623	1515	A	G	1515	29903	NSP2	H237R	SNP	Non-Structural protein 2	NSP2:H237R	A1515G
EPI_ISL_423623	7675	G	T	7675	29903	NSP3	A1652A	SNP_silent	Predicted phosphoesterase, papain-like proteinase	NSP3:A1652A	G7675T
EPI_ISL_423623	9223	C	T	9223	29903	NSP4	H223H	SNP_silent	Transmembrane protein	NSP4:H223H	C9223T
EPI_ISL_423623	11083	G	T	11083	29903	NSP6	L37F	SNP	Transmembrane protein	NSP6:L37F	G11083T
EPI_ISL_423623	14805	C	T	14805	29903	NSP12b	Y446Y	SNP_silent	RNA-dependent RNA polymerase, post-ribosomal frameshift	NSP12b:Y446Y	C14805T
EPI_ISL_423623	17247	T	C	17247	29903	NSP13	R337R	SNP_silent	Helicase	NSP13:R337R	T17247C
EPI_ISL_423623	26144	G	T	26144	29903	ORF3a	G251V	SNP	ORF3a protein	ORF3a:G251V	G26144T
EPI_ISL_423623	29347	C	T	29347	29903	N	D358D	SNP_silent	Nucleocapsid protein	N:D358D	C29347T
EPI_ISL_423772	21	C	T	21	29903	5'UTR	21	extragenic		5'UTR:21	C21T
EPI_ISL_423772	241	C	T	241	29903	5'UTR	241	extragenic		5'UTR:241	C241T
EPI_ISL_423772	313	C	T	313	29903	NSP1	L16L	SNP_silent	Leader protein	NSP1:L16L	C313T
EPI_ISL_423772	3037	C	T	3037	29903	NSP3	F106F	SNP_silent	Predicted phosphoesterase, papain-like proteinase	NSP3:F106F	C3037T
EPI_ISL_423772	10105	G	T	10105	29903	NSP5	M17I	SNP	3C-like proteinase	NSP5:M17I	G10105T
EPI_ISL_423772	11221	G	T	11221	29903	NSP6	M83I	SNP	Transmembrane protein	NSP6:M83I	G11221T
EPI_ISL_423772	14408	C	T	14408	29903	NSP12b	P314L	SNP	RNA-dependent RNA polymerase, post-ribosomal frameshift	NSP12b:P314L	C14408T
EPI_ISL_423772	23403	A	G	23403	29903	S	D614G	SNP	Spike	S:D614G	A23403G
EPI_ISL_423772	25904	C	T	25904	29903	ORF3a	S171L	SNP	ORF3a protein	ORF3a:S171L	C25904T
EPI_ISL_423772	28881	GGG	AAC	28881	29903	N	RG203KR	SNP	Nucleocapsid protein	N:RG203KR	GGG28881AAC
EPI_ISL_430338	21	C	T	21	29902	5'UTR	21	extragenic		5'UTR:21	C21T
EPI_ISL_430338	241	C	T	241	29902	5'UTR	241	extragenic		5'UTR:241	C241T
EPI_ISL_430338	1059	C	T	1059	29902	NSP2	T85I	SNP	Non-Structural protein 2	NSP2:T85I	C1059T
EPI_ISL_430338	3037	C	T	3037	29902	NSP3	F106F	SNP_silent	Predicted phosphoesterase, papain-like proteinase	NSP3:F106F	C3037T
EPI_ISL_430338	14408	C	T	14408	29902	NSP12b	P314L	SNP	RNA-dependent RNA polymerase, post-ribosomal frameshift	NSP12b:P314L	C14408T
EPI_ISL_430338	21562	A	.	21561	29902	3'UTR	21562	extragenic		3'UTR:21562	A21562.
EPI_ISL_430338	23403	A	G	23402	29902	S	D614G	SNP	Spike	S:D614G	A23403G
EPI_ISL_430338	25563	G	T	25562	29902	ORF3a	Q57H	SNP	ORF3a protein	ORF3a:Q57H	G25563T
EPI_ISL_430338	25587	C	T	25586	29902	ORF3a	L65L	SNP_silent	ORF3a protein	ORF3a:L65L	C25587T
EPI_ISL_432388	21	C	T	12	29894	5'UTR	21	extragenic		5'UTR:21	C21T
EPI_ISL_432388	241	C	T	232	29894	5'UTR	241	extragenic		5'UTR:241	C241T
EPI_ISL_432388	3037	C	T	3028	29894	NSP3	F106F	SNP_silent	Predicted phosphoesterase, papain-like proteinase	NSP3:F106F	C3037T
EPI_ISL_432388	4467	C	T	4458	29894	NSP3	T583I	SNP	Predicted phosphoesterase, papain-like proteinase	NSP3:T583I	C4467T
EPI_ISL_432388	14408	C	T	14399	29894	NSP12b	P314L	SNP	RNA-dependent RNA polymerase, post-ribosomal frameshift	NSP12b:P314L	C14408T
EPI_ISL_432388	15380	G	T	15371	29894	NSP12b	S638I	SNP	RNA-dependent RNA polymerase, post-ribosomal frameshift	NSP12b:S638I	G15380T
EPI_ISL_432388	23403	A	G	23394	29894	S	D614G	SNP	Spike	S:D614G	A23403G
EPI_ISL_432388	28881	GGG	AAC	28872	29894	N	RG203KR	SNP	Nucleocapsid protein	N:RG203KR	GGG28881AAC
EPI_ISL_445809	21	C	T	19	29901	5'UTR	21	extragenic		5'UTR:21	C21T
EPI_ISL_445809	241	C	T	239	29901	5'UTR	241	extragenic		5'UTR:241	C241T
EPI_ISL_445809	3037	C	T	3035	29901	NSP3	F106F	SNP_silent	Predicted phosphoesterase, papain-like proteinase	NSP3:F106F	C3037T
EPI_ISL_445809	14408	C	T	14406	29901	NSP12b	P314L	SNP	RNA-dependent RNA polymerase, post-ribosomal frameshift	NSP12b:P314L	C14408T
EPI_ISL_445809	23403	A	G	23401	29901	S	D614G	SNP	Spike	S:D614G	A23403G
EPI_ISL_445809	28881	GGG	AAC	28879	29901	N	RG203KR	SNP	Nucleocapsid protein	N:RG203KR	GGG28881AAC
EPI_ISL_446914	21	C	T	21	29903	5'UTR	21	extragenic		5'UTR:21	C21T
EPI_ISL_446914	1440	G	A	1440	29903	NSP2	G212D	SNP	Non-Structural protein 2	NSP2:G212D	G1440A
EPI_ISL_446914	2891	G	A	2891	29903	NSP3	A58T	SNP	Predicted phosphoesterase, papain-like proteinase	NSP3:A58T	G2891A
EPI_ISL_446914	9723	T	G	9723	29903	NSP4	F390C	SNP	Transmembrane protein	NSP4:F390C	T9723G
EPI_ISL_446914	16207	G	T	16207	29903	NSP12b	A914S	SNP	RNA-dependent RNA polymerase, post-ribosomal frameshift	NSP12b:A914S	G16207T
EPI_ISL_446914	25339	C	T	25339	29903	S	D1259D	SNP_silent	Spike	S:D1259D	C25339T
EPI_ISL_446914	28851	G	T	28851	29903	N	S193I	SNP	Nucleocapsid protein	N:S193I	G28851T
EPI_ISL_448775	21	C	T	21	29903	5'UTR	21	extragenic		5'UTR:21	C21T
EPI_ISL_448775	241	C	T	241	29903	5'UTR	241	extragenic		5'UTR:241	C241T
EPI_ISL_448775	3037	C	T	3037	29903	NSP3	F106F	SNP_silent	Predicted phosphoesterase, papain-like proteinase	NSP3:F106F	C3037T
EPI_ISL_448775	3875	G	A	3875	29903	NSP3	A386T	SNP	Predicted phosphoesterase, papain-like proteinase	NSP3:A386T	G3875A
EPI_ISL_448775	14408	C	T	14408	29903	NSP12b	P314L	SNP	RNA-dependent RNA polymerase, post-ribosomal frameshift	NSP12b:P314L	C14408T
EPI_ISL_448775	23403	A	G	23403	29903	S	D614G	SNP	Spike	S:D614G	A23403G
EPI_ISL_448775	29272	C	T	29272	29903	N	Y333Y	SNP_silent	Nucleocapsid protein	N:Y333Y	C29272T
EPI_ISL_448775	29734	G	C	29734	29903	3'UTR	29734	extragenic		3'UTR:29734	G29734C
EPI_ISL_450192	21	C	T	21	29860	5'UTR	21	extragenic		5'UTR:21	C21T
EPI_ISL_450192	241	C	T	241	29860	5'UTR	241	extragenic		5'UTR:241	C241T
EPI_ISL_450192	658	T	C	658	29860	NSP1	A131A	SNP_silent	Leader protein	NSP1:A131A	T658C
EPI_ISL_450192	1473	C	T	1473	29860	NSP2	T223I	SNP	Non-Structural protein 2	NSP2:T223I	C1473T
EPI_ISL_450192	3037	C	T	3037	29860	NSP3	F106F	SNP_silent	Predicted phosphoesterase, papain-like proteinase	NSP3:F106F	C3037T
EPI_ISL_450192	13124	G	A	13124	29860	NSP10	G34R	SNP	Growth-factor-like protein	NSP10:G34R	G13124A
EPI_ISL_450192	14408	C	T	14408	29860	NSP12b	P314L	SNP	RNA-dependent RNA polymerase, post-ribosomal frameshift	NSP12b:P314L	C14408T
EPI_ISL_450192	23403	A	G	23403	29860	S	D614G	SNP	Spike	S:D614G	A23403G
EPI_ISL_450192	28881	GGG	AAC	28881	29860	N	RG203KR	SNP	Nucleocapsid protein	N:RG203KR	GGG28881AAC
EPI_ISL_450192	29473	G	A	29473	29860	N	L400L	SNP_silent	Nucleocapsid protein	N:L400L	G29473A
EPI_ISL_450192	29724	CATTTTCACCGAGGCCACGCGGAGTACGATCGAGTGTACAGTG	.	29723	29860	3'UTR	29724	extragenic		3'UTR:29724	CATTTTCACCGAGGCCACGCGGAGTACGATCGAGTGTACAGTG29724.
EPI_ISL_462398	21	C	T	21	29891	5'UTR	21	extragenic		5'UTR:21	C21T
EPI_ISL_462398	2470	C	T	2470	29891	NSP2	A555A	SNP_silent	Non-Structural protein 2	NSP2:A555A	C2470T
EPI_ISL_462398	11083	G	T	11083	29891	NSP6	L37F	SNP	Transmembrane protein	NSP6:L37F	G11083T
EPI_ISL_462398	14805	C	T	14805	29891	NSP12b	Y446Y	SNP_silent	RNA-dependent RNA polymerase, post-ribosomal frameshift	NSP12b:Y446Y	C14805T
EPI_ISL_462398	17247	T	C	17247	29891	NSP13	R337R	SNP_silent	Helicase	NSP13:R337R	T17247C
EPI_ISL_462398	21789	C	T	21789	29891	S	T76I	SNP	Spike	S:T76I	C21789T
EPI_ISL_462398	26144	G	T	26144	29891	ORF3a	G251V	SNP	ORF3a protein	ORF3a:G251V	G26144T
EPI_ISL_464989	21	C	T	21	29906	5'UTR	21	extragenic		5'UTR:21	C21T
EPI_ISL_464989	1515	A	G	1515	29906	NSP2	H237R	SNP	Non-Structural protein 2	NSP2:H237R	A1515G
EPI_ISL_464989	9223	C	T	9223	29906	NSP4	H223H	SNP_silent	Transmembrane protein	NSP4:H223H	C9223T
EPI_ISL_464989	11081	.	TTT	11082	29906	NSP6	F37	insertion	Transmembrane protein	NSP6:F37	.11081TTT
EPI_ISL_464989	11083	G	T	11086	29906	NSP6	L37F	SNP	Transmembrane protein	NSP6:L37F	G11083T
EPI_ISL_464989	14805	C	T	14808	29906	NSP12b	Y446Y	SNP_silent	RNA-dependent RNA polymerase, post-ribosomal frameshift	NSP12b:Y446Y	C14805T
EPI_ISL_464989	17247	T	C	17250	29906	NSP13	R337R	SNP_silent	Helicase	NSP13:R337R	T17247C
EPI_ISL_464989	17626	C	T	17629	29906	NSP13	H464Y	SNP	Helicase	NSP13:H464Y	C17626T
EPI_ISL_464989	26144	G	T	26147	29906	ORF3a	G251V	SNP	ORF3a protein	ORF3a:G251V	G26144T
EPI_ISL_465060	21	C	T	21	29903	5'UTR	21	extragenic		5'UTR:21	C21T
EPI_ISL_465060	1515	A	G	1515	29903	NSP2	H237R	SNP	Non-Structural protein 2	NSP2:H237R	A1515G
EPI_ISL_465060	7675	G	T	7675	29903	NSP3	A1652A	SNP_silent	Predicted phosphoesterase, papain-like proteinase	NSP3:A1652A	G7675T
EPI_ISL_465060	9223	C	T	9223	29903	NSP4	H223H	SNP_silent	Transmembrane protein	NSP4:H223H	C9223T
EPI_ISL_465060	11083	G	T	11083	29903	NSP6	L37F	SNP	Transmembrane protein	NSP6:L37F	G11083T
EPI_ISL_465060	14805	C	T	14805	29903	NSP12b	Y446Y	SNP_silent	RNA-dependent RNA polymerase, post-ribosomal frameshift	NSP12b:Y446Y	C14805T
EPI_ISL_465060	17247	T	C	17247	29903	NSP13	R337R	SNP_silent	Helicase	NSP13:R337R	T17247C
EPI_ISL_465060	26144	G	T	26144	29903	ORF3a	G251V	SNP	ORF3a protein	ORF3a:G251V	G26144T
EPI_ISL_465155	21	C	T	21	29906	5'UTR	21	extragenic		5'UTR:21	C21T
EPI_ISL_465155	1515	A	G	1515	29906	NSP2	H237R	SNP	Non-Structural protein 2	NSP2:H237R	A1515G
EPI_ISL_465155	9223	C	T	9223	29906	NSP4	H223H	SNP_silent	Transmembrane protein	NSP4:H223H	C9223T
EPI_ISL_465155	11081	.	TTT	11082	29906	NSP6	F37	insertion	Transmembrane protein	NSP6:F37	.11081TTT
EPI_ISL_465155	11083	G	T	11086	29906	NSP6	L37F	SNP	Transmembrane protein	NSP6:L37F	G11083T
EPI_ISL_465155	14805	C	T	14808	29906	NSP12b	Y446Y	SNP_silent	RNA-dependent RNA polymerase, post-ribosomal frameshift	NSP12b:Y446Y	C14805T
EPI_ISL_465155	17247	T	C	17250	29906	NSP13	R337R	SNP_silent	Helicase	NSP13:R337R	T17247C
EPI_ISL_465155	17626	C	T	17629	29906	NSP13	H464Y	SNP	Helicase	NSP13:H464Y	C17626T
EPI_ISL_465155	26144	G	T	26147	29906	ORF3a	G251V	SNP	ORF3a protein	ORF3a:G251V	G26144T
EPI_ISL_465315	21	C	T	21	29903	5'UTR	21	extragenic		5'UTR:21	C21T
EPI_ISL_465315	241	C	T	241	29903	5'UTR	241	extragenic		5'UTR:241	C241T
EPI_ISL_465315	3037	C	T	3037	29903	NSP3	F106F	SNP_silent	Predicted phosphoesterase, papain-like proteinase	NSP3:F106F	C3037T
EPI_ISL_465315	14408	C	T	14408	29903	NSP12b	P314L	SNP	RNA-dependent RNA polymerase, post-ribosomal frameshift	NSP12b:P314L	C14408T
EPI_ISL_465315	22405	A	G	22405	29903	S	E281E	SNP_silent	Spike	S:E281E	A22405G
EPI_ISL_465315	23403	A	G	23403	29903	S	D614G	SNP	Spike	S:D614G	A23403G
EPI_ISL_465315	25429	G	T	25429	29903	ORF3a	V13L	SNP	ORF3a protein	ORF3a:V13L	G25429T
EPI_ISL_465315	28253	C	T	28253	29903	ORF8	F120F	SNP_silent	ORF8 protein	ORF8:F120F	C28253T
EPI_ISL_465350	21	C	T	21	29903	5'UTR	21	extragenic		5'UTR:21	C21T
EPI_ISL_465350	1483	T	C	1483	29903	NSP2	F226F	SNP_silent	Non-Structural protein 2	NSP2:F226F	T1483C
EPI_ISL_465350	5927	G	A	5927	29903	NSP3	V1070I	SNP	Predicted phosphoesterase, papain-like proteinase	NSP3:V1070I	G5927A
EPI_ISL_465350	11083	G	T	11083	29903	NSP6	L37F	SNP	Transmembrane protein	NSP6:L37F	G11083T
EPI_ISL_465350	14805	C	T	14805	29903	NSP12b	Y446Y	SNP_silent	RNA-dependent RNA polymerase, post-ribosomal frameshift	NSP12b:Y446Y	C14805T
EPI_ISL_465350	23707	C	T	23707	29903	S	P715P	SNP_silent	Spike	S:P715P	C23707T
EPI_ISL_465350	24781	G	C	24781	29903	S	K1073N	SNP	Spike	S:K1073N	G24781C
EPI_ISL_465350	26144	G	T	26144	29903	ORF3a	G251V	SNP	ORF3a protein	ORF3a:G251V	G26144T
EPI_ISL_465350	28833	C	T	28833	29903	N	S187L	SNP	Nucleocapsid protein	N:S187L	C28833T
EPI_ISL_465438	21	C	T	21	29906	5'UTR	21	extragenic		5'UTR:21	C21T
EPI_ISL_465438	10885	T	C	10885	29906	NSP5	N277N	SNP_silent	3C-like proteinase	NSP5:N277N	T10885C
EPI_ISL_465438	11081	.	TTT	11082	29906	NSP6	F37	insertion	Transmembrane protein	NSP6:F37	.11081TTT
EPI_ISL_465438	11083	G	T	11086	29906	NSP6	L37F	SNP	Transmembrane protein	NSP6:L37F	G11083T
EPI_ISL_465438	14805	C	T	14808	29906	NSP12b	Y446Y	SNP_silent	RNA-dependent RNA polymerase, post-ribosomal frameshift	NSP12b:Y446Y	C14805T
EPI_ISL_465438	23707	C	T	23710	29906	S	P715P	SNP_silent	Spike	S:P715P	C23707T
EPI_ISL_465438	26144	G	T	26147	29906	ORF3a	G251V	SNP	ORF3a protein	ORF3a:G251V	G26144T
EPI_ISL_465438	28833	C	T	28836	29906	N	S187L	SNP	Nucleocapsid protein	N:S187L	C28833T
EPI_ISL_465449	21	C	T	21	29906	5'UTR	21	extragenic		5'UTR:21	C21T
EPI_ISL_465449	11081	.	TTT	11082	29906	NSP6	F37	insertion	Transmembrane protein	NSP6:F37	.11081TTT
EPI_ISL_465449	11083	G	T	11086	29906	NSP6	L37F	SNP	Transmembrane protein	NSP6:L37F	G11083T
EPI_ISL_465449	14805	C	T	14808	29906	NSP12b	Y446Y	SNP_silent	RNA-dependent RNA polymerase, post-ribosomal frameshift	NSP12b:Y446Y	C14805T
EPI_ISL_465449	15909	T	C	15912	29906	NSP12b	G814G	SNP_silent	RNA-dependent RNA polymerase, post-ribosomal frameshift	NSP12b:G814G	T15909C
EPI_ISL_465449	23707	C	T	23710	29906	S	P715P	SNP_silent	Spike	S:P715P	C23707T
EPI_ISL_465449	26144	G	T	26147	29906	ORF3a	G251V	SNP	ORF3a protein	ORF3a:G251V	G26144T
EPI_ISL_465449	28833	C	T	28836	29906	N	S187L	SNP	Nucleocapsid protein	N:S187L	C28833T
EPI_ISL_465543	21	C	G	21	29903	5'UTR	21	extragenic		5'UTR:21	C21G
EPI_ISL_465543	241	C	T	241	29903	5'UTR	241	extragenic		5'UTR:241	C241T
EPI_ISL_465543	3037	C	T	3037	29903	NSP3	F106F	SNP_silent	Predicted phosphoesterase, papain-like proteinase	NSP3:F106F	C3037T
EPI_ISL_465543	14408	C	T	14408	29903	NSP12b	P314L	SNP	RNA-dependent RNA polymerase, post-ribosomal frameshift	NSP12b:P314L	C14408T
EPI_ISL_465543	21624	G	T	21624	29903	S	R21I	SNP	Spike	S:R21I	G21624T
EPI_ISL_465543	23227	T	C	23227	29903	S	S555S	SNP_silent	Spike	S:S555S	T23227C
EPI_ISL_465543	23403	A	G	23403	29903	S	D614G	SNP	Spike	S:D614G	A23403G
EPI_ISL_465543	28881	GGG	AAC	28881	29903	N	RG203KR	SNP	Nucleocapsid protein	N:RG203KR	GGG28881AAC
EPI_ISL_465864	21	C	T	21	29903	5'UTR	21	extragenic		5'UTR:21	C21T
EPI_ISL_465864	598	G	T	598	29903	NSP1	V111V	SNP_silent	Leader protein	NSP1:V111V	G598T
EPI_ISL_465864	9928	G	T	9928	29903	NSP4	M458I	SNP	Transmembrane protein	NSP4:M458I	G9928T
EPI_ISL_465864	11083	G	T	11083	29903	NSP6	L37F	SNP	Transmembrane protein	NSP6:L37F	G11083T
EPI_ISL_465864	14568	T	C	14568	29903	NSP12b	A367A	SNP_silent	RNA-dependent RNA polymerase, post-ribosomal frameshift	NSP12b:A367A	T14568C
EPI_ISL_465864	14805	C	T	14805	29903	NSP12b	Y446Y	SNP_silent	RNA-dependent RNA polymerase, post-ribosomal frameshift	NSP12b:Y446Y	C14805T
EPI_ISL_465864	17247	T	C	17247	29903	NSP13	R337R	SNP_silent	Helicase	NSP13:R337R	T17247C
EPI_ISL_465864	17934	C	T	17934	29903	NSP13	T566T	SNP_silent	Helicase	NSP13:T566T	C17934T
EPI_ISL_465864	18652	C	T	18652	29903	NSP14	R205C	SNP	3'-to-5' exonuclease	NSP14:R205C	C18652T
EPI_ISL_465864	22093	G	C	22093	29903	S	M177I	SNP	Spike	S:M177I	G22093C
EPI_ISL_465864	26144	G	T	26144	29903	ORF3a	G251V	SNP	ORF3a protein	ORF3a:G251V	G26144T
EPI_ISL_466317	21	C	T	21	29903	5'UTR	21	extragenic		5'UTR:21	C21T
EPI_ISL_466317	241	C	T	241	29903	5'UTR	241	extragenic		5'UTR:241	C241T
EPI_ISL_466317	3037	C	T	3037	29903	NSP3	F106F	SNP_silent	Predicted phosphoesterase, papain-like proteinase	NSP3:F106F	C3037T
EPI_ISL_466317	14408	C	T	14408	29903	NSP12b	P314L	SNP	RNA-dependent RNA polymerase, post-ribosomal frameshift	NSP12b:P314L	C14408T
EPI_ISL_466317	23403	A	G	23403	29903	S	D614G	SNP	Spike	S:D614G	A23403G
EPI_ISL_466317	25350	C	T	25350	29903	S	P1263L	SNP	Spike	S:P1263L	C25350T
EPI_ISL_466317	25429	G	T	25429	29903	ORF3a	V13L	SNP	ORF3a protein	ORF3a:V13L	G25429T
EPI_ISL_470878	21	C	T	21	29903	5'UTR	21	extragenic		5'UTR:21	C21T
EPI_ISL_470878	6312	C	A	6312	29903	NSP3	T1198K	SNP	Predicted phosphoesterase, papain-like proteinase	NSP3:T1198K	C6312A
EPI_ISL_470878	9562	A	G	9562	29903	NSP4	S336S	SNP_silent	Transmembrane protein	NSP4:S336S	A9562G
EPI_ISL_470878	11074	C	T	11074	29903	NSP6	F34F	SNP_silent	Transmembrane protein	NSP6:F34F	C11074T
EPI_ISL_470878	11083	G	T	11083	29903	NSP6	L37F	SNP	Transmembrane protein	NSP6:L37F	G11083T
EPI_ISL_470878	11195	C	T	11195	29903	NSP6	L75F	SNP	Transmembrane protein	NSP6:L75F	C11195T
EPI_ISL_470878	13730	C	T	13730	29903	NSP12b	A88V	SNP	RNA-dependent RNA polymerase, post-ribosomal frameshift	NSP12b:A88V	C13730T
EPI_ISL_470878	14222	T	G	14222	29903	NSP12b	L252*	SNP_stop	RNA-dependent RNA polymerase, post-ribosomal frameshift	NSP12b:L252*	T14222G
EPI_ISL_470878	17338	G	T	17338	29903	NSP13	A368S	SNP	Helicase	NSP13:A368S	G17338T
EPI_ISL_470878	23929	C	T	23929	29903	S	Y789Y	SNP_silent	Spike	S:Y789Y	C23929T
EPI_ISL_470878	28311	C	T	28311	29903	N	P13L	SNP	Nucleocapsid protein	N:P13L	C28311T
EPI_ISL_470878	29870	C	A	29870	29903	3'UTR	29870	extragenic		3'UTR:29870	C29870A
EPI_ISL_472077	21	C	T	9	29891	5'UTR	21	extragenic		5'UTR:21	C21T
EPI_ISL_472077	241	C	T	229	29891	5'UTR	241	extragenic		5'UTR:241	C241T
EPI_ISL_472077	3037	C	T	3025	29891	NSP3	F106F	SNP_silent	Predicted phosphoesterase, papain-like proteinase	NSP3:F106F	C3037T
EPI_ISL_472077	10097	G	A	10085	29891	NSP5	G15S	SNP	3C-like proteinase	NSP5:G15S	G10097A
EPI_ISL_472077	11906	G	C	11894	29891	NSP7	V22L	SNP	Non-Structural Protein 7	NSP7:V22L	G11906C
EPI_ISL_472077	14408	C	T	14396	29891	NSP12b	P314L	SNP	RNA-dependent RNA polymerase, post-ribosomal frameshift	NSP12b:P314L	C14408T
EPI_ISL_472077	23403	A	G	23391	29891	S	D614G	SNP	Spike	S:D614G	A23403G
EPI_ISL_472077	23731	C	T	23719	29891	S	T723T	SNP_silent	Spike	S:T723T	C23731T
EPI_ISL_472077	28580	G	T	28568	29891	N	D103Y	SNP	Nucleocapsid protein	N:D103Y	G28580T
EPI_ISL_472077	28720	C	T	28708	29891	N	R149R	SNP_silent	Nucleocapsid protein	N:R149R	C28720T
EPI_ISL_472077	28881	GGG	AAC	28869	29891	N	RG203KR	SNP	Nucleocapsid protein	N:RG203KR	GGG28881AAC
EPI_ISL_472077	29421	C	T	29409	29891	N	P383L	SNP	Nucleocapsid protein	N:P383L	C29421T
EPI_ISL_473051	21	C	T	17	29899	5'UTR	21	extragenic		5'UTR:21	C21T
EPI_ISL_473051	241	C	T	237	29899	5'UTR	241	extragenic		5'UTR:241	C241T
EPI_ISL_473051	829	C	T	825	29899	NSP2	N8N	SNP_silent	Non-Structural protein 2	NSP2:N8N	C829T
EPI_ISL_473051	1059	C	T	1055	29899	NSP2	T85I	SNP	Non-Structural protein 2	NSP2:T85I	C1059T
EPI_ISL_473051	3037	C	T	3033	29899	NSP3	F106F	SNP_silent	Predicted phosphoesterase, papain-like proteinase	NSP3:F106F	C3037T
EPI_ISL_473051	14408	C	T	14404	29899	NSP12b	P314L	SNP	RNA-dependent RNA polymerase, post-ribosomal frameshift	NSP12b:P314L	C14408T
EPI_ISL_473051	23403	A	G	23399	29899	S	D614G	SNP	Spike	S:D614G	A23403G
EPI_ISL_473051	25563	G	T	25559	29899	ORF3a	Q57H	SNP	ORF3a protein	ORF3a:Q57H	G25563T
EPI_ISL_473051	27415	G	A	27411	29899	ORF7a	A8T	SNP	ORF7a protein	ORF7a:A8T	G27415A
EPI_ISL_473051	28371	G	T	28367	29899	N	S33I	SNP	Nucleocapsid protein	N:S33I	G28371T
EPI_ISL_473305	21	C	T	19	29901	5'UTR	21	extragenic		5'UTR:21	C21T
EPI_ISL_473305	241	C	T	239	29901	5'UTR	241	extragenic		5'UTR:241	C241T
EPI_ISL_473305	829	C	T	827	29901	NSP2	N8N	SNP_silent	Non-Structural protein 2	NSP2:N8N	C829T
EPI_ISL_473305	1059	C	T	1057	29901	NSP2	T85I	SNP	Non-Structural protein 2	NSP2:T85I	C1059T
EPI_ISL_473305	3037	C	T	3035	29901	NSP3	F106F	SNP_silent	Predicted phosphoesterase, papain-like proteinase	NSP3:F106F	C3037T
EPI_ISL_473305	14408	C	T	14406	29901	NSP12b	P314L	SNP	RNA-dependent RNA polymerase, post-ribosomal frameshift	NSP12b:P314L	C14408T
EPI_ISL_473305	23403	A	G	23401	29901	S	D614G	SNP	Spike	S:D614G	A23403G
EPI_ISL_473305	25563	G	T	25561	29901	ORF3a	Q57H	SNP	ORF3a protein	ORF3a:Q57H	G25563T
EPI_ISL_473305	27415	G	A	27413	29901	ORF7a	A8T	SNP	ORF7a protein	ORF7a:A8T	G27415A
EPI_ISL_473305	28371	G	T	28369	29901	N	S33I	SNP	Nucleocapsid protein	N:S33I	G28371T
EPI_ISL_473976	21	C	T	20	29902	5'UTR	21	extragenic		5'UTR:21	C21T
EPI_ISL_473976	241	C	T	240	29902	5'UTR	241	extragenic		5'UTR:241	C241T
EPI_ISL_473976	829	C	T	828	29902	NSP2	N8N	SNP_silent	Non-Structural protein 2	NSP2:N8N	C829T
EPI_ISL_473976	1059	C	T	1058	29902	NSP2	T85I	SNP	Non-Structural protein 2	NSP2:T85I	C1059T
EPI_ISL_473976	3037	C	T	3036	29902	NSP3	F106F	SNP_silent	Predicted phosphoesterase, papain-like proteinase	NSP3:F106F	C3037T
EPI_ISL_473976	12769	G	T	12768	29902	NSP9	A28A	SNP_silent	ssRNA-binding protein	NSP9:A28A	G12769T
EPI_ISL_473976	14408	C	T	14407	29902	NSP12b	P314L	SNP	RNA-dependent RNA polymerase, post-ribosomal frameshift	NSP12b:P314L	C14408T
EPI_ISL_473976	23403	A	G	23402	29902	S	D614G	SNP	Spike	S:D614G	A23403G
EPI_ISL_473976	25563	G	T	25562	29902	ORF3a	Q57H	SNP	ORF3a protein	ORF3a:Q57H	G25563T
EPI_ISL_473976	27415	G	A	27414	29902	ORF7a	A8T	SNP	ORF7a protein	ORF7a:A8T	G27415A
EPI_ISL_473976	28371	G	T	28370	29902	N	S33I	SNP	Nucleocapsid protein	N:S33I	G28371T
EPI_ISL_473976	29546	C	T	29545	29902	3'UTR	29546	extragenic		3'UTR:29546	C29546T
EPI_ISL_474045	21	C	T	18	29900	5'UTR	21	extragenic		5'UTR:21	C21T
EPI_ISL_474045	241	C	T	238	29900	5'UTR	241	extragenic		5'UTR:241	C241T
EPI_ISL_474045	829	C	T	826	29900	NSP2	N8N	SNP_silent	Non-Structural protein 2	NSP2:N8N	C829T
EPI_ISL_474045	1059	C	T	1056	29900	NSP2	T85I	SNP	Non-Structural protein 2	NSP2:T85I	C1059T
EPI_ISL_474045	3037	C	T	3034	29900	NSP3	F106F	SNP_silent	Predicted phosphoesterase, papain-like proteinase	NSP3:F106F	C3037T
EPI_ISL_474045	14408	C	T	14405	29900	NSP12b	P314L	SNP	RNA-dependent RNA polymerase, post-ribosomal frameshift	NSP12b:P314L	C14408T
EPI_ISL_474045	23403	A	G	23400	29900	S	D614G	SNP	Spike	S:D614G	A23403G
EPI_ISL_474045	25563	G	T	25560	29900	ORF3a	Q57H	SNP	ORF3a protein	ORF3a:Q57H	G25563T
EPI_ISL_474045	27415	G	A	27412	29900	ORF7a	A8T	SNP	ORF7a protein	ORF7a:A8T	G27415A
EPI_ISL_474045	28371	G	T	28368	29900	N	S33I	SNP	Nucleocapsid protein	N:S33I	G28371T
EPI_ISL_474173	21	C	T	14	29896	5'UTR	21	extragenic		5'UTR:21	C21T
EPI_ISL_474173	241	C	T	234	29896	5'UTR	241	extragenic		5'UTR:241	C241T
EPI_ISL_474173	829	C	T	822	29896	NSP2	N8N	SNP_silent	Non-Structural protein 2	NSP2:N8N	C829T
EPI_ISL_474173	1059	C	T	1052	29896	NSP2	T85I	SNP	Non-Structural protein 2	NSP2:T85I	C1059T
EPI_ISL_474173	3037	C	T	3030	29896	NSP3	F106F	SNP_silent	Predicted phosphoesterase, papain-like proteinase	NSP3:F106F	C3037T
EPI_ISL_474173	14408	C	T	14401	29896	NSP12b	P314L	SNP	RNA-dependent RNA polymerase, post-ribosomal frameshift	NSP12b:P314L	C14408T
EPI_ISL_474173	23403	A	G	23396	29896	S	D614G	SNP	Spike	S:D614G	A23403G
EPI_ISL_474173	25563	G	T	25556	29896	ORF3a	Q57H	SNP	ORF3a protein	ORF3a:Q57H	G25563T
EPI_ISL_474173	27415	G	A	27408	29896	ORF7a	A8T	SNP	ORF7a protein	ORF7a:A8T	G27415A
EPI_ISL_474173	28371	G	T	28364	29896	N	S33I	SNP	Nucleocapsid protein	N:S33I	G28371T
EPI_ISL_461493	22	A	T	22	29903	5'UTR	22	extragenic		5'UTR:22	A22T
EPI_ISL_461493	241	C	T	241	29903	5'UTR	241	extragenic		5'UTR:241	C241T
EPI_ISL_461493	3037	C	T	3037	29903	NSP3	F106F	SNP_silent	Predicted phosphoesterase, papain-like proteinase	NSP3:F106F	C3037T
EPI_ISL_461493	3634	C	T	3634	29903	NSP3	N305N	SNP_silent	Predicted phosphoesterase, papain-like proteinase	NSP3:N305N	C3634T
EPI_ISL_461493	14408	C	T	14408	29903	NSP12b	P314L	SNP	RNA-dependent RNA polymerase, post-ribosomal frameshift	NSP12b:P314L	C14408T
EPI_ISL_461493	15324	C	T	15324	29903	NSP12b	N619N	SNP_silent	RNA-dependent RNA polymerase, post-ribosomal frameshift	NSP12b:N619N	C15324T
EPI_ISL_461493	23403	A	G	23403	29903	S	D614G	SNP	Spike	S:D614G	A23403G
EPI_ISL_461493	28854	C	T	28854	29903	N	S194L	SNP	Nucleocapsid protein	N:S194L	C28854T
EPI_ISL_461494	22	A	T	22	29903	5'UTR	22	extragenic		5'UTR:22	A22T
EPI_ISL_461494	219	G	T	219	29903	5'UTR	219	extragenic		5'UTR:219	G219T
EPI_ISL_461494	241	C	T	241	29903	5'UTR	241	extragenic		5'UTR:241	C241T
EPI_ISL_461494	3037	C	T	3037	29903	NSP3	F106F	SNP_silent	Predicted phosphoesterase, papain-like proteinase	NSP3:F106F	C3037T
EPI_ISL_461494	3634	C	T	3634	29903	NSP3	N305N	SNP_silent	Predicted phosphoesterase, papain-like proteinase	NSP3:N305N	C3634T
EPI_ISL_461494	14408	C	T	14408	29903	NSP12b	P314L	SNP	RNA-dependent RNA polymerase, post-ribosomal frameshift	NSP12b:P314L	C14408T
EPI_ISL_461494	23403	A	G	23403	29903	S	D614G	SNP	Spike	S:D614G	A23403G
EPI_ISL_461494	25563	G	T	25563	29903	ORF3a	Q57H	SNP	ORF3a protein	ORF3a:Q57H	G25563T
EPI_ISL_429758	23	G	A	23	29861	5'UTR	23	extragenic		5'UTR:23	G23A
EPI_ISL_429758	241	C	T	241	29861	5'UTR	241	extragenic		5'UTR:241	C241T
EPI_ISL_429758	3037	C	T	3037	29861	NSP3	F106F	SNP_silent	Predicted phosphoesterase, papain-like proteinase	NSP3:F106F	C3037T
EPI_ISL_429758	3261	C	T	3261	29861	NSP3	T181I	SNP	Predicted phosphoesterase, papain-like proteinase	NSP3:T181I	C3261T
EPI_ISL_429758	14408	C	T	14408	29861	NSP12b	P314L	SNP	RNA-dependent RNA polymerase, post-ribosomal frameshift	NSP12b:P314L	C14408T
EPI_ISL_429758	23403	A	G	23403	29861	S	D614G	SNP	Spike	S:D614G	A23403G
EPI_ISL_429758	24151	T	C	24151	29861	S	P863P	SNP_silent	Spike	S:P863P	T24151C
EPI_ISL_429758	28881	GGG	AAC	28881	29861	N	RG203KR	SNP	Nucleocapsid protein	N:RG203KR	GGG28881AAC
EPI_ISL_430946	23	G	A	12	29910	5'UTR	23	extragenic		5'UTR:23	G23A
EPI_ISL_430946	241	C	T	230	29910	5'UTR	241	extragenic		5'UTR:241	C241T
EPI_ISL_430946	3037	C	T	3026	29910	NSP3	F106F	SNP_silent	Predicted phosphoesterase, papain-like proteinase	NSP3:F106F	C3037T
EPI_ISL_430946	13517	C	T	13506	29910	NSP12b	T17I	SNP	RNA-dependent RNA polymerase, post-ribosomal frameshift	NSP12b:T17I	C13517T
EPI_ISL_430946	14408	C	T	14397	29910	NSP12b	P314L	SNP	RNA-dependent RNA polymerase, post-ribosomal frameshift	NSP12b:P314L	C14408T
EPI_ISL_430946	23403	A	G	23392	29910	S	D614G	SNP	Spike	S:D614G	A23403G
EPI_ISL_430946	25350	C	T	25339	29910	S	P1263L	SNP	Spike	S:P1263L	C25350T
EPI_ISL_430946	29864	G	A	29853	29910	3'UTR	29864	extragenic		3'UTR:29864	G29864A
EPI_ISL_430946	29867	TG	AA	29856	29910	3'UTR	29867	extragenic		3'UTR:29867	TG29867AA
EPI_ISL_430946	29870	C	A	29859	29910	3'UTR	29870	extragenic		3'UTR:29870	C29870A
EPI_ISL_458104	23	G	A	23	29903	5'UTR	23	extragenic		5'UTR:23	G23A
EPI_ISL_458104	241	C	T	241	29903	5'UTR	241	extragenic		5'UTR:241	C241T
EPI_ISL_458104	3037	C	T	3037	29903	NSP3	F106F	SNP_silent	Predicted phosphoesterase, papain-like proteinase	NSP3:F106F	C3037T
EPI_ISL_458104	9438	C	T	9438	29903	NSP4	T295I	SNP	Transmembrane protein	NSP4:T295I	C9438T
EPI_ISL_458104	14408	C	T	14408	29903	NSP12b	P314L	SNP	RNA-dependent RNA polymerase, post-ribosomal frameshift	NSP12b:P314L	C14408T
EPI_ISL_458104	23403	A	G	23403	29903	S	D614G	SNP	Spike	S:D614G	A23403G
EPI_ISL_466261	23	G	T	23	29903	5'UTR	23	extragenic		5'UTR:23	G23T
EPI_ISL_466261	241	C	T	241	29903	5'UTR	241	extragenic		5'UTR:241	C241T
EPI_ISL_466261	313	C	T	313	29903	NSP1	L16L	SNP_silent	Leader protein	NSP1:L16L	C313T
EPI_ISL_466261	3037	C	T	3037	29903	NSP3	F106F	SNP_silent	Predicted phosphoesterase, papain-like proteinase	NSP3:F106F	C3037T
EPI_ISL_466261	14408	C	T	14408	29903	NSP12b	P314L	SNP	RNA-dependent RNA polymerase, post-ribosomal frameshift	NSP12b:P314L	C14408T
EPI_ISL_466261	23403	A	G	23403	29903	S	D614G	SNP	Spike	S:D614G	A23403G
EPI_ISL_466261	27382	G	T	27382	29903	ORF6	D61Y	SNP	ORF6 protein	ORF6:D61Y	G27382T
EPI_ISL_466261	28881	GGG	AAC	28881	29903	N	RG203KR	SNP	Nucleocapsid protein	N:RG203KR	GGG28881AAC
EPI_ISL_428696	25	T	G	11	29848	5'UTR	25	extragenic		5'UTR:25	T25G
EPI_ISL_428696	241	C	T	227	29848	5'UTR	241	extragenic		5'UTR:241	C241T
EPI_ISL_428696	3037	C	T	3023	29848	NSP3	F106F	SNP_silent	Predicted phosphoesterase, papain-like proteinase	NSP3:F106F	C3037T
EPI_ISL_428696	14408	C	T	14394	29848	NSP12b	P314L	SNP	RNA-dependent RNA polymerase, post-ribosomal frameshift	NSP12b:P314L	C14408T
EPI_ISL_428696	20268	A	G	20254	29848	NSP15	L216L	SNP_silent	endoRNAse	NSP15:L216L	A20268G
EPI_ISL_428696	23403	A	G	23389	29848	S	D614G	SNP	Spike	S:D614G	A23403G
EPI_ISL_428696	29825	.	T	29812	29848	3'UTR	29825	extragenic		3'UTR:29825	.29825T
EPI_ISL_408668	26	A	.	25	29889	5'UTR	26	extragenic		5'UTR:26	A26.
EPI_ISL_408668	28	C	T	27	29889	5'UTR	28	extragenic		5'UTR:28	C28T
EPI_ISL_408668	8782	C	T	8781	29889	NSP4	S76S	SNP_silent	Transmembrane protein	NSP4:S76S	C8782T
EPI_ISL_408668	24034	C	T	24033	29889	S	N824N	SNP_silent	Spike	S:N824N	C24034T
EPI_ISL_408668	26729	T	C	26728	29889	M	A69A	SNP_silent	Membrane	M:A69A	T26729C
EPI_ISL_408668	28077	G	C	28076	29889	ORF8	V62L	SNP	ORF8 protein	ORF8:V62L	G28077C
EPI_ISL_408668	28144	T	C	28143	29889	ORF8	L84S	SNP	ORF8 protein	ORF8:L84S	T28144C
EPI_ISL_408668	29859	T	C	29858	29889	3'UTR	29859	extragenic		3'UTR:29859	T29859C
EPI_ISL_408668	29862	G	C	29861	29889	3'UTR	29862	extragenic		3'UTR:29862	G29862C
EPI_ISL_408668	29864	G	.	29862	29889	3'UTR	29864	extragenic		3'UTR:29864	G29864.
EPI_ISL_408668	29867	T	A	29865	29889	3'UTR	29867	extragenic		3'UTR:29867	T29867A
EPI_ISL_414636	26	A	.	25	29902	5'UTR	26	extragenic		5'UTR:26	A26.
EPI_ISL_414636	28	C	T	27	29902	5'UTR	28	extragenic		5'UTR:28	C28T
EPI_ISL_414636	105	G	T	104	29902	5'UTR	105	extragenic		5'UTR:105	G105T
EPI_ISL_414636	241	C	T	240	29902	5'UTR	241	extragenic		5'UTR:241	C241T
EPI_ISL_414636	1059	C	T	1058	29902	NSP2	T85I	SNP	Non-Structural protein 2	NSP2:T85I	C1059T
EPI_ISL_414636	3037	C	T	3036	29902	NSP3	F106F	SNP_silent	Predicted phosphoesterase, papain-like proteinase	NSP3:F106F	C3037T
EPI_ISL_414636	14408	C	T	14407	29902	NSP12b	P314L	SNP	RNA-dependent RNA polymerase, post-ribosomal frameshift	NSP12b:P314L	C14408T
EPI_ISL_414636	15213	A	G	15212	29902	NSP12b	T582T	SNP_silent	RNA-dependent RNA polymerase, post-ribosomal frameshift	NSP12b:T582T	A15213G
EPI_ISL_414636	20766	A	G	20765	29902	NSP16	L36L	SNP_silent	2'-O-ribose methyltransferase	NSP16:L36L	A20766G
EPI_ISL_414636	23403	A	G	23402	29902	S	D614G	SNP	Spike	S:D614G	A23403G
EPI_ISL_414636	25563	G	T	25562	29902	ORF3a	Q57H	SNP	ORF3a protein	ORF3a:Q57H	G25563T
EPI_ISL_414636	26199	G	T	26198	29902	ORF3a	T269T	SNP_silent	ORF3a protein	ORF3a:T269T	G26199T
EPI_ISL_416427	26	A	.	25	29889	5'UTR	26	extragenic		5'UTR:26	A26.
EPI_ISL_416427	28	C	T	27	29889	5'UTR	28	extragenic		5'UTR:28	C28T
EPI_ISL_416427	8782	C	T	8781	29889	NSP4	S76S	SNP_silent	Transmembrane protein	NSP4:S76S	C8782T
EPI_ISL_416427	24034	C	T	24033	29889	S	N824N	SNP_silent	Spike	S:N824N	C24034T
EPI_ISL_416427	26729	T	C	26728	29889	M	A69A	SNP_silent	Membrane	M:A69A	T26729C
EPI_ISL_416427	28077	G	C	28076	29889	ORF8	V62L	SNP	ORF8 protein	ORF8:V62L	G28077C
EPI_ISL_416427	28144	T	C	28143	29889	ORF8	L84S	SNP	ORF8 protein	ORF8:L84S	T28144C
EPI_ISL_416427	29859	T	C	29858	29889	3'UTR	29859	extragenic		3'UTR:29859	T29859C
EPI_ISL_416427	29862	G	C	29861	29889	3'UTR	29862	extragenic		3'UTR:29862	G29862C
EPI_ISL_416427	29864	G	.	29862	29889	3'UTR	29864	extragenic		3'UTR:29864	G29864.
EPI_ISL_416427	29867	T	A	29865	29889	3'UTR	29867	extragenic		3'UTR:29867	T29867A
EPI_ISL_418267	26	A	.	25	29890	5'UTR	26	extragenic		5'UTR:26	A26.
EPI_ISL_418267	28	C	T	27	29890	5'UTR	28	extragenic		5'UTR:28	C28T
EPI_ISL_418267	10232	C	T	10231	29890	NSP5	R60C	SNP	3C-like proteinase	NSP5:R60C	C10232T
EPI_ISL_431118	26	A	.	6	29844	5'UTR	26	extragenic		5'UTR:26	A26.
EPI_ISL_431118	28	C	T	8	29844	5'UTR	28	extragenic		5'UTR:28	C28T
EPI_ISL_431118	241	C	T	221	29844	5'UTR	241	extragenic		5'UTR:241	C241T
EPI_ISL_431118	1059	C	T	1039	29844	NSP2	T85I	SNP	Non-Structural protein 2	NSP2:T85I	C1059T
EPI_ISL_431118	3037	C	T	3017	29844	NSP3	F106F	SNP_silent	Predicted phosphoesterase, papain-like proteinase	NSP3:F106F	C3037T
EPI_ISL_431118	14408	C	T	14388	29844	NSP12b	P314L	SNP	RNA-dependent RNA polymerase, post-ribosomal frameshift	NSP12b:P314L	C14408T
EPI_ISL_431118	23403	A	G	23383	29844	S	D614G	SNP	Spike	S:D614G	A23403G
EPI_ISL_431118	25563	G	T	25543	29844	ORF3a	Q57H	SNP	ORF3a protein	ORF3a:Q57H	G25563T
EPI_ISL_431118	26589	G	T	26569	29844	M	V23L	SNP	Membrane	M:V23L	G26589T
EPI_ISL_431180	26	A	.	5	29812	5'UTR	26	extragenic		5'UTR:26	A26.
EPI_ISL_431180	28	C	T	7	29812	5'UTR	28	extragenic		5'UTR:28	C28T
EPI_ISL_431180	241	C	T	220	29812	5'UTR	241	extragenic		5'UTR:241	C241T
EPI_ISL_431180	3037	C	T	3016	29812	NSP3	F106F	SNP_silent	Predicted phosphoesterase, papain-like proteinase	NSP3:F106F	C3037T
EPI_ISL_431180	14408	C	T	14387	29812	NSP12b	P314L	SNP	RNA-dependent RNA polymerase, post-ribosomal frameshift	NSP12b:P314L	C14408T
EPI_ISL_431180	23403	A	G	23382	29812	S	D614G	SNP	Spike	S:D614G	A23403G
EPI_ISL_431180	25088	G	T	25067	29812	S	V1176F	SNP	Spike	S:V1176F	G25088T
EPI_ISL_431180	28881	GGG	AAC	28860	29812	N	RG203KR	SNP	Nucleocapsid protein	N:RG203KR	GGG28881AAC
EPI_ISL_431180	29805	.	A	29785	29812	3'UTR	29805	extragenic		3'UTR:29805	.29805A
EPI_ISL_431240	26	A	.	15	29822	5'UTR	26	extragenic		5'UTR:26	A26.
EPI_ISL_431240	28	C	T	17	29822	5'UTR	28	extragenic		5'UTR:28	C28T
EPI_ISL_431240	241	C	T	230	29822	5'UTR	241	extragenic		5'UTR:241	C241T
EPI_ISL_431240	3037	C	T	3026	29822	NSP3	F106F	SNP_silent	Predicted phosphoesterase, papain-like proteinase	NSP3:F106F	C3037T
EPI_ISL_431240	14408	C	T	14397	29822	NSP12b	P314L	SNP	RNA-dependent RNA polymerase, post-ribosomal frameshift	NSP12b:P314L	C14408T
EPI_ISL_431240	23403	A	G	23392	29822	S	D614G	SNP	Spike	S:D614G	A23403G
EPI_ISL_431240	25088	G	T	25077	29822	S	V1176F	SNP	Spike	S:V1176F	G25088T
EPI_ISL_431240	28881	GGG	AAC	28870	29822	N	RG203KR	SNP	Nucleocapsid protein	N:RG203KR	GGG28881AAC
EPI_ISL_431785	26	A	.	19	29858	5'UTR	26	extragenic		5'UTR:26	A26.
EPI_ISL_431785	1077	C	T	1070	29858	NSP2	P91L	SNP	Non-Structural protein 2	NSP2:P91L	C1077T
EPI_ISL_431785	8782	C	T	8775	29858	NSP4	S76S	SNP_silent	Transmembrane protein	NSP4:S76S	C8782T
EPI_ISL_431785	28144	T	C	28137	29858	ORF8	L84S	SNP	ORF8 protein	ORF8:L84S	T28144C
EPI_ISL_431785	28878	G	A	28871	29858	N	S202N	SNP	Nucleocapsid protein	N:S202N	G28878A
EPI_ISL_431785	29742	G	A	29735	29858	3'UTR	29742	extragenic		3'UTR:29742	G29742A
EPI_ISL_431785	29850	.	T	29844	29858	3'UTR	29850	extragenic		3'UTR:29850	.29850T
EPI_ISL_443288	26	A	.	26	29876	5'UTR	26	extragenic		5'UTR:26	A26.
EPI_ISL_443288	28	C	T	28	29876	5'UTR	28	extragenic		5'UTR:28	C28T
EPI_ISL_443288	61	G	T	61	29876	5'UTR	61	extragenic		5'UTR:61	G61T
EPI_ISL_443288	241	C	T	241	29876	5'UTR	241	extragenic		5'UTR:241	C241T
EPI_ISL_443288	3037	C	T	3037	29876	NSP3	F106F	SNP_silent	Predicted phosphoesterase, papain-like proteinase	NSP3:F106F	C3037T
EPI_ISL_443288	14408	C	T	14408	29876	NSP12b	P314L	SNP	RNA-dependent RNA polymerase, post-ribosomal frameshift	NSP12b:P314L	C14408T
EPI_ISL_443288	15324	C	T	15324	29876	NSP12b	N619N	SNP_silent	RNA-dependent RNA polymerase, post-ribosomal frameshift	NSP12b:N619N	C15324T
EPI_ISL_443288	22404	A	T	22404	29876	S	E281V	SNP	Spike	S:E281V	A22404T
EPI_ISL_443288	23403	A	G	23403	29876	S	D614G	SNP	Spike	S:D614G	A23403G
EPI_ISL_443288	29474	G	T	29474	29876	N	D401Y	SNP	Nucleocapsid protein	N:D401Y	G29474T
EPI_ISL_443305	26	A	.	26	29867	5'UTR	26	extragenic		5'UTR:26	A26.
EPI_ISL_443305	28	C	T	28	29867	5'UTR	28	extragenic		5'UTR:28	C28T
EPI_ISL_443305	241	C	T	241	29867	5'UTR	241	extragenic		5'UTR:241	C241T
EPI_ISL_443305	3037	C	T	3037	29867	NSP3	F106F	SNP_silent	Predicted phosphoesterase, papain-like proteinase	NSP3:F106F	C3037T
EPI_ISL_443305	10561	T	C	10561	29867	NSP5	T169T	SNP_silent	3C-like proteinase	NSP5:T169T	T10561C
EPI_ISL_443305	14408	C	T	14408	29867	NSP12b	P314L	SNP	RNA-dependent RNA polymerase, post-ribosomal frameshift	NSP12b:P314L	C14408T
EPI_ISL_443305	15324	C	T	15324	29867	NSP12b	N619N	SNP_silent	RNA-dependent RNA polymerase, post-ribosomal frameshift	NSP12b:N619N	C15324T
EPI_ISL_443305	16887	C	T	16887	29867	NSP13	Y217Y	SNP_silent	Helicase	NSP13:Y217Y	C16887T
EPI_ISL_443305	23403	A	G	23403	29867	S	D614G	SNP	Spike	S:D614G	A23403G
EPI_ISL_443305	27350	C	T	27350	29867	ORF6	S50F	SNP	ORF6 protein	ORF6:S50F	C27350T
EPI_ISL_445294	27	A	C	4	29815	5'UTR	27	extragenic		5'UTR:27	A27C
EPI_ISL_445294	241	C	T	218	29815	5'UTR	241	extragenic		5'UTR:241	C241T
EPI_ISL_445294	1059	C	T	1036	29815	NSP2	T85I	SNP	Non-Structural protein 2	NSP2:T85I	C1059T
EPI_ISL_445294	3037	C	T	3014	29815	NSP3	F106F	SNP_silent	Predicted phosphoesterase, papain-like proteinase	NSP3:F106F	C3037T
EPI_ISL_445294	14408	C	T	14385	29815	NSP12b	P314L	SNP	RNA-dependent RNA polymerase, post-ribosomal frameshift	NSP12b:P314L	C14408T
EPI_ISL_445294	23403	A	G	23380	29815	S	D614G	SNP	Spike	S:D614G	A23403G
EPI_ISL_445294	25563	G	T	25540	29815	ORF3a	Q57H	SNP	ORF3a protein	ORF3a:Q57H	G25563T
EPI_ISL_445307	27	A	C	4	29830	5'UTR	27	extragenic		5'UTR:27	A27C
EPI_ISL_445307	241	C	T	218	29830	5'UTR	241	extragenic		5'UTR:241	C241T
EPI_ISL_445307	3037	C	T	3014	29830	NSP3	F106F	SNP_silent	Predicted phosphoesterase, papain-like proteinase	NSP3:F106F	C3037T
EPI_ISL_445307	5230	G	T	5207	29830	NSP3	K837N	SNP	Predicted phosphoesterase, papain-like proteinase	NSP3:K837N	G5230T
EPI_ISL_445307	14408	C	T	14385	29830	NSP12b	P314L	SNP	RNA-dependent RNA polymerase, post-ribosomal frameshift	NSP12b:P314L	C14408T
EPI_ISL_445307	19269	C	T	19246	29830	NSP14	N410N	SNP_silent	3'-to-5' exonuclease	NSP14:N410N	C19269T
EPI_ISL_445307	20268	A	G	20245	29830	NSP15	L216L	SNP_silent	endoRNAse	NSP15:L216L	A20268G
EPI_ISL_445307	23403	A	G	23380	29830	S	D614G	SNP	Spike	S:D614G	A23403G
EPI_ISL_445307	29843	G	C	29820	29830	3'UTR	29843	extragenic		3'UTR:29843	G29843C
EPI_ISL_445307	29845	T	C	29822	29830	3'UTR	29845	extragenic		3'UTR:29845	T29845C
EPI_ISL_445307	29848	T	C	29825	29830	3'UTR	29848	extragenic		3'UTR:29848	T29848C
EPI_ISL_455328	27	A	C	26	29835	5'UTR	27	extragenic		5'UTR:27	A27C
EPI_ISL_455328	8782	C	T	8781	29835	NSP4	S76S	SNP_silent	Transmembrane protein	NSP4:S76S	C8782T
EPI_ISL_455328	8927	G	A	8926	29835	NSP4	V125I	SNP	Transmembrane protein	NSP4:V125I	G8927A
EPI_ISL_455328	8938	AG	GA	8937	29835	NSP4	V129I	SNP	Transmembrane protein	NSP4:V129I	AG8938GA
EPI_ISL_455328	9477	T	A	9476	29835	NSP4	F308Y	SNP	Transmembrane protein	NSP4:F308Y	T9477A
EPI_ISL_455328	14805	C	T	14804	29835	NSP12b	Y446Y	SNP_silent	RNA-dependent RNA polymerase, post-ribosomal frameshift	NSP12b:Y446Y	C14805T
EPI_ISL_455328	21174	A	G	21173	29835	NSP16	T172T	SNP_silent	2'-O-ribose methyltransferase	NSP16:T172T	A21174G
EPI_ISL_455328	25537	G	T	25536	29835	ORF3a	G49C	SNP	ORF3a protein	ORF3a:G49C	G25537T
EPI_ISL_455328	25979	G	T	25978	29835	ORF3a	G196V	SNP	ORF3a protein	ORF3a:G196V	G25979T
EPI_ISL_455328	28144	T	C	28143	29835	ORF8	L84S	SNP	ORF8 protein	ORF8:L84S	T28144C
EPI_ISL_455328	28657	C	T	28656	29835	N	D128D	SNP_silent	Nucleocapsid protein	N:D128D	C28657T
EPI_ISL_455328	28863	C	T	28862	29835	N	S197L	SNP	Nucleocapsid protein	N:S197L	C28863T
EPI_ISL_455328	29718	C	T	29717	29835	3'UTR	29718	extragenic		3'UTR:29718	C29718T
EPI_ISL_455329	27	A	C	26	29835	5'UTR	27	extragenic		5'UTR:27	A27C
EPI_ISL_455329	8527	A	G	8526	29835	NSP3	V1936V	SNP_silent	Predicted phosphoesterase, papain-like proteinase	NSP3:V1936V	A8527G
EPI_ISL_455329	8671	T	A	8670	29835	NSP4	F39L	SNP	Transmembrane protein	NSP4:F39L	T8671A
EPI_ISL_455329	8782	C	T	8781	29835	NSP4	S76S	SNP_silent	Transmembrane protein	NSP4:S76S	C8782T
EPI_ISL_455329	9477	T	A	9476	29835	NSP4	F308Y	SNP	Transmembrane protein	NSP4:F308Y	T9477A
EPI_ISL_455329	14805	C	T	14804	29835	NSP12b	Y446Y	SNP_silent	RNA-dependent RNA polymerase, post-ribosomal frameshift	NSP12b:Y446Y	C14805T
EPI_ISL_455329	25537	G	T	25536	29835	ORF3a	G49C	SNP	ORF3a protein	ORF3a:G49C	G25537T
EPI_ISL_455329	25979	G	T	25978	29835	ORF3a	G196V	SNP	ORF3a protein	ORF3a:G196V	G25979T
EPI_ISL_455329	28144	T	C	28143	29835	ORF8	L84S	SNP	ORF8 protein	ORF8:L84S	T28144C
EPI_ISL_455329	28657	C	T	28656	29835	N	D128D	SNP_silent	Nucleocapsid protein	N:D128D	C28657T
EPI_ISL_455329	28863	C	T	28862	29835	N	S197L	SNP	Nucleocapsid protein	N:S197L	C28863T
EPI_ISL_455329	29718	C	T	29717	29835	3'UTR	29718	extragenic		3'UTR:29718	C29718T
EPI_ISL_462431	27	A	G	27	29891	5'UTR	27	extragenic		5'UTR:27	A27G
EPI_ISL_462431	241	C	T	241	29891	5'UTR	241	extragenic		5'UTR:241	C241T
EPI_ISL_462431	3037	C	T	3037	29891	NSP3	F106F	SNP_silent	Predicted phosphoesterase, papain-like proteinase	NSP3:F106F	C3037T
EPI_ISL_462431	14408	C	T	14408	29891	NSP12b	P314L	SNP	RNA-dependent RNA polymerase, post-ribosomal frameshift	NSP12b:P314L	C14408T
EPI_ISL_462431	23403	A	G	23403	29891	S	D614G	SNP	Spike	S:D614G	A23403G
EPI_ISL_462431	28881	GGG	AAC	28881	29891	N	RG203KR	SNP	Nucleocapsid protein	N:RG203KR	GGG28881AAC
EPI_ISL_466099	27	A	G	27	29903	5'UTR	27	extragenic		5'UTR:27	A27G
EPI_ISL_466099	241	C	T	241	29903	5'UTR	241	extragenic		5'UTR:241	C241T
EPI_ISL_466099	3037	C	T	3037	29903	NSP3	F106F	SNP_silent	Predicted phosphoesterase, papain-like proteinase	NSP3:F106F	C3037T
EPI_ISL_466099	14408	C	T	14408	29903	NSP12b	P314L	SNP	RNA-dependent RNA polymerase, post-ribosomal frameshift	NSP12b:P314L	C14408T
EPI_ISL_466099	23403	A	G	23403	29903	S	D614G	SNP	Spike	S:D614G	A23403G
EPI_ISL_466099	28377	C	T	28377	29903	N	A35V	SNP	Nucleocapsid protein	N:A35V	C28377T
EPI_ISL_466099	28881	GGG	AAC	28881	29903	N	RG203KR	SNP	Nucleocapsid protein	N:RG203KR	GGG28881AAC
EPI_ISL_428365	28	C	T	28	29812	5'UTR	28	extragenic		5'UTR:28	C28T
EPI_ISL_428365	241	C	T	241	29812	5'UTR	241	extragenic		5'UTR:241	C241T
EPI_ISL_428365	1059	C	T	1059	29812	NSP2	T85I	SNP	Non-Structural protein 2	NSP2:T85I	C1059T
EPI_ISL_428365	3037	C	T	3037	29812	NSP3	F106F	SNP_silent	Predicted phosphoesterase, papain-like proteinase	NSP3:F106F	C3037T
EPI_ISL_428365	9214	C	T	9214	29812	NSP4	Y220Y	SNP_silent	Transmembrane protein	NSP4:Y220Y	C9214T
EPI_ISL_428365	10889	C	T	10889	29812	NSP5	R279C	SNP	3C-like proteinase	NSP5:R279C	C10889T
EPI_ISL_428365	14408	C	T	14408	29812	NSP12b	P314L	SNP	RNA-dependent RNA polymerase, post-ribosomal frameshift	NSP12b:P314L	C14408T
EPI_ISL_428365	23403	A	G	23403	29812	S	D614G	SNP	Spike	S:D614G	A23403G
EPI_ISL_428365	25563	G	T	25563	29812	ORF3a	Q57H	SNP	ORF3a protein	ORF3a:Q57H	G25563T
EPI_ISL_428365	25821	C	T	25821	29812	ORF3a	A143A	SNP_silent	ORF3a protein	ORF3a:A143A	C25821T
EPI_ISL_432221	28	C	T	28	29903	5'UTR	28	extragenic		5'UTR:28	C28T
EPI_ISL_432221	1820	G	A	1820	29903	NSP2	G339S	SNP	Non-Structural protein 2	NSP2:G339S	G1820A
EPI_ISL_432221	4965	C	T	4965	29903	NSP3	T749I	SNP	Predicted phosphoesterase, papain-like proteinase	NSP3:T749I	C4965T
EPI_ISL_432221	11083	G	T	11083	29903	NSP6	L37F	SNP	Transmembrane protein	NSP6:L37F	G11083T
EPI_ISL_432221	14805	C	T	14805	29903	NSP12b	Y446Y	SNP_silent	RNA-dependent RNA polymerase, post-ribosomal frameshift	NSP12b:Y446Y	C14805T
EPI_ISL_432221	17247	T	C	17247	29903	NSP13	R337R	SNP_silent	Helicase	NSP13:R337R	T17247C
EPI_ISL_432221	26144	G	T	26144	29903	ORF3a	G251V	SNP	ORF3a protein	ORF3a:G251V	G26144T
EPI_ISL_432346	28	C	T	27	29902	5'UTR	28	extragenic		5'UTR:28	C28T
EPI_ISL_432346	1820	G	A	1819	29902	NSP2	G339S	SNP	Non-Structural protein 2	NSP2:G339S	G1820A
EPI_ISL_432346	4965	C	T	4964	29902	NSP3	T749I	SNP	Predicted phosphoesterase, papain-like proteinase	NSP3:T749I	C4965T
EPI_ISL_432346	11083	G	T	11082	29902	NSP6	L37F	SNP	Transmembrane protein	NSP6:L37F	G11083T
EPI_ISL_432346	14805	C	T	14804	29902	NSP12b	Y446Y	SNP_silent	RNA-dependent RNA polymerase, post-ribosomal frameshift	NSP12b:Y446Y	C14805T
EPI_ISL_432346	17247	T	C	17246	29902	NSP13	R337R	SNP_silent	Helicase	NSP13:R337R	T17247C
EPI_ISL_432346	26144	G	T	26143	29902	ORF3a	G251V	SNP	ORF3a protein	ORF3a:G251V	G26144T
EPI_ISL_443276	28	C	T	28	29881	5'UTR	28	extragenic		5'UTR:28	C28T
EPI_ISL_443276	241	C	T	241	29881	5'UTR	241	extragenic		5'UTR:241	C241T
EPI_ISL_443276	1059	C	T	1059	29881	NSP2	T85I	SNP	Non-Structural protein 2	NSP2:T85I	C1059T
EPI_ISL_443276	3037	C	T	3037	29881	NSP3	F106F	SNP_silent	Predicted phosphoesterase, papain-like proteinase	NSP3:F106F	C3037T
EPI_ISL_443276	13006	T	C	13006	29881	NSP9	A107A	SNP_silent	ssRNA-binding protein	NSP9:A107A	T13006C
EPI_ISL_443276	14408	C	T	14408	29881	NSP12b	P314L	SNP	RNA-dependent RNA polymerase, post-ribosomal frameshift	NSP12b:P314L	C14408T
EPI_ISL_443276	23403	A	G	23403	29881	S	D614G	SNP	Spike	S:D614G	A23403G
EPI_ISL_443276	25563	G	T	25563	29881	ORF3a	Q57H	SNP	ORF3a protein	ORF3a:Q57H	G25563T
EPI_ISL_443276	25688	C	T	25688	29881	ORF3a	A99V	SNP	ORF3a protein	ORF3a:A99V	C25688T
EPI_ISL_443276	28378	G	T	28378	29881	N	A35A	SNP_silent	Nucleocapsid protein	N:A35A	G28378T
EPI_ISL_445454	28	C	T	18	29893	5'UTR	28	extragenic		5'UTR:28	C28T
EPI_ISL_445454	1820	G	A	1810	29893	NSP2	G339S	SNP	Non-Structural protein 2	NSP2:G339S	G1820A
EPI_ISL_445454	6352	G	T	6342	29893	NSP3	K1211N	SNP	Predicted phosphoesterase, papain-like proteinase	NSP3:K1211N	G6352T
EPI_ISL_445454	11083	G	T	11073	29893	NSP6	L37F	SNP	Transmembrane protein	NSP6:L37F	G11083T
EPI_ISL_445454	14805	C	T	14795	29893	NSP12b	Y446Y	SNP_silent	RNA-dependent RNA polymerase, post-ribosomal frameshift	NSP12b:Y446Y	C14805T
EPI_ISL_445454	17247	T	C	17237	29893	NSP13	R337R	SNP_silent	Helicase	NSP13:R337R	T17247C
EPI_ISL_445454	26144	G	T	26134	29893	ORF3a	G251V	SNP	ORF3a protein	ORF3a:G251V	G26144T
EPI_ISL_445454	27632	G	T	27622	29893	ORF7a	R80I	SNP	ORF7a protein	ORF7a:R80I	G27632T
EPI_ISL_446159	28	C	T	25	29900	5'UTR	28	extragenic		5'UTR:28	C28T
EPI_ISL_446159	1820	G	A	1817	29900	NSP2	G339S	SNP	Non-Structural protein 2	NSP2:G339S	G1820A
EPI_ISL_446159	4965	C	T	4962	29900	NSP3	T749I	SNP	Predicted phosphoesterase, papain-like proteinase	NSP3:T749I	C4965T
EPI_ISL_446159	11083	G	T	11080	29900	NSP6	L37F	SNP	Transmembrane protein	NSP6:L37F	G11083T
EPI_ISL_446159	14805	C	T	14802	29900	NSP12b	Y446Y	SNP_silent	RNA-dependent RNA polymerase, post-ribosomal frameshift	NSP12b:Y446Y	C14805T
EPI_ISL_446159	17247	T	C	17244	29900	NSP13	R337R	SNP_silent	Helicase	NSP13:R337R	T17247C
EPI_ISL_446159	26144	G	T	26141	29900	ORF3a	G251V	SNP	ORF3a protein	ORF3a:G251V	G26144T
EPI_ISL_446858	28	C	T	28	29903	5'UTR	28	extragenic		5'UTR:28	C28T
EPI_ISL_446858	241	C	T	241	29903	5'UTR	241	extragenic		5'UTR:241	C241T
EPI_ISL_446858	3037	C	T	3037	29903	NSP3	F106F	SNP_silent	Predicted phosphoesterase, papain-like proteinase	NSP3:F106F	C3037T
EPI_ISL_446858	14408	C	T	14408	29903	NSP12b	P314L	SNP	RNA-dependent RNA polymerase, post-ribosomal frameshift	NSP12b:P314L	C14408T
EPI_ISL_446858	16289	C	T	16289	29903	NSP13	A18V	SNP	Helicase	NSP13:A18V	C16289T
EPI_ISL_446858	22286	C	T	22286	29903	S	L242F	SNP	Spike	S:L242F	C22286T
EPI_ISL_446858	23403	A	G	23403	29903	S	D614G	SNP	Spike	S:D614G	A23403G
EPI_ISL_446858	25429	G	T	25429	29903	ORF3a	V13L	SNP	ORF3a protein	ORF3a:V13L	G25429T
EPI_ISL_454721	28	C	T	6	29881	5'UTR	28	extragenic		5'UTR:28	C28T
EPI_ISL_454721	241	C	T	219	29881	5'UTR	241	extragenic		5'UTR:241	C241T
EPI_ISL_454721	3037	C	T	3015	29881	NSP3	F106F	SNP_silent	Predicted phosphoesterase, papain-like proteinase	NSP3:F106F	C3037T
EPI_ISL_454721	6512	A	C	6490	29881	NSP3	S1265R	SNP	Predicted phosphoesterase, papain-like proteinase	NSP3:S1265R	A6512C
EPI_ISL_454721	14408	C	T	14386	29881	NSP12b	P314L	SNP	RNA-dependent RNA polymerase, post-ribosomal frameshift	NSP12b:P314L	C14408T
EPI_ISL_454721	18877	C	T	18855	29881	NSP14	C279C	SNP_silent	3'-to-5' exonuclease	NSP14:C279C	C18877T
EPI_ISL_454721	23403	A	G	23381	29881	S	D614G	SNP	Spike	S:D614G	A23403G
EPI_ISL_454721	25563	G	T	25541	29881	ORF3a	Q57H	SNP	ORF3a protein	ORF3a:Q57H	G25563T
EPI_ISL_463124	28	C	T	24	29861	5'UTR	28	extragenic		5'UTR:28	C28T
EPI_ISL_463124	241	C	T	237	29861	5'UTR	241	extragenic		5'UTR:241	C241T
EPI_ISL_463124	1059	C	T	1055	29861	NSP2	T85I	SNP	Non-Structural protein 2	NSP2:T85I	C1059T
EPI_ISL_463124	3037	C	T	3033	29861	NSP3	F106F	SNP_silent	Predicted phosphoesterase, papain-like proteinase	NSP3:F106F	C3037T
EPI_ISL_463124	11916	C	T	11912	29861	NSP7	S25L	SNP	Non-Structural Protein 7	NSP7:S25L	C11916T
EPI_ISL_463124	14408	C	T	14404	29861	NSP12b	P314L	SNP	RNA-dependent RNA polymerase, post-ribosomal frameshift	NSP12b:P314L	C14408T
EPI_ISL_463124	18998	C	T	18994	29861	NSP14	A320V	SNP	3'-to-5' exonuclease	NSP14:A320V	C18998T
EPI_ISL_463124	23403	A	G	23399	29861	S	D614G	SNP	Spike	S:D614G	A23403G
EPI_ISL_463124	25563	G	T	25559	29861	ORF3a	Q57H	SNP	ORF3a protein	ORF3a:Q57H	G25563T
EPI_ISL_463124	25947	G	C	25943	29861	ORF3a	Q185H	SNP	ORF3a protein	ORF3a:Q185H	G25947C
EPI_ISL_463124	29077	C	T	29073	29861	N	Y268Y	SNP_silent	Nucleocapsid protein	N:Y268Y	C29077T
EPI_ISL_463124	29540	G	A	29536	29861	3'UTR	29540	extragenic		3'UTR:29540	G29540A
EPI_ISL_464282	28	C	T	28	29903	5'UTR	28	extragenic		5'UTR:28	C28T
EPI_ISL_464282	241	C	T	241	29903	5'UTR	241	extragenic		5'UTR:241	C241T
EPI_ISL_464282	3037	C	T	3037	29903	NSP3	F106F	SNP_silent	Predicted phosphoesterase, papain-like proteinase	NSP3:F106F	C3037T
EPI_ISL_464282	14408	C	T	14408	29903	NSP12b	P314L	SNP	RNA-dependent RNA polymerase, post-ribosomal frameshift	NSP12b:P314L	C14408T
EPI_ISL_464282	23403	A	G	23403	29903	S	D614G	SNP	Spike	S:D614G	A23403G
EPI_ISL_464282	28739	G	T	28739	29903	N	A156S	SNP	Nucleocapsid protein	N:A156S	G28739T
EPI_ISL_464319	28	C	T	28	29903	5'UTR	28	extragenic		5'UTR:28	C28T
EPI_ISL_464319	241	C	T	241	29903	5'UTR	241	extragenic		5'UTR:241	C241T
EPI_ISL_464319	3037	C	T	3037	29903	NSP3	F106F	SNP_silent	Predicted phosphoesterase, papain-like proteinase	NSP3:F106F	C3037T
EPI_ISL_464319	14408	C	T	14408	29903	NSP12b	P314L	SNP	RNA-dependent RNA polymerase, post-ribosomal frameshift	NSP12b:P314L	C14408T
EPI_ISL_464319	23403	A	G	23403	29903	S	D614G	SNP	Spike	S:D614G	A23403G
EPI_ISL_464319	28739	G	T	28739	29903	N	A156S	SNP	Nucleocapsid protein	N:A156S	G28739T
EPI_ISL_464466	28	C	T	28	29903	5'UTR	28	extragenic		5'UTR:28	C28T
EPI_ISL_464466	241	C	T	241	29903	5'UTR	241	extragenic		5'UTR:241	C241T
EPI_ISL_464466	3037	C	T	3037	29903	NSP3	F106F	SNP_silent	Predicted phosphoesterase, papain-like proteinase	NSP3:F106F	C3037T
EPI_ISL_464466	14408	C	T	14408	29903	NSP12b	P314L	SNP	RNA-dependent RNA polymerase, post-ribosomal frameshift	NSP12b:P314L	C14408T
EPI_ISL_464466	23403	A	G	23403	29903	S	D614G	SNP	Spike	S:D614G	A23403G
EPI_ISL_464466	28739	G	T	28739	29903	N	A156S	SNP	Nucleocapsid protein	N:A156S	G28739T
EPI_ISL_474663	28	C	T	28	29903	5'UTR	28	extragenic		5'UTR:28	C28T
EPI_ISL_474663	1820	G	A	1820	29903	NSP2	G339S	SNP	Non-Structural protein 2	NSP2:G339S	G1820A
EPI_ISL_474663	11083	G	T	11083	29903	NSP6	L37F	SNP	Transmembrane protein	NSP6:L37F	G11083T
EPI_ISL_474663	14805	C	T	14805	29903	NSP12b	Y446Y	SNP_silent	RNA-dependent RNA polymerase, post-ribosomal frameshift	NSP12b:Y446Y	C14805T
EPI_ISL_474663	17247	T	C	17247	29903	NSP13	R337R	SNP_silent	Helicase	NSP13:R337R	T17247C
EPI_ISL_474663	21846	C	T	21846	29903	S	T95I	SNP	Spike	S:T95I	C21846T
EPI_ISL_474663	26144	G	T	26144	29903	ORF3a	G251V	SNP	ORF3a protein	ORF3a:G251V	G26144T
EPI_ISL_437722	29	A	C	29	29903	5'UTR	29	extragenic		5'UTR:29	A29C
EPI_ISL_437722	4180	G	A	4180	29903	NSP3	K487K	SNP_silent	Predicted phosphoesterase, papain-like proteinase	NSP3:K487K	G4180A
EPI_ISL_437722	8782	C	T	8782	29903	NSP4	S76S	SNP_silent	Transmembrane protein	NSP4:S76S	C8782T
EPI_ISL_437722	22468	G	T	22468	29903	S	T302T	SNP_silent	Spike	S:T302T	G22468T
EPI_ISL_437722	26464	C	T	26464	29903	E	L73L	SNP_silent	Envelope	E:L73L	C26464T
EPI_ISL_437722	28144	T	C	28144	29903	ORF8	L84S	SNP	ORF8 protein	ORF8:L84S	T28144C
EPI_ISL_437722	28878	G	A	28878	29903	N	S202N	SNP	Nucleocapsid protein	N:S202N	G28878A
EPI_ISL_437722	29742	G	A	29742	29903	3'UTR	29742	extragenic		3'UTR:29742	G29742A
EPI_ISL_455342	29	A	T	29	29831	5'UTR	29	extragenic		5'UTR:29	A29T
EPI_ISL_455342	87	T	G	87	29831	5'UTR	87	extragenic		5'UTR:87	T87G
EPI_ISL_455342	10849	T	C	10849	29831	NSP5	C265C	SNP_silent	3C-like proteinase	NSP5:C265C	T10849C
EPI_ISL_455342	25979	G	T	25979	29831	ORF3a	G196V	SNP	ORF3a protein	ORF3a:G196V	G25979T
EPI_ISL_455342	27915	G	A	27915	29831	ORF8	G8R	SNP	ORF8 protein	ORF8:G8R	G27915A
EPI_ISL_455342	28144	T	C	28144	29831	ORF8	L84S	SNP	ORF8 protein	ORF8:L84S	T28144C
EPI_ISL_429601	30	AACC	CTTT	17	29890	5'UTR	30	extragenic		5'UTR:30	AACC30CTTT
EPI_ISL_429601	36	C	T	23	29890	5'UTR	36	extragenic		5'UTR:36	C36T
EPI_ISL_429601	241	C	T	228	29890	5'UTR	241	extragenic		5'UTR:241	C241T
EPI_ISL_429601	833	T	C	820	29890	NSP2	F10L	SNP	Non-Structural protein 2	NSP2:F10L	T833C
EPI_ISL_429601	1059	C	T	1046	29890	NSP2	T85I	SNP	Non-Structural protein 2	NSP2:T85I	C1059T
EPI_ISL_429601	3037	C	T	3024	29890	NSP3	F106F	SNP_silent	Predicted phosphoesterase, papain-like proteinase	NSP3:F106F	C3037T
EPI_ISL_429601	14408	C	T	14395	29890	NSP12b	P314L	SNP	RNA-dependent RNA polymerase, post-ribosomal frameshift	NSP12b:P314L	C14408T
EPI_ISL_429601	23403	A	G	23390	29890	S	D614G	SNP	Spike	S:D614G	A23403G
EPI_ISL_429601	25563	G	T	25550	29890	ORF3a	Q57H	SNP	ORF3a protein	ORF3a:Q57H	G25563T
EPI_ISL_429601	27964	C	T	27951	29890	ORF8	S24L	SNP	ORF8 protein	ORF8:S24L	C27964T
EPI_ISL_437844	30	AACC	CTTT	20	29893	5'UTR	30	extragenic		5'UTR:30	AACC30CTTT
EPI_ISL_437844	36	C	T	26	29893	5'UTR	36	extragenic		5'UTR:36	C36T
EPI_ISL_437844	241	C	T	231	29893	5'UTR	241	extragenic		5'UTR:241	C241T
EPI_ISL_437844	1059	C	T	1049	29893	NSP2	T85I	SNP	Non-Structural protein 2	NSP2:T85I	C1059T
EPI_ISL_437844	3037	C	T	3027	29893	NSP3	F106F	SNP_silent	Predicted phosphoesterase, papain-like proteinase	NSP3:F106F	C3037T
EPI_ISL_437844	14408	C	T	14398	29893	NSP12b	P314L	SNP	RNA-dependent RNA polymerase, post-ribosomal frameshift	NSP12b:P314L	C14408T
EPI_ISL_437844	16912	G	T	16902	29893	NSP13	V226L	SNP	Helicase	NSP13:V226L	G16912T
EPI_ISL_437844	23403	A	G	23393	29893	S	D614G	SNP	Spike	S:D614G	A23403G
EPI_ISL_437844	25563	G	T	25553	29893	ORF3a	Q57H	SNP	ORF3a protein	ORF3a:Q57H	G25563T
EPI_ISL_437844	29553	G	A	29543	29893	3'UTR	29553	extragenic		3'UTR:29553	G29553A
EPI_ISL_437844	29861	GG	AA	29851	29893	3'UTR	29861	extragenic		3'UTR:29861	GG29861AA
EPI_ISL_437844	29864	G	A	29854	29893	3'UTR	29864	extragenic		3'UTR:29864	G29864A
EPI_ISL_437844	29867	TG	AA	29857	29893	3'UTR	29867	extragenic		3'UTR:29867	TG29867AA
EPI_ISL_437844	29870	C	A	29860	29893	3'UTR	29870	extragenic		3'UTR:29870	C29870A
EPI_ISL_455339	30	A	T	30	29831	5'UTR	30	extragenic		5'UTR:30	A30T
EPI_ISL_455339	3188	CA	GC	3188	29831	NSP3	Q157A	SNP	Predicted phosphoesterase, papain-like proteinase	NSP3:Q157A	CA3188GC
EPI_ISL_455339	3889	A	G	3889	29831	NSP3	K390K	SNP_silent	Predicted phosphoesterase, papain-like proteinase	NSP3:K390K	A3889G
EPI_ISL_455339	3943	A	T	3943	29831	NSP3	K408N	SNP	Predicted phosphoesterase, papain-like proteinase	NSP3:K408N	A3943T
EPI_ISL_455339	4020	A	G	4020	29831	NSP3	N434S	SNP	Predicted phosphoesterase, papain-like proteinase	NSP3:N434S	A4020G
EPI_ISL_455339	8724	T	C	8724	29831	NSP4	I57T	SNP	Transmembrane protein	NSP4:I57T	T8724C
EPI_ISL_455339	8782	C	T	8782	29831	NSP4	S76S	SNP_silent	Transmembrane protein	NSP4:S76S	C8782T
EPI_ISL_455339	8854	T	G	8854	29831	NSP4	G100G	SNP_silent	Transmembrane protein	NSP4:G100G	T8854G
EPI_ISL_455339	8869	T	C	8869	29831	NSP4	G105G	SNP_silent	Transmembrane protein	NSP4:G105G	T8869C
EPI_ISL_455339	8980	C	T	8980	29831	NSP4	Y142Y	SNP_silent	Transmembrane protein	NSP4:Y142Y	C8980T
EPI_ISL_455339	9477	T	A	9477	29831	NSP4	F308Y	SNP	Transmembrane protein	NSP4:F308Y	T9477A
EPI_ISL_455339	14805	C	T	14805	29831	NSP12b	Y446Y	SNP_silent	RNA-dependent RNA polymerase, post-ribosomal frameshift	NSP12b:Y446Y	C14805T
EPI_ISL_455339	25979	G	T	25979	29831	ORF3a	G196V	SNP	ORF3a protein	ORF3a:G196V	G25979T
EPI_ISL_455339	28144	T	C	28144	29831	ORF8	L84S	SNP	ORF8 protein	ORF8:L84S	T28144C
EPI_ISL_455339	28657	C	T	28657	29831	N	D128D	SNP_silent	Nucleocapsid protein	N:D128D	C28657T
EPI_ISL_455339	28863	C	T	28863	29831	N	S197L	SNP	Nucleocapsid protein	N:S197L	C28863T
EPI_ISL_404227	31	A	G	12	29839	5'UTR	31	extragenic		5'UTR:31	A31G
EPI_ISL_404227	583	C	T	564	29839	NSP1	V106V	SNP_silent	Leader protein	NSP1:V106V	C583T
EPI_ISL_426052	31	A	T	9	29889	5'UTR	31	extragenic		5'UTR:31	A31T
EPI_ISL_426052	36	C	T	14	29889	5'UTR	36	extragenic		5'UTR:36	C36T
EPI_ISL_426052	241	C	T	219	29889	5'UTR	241	extragenic		5'UTR:241	C241T
EPI_ISL_426052	1059	C	T	1037	29889	NSP2	T85I	SNP	Non-Structural protein 2	NSP2:T85I	C1059T
EPI_ISL_426052	3037	C	T	3015	29889	NSP3	F106F	SNP_silent	Predicted phosphoesterase, papain-like proteinase	NSP3:F106F	C3037T
EPI_ISL_426052	10851	C	T	10829	29889	NSP5	A266V	SNP	3C-like proteinase	NSP5:A266V	C10851T
EPI_ISL_426052	14408	C	T	14386	29889	NSP12b	P314L	SNP	RNA-dependent RNA polymerase, post-ribosomal frameshift	NSP12b:P314L	C14408T
EPI_ISL_426052	23403	A	G	23381	29889	S	D614G	SNP	Spike	S:D614G	A23403G
EPI_ISL_426052	25563	G	T	25541	29889	ORF3a	Q57H	SNP	ORF3a protein	ORF3a:Q57H	G25563T
EPI_ISL_426053	31	A	T	25	29904	5'UTR	31	extragenic		5'UTR:31	A31T
EPI_ISL_426053	36	C	T	30	29904	5'UTR	36	extragenic		5'UTR:36	C36T
EPI_ISL_426053	241	C	T	235	29904	5'UTR	241	extragenic		5'UTR:241	C241T
EPI_ISL_426053	1059	C	T	1053	29904	NSP2	T85I	SNP	Non-Structural protein 2	NSP2:T85I	C1059T
EPI_ISL_426053	3037	C	T	3031	29904	NSP3	F106F	SNP_silent	Predicted phosphoesterase, papain-like proteinase	NSP3:F106F	C3037T
EPI_ISL_426053	3140	C	T	3134	29904	NSP3	P141S	SNP	Predicted phosphoesterase, papain-like proteinase	NSP3:P141S	C3140T
EPI_ISL_426053	9995	T	G	9989	29904	NSP4	S481A	SNP	Transmembrane protein	NSP4:S481A	T9995G
EPI_ISL_426053	14408	C	T	14402	29904	NSP12b	P314L	SNP	RNA-dependent RNA polymerase, post-ribosomal frameshift	NSP12b:P314L	C14408T
EPI_ISL_426053	16260	C	T	16254	29904	NSP13	C8C	SNP_silent	Helicase	NSP13:C8C	C16260T
EPI_ISL_426053	23403	A	G	23397	29904	S	D614G	SNP	Spike	S:D614G	A23403G
EPI_ISL_426053	25563	G	T	25557	29904	ORF3a	Q57H	SNP	ORF3a protein	ORF3a:Q57H	G25563T
EPI_ISL_426053	28821	C	A	28815	29904	N	S183Y	SNP	Nucleocapsid protein	N:S183Y	C28821A
EPI_ISL_426055	31	A	T	21	29907	5'UTR	31	extragenic		5'UTR:31	A31T
EPI_ISL_426055	34	AAC	TTT	24	29907	5'UTR	34	extragenic		5'UTR:34	AAC34TTT
EPI_ISL_426055	241	C	T	231	29907	5'UTR	241	extragenic		5'UTR:241	C241T
EPI_ISL_426055	1059	C	T	1049	29907	NSP2	T85I	SNP	Non-Structural protein 2	NSP2:T85I	C1059T
EPI_ISL_426055	3037	C	T	3027	29907	NSP3	F106F	SNP_silent	Predicted phosphoesterase, papain-like proteinase	NSP3:F106F	C3037T
EPI_ISL_426055	11916	C	T	11906	29907	NSP7	S25L	SNP	Non-Structural Protein 7	NSP7:S25L	C11916T
EPI_ISL_426055	13515	C	T	13505	29907	NSP12b	G16G	SNP_silent	RNA-dependent RNA polymerase, post-ribosomal frameshift	NSP12b:G16G	C13515T
EPI_ISL_426055	14408	C	T	14398	29907	NSP12b	P314L	SNP	RNA-dependent RNA polymerase, post-ribosomal frameshift	NSP12b:P314L	C14408T
EPI_ISL_426055	18998	C	T	18988	29907	NSP14	A320V	SNP	3'-to-5' exonuclease	NSP14:A320V	C18998T
EPI_ISL_426055	23403	A	G	23393	29907	S	D614G	SNP	Spike	S:D614G	A23403G
EPI_ISL_426055	25563	G	T	25553	29907	ORF3a	Q57H	SNP	ORF3a protein	ORF3a:Q57H	G25563T
EPI_ISL_426055	29540	G	A	29530	29907	3'UTR	29540	extragenic		3'UTR:29540	G29540A
EPI_ISL_426068	31	A	T	31	29903	5'UTR	31	extragenic		5'UTR:31	A31T
EPI_ISL_426068	36	C	T	36	29903	5'UTR	36	extragenic		5'UTR:36	C36T
EPI_ISL_426068	241	C	T	241	29903	5'UTR	241	extragenic		5'UTR:241	C241T
EPI_ISL_426068	1059	C	T	1059	29903	NSP2	T85I	SNP	Non-Structural protein 2	NSP2:T85I	C1059T
EPI_ISL_426068	3037	C	T	3037	29903	NSP3	F106F	SNP_silent	Predicted phosphoesterase, papain-like proteinase	NSP3:F106F	C3037T
EPI_ISL_426068	11289	C	T	11289	29903	NSP6	S106F	SNP	Transmembrane protein	NSP6:S106F	C11289T
EPI_ISL_426068	13170	C	T	13170	29903	NSP10	T49I	SNP	Growth-factor-like protein	NSP10:T49I	C13170T
EPI_ISL_426068	14407	CC	TT	14407	29903	NSP12b	P314F	SNP	RNA-dependent RNA polymerase, post-ribosomal frameshift	NSP12b:P314F	CC14407TT
EPI_ISL_426068	23403	A	G	23403	29903	S	D614G	SNP	Spike	S:D614G	A23403G
EPI_ISL_426068	25563	G	T	25563	29903	ORF3a	Q57H	SNP	ORF3a protein	ORF3a:Q57H	G25563T
EPI_ISL_426073	31	A	T	4	29876	5'UTR	31	extragenic		5'UTR:31	A31T
EPI_ISL_426073	36	C	T	9	29876	5'UTR	36	extragenic		5'UTR:36	C36T
EPI_ISL_426073	241	C	T	214	29876	5'UTR	241	extragenic		5'UTR:241	C241T
EPI_ISL_426073	833	T	C	806	29876	NSP2	F10L	SNP	Non-Structural protein 2	NSP2:F10L	T833C
EPI_ISL_426073	1059	C	T	1032	29876	NSP2	T85I	SNP	Non-Structural protein 2	NSP2:T85I	C1059T
EPI_ISL_426073	3037	C	T	3010	29876	NSP3	F106F	SNP_silent	Predicted phosphoesterase, papain-like proteinase	NSP3:F106F	C3037T
EPI_ISL_426073	14408	C	T	14381	29876	NSP12b	P314L	SNP	RNA-dependent RNA polymerase, post-ribosomal frameshift	NSP12b:P314L	C14408T
EPI_ISL_426073	23403	A	G	23376	29876	S	D614G	SNP	Spike	S:D614G	A23403G
EPI_ISL_426073	25563	G	T	25536	29876	ORF3a	Q57H	SNP	ORF3a protein	ORF3a:Q57H	G25563T
EPI_ISL_426073	27964	C	T	27937	29876	ORF8	S24L	SNP	ORF8 protein	ORF8:S24L	C27964T
EPI_ISL_426073	28093	C	T	28066	29876	ORF8	S67F	SNP	ORF8 protein	ORF8:S67F	C28093T
EPI_ISL_426073	29520	C	T	29493	29876	N	S416L	SNP	Nucleocapsid protein	N:S416L	C29520T
EPI_ISL_426073	29864	G	A	29837	29876	3'UTR	29864	extragenic		3'UTR:29864	G29864A
EPI_ISL_426073	29867	TG	AA	29840	29876	3'UTR	29867	extragenic		3'UTR:29867	TG29867AA
EPI_ISL_426073	29870	C	A	29843	29876	3'UTR	29870	extragenic		3'UTR:29870	C29870A
EPI_ISL_426075	31	A	T	10	29882	5'UTR	31	extragenic		5'UTR:31	A31T
EPI_ISL_426075	36	C	T	15	29882	5'UTR	36	extragenic		5'UTR:36	C36T
EPI_ISL_426075	241	C	T	220	29882	5'UTR	241	extragenic		5'UTR:241	C241T
EPI_ISL_426075	3037	C	T	3016	29882	NSP3	F106F	SNP_silent	Predicted phosphoesterase, papain-like proteinase	NSP3:F106F	C3037T
EPI_ISL_426075	14408	C	T	14387	29882	NSP12b	P314L	SNP	RNA-dependent RNA polymerase, post-ribosomal frameshift	NSP12b:P314L	C14408T
EPI_ISL_426075	20268	A	G	20247	29882	NSP15	L216L	SNP_silent	endoRNAse	NSP15:L216L	A20268G
EPI_ISL_426075	23403	A	G	23382	29882	S	D614G	SNP	Spike	S:D614G	A23403G
EPI_ISL_426075	29867	TG	AA	29846	29882	3'UTR	29867	extragenic		3'UTR:29867	TG29867AA
EPI_ISL_426075	29870	C	A	29849	29882	3'UTR	29870	extragenic		3'UTR:29870	C29870A
EPI_ISL_426134	31	A	T	31	30031	5'UTR	31	extragenic		5'UTR:31	A31T
EPI_ISL_426134	34	AAC	TTT	34	30031	5'UTR	34	extragenic		5'UTR:34	AAC34TTT
EPI_ISL_426134	241	C	T	241	30031	5'UTR	241	extragenic		5'UTR:241	C241T
EPI_ISL_426134	1059	C	T	1059	30031	NSP2	T85I	SNP	Non-Structural protein 2	NSP2:T85I	C1059T
EPI_ISL_426134	3037	C	T	3037	30031	NSP3	F106F	SNP_silent	Predicted phosphoesterase, papain-like proteinase	NSP3:F106F	C3037T
EPI_ISL_426134	14408	C	T	14408	30031	NSP12b	P314L	SNP	RNA-dependent RNA polymerase, post-ribosomal frameshift	NSP12b:P314L	C14408T
EPI_ISL_426134	21575	C	T	21575	30031	S	L5F	SNP	Spike	S:L5F	C21575T
EPI_ISL_426134	23403	A	G	23558	30031	S	D614G	SNP	Spike	S:D614G	A23403G
EPI_ISL_426134	25563	G	T	25718	30031	ORF3a	Q57H	SNP	ORF3a protein	ORF3a:Q57H	G25563T
EPI_ISL_426134	29553	G	A	29708	30031	3'UTR	29553	extragenic		3'UTR:29553	G29553A
EPI_ISL_427171	31	A	T	30	29902	5'UTR	31	extragenic		5'UTR:31	A31T
EPI_ISL_427171	36	C	T	35	29902	5'UTR	36	extragenic		5'UTR:36	C36T
EPI_ISL_427171	241	C	T	240	29902	5'UTR	241	extragenic		5'UTR:241	C241T
EPI_ISL_427171	833	T	C	832	29902	NSP2	F10L	SNP	Non-Structural protein 2	NSP2:F10L	T833C
EPI_ISL_427171	1059	C	T	1058	29902	NSP2	T85I	SNP	Non-Structural protein 2	NSP2:T85I	C1059T
EPI_ISL_427171	3037	C	T	3036	29902	NSP3	F106F	SNP_silent	Predicted phosphoesterase, papain-like proteinase	NSP3:F106F	C3037T
EPI_ISL_427171	14408	C	T	14407	29902	NSP12b	P314L	SNP	RNA-dependent RNA polymerase, post-ribosomal frameshift	NSP12b:P314L	C14408T
EPI_ISL_427171	23403	A	G	23402	29902	S	D614G	SNP	Spike	S:D614G	A23403G
EPI_ISL_427171	25563	G	T	25562	29902	ORF3a	Q57H	SNP	ORF3a protein	ORF3a:Q57H	G25563T
EPI_ISL_427171	27964	C	T	27963	29902	ORF8	S24L	SNP	ORF8 protein	ORF8:S24L	C27964T
EPI_ISL_427171	28159	A	G	28158	29902	ORF8	N89S	SNP	ORF8 protein	ORF8:N89S	A28159G
EPI_ISL_427171	29867	TG	AA	29866	29902	3'UTR	29867	extragenic		3'UTR:29867	TG29867AA
EPI_ISL_427171	29870	C	A	29869	29902	3'UTR	29870	extragenic		3'UTR:29870	C29870A
EPI_ISL_427187	31	A	T	25	29866	5'UTR	31	extragenic		5'UTR:31	A31T
EPI_ISL_427187	36	C	T	30	29866	5'UTR	36	extragenic		5'UTR:36	C36T
EPI_ISL_427187	3992	C	T	3986	29866	NSP3	T424T	SNP_silent	Predicted phosphoesterase, papain-like proteinase	NSP3:T424T	C3992T
EPI_ISL_427187	8782	C	T	8776	29866	NSP4	S76S	SNP_silent	Transmembrane protein	NSP4:S76S	C8782T
EPI_ISL_427187	17747	C	T	17741	29866	NSP13	P504L	SNP	Helicase	NSP13:P504L	C17747T
EPI_ISL_427187	17858	A	G	17852	29866	NSP13	Y541C	SNP	Helicase	NSP13:Y541C	A17858G
EPI_ISL_427187	18060	C	T	18054	29866	NSP14	L7L	SNP_silent	3'-to-5' exonuclease	NSP14:L7L	C18060T
EPI_ISL_427187	22984	G	A	22978	29866	S	Q474Q	SNP_silent	Spike	S:Q474Q	G22984A
EPI_ISL_427187	23992	A	T	23986	29866	S	S810S	SNP_silent	Spike	S:S810S	A23992T
EPI_ISL_427187	27384	T	C	27378	29866	ORF6	D61D	SNP_silent	ORF6 protein	ORF6:D61D	T27384C
EPI_ISL_427187	28144	T	C	28138	29866	ORF8	L84S	SNP	ORF8 protein	ORF8:L84S	T28144C
EPI_ISL_427204	31	A	T	7	29844	5'UTR	31	extragenic		5'UTR:31	A31T
EPI_ISL_427204	36	C	T	12	29844	5'UTR	36	extragenic		5'UTR:36	C36T
EPI_ISL_427204	5784	C	T	5760	29844	NSP3	T1022I	SNP	Predicted phosphoesterase, papain-like proteinase	NSP3:T1022I	C5784T
EPI_ISL_427204	8782	C	T	8758	29844	NSP4	S76S	SNP_silent	Transmembrane protein	NSP4:S76S	C8782T
EPI_ISL_427204	16957	G	T	16933	29844	NSP13	V241L	SNP	Helicase	NSP13:V241L	G16957T
EPI_ISL_427204	17747	C	T	17723	29844	NSP13	P504L	SNP	Helicase	NSP13:P504L	C17747T
EPI_ISL_427204	17858	A	G	17834	29844	NSP13	Y541C	SNP	Helicase	NSP13:Y541C	A17858G
EPI_ISL_427204	18060	C	T	18036	29844	NSP14	L7L	SNP_silent	3'-to-5' exonuclease	NSP14:L7L	C18060T
EPI_ISL_427204	26730	G	A	26706	29844	M	V70I	SNP	Membrane	M:V70I	G26730A
EPI_ISL_427204	28144	T	C	28120	29844	ORF8	L84S	SNP	ORF8 protein	ORF8:L84S	T28144C
EPI_ISL_427255	31	A	T	9	29854	5'UTR	31	extragenic		5'UTR:31	A31T
EPI_ISL_427255	34	AAC	TTT	12	29854	5'UTR	34	extragenic		5'UTR:34	AAC34TTT
EPI_ISL_427255	241	C	T	219	29854	5'UTR	241	extragenic		5'UTR:241	C241T
EPI_ISL_427255	1059	C	T	1037	29854	NSP2	T85I	SNP	Non-Structural protein 2	NSP2:T85I	C1059T
EPI_ISL_427255	3037	C	T	3015	29854	NSP3	F106F	SNP_silent	Predicted phosphoesterase, papain-like proteinase	NSP3:F106F	C3037T
EPI_ISL_427255	12880	C	T	12858	29854	NSP9	I65I	SNP_silent	ssRNA-binding protein	NSP9:I65I	C12880T
EPI_ISL_427255	14408	C	T	14386	29854	NSP12b	P314L	SNP	RNA-dependent RNA polymerase, post-ribosomal frameshift	NSP12b:P314L	C14408T
EPI_ISL_427255	23403	A	G	23381	29854	S	D614G	SNP	Spike	S:D614G	A23403G
EPI_ISL_427255	25563	G	T	25541	29854	ORF3a	Q57H	SNP	ORF3a protein	ORF3a:Q57H	G25563T
EPI_ISL_427255	29553	G	A	29531	29854	3'UTR	29553	extragenic		3'UTR:29553	G29553A
EPI_ISL_427257	31	A	T	21	29862	5'UTR	31	extragenic		5'UTR:31	A31T
EPI_ISL_427257	34	AAC	TTT	24	29862	5'UTR	34	extragenic		5'UTR:34	AAC34TTT
EPI_ISL_427257	241	C	T	231	29862	5'UTR	241	extragenic		5'UTR:241	C241T
EPI_ISL_427257	1059	C	T	1049	29862	NSP2	T85I	SNP	Non-Structural protein 2	NSP2:T85I	C1059T
EPI_ISL_427257	3037	C	T	3027	29862	NSP3	F106F	SNP_silent	Predicted phosphoesterase, papain-like proteinase	NSP3:F106F	C3037T
EPI_ISL_427257	14408	C	T	14398	29862	NSP12b	P314L	SNP	RNA-dependent RNA polymerase, post-ribosomal frameshift	NSP12b:P314L	C14408T
EPI_ISL_427257	23403	A	G	23393	29862	S	D614G	SNP	Spike	S:D614G	A23403G
EPI_ISL_427257	25563	G	T	25553	29862	ORF3a	Q57H	SNP	ORF3a protein	ORF3a:Q57H	G25563T
EPI_ISL_427262	31	A	T	24	29872	5'UTR	31	extragenic		5'UTR:31	A31T
EPI_ISL_427262	34	AAC	TTT	27	29872	5'UTR	34	extragenic		5'UTR:34	AAC34TTT
EPI_ISL_427262	241	C	T	234	29872	5'UTR	241	extragenic		5'UTR:241	C241T
EPI_ISL_427262	1059	C	T	1052	29872	NSP2	T85I	SNP	Non-Structural protein 2	NSP2:T85I	C1059T
EPI_ISL_427262	3037	C	T	3030	29872	NSP3	F106F	SNP_silent	Predicted phosphoesterase, papain-like proteinase	NSP3:F106F	C3037T
EPI_ISL_427262	14408	C	T	14401	29872	NSP12b	P314L	SNP	RNA-dependent RNA polymerase, post-ribosomal frameshift	NSP12b:P314L	C14408T
EPI_ISL_427262	23403	A	G	23396	29872	S	D614G	SNP	Spike	S:D614G	A23403G
EPI_ISL_427262	25563	G	T	25556	29872	ORF3a	Q57H	SNP	ORF3a protein	ORF3a:Q57H	G25563T
EPI_ISL_427264	31	A	T	30	29864	5'UTR	31	extragenic		5'UTR:31	A31T
EPI_ISL_427264	34	AAC	TTT	33	29864	5'UTR	34	extragenic		5'UTR:34	AAC34TTT
EPI_ISL_427264	241	C	T	240	29864	5'UTR	241	extragenic		5'UTR:241	C241T
EPI_ISL_427264	684	TAAAGTCAT	.	682	29864	NSP1	K141	deletion	Leader protein	NSP1:K141	TAAAGTCAT684.
EPI_ISL_427264	3037	C	T	3027	29864	NSP3	F106F	SNP_silent	Predicted phosphoesterase, papain-like proteinase	NSP3:F106F	C3037T
EPI_ISL_427264	6636	C	T	6626	29864	NSP3	T1306I	SNP	Predicted phosphoesterase, papain-like proteinase	NSP3:T1306I	C6636T
EPI_ISL_427264	14408	C	T	14398	29864	NSP12b	P314L	SNP	RNA-dependent RNA polymerase, post-ribosomal frameshift	NSP12b:P314L	C14408T
EPI_ISL_427264	18877	C	T	18867	29864	NSP14	C279C	SNP_silent	3'-to-5' exonuclease	NSP14:C279C	C18877T
EPI_ISL_427264	21575	C	T	21565	29864	S	L5F	SNP	Spike	S:L5F	C21575T
EPI_ISL_427264	23403	A	G	23393	29864	S	D614G	SNP	Spike	S:D614G	A23403G
EPI_ISL_427264	25563	G	T	25553	29864	ORF3a	Q57H	SNP	ORF3a protein	ORF3a:Q57H	G25563T
EPI_ISL_429600	31	A	T	11	29883	5'UTR	31	extragenic		5'UTR:31	A31T
EPI_ISL_429600	36	C	T	16	29883	5'UTR	36	extragenic		5'UTR:36	C36T
EPI_ISL_429600	241	C	T	221	29883	5'UTR	241	extragenic		5'UTR:241	C241T
EPI_ISL_429600	1059	C	T	1039	29883	NSP2	T85I	SNP	Non-Structural protein 2	NSP2:T85I	C1059T
EPI_ISL_429600	3037	C	T	3017	29883	NSP3	F106F	SNP_silent	Predicted phosphoesterase, papain-like proteinase	NSP3:F106F	C3037T
EPI_ISL_429600	14408	C	T	14388	29883	NSP12b	P314L	SNP	RNA-dependent RNA polymerase, post-ribosomal frameshift	NSP12b:P314L	C14408T
EPI_ISL_429600	16750	C	T	16730	29883	NSP13	P172S	SNP	Helicase	NSP13:P172S	C16750T
EPI_ISL_429600	23403	A	G	23383	29883	S	D614G	SNP	Spike	S:D614G	A23403G
EPI_ISL_429600	25563	G	T	25543	29883	ORF3a	Q57H	SNP	ORF3a protein	ORF3a:Q57H	G25563T
EPI_ISL_429600	29553	G	A	29533	29883	3'UTR	29553	extragenic		3'UTR:29553	G29553A
EPI_ISL_430880	31	A	T	30	29875	5'UTR	31	extragenic		5'UTR:31	A31T
EPI_ISL_430880	36	C	T	35	29875	5'UTR	36	extragenic		5'UTR:36	C36T
EPI_ISL_430880	241	C	T	240	29875	5'UTR	241	extragenic		5'UTR:241	C241T
EPI_ISL_430880	1059	C	T	1058	29875	NSP2	T85I	SNP	Non-Structural protein 2	NSP2:T85I	C1059T
EPI_ISL_430880	3037	C	T	3036	29875	NSP3	F106F	SNP_silent	Predicted phosphoesterase, papain-like proteinase	NSP3:F106F	C3037T
EPI_ISL_430880	14408	C	T	14407	29875	NSP12b	P314L	SNP	RNA-dependent RNA polymerase, post-ribosomal frameshift	NSP12b:P314L	C14408T
EPI_ISL_430880	23403	A	G	23402	29875	S	D614G	SNP	Spike	S:D614G	A23403G
EPI_ISL_430880	25563	G	T	25562	29875	ORF3a	Q57H	SNP	ORF3a protein	ORF3a:Q57H	G25563T
EPI_ISL_430880	29553	G	A	29552	29875	3'UTR	29553	extragenic		3'UTR:29553	G29553A
EPI_ISL_430885	31	A	T	26	29871	5'UTR	31	extragenic		5'UTR:31	A31T
EPI_ISL_430885	36	C	T	31	29871	5'UTR	36	extragenic		5'UTR:36	C36T
EPI_ISL_430885	241	C	T	236	29871	5'UTR	241	extragenic		5'UTR:241	C241T
EPI_ISL_430885	1059	C	T	1054	29871	NSP2	T85I	SNP	Non-Structural protein 2	NSP2:T85I	C1059T
EPI_ISL_430885	3037	C	T	3032	29871	NSP3	F106F	SNP_silent	Predicted phosphoesterase, papain-like proteinase	NSP3:F106F	C3037T
EPI_ISL_430885	14408	C	T	14403	29871	NSP12b	P314L	SNP	RNA-dependent RNA polymerase, post-ribosomal frameshift	NSP12b:P314L	C14408T
EPI_ISL_430885	23403	A	G	23398	29871	S	D614G	SNP	Spike	S:D614G	A23403G
EPI_ISL_430885	25563	G	T	25558	29871	ORF3a	Q57H	SNP	ORF3a protein	ORF3a:Q57H	G25563T
EPI_ISL_430885	29553	G	A	29548	29871	3'UTR	29553	extragenic		3'UTR:29553	G29553A
EPI_ISL_430898	31	A	T	9	29856	5'UTR	31	extragenic		5'UTR:31	A31T
EPI_ISL_430898	34	AAC	TTT	12	29856	5'UTR	34	extragenic		5'UTR:34	AAC34TTT
EPI_ISL_430898	241	C	T	219	29856	5'UTR	241	extragenic		5'UTR:241	C241T
EPI_ISL_430898	1059	C	T	1037	29856	NSP2	T85I	SNP	Non-Structural protein 2	NSP2:T85I	C1059T
EPI_ISL_430898	1437	C	T	1415	29856	NSP2	S211F	SNP	Non-Structural protein 2	NSP2:S211F	C1437T
EPI_ISL_430898	3037	C	T	3015	29856	NSP3	F106F	SNP_silent	Predicted phosphoesterase, papain-like proteinase	NSP3:F106F	C3037T
EPI_ISL_430898	6040	C	T	6018	29856	NSP3	F1107F	SNP_silent	Predicted phosphoesterase, papain-like proteinase	NSP3:F1107F	C6040T
EPI_ISL_430898	11036	C	T	11014	29856	NSP6	L22F	SNP	Transmembrane protein	NSP6:L22F	C11036T
EPI_ISL_430898	14408	C	T	14386	29856	NSP12b	P314L	SNP	RNA-dependent RNA polymerase, post-ribosomal frameshift	NSP12b:P314L	C14408T
EPI_ISL_430898	23403	A	G	23381	29856	S	D614G	SNP	Spike	S:D614G	A23403G
EPI_ISL_430898	25563	G	T	25541	29856	ORF3a	Q57H	SNP	ORF3a protein	ORF3a:Q57H	G25563T
EPI_ISL_430920	31	A	T	12	29861	5'UTR	31	extragenic		5'UTR:31	A31T
EPI_ISL_430920	34	AAC	TTT	15	29861	5'UTR	34	extragenic		5'UTR:34	AAC34TTT
EPI_ISL_430920	241	C	T	222	29861	5'UTR	241	extragenic		5'UTR:241	C241T
EPI_ISL_430920	1059	C	T	1040	29861	NSP2	T85I	SNP	Non-Structural protein 2	NSP2:T85I	C1059T
EPI_ISL_430920	3037	C	T	3018	29861	NSP3	F106F	SNP_silent	Predicted phosphoesterase, papain-like proteinase	NSP3:F106F	C3037T
EPI_ISL_430920	14408	C	T	14389	29861	NSP12b	P314L	SNP	RNA-dependent RNA polymerase, post-ribosomal frameshift	NSP12b:P314L	C14408T
EPI_ISL_430920	20134	G	T	20115	29861	NSP15	V172L	SNP	endoRNAse	NSP15:V172L	G20134T
EPI_ISL_430920	23403	A	G	23384	29861	S	D614G	SNP	Spike	S:D614G	A23403G
EPI_ISL_430920	25563	G	T	25544	29861	ORF3a	Q57H	SNP	ORF3a protein	ORF3a:Q57H	G25563T
EPI_ISL_430921	31	A	T	31	29903	5'UTR	31	extragenic		5'UTR:31	A31T
EPI_ISL_430921	34	AAC	TTT	34	29903	5'UTR	34	extragenic		5'UTR:34	AAC34TTT
EPI_ISL_430921	241	C	T	241	29903	5'UTR	241	extragenic		5'UTR:241	C241T
EPI_ISL_430921	1059	C	T	1059	29903	NSP2	T85I	SNP	Non-Structural protein 2	NSP2:T85I	C1059T
EPI_ISL_430921	3037	C	T	3037	29903	NSP3	F106F	SNP_silent	Predicted phosphoesterase, papain-like proteinase	NSP3:F106F	C3037T
EPI_ISL_430921	10851	C	T	10851	29903	NSP5	A266V	SNP	3C-like proteinase	NSP5:A266V	C10851T
EPI_ISL_430921	14408	C	T	14408	29903	NSP12b	P314L	SNP	RNA-dependent RNA polymerase, post-ribosomal frameshift	NSP12b:P314L	C14408T
EPI_ISL_430921	16975	G	T	16975	29903	NSP13	V247F	SNP	Helicase	NSP13:V247F	G16975T
EPI_ISL_430921	23403	A	G	23403	29903	S	D614G	SNP	Spike	S:D614G	A23403G
EPI_ISL_430921	25563	G	T	25563	29903	ORF3a	Q57H	SNP	ORF3a protein	ORF3a:Q57H	G25563T
EPI_ISL_430922	31	A	T	25	29866	5'UTR	31	extragenic		5'UTR:31	A31T
EPI_ISL_430922	36	C	T	30	29866	5'UTR	36	extragenic		5'UTR:36	C36T
EPI_ISL_430922	241	C	T	235	29866	5'UTR	241	extragenic		5'UTR:241	C241T
EPI_ISL_430922	3037	C	T	3031	29866	NSP3	F106F	SNP_silent	Predicted phosphoesterase, papain-like proteinase	NSP3:F106F	C3037T
EPI_ISL_430922	14235	C	T	14229	29866	NSP12b	Y256Y	SNP_silent	RNA-dependent RNA polymerase, post-ribosomal frameshift	NSP12b:Y256Y	C14235T
EPI_ISL_430922	14408	C	T	14402	29866	NSP12b	P314L	SNP	RNA-dependent RNA polymerase, post-ribosomal frameshift	NSP12b:P314L	C14408T
EPI_ISL_430922	18877	C	T	18871	29866	NSP14	C279C	SNP_silent	3'-to-5' exonuclease	NSP14:C279C	C18877T
EPI_ISL_430922	23403	A	G	23397	29866	S	D614G	SNP	Spike	S:D614G	A23403G
EPI_ISL_430922	25563	G	T	25557	29866	ORF3a	Q57H	SNP	ORF3a protein	ORF3a:Q57H	G25563T
EPI_ISL_430924	31	A	T	10	29834	5'UTR	31	extragenic		5'UTR:31	A31T
EPI_ISL_430924	34	AAC	TTT	13	29834	5'UTR	34	extragenic		5'UTR:34	AAC34TTT
EPI_ISL_430924	509	GGTCATGTTATGGTT	.	487	29834	NSP1	G82	deletion	Leader protein	NSP1:G82	GGTCATGTTATGGTT509.
EPI_ISL_430924	8782	C	T	8746	29834	NSP4	S76S	SNP_silent	Transmembrane protein	NSP4:S76S	C8782T
EPI_ISL_430924	10844	A	G	10808	29834	NSP5	M264V	SNP	3C-like proteinase	NSP5:M264V	A10844G
EPI_ISL_430924	15982	G	T	15946	29834	NSP12b	V839L	SNP	RNA-dependent RNA polymerase, post-ribosomal frameshift	NSP12b:V839L	G15982T
EPI_ISL_430924	17747	C	T	17711	29834	NSP13	P504L	SNP	Helicase	NSP13:P504L	C17747T
EPI_ISL_430924	17858	A	G	17822	29834	NSP13	Y541C	SNP	Helicase	NSP13:Y541C	A17858G
EPI_ISL_430924	18060	C	T	18024	29834	NSP14	L7L	SNP_silent	3'-to-5' exonuclease	NSP14:L7L	C18060T
EPI_ISL_430924	28144	T	C	28108	29834	ORF8	L84S	SNP	ORF8 protein	ORF8:L84S	T28144C
EPI_ISL_430928	31	A	T	12	29902	5'UTR	31	extragenic		5'UTR:31	A31T
EPI_ISL_430928	36	C	T	17	29902	5'UTR	36	extragenic		5'UTR:36	C36T
EPI_ISL_430928	241	C	T	222	29902	5'UTR	241	extragenic		5'UTR:241	C241T
EPI_ISL_430928	1059	C	T	1040	29902	NSP2	T85I	SNP	Non-Structural protein 2	NSP2:T85I	C1059T
EPI_ISL_430928	1117	T	C	1098	29902	NSP2	I104I	SNP_silent	Non-Structural protein 2	NSP2:I104I	T1117C
EPI_ISL_430928	3037	C	T	3018	29902	NSP3	F106F	SNP_silent	Predicted phosphoesterase, papain-like proteinase	NSP3:F106F	C3037T
EPI_ISL_430928	12880	C	T	12861	29902	NSP9	I65I	SNP_silent	ssRNA-binding protein	NSP9:I65I	C12880T
EPI_ISL_430928	14408	C	T	14389	29902	NSP12b	P314L	SNP	RNA-dependent RNA polymerase, post-ribosomal frameshift	NSP12b:P314L	C14408T
EPI_ISL_430928	23403	A	G	23384	29902	S	D614G	SNP	Spike	S:D614G	A23403G
EPI_ISL_430928	25563	G	T	25544	29902	ORF3a	Q57H	SNP	ORF3a protein	ORF3a:Q57H	G25563T
EPI_ISL_430928	29553	G	A	29534	29902	3'UTR	29553	extragenic		3'UTR:29553	G29553A
EPI_ISL_430928	29861	GG	AA	29842	29902	3'UTR	29861	extragenic		3'UTR:29861	GG29861AA
EPI_ISL_430928	29864	G	A	29845	29902	3'UTR	29864	extragenic		3'UTR:29864	G29864A
EPI_ISL_430928	29867	TG	AA	29848	29902	3'UTR	29867	extragenic		3'UTR:29867	TG29867AA
EPI_ISL_430928	29870	C	A	29851	29902	3'UTR	29870	extragenic		3'UTR:29870	C29870A
EPI_ISL_430931	31	A	T	15	29846	5'UTR	31	extragenic		5'UTR:31	A31T
EPI_ISL_430931	36	C	T	20	29846	5'UTR	36	extragenic		5'UTR:36	C36T
EPI_ISL_430931	241	C	T	225	29846	5'UTR	241	extragenic		5'UTR:241	C241T
EPI_ISL_430931	1059	C	T	1043	29846	NSP2	T85I	SNP	Non-Structural protein 2	NSP2:T85I	C1059T
EPI_ISL_430931	3037	C	T	3021	29846	NSP3	F106F	SNP_silent	Predicted phosphoesterase, papain-like proteinase	NSP3:F106F	C3037T
EPI_ISL_430931	13554	C	T	13538	29846	NSP12b	Y29Y	SNP_silent	RNA-dependent RNA polymerase, post-ribosomal frameshift	NSP12b:Y29Y	C13554T
EPI_ISL_430931	14408	C	T	14392	29846	NSP12b	P314L	SNP	RNA-dependent RNA polymerase, post-ribosomal frameshift	NSP12b:P314L	C14408T
EPI_ISL_430931	23403	A	G	23387	29846	S	D614G	SNP	Spike	S:D614G	A23403G
EPI_ISL_430931	25563	G	T	25547	29846	ORF3a	Q57H	SNP	ORF3a protein	ORF3a:Q57H	G25563T
EPI_ISL_430931	27804	C	T	27788	29846	ORF7b	F16F	SNP_silent	ORF7b protein	ORF7b:F16F	C27804T
EPI_ISL_430931	29553	G	A	29537	29846	3'UTR	29553	extragenic		3'UTR:29553	G29553A
EPI_ISL_430932	31	A	T	25	29897	5'UTR	31	extragenic		5'UTR:31	A31T
EPI_ISL_430932	36	C	T	30	29897	5'UTR	36	extragenic		5'UTR:36	C36T
EPI_ISL_430932	241	C	T	235	29897	5'UTR	241	extragenic		5'UTR:241	C241T
EPI_ISL_430932	1059	C	T	1053	29897	NSP2	T85I	SNP	Non-Structural protein 2	NSP2:T85I	C1059T
EPI_ISL_430932	3037	C	T	3031	29897	NSP3	F106F	SNP_silent	Predicted phosphoesterase, papain-like proteinase	NSP3:F106F	C3037T
EPI_ISL_430932	4084	C	T	4078	29897	NSP3	D455D	SNP_silent	Predicted phosphoesterase, papain-like proteinase	NSP3:D455D	C4084T
EPI_ISL_430932	14408	C	T	14402	29897	NSP12b	P314L	SNP	RNA-dependent RNA polymerase, post-ribosomal frameshift	NSP12b:P314L	C14408T
EPI_ISL_430932	23403	A	G	23397	29897	S	D614G	SNP	Spike	S:D614G	A23403G
EPI_ISL_430932	25563	G	T	25557	29897	ORF3a	Q57H	SNP	ORF3a protein	ORF3a:Q57H	G25563T
EPI_ISL_430932	29553	G	A	29547	29897	3'UTR	29553	extragenic		3'UTR:29553	G29553A
EPI_ISL_430936	31	A	T	23	29882	5'UTR	31	extragenic		5'UTR:31	A31T
EPI_ISL_430936	34	A	T	26	29882	5'UTR	34	extragenic		5'UTR:34	A34T
EPI_ISL_430936	36	C	T	28	29882	5'UTR	36	extragenic		5'UTR:36	C36T
EPI_ISL_430936	241	C	T	233	29882	5'UTR	241	extragenic		5'UTR:241	C241T
EPI_ISL_430936	1059	C	T	1051	29882	NSP2	T85I	SNP	Non-Structural protein 2	NSP2:T85I	C1059T
EPI_ISL_430936	3037	C	T	3029	29882	NSP3	F106F	SNP_silent	Predicted phosphoesterase, papain-like proteinase	NSP3:F106F	C3037T
EPI_ISL_430936	14408	C	T	14400	29882	NSP12b	P314L	SNP	RNA-dependent RNA polymerase, post-ribosomal frameshift	NSP12b:P314L	C14408T
EPI_ISL_430936	23403	A	G	23395	29882	S	D614G	SNP	Spike	S:D614G	A23403G
EPI_ISL_430936	25563	G	T	25555	29882	ORF3a	Q57H	SNP	ORF3a protein	ORF3a:Q57H	G25563T
EPI_ISL_430937	31	A	T	22	29863	5'UTR	31	extragenic		5'UTR:31	A31T
EPI_ISL_430937	36	C	T	27	29863	5'UTR	36	extragenic		5'UTR:36	C36T
EPI_ISL_430937	241	C	T	232	29863	5'UTR	241	extragenic		5'UTR:241	C241T
EPI_ISL_430937	740	G	A	731	29863	NSP1	E159K	SNP	Leader protein	NSP1:E159K	G740A
EPI_ISL_430937	872	G	T	863	29863	NSP2	D23Y	SNP	Non-Structural protein 2	NSP2:D23Y	G872T
EPI_ISL_430937	1059	C	T	1050	29863	NSP2	T85I	SNP	Non-Structural protein 2	NSP2:T85I	C1059T
EPI_ISL_430937	3037	C	T	3028	29863	NSP3	F106F	SNP_silent	Predicted phosphoesterase, papain-like proteinase	NSP3:F106F	C3037T
EPI_ISL_430937	12880	C	T	12871	29863	NSP9	I65I	SNP_silent	ssRNA-binding protein	NSP9:I65I	C12880T
EPI_ISL_430937	14408	C	T	14399	29863	NSP12b	P314L	SNP	RNA-dependent RNA polymerase, post-ribosomal frameshift	NSP12b:P314L	C14408T
EPI_ISL_430937	23403	A	G	23394	29863	S	D614G	SNP	Spike	S:D614G	A23403G
EPI_ISL_430937	25563	G	T	25554	29863	ORF3a	Q57H	SNP	ORF3a protein	ORF3a:Q57H	G25563T
EPI_ISL_430937	28899	G	C	28890	29863	N	R209T	SNP	Nucleocapsid protein	N:R209T	G28899C
EPI_ISL_430937	28985	G	T	28976	29863	N	G238C	SNP	Nucleocapsid protein	N:G238C	G28985T
EPI_ISL_430937	29553	G	A	29544	29863	3'UTR	29553	extragenic		3'UTR:29553	G29553A
EPI_ISL_430940	31	A	T	23	29895	5'UTR	31	extragenic		5'UTR:31	A31T
EPI_ISL_430940	34	AAC	TTT	26	29895	5'UTR	34	extragenic		5'UTR:34	AAC34TTT
EPI_ISL_430940	241	C	T	233	29895	5'UTR	241	extragenic		5'UTR:241	C241T
EPI_ISL_430940	833	T	C	825	29895	NSP2	F10L	SNP	Non-Structural protein 2	NSP2:F10L	T833C
EPI_ISL_430940	1059	C	T	1051	29895	NSP2	T85I	SNP	Non-Structural protein 2	NSP2:T85I	C1059T
EPI_ISL_430940	3037	C	T	3029	29895	NSP3	F106F	SNP_silent	Predicted phosphoesterase, papain-like proteinase	NSP3:F106F	C3037T
EPI_ISL_430940	14408	C	T	14400	29895	NSP12b	P314L	SNP	RNA-dependent RNA polymerase, post-ribosomal frameshift	NSP12b:P314L	C14408T
EPI_ISL_430940	23403	A	G	23395	29895	S	D614G	SNP	Spike	S:D614G	A23403G
EPI_ISL_430940	25563	G	T	25555	29895	ORF3a	Q57H	SNP	ORF3a protein	ORF3a:Q57H	G25563T
EPI_ISL_430940	27964	C	T	27956	29895	ORF8	S24L	SNP	ORF8 protein	ORF8:S24L	C27964T
EPI_ISL_430940	29868	G	A	29860	29895	3'UTR	29868	extragenic		3'UTR:29868	G29868A
EPI_ISL_430940	29870	C	A	29862	29895	3'UTR	29870	extragenic		3'UTR:29870	C29870A
EPI_ISL_430959	31	A	T	19	29902	5'UTR	31	extragenic		5'UTR:31	A31T
EPI_ISL_430959	36	C	T	24	29902	5'UTR	36	extragenic		5'UTR:36	C36T
EPI_ISL_430959	241	C	T	229	29902	5'UTR	241	extragenic		5'UTR:241	C241T
EPI_ISL_430959	313	C	T	301	29902	NSP1	L16L	SNP_silent	Leader protein	NSP1:L16L	C313T
EPI_ISL_430959	3037	C	T	3025	29902	NSP3	F106F	SNP_silent	Predicted phosphoesterase, papain-like proteinase	NSP3:F106F	C3037T
EPI_ISL_430959	3096	C	T	3084	29902	NSP3	S126L	SNP	Predicted phosphoesterase, papain-like proteinase	NSP3:S126L	C3096T
EPI_ISL_430959	14408	C	T	14396	29902	NSP12b	P314L	SNP	RNA-dependent RNA polymerase, post-ribosomal frameshift	NSP12b:P314L	C14408T
EPI_ISL_430959	23403	A	G	23391	29902	S	D614G	SNP	Spike	S:D614G	A23403G
EPI_ISL_430959	28881	GGG	AAC	28869	29902	N	RG203KR	SNP	Nucleocapsid protein	N:RG203KR	GGG28881AAC
EPI_ISL_430959	29762	CAGTG	.	29749	29902	3'UTR	29762	extragenic		3'UTR:29762	CAGTG29762.
EPI_ISL_435151	31	A	G	31	29879	5'UTR	31	extragenic		5'UTR:31	A31G
EPI_ISL_435151	36	C	G	36	29879	5'UTR	36	extragenic		5'UTR:36	C36G
EPI_ISL_435151	241	C	T	241	29879	5'UTR	241	extragenic		5'UTR:241	C241T
EPI_ISL_435151	3037	C	T	3037	29879	NSP3	F106F	SNP_silent	Predicted phosphoesterase, papain-like proteinase	NSP3:F106F	C3037T
EPI_ISL_435151	4955	G	A	4955	29879	NSP3	E746K	SNP	Predicted phosphoesterase, papain-like proteinase	NSP3:E746K	G4955A
EPI_ISL_435151	5986	C	T	5986	29879	NSP3	F1089F	SNP_silent	Predicted phosphoesterase, papain-like proteinase	NSP3:F1089F	C5986T
EPI_ISL_435151	14408	C	T	14408	29879	NSP12b	P314L	SNP	RNA-dependent RNA polymerase, post-ribosomal frameshift	NSP12b:P314L	C14408T
EPI_ISL_435151	18020	G	A	18020	29879	NSP13	R595K	SNP	Helicase	NSP13:R595K	G18020A
EPI_ISL_435151	23403	A	G	23403	29879	S	D614G	SNP	Spike	S:D614G	A23403G
EPI_ISL_435151	28881	GGG	AAC	28881	29879	N	RG203KR	SNP	Nucleocapsid protein	N:RG203KR	GGG28881AAC
EPI_ISL_435151	29701	G	T	29701	29879	3'UTR	29701	extragenic		3'UTR:29701	G29701T
EPI_ISL_436729	31	A	G	31	29873	5'UTR	31	extragenic		5'UTR:31	A31G
EPI_ISL_436729	241	C	T	241	29873	5'UTR	241	extragenic		5'UTR:241	C241T
EPI_ISL_436729	3037	C	T	3037	29873	NSP3	F106F	SNP_silent	Predicted phosphoesterase, papain-like proteinase	NSP3:F106F	C3037T
EPI_ISL_436729	3045	C	T	3045	29873	NSP3	P109L	SNP	Predicted phosphoesterase, papain-like proteinase	NSP3:P109L	C3045T
EPI_ISL_436729	6449	C	T	6449	29873	NSP3	L1244F	SNP	Predicted phosphoesterase, papain-like proteinase	NSP3:L1244F	C6449T
EPI_ISL_436729	14408	C	T	14408	29873	NSP12b	P314L	SNP	RNA-dependent RNA polymerase, post-ribosomal frameshift	NSP12b:P314L	C14408T
EPI_ISL_436729	23403	A	G	23403	29873	S	D614G	SNP	Spike	S:D614G	A23403G
EPI_ISL_436729	28881	GGG	AAC	28881	29873	N	RG203KR	SNP	Nucleocapsid protein	N:RG203KR	GGG28881AAC
EPI_ISL_437835	31	A	T	8	29852	5'UTR	31	extragenic		5'UTR:31	A31T
EPI_ISL_437835	36	C	T	13	29852	5'UTR	36	extragenic		5'UTR:36	C36T
EPI_ISL_437835	241	C	T	218	29852	5'UTR	241	extragenic		5'UTR:241	C241T
EPI_ISL_437835	833	T	C	810	29852	NSP2	F10L	SNP	Non-Structural protein 2	NSP2:F10L	T833C
EPI_ISL_437835	1059	C	T	1036	29852	NSP2	T85I	SNP	Non-Structural protein 2	NSP2:T85I	C1059T
EPI_ISL_437835	3037	C	T	3014	29852	NSP3	F106F	SNP_silent	Predicted phosphoesterase, papain-like proteinase	NSP3:F106F	C3037T
EPI_ISL_437835	14408	C	T	14385	29852	NSP12b	P314L	SNP	RNA-dependent RNA polymerase, post-ribosomal frameshift	NSP12b:P314L	C14408T
EPI_ISL_437835	23403	A	G	23380	29852	S	D614G	SNP	Spike	S:D614G	A23403G
EPI_ISL_437835	25563	G	T	25540	29852	ORF3a	Q57H	SNP	ORF3a protein	ORF3a:Q57H	G25563T
EPI_ISL_437835	27964	C	T	27941	29852	ORF8	S24L	SNP	ORF8 protein	ORF8:S24L	C27964T
EPI_ISL_437835	29543	G	T	29520	29852	3'UTR	29543	extragenic		3'UTR:29543	G29543T
EPI_ISL_437851	31	A	T	30	29920	5'UTR	31	extragenic		5'UTR:31	A31T
EPI_ISL_437851	36	C	T	35	29920	5'UTR	36	extragenic		5'UTR:36	C36T
EPI_ISL_437851	241	C	T	240	29920	5'UTR	241	extragenic		5'UTR:241	C241T
EPI_ISL_437851	1059	C	T	1058	29920	NSP2	T85I	SNP	Non-Structural protein 2	NSP2:T85I	C1059T
EPI_ISL_437851	3037	C	T	3036	29920	NSP3	F106F	SNP_silent	Predicted phosphoesterase, papain-like proteinase	NSP3:F106F	C3037T
EPI_ISL_437851	12880	C	T	12879	29920	NSP9	I65I	SNP_silent	ssRNA-binding protein	NSP9:I65I	C12880T
EPI_ISL_437851	14408	C	T	14407	29920	NSP12b	P314L	SNP	RNA-dependent RNA polymerase, post-ribosomal frameshift	NSP12b:P314L	C14408T
EPI_ISL_437851	23403	A	G	23402	29920	S	D614G	SNP	Spike	S:D614G	A23403G
EPI_ISL_437851	25563	G	T	25562	29920	ORF3a	Q57H	SNP	ORF3a protein	ORF3a:Q57H	G25563T
EPI_ISL_437851	29553	G	A	29552	29920	3'UTR	29553	extragenic		3'UTR:29553	G29553A
EPI_ISL_437851	29867	TG	AA	29866	29920	3'UTR	29867	extragenic		3'UTR:29867	TG29867AA
EPI_ISL_437851	29870	C	A	29869	29920	3'UTR	29870	extragenic		3'UTR:29870	C29870A
EPI_ISL_437853	31	A	T	31	29917	5'UTR	31	extragenic		5'UTR:31	A31T
EPI_ISL_437853	36	C	T	36	29917	5'UTR	36	extragenic		5'UTR:36	C36T
EPI_ISL_437853	241	C	T	241	29917	5'UTR	241	extragenic		5'UTR:241	C241T
EPI_ISL_437853	1059	C	T	1059	29917	NSP2	T85I	SNP	Non-Structural protein 2	NSP2:T85I	C1059T
EPI_ISL_437853	3037	C	T	3037	29917	NSP3	F106F	SNP_silent	Predicted phosphoesterase, papain-like proteinase	NSP3:F106F	C3037T
EPI_ISL_437853	14408	C	T	14408	29917	NSP12b	P314L	SNP	RNA-dependent RNA polymerase, post-ribosomal frameshift	NSP12b:P314L	C14408T
EPI_ISL_437853	23403	A	G	23403	29917	S	D614G	SNP	Spike	S:D614G	A23403G
EPI_ISL_437853	25563	G	T	25563	29917	ORF3a	Q57H	SNP	ORF3a protein	ORF3a:Q57H	G25563T
EPI_ISL_437853	27804	C	T	27804	29917	ORF7b	F16F	SNP_silent	ORF7b protein	ORF7b:F16F	C27804T
EPI_ISL_437853	29553	G	A	29553	29917	3'UTR	29553	extragenic		3'UTR:29553	G29553A
EPI_ISL_437857	31	A	T	18	29901	5'UTR	31	extragenic		5'UTR:31	A31T
EPI_ISL_437857	34	AAC	TTT	21	29901	5'UTR	34	extragenic		5'UTR:34	AAC34TTT
EPI_ISL_437857	2274	A	C	2261	29901	NSP2	E490A	SNP	Non-Structural protein 2	NSP2:E490A	A2274C
EPI_ISL_437857	8782	C	T	8769	29901	NSP4	S76S	SNP_silent	Transmembrane protein	NSP4:S76S	C8782T
EPI_ISL_437857	17747	C	T	17734	29901	NSP13	P504L	SNP	Helicase	NSP13:P504L	C17747T
EPI_ISL_437857	17858	A	G	17845	29901	NSP13	Y541C	SNP	Helicase	NSP13:Y541C	A17858G
EPI_ISL_437857	18060	C	T	18047	29901	NSP14	L7L	SNP_silent	3'-to-5' exonuclease	NSP14:L7L	C18060T
EPI_ISL_437857	18345	T	C	18332	29901	NSP14	G102G	SNP_silent	3'-to-5' exonuclease	NSP14:G102G	T18345C
EPI_ISL_437857	23010	T	C	22997	29901	S	V483A	SNP	Spike	S:V483A	T23010C
EPI_ISL_437857	23427	T	C	23414	29901	S	V622A	SNP	Spike	S:V622A	T23427C
EPI_ISL_437857	25231	C	T	25218	29901	S	G1223G	SNP_silent	Spike	S:G1223G	C25231T
EPI_ISL_437857	28144	T	C	28131	29901	ORF8	L84S	SNP	ORF8 protein	ORF8:L84S	T28144C
EPI_ISL_461418	31	A	T	18	29859	5'UTR	31	extragenic		5'UTR:31	A31T
EPI_ISL_461418	36	C	T	23	29859	5'UTR	36	extragenic		5'UTR:36	C36T
EPI_ISL_461418	6693	A	G	6680	29859	NSP3	K1325R	SNP	Predicted phosphoesterase, papain-like proteinase	NSP3:K1325R	A6693G
EPI_ISL_461418	8782	C	T	8769	29859	NSP4	S76S	SNP_silent	Transmembrane protein	NSP4:S76S	C8782T
EPI_ISL_461418	14877	C	T	14864	29859	NSP12b	Y470Y	SNP_silent	RNA-dependent RNA polymerase, post-ribosomal frameshift	NSP12b:Y470Y	C14877T
EPI_ISL_461418	17747	C	T	17734	29859	NSP13	P504L	SNP	Helicase	NSP13:P504L	C17747T
EPI_ISL_461418	17858	A	G	17845	29859	NSP13	Y541C	SNP	Helicase	NSP13:Y541C	A17858G
EPI_ISL_461418	18060	C	T	18047	29859	NSP14	L7L	SNP_silent	3'-to-5' exonuclease	NSP14:L7L	C18060T
EPI_ISL_461418	25433	C	T	25420	29859	ORF3a	T14I	SNP	ORF3a protein	ORF3a:T14I	C25433T
EPI_ISL_461418	28144	T	C	28131	29859	ORF8	L84S	SNP	ORF8 protein	ORF8:L84S	T28144C
EPI_ISL_461418	28519	C	T	28506	29859	N	D82D	SNP_silent	Nucleocapsid protein	N:D82D	C28519T
EPI_ISL_461418	29188	A	T	29175	29859	N	A305A	SNP_silent	Nucleocapsid protein	N:A305A	A29188T
EPI_ISL_457738	32	C	T	20	29858	5'UTR	32	extragenic		5'UTR:32	C32T
EPI_ISL_457738	241	C	T	229	29858	5'UTR	241	extragenic		5'UTR:241	C241T
EPI_ISL_457738	3037	C	T	3025	29858	NSP3	F106F	SNP_silent	Predicted phosphoesterase, papain-like proteinase	NSP3:F106F	C3037T
EPI_ISL_457738	4234	C	T	4222	29858	NSP3	D505D	SNP_silent	Predicted phosphoesterase, papain-like proteinase	NSP3:D505D	C4234T
EPI_ISL_457738	14408	C	T	14396	29858	NSP12b	P314L	SNP	RNA-dependent RNA polymerase, post-ribosomal frameshift	NSP12b:P314L	C14408T
EPI_ISL_457738	19839	T	C	19827	29858	NSP15	N73N	SNP_silent	endoRNAse	NSP15:N73N	T19839C
EPI_ISL_457738	23403	A	G	23391	29858	S	D614G	SNP	Spike	S:D614G	A23403G
EPI_ISL_457738	25437	G	T	25425	29858	ORF3a	L15F	SNP	ORF3a protein	ORF3a:L15F	G25437T
EPI_ISL_457738	28881	GGG	AAC	28869	29858	N	RG203KR	SNP	Nucleocapsid protein	N:RG203KR	GGG28881AAC
EPI_ISL_455700	33	C	G	33	29903	5'UTR	33	extragenic		5'UTR:33	C33G
EPI_ISL_455700	37	C	A	37	29903	5'UTR	37	extragenic		5'UTR:37	C37A
EPI_ISL_455700	241	C	T	241	29903	5'UTR	241	extragenic		5'UTR:241	C241T
EPI_ISL_455700	3037	C	T	3037	29903	NSP3	F106F	SNP_silent	Predicted phosphoesterase, papain-like proteinase	NSP3:F106F	C3037T
EPI_ISL_455700	14408	C	T	14408	29903	NSP12b	P314L	SNP	RNA-dependent RNA polymerase, post-ribosomal frameshift	NSP12b:P314L	C14408T
EPI_ISL_455700	23403	A	G	23403	29903	S	D614G	SNP	Spike	S:D614G	A23403G
EPI_ISL_455700	26530	A	G	26530	29903	M	D3G	SNP	Membrane	M:D3G	A26530G
EPI_ISL_417359	34	AACC	TTTA	31	29899	5'UTR	34	extragenic		5'UTR:34	AACC34TTTA
EPI_ISL_417359	241	C	T	238	29899	5'UTR	241	extragenic		5'UTR:241	C241T
EPI_ISL_417359	1059	C	T	1056	29899	NSP2	T85I	SNP	Non-Structural protein 2	NSP2:T85I	C1059T
EPI_ISL_417359	3037	C	T	3034	29899	NSP3	F106F	SNP_silent	Predicted phosphoesterase, papain-like proteinase	NSP3:F106F	C3037T
EPI_ISL_417359	9511	T	C	9508	29899	NSP4	T319T	SNP_silent	Transmembrane protein	NSP4:T319T	T9511C
EPI_ISL_417359	14408	C	T	14405	29899	NSP12b	P314L	SNP	RNA-dependent RNA polymerase, post-ribosomal frameshift	NSP12b:P314L	C14408T
EPI_ISL_417359	23403	A	G	23400	29899	S	D614G	SNP	Spike	S:D614G	A23403G
EPI_ISL_417359	25563	G	T	25560	29899	ORF3a	Q57H	SNP	ORF3a protein	ORF3a:Q57H	G25563T
EPI_ISL_417454	34	AACC	TTTA	33	29900	5'UTR	34	extragenic		5'UTR:34	AACC34TTTA
EPI_ISL_417454	241	C	T	240	29900	5'UTR	241	extragenic		5'UTR:241	C241T
EPI_ISL_417454	1059	C	T	1058	29900	NSP2	T85I	SNP	Non-Structural protein 2	NSP2:T85I	C1059T
EPI_ISL_417454	3037	C	T	3036	29900	NSP3	F106F	SNP_silent	Predicted phosphoesterase, papain-like proteinase	NSP3:F106F	C3037T
EPI_ISL_417454	14408	C	T	14407	29900	NSP12b	P314L	SNP	RNA-dependent RNA polymerase, post-ribosomal frameshift	NSP12b:P314L	C14408T
EPI_ISL_417454	16912	G	T	16911	29900	NSP13	V226L	SNP	Helicase	NSP13:V226L	G16912T
EPI_ISL_417454	23403	A	G	23402	29900	S	D614G	SNP	Spike	S:D614G	A23403G
EPI_ISL_417454	25563	G	T	25562	29900	ORF3a	Q57H	SNP	ORF3a protein	ORF3a:Q57H	G25563T
EPI_ISL_417454	29553	G	A	29552	29900	3'UTR	29553	extragenic		3'UTR:29553	G29553A
EPI_ISL_418062	34	AAC	TTT	28	29894	5'UTR	34	extragenic		5'UTR:34	AAC34TTT
EPI_ISL_418062	6424	A	C	6418	29894	NSP3	E1235D	SNP	Predicted phosphoesterase, papain-like proteinase	NSP3:E1235D	A6424C
EPI_ISL_418062	8782	C	T	8776	29894	NSP4	S76S	SNP_silent	Transmembrane protein	NSP4:S76S	C8782T
EPI_ISL_418062	11042	G	T	11036	29894	NSP6	V24F	SNP	Transmembrane protein	NSP6:V24F	G11042T
EPI_ISL_418062	17747	C	T	17741	29894	NSP13	P504L	SNP	Helicase	NSP13:P504L	C17747T
EPI_ISL_418062	17858	A	G	17852	29894	NSP13	Y541C	SNP	Helicase	NSP13:Y541C	A17858G
EPI_ISL_418062	18060	C	T	18054	29894	NSP14	L7L	SNP_silent	3'-to-5' exonuclease	NSP14:L7L	C18060T
EPI_ISL_418062	22207	T	C	22201	29894	S	D215D	SNP_silent	Spike	S:D215D	T22207C
EPI_ISL_418062	24694	A	T	24688	29894	S	G1044G	SNP_silent	Spike	S:G1044G	A24694T
EPI_ISL_418062	28144	T	C	28138	29894	ORF8	L84S	SNP	ORF8 protein	ORF8:L84S	T28144C
EPI_ISL_418062	28283	A	G	28277	29894	N	N4D	SNP	Nucleocapsid protein	N:N4D	A28283G
EPI_ISL_418064	34	AACC	CTTT	22	29864	5'UTR	34	extragenic		5'UTR:34	AACC34CTTT
EPI_ISL_418064	8782	C	T	8770	29864	NSP4	S76S	SNP_silent	Transmembrane protein	NSP4:S76S	C8782T
EPI_ISL_418064	15888	T	C	15876	29864	NSP12b	H807H	SNP_silent	RNA-dependent RNA polymerase, post-ribosomal frameshift	NSP12b:H807H	T15888C
EPI_ISL_418064	17747	C	T	17735	29864	NSP13	P504L	SNP	Helicase	NSP13:P504L	C17747T
EPI_ISL_418064	17858	A	G	17846	29864	NSP13	Y541C	SNP	Helicase	NSP13:Y541C	A17858G
EPI_ISL_418064	18060	C	T	18048	29864	NSP14	L7L	SNP_silent	3'-to-5' exonuclease	NSP14:L7L	C18060T
EPI_ISL_418064	28144	T	C	28132	29864	ORF8	L84S	SNP	ORF8 protein	ORF8:L84S	T28144C
EPI_ISL_418067	34	AACC	TTTA	17	29892	5'UTR	34	extragenic		5'UTR:34	AACC34TTTA
EPI_ISL_418067	241	C	T	224	29892	5'UTR	241	extragenic		5'UTR:241	C241T
EPI_ISL_418067	1059	C	T	1042	29892	NSP2	T85I	SNP	Non-Structural protein 2	NSP2:T85I	C1059T
EPI_ISL_418067	3037	C	T	3020	29892	NSP3	F106F	SNP_silent	Predicted phosphoesterase, papain-like proteinase	NSP3:F106F	C3037T
EPI_ISL_418067	14408	C	T	14391	29892	NSP12b	P314L	SNP	RNA-dependent RNA polymerase, post-ribosomal frameshift	NSP12b:P314L	C14408T
EPI_ISL_418067	23403	A	G	23386	29892	S	D614G	SNP	Spike	S:D614G	A23403G
EPI_ISL_418067	25563	G	T	25546	29892	ORF3a	Q57H	SNP	ORF3a protein	ORF3a:Q57H	G25563T
EPI_ISL_418067	29553	G	A	29536	29892	3'UTR	29553	extragenic		3'UTR:29553	G29553A
EPI_ISL_418867	34	AACC	TTTA	21	29900	5'UTR	34	extragenic		5'UTR:34	AACC34TTTA
EPI_ISL_418867	8782	C	T	8769	29900	NSP4	S76S	SNP_silent	Transmembrane protein	NSP4:S76S	C8782T
EPI_ISL_418867	17747	C	T	17734	29900	NSP13	P504L	SNP	Helicase	NSP13:P504L	C17747T
EPI_ISL_418867	17858	A	G	17845	29900	NSP13	Y541C	SNP	Helicase	NSP13:Y541C	A17858G
EPI_ISL_418867	18060	C	T	18047	29900	NSP14	L7L	SNP_silent	3'-to-5' exonuclease	NSP14:L7L	C18060T
EPI_ISL_418867	28144	T	C	28131	29900	ORF8	L84S	SNP	ORF8 protein	ORF8:L84S	T28144C
EPI_ISL_418867	29866	A	T	29853	29900	3'UTR	29866	extragenic		3'UTR:29866	A29866T
EPI_ISL_418867	29869	A	T	29856	29900	3'UTR	29869	extragenic		3'UTR:29869	A29869T
EPI_ISL_418922	34	AACC	TTTA	16	29882	5'UTR	34	extragenic		5'UTR:34	AACC34TTTA
EPI_ISL_418922	6693	A	G	6675	29882	NSP3	K1325R	SNP	Predicted phosphoesterase, papain-like proteinase	NSP3:K1325R	A6693G
EPI_ISL_418922	8782	C	T	8764	29882	NSP4	S76S	SNP_silent	Transmembrane protein	NSP4:S76S	C8782T
EPI_ISL_418922	14877	C	T	14859	29882	NSP12b	Y470Y	SNP_silent	RNA-dependent RNA polymerase, post-ribosomal frameshift	NSP12b:Y470Y	C14877T
EPI_ISL_418922	17747	C	T	17729	29882	NSP13	P504L	SNP	Helicase	NSP13:P504L	C17747T
EPI_ISL_418922	17858	A	G	17840	29882	NSP13	Y541C	SNP	Helicase	NSP13:Y541C	A17858G
EPI_ISL_418922	18060	C	T	18042	29882	NSP14	L7L	SNP_silent	3'-to-5' exonuclease	NSP14:L7L	C18060T
EPI_ISL_418922	28144	T	C	28126	29882	ORF8	L84S	SNP	ORF8 protein	ORF8:L84S	T28144C
EPI_ISL_418922	29188	A	T	29170	29882	N	A305A	SNP_silent	Nucleocapsid protein	N:A305A	A29188T
EPI_ISL_418945	34	AAC	TTT	21	29881	5'UTR	34	extragenic		5'UTR:34	AAC34TTT
EPI_ISL_418945	6693	A	G	6680	29881	NSP3	K1325R	SNP	Predicted phosphoesterase, papain-like proteinase	NSP3:K1325R	A6693G
EPI_ISL_418945	8782	C	T	8769	29881	NSP4	S76S	SNP_silent	Transmembrane protein	NSP4:S76S	C8782T
EPI_ISL_418945	14877	C	T	14864	29881	NSP12b	Y470Y	SNP_silent	RNA-dependent RNA polymerase, post-ribosomal frameshift	NSP12b:Y470Y	C14877T
EPI_ISL_418945	17747	C	T	17734	29881	NSP13	P504L	SNP	Helicase	NSP13:P504L	C17747T
EPI_ISL_418945	17858	A	G	17845	29881	NSP13	Y541C	SNP	Helicase	NSP13:Y541C	A17858G
EPI_ISL_418945	18060	C	T	18047	29881	NSP14	L7L	SNP_silent	3'-to-5' exonuclease	NSP14:L7L	C18060T
EPI_ISL_418945	28144	T	C	28131	29881	ORF8	L84S	SNP	ORF8 protein	ORF8:L84S	T28144C
EPI_ISL_418945	29188	A	T	29175	29881	N	A305A	SNP_silent	Nucleocapsid protein	N:A305A	A29188T
EPI_ISL_422964	34	AACC	TTTA	23	29890	5'UTR	34	extragenic		5'UTR:34	AACC34TTTA
EPI_ISL_422964	8782	C	T	8771	29890	NSP4	S76S	SNP_silent	Transmembrane protein	NSP4:S76S	C8782T
EPI_ISL_422964	12787	A	G	12776	29890	NSP9	T34T	SNP_silent	ssRNA-binding protein	NSP9:T34T	A12787G
EPI_ISL_422964	17747	C	T	17736	29890	NSP13	P504L	SNP	Helicase	NSP13:P504L	C17747T
EPI_ISL_422964	17858	A	G	17847	29890	NSP13	Y541C	SNP	Helicase	NSP13:Y541C	A17858G
EPI_ISL_422964	18060	C	T	18049	29890	NSP14	L7L	SNP_silent	3'-to-5' exonuclease	NSP14:L7L	C18060T
EPI_ISL_422964	24694	A	T	24683	29890	S	G1044G	SNP_silent	Spike	S:G1044G	A24694T
EPI_ISL_422964	28144	T	C	28133	29890	ORF8	L84S	SNP	ORF8 protein	ORF8:L84S	T28144C
EPI_ISL_422964	28899	G	C	28888	29890	N	R209T	SNP	Nucleocapsid protein	N:R209T	G28899C
EPI_ISL_423003	34	AACC	TTTA	26	29881	5'UTR	34	extragenic		5'UTR:34	AACC34TTTA
EPI_ISL_423003	8782	C	T	8774	29881	NSP4	S76S	SNP_silent	Transmembrane protein	NSP4:S76S	C8782T
EPI_ISL_423003	17747	C	T	17739	29881	NSP13	P504L	SNP	Helicase	NSP13:P504L	C17747T
EPI_ISL_423003	17858	A	G	17850	29881	NSP13	Y541C	SNP	Helicase	NSP13:Y541C	A17858G
EPI_ISL_423003	18060	C	T	18052	29881	NSP14	L7L	SNP_silent	3'-to-5' exonuclease	NSP14:L7L	C18060T
EPI_ISL_423003	28144	T	C	28136	29881	ORF8	L84S	SNP	ORF8 protein	ORF8:L84S	T28144C
EPI_ISL_423005	34	AACC	TTTA	11	29852	5'UTR	34	extragenic		5'UTR:34	AACC34TTTA
EPI_ISL_423005	8602	G	A	8579	29852	NSP4	V16V	SNP_silent	Transmembrane protein	NSP4:V16V	G8602A
EPI_ISL_423005	8782	C	T	8759	29852	NSP4	S76S	SNP_silent	Transmembrane protein	NSP4:S76S	C8782T
EPI_ISL_423005	17747	C	T	17724	29852	NSP13	P504L	SNP	Helicase	NSP13:P504L	C17747T
EPI_ISL_423005	17858	A	G	17835	29852	NSP13	Y541C	SNP	Helicase	NSP13:Y541C	A17858G
EPI_ISL_423005	18060	C	T	18037	29852	NSP14	L7L	SNP_silent	3'-to-5' exonuclease	NSP14:L7L	C18060T
EPI_ISL_423005	26152	G	A	26129	29852	ORF3a	G254R	SNP	ORF3a protein	ORF3a:G254R	G26152A
EPI_ISL_423005	28144	T	C	28121	29852	ORF8	L84S	SNP	ORF8 protein	ORF8:L84S	T28144C
EPI_ISL_423010	34	AACC	TTTA	27	29896	5'UTR	34	extragenic		5'UTR:34	AACC34TTTA
EPI_ISL_423010	241	C	T	234	29896	5'UTR	241	extragenic		5'UTR:241	C241T
EPI_ISL_423010	1059	C	T	1052	29896	NSP2	T85I	SNP	Non-Structural protein 2	NSP2:T85I	C1059T
EPI_ISL_423010	3037	C	T	3030	29896	NSP3	F106F	SNP_silent	Predicted phosphoesterase, papain-like proteinase	NSP3:F106F	C3037T
EPI_ISL_423010	14408	C	T	14401	29896	NSP12b	P314L	SNP	RNA-dependent RNA polymerase, post-ribosomal frameshift	NSP12b:P314L	C14408T
EPI_ISL_423010	23403	A	G	23396	29896	S	D614G	SNP	Spike	S:D614G	A23403G
EPI_ISL_423010	25563	G	T	25556	29896	ORF3a	Q57H	SNP	ORF3a protein	ORF3a:Q57H	G25563T
EPI_ISL_423010	29553	G	A	29546	29896	3'UTR	29553	extragenic		3'UTR:29553	G29553A
EPI_ISL_424207	34	AAC	TTT	21	29888	5'UTR	34	extragenic		5'UTR:34	AAC34TTT
EPI_ISL_424207	241	C	T	228	29888	5'UTR	241	extragenic		5'UTR:241	C241T
EPI_ISL_424207	1059	C	T	1046	29888	NSP2	T85I	SNP	Non-Structural protein 2	NSP2:T85I	C1059T
EPI_ISL_424207	3037	C	T	3024	29888	NSP3	F106F	SNP_silent	Predicted phosphoesterase, papain-like proteinase	NSP3:F106F	C3037T
EPI_ISL_424207	7561	G	A	7548	29888	NSP3	R1614R	SNP_silent	Predicted phosphoesterase, papain-like proteinase	NSP3:R1614R	G7561A
EPI_ISL_424207	14408	C	T	14395	29888	NSP12b	P314L	SNP	RNA-dependent RNA polymerase, post-ribosomal frameshift	NSP12b:P314L	C14408T
EPI_ISL_424207	23403	A	G	23390	29888	S	D614G	SNP	Spike	S:D614G	A23403G
EPI_ISL_424207	25563	G	T	25550	29888	ORF3a	Q57H	SNP	ORF3a protein	ORF3a:Q57H	G25563T
EPI_ISL_424207	28881	G	A	28868	29888	N	R203K	SNP	Nucleocapsid protein	N:R203K	G28881A
EPI_ISL_424207	29866	A	G	29853	29888	3'UTR	29866	extragenic		3'UTR:29866	A29866G
EPI_ISL_424207	29869	A	T	29856	29888	3'UTR	29869	extragenic		3'UTR:29869	A29869T
[truncated: 351,342 more rows]
