# Supplementary material for: Rational Primer and Probe Construction in PCR-Based Assays for the Efficient Diagnosis of Drifting Variants of SARS-CoV-2
Source: Adv Virol. 2022 May 13;2022:2965666. doi: 10.1155/2022/2965666 (PMC9122727; doi:10.1155/2022/2965666)
Supplement: Supplementary Materials — Supplementary 1: Multiple sequence alignment (MUSCLE) data/diagram of the entire N gene among analyzed 8 coronavirus sequences (NCBI GenBank IDs) by MEGA11 version 0.1 and is presented. Supplementary 2:: Original raw file downloaded from [15]. It contains all the records of mutations in SARS-CoV-2 genomes studied. Supplementary 3, 4, 5, 6, and 7: spreadsheet files for mutation analyses for NSP12ab, S, E, M, and N genes of SARS-CoV-2 genome, respectively, and are available on request. [file 2965666.f1.zip › 2965666.f1/Supplementery 3 (1).txt]

sample	refpos	refvar	qvar	qpos	qlength	protein	variant	varclass	annotation	varname	varclade
EPI_ISL_449979	13443	C	T	13443	29903	NSP12a	S1L	SNP	RNA-dependent RNA polymerase, pre-ribosomal frameshift	NSP12a:S1L	C13443T
EPI_ISL_427291	13444	AGCTGATGCACAATCGTTTTTAAACGGG	.	13284	29279	NSP12a	S1	deletion_frameshift	RNA-dependent RNA polymerase, pre-ribosomal frameshift	NSP12a:S1	AGCTGATGCACAATCGTTTTTAAACGGG13444.
EPI_ISL_433074	13445	G	T	13445	29903	NSP12a	A2S	SNP	RNA-dependent RNA polymerase, pre-ribosomal frameshift	NSP12a:A2S	G13445T
EPI_ISL_422321	13445	G	A	13434	29892	NSP12a	A2T	SNP	RNA-dependent RNA polymerase, pre-ribosomal frameshift	NSP12a:A2T	G13445A
EPI_ISL_435059	13446	C	A	13445	29902	NSP12a	A2D	SNP	RNA-dependent RNA polymerase, pre-ribosomal frameshift	NSP12a:A2D	C13446A
EPI_ISL_458590	13446	C	T	13392	29782	NSP12a	A2V	SNP	RNA-dependent RNA polymerase, pre-ribosomal frameshift	NSP12a:A2V	C13446T
EPI_ISL_458698	13446	C	T	13392	29783	NSP12a	A2V	SNP	RNA-dependent RNA polymerase, pre-ribosomal frameshift	NSP12a:A2V	C13446T
EPI_ISL_463074	13449	A	G	13449	29689	NSP12a	D3G	SNP	RNA-dependent RNA polymerase, pre-ribosomal frameshift	NSP12a:D3G	A13449G
EPI_ISL_419571	13450	T	A	13450	29857	NSP12a	D3E	SNP	RNA-dependent RNA polymerase, pre-ribosomal frameshift	NSP12a:D3E	T13450A
EPI_ISL_445985	13451	G	A	13434	29886	NSP12a	A4T	SNP	RNA-dependent RNA polymerase, pre-ribosomal frameshift	NSP12a:A4T	G13451A
EPI_ISL_458939	13452	C	T	13398	29782	NSP12a	A4V	SNP	RNA-dependent RNA polymerase, pre-ribosomal frameshift	NSP12a:A4V	C13452T
EPI_ISL_459049	13452	C	T	13398	29782	NSP12a	A4V	SNP	RNA-dependent RNA polymerase, pre-ribosomal frameshift	NSP12a:A4V	C13452T
EPI_ISL_473664	13454	CAATCGTTTTTAAACGGGTTTGCGGTGTAAGTGCAGCCCGT	.	13399	29741	NSP12a	A4	deletion_frameshift	RNA-dependent RNA polymerase, pre-ribosomal frameshift	NSP12a:A4	CAATCGTTTTTAAACGGGTTTGCGGTGTAAGTGCAGCCCGT13454.
EPI_ISL_454548	13454	C	T	13454	29903	NSP12a	Q5*	SNP_stop	RNA-dependent RNA polymerase, pre-ribosomal frameshift	NSP12a:Q5*	C13454T
EPI_ISL_457031	13456	A	G	13456	29903	NSP12a	Q5Q	SNP_silent	RNA-dependent RNA polymerase, pre-ribosomal frameshift	NSP12a:Q5Q	A13456G
EPI_ISL_457032	13456	A	G	13444	29891	NSP12a	Q5Q	SNP_silent	RNA-dependent RNA polymerase, pre-ribosomal frameshift	NSP12a:Q5Q	A13456G
EPI_ISL_457033	13456	A	G	13444	29891	NSP12a	Q5Q	SNP_silent	RNA-dependent RNA polymerase, pre-ribosomal frameshift	NSP12a:Q5Q	A13456G
EPI_ISL_457034	13456	A	G	13443	29890	NSP12a	Q5Q	SNP_silent	RNA-dependent RNA polymerase, pre-ribosomal frameshift	NSP12a:Q5Q	A13456G
EPI_ISL_457035	13456	A	G	13456	29903	NSP12a	Q5Q	SNP_silent	RNA-dependent RNA polymerase, pre-ribosomal frameshift	NSP12a:Q5Q	A13456G
EPI_ISL_457036	13456	A	G	13456	29903	NSP12a	Q5Q	SNP_silent	RNA-dependent RNA polymerase, pre-ribosomal frameshift	NSP12a:Q5Q	A13456G
EPI_ISL_457037	13456	A	G	13444	29891	NSP12a	Q5Q	SNP_silent	RNA-dependent RNA polymerase, pre-ribosomal frameshift	NSP12a:Q5Q	A13456G
EPI_ISL_457038	13456	A	G	13456	29903	NSP12a	Q5Q	SNP_silent	RNA-dependent RNA polymerase, pre-ribosomal frameshift	NSP12a:Q5Q	A13456G
EPI_ISL_457041	13456	A	G	13456	29903	NSP12a	Q5Q	SNP_silent	RNA-dependent RNA polymerase, pre-ribosomal frameshift	NSP12a:Q5Q	A13456G
EPI_ISL_457042	13456	A	G	13444	29891	NSP12a	Q5Q	SNP_silent	RNA-dependent RNA polymerase, pre-ribosomal frameshift	NSP12a:Q5Q	A13456G
EPI_ISL_457043	13456	A	G	13456	29903	NSP12a	Q5Q	SNP_silent	RNA-dependent RNA polymerase, pre-ribosomal frameshift	NSP12a:Q5Q	A13456G
EPI_ISL_457044	13456	A	G	13456	29903	NSP12a	Q5Q	SNP_silent	RNA-dependent RNA polymerase, pre-ribosomal frameshift	NSP12a:Q5Q	A13456G
EPI_ISL_457045	13456	A	G	13444	29891	NSP12a	Q5Q	SNP_silent	RNA-dependent RNA polymerase, pre-ribosomal frameshift	NSP12a:Q5Q	A13456G
EPI_ISL_457046	13456	A	G	13444	29891	NSP12a	Q5Q	SNP_silent	RNA-dependent RNA polymerase, pre-ribosomal frameshift	NSP12a:Q5Q	A13456G
EPI_ISL_457047	13456	A	G	13456	29903	NSP12a	Q5Q	SNP_silent	RNA-dependent RNA polymerase, pre-ribosomal frameshift	NSP12a:Q5Q	A13456G
EPI_ISL_457048	13456	A	G	13444	29891	NSP12a	Q5Q	SNP_silent	RNA-dependent RNA polymerase, pre-ribosomal frameshift	NSP12a:Q5Q	A13456G
EPI_ISL_457049	13456	A	G	13456	29903	NSP12a	Q5Q	SNP_silent	RNA-dependent RNA polymerase, pre-ribosomal frameshift	NSP12a:Q5Q	A13456G
EPI_ISL_457050	13456	A	G	13444	29891	NSP12a	Q5Q	SNP_silent	RNA-dependent RNA polymerase, pre-ribosomal frameshift	NSP12a:Q5Q	A13456G
EPI_ISL_457051	13456	A	G	13444	29891	NSP12a	Q5Q	SNP_silent	RNA-dependent RNA polymerase, pre-ribosomal frameshift	NSP12a:Q5Q	A13456G
EPI_ISL_457052	13456	A	G	13456	29903	NSP12a	Q5Q	SNP_silent	RNA-dependent RNA polymerase, pre-ribosomal frameshift	NSP12a:Q5Q	A13456G
EPI_ISL_457053	13456	A	G	13456	29903	NSP12a	Q5Q	SNP_silent	RNA-dependent RNA polymerase, pre-ribosomal frameshift	NSP12a:Q5Q	A13456G
EPI_ISL_457054	13456	A	G	13456	29903	NSP12a	Q5Q	SNP_silent	RNA-dependent RNA polymerase, pre-ribosomal frameshift	NSP12a:Q5Q	A13456G
EPI_ISL_457061	13456	A	G	13456	29903	NSP12a	Q5Q	SNP_silent	RNA-dependent RNA polymerase, pre-ribosomal frameshift	NSP12a:Q5Q	A13456G
EPI_ISL_457065	13456	A	G	13456	29903	NSP12a	Q5Q	SNP_silent	RNA-dependent RNA polymerase, pre-ribosomal frameshift	NSP12a:Q5Q	A13456G
EPI_ISL_457068	13456	A	G	13456	29903	NSP12a	Q5Q	SNP_silent	RNA-dependent RNA polymerase, pre-ribosomal frameshift	NSP12a:Q5Q	A13456G
EPI_ISL_457069	13456	A	G	13456	29903	NSP12a	Q5Q	SNP_silent	RNA-dependent RNA polymerase, pre-ribosomal frameshift	NSP12a:Q5Q	A13456G
EPI_ISL_457085	13456	A	G	13444	29891	NSP12a	Q5Q	SNP_silent	RNA-dependent RNA polymerase, pre-ribosomal frameshift	NSP12a:Q5Q	A13456G
EPI_ISL_457092	13456	A	G	13456	29903	NSP12a	Q5Q	SNP_silent	RNA-dependent RNA polymerase, pre-ribosomal frameshift	NSP12a:Q5Q	A13456G
EPI_ISL_457097	13456	A	G	13444	29891	NSP12a	Q5Q	SNP_silent	RNA-dependent RNA polymerase, pre-ribosomal frameshift	NSP12a:Q5Q	A13456G
EPI_ISL_457102	13456	A	G	13444	29891	NSP12a	Q5Q	SNP_silent	RNA-dependent RNA polymerase, pre-ribosomal frameshift	NSP12a:Q5Q	A13456G
EPI_ISL_457105	13456	A	G	13456	29903	NSP12a	Q5Q	SNP_silent	RNA-dependent RNA polymerase, pre-ribosomal frameshift	NSP12a:Q5Q	A13456G
EPI_ISL_457131	13456	A	G	13456	29903	NSP12a	Q5Q	SNP_silent	RNA-dependent RNA polymerase, pre-ribosomal frameshift	NSP12a:Q5Q	A13456G
EPI_ISL_457133	13456	A	G	13456	29903	NSP12a	Q5Q	SNP_silent	RNA-dependent RNA polymerase, pre-ribosomal frameshift	NSP12a:Q5Q	A13456G
EPI_ISL_457138	13456	A	G	13444	29891	NSP12a	Q5Q	SNP_silent	RNA-dependent RNA polymerase, pre-ribosomal frameshift	NSP12a:Q5Q	A13456G
EPI_ISL_457142	13456	A	G	13456	29903	NSP12a	Q5Q	SNP_silent	RNA-dependent RNA polymerase, pre-ribosomal frameshift	NSP12a:Q5Q	A13456G
EPI_ISL_457145	13456	A	G	13456	29903	NSP12a	Q5Q	SNP_silent	RNA-dependent RNA polymerase, pre-ribosomal frameshift	NSP12a:Q5Q	A13456G
EPI_ISL_457159	13456	A	G	13456	29903	NSP12a	Q5Q	SNP_silent	RNA-dependent RNA polymerase, pre-ribosomal frameshift	NSP12a:Q5Q	A13456G
EPI_ISL_457186	13456	A	G	13444	29891	NSP12a	Q5Q	SNP_silent	RNA-dependent RNA polymerase, pre-ribosomal frameshift	NSP12a:Q5Q	A13456G
EPI_ISL_457187	13456	A	G	13444	29891	NSP12a	Q5Q	SNP_silent	RNA-dependent RNA polymerase, pre-ribosomal frameshift	NSP12a:Q5Q	A13456G
EPI_ISL_457188	13456	A	G	13444	29891	NSP12a	Q5Q	SNP_silent	RNA-dependent RNA polymerase, pre-ribosomal frameshift	NSP12a:Q5Q	A13456G
EPI_ISL_457189	13456	A	G	13456	29903	NSP12a	Q5Q	SNP_silent	RNA-dependent RNA polymerase, pre-ribosomal frameshift	NSP12a:Q5Q	A13456G
EPI_ISL_457193	13456	A	G	13444	29891	NSP12a	Q5Q	SNP_silent	RNA-dependent RNA polymerase, pre-ribosomal frameshift	NSP12a:Q5Q	A13456G
EPI_ISL_457194	13456	A	G	13456	29903	NSP12a	Q5Q	SNP_silent	RNA-dependent RNA polymerase, pre-ribosomal frameshift	NSP12a:Q5Q	A13456G
EPI_ISL_457195	13456	A	G	13456	29903	NSP12a	Q5Q	SNP_silent	RNA-dependent RNA polymerase, pre-ribosomal frameshift	NSP12a:Q5Q	A13456G
EPI_ISL_457197	13456	A	G	13444	29891	NSP12a	Q5Q	SNP_silent	RNA-dependent RNA polymerase, pre-ribosomal frameshift	NSP12a:Q5Q	A13456G
EPI_ISL_457203	13456	A	G	13444	29891	NSP12a	Q5Q	SNP_silent	RNA-dependent RNA polymerase, pre-ribosomal frameshift	NSP12a:Q5Q	A13456G
EPI_ISL_457204	13456	A	G	13456	29903	NSP12a	Q5Q	SNP_silent	RNA-dependent RNA polymerase, pre-ribosomal frameshift	NSP12a:Q5Q	A13456G
EPI_ISL_457212	13456	A	G	13456	29903	NSP12a	Q5Q	SNP_silent	RNA-dependent RNA polymerase, pre-ribosomal frameshift	NSP12a:Q5Q	A13456G
EPI_ISL_457213	13456	A	G	13456	29903	NSP12a	Q5Q	SNP_silent	RNA-dependent RNA polymerase, pre-ribosomal frameshift	NSP12a:Q5Q	A13456G
EPI_ISL_457215	13456	A	G	13444	29891	NSP12a	Q5Q	SNP_silent	RNA-dependent RNA polymerase, pre-ribosomal frameshift	NSP12a:Q5Q	A13456G
EPI_ISL_457219	13456	A	G	13444	29891	NSP12a	Q5Q	SNP_silent	RNA-dependent RNA polymerase, pre-ribosomal frameshift	NSP12a:Q5Q	A13456G
EPI_ISL_457225	13456	A	G	13456	29903	NSP12a	Q5Q	SNP_silent	RNA-dependent RNA polymerase, pre-ribosomal frameshift	NSP12a:Q5Q	A13456G
EPI_ISL_457235	13456	A	G	13444	29891	NSP12a	Q5Q	SNP_silent	RNA-dependent RNA polymerase, pre-ribosomal frameshift	NSP12a:Q5Q	A13456G
EPI_ISL_457257	13456	A	G	13444	29891	NSP12a	Q5Q	SNP_silent	RNA-dependent RNA polymerase, pre-ribosomal frameshift	NSP12a:Q5Q	A13456G
EPI_ISL_471962	13456	A	G	13456	29903	NSP12a	Q5Q	SNP_silent	RNA-dependent RNA polymerase, pre-ribosomal frameshift	NSP12a:Q5Q	A13456G
EPI_ISL_417700	13458	C	T	13458	29903	NSP12a	S6L	SNP	RNA-dependent RNA polymerase, pre-ribosomal frameshift	NSP12a:S6L	C13458T
EPI_ISL_425538	13458	C	T	13458	29903	NSP12a	S6L	SNP	RNA-dependent RNA polymerase, pre-ribosomal frameshift	NSP12a:S6L	C13458T
EPI_ISL_429729	13458	C	T	13458	29872	NSP12a	S6L	SNP	RNA-dependent RNA polymerase, pre-ribosomal frameshift	NSP12a:S6L	C13458T
EPI_ISL_429740	13458	C	T	13458	29860	NSP12a	S6L	SNP	RNA-dependent RNA polymerase, pre-ribosomal frameshift	NSP12a:S6L	C13458T
EPI_ISL_442672	13458	C	T	13404	29782	NSP12a	S6L	SNP	RNA-dependent RNA polymerase, pre-ribosomal frameshift	NSP12a:S6L	C13458T
EPI_ISL_445424	13458	C	T	13454	29899	NSP12a	S6L	SNP	RNA-dependent RNA polymerase, pre-ribosomal frameshift	NSP12a:S6L	C13458T
EPI_ISL_449505	13458	C	T	13448	29893	NSP12a	S6L	SNP	RNA-dependent RNA polymerase, pre-ribosomal frameshift	NSP12a:S6L	C13458T
EPI_ISL_452049	13458	C	T	13458	29903	NSP12a	S6L	SNP	RNA-dependent RNA polymerase, pre-ribosomal frameshift	NSP12a:S6L	C13458T
EPI_ISL_453241	13458	C	T	13433	29878	NSP12a	S6L	SNP	RNA-dependent RNA polymerase, pre-ribosomal frameshift	NSP12a:S6L	C13458T
EPI_ISL_453311	13458	C	T	13428	29836	NSP12a	S6L	SNP	RNA-dependent RNA polymerase, pre-ribosomal frameshift	NSP12a:S6L	C13458T
EPI_ISL_453668	13458	C	T	13458	29903	NSP12a	S6L	SNP	RNA-dependent RNA polymerase, pre-ribosomal frameshift	NSP12a:S6L	C13458T
EPI_ISL_458237	13458	C	T	13458	29903	NSP12a	S6L	SNP	RNA-dependent RNA polymerase, pre-ribosomal frameshift	NSP12a:S6L	C13458T
EPI_ISL_459061	13458	C	T	13404	29782	NSP12a	S6L	SNP	RNA-dependent RNA polymerase, pre-ribosomal frameshift	NSP12a:S6L	C13458T
EPI_ISL_460861	13458	C	T	13404	29775	NSP12a	S6L	SNP	RNA-dependent RNA polymerase, pre-ribosomal frameshift	NSP12a:S6L	C13458T
EPI_ISL_460862	13458	C	T	13404	29775	NSP12a	S6L	SNP	RNA-dependent RNA polymerase, pre-ribosomal frameshift	NSP12a:S6L	C13458T
EPI_ISL_460863	13458	C	T	13404	29775	NSP12a	S6L	SNP	RNA-dependent RNA polymerase, pre-ribosomal frameshift	NSP12a:S6L	C13458T
EPI_ISL_460864	13458	C	T	13404	29775	NSP12a	S6L	SNP	RNA-dependent RNA polymerase, pre-ribosomal frameshift	NSP12a:S6L	C13458T
EPI_ISL_460865	13458	C	T	13404	29775	NSP12a	S6L	SNP	RNA-dependent RNA polymerase, pre-ribosomal frameshift	NSP12a:S6L	C13458T
EPI_ISL_460867	13458	C	T	13404	29775	NSP12a	S6L	SNP	RNA-dependent RNA polymerase, pre-ribosomal frameshift	NSP12a:S6L	C13458T
EPI_ISL_460868	13458	C	T	13404	29775	NSP12a	S6L	SNP	RNA-dependent RNA polymerase, pre-ribosomal frameshift	NSP12a:S6L	C13458T
EPI_ISL_460869	13458	C	T	13404	29775	NSP12a	S6L	SNP	RNA-dependent RNA polymerase, pre-ribosomal frameshift	NSP12a:S6L	C13458T
EPI_ISL_460870	13458	C	T	13404	29775	NSP12a	S6L	SNP	RNA-dependent RNA polymerase, pre-ribosomal frameshift	NSP12a:S6L	C13458T
EPI_ISL_460871	13458	C	T	13404	29775	NSP12a	S6L	SNP	RNA-dependent RNA polymerase, pre-ribosomal frameshift	NSP12a:S6L	C13458T
EPI_ISL_460872	13458	C	T	13404	29775	NSP12a	S6L	SNP	RNA-dependent RNA polymerase, pre-ribosomal frameshift	NSP12a:S6L	C13458T
EPI_ISL_460873	13458	C	T	13404	29775	NSP12a	S6L	SNP	RNA-dependent RNA polymerase, pre-ribosomal frameshift	NSP12a:S6L	C13458T
EPI_ISL_460874	13458	C	T	13404	29775	NSP12a	S6L	SNP	RNA-dependent RNA polymerase, pre-ribosomal frameshift	NSP12a:S6L	C13458T
EPI_ISL_460875	13458	C	T	13404	29775	NSP12a	S6L	SNP	RNA-dependent RNA polymerase, pre-ribosomal frameshift	NSP12a:S6L	C13458T
EPI_ISL_460876	13458	C	T	13404	29775	NSP12a	S6L	SNP	RNA-dependent RNA polymerase, pre-ribosomal frameshift	NSP12a:S6L	C13458T
EPI_ISL_460877	13458	C	T	13404	29775	NSP12a	S6L	SNP	RNA-dependent RNA polymerase, pre-ribosomal frameshift	NSP12a:S6L	C13458T
EPI_ISL_460878	13458	C	T	13404	29775	NSP12a	S6L	SNP	RNA-dependent RNA polymerase, pre-ribosomal frameshift	NSP12a:S6L	C13458T
EPI_ISL_460879	13458	C	T	13404	29775	NSP12a	S6L	SNP	RNA-dependent RNA polymerase, pre-ribosomal frameshift	NSP12a:S6L	C13458T
EPI_ISL_460881	13458	C	T	13404	29775	NSP12a	S6L	SNP	RNA-dependent RNA polymerase, pre-ribosomal frameshift	NSP12a:S6L	C13458T
EPI_ISL_460882	13458	C	T	13404	29775	NSP12a	S6L	SNP	RNA-dependent RNA polymerase, pre-ribosomal frameshift	NSP12a:S6L	C13458T
EPI_ISL_460883	13458	C	T	13404	29775	NSP12a	S6L	SNP	RNA-dependent RNA polymerase, pre-ribosomal frameshift	NSP12a:S6L	C13458T
EPI_ISL_460884	13458	C	T	13404	29775	NSP12a	S6L	SNP	RNA-dependent RNA polymerase, pre-ribosomal frameshift	NSP12a:S6L	C13458T
EPI_ISL_460885	13458	C	T	13404	29775	NSP12a	S6L	SNP	RNA-dependent RNA polymerase, pre-ribosomal frameshift	NSP12a:S6L	C13458T
EPI_ISL_460886	13458	C	T	13404	29775	NSP12a	S6L	SNP	RNA-dependent RNA polymerase, pre-ribosomal frameshift	NSP12a:S6L	C13458T
EPI_ISL_460887	13458	C	T	13404	29775	NSP12a	S6L	SNP	RNA-dependent RNA polymerase, pre-ribosomal frameshift	NSP12a:S6L	C13458T
EPI_ISL_460888	13458	C	T	13404	29775	NSP12a	S6L	SNP	RNA-dependent RNA polymerase, pre-ribosomal frameshift	NSP12a:S6L	C13458T
EPI_ISL_460889	13458	C	T	13404	29775	NSP12a	S6L	SNP	RNA-dependent RNA polymerase, pre-ribosomal frameshift	NSP12a:S6L	C13458T
EPI_ISL_460890	13458	C	T	13404	29775	NSP12a	S6L	SNP	RNA-dependent RNA polymerase, pre-ribosomal frameshift	NSP12a:S6L	C13458T
EPI_ISL_460894	13458	C	T	13404	29775	NSP12a	S6L	SNP	RNA-dependent RNA polymerase, pre-ribosomal frameshift	NSP12a:S6L	C13458T
EPI_ISL_460897	13458	C	T	13404	29775	NSP12a	S6L	SNP	RNA-dependent RNA polymerase, pre-ribosomal frameshift	NSP12a:S6L	C13458T
EPI_ISL_460899	13458	C	T	13404	29775	NSP12a	S6L	SNP	RNA-dependent RNA polymerase, pre-ribosomal frameshift	NSP12a:S6L	C13458T
EPI_ISL_460900	13458	C	T	13404	29775	NSP12a	S6L	SNP	RNA-dependent RNA polymerase, pre-ribosomal frameshift	NSP12a:S6L	C13458T
EPI_ISL_460901	13458	C	T	13404	29775	NSP12a	S6L	SNP	RNA-dependent RNA polymerase, pre-ribosomal frameshift	NSP12a:S6L	C13458T
EPI_ISL_460902	13458	C	T	13404	29775	NSP12a	S6L	SNP	RNA-dependent RNA polymerase, pre-ribosomal frameshift	NSP12a:S6L	C13458T
EPI_ISL_460903	13458	C	T	13404	29775	NSP12a	S6L	SNP	RNA-dependent RNA polymerase, pre-ribosomal frameshift	NSP12a:S6L	C13458T
EPI_ISL_460904	13458	C	T	13404	29775	NSP12a	S6L	SNP	RNA-dependent RNA polymerase, pre-ribosomal frameshift	NSP12a:S6L	C13458T
EPI_ISL_460905	13458	C	T	13404	29775	NSP12a	S6L	SNP	RNA-dependent RNA polymerase, pre-ribosomal frameshift	NSP12a:S6L	C13458T
EPI_ISL_460906	13458	C	T	13404	29775	NSP12a	S6L	SNP	RNA-dependent RNA polymerase, pre-ribosomal frameshift	NSP12a:S6L	C13458T
EPI_ISL_460907	13458	C	T	13404	29775	NSP12a	S6L	SNP	RNA-dependent RNA polymerase, pre-ribosomal frameshift	NSP12a:S6L	C13458T
EPI_ISL_460908	13458	C	T	13404	29775	NSP12a	S6L	SNP	RNA-dependent RNA polymerase, pre-ribosomal frameshift	NSP12a:S6L	C13458T
EPI_ISL_460909	13458	C	T	13404	29775	NSP12a	S6L	SNP	RNA-dependent RNA polymerase, pre-ribosomal frameshift	NSP12a:S6L	C13458T
EPI_ISL_460910	13458	C	T	13404	29775	NSP12a	S6L	SNP	RNA-dependent RNA polymerase, pre-ribosomal frameshift	NSP12a:S6L	C13458T
EPI_ISL_460911	13458	C	T	13404	29775	NSP12a	S6L	SNP	RNA-dependent RNA polymerase, pre-ribosomal frameshift	NSP12a:S6L	C13458T
EPI_ISL_460912	13458	C	T	13404	29775	NSP12a	S6L	SNP	RNA-dependent RNA polymerase, pre-ribosomal frameshift	NSP12a:S6L	C13458T
EPI_ISL_460913	13458	C	T	13404	29775	NSP12a	S6L	SNP	RNA-dependent RNA polymerase, pre-ribosomal frameshift	NSP12a:S6L	C13458T
EPI_ISL_460914	13458	C	T	13404	29775	NSP12a	S6L	SNP	RNA-dependent RNA polymerase, pre-ribosomal frameshift	NSP12a:S6L	C13458T
EPI_ISL_460917	13458	C	T	13404	29775	NSP12a	S6L	SNP	RNA-dependent RNA polymerase, pre-ribosomal frameshift	NSP12a:S6L	C13458T
EPI_ISL_460918	13458	C	T	13404	29775	NSP12a	S6L	SNP	RNA-dependent RNA polymerase, pre-ribosomal frameshift	NSP12a:S6L	C13458T
EPI_ISL_460919	13458	C	T	13404	29775	NSP12a	S6L	SNP	RNA-dependent RNA polymerase, pre-ribosomal frameshift	NSP12a:S6L	C13458T
EPI_ISL_460920	13458	C	T	13404	29775	NSP12a	S6L	SNP	RNA-dependent RNA polymerase, pre-ribosomal frameshift	NSP12a:S6L	C13458T
EPI_ISL_460921	13458	C	T	13404	29775	NSP12a	S6L	SNP	RNA-dependent RNA polymerase, pre-ribosomal frameshift	NSP12a:S6L	C13458T
EPI_ISL_460954	13458	C	T	13392	29763	NSP12a	S6L	SNP	RNA-dependent RNA polymerase, pre-ribosomal frameshift	NSP12a:S6L	C13458T
EPI_ISL_460955	13458	C	T	13404	29775	NSP12a	S6L	SNP	RNA-dependent RNA polymerase, pre-ribosomal frameshift	NSP12a:S6L	C13458T
EPI_ISL_460956	13458	C	T	13404	29775	NSP12a	S6L	SNP	RNA-dependent RNA polymerase, pre-ribosomal frameshift	NSP12a:S6L	C13458T
EPI_ISL_460957	13458	C	T	13404	29775	NSP12a	S6L	SNP	RNA-dependent RNA polymerase, pre-ribosomal frameshift	NSP12a:S6L	C13458T
EPI_ISL_460958	13458	C	T	13404	29775	NSP12a	S6L	SNP	RNA-dependent RNA polymerase, pre-ribosomal frameshift	NSP12a:S6L	C13458T
EPI_ISL_460960	13458	C	T	13404	29775	NSP12a	S6L	SNP	RNA-dependent RNA polymerase, pre-ribosomal frameshift	NSP12a:S6L	C13458T
EPI_ISL_460961	13458	C	T	13404	29775	NSP12a	S6L	SNP	RNA-dependent RNA polymerase, pre-ribosomal frameshift	NSP12a:S6L	C13458T
EPI_ISL_460962	13458	C	T	13404	29775	NSP12a	S6L	SNP	RNA-dependent RNA polymerase, pre-ribosomal frameshift	NSP12a:S6L	C13458T
EPI_ISL_460963	13458	C	T	13404	29775	NSP12a	S6L	SNP	RNA-dependent RNA polymerase, pre-ribosomal frameshift	NSP12a:S6L	C13458T
EPI_ISL_460964	13458	C	T	13404	29775	NSP12a	S6L	SNP	RNA-dependent RNA polymerase, pre-ribosomal frameshift	NSP12a:S6L	C13458T
EPI_ISL_460965	13458	C	T	13404	29775	NSP12a	S6L	SNP	RNA-dependent RNA polymerase, pre-ribosomal frameshift	NSP12a:S6L	C13458T
EPI_ISL_460967	13458	C	T	13404	29775	NSP12a	S6L	SNP	RNA-dependent RNA polymerase, pre-ribosomal frameshift	NSP12a:S6L	C13458T
EPI_ISL_460968	13458	C	T	13404	29775	NSP12a	S6L	SNP	RNA-dependent RNA polymerase, pre-ribosomal frameshift	NSP12a:S6L	C13458T
EPI_ISL_460969	13458	C	T	13404	29775	NSP12a	S6L	SNP	RNA-dependent RNA polymerase, pre-ribosomal frameshift	NSP12a:S6L	C13458T
EPI_ISL_460970	13458	C	T	13404	29775	NSP12a	S6L	SNP	RNA-dependent RNA polymerase, pre-ribosomal frameshift	NSP12a:S6L	C13458T
EPI_ISL_460971	13458	C	T	13404	29775	NSP12a	S6L	SNP	RNA-dependent RNA polymerase, pre-ribosomal frameshift	NSP12a:S6L	C13458T
EPI_ISL_460972	13458	C	T	13404	29775	NSP12a	S6L	SNP	RNA-dependent RNA polymerase, pre-ribosomal frameshift	NSP12a:S6L	C13458T
EPI_ISL_460973	13458	C	T	13404	29775	NSP12a	S6L	SNP	RNA-dependent RNA polymerase, pre-ribosomal frameshift	NSP12a:S6L	C13458T
EPI_ISL_460974	13458	C	T	13404	29775	NSP12a	S6L	SNP	RNA-dependent RNA polymerase, pre-ribosomal frameshift	NSP12a:S6L	C13458T
EPI_ISL_460975	13458	C	T	13404	29775	NSP12a	S6L	SNP	RNA-dependent RNA polymerase, pre-ribosomal frameshift	NSP12a:S6L	C13458T
EPI_ISL_460976	13458	C	T	13404	29775	NSP12a	S6L	SNP	RNA-dependent RNA polymerase, pre-ribosomal frameshift	NSP12a:S6L	C13458T
EPI_ISL_460978	13458	C	T	13404	29775	NSP12a	S6L	SNP	RNA-dependent RNA polymerase, pre-ribosomal frameshift	NSP12a:S6L	C13458T
EPI_ISL_460979	13458	C	T	13404	29775	NSP12a	S6L	SNP	RNA-dependent RNA polymerase, pre-ribosomal frameshift	NSP12a:S6L	C13458T
EPI_ISL_460981	13458	C	T	13404	29775	NSP12a	S6L	SNP	RNA-dependent RNA polymerase, pre-ribosomal frameshift	NSP12a:S6L	C13458T
EPI_ISL_460983	13458	C	T	13404	29775	NSP12a	S6L	SNP	RNA-dependent RNA polymerase, pre-ribosomal frameshift	NSP12a:S6L	C13458T
EPI_ISL_460984	13458	C	T	13404	29775	NSP12a	S6L	SNP	RNA-dependent RNA polymerase, pre-ribosomal frameshift	NSP12a:S6L	C13458T
EPI_ISL_460985	13458	C	T	13404	29775	NSP12a	S6L	SNP	RNA-dependent RNA polymerase, pre-ribosomal frameshift	NSP12a:S6L	C13458T
EPI_ISL_460994	13458	C	T	13404	29775	NSP12a	S6L	SNP	RNA-dependent RNA polymerase, pre-ribosomal frameshift	NSP12a:S6L	C13458T
EPI_ISL_460995	13458	C	T	13404	29775	NSP12a	S6L	SNP	RNA-dependent RNA polymerase, pre-ribosomal frameshift	NSP12a:S6L	C13458T
EPI_ISL_460996	13458	C	T	13404	29775	NSP12a	S6L	SNP	RNA-dependent RNA polymerase, pre-ribosomal frameshift	NSP12a:S6L	C13458T
EPI_ISL_460998	13458	C	T	13404	29775	NSP12a	S6L	SNP	RNA-dependent RNA polymerase, pre-ribosomal frameshift	NSP12a:S6L	C13458T
EPI_ISL_473049	13458	C	T	13428	29873	NSP12a	S6L	SNP	RNA-dependent RNA polymerase, pre-ribosomal frameshift	NSP12a:S6L	C13458T
EPI_ISL_474179	13458	C	T	13458	29903	NSP12a	S6L	SNP	RNA-dependent RNA polymerase, pre-ribosomal frameshift	NSP12a:S6L	C13458T
EPI_ISL_448337	13458	C	T	13419	29864	NSP12a	S6L	SNP	RNA-dependent RNA polymerase, pre-ribosomal frameshift	NSP12a:S6L	C13458T
EPI_ISL_448931	13458	C	T	13417	29862	NSP12a	S6L	SNP	RNA-dependent RNA polymerase, pre-ribosomal frameshift	NSP12a:S6L	C13458T
EPI_ISL_453481	13458	C	T	13417	29862	NSP12a	S6L	SNP	RNA-dependent RNA polymerase, pre-ribosomal frameshift	NSP12a:S6L	C13458T
EPI_ISL_441235	13458	C	T	13404	29849	NSP12a	S6L	SNP	RNA-dependent RNA polymerase, pre-ribosomal frameshift	NSP12a:S6L	C13458T
EPI_ISL_448368	13458	C	T	13428	29873	NSP12a	S6L	SNP	RNA-dependent RNA polymerase, pre-ribosomal frameshift	NSP12a:S6L	C13458T
EPI_ISL_471584	13458	C	T	13425	29833	NSP12a	S6L	SNP	RNA-dependent RNA polymerase, pre-ribosomal frameshift	NSP12a:S6L	C13458T
EPI_ISL_447864	13458	C	T	13423	29825	NSP12a	S6L	SNP	RNA-dependent RNA polymerase, pre-ribosomal frameshift	NSP12a:S6L	C13458T
EPI_ISL_447583	13458	C	T	13422	29867	NSP12a	S6L	SNP	RNA-dependent RNA polymerase, pre-ribosomal frameshift	NSP12a:S6L	C13458T
EPI_ISL_458077	13458	C	T	13428	29839	NSP12a	S6L	SNP	RNA-dependent RNA polymerase, pre-ribosomal frameshift	NSP12a:S6L	C13458T
EPI_ISL_471586	13458	C	T	13425	29833	NSP12a	S6L	SNP	RNA-dependent RNA polymerase, pre-ribosomal frameshift	NSP12a:S6L	C13458T
EPI_ISL_471587	13458	C	T	13429	29840	NSP12a	S6L	SNP	RNA-dependent RNA polymerase, pre-ribosomal frameshift	NSP12a:S6L	C13458T
EPI_ISL_433801	13458	C	T	13458	29903	NSP12a	S6L	SNP	RNA-dependent RNA polymerase, pre-ribosomal frameshift	NSP12a:S6L	C13458T
EPI_ISL_439623	13458	C	T	13404	29812	NSP12a	S6L	SNP	RNA-dependent RNA polymerase, pre-ribosomal frameshift	NSP12a:S6L	C13458T
EPI_ISL_442194	13458	C	T	13454	29899	NSP12a	S6L	SNP	RNA-dependent RNA polymerase, pre-ribosomal frameshift	NSP12a:S6L	C13458T
EPI_ISL_437854	13459	G	T	13428	29843	NSP12a	S6S	SNP_silent	RNA-dependent RNA polymerase, pre-ribosomal frameshift	NSP12a:S6S	G13459T
EPI_ISL_439934	13459	G	T	13405	29782	NSP12a	S6S	SNP_silent	RNA-dependent RNA polymerase, pre-ribosomal frameshift	NSP12a:S6S	G13459T
EPI_ISL_447401	13459	G	T	13460	29892	NSP12a	S6S	SNP_silent	RNA-dependent RNA polymerase, pre-ribosomal frameshift	NSP12a:S6S	G13459T
EPI_ISL_427004	13463	.	T	13464	29904	NSP12a	F7	insertion_frameshift	RNA-dependent RNA polymerase, pre-ribosomal frameshift	NSP12a:F7	.13463T
EPI_ISL_417919	13469	G	A	13469	29908	NSP12b	R1Q	SNP	RNA-dependent RNA polymerase, post-ribosomal frameshift	NSP12b:R1Q	G13469A
EPI_ISL_447333	13472	T	C	13473	29892	NSP12b	V2A	SNP	RNA-dependent RNA polymerase, post-ribosomal frameshift	NSP12b:V2A	T13472C
EPI_ISL_456806	13475	G	T	13421	29782	NSP12b	C3F	SNP	RNA-dependent RNA polymerase, post-ribosomal frameshift	NSP12b:C3F	G13475T
EPI_ISL_417413	13476	C	T	13476	29903	NSP12b	C3C	SNP_silent	RNA-dependent RNA polymerase, post-ribosomal frameshift	NSP12b:C3C	C13476T
EPI_ISL_437329	13476	C	T	13470	29883	NSP12b	C3C	SNP_silent	RNA-dependent RNA polymerase, post-ribosomal frameshift	NSP12b:C3C	C13476T
EPI_ISL_437334	13476	C	T	13470	29887	NSP12b	C3C	SNP_silent	RNA-dependent RNA polymerase, post-ribosomal frameshift	NSP12b:C3C	C13476T
EPI_ISL_433918	13476	C	T	13476	29903	NSP12b	C3C	SNP_silent	RNA-dependent RNA polymerase, post-ribosomal frameshift	NSP12b:C3C	C13476T
EPI_ISL_435057	13476	C	T	13522	30093	NSP12b	C3C	SNP_silent	RNA-dependent RNA polymerase, post-ribosomal frameshift	NSP12b:C3C	C13476T
EPI_ISL_463466	13476	C	T	13476	29903	NSP12b	C3C	SNP_silent	RNA-dependent RNA polymerase, post-ribosomal frameshift	NSP12b:C3C	C13476T
EPI_ISL_470375	13476	C	T	13422	29782	NSP12b	C3C	SNP_silent	RNA-dependent RNA polymerase, post-ribosomal frameshift	NSP12b:C3C	C13476T
EPI_ISL_437307	13476	C	T	13470	29897	NSP12b	C3C	SNP_silent	RNA-dependent RNA polymerase, post-ribosomal frameshift	NSP12b:C3C	C13476T
EPI_ISL_417189	13476	C	T	13422	29610	NSP12b	C3C	SNP_silent	RNA-dependent RNA polymerase, post-ribosomal frameshift	NSP12b:C3C	C13476T
EPI_ISL_448576	13486	G	A	13486	29903	NSP12b	A7T	SNP	RNA-dependent RNA polymerase, post-ribosomal frameshift	NSP12b:A7T	G13486A
EPI_ISL_445036	13487	C	T	13475	29855	NSP12b	A7V	SNP	RNA-dependent RNA polymerase, post-ribosomal frameshift	NSP12b:A7V	C13487T
EPI_ISL_428787	13487	C	T	13487	29903	NSP12b	A7V	SNP	RNA-dependent RNA polymerase, post-ribosomal frameshift	NSP12b:A7V	C13487T
EPI_ISL_436601	13487	C	T	13433	29782	NSP12b	A7V	SNP	RNA-dependent RNA polymerase, post-ribosomal frameshift	NSP12b:A7V	C13487T
EPI_ISL_443209	13487	C	T	13487	29891	NSP12b	A7V	SNP	RNA-dependent RNA polymerase, post-ribosomal frameshift	NSP12b:A7V	C13487T
EPI_ISL_454415	13487	C	T	13462	29834	NSP12b	A7V	SNP	RNA-dependent RNA polymerase, post-ribosomal frameshift	NSP12b:A7V	C13487T
EPI_ISL_451194	13489	G	A	13453	29815	NSP12b	A8T	SNP	RNA-dependent RNA polymerase, post-ribosomal frameshift	NSP12b:A8T	G13489A
EPI_ISL_417413	13492	C	T	13492	29903	NSP12b	R9C	SNP	RNA-dependent RNA polymerase, post-ribosomal frameshift	NSP12b:R9C	C13492T
EPI_ISL_414506	13494	T	C	13494	29903	NSP12b	R9R	SNP_silent	RNA-dependent RNA polymerase, post-ribosomal frameshift	NSP12b:R9R	T13494C
EPI_ISL_463001	13495	C	T	13455	29646	NSP12b	L10F	SNP	RNA-dependent RNA polymerase, post-ribosomal frameshift	NSP12b:L10F	C13495T
EPI_ISL_468033	13499	C	T	13498	29902	NSP12b	T11I	SNP	RNA-dependent RNA polymerase, post-ribosomal frameshift	NSP12b:T11I	C13499T
EPI_ISL_444825	13499	C	T	13499	29903	NSP12b	T11I	SNP	RNA-dependent RNA polymerase, post-ribosomal frameshift	NSP12b:T11I	C13499T
EPI_ISL_444834	13499	C	T	13499	29903	NSP12b	T11I	SNP	RNA-dependent RNA polymerase, post-ribosomal frameshift	NSP12b:T11I	C13499T
EPI_ISL_472598	13499	C	T	13497	29901	NSP12b	T11I	SNP	RNA-dependent RNA polymerase, post-ribosomal frameshift	NSP12b:T11I	C13499T
EPI_ISL_441406	13499	C	T	13484	29888	NSP12b	T11I	SNP	RNA-dependent RNA polymerase, post-ribosomal frameshift	NSP12b:T11I	C13499T
EPI_ISL_441408	13499	C	T	13492	29896	NSP12b	T11I	SNP	RNA-dependent RNA polymerase, post-ribosomal frameshift	NSP12b:T11I	C13499T
EPI_ISL_447387	13500	A	G	13501	29892	NSP12b	T11T	SNP_silent	RNA-dependent RNA polymerase, post-ribosomal frameshift	NSP12b:T11T	A13500G
EPI_ISL_447406	13500	A	G	13501	29892	NSP12b	T11T	SNP_silent	RNA-dependent RNA polymerase, post-ribosomal frameshift	NSP12b:T11T	A13500G
EPI_ISL_420686	13501	C	T	13501	29903	NSP12b	P12S	SNP	RNA-dependent RNA polymerase, post-ribosomal frameshift	NSP12b:P12S	C13501T
EPI_ISL_420687	13501	C	T	13501	29903	NSP12b	P12S	SNP	RNA-dependent RNA polymerase, post-ribosomal frameshift	NSP12b:P12S	C13501T
EPI_ISL_440700	13501	C	T	13447	29782	NSP12b	P12S	SNP	RNA-dependent RNA polymerase, post-ribosomal frameshift	NSP12b:P12S	C13501T
EPI_ISL_440736	13501	C	T	13447	29782	NSP12b	P12S	SNP	RNA-dependent RNA polymerase, post-ribosomal frameshift	NSP12b:P12S	C13501T
EPI_ISL_442706	13501	C	T	13447	29782	NSP12b	P12S	SNP	RNA-dependent RNA polymerase, post-ribosomal frameshift	NSP12b:P12S	C13501T
EPI_ISL_443855	13501	C	T	13447	29782	NSP12b	P12S	SNP	RNA-dependent RNA polymerase, post-ribosomal frameshift	NSP12b:P12S	C13501T
EPI_ISL_447337	13501	C	T	13502	29892	NSP12b	P12S	SNP	RNA-dependent RNA polymerase, post-ribosomal frameshift	NSP12b:P12S	C13501T
EPI_ISL_458796	13501	C	T	13447	29782	NSP12b	P12S	SNP	RNA-dependent RNA polymerase, post-ribosomal frameshift	NSP12b:P12S	C13501T
EPI_ISL_459062	13501	C	T	13447	29782	NSP12b	P12S	SNP	RNA-dependent RNA polymerase, post-ribosomal frameshift	NSP12b:P12S	C13501T
EPI_ISL_427749	13501	C	T	13237	29412	NSP12b	P12S	SNP	RNA-dependent RNA polymerase, post-ribosomal frameshift	NSP12b:P12S	C13501T
EPI_ISL_417432	13501	C	T	13501	29903	NSP12b	P12S	SNP	RNA-dependent RNA polymerase, post-ribosomal frameshift	NSP12b:P12S	C13501T
EPI_ISL_423719	13501	C	T	13501	29903	NSP12b	P12S	SNP	RNA-dependent RNA polymerase, post-ribosomal frameshift	NSP12b:P12S	C13501T
EPI_ISL_445157	13502	C	T	13502	29903	NSP12b	P12L	SNP	RNA-dependent RNA polymerase, post-ribosomal frameshift	NSP12b:P12L	C13502T
EPI_ISL_455163	13502	C	T	13448	29775	NSP12b	P12L	SNP	RNA-dependent RNA polymerase, post-ribosomal frameshift	NSP12b:P12L	C13502T
EPI_ISL_414023	13503	G	T	13492	29891	NSP12b	P12P	SNP_silent	RNA-dependent RNA polymerase, post-ribosomal frameshift	NSP12b:P12P	G13503T
EPI_ISL_415459	13503	G	T	13492	29892	NSP12b	P12P	SNP_silent	RNA-dependent RNA polymerase, post-ribosomal frameshift	NSP12b:P12P	G13503T
EPI_ISL_436620	13503	G	A	13449	29782	NSP12b	P12P	SNP_silent	RNA-dependent RNA polymerase, post-ribosomal frameshift	NSP12b:P12P	G13503A
EPI_ISL_455900	13506	C	T	13506	29903	NSP12b	C13C	SNP_silent	RNA-dependent RNA polymerase, post-ribosomal frameshift	NSP12b:C13C	C13506T
EPI_ISL_416412	13506	C	T	13496	29893	NSP12b	C13C	SNP_silent	RNA-dependent RNA polymerase, post-ribosomal frameshift	NSP12b:C13C	C13506T
EPI_ISL_463022	13506	C	T	13506	29685	NSP12b	C13C	SNP_silent	RNA-dependent RNA polymerase, post-ribosomal frameshift	NSP12b:C13C	C13506T
EPI_ISL_435636	13510	A	G	13510	29903	NSP12b	T15A	SNP	RNA-dependent RNA polymerase, post-ribosomal frameshift	NSP12b:T15A	A13510G
EPI_ISL_465083	13511	C	T	13511	29903	NSP12b	T15I	SNP	RNA-dependent RNA polymerase, post-ribosomal frameshift	NSP12b:T15I	C13511T
EPI_ISL_458225	13511	C	T	13457	29782	NSP12b	T15I	SNP	RNA-dependent RNA polymerase, post-ribosomal frameshift	NSP12b:T15I	C13511T
EPI_ISL_437812	13511	C	T	13504	29912	NSP12b	T15I	SNP	RNA-dependent RNA polymerase, post-ribosomal frameshift	NSP12b:T15I	C13511T
EPI_ISL_424171	13512	AGG	TTA	13346	29737	NSP12b	G16Y	SNP	RNA-dependent RNA polymerase, post-ribosomal frameshift	NSP12b:G16Y	AGG13512TTA
EPI_ISL_424174	13512	AGG	TTA	13298	29689	NSP12b	G16Y	SNP	RNA-dependent RNA polymerase, post-ribosomal frameshift	NSP12b:G16Y	AGG13512TTA
EPI_ISL_427234	13512	AGG	TTA	13481	29872	NSP12b	G16Y	SNP	RNA-dependent RNA polymerase, post-ribosomal frameshift	NSP12b:G16Y	AGG13512TTA
EPI_ISL_427240	13512	AGG	TTA	13447	29838	NSP12b	G16Y	SNP	RNA-dependent RNA polymerase, post-ribosomal frameshift	NSP12b:G16Y	AGG13512TTA
EPI_ISL_423012	13512	AG	TT	13252	29668	NSP12b	G16C	SNP	RNA-dependent RNA polymerase, post-ribosomal frameshift	NSP12b:G16C	AG13512TT
EPI_ISL_424167	13512	AGG	TTA	13248	29564	NSP12b	G16Y	SNP	RNA-dependent RNA polymerase, post-ribosomal frameshift	NSP12b:G16Y	AGG13512TTA
EPI_ISL_418874	13512	AGG	TTA	13063	29454	NSP12b	G16Y	SNP	RNA-dependent RNA polymerase, post-ribosomal frameshift	NSP12b:G16Y	AGG13512TTA
EPI_ISL_416694	13512	AGG	TTA	13505	29893	NSP12b	G16Y	SNP	RNA-dependent RNA polymerase, post-ribosomal frameshift	NSP12b:G16Y	AGG13512TTA
EPI_ISL_426055	13515	C	T	13505	29907	NSP12b	G16G	SNP_silent	RNA-dependent RNA polymerase, post-ribosomal frameshift	NSP12b:G16G	C13515T
EPI_ISL_430946	13517	C	T	13506	29910	NSP12b	T17I	SNP	RNA-dependent RNA polymerase, post-ribosomal frameshift	NSP12b:T17I	C13517T
EPI_ISL_417019	13517	C	T	13463	29782	NSP12b	T17I	SNP	RNA-dependent RNA polymerase, post-ribosomal frameshift	NSP12b:T17I	C13517T
EPI_ISL_419576	13517	C	T	13517	29863	NSP12b	T17I	SNP	RNA-dependent RNA polymerase, post-ribosomal frameshift	NSP12b:T17I	C13517T
EPI_ISL_421729	13517	C	T	13517	29903	NSP12b	T17I	SNP	RNA-dependent RNA polymerase, post-ribosomal frameshift	NSP12b:T17I	C13517T
EPI_ISL_428725	13517	C	T	13463	29782	NSP12b	T17I	SNP	RNA-dependent RNA polymerase, post-ribosomal frameshift	NSP12b:T17I	C13517T
EPI_ISL_428947	13517	C	T	13517	29860	NSP12b	T17I	SNP	RNA-dependent RNA polymerase, post-ribosomal frameshift	NSP12b:T17I	C13517T
EPI_ISL_428960	13517	C	T	13517	29874	NSP12b	T17I	SNP	RNA-dependent RNA polymerase, post-ribosomal frameshift	NSP12b:T17I	C13517T
EPI_ISL_428961	13517	C	T	13517	29869	NSP12b	T17I	SNP	RNA-dependent RNA polymerase, post-ribosomal frameshift	NSP12b:T17I	C13517T
EPI_ISL_429137	13517	C	T	13517	29903	NSP12b	T17I	SNP	RNA-dependent RNA polymerase, post-ribosomal frameshift	NSP12b:T17I	C13517T
EPI_ISL_429734	13517	C	T	13517	29860	NSP12b	T17I	SNP	RNA-dependent RNA polymerase, post-ribosomal frameshift	NSP12b:T17I	C13517T
EPI_ISL_429798	13517	C	T	13517	29879	NSP12b	T17I	SNP	RNA-dependent RNA polymerase, post-ribosomal frameshift	NSP12b:T17I	C13517T
EPI_ISL_433957	13517	C	T	13517	29903	NSP12b	T17I	SNP	RNA-dependent RNA polymerase, post-ribosomal frameshift	NSP12b:T17I	C13517T
EPI_ISL_434620	13517	C	T	13517	29903	NSP12b	T17I	SNP	RNA-dependent RNA polymerase, post-ribosomal frameshift	NSP12b:T17I	C13517T
EPI_ISL_434629	13517	C	T	13517	29903	NSP12b	T17I	SNP	RNA-dependent RNA polymerase, post-ribosomal frameshift	NSP12b:T17I	C13517T
EPI_ISL_434630	13517	C	T	13517	29903	NSP12b	T17I	SNP	RNA-dependent RNA polymerase, post-ribosomal frameshift	NSP12b:T17I	C13517T
EPI_ISL_434635	13517	C	T	13517	29903	NSP12b	T17I	SNP	RNA-dependent RNA polymerase, post-ribosomal frameshift	NSP12b:T17I	C13517T
EPI_ISL_435643	13517	C	T	13517	29903	NSP12b	T17I	SNP	RNA-dependent RNA polymerase, post-ribosomal frameshift	NSP12b:T17I	C13517T
EPI_ISL_437629	13517	C	T	13517	29903	NSP12b	T17I	SNP	RNA-dependent RNA polymerase, post-ribosomal frameshift	NSP12b:T17I	C13517T
EPI_ISL_439326	13517	C	T	13517	29903	NSP12b	T17I	SNP	RNA-dependent RNA polymerase, post-ribosomal frameshift	NSP12b:T17I	C13517T
EPI_ISL_442689	13517	C	T	13463	29812	NSP12b	T17I	SNP	RNA-dependent RNA polymerase, post-ribosomal frameshift	NSP12b:T17I	C13517T
EPI_ISL_444220	13517	C	T	13517	29903	NSP12b	T17I	SNP	RNA-dependent RNA polymerase, post-ribosomal frameshift	NSP12b:T17I	C13517T
EPI_ISL_449207	13517	C	T	13463	29782	NSP12b	T17I	SNP	RNA-dependent RNA polymerase, post-ribosomal frameshift	NSP12b:T17I	C13517T
EPI_ISL_451721	13517	C	T	13517	29903	NSP12b	T17I	SNP	RNA-dependent RNA polymerase, post-ribosomal frameshift	NSP12b:T17I	C13517T
EPI_ISL_456028	13517	C	T	13517	29903	NSP12b	T17I	SNP	RNA-dependent RNA polymerase, post-ribosomal frameshift	NSP12b:T17I	C13517T
EPI_ISL_458400	13517	C	T	13463	29783	NSP12b	T17I	SNP	RNA-dependent RNA polymerase, post-ribosomal frameshift	NSP12b:T17I	C13517T
EPI_ISL_462351	13517	C	T	13517	29891	NSP12b	T17I	SNP	RNA-dependent RNA polymerase, post-ribosomal frameshift	NSP12b:T17I	C13517T
EPI_ISL_429884	13517	C	T	13517	29891	NSP12b	T17I	SNP	RNA-dependent RNA polymerase, post-ribosomal frameshift	NSP12b:T17I	C13517T
EPI_ISL_456596	13517	C	T	13517	29903	NSP12b	T17I	SNP	RNA-dependent RNA polymerase, post-ribosomal frameshift	NSP12b:T17I	C13517T
EPI_ISL_456600	13517	C	T	13517	29903	NSP12b	T17I	SNP	RNA-dependent RNA polymerase, post-ribosomal frameshift	NSP12b:T17I	C13517T
EPI_ISL_469669	13519	A	G	13465	29782	NSP12b	S18G	SNP	RNA-dependent RNA polymerase, post-ribosomal frameshift	NSP12b:S18G	A13519G
EPI_ISL_429324	13520	G	A	13520	29903	NSP12b	S18N	SNP	RNA-dependent RNA polymerase, post-ribosomal frameshift	NSP12b:S18N	G13520A
EPI_ISL_446915	13520	G	A	13482	29865	NSP12b	S18N	SNP	RNA-dependent RNA polymerase, post-ribosomal frameshift	NSP12b:S18N	G13520A
EPI_ISL_414625	13521	T	C	13521	29903	NSP12b	S18S	SNP_silent	RNA-dependent RNA polymerase, post-ribosomal frameshift	NSP12b:S18S	T13521C
EPI_ISL_458296	13522	A	G	13497	29834	NSP12b	T19A	SNP	RNA-dependent RNA polymerase, post-ribosomal frameshift	NSP12b:T19A	A13522G
EPI_ISL_451968	13524	T	C	13528	29614	NSP12b	T19T	SNP_silent	RNA-dependent RNA polymerase, post-ribosomal frameshift	NSP12b:T19T	T13524C
EPI_ISL_439765	13527	T	A	13527	29903	NSP12b	D20E	SNP	RNA-dependent RNA polymerase, post-ribosomal frameshift	NSP12b:D20E	T13527A
EPI_ISL_439771	13527	T	A	13527	29903	NSP12b	D20E	SNP	RNA-dependent RNA polymerase, post-ribosomal frameshift	NSP12b:D20E	T13527A
EPI_ISL_439801	13527	T	A	13527	29903	NSP12b	D20E	SNP	RNA-dependent RNA polymerase, post-ribosomal frameshift	NSP12b:D20E	T13527A
EPI_ISL_439826	13527	T	A	13527	29903	NSP12b	D20E	SNP	RNA-dependent RNA polymerase, post-ribosomal frameshift	NSP12b:D20E	T13527A
EPI_ISL_440889	13527	T	A	13527	29903	NSP12b	D20E	SNP	RNA-dependent RNA polymerase, post-ribosomal frameshift	NSP12b:D20E	T13527A
EPI_ISL_472192	13530	C	T	13530	29903	NSP12b	V21V	SNP_silent	RNA-dependent RNA polymerase, post-ribosomal frameshift	NSP12b:V21V	C13530T
EPI_ISL_425132	13531	G	A	13531	29903	NSP12b	V22I	SNP	RNA-dependent RNA polymerase, post-ribosomal frameshift	NSP12b:V22I	G13531A
EPI_ISL_418372	13532	T	C	13531	29881	NSP12b	V22A	SNP	RNA-dependent RNA polymerase, post-ribosomal frameshift	NSP12b:V22A	T13532C
EPI_ISL_443205	13532	T	C	13532	29891	NSP12b	V22A	SNP	RNA-dependent RNA polymerase, post-ribosomal frameshift	NSP12b:V22A	T13532C
EPI_ISL_413752	13533	ATACAGG	.	13295	29358	NSP12b	V22	deletion_frameshift	RNA-dependent RNA polymerase, post-ribosomal frameshift	NSP12b:V22	ATACAGG13533.
EPI_ISL_460601	13534	T	C	13534	29903	NSP12b	Y23H	SNP	RNA-dependent RNA polymerase, post-ribosomal frameshift	NSP12b:Y23H	T13534C
EPI_ISL_428881	13536	C	T	13536	29903	NSP12b	Y23Y	SNP_silent	RNA-dependent RNA polymerase, post-ribosomal frameshift	NSP12b:Y23Y	C13536T
EPI_ISL_423472	13536	C	T	13536	29903	NSP12b	Y23Y	SNP_silent	RNA-dependent RNA polymerase, post-ribosomal frameshift	NSP12b:Y23Y	C13536T
EPI_ISL_430916	13536	C	T	13513	29847	NSP12b	Y23Y	SNP_silent	RNA-dependent RNA polymerase, post-ribosomal frameshift	NSP12b:Y23Y	C13536T
EPI_ISL_429273	13536	C	T	13536	29903	NSP12b	Y23Y	SNP_silent	RNA-dependent RNA polymerase, post-ribosomal frameshift	NSP12b:Y23Y	C13536T
EPI_ISL_435117	13536	C	T	13498	29799	NSP12b	Y23Y	SNP_silent	RNA-dependent RNA polymerase, post-ribosomal frameshift	NSP12b:Y23Y	C13536T
EPI_ISL_435118	13536	C	T	13498	29710	NSP12b	Y23Y	SNP_silent	RNA-dependent RNA polymerase, post-ribosomal frameshift	NSP12b:Y23Y	C13536T
EPI_ISL_465198	13536	C	T	13536	29903	NSP12b	Y23Y	SNP_silent	RNA-dependent RNA polymerase, post-ribosomal frameshift	NSP12b:Y23Y	C13536T
EPI_ISL_453765	13536	C	T	13536	29903	NSP12b	Y23Y	SNP_silent	RNA-dependent RNA polymerase, post-ribosomal frameshift	NSP12b:Y23Y	C13536T
EPI_ISL_448417	13536	C	T	13536	29903	NSP12b	Y23Y	SNP_silent	RNA-dependent RNA polymerase, post-ribosomal frameshift	NSP12b:Y23Y	C13536T
EPI_ISL_453624	13536	C	T	13536	29903	NSP12b	Y23Y	SNP_silent	RNA-dependent RNA polymerase, post-ribosomal frameshift	NSP12b:Y23Y	C13536T
EPI_ISL_453647	13536	C	T	13536	29903	NSP12b	Y23Y	SNP_silent	RNA-dependent RNA polymerase, post-ribosomal frameshift	NSP12b:Y23Y	C13536T
EPI_ISL_413556	13536	C	T	13482	29782	NSP12b	Y23Y	SNP_silent	RNA-dependent RNA polymerase, post-ribosomal frameshift	NSP12b:Y23Y	C13536T
EPI_ISL_415656	13536	C	T	13482	29782	NSP12b	Y23Y	SNP_silent	RNA-dependent RNA polymerase, post-ribosomal frameshift	NSP12b:Y23Y	C13536T
EPI_ISL_415916	13536	C	T	13482	29782	NSP12b	Y23Y	SNP_silent	RNA-dependent RNA polymerase, post-ribosomal frameshift	NSP12b:Y23Y	C13536T
EPI_ISL_415977	13536	C	T	13482	29782	NSP12b	Y23Y	SNP_silent	RNA-dependent RNA polymerase, post-ribosomal frameshift	NSP12b:Y23Y	C13536T
EPI_ISL_415991	13536	C	T	13482	29782	NSP12b	Y23Y	SNP_silent	RNA-dependent RNA polymerase, post-ribosomal frameshift	NSP12b:Y23Y	C13536T
EPI_ISL_416140	13536	C	T	13506	29832	NSP12b	Y23Y	SNP_silent	RNA-dependent RNA polymerase, post-ribosomal frameshift	NSP12b:Y23Y	C13536T
EPI_ISL_417265	13536	C	T	13536	29903	NSP12b	Y23Y	SNP_silent	RNA-dependent RNA polymerase, post-ribosomal frameshift	NSP12b:Y23Y	C13536T
EPI_ISL_417273	13536	C	T	13536	29903	NSP12b	Y23Y	SNP_silent	RNA-dependent RNA polymerase, post-ribosomal frameshift	NSP12b:Y23Y	C13536T
EPI_ISL_417307	13536	C	T	13536	29903	NSP12b	Y23Y	SNP_silent	RNA-dependent RNA polymerase, post-ribosomal frameshift	NSP12b:Y23Y	C13536T
EPI_ISL_417581	13536	C	T	13536	29903	NSP12b	Y23Y	SNP_silent	RNA-dependent RNA polymerase, post-ribosomal frameshift	NSP12b:Y23Y	C13536T
EPI_ISL_417642	13536	C	T	13536	29903	NSP12b	Y23Y	SNP_silent	RNA-dependent RNA polymerase, post-ribosomal frameshift	NSP12b:Y23Y	C13536T
EPI_ISL_417643	13536	C	T	13536	29903	NSP12b	Y23Y	SNP_silent	RNA-dependent RNA polymerase, post-ribosomal frameshift	NSP12b:Y23Y	C13536T
EPI_ISL_418090	13536	C	T	13534	29871	NSP12b	Y23Y	SNP_silent	RNA-dependent RNA polymerase, post-ribosomal frameshift	NSP12b:Y23Y	C13536T
EPI_ISL_418093	13536	C	T	13532	29869	NSP12b	Y23Y	SNP_silent	RNA-dependent RNA polymerase, post-ribosomal frameshift	NSP12b:Y23Y	C13536T
EPI_ISL_418096	13536	C	T	13536	29851	NSP12b	Y23Y	SNP_silent	RNA-dependent RNA polymerase, post-ribosomal frameshift	NSP12b:Y23Y	C13536T
EPI_ISL_418389	13536	C	T	13538	29811	NSP12b	Y23Y	SNP_silent	RNA-dependent RNA polymerase, post-ribosomal frameshift	NSP12b:Y23Y	C13536T
EPI_ISL_420031	13536	C	T	13499	29649	NSP12b	Y23Y	SNP_silent	RNA-dependent RNA polymerase, post-ribosomal frameshift	NSP12b:Y23Y	C13536T
EPI_ISL_420154	13536	C	T	13536	29903	NSP12b	Y23Y	SNP_silent	RNA-dependent RNA polymerase, post-ribosomal frameshift	NSP12b:Y23Y	C13536T
EPI_ISL_420215	13536	C	T	13536	29903	NSP12b	Y23Y	SNP_silent	RNA-dependent RNA polymerase, post-ribosomal frameshift	NSP12b:Y23Y	C13536T
EPI_ISL_420217	13536	C	T	13536	29903	NSP12b	Y23Y	SNP_silent	RNA-dependent RNA polymerase, post-ribosomal frameshift	NSP12b:Y23Y	C13536T
EPI_ISL_420262	13536	C	T	13536	29903	NSP12b	Y23Y	SNP_silent	RNA-dependent RNA polymerase, post-ribosomal frameshift	NSP12b:Y23Y	C13536T
EPI_ISL_420393	13536	C	T	13482	29782	NSP12b	Y23Y	SNP_silent	RNA-dependent RNA polymerase, post-ribosomal frameshift	NSP12b:Y23Y	C13536T
EPI_ISL_420400	13536	C	T	13482	29782	NSP12b	Y23Y	SNP_silent	RNA-dependent RNA polymerase, post-ribosomal frameshift	NSP12b:Y23Y	C13536T
EPI_ISL_420402	13536	C	T	13482	29782	NSP12b	Y23Y	SNP_silent	RNA-dependent RNA polymerase, post-ribosomal frameshift	NSP12b:Y23Y	C13536T
EPI_ISL_420408	13536	C	T	13482	29782	NSP12b	Y23Y	SNP_silent	RNA-dependent RNA polymerase, post-ribosomal frameshift	NSP12b:Y23Y	C13536T
EPI_ISL_420723	13536	C	T	13536	29903	NSP12b	Y23Y	SNP_silent	RNA-dependent RNA polymerase, post-ribosomal frameshift	NSP12b:Y23Y	C13536T
EPI_ISL_420849	13536	C	T	13521	29734	NSP12b	Y23Y	SNP_silent	RNA-dependent RNA polymerase, post-ribosomal frameshift	NSP12b:Y23Y	C13536T
EPI_ISL_421003	13536	C	T	13536	29903	NSP12b	Y23Y	SNP_silent	RNA-dependent RNA polymerase, post-ribosomal frameshift	NSP12b:Y23Y	C13536T
EPI_ISL_421275	13536	C	T	13536	29891	NSP12b	Y23Y	SNP_silent	RNA-dependent RNA polymerase, post-ribosomal frameshift	NSP12b:Y23Y	C13536T
EPI_ISL_421820	13536	C	T	13536	29903	NSP12b	Y23Y	SNP_silent	RNA-dependent RNA polymerase, post-ribosomal frameshift	NSP12b:Y23Y	C13536T
EPI_ISL_422186	13536	C	T	13534	29901	NSP12b	Y23Y	SNP_silent	RNA-dependent RNA polymerase, post-ribosomal frameshift	NSP12b:Y23Y	C13536T
EPI_ISL_422236	13536	C	T	13536	29903	NSP12b	Y23Y	SNP_silent	RNA-dependent RNA polymerase, post-ribosomal frameshift	NSP12b:Y23Y	C13536T
EPI_ISL_422682	13536	C	T	13482	29775	NSP12b	Y23Y	SNP_silent	RNA-dependent RNA polymerase, post-ribosomal frameshift	NSP12b:Y23Y	C13536T
EPI_ISL_422748	13536	C	T	13482	29775	NSP12b	Y23Y	SNP_silent	RNA-dependent RNA polymerase, post-ribosomal frameshift	NSP12b:Y23Y	C13536T
EPI_ISL_422937	13536	C	T	13482	29775	NSP12b	Y23Y	SNP_silent	RNA-dependent RNA polymerase, post-ribosomal frameshift	NSP12b:Y23Y	C13536T
EPI_ISL_423071	13536	C	T	13536	29903	NSP12b	Y23Y	SNP_silent	RNA-dependent RNA polymerase, post-ribosomal frameshift	NSP12b:Y23Y	C13536T
EPI_ISL_423103	13536	C	T	13536	29903	NSP12b	Y23Y	SNP_silent	RNA-dependent RNA polymerase, post-ribosomal frameshift	NSP12b:Y23Y	C13536T
EPI_ISL_423104	13536	C	T	13536	29903	NSP12b	Y23Y	SNP_silent	RNA-dependent RNA polymerase, post-ribosomal frameshift	NSP12b:Y23Y	C13536T
EPI_ISL_423207	13536	C	T	13536	29903	NSP12b	Y23Y	SNP_silent	RNA-dependent RNA polymerase, post-ribosomal frameshift	NSP12b:Y23Y	C13536T
EPI_ISL_423217	13536	C	T	13536	29903	NSP12b	Y23Y	SNP_silent	RNA-dependent RNA polymerase, post-ribosomal frameshift	NSP12b:Y23Y	C13536T
EPI_ISL_423301	13536	C	T	13536	29903	NSP12b	Y23Y	SNP_silent	RNA-dependent RNA polymerase, post-ribosomal frameshift	NSP12b:Y23Y	C13536T
EPI_ISL_423967	13536	C	T	13536	29903	NSP12b	Y23Y	SNP_silent	RNA-dependent RNA polymerase, post-ribosomal frameshift	NSP12b:Y23Y	C13536T
EPI_ISL_423974	13536	C	T	13536	29903	NSP12b	Y23Y	SNP_silent	RNA-dependent RNA polymerase, post-ribosomal frameshift	NSP12b:Y23Y	C13536T
EPI_ISL_423975	13536	C	T	13536	29903	NSP12b	Y23Y	SNP_silent	RNA-dependent RNA polymerase, post-ribosomal frameshift	NSP12b:Y23Y	C13536T
EPI_ISL_424004	13536	C	T	13536	29903	NSP12b	Y23Y	SNP_silent	RNA-dependent RNA polymerase, post-ribosomal frameshift	NSP12b:Y23Y	C13536T
EPI_ISL_424089	13536	C	T	13536	29903	NSP12b	Y23Y	SNP_silent	RNA-dependent RNA polymerase, post-ribosomal frameshift	NSP12b:Y23Y	C13536T
EPI_ISL_424093	13536	C	T	13536	29903	NSP12b	Y23Y	SNP_silent	RNA-dependent RNA polymerase, post-ribosomal frameshift	NSP12b:Y23Y	C13536T
EPI_ISL_424094	13536	C	T	13536	29903	NSP12b	Y23Y	SNP_silent	RNA-dependent RNA polymerase, post-ribosomal frameshift	NSP12b:Y23Y	C13536T
EPI_ISL_424095	13536	C	T	13536	29903	NSP12b	Y23Y	SNP_silent	RNA-dependent RNA polymerase, post-ribosomal frameshift	NSP12b:Y23Y	C13536T
EPI_ISL_424097	13536	C	T	13536	29903	NSP12b	Y23Y	SNP_silent	RNA-dependent RNA polymerase, post-ribosomal frameshift	NSP12b:Y23Y	C13536T
EPI_ISL_424098	13536	C	T	13536	29903	NSP12b	Y23Y	SNP_silent	RNA-dependent RNA polymerase, post-ribosomal frameshift	NSP12b:Y23Y	C13536T
EPI_ISL_424121	13536	C	T	13536	29903	NSP12b	Y23Y	SNP_silent	RNA-dependent RNA polymerase, post-ribosomal frameshift	NSP12b:Y23Y	C13536T
EPI_ISL_424124	13536	C	T	13536	29903	NSP12b	Y23Y	SNP_silent	RNA-dependent RNA polymerase, post-ribosomal frameshift	NSP12b:Y23Y	C13536T
EPI_ISL_424165	13536	C	T	13536	29903	NSP12b	Y23Y	SNP_silent	RNA-dependent RNA polymerase, post-ribosomal frameshift	NSP12b:Y23Y	C13536T
EPI_ISL_424497	13536	C	T	13536	29903	NSP12b	Y23Y	SNP_silent	RNA-dependent RNA polymerase, post-ribosomal frameshift	NSP12b:Y23Y	C13536T
EPI_ISL_424510	13536	C	T	13536	29903	NSP12b	Y23Y	SNP_silent	RNA-dependent RNA polymerase, post-ribosomal frameshift	NSP12b:Y23Y	C13536T
EPI_ISL_425242	13536	C	T	13536	29903	NSP12b	Y23Y	SNP_silent	RNA-dependent RNA polymerase, post-ribosomal frameshift	NSP12b:Y23Y	C13536T
EPI_ISL_425248	13536	C	T	13536	29903	NSP12b	Y23Y	SNP_silent	RNA-dependent RNA polymerase, post-ribosomal frameshift	NSP12b:Y23Y	C13536T
EPI_ISL_425275	13536	C	T	13536	29903	NSP12b	Y23Y	SNP_silent	RNA-dependent RNA polymerase, post-ribosomal frameshift	NSP12b:Y23Y	C13536T
EPI_ISL_425300	13536	C	T	13536	29903	NSP12b	Y23Y	SNP_silent	RNA-dependent RNA polymerase, post-ribosomal frameshift	NSP12b:Y23Y	C13536T
EPI_ISL_425386	13536	C	T	13536	29903	NSP12b	Y23Y	SNP_silent	RNA-dependent RNA polymerase, post-ribosomal frameshift	NSP12b:Y23Y	C13536T
EPI_ISL_425400	13536	C	T	13536	29903	NSP12b	Y23Y	SNP_silent	RNA-dependent RNA polymerase, post-ribosomal frameshift	NSP12b:Y23Y	C13536T
EPI_ISL_425443	13536	C	T	13536	29903	NSP12b	Y23Y	SNP_silent	RNA-dependent RNA polymerase, post-ribosomal frameshift	NSP12b:Y23Y	C13536T
EPI_ISL_426626	13536	C	T	13536	29903	NSP12b	Y23Y	SNP_silent	RNA-dependent RNA polymerase, post-ribosomal frameshift	NSP12b:Y23Y	C13536T
EPI_ISL_426662	13536	C	T	13532	29899	NSP12b	Y23Y	SNP_silent	RNA-dependent RNA polymerase, post-ribosomal frameshift	NSP12b:Y23Y	C13536T
EPI_ISL_426914	13536	C	T	13536	29903	NSP12b	Y23Y	SNP_silent	RNA-dependent RNA polymerase, post-ribosomal frameshift	NSP12b:Y23Y	C13536T
EPI_ISL_426985	13536	C	T	13536	29903	NSP12b	Y23Y	SNP_silent	RNA-dependent RNA polymerase, post-ribosomal frameshift	NSP12b:Y23Y	C13536T
EPI_ISL_427080	13536	C	T	13536	29903	NSP12b	Y23Y	SNP_silent	RNA-dependent RNA polymerase, post-ribosomal frameshift	NSP12b:Y23Y	C13536T
EPI_ISL_428236	13536	C	T	13536	29808	NSP12b	Y23Y	SNP_silent	RNA-dependent RNA polymerase, post-ribosomal frameshift	NSP12b:Y23Y	C13536T
EPI_ISL_428910	13536	C	T	13536	29903	NSP12b	Y23Y	SNP_silent	RNA-dependent RNA polymerase, post-ribosomal frameshift	NSP12b:Y23Y	C13536T
EPI_ISL_429116	13536	C	T	13536	29903	NSP12b	Y23Y	SNP_silent	RNA-dependent RNA polymerase, post-ribosomal frameshift	NSP12b:Y23Y	C13536T
EPI_ISL_430808	13536	C	T	13488	29810	NSP12b	Y23Y	SNP_silent	RNA-dependent RNA polymerase, post-ribosomal frameshift	NSP12b:Y23Y	C13536T
EPI_ISL_430809	13536	C	T	13488	29801	NSP12b	Y23Y	SNP_silent	RNA-dependent RNA polymerase, post-ribosomal frameshift	NSP12b:Y23Y	C13536T
EPI_ISL_430811	13536	C	T	13488	29810	NSP12b	Y23Y	SNP_silent	RNA-dependent RNA polymerase, post-ribosomal frameshift	NSP12b:Y23Y	C13536T
EPI_ISL_430812	13536	C	T	13487	29809	NSP12b	Y23Y	SNP_silent	RNA-dependent RNA polymerase, post-ribosomal frameshift	NSP12b:Y23Y	C13536T
EPI_ISL_430813	13536	C	T	13488	29798	NSP12b	Y23Y	SNP_silent	RNA-dependent RNA polymerase, post-ribosomal frameshift	NSP12b:Y23Y	C13536T
EPI_ISL_431012	13536	C	T	13498	29798	NSP12b	Y23Y	SNP_silent	RNA-dependent RNA polymerase, post-ribosomal frameshift	NSP12b:Y23Y	C13536T
EPI_ISL_431980	13536	C	T	13521	29888	NSP12b	Y23Y	SNP_silent	RNA-dependent RNA polymerase, post-ribosomal frameshift	NSP12b:Y23Y	C13536T
EPI_ISL_432302	13536	C	T	13532	29899	NSP12b	Y23Y	SNP_silent	RNA-dependent RNA polymerase, post-ribosomal frameshift	NSP12b:Y23Y	C13536T
EPI_ISL_432455	13536	C	T	13536	29903	NSP12b	Y23Y	SNP_silent	RNA-dependent RNA polymerase, post-ribosomal frameshift	NSP12b:Y23Y	C13536T
EPI_ISL_432459	13536	C	T	13536	29903	NSP12b	Y23Y	SNP_silent	RNA-dependent RNA polymerase, post-ribosomal frameshift	NSP12b:Y23Y	C13536T
EPI_ISL_432496	13536	C	T	13536	29903	NSP12b	Y23Y	SNP_silent	RNA-dependent RNA polymerase, post-ribosomal frameshift	NSP12b:Y23Y	C13536T
EPI_ISL_432502	13536	C	T	13536	29903	NSP12b	Y23Y	SNP_silent	RNA-dependent RNA polymerase, post-ribosomal frameshift	NSP12b:Y23Y	C13536T
EPI_ISL_432519	13536	C	T	13536	29903	NSP12b	Y23Y	SNP_silent	RNA-dependent RNA polymerase, post-ribosomal frameshift	NSP12b:Y23Y	C13536T
EPI_ISL_432525	13536	C	T	13536	29903	NSP12b	Y23Y	SNP_silent	RNA-dependent RNA polymerase, post-ribosomal frameshift	NSP12b:Y23Y	C13536T
EPI_ISL_432532	13536	C	T	13536	29903	NSP12b	Y23Y	SNP_silent	RNA-dependent RNA polymerase, post-ribosomal frameshift	NSP12b:Y23Y	C13536T
EPI_ISL_432541	13536	C	T	13536	29903	NSP12b	Y23Y	SNP_silent	RNA-dependent RNA polymerase, post-ribosomal frameshift	NSP12b:Y23Y	C13536T
EPI_ISL_432544	13536	C	T	13536	29903	NSP12b	Y23Y	SNP_silent	RNA-dependent RNA polymerase, post-ribosomal frameshift	NSP12b:Y23Y	C13536T
EPI_ISL_432552	13536	C	T	13536	29903	NSP12b	Y23Y	SNP_silent	RNA-dependent RNA polymerase, post-ribosomal frameshift	NSP12b:Y23Y	C13536T
EPI_ISL_432556	13536	C	T	13536	29903	NSP12b	Y23Y	SNP_silent	RNA-dependent RNA polymerase, post-ribosomal frameshift	NSP12b:Y23Y	C13536T
EPI_ISL_432599	13536	C	T	13536	29903	NSP12b	Y23Y	SNP_silent	RNA-dependent RNA polymerase, post-ribosomal frameshift	NSP12b:Y23Y	C13536T
EPI_ISL_432616	13536	C	T	13536	29903	NSP12b	Y23Y	SNP_silent	RNA-dependent RNA polymerase, post-ribosomal frameshift	NSP12b:Y23Y	C13536T
EPI_ISL_432645	13536	C	T	13536	29903	NSP12b	Y23Y	SNP_silent	RNA-dependent RNA polymerase, post-ribosomal frameshift	NSP12b:Y23Y	C13536T
EPI_ISL_432682	13536	C	T	13536	29903	NSP12b	Y23Y	SNP_silent	RNA-dependent RNA polymerase, post-ribosomal frameshift	NSP12b:Y23Y	C13536T
EPI_ISL_432776	13536	C	T	13536	29903	NSP12b	Y23Y	SNP_silent	RNA-dependent RNA polymerase, post-ribosomal frameshift	NSP12b:Y23Y	C13536T
EPI_ISL_432819	13536	C	T	13536	29903	NSP12b	Y23Y	SNP_silent	RNA-dependent RNA polymerase, post-ribosomal frameshift	NSP12b:Y23Y	C13536T
EPI_ISL_432826	13536	C	T	13536	29903	NSP12b	Y23Y	SNP_silent	RNA-dependent RNA polymerase, post-ribosomal frameshift	NSP12b:Y23Y	C13536T
EPI_ISL_432832	13536	C	T	13536	29903	NSP12b	Y23Y	SNP_silent	RNA-dependent RNA polymerase, post-ribosomal frameshift	NSP12b:Y23Y	C13536T
EPI_ISL_432838	13536	C	T	13536	29903	NSP12b	Y23Y	SNP_silent	RNA-dependent RNA polymerase, post-ribosomal frameshift	NSP12b:Y23Y	C13536T
EPI_ISL_432851	13536	C	T	13536	29903	NSP12b	Y23Y	SNP_silent	RNA-dependent RNA polymerase, post-ribosomal frameshift	NSP12b:Y23Y	C13536T
EPI_ISL_432853	13536	C	T	13536	29903	NSP12b	Y23Y	SNP_silent	RNA-dependent RNA polymerase, post-ribosomal frameshift	NSP12b:Y23Y	C13536T
EPI_ISL_432957	13536	C	T	13536	29903	NSP12b	Y23Y	SNP_silent	RNA-dependent RNA polymerase, post-ribosomal frameshift	NSP12b:Y23Y	C13536T
EPI_ISL_433001	13536	C	T	13536	29903	NSP12b	Y23Y	SNP_silent	RNA-dependent RNA polymerase, post-ribosomal frameshift	NSP12b:Y23Y	C13536T
EPI_ISL_433037	13536	C	T	13536	29903	NSP12b	Y23Y	SNP_silent	RNA-dependent RNA polymerase, post-ribosomal frameshift	NSP12b:Y23Y	C13536T
EPI_ISL_433710	13536	C	T	13536	29903	NSP12b	Y23Y	SNP_silent	RNA-dependent RNA polymerase, post-ribosomal frameshift	NSP12b:Y23Y	C13536T
EPI_ISL_433856	13536	C	T	13536	29903	NSP12b	Y23Y	SNP_silent	RNA-dependent RNA polymerase, post-ribosomal frameshift	NSP12b:Y23Y	C13536T
EPI_ISL_433868	13536	C	T	13536	29903	NSP12b	Y23Y	SNP_silent	RNA-dependent RNA polymerase, post-ribosomal frameshift	NSP12b:Y23Y	C13536T
EPI_ISL_433873	13536	C	T	13536	29903	NSP12b	Y23Y	SNP_silent	RNA-dependent RNA polymerase, post-ribosomal frameshift	NSP12b:Y23Y	C13536T
EPI_ISL_433881	13536	C	T	13536	29903	NSP12b	Y23Y	SNP_silent	RNA-dependent RNA polymerase, post-ribosomal frameshift	NSP12b:Y23Y	C13536T
EPI_ISL_433946	13536	C	T	13536	29903	NSP12b	Y23Y	SNP_silent	RNA-dependent RNA polymerase, post-ribosomal frameshift	NSP12b:Y23Y	C13536T
EPI_ISL_433988	13536	C	T	13536	29903	NSP12b	Y23Y	SNP_silent	RNA-dependent RNA polymerase, post-ribosomal frameshift	NSP12b:Y23Y	C13536T
EPI_ISL_434015	13536	C	T	13536	29903	NSP12b	Y23Y	SNP_silent	RNA-dependent RNA polymerase, post-ribosomal frameshift	NSP12b:Y23Y	C13536T
EPI_ISL_434028	13536	C	T	13536	29903	NSP12b	Y23Y	SNP_silent	RNA-dependent RNA polymerase, post-ribosomal frameshift	NSP12b:Y23Y	C13536T
EPI_ISL_434155	13536	C	T	13536	29903	NSP12b	Y23Y	SNP_silent	RNA-dependent RNA polymerase, post-ribosomal frameshift	NSP12b:Y23Y	C13536T
EPI_ISL_434538	13536	C	T	13508	29807	NSP12b	Y23Y	SNP_silent	RNA-dependent RNA polymerase, post-ribosomal frameshift	NSP12b:Y23Y	C13536T
EPI_ISL_434678	13536	C	T	13532	29899	NSP12b	Y23Y	SNP_silent	RNA-dependent RNA polymerase, post-ribosomal frameshift	NSP12b:Y23Y	C13536T
EPI_ISL_434679	13536	C	T	13532	29899	NSP12b	Y23Y	SNP_silent	RNA-dependent RNA polymerase, post-ribosomal frameshift	NSP12b:Y23Y	C13536T
EPI_ISL_435113	13536	C	T	13498	29800	NSP12b	Y23Y	SNP_silent	RNA-dependent RNA polymerase, post-ribosomal frameshift	NSP12b:Y23Y	C13536T
EPI_ISL_435114	13536	C	T	13498	29798	NSP12b	Y23Y	SNP_silent	RNA-dependent RNA polymerase, post-ribosomal frameshift	NSP12b:Y23Y	C13536T
EPI_ISL_435158	13536	C	T	13498	29741	NSP12b	Y23Y	SNP_silent	RNA-dependent RNA polymerase, post-ribosomal frameshift	NSP12b:Y23Y	C13536T
EPI_ISL_435161	13536	C	T	13498	29798	NSP12b	Y23Y	SNP_silent	RNA-dependent RNA polymerase, post-ribosomal frameshift	NSP12b:Y23Y	C13536T
EPI_ISL_435315	13536	C	T	13498	29824	NSP12b	Y23Y	SNP_silent	RNA-dependent RNA polymerase, post-ribosomal frameshift	NSP12b:Y23Y	C13536T
EPI_ISL_435382	13536	C	T	13490	29857	NSP12b	Y23Y	SNP_silent	RNA-dependent RNA polymerase, post-ribosomal frameshift	NSP12b:Y23Y	C13536T
EPI_ISL_435383	13536	C	T	13494	29861	NSP12b	Y23Y	SNP_silent	RNA-dependent RNA polymerase, post-ribosomal frameshift	NSP12b:Y23Y	C13536T
EPI_ISL_435413	13536	C	T	13536	29903	NSP12b	Y23Y	SNP_silent	RNA-dependent RNA polymerase, post-ribosomal frameshift	NSP12b:Y23Y	C13536T
EPI_ISL_436048	13536	C	T	13536	29882	NSP12b	Y23Y	SNP_silent	RNA-dependent RNA polymerase, post-ribosomal frameshift	NSP12b:Y23Y	C13536T
EPI_ISL_436686	13536	C	T	13536	29903	NSP12b	Y23Y	SNP_silent	RNA-dependent RNA polymerase, post-ribosomal frameshift	NSP12b:Y23Y	C13536T
EPI_ISL_436800	13536	C	T	13536	29903	NSP12b	Y23Y	SNP_silent	RNA-dependent RNA polymerase, post-ribosomal frameshift	NSP12b:Y23Y	C13536T
EPI_ISL_436909	13536	C	T	13497	29864	NSP12b	Y23Y	SNP_silent	RNA-dependent RNA polymerase, post-ribosomal frameshift	NSP12b:Y23Y	C13536T
EPI_ISL_436910	13536	C	T	13496	29863	NSP12b	Y23Y	SNP_silent	RNA-dependent RNA polymerase, post-ribosomal frameshift	NSP12b:Y23Y	C13536T
EPI_ISL_436937	13536	C	T	13534	29901	NSP12b	Y23Y	SNP_silent	RNA-dependent RNA polymerase, post-ribosomal frameshift	NSP12b:Y23Y	C13536T
EPI_ISL_437227	13536	C	T	13536	29903	NSP12b	Y23Y	SNP_silent	RNA-dependent RNA polymerase, post-ribosomal frameshift	NSP12b:Y23Y	C13536T
EPI_ISL_437296	13536	C	T	13536	29903	NSP12b	Y23Y	SNP_silent	RNA-dependent RNA polymerase, post-ribosomal frameshift	NSP12b:Y23Y	C13536T
EPI_ISL_437346	13536	C	T	13498	29800	NSP12b	Y23Y	SNP_silent	RNA-dependent RNA polymerase, post-ribosomal frameshift	NSP12b:Y23Y	C13536T
EPI_ISL_437663	13536	C	T	13536	29903	NSP12b	Y23Y	SNP_silent	RNA-dependent RNA polymerase, post-ribosomal frameshift	NSP12b:Y23Y	C13536T
EPI_ISL_437862	13536	C	T	13475	29803	NSP12b	Y23Y	SNP_silent	RNA-dependent RNA polymerase, post-ribosomal frameshift	NSP12b:Y23Y	C13536T
EPI_ISL_437879	13536	C	T	13511	29818	NSP12b	Y23Y	SNP_silent	RNA-dependent RNA polymerase, post-ribosomal frameshift	NSP12b:Y23Y	C13536T
EPI_ISL_437939	13536	C	T	13536	29866	NSP12b	Y23Y	SNP_silent	RNA-dependent RNA polymerase, post-ribosomal frameshift	NSP12b:Y23Y	C13536T
EPI_ISL_437970	13536	C	T	13536	29873	NSP12b	Y23Y	SNP_silent	RNA-dependent RNA polymerase, post-ribosomal frameshift	NSP12b:Y23Y	C13536T
EPI_ISL_438187	13536	C	T	13536	29903	NSP12b	Y23Y	SNP_silent	RNA-dependent RNA polymerase, post-ribosomal frameshift	NSP12b:Y23Y	C13536T
EPI_ISL_438290	13536	C	T	13482	29812	NSP12b	Y23Y	SNP_silent	RNA-dependent RNA polymerase, post-ribosomal frameshift	NSP12b:Y23Y	C13536T
EPI_ISL_438291	13536	C	T	13482	29782	NSP12b	Y23Y	SNP_silent	RNA-dependent RNA polymerase, post-ribosomal frameshift	NSP12b:Y23Y	C13536T
EPI_ISL_438323	13536	C	T	13482	29782	NSP12b	Y23Y	SNP_silent	RNA-dependent RNA polymerase, post-ribosomal frameshift	NSP12b:Y23Y	C13536T
EPI_ISL_438375	13536	C	T	13482	29782	NSP12b	Y23Y	SNP_silent	RNA-dependent RNA polymerase, post-ribosomal frameshift	NSP12b:Y23Y	C13536T
EPI_ISL_438388	13536	C	T	13482	29782	NSP12b	Y23Y	SNP_silent	RNA-dependent RNA polymerase, post-ribosomal frameshift	NSP12b:Y23Y	C13536T
EPI_ISL_438394	13536	C	T	13482	29782	NSP12b	Y23Y	SNP_silent	RNA-dependent RNA polymerase, post-ribosomal frameshift	NSP12b:Y23Y	C13536T
EPI_ISL_438401	13536	C	T	13482	29782	NSP12b	Y23Y	SNP_silent	RNA-dependent RNA polymerase, post-ribosomal frameshift	NSP12b:Y23Y	C13536T
EPI_ISL_438441	13536	C	T	13482	29812	NSP12b	Y23Y	SNP_silent	RNA-dependent RNA polymerase, post-ribosomal frameshift	NSP12b:Y23Y	C13536T
EPI_ISL_438448	13536	C	T	13482	29845	NSP12b	Y23Y	SNP_silent	RNA-dependent RNA polymerase, post-ribosomal frameshift	NSP12b:Y23Y	C13536T
EPI_ISL_438457	13536	C	T	13482	29782	NSP12b	Y23Y	SNP_silent	RNA-dependent RNA polymerase, post-ribosomal frameshift	NSP12b:Y23Y	C13536T
EPI_ISL_438522	13536	C	T	13482	29849	NSP12b	Y23Y	SNP_silent	RNA-dependent RNA polymerase, post-ribosomal frameshift	NSP12b:Y23Y	C13536T
EPI_ISL_438533	13536	C	T	13482	29849	NSP12b	Y23Y	SNP_silent	RNA-dependent RNA polymerase, post-ribosomal frameshift	NSP12b:Y23Y	C13536T
EPI_ISL_438561	13536	C	T	13536	29903	NSP12b	Y23Y	SNP_silent	RNA-dependent RNA polymerase, post-ribosomal frameshift	NSP12b:Y23Y	C13536T
EPI_ISL_438562	13536	C	T	13536	29903	NSP12b	Y23Y	SNP_silent	RNA-dependent RNA polymerase, post-ribosomal frameshift	NSP12b:Y23Y	C13536T
EPI_ISL_438565	13536	C	T	13536	29903	NSP12b	Y23Y	SNP_silent	RNA-dependent RNA polymerase, post-ribosomal frameshift	NSP12b:Y23Y	C13536T
EPI_ISL_438567	13536	C	T	13536	29903	NSP12b	Y23Y	SNP_silent	RNA-dependent RNA polymerase, post-ribosomal frameshift	NSP12b:Y23Y	C13536T
EPI_ISL_438609	13536	C	T	13536	29903	NSP12b	Y23Y	SNP_silent	RNA-dependent RNA polymerase, post-ribosomal frameshift	NSP12b:Y23Y	C13536T
EPI_ISL_438643	13536	C	T	13536	29903	NSP12b	Y23Y	SNP_silent	RNA-dependent RNA polymerase, post-ribosomal frameshift	NSP12b:Y23Y	C13536T
EPI_ISL_438659	13536	C	T	13536	29903	NSP12b	Y23Y	SNP_silent	RNA-dependent RNA polymerase, post-ribosomal frameshift	NSP12b:Y23Y	C13536T
EPI_ISL_438695	13536	C	T	13536	29903	NSP12b	Y23Y	SNP_silent	RNA-dependent RNA polymerase, post-ribosomal frameshift	NSP12b:Y23Y	C13536T
EPI_ISL_438703	13536	C	T	13536	29903	NSP12b	Y23Y	SNP_silent	RNA-dependent RNA polymerase, post-ribosomal frameshift	NSP12b:Y23Y	C13536T
EPI_ISL_438708	13536	C	T	13536	29903	NSP12b	Y23Y	SNP_silent	RNA-dependent RNA polymerase, post-ribosomal frameshift	NSP12b:Y23Y	C13536T
EPI_ISL_438745	13536	C	T	13536	29903	NSP12b	Y23Y	SNP_silent	RNA-dependent RNA polymerase, post-ribosomal frameshift	NSP12b:Y23Y	C13536T
EPI_ISL_438748	13536	C	T	13536	29903	NSP12b	Y23Y	SNP_silent	RNA-dependent RNA polymerase, post-ribosomal frameshift	NSP12b:Y23Y	C13536T
EPI_ISL_439379	13536	C	T	13482	29782	NSP12b	Y23Y	SNP_silent	RNA-dependent RNA polymerase, post-ribosomal frameshift	NSP12b:Y23Y	C13536T
EPI_ISL_439382	13536	C	T	13482	29782	NSP12b	Y23Y	SNP_silent	RNA-dependent RNA polymerase, post-ribosomal frameshift	NSP12b:Y23Y	C13536T
EPI_ISL_439501	13536	C	T	13482	29812	NSP12b	Y23Y	SNP_silent	RNA-dependent RNA polymerase, post-ribosomal frameshift	NSP12b:Y23Y	C13536T
EPI_ISL_439523	13536	C	T	13482	29849	NSP12b	Y23Y	SNP_silent	RNA-dependent RNA polymerase, post-ribosomal frameshift	NSP12b:Y23Y	C13536T
EPI_ISL_439530	13536	C	T	13482	29782	NSP12b	Y23Y	SNP_silent	RNA-dependent RNA polymerase, post-ribosomal frameshift	NSP12b:Y23Y	C13536T
EPI_ISL_439557	13536	C	T	13482	29782	NSP12b	Y23Y	SNP_silent	RNA-dependent RNA polymerase, post-ribosomal frameshift	NSP12b:Y23Y	C13536T
EPI_ISL_439567	13536	C	T	13534	29864	NSP12b	Y23Y	SNP_silent	RNA-dependent RNA polymerase, post-ribosomal frameshift	NSP12b:Y23Y	C13536T
EPI_ISL_439585	13536	C	T	13482	29782	NSP12b	Y23Y	SNP_silent	RNA-dependent RNA polymerase, post-ribosomal frameshift	NSP12b:Y23Y	C13536T
EPI_ISL_439615	13536	C	T	13536	29866	NSP12b	Y23Y	SNP_silent	RNA-dependent RNA polymerase, post-ribosomal frameshift	NSP12b:Y23Y	C13536T
EPI_ISL_439647	13536	C	T	13482	29849	NSP12b	Y23Y	SNP_silent	RNA-dependent RNA polymerase, post-ribosomal frameshift	NSP12b:Y23Y	C13536T
EPI_ISL_439650	13536	C	T	13482	29782	NSP12b	Y23Y	SNP_silent	RNA-dependent RNA polymerase, post-ribosomal frameshift	NSP12b:Y23Y	C13536T
EPI_ISL_439933	13536	C	T	13482	29849	NSP12b	Y23Y	SNP_silent	RNA-dependent RNA polymerase, post-ribosomal frameshift	NSP12b:Y23Y	C13536T
EPI_ISL_439969	13536	C	T	13482	29804	NSP12b	Y23Y	SNP_silent	RNA-dependent RNA polymerase, post-ribosomal frameshift	NSP12b:Y23Y	C13536T
EPI_ISL_440015	13536	C	T	13482	29782	NSP12b	Y23Y	SNP_silent	RNA-dependent RNA polymerase, post-ribosomal frameshift	NSP12b:Y23Y	C13536T
EPI_ISL_440064	13536	C	T	13482	29795	NSP12b	Y23Y	SNP_silent	RNA-dependent RNA polymerase, post-ribosomal frameshift	NSP12b:Y23Y	C13536T
EPI_ISL_440208	13536	C	T	13482	29782	NSP12b	Y23Y	SNP_silent	RNA-dependent RNA polymerase, post-ribosomal frameshift	NSP12b:Y23Y	C13536T
EPI_ISL_440222	13536	C	T	13482	29782	NSP12b	Y23Y	SNP_silent	RNA-dependent RNA polymerase, post-ribosomal frameshift	NSP12b:Y23Y	C13536T
EPI_ISL_440355	13536	C	T	13482	29812	NSP12b	Y23Y	SNP_silent	RNA-dependent RNA polymerase, post-ribosomal frameshift	NSP12b:Y23Y	C13536T
EPI_ISL_440372	13536	C	T	13482	29782	NSP12b	Y23Y	SNP_silent	RNA-dependent RNA polymerase, post-ribosomal frameshift	NSP12b:Y23Y	C13536T
EPI_ISL_440377	13536	C	T	13482	29812	NSP12b	Y23Y	SNP_silent	RNA-dependent RNA polymerase, post-ribosomal frameshift	NSP12b:Y23Y	C13536T
EPI_ISL_440388	13536	C	T	13482	29782	NSP12b	Y23Y	SNP_silent	RNA-dependent RNA polymerase, post-ribosomal frameshift	NSP12b:Y23Y	C13536T
EPI_ISL_440413	13536	C	T	13482	29782	NSP12b	Y23Y	SNP_silent	RNA-dependent RNA polymerase, post-ribosomal frameshift	NSP12b:Y23Y	C13536T
EPI_ISL_440446	13536	C	T	13536	29903	NSP12b	Y23Y	SNP_silent	RNA-dependent RNA polymerase, post-ribosomal frameshift	NSP12b:Y23Y	C13536T
EPI_ISL_440450	13536	C	T	13536	29903	NSP12b	Y23Y	SNP_silent	RNA-dependent RNA polymerase, post-ribosomal frameshift	NSP12b:Y23Y	C13536T
EPI_ISL_440522	13536	C	T	13482	29812	NSP12b	Y23Y	SNP_silent	RNA-dependent RNA polymerase, post-ribosomal frameshift	NSP12b:Y23Y	C13536T
EPI_ISL_440525	13536	C	T	13482	29812	NSP12b	Y23Y	SNP_silent	RNA-dependent RNA polymerase, post-ribosomal frameshift	NSP12b:Y23Y	C13536T
EPI_ISL_440590	13536	C	T	13482	29812	NSP12b	Y23Y	SNP_silent	RNA-dependent RNA polymerase, post-ribosomal frameshift	NSP12b:Y23Y	C13536T
EPI_ISL_440593	13536	C	T	13482	29813	NSP12b	Y23Y	SNP_silent	RNA-dependent RNA polymerase, post-ribosomal frameshift	NSP12b:Y23Y	C13536T
EPI_ISL_440642	13536	C	T	13482	29812	NSP12b	Y23Y	SNP_silent	RNA-dependent RNA polymerase, post-ribosomal frameshift	NSP12b:Y23Y	C13536T
EPI_ISL_440720	13536	C	T	13482	29782	NSP12b	Y23Y	SNP_silent	RNA-dependent RNA polymerase, post-ribosomal frameshift	NSP12b:Y23Y	C13536T
EPI_ISL_440727	13536	C	T	13482	29782	NSP12b	Y23Y	SNP_silent	RNA-dependent RNA polymerase, post-ribosomal frameshift	NSP12b:Y23Y	C13536T
EPI_ISL_440817	13536	C	T	13482	29849	NSP12b	Y23Y	SNP_silent	RNA-dependent RNA polymerase, post-ribosomal frameshift	NSP12b:Y23Y	C13536T
EPI_ISL_440952	13536	C	T	13536	29903	NSP12b	Y23Y	SNP_silent	RNA-dependent RNA polymerase, post-ribosomal frameshift	NSP12b:Y23Y	C13536T
EPI_ISL_440961	13536	C	T	13536	29903	NSP12b	Y23Y	SNP_silent	RNA-dependent RNA polymerase, post-ribosomal frameshift	NSP12b:Y23Y	C13536T
EPI_ISL_440977	13536	C	T	13536	29891	NSP12b	Y23Y	SNP_silent	RNA-dependent RNA polymerase, post-ribosomal frameshift	NSP12b:Y23Y	C13536T
EPI_ISL_440980	13536	C	T	13536	29903	NSP12b	Y23Y	SNP_silent	RNA-dependent RNA polymerase, post-ribosomal frameshift	NSP12b:Y23Y	C13536T
EPI_ISL_441086	13536	C	T	13482	29782	NSP12b	Y23Y	SNP_silent	RNA-dependent RNA polymerase, post-ribosomal frameshift	NSP12b:Y23Y	C13536T
EPI_ISL_441109	13536	C	T	13482	29782	NSP12b	Y23Y	SNP_silent	RNA-dependent RNA polymerase, post-ribosomal frameshift	NSP12b:Y23Y	C13536T
EPI_ISL_441137	13536	C	T	13482	29782	NSP12b	Y23Y	SNP_silent	RNA-dependent RNA polymerase, post-ribosomal frameshift	NSP12b:Y23Y	C13536T
EPI_ISL_441152	13536	C	T	13482	29782	NSP12b	Y23Y	SNP_silent	RNA-dependent RNA polymerase, post-ribosomal frameshift	NSP12b:Y23Y	C13536T
EPI_ISL_441190	13536	C	T	13482	29782	NSP12b	Y23Y	SNP_silent	RNA-dependent RNA polymerase, post-ribosomal frameshift	NSP12b:Y23Y	C13536T
EPI_ISL_441196	13536	C	T	13482	29782	NSP12b	Y23Y	SNP_silent	RNA-dependent RNA polymerase, post-ribosomal frameshift	NSP12b:Y23Y	C13536T
EPI_ISL_441245	13536	C	T	13482	29844	NSP12b	Y23Y	SNP_silent	RNA-dependent RNA polymerase, post-ribosomal frameshift	NSP12b:Y23Y	C13536T
EPI_ISL_441312	13536	C	T	13482	29812	NSP12b	Y23Y	SNP_silent	RNA-dependent RNA polymerase, post-ribosomal frameshift	NSP12b:Y23Y	C13536T
EPI_ISL_441313	13536	C	T	13482	29812	NSP12b	Y23Y	SNP_silent	RNA-dependent RNA polymerase, post-ribosomal frameshift	NSP12b:Y23Y	C13536T
EPI_ISL_441323	13536	C	T	13482	29849	NSP12b	Y23Y	SNP_silent	RNA-dependent RNA polymerase, post-ribosomal frameshift	NSP12b:Y23Y	C13536T
EPI_ISL_441412	13536	C	T	13507	29874	NSP12b	Y23Y	SNP_silent	RNA-dependent RNA polymerase, post-ribosomal frameshift	NSP12b:Y23Y	C13536T
EPI_ISL_441459	13536	C	T	13536	29903	NSP12b	Y23Y	SNP_silent	RNA-dependent RNA polymerase, post-ribosomal frameshift	NSP12b:Y23Y	C13536T
EPI_ISL_441489	13536	C	T	13536	29903	NSP12b	Y23Y	SNP_silent	RNA-dependent RNA polymerase, post-ribosomal frameshift	NSP12b:Y23Y	C13536T
EPI_ISL_441515	13536	C	T	13536	29903	NSP12b	Y23Y	SNP_silent	RNA-dependent RNA polymerase, post-ribosomal frameshift	NSP12b:Y23Y	C13536T
EPI_ISL_441517	13536	C	T	13536	29903	NSP12b	Y23Y	SNP_silent	RNA-dependent RNA polymerase, post-ribosomal frameshift	NSP12b:Y23Y	C13536T
EPI_ISL_441518	13536	C	T	13536	29903	NSP12b	Y23Y	SNP_silent	RNA-dependent RNA polymerase, post-ribosomal frameshift	NSP12b:Y23Y	C13536T
EPI_ISL_441519	13536	C	T	13536	29903	NSP12b	Y23Y	SNP_silent	RNA-dependent RNA polymerase, post-ribosomal frameshift	NSP12b:Y23Y	C13536T
EPI_ISL_441520	13536	C	T	13536	29903	NSP12b	Y23Y	SNP_silent	RNA-dependent RNA polymerase, post-ribosomal frameshift	NSP12b:Y23Y	C13536T
EPI_ISL_441524	13536	C	T	13536	29903	NSP12b	Y23Y	SNP_silent	RNA-dependent RNA polymerase, post-ribosomal frameshift	NSP12b:Y23Y	C13536T
EPI_ISL_441526	13536	C	T	13536	29903	NSP12b	Y23Y	SNP_silent	RNA-dependent RNA polymerase, post-ribosomal frameshift	NSP12b:Y23Y	C13536T
EPI_ISL_441528	13536	C	T	13536	29903	NSP12b	Y23Y	SNP_silent	RNA-dependent RNA polymerase, post-ribosomal frameshift	NSP12b:Y23Y	C13536T
EPI_ISL_441535	13536	C	T	13536	29903	NSP12b	Y23Y	SNP_silent	RNA-dependent RNA polymerase, post-ribosomal frameshift	NSP12b:Y23Y	C13536T
EPI_ISL_441542	13536	C	T	13536	29903	NSP12b	Y23Y	SNP_silent	RNA-dependent RNA polymerase, post-ribosomal frameshift	NSP12b:Y23Y	C13536T
EPI_ISL_441553	13536	C	T	13482	29782	NSP12b	Y23Y	SNP_silent	RNA-dependent RNA polymerase, post-ribosomal frameshift	NSP12b:Y23Y	C13536T
EPI_ISL_441595	13536	C	T	13482	29782	NSP12b	Y23Y	SNP_silent	RNA-dependent RNA polymerase, post-ribosomal frameshift	NSP12b:Y23Y	C13536T
EPI_ISL_441605	13536	C	T	13482	29782	NSP12b	Y23Y	SNP_silent	RNA-dependent RNA polymerase, post-ribosomal frameshift	NSP12b:Y23Y	C13536T
EPI_ISL_441624	13536	C	T	13482	29849	NSP12b	Y23Y	SNP_silent	RNA-dependent RNA polymerase, post-ribosomal frameshift	NSP12b:Y23Y	C13536T
EPI_ISL_441634	13536	C	T	13482	29835	NSP12b	Y23Y	SNP_silent	RNA-dependent RNA polymerase, post-ribosomal frameshift	NSP12b:Y23Y	C13536T
EPI_ISL_441651	13536	C	T	13482	29849	NSP12b	Y23Y	SNP_silent	RNA-dependent RNA polymerase, post-ribosomal frameshift	NSP12b:Y23Y	C13536T
EPI_ISL_441669	13536	C	T	13482	29812	NSP12b	Y23Y	SNP_silent	RNA-dependent RNA polymerase, post-ribosomal frameshift	NSP12b:Y23Y	C13536T
EPI_ISL_441681	13536	C	T	13532	29833	NSP12b	Y23Y	SNP_silent	RNA-dependent RNA polymerase, post-ribosomal frameshift	NSP12b:Y23Y	C13536T
EPI_ISL_441807	13536	C	T	13482	29778	NSP12b	Y23Y	SNP_silent	RNA-dependent RNA polymerase, post-ribosomal frameshift	NSP12b:Y23Y	C13536T
EPI_ISL_441817	13536	C	T	13482	29812	NSP12b	Y23Y	SNP_silent	RNA-dependent RNA polymerase, post-ribosomal frameshift	NSP12b:Y23Y	C13536T
EPI_ISL_441845	13536	C	T	13482	29782	NSP12b	Y23Y	SNP_silent	RNA-dependent RNA polymerase, post-ribosomal frameshift	NSP12b:Y23Y	C13536T
EPI_ISL_441857	13536	C	T	13536	29903	NSP12b	Y23Y	SNP_silent	RNA-dependent RNA polymerase, post-ribosomal frameshift	NSP12b:Y23Y	C13536T
EPI_ISL_441861	13536	C	T	13536	29903	NSP12b	Y23Y	SNP_silent	RNA-dependent RNA polymerase, post-ribosomal frameshift	NSP12b:Y23Y	C13536T
EPI_ISL_441865	13536	C	T	13536	29903	NSP12b	Y23Y	SNP_silent	RNA-dependent RNA polymerase, post-ribosomal frameshift	NSP12b:Y23Y	C13536T
EPI_ISL_441867	13536	C	T	13536	29903	NSP12b	Y23Y	SNP_silent	RNA-dependent RNA polymerase, post-ribosomal frameshift	NSP12b:Y23Y	C13536T
EPI_ISL_441870	13536	C	T	13536	29903	NSP12b	Y23Y	SNP_silent	RNA-dependent RNA polymerase, post-ribosomal frameshift	NSP12b:Y23Y	C13536T
EPI_ISL_441886	13536	C	T	13536	29903	NSP12b	Y23Y	SNP_silent	RNA-dependent RNA polymerase, post-ribosomal frameshift	NSP12b:Y23Y	C13536T
EPI_ISL_441890	13536	C	T	13536	29903	NSP12b	Y23Y	SNP_silent	RNA-dependent RNA polymerase, post-ribosomal frameshift	NSP12b:Y23Y	C13536T
EPI_ISL_441894	13536	C	T	13536	29903	NSP12b	Y23Y	SNP_silent	RNA-dependent RNA polymerase, post-ribosomal frameshift	NSP12b:Y23Y	C13536T
EPI_ISL_441896	13536	C	T	13536	29903	NSP12b	Y23Y	SNP_silent	RNA-dependent RNA polymerase, post-ribosomal frameshift	NSP12b:Y23Y	C13536T
EPI_ISL_441936	13536	C	T	13536	29903	NSP12b	Y23Y	SNP_silent	RNA-dependent RNA polymerase, post-ribosomal frameshift	NSP12b:Y23Y	C13536T
EPI_ISL_441946	13536	C	T	13536	29903	NSP12b	Y23Y	SNP_silent	RNA-dependent RNA polymerase, post-ribosomal frameshift	NSP12b:Y23Y	C13536T
EPI_ISL_441949	13536	C	T	13536	29903	NSP12b	Y23Y	SNP_silent	RNA-dependent RNA polymerase, post-ribosomal frameshift	NSP12b:Y23Y	C13536T
EPI_ISL_441998	13536	C	T	13536	29903	NSP12b	Y23Y	SNP_silent	RNA-dependent RNA polymerase, post-ribosomal frameshift	NSP12b:Y23Y	C13536T
EPI_ISL_442032	13536	C	T	13536	29903	NSP12b	Y23Y	SNP_silent	RNA-dependent RNA polymerase, post-ribosomal frameshift	NSP12b:Y23Y	C13536T
EPI_ISL_442042	13536	C	T	13536	29903	NSP12b	Y23Y	SNP_silent	RNA-dependent RNA polymerase, post-ribosomal frameshift	NSP12b:Y23Y	C13536T
EPI_ISL_442080	13536	C	T	13482	29812	NSP12b	Y23Y	SNP_silent	RNA-dependent RNA polymerase, post-ribosomal frameshift	NSP12b:Y23Y	C13536T
EPI_ISL_442158	13536	C	T	13482	29849	NSP12b	Y23Y	SNP_silent	RNA-dependent RNA polymerase, post-ribosomal frameshift	NSP12b:Y23Y	C13536T
EPI_ISL_442185	13536	C	T	13482	29849	NSP12b	Y23Y	SNP_silent	RNA-dependent RNA polymerase, post-ribosomal frameshift	NSP12b:Y23Y	C13536T
EPI_ISL_442219	13536	C	T	13482	29782	NSP12b	Y23Y	SNP_silent	RNA-dependent RNA polymerase, post-ribosomal frameshift	NSP12b:Y23Y	C13536T
EPI_ISL_442238	13536	C	T	13482	29812	NSP12b	Y23Y	SNP_silent	RNA-dependent RNA polymerase, post-ribosomal frameshift	NSP12b:Y23Y	C13536T
EPI_ISL_442317	13536	C	T	13482	29849	NSP12b	Y23Y	SNP_silent	RNA-dependent RNA polymerase, post-ribosomal frameshift	NSP12b:Y23Y	C13536T
EPI_ISL_442319	13536	C	T	13482	29819	NSP12b	Y23Y	SNP_silent	RNA-dependent RNA polymerase, post-ribosomal frameshift	NSP12b:Y23Y	C13536T
EPI_ISL_442355	13536	C	T	13536	29903	NSP12b	Y23Y	SNP_silent	RNA-dependent RNA polymerase, post-ribosomal frameshift	NSP12b:Y23Y	C13536T
EPI_ISL_442359	13536	C	T	13536	29903	NSP12b	Y23Y	SNP_silent	RNA-dependent RNA polymerase, post-ribosomal frameshift	NSP12b:Y23Y	C13536T
EPI_ISL_442360	13536	C	T	13536	29903	NSP12b	Y23Y	SNP_silent	RNA-dependent RNA polymerase, post-ribosomal frameshift	NSP12b:Y23Y	C13536T
EPI_ISL_442384	13536	C	T	13536	29903	NSP12b	Y23Y	SNP_silent	RNA-dependent RNA polymerase, post-ribosomal frameshift	NSP12b:Y23Y	C13536T
EPI_ISL_442461	13536	C	T	13536	29903	NSP12b	Y23Y	SNP_silent	RNA-dependent RNA polymerase, post-ribosomal frameshift	NSP12b:Y23Y	C13536T
EPI_ISL_442508	13536	C	T	13536	29903	NSP12b	Y23Y	SNP_silent	RNA-dependent RNA polymerase, post-ribosomal frameshift	NSP12b:Y23Y	C13536T
EPI_ISL_442522	13536	C	T	13536	29903	NSP12b	Y23Y	SNP_silent	RNA-dependent RNA polymerase, post-ribosomal frameshift	NSP12b:Y23Y	C13536T
EPI_ISL_442545	13536	C	T	13482	29782	NSP12b	Y23Y	SNP_silent	RNA-dependent RNA polymerase, post-ribosomal frameshift	NSP12b:Y23Y	C13536T
EPI_ISL_442596	13536	C	T	13482	29846	NSP12b	Y23Y	SNP_silent	RNA-dependent RNA polymerase, post-ribosomal frameshift	NSP12b:Y23Y	C13536T
EPI_ISL_442607	13536	C	T	13482	29782	NSP12b	Y23Y	SNP_silent	RNA-dependent RNA polymerase, post-ribosomal frameshift	NSP12b:Y23Y	C13536T
EPI_ISL_442620	13536	C	T	13482	29812	NSP12b	Y23Y	SNP_silent	RNA-dependent RNA polymerase, post-ribosomal frameshift	NSP12b:Y23Y	C13536T
EPI_ISL_442820	13536	C	T	13482	29782	NSP12b	Y23Y	SNP_silent	RNA-dependent RNA polymerase, post-ribosomal frameshift	NSP12b:Y23Y	C13536T
EPI_ISL_442846	13536	C	T	13482	29849	NSP12b	Y23Y	SNP_silent	RNA-dependent RNA polymerase, post-ribosomal frameshift	NSP12b:Y23Y	C13536T
EPI_ISL_442850	13536	C	T	13482	29849	NSP12b	Y23Y	SNP_silent	RNA-dependent RNA polymerase, post-ribosomal frameshift	NSP12b:Y23Y	C13536T
EPI_ISL_442917	13536	C	T	13482	29849	NSP12b	Y23Y	SNP_silent	RNA-dependent RNA polymerase, post-ribosomal frameshift	NSP12b:Y23Y	C13536T
EPI_ISL_442947	13536	C	T	13482	29846	NSP12b	Y23Y	SNP_silent	RNA-dependent RNA polymerase, post-ribosomal frameshift	NSP12b:Y23Y	C13536T
EPI_ISL_442948	13536	C	T	13482	29849	NSP12b	Y23Y	SNP_silent	RNA-dependent RNA polymerase, post-ribosomal frameshift	NSP12b:Y23Y	C13536T
EPI_ISL_442952	13536	C	T	13482	29849	NSP12b	Y23Y	SNP_silent	RNA-dependent RNA polymerase, post-ribosomal frameshift	NSP12b:Y23Y	C13536T
EPI_ISL_442975	13536	C	T	13482	29849	NSP12b	Y23Y	SNP_silent	RNA-dependent RNA polymerase, post-ribosomal frameshift	NSP12b:Y23Y	C13536T
EPI_ISL_442988	13536	C	T	13482	29849	NSP12b	Y23Y	SNP_silent	RNA-dependent RNA polymerase, post-ribosomal frameshift	NSP12b:Y23Y	C13536T
EPI_ISL_443009	13536	C	T	13482	29782	NSP12b	Y23Y	SNP_silent	RNA-dependent RNA polymerase, post-ribosomal frameshift	NSP12b:Y23Y	C13536T
EPI_ISL_443013	13536	C	T	13482	29782	NSP12b	Y23Y	SNP_silent	RNA-dependent RNA polymerase, post-ribosomal frameshift	NSP12b:Y23Y	C13536T
EPI_ISL_443043	13536	C	T	13482	29849	NSP12b	Y23Y	SNP_silent	RNA-dependent RNA polymerase, post-ribosomal frameshift	NSP12b:Y23Y	C13536T
EPI_ISL_443062	13536	C	T	13482	29782	NSP12b	Y23Y	SNP_silent	RNA-dependent RNA polymerase, post-ribosomal frameshift	NSP12b:Y23Y	C13536T
EPI_ISL_443091	13536	C	T	13482	29849	NSP12b	Y23Y	SNP_silent	RNA-dependent RNA polymerase, post-ribosomal frameshift	NSP12b:Y23Y	C13536T
EPI_ISL_443099	13536	C	T	13482	29849	NSP12b	Y23Y	SNP_silent	RNA-dependent RNA polymerase, post-ribosomal frameshift	NSP12b:Y23Y	C13536T
EPI_ISL_443105	13536	C	T	13482	29849	NSP12b	Y23Y	SNP_silent	RNA-dependent RNA polymerase, post-ribosomal frameshift	NSP12b:Y23Y	C13536T
EPI_ISL_443109	13536	C	T	13482	29782	NSP12b	Y23Y	SNP_silent	RNA-dependent RNA polymerase, post-ribosomal frameshift	NSP12b:Y23Y	C13536T
EPI_ISL_443400	13536	C	T	13482	29833	NSP12b	Y23Y	SNP_silent	RNA-dependent RNA polymerase, post-ribosomal frameshift	NSP12b:Y23Y	C13536T
EPI_ISL_443404	13536	C	T	13482	29782	NSP12b	Y23Y	SNP_silent	RNA-dependent RNA polymerase, post-ribosomal frameshift	NSP12b:Y23Y	C13536T
EPI_ISL_443446	13536	C	T	13482	29782	NSP12b	Y23Y	SNP_silent	RNA-dependent RNA polymerase, post-ribosomal frameshift	NSP12b:Y23Y	C13536T
EPI_ISL_443451	13536	C	T	13482	29782	NSP12b	Y23Y	SNP_silent	RNA-dependent RNA polymerase, post-ribosomal frameshift	NSP12b:Y23Y	C13536T
EPI_ISL_443452	13536	C	T	13482	29812	NSP12b	Y23Y	SNP_silent	RNA-dependent RNA polymerase, post-ribosomal frameshift	NSP12b:Y23Y	C13536T
EPI_ISL_443468	13536	C	T	13482	29849	NSP12b	Y23Y	SNP_silent	RNA-dependent RNA polymerase, post-ribosomal frameshift	NSP12b:Y23Y	C13536T
EPI_ISL_443471	13536	C	T	13482	29849	NSP12b	Y23Y	SNP_silent	RNA-dependent RNA polymerase, post-ribosomal frameshift	NSP12b:Y23Y	C13536T
EPI_ISL_443504	13536	C	T	13482	29812	NSP12b	Y23Y	SNP_silent	RNA-dependent RNA polymerase, post-ribosomal frameshift	NSP12b:Y23Y	C13536T
EPI_ISL_443564	13536	C	T	13482	29784	NSP12b	Y23Y	SNP_silent	RNA-dependent RNA polymerase, post-ribosomal frameshift	NSP12b:Y23Y	C13536T
EPI_ISL_443576	13536	C	T	13532	29832	NSP12b	Y23Y	SNP_silent	RNA-dependent RNA polymerase, post-ribosomal frameshift	NSP12b:Y23Y	C13536T
EPI_ISL_443600	13536	C	T	13482	29782	NSP12b	Y23Y	SNP_silent	RNA-dependent RNA polymerase, post-ribosomal frameshift	NSP12b:Y23Y	C13536T
EPI_ISL_443602	13536	C	T	13482	29782	NSP12b	Y23Y	SNP_silent	RNA-dependent RNA polymerase, post-ribosomal frameshift	NSP12b:Y23Y	C13536T
EPI_ISL_443643	13536	C	T	13482	29782	NSP12b	Y23Y	SNP_silent	RNA-dependent RNA polymerase, post-ribosomal frameshift	NSP12b:Y23Y	C13536T
EPI_ISL_443663	13536	C	T	13482	29782	NSP12b	Y23Y	SNP_silent	RNA-dependent RNA polymerase, post-ribosomal frameshift	NSP12b:Y23Y	C13536T
EPI_ISL_443676	13536	C	T	13482	29849	NSP12b	Y23Y	SNP_silent	RNA-dependent RNA polymerase, post-ribosomal frameshift	NSP12b:Y23Y	C13536T
EPI_ISL_443684	13536	C	T	13482	29849	NSP12b	Y23Y	SNP_silent	RNA-dependent RNA polymerase, post-ribosomal frameshift	NSP12b:Y23Y	C13536T
EPI_ISL_443734	13536	C	T	13482	29849	NSP12b	Y23Y	SNP_silent	RNA-dependent RNA polymerase, post-ribosomal frameshift	NSP12b:Y23Y	C13536T
EPI_ISL_444016	13536	C	T	13482	29782	NSP12b	Y23Y	SNP_silent	RNA-dependent RNA polymerase, post-ribosomal frameshift	NSP12b:Y23Y	C13536T
EPI_ISL_444172	13536	C	T	13536	29903	NSP12b	Y23Y	SNP_silent	RNA-dependent RNA polymerase, post-ribosomal frameshift	NSP12b:Y23Y	C13536T
EPI_ISL_444173	13536	C	T	13536	29903	NSP12b	Y23Y	SNP_silent	RNA-dependent RNA polymerase, post-ribosomal frameshift	NSP12b:Y23Y	C13536T
EPI_ISL_444206	13536	C	T	13536	29903	NSP12b	Y23Y	SNP_silent	RNA-dependent RNA polymerase, post-ribosomal frameshift	NSP12b:Y23Y	C13536T
EPI_ISL_444220	13536	C	T	13536	29903	NSP12b	Y23Y	SNP_silent	RNA-dependent RNA polymerase, post-ribosomal frameshift	NSP12b:Y23Y	C13536T
EPI_ISL_444337	13536	C	T	13536	29903	NSP12b	Y23Y	SNP_silent	RNA-dependent RNA polymerase, post-ribosomal frameshift	NSP12b:Y23Y	C13536T
EPI_ISL_444360	13536	C	T	13536	29903	NSP12b	Y23Y	SNP_silent	RNA-dependent RNA polymerase, post-ribosomal frameshift	NSP12b:Y23Y	C13536T
EPI_ISL_444363	13536	C	T	13536	29903	NSP12b	Y23Y	SNP_silent	RNA-dependent RNA polymerase, post-ribosomal frameshift	NSP12b:Y23Y	C13536T
EPI_ISL_444368	13536	C	T	13536	29903	NSP12b	Y23Y	SNP_silent	RNA-dependent RNA polymerase, post-ribosomal frameshift	NSP12b:Y23Y	C13536T
EPI_ISL_444371	13536	C	T	13536	29903	NSP12b	Y23Y	SNP_silent	RNA-dependent RNA polymerase, post-ribosomal frameshift	NSP12b:Y23Y	C13536T
EPI_ISL_444377	13536	C	T	13536	29903	NSP12b	Y23Y	SNP_silent	RNA-dependent RNA polymerase, post-ribosomal frameshift	NSP12b:Y23Y	C13536T
EPI_ISL_444385	13536	C	T	13536	29903	NSP12b	Y23Y	SNP_silent	RNA-dependent RNA polymerase, post-ribosomal frameshift	NSP12b:Y23Y	C13536T
EPI_ISL_444390	13536	C	T	13536	29903	NSP12b	Y23Y	SNP_silent	RNA-dependent RNA polymerase, post-ribosomal frameshift	NSP12b:Y23Y	C13536T
EPI_ISL_444417	13536	C	T	13536	29903	NSP12b	Y23Y	SNP_silent	RNA-dependent RNA polymerase, post-ribosomal frameshift	NSP12b:Y23Y	C13536T
EPI_ISL_444426	13536	C	T	13536	29903	NSP12b	Y23Y	SNP_silent	RNA-dependent RNA polymerase, post-ribosomal frameshift	NSP12b:Y23Y	C13536T
EPI_ISL_444452	13536	C	T	13527	29894	NSP12b	Y23Y	SNP_silent	RNA-dependent RNA polymerase, post-ribosomal frameshift	NSP12b:Y23Y	C13536T
EPI_ISL_444476	13536	C	T	13536	29903	NSP12b	Y23Y	SNP_silent	RNA-dependent RNA polymerase, post-ribosomal frameshift	NSP12b:Y23Y	C13536T
EPI_ISL_445350	13536	C	T	13520	29844	NSP12b	Y23Y	SNP_silent	RNA-dependent RNA polymerase, post-ribosomal frameshift	NSP12b:Y23Y	C13536T
EPI_ISL_445374	13536	C	T	13537	29855	NSP12b	Y23Y	SNP_silent	RNA-dependent RNA polymerase, post-ribosomal frameshift	NSP12b:Y23Y	C13536T
EPI_ISL_445375	13536	C	T	13489	29791	NSP12b	Y23Y	SNP_silent	RNA-dependent RNA polymerase, post-ribosomal frameshift	NSP12b:Y23Y	C13536T
EPI_ISL_445465	13536	C	T	13532	29899	NSP12b	Y23Y	SNP_silent	RNA-dependent RNA polymerase, post-ribosomal frameshift	NSP12b:Y23Y	C13536T
EPI_ISL_445468	13536	C	T	13536	29903	NSP12b	Y23Y	SNP_silent	RNA-dependent RNA polymerase, post-ribosomal frameshift	NSP12b:Y23Y	C13536T
EPI_ISL_445761	13536	C	T	13536	29903	NSP12b	Y23Y	SNP_silent	RNA-dependent RNA polymerase, post-ribosomal frameshift	NSP12b:Y23Y	C13536T
EPI_ISL_446394	13536	C	T	13498	29865	NSP12b	Y23Y	SNP_silent	RNA-dependent RNA polymerase, post-ribosomal frameshift	NSP12b:Y23Y	C13536T
EPI_ISL_446493	13536	C	T	13525	29892	NSP12b	Y23Y	SNP_silent	RNA-dependent RNA polymerase, post-ribosomal frameshift	NSP12b:Y23Y	C13536T
EPI_ISL_447953	13536	C	T	13536	29903	NSP12b	Y23Y	SNP_silent	RNA-dependent RNA polymerase, post-ribosomal frameshift	NSP12b:Y23Y	C13536T
EPI_ISL_447954	13536	C	T	13536	29903	NSP12b	Y23Y	SNP_silent	RNA-dependent RNA polymerase, post-ribosomal frameshift	NSP12b:Y23Y	C13536T
EPI_ISL_447960	13536	C	T	13536	29903	NSP12b	Y23Y	SNP_silent	RNA-dependent RNA polymerase, post-ribosomal frameshift	NSP12b:Y23Y	C13536T
EPI_ISL_447973	13536	C	T	13536	29903	NSP12b	Y23Y	SNP_silent	RNA-dependent RNA polymerase, post-ribosomal frameshift	NSP12b:Y23Y	C13536T
EPI_ISL_447978	13536	C	T	13536	29903	NSP12b	Y23Y	SNP_silent	RNA-dependent RNA polymerase, post-ribosomal frameshift	NSP12b:Y23Y	C13536T
EPI_ISL_448004	13536	C	T	13536	29903	NSP12b	Y23Y	SNP_silent	RNA-dependent RNA polymerase, post-ribosomal frameshift	NSP12b:Y23Y	C13536T
EPI_ISL_448014	13536	C	T	13536	29903	NSP12b	Y23Y	SNP_silent	RNA-dependent RNA polymerase, post-ribosomal frameshift	NSP12b:Y23Y	C13536T
EPI_ISL_448024	13536	C	T	13536	29903	NSP12b	Y23Y	SNP_silent	RNA-dependent RNA polymerase, post-ribosomal frameshift	NSP12b:Y23Y	C13536T
EPI_ISL_448047	13536	C	T	13536	29903	NSP12b	Y23Y	SNP_silent	RNA-dependent RNA polymerase, post-ribosomal frameshift	NSP12b:Y23Y	C13536T
EPI_ISL_448062	13536	C	T	13536	29903	NSP12b	Y23Y	SNP_silent	RNA-dependent RNA polymerase, post-ribosomal frameshift	NSP12b:Y23Y	C13536T
EPI_ISL_448075	13536	C	T	13536	29903	NSP12b	Y23Y	SNP_silent	RNA-dependent RNA polymerase, post-ribosomal frameshift	NSP12b:Y23Y	C13536T
EPI_ISL_448100	13536	C	T	13536	29903	NSP12b	Y23Y	SNP_silent	RNA-dependent RNA polymerase, post-ribosomal frameshift	NSP12b:Y23Y	C13536T
EPI_ISL_448106	13536	C	T	13536	29903	NSP12b	Y23Y	SNP_silent	RNA-dependent RNA polymerase, post-ribosomal frameshift	NSP12b:Y23Y	C13536T
EPI_ISL_448389	13536	C	T	13536	29903	NSP12b	Y23Y	SNP_silent	RNA-dependent RNA polymerase, post-ribosomal frameshift	NSP12b:Y23Y	C13536T
EPI_ISL_448393	13536	C	T	13536	29903	NSP12b	Y23Y	SNP_silent	RNA-dependent RNA polymerase, post-ribosomal frameshift	NSP12b:Y23Y	C13536T
EPI_ISL_448399	13536	C	T	13536	29903	NSP12b	Y23Y	SNP_silent	RNA-dependent RNA polymerase, post-ribosomal frameshift	NSP12b:Y23Y	C13536T
EPI_ISL_448400	13536	C	T	13536	29903	NSP12b	Y23Y	SNP_silent	RNA-dependent RNA polymerase, post-ribosomal frameshift	NSP12b:Y23Y	C13536T
EPI_ISL_448401	13536	C	T	13536	29903	NSP12b	Y23Y	SNP_silent	RNA-dependent RNA polymerase, post-ribosomal frameshift	NSP12b:Y23Y	C13536T
EPI_ISL_448405	13536	C	T	13536	29903	NSP12b	Y23Y	SNP_silent	RNA-dependent RNA polymerase, post-ribosomal frameshift	NSP12b:Y23Y	C13536T
EPI_ISL_448407	13536	C	T	13536	29903	NSP12b	Y23Y	SNP_silent	RNA-dependent RNA polymerase, post-ribosomal frameshift	NSP12b:Y23Y	C13536T
EPI_ISL_448411	13536	C	T	13536	29903	NSP12b	Y23Y	SNP_silent	RNA-dependent RNA polymerase, post-ribosomal frameshift	NSP12b:Y23Y	C13536T
EPI_ISL_448418	13536	C	T	13536	29903	NSP12b	Y23Y	SNP_silent	RNA-dependent RNA polymerase, post-ribosomal frameshift	NSP12b:Y23Y	C13536T
EPI_ISL_448421	13536	C	T	13536	29903	NSP12b	Y23Y	SNP_silent	RNA-dependent RNA polymerase, post-ribosomal frameshift	NSP12b:Y23Y	C13536T
EPI_ISL_448422	13536	C	T	13536	29903	NSP12b	Y23Y	SNP_silent	RNA-dependent RNA polymerase, post-ribosomal frameshift	NSP12b:Y23Y	C13536T
EPI_ISL_448424	13536	C	T	13536	29903	NSP12b	Y23Y	SNP_silent	RNA-dependent RNA polymerase, post-ribosomal frameshift	NSP12b:Y23Y	C13536T
EPI_ISL_448427	13536	C	T	13536	29903	NSP12b	Y23Y	SNP_silent	RNA-dependent RNA polymerase, post-ribosomal frameshift	NSP12b:Y23Y	C13536T
EPI_ISL_448431	13536	C	T	13536	29903	NSP12b	Y23Y	SNP_silent	RNA-dependent RNA polymerase, post-ribosomal frameshift	NSP12b:Y23Y	C13536T
EPI_ISL_448445	13536	C	T	13536	29903	NSP12b	Y23Y	SNP_silent	RNA-dependent RNA polymerase, post-ribosomal frameshift	NSP12b:Y23Y	C13536T
EPI_ISL_448446	13536	C	T	13536	29903	NSP12b	Y23Y	SNP_silent	RNA-dependent RNA polymerase, post-ribosomal frameshift	NSP12b:Y23Y	C13536T
EPI_ISL_448447	13536	C	T	13536	29903	NSP12b	Y23Y	SNP_silent	RNA-dependent RNA polymerase, post-ribosomal frameshift	NSP12b:Y23Y	C13536T
EPI_ISL_448448	13536	C	T	13536	29903	NSP12b	Y23Y	SNP_silent	RNA-dependent RNA polymerase, post-ribosomal frameshift	NSP12b:Y23Y	C13536T
EPI_ISL_448718	13536	C	T	13536	29903	NSP12b	Y23Y	SNP_silent	RNA-dependent RNA polymerase, post-ribosomal frameshift	NSP12b:Y23Y	C13536T
EPI_ISL_448831	13536	C	T	13536	29903	NSP12b	Y23Y	SNP_silent	RNA-dependent RNA polymerase, post-ribosomal frameshift	NSP12b:Y23Y	C13536T
EPI_ISL_448848	13536	C	T	13536	29903	NSP12b	Y23Y	SNP_silent	RNA-dependent RNA polymerase, post-ribosomal frameshift	NSP12b:Y23Y	C13536T
EPI_ISL_448854	13536	C	T	13536	29903	NSP12b	Y23Y	SNP_silent	RNA-dependent RNA polymerase, post-ribosomal frameshift	NSP12b:Y23Y	C13536T
EPI_ISL_448876	13536	C	T	13536	29903	NSP12b	Y23Y	SNP_silent	RNA-dependent RNA polymerase, post-ribosomal frameshift	NSP12b:Y23Y	C13536T
EPI_ISL_450021	13536	C	T	13472	29694	NSP12b	Y23Y	SNP_silent	RNA-dependent RNA polymerase, post-ribosomal frameshift	NSP12b:Y23Y	C13536T
EPI_ISL_450570	13536	C	T	13536	29870	NSP12b	Y23Y	SNP_silent	RNA-dependent RNA polymerase, post-ribosomal frameshift	NSP12b:Y23Y	C13536T
EPI_ISL_450746	13536	C	T	13536	29903	NSP12b	Y23Y	SNP_silent	RNA-dependent RNA polymerase, post-ribosomal frameshift	NSP12b:Y23Y	C13536T
EPI_ISL_451644	13536	C	T	13506	29837	NSP12b	Y23Y	SNP_silent	RNA-dependent RNA polymerase, post-ribosomal frameshift	NSP12b:Y23Y	C13536T
EPI_ISL_451645	13536	C	T	13506	29837	NSP12b	Y23Y	SNP_silent	RNA-dependent RNA polymerase, post-ribosomal frameshift	NSP12b:Y23Y	C13536T
EPI_ISL_451646	13536	C	T	13482	29782	NSP12b	Y23Y	SNP_silent	RNA-dependent RNA polymerase, post-ribosomal frameshift	NSP12b:Y23Y	C13536T
EPI_ISL_451647	13536	C	T	13482	29782	NSP12b	Y23Y	SNP_silent	RNA-dependent RNA polymerase, post-ribosomal frameshift	NSP12b:Y23Y	C13536T
EPI_ISL_451648	13536	C	T	13506	29837	NSP12b	Y23Y	SNP_silent	RNA-dependent RNA polymerase, post-ribosomal frameshift	NSP12b:Y23Y	C13536T
EPI_ISL_451649	13536	C	T	13506	29837	NSP12b	Y23Y	SNP_silent	RNA-dependent RNA polymerase, post-ribosomal frameshift	NSP12b:Y23Y	C13536T
EPI_ISL_451650	13536	C	T	13506	29837	NSP12b	Y23Y	SNP_silent	RNA-dependent RNA polymerase, post-ribosomal frameshift	NSP12b:Y23Y	C13536T
EPI_ISL_451654	13536	C	T	13506	29837	NSP12b	Y23Y	SNP_silent	RNA-dependent RNA polymerase, post-ribosomal frameshift	NSP12b:Y23Y	C13536T
EPI_ISL_451751	13536	C	T	13536	29903	NSP12b	Y23Y	SNP_silent	RNA-dependent RNA polymerase, post-ribosomal frameshift	NSP12b:Y23Y	C13536T
EPI_ISL_451792	13536	C	T	13536	29903	NSP12b	Y23Y	SNP_silent	RNA-dependent RNA polymerase, post-ribosomal frameshift	NSP12b:Y23Y	C13536T
EPI_ISL_451934	13536	C	T	13526	29893	NSP12b	Y23Y	SNP_silent	RNA-dependent RNA polymerase, post-ribosomal frameshift	NSP12b:Y23Y	C13536T
EPI_ISL_452035	13536	C	T	13536	29903	NSP12b	Y23Y	SNP_silent	RNA-dependent RNA polymerase, post-ribosomal frameshift	NSP12b:Y23Y	C13536T
EPI_ISL_452140	13536	C	T	13511	29831	NSP12b	Y23Y	SNP_silent	RNA-dependent RNA polymerase, post-ribosomal frameshift	NSP12b:Y23Y	C13536T
EPI_ISL_452150	13536	C	T	13511	29846	NSP12b	Y23Y	SNP_silent	RNA-dependent RNA polymerase, post-ribosomal frameshift	NSP12b:Y23Y	C13536T
EPI_ISL_452154	13536	C	T	13535	29902	NSP12b	Y23Y	SNP_silent	RNA-dependent RNA polymerase, post-ribosomal frameshift	NSP12b:Y23Y	C13536T
EPI_ISL_452165	13536	C	T	13497	29864	NSP12b	Y23Y	SNP_silent	RNA-dependent RNA polymerase, post-ribosomal frameshift	NSP12b:Y23Y	C13536T
EPI_ISL_452166	13536	C	T	13536	29903	NSP12b	Y23Y	SNP_silent	RNA-dependent RNA polymerase, post-ribosomal frameshift	NSP12b:Y23Y	C13536T
EPI_ISL_452167	13536	C	T	13536	29903	NSP12b	Y23Y	SNP_silent	RNA-dependent RNA polymerase, post-ribosomal frameshift	NSP12b:Y23Y	C13536T
EPI_ISL_452168	13536	C	T	13536	29903	NSP12b	Y23Y	SNP_silent	RNA-dependent RNA polymerase, post-ribosomal frameshift	NSP12b:Y23Y	C13536T
EPI_ISL_452169	13536	C	T	13536	29903	NSP12b	Y23Y	SNP_silent	RNA-dependent RNA polymerase, post-ribosomal frameshift	NSP12b:Y23Y	C13536T
EPI_ISL_452170	13536	C	T	13502	29869	NSP12b	Y23Y	SNP_silent	RNA-dependent RNA polymerase, post-ribosomal frameshift	NSP12b:Y23Y	C13536T
EPI_ISL_452171	13536	C	T	13506	29873	NSP12b	Y23Y	SNP_silent	RNA-dependent RNA polymerase, post-ribosomal frameshift	NSP12b:Y23Y	C13536T
EPI_ISL_452172	13536	C	T	13536	29903	NSP12b	Y23Y	SNP_silent	RNA-dependent RNA polymerase, post-ribosomal frameshift	NSP12b:Y23Y	C13536T
EPI_ISL_452173	13536	C	T	13536	29903	NSP12b	Y23Y	SNP_silent	RNA-dependent RNA polymerase, post-ribosomal frameshift	NSP12b:Y23Y	C13536T
EPI_ISL_452175	13536	C	T	13499	29866	NSP12b	Y23Y	SNP_silent	RNA-dependent RNA polymerase, post-ribosomal frameshift	NSP12b:Y23Y	C13536T
EPI_ISL_452312	13536	C	T	13536	29899	NSP12b	Y23Y	SNP_silent	RNA-dependent RNA polymerase, post-ribosomal frameshift	NSP12b:Y23Y	C13536T
EPI_ISL_452483	13536	C	T	13536	29903	NSP12b	Y23Y	SNP_silent	RNA-dependent RNA polymerase, post-ribosomal frameshift	NSP12b:Y23Y	C13536T
EPI_ISL_452865	13536	C	T	13536	29903	NSP12b	Y23Y	SNP_silent	RNA-dependent RNA polymerase, post-ribosomal frameshift	NSP12b:Y23Y	C13536T
EPI_ISL_452885	13536	C	T	13536	29903	NSP12b	Y23Y	SNP_silent	RNA-dependent RNA polymerase, post-ribosomal frameshift	NSP12b:Y23Y	C13536T
EPI_ISL_452936	13536	C	T	13536	29903	NSP12b	Y23Y	SNP_silent	RNA-dependent RNA polymerase, post-ribosomal frameshift	NSP12b:Y23Y	C13536T
EPI_ISL_452946	13536	C	T	13536	29903	NSP12b	Y23Y	SNP_silent	RNA-dependent RNA polymerase, post-ribosomal frameshift	NSP12b:Y23Y	C13536T
EPI_ISL_452948	13536	C	T	13536	29903	NSP12b	Y23Y	SNP_silent	RNA-dependent RNA polymerase, post-ribosomal frameshift	NSP12b:Y23Y	C13536T
EPI_ISL_452962	13536	C	T	13536	29903	NSP12b	Y23Y	SNP_silent	RNA-dependent RNA polymerase, post-ribosomal frameshift	NSP12b:Y23Y	C13536T
EPI_ISL_452963	13536	C	T	13536	29903	NSP12b	Y23Y	SNP_silent	RNA-dependent RNA polymerase, post-ribosomal frameshift	NSP12b:Y23Y	C13536T
EPI_ISL_452979	13536	C	T	13536	29903	NSP12b	Y23Y	SNP_silent	RNA-dependent RNA polymerase, post-ribosomal frameshift	NSP12b:Y23Y	C13536T
EPI_ISL_452993	13536	C	T	13536	29903	NSP12b	Y23Y	SNP_silent	RNA-dependent RNA polymerase, post-ribosomal frameshift	NSP12b:Y23Y	C13536T
EPI_ISL_452994	13536	C	T	13536	29903	NSP12b	Y23Y	SNP_silent	RNA-dependent RNA polymerase, post-ribosomal frameshift	NSP12b:Y23Y	C13536T
EPI_ISL_453064	13536	C	T	13536	29903	NSP12b	Y23Y	SNP_silent	RNA-dependent RNA polymerase, post-ribosomal frameshift	NSP12b:Y23Y	C13536T
EPI_ISL_453535	13536	C	T	13536	29903	NSP12b	Y23Y	SNP_silent	RNA-dependent RNA polymerase, post-ribosomal frameshift	NSP12b:Y23Y	C13536T
EPI_ISL_453619	13536	C	T	13536	29903	NSP12b	Y23Y	SNP_silent	RNA-dependent RNA polymerase, post-ribosomal frameshift	NSP12b:Y23Y	C13536T
EPI_ISL_453622	13536	C	T	13536	29903	NSP12b	Y23Y	SNP_silent	RNA-dependent RNA polymerase, post-ribosomal frameshift	NSP12b:Y23Y	C13536T
EPI_ISL_453623	13536	C	T	13536	29903	NSP12b	Y23Y	SNP_silent	RNA-dependent RNA polymerase, post-ribosomal frameshift	NSP12b:Y23Y	C13536T
EPI_ISL_453627	13536	C	T	13536	29903	NSP12b	Y23Y	SNP_silent	RNA-dependent RNA polymerase, post-ribosomal frameshift	NSP12b:Y23Y	C13536T
EPI_ISL_453629	13536	C	T	13536	29903	NSP12b	Y23Y	SNP_silent	RNA-dependent RNA polymerase, post-ribosomal frameshift	NSP12b:Y23Y	C13536T
EPI_ISL_453630	13536	C	T	13536	29903	NSP12b	Y23Y	SNP_silent	RNA-dependent RNA polymerase, post-ribosomal frameshift	NSP12b:Y23Y	C13536T
EPI_ISL_453634	13536	C	T	13536	29903	NSP12b	Y23Y	SNP_silent	RNA-dependent RNA polymerase, post-ribosomal frameshift	NSP12b:Y23Y	C13536T
EPI_ISL_453645	13536	C	T	13536	29903	NSP12b	Y23Y	SNP_silent	RNA-dependent RNA polymerase, post-ribosomal frameshift	NSP12b:Y23Y	C13536T
EPI_ISL_453648	13536	C	T	13536	29903	NSP12b	Y23Y	SNP_silent	RNA-dependent RNA polymerase, post-ribosomal frameshift	NSP12b:Y23Y	C13536T
EPI_ISL_453651	13536	C	T	13536	29903	NSP12b	Y23Y	SNP_silent	RNA-dependent RNA polymerase, post-ribosomal frameshift	NSP12b:Y23Y	C13536T
EPI_ISL_453655	13536	C	T	13536	29903	NSP12b	Y23Y	SNP_silent	RNA-dependent RNA polymerase, post-ribosomal frameshift	NSP12b:Y23Y	C13536T
EPI_ISL_453656	13536	C	T	13536	29903	NSP12b	Y23Y	SNP_silent	RNA-dependent RNA polymerase, post-ribosomal frameshift	NSP12b:Y23Y	C13536T
EPI_ISL_453657	13536	C	T	13536	29903	NSP12b	Y23Y	SNP_silent	RNA-dependent RNA polymerase, post-ribosomal frameshift	NSP12b:Y23Y	C13536T
EPI_ISL_453660	13536	C	T	13536	29903	NSP12b	Y23Y	SNP_silent	RNA-dependent RNA polymerase, post-ribosomal frameshift	NSP12b:Y23Y	C13536T
EPI_ISL_453661	13536	C	T	13536	29903	NSP12b	Y23Y	SNP_silent	RNA-dependent RNA polymerase, post-ribosomal frameshift	NSP12b:Y23Y	C13536T
EPI_ISL_453700	13536	C	T	13536	29903	NSP12b	Y23Y	SNP_silent	RNA-dependent RNA polymerase, post-ribosomal frameshift	NSP12b:Y23Y	C13536T
EPI_ISL_453706	13536	C	T	13536	29903	NSP12b	Y23Y	SNP_silent	RNA-dependent RNA polymerase, post-ribosomal frameshift	NSP12b:Y23Y	C13536T
EPI_ISL_453732	13536	C	T	13536	29903	NSP12b	Y23Y	SNP_silent	RNA-dependent RNA polymerase, post-ribosomal frameshift	NSP12b:Y23Y	C13536T
EPI_ISL_453751	13536	C	T	13536	29903	NSP12b	Y23Y	SNP_silent	RNA-dependent RNA polymerase, post-ribosomal frameshift	NSP12b:Y23Y	C13536T
EPI_ISL_453762	13536	C	T	13536	29903	NSP12b	Y23Y	SNP_silent	RNA-dependent RNA polymerase, post-ribosomal frameshift	NSP12b:Y23Y	C13536T
EPI_ISL_454044	13536	C	T	13496	29763	NSP12b	Y23Y	SNP_silent	RNA-dependent RNA polymerase, post-ribosomal frameshift	NSP12b:Y23Y	C13536T
EPI_ISL_454171	13536	C	T	13386	29603	NSP12b	Y23Y	SNP_silent	RNA-dependent RNA polymerase, post-ribosomal frameshift	NSP12b:Y23Y	C13536T
EPI_ISL_454328	13536	C	T	13496	29763	NSP12b	Y23Y	SNP_silent	RNA-dependent RNA polymerase, post-ribosomal frameshift	NSP12b:Y23Y	C13536T
EPI_ISL_454330	13536	C	T	13496	29763	NSP12b	Y23Y	SNP_silent	RNA-dependent RNA polymerase, post-ribosomal frameshift	NSP12b:Y23Y	C13536T
EPI_ISL_454331	13536	C	T	13496	29763	NSP12b	Y23Y	SNP_silent	RNA-dependent RNA polymerase, post-ribosomal frameshift	NSP12b:Y23Y	C13536T
EPI_ISL_454592	13536	C	T	13530	29851	NSP12b	Y23Y	SNP_silent	RNA-dependent RNA polymerase, post-ribosomal frameshift	NSP12b:Y23Y	C13536T
EPI_ISL_454787	13536	C	T	13530	29891	NSP12b	Y23Y	SNP_silent	RNA-dependent RNA polymerase, post-ribosomal frameshift	NSP12b:Y23Y	C13536T
EPI_ISL_454793	13536	C	T	13532	29893	NSP12b	Y23Y	SNP_silent	RNA-dependent RNA polymerase, post-ribosomal frameshift	NSP12b:Y23Y	C13536T
EPI_ISL_455161	13536	C	T	13482	29775	NSP12b	Y23Y	SNP_silent	RNA-dependent RNA polymerase, post-ribosomal frameshift	NSP12b:Y23Y	C13536T
EPI_ISL_455305	13536	C	T	13482	29775	NSP12b	Y23Y	SNP_silent	RNA-dependent RNA polymerase, post-ribosomal frameshift	NSP12b:Y23Y	C13536T
EPI_ISL_455961	13536	C	T	13536	29903	NSP12b	Y23Y	SNP_silent	RNA-dependent RNA polymerase, post-ribosomal frameshift	NSP12b:Y23Y	C13536T
EPI_ISL_456419	13536	C	T	13536	29903	NSP12b	Y23Y	SNP_silent	RNA-dependent RNA polymerase, post-ribosomal frameshift	NSP12b:Y23Y	C13536T
EPI_ISL_456422	13536	C	T	13536	29903	NSP12b	Y23Y	SNP_silent	RNA-dependent RNA polymerase, post-ribosomal frameshift	NSP12b:Y23Y	C13536T
EPI_ISL_456424	13536	C	T	13536	29903	NSP12b	Y23Y	SNP_silent	RNA-dependent RNA polymerase, post-ribosomal frameshift	NSP12b:Y23Y	C13536T
EPI_ISL_456426	13536	C	T	13536	29903	NSP12b	Y23Y	SNP_silent	RNA-dependent RNA polymerase, post-ribosomal frameshift	NSP12b:Y23Y	C13536T
EPI_ISL_456437	13536	C	T	13536	29904	NSP12b	Y23Y	SNP_silent	RNA-dependent RNA polymerase, post-ribosomal frameshift	NSP12b:Y23Y	C13536T
EPI_ISL_456684	13536	C	T	13536	29903	NSP12b	Y23Y	SNP_silent	RNA-dependent RNA polymerase, post-ribosomal frameshift	NSP12b:Y23Y	C13536T
EPI_ISL_456687	13536	C	T	13536	29903	NSP12b	Y23Y	SNP_silent	RNA-dependent RNA polymerase, post-ribosomal frameshift	NSP12b:Y23Y	C13536T
EPI_ISL_456693	13536	C	T	13536	29903	NSP12b	Y23Y	SNP_silent	RNA-dependent RNA polymerase, post-ribosomal frameshift	NSP12b:Y23Y	C13536T
EPI_ISL_456697	13536	C	T	13536	29903	NSP12b	Y23Y	SNP_silent	RNA-dependent RNA polymerase, post-ribosomal frameshift	NSP12b:Y23Y	C13536T
EPI_ISL_456699	13536	C	T	13536	29903	NSP12b	Y23Y	SNP_silent	RNA-dependent RNA polymerase, post-ribosomal frameshift	NSP12b:Y23Y	C13536T
EPI_ISL_456701	13536	C	T	13536	29903	NSP12b	Y23Y	SNP_silent	RNA-dependent RNA polymerase, post-ribosomal frameshift	NSP12b:Y23Y	C13536T
EPI_ISL_456704	13536	C	T	13536	29903	NSP12b	Y23Y	SNP_silent	RNA-dependent RNA polymerase, post-ribosomal frameshift	NSP12b:Y23Y	C13536T
EPI_ISL_456717	13536	C	T	13536	29903	NSP12b	Y23Y	SNP_silent	RNA-dependent RNA polymerase, post-ribosomal frameshift	NSP12b:Y23Y	C13536T
EPI_ISL_456721	13536	C	T	13536	29903	NSP12b	Y23Y	SNP_silent	RNA-dependent RNA polymerase, post-ribosomal frameshift	NSP12b:Y23Y	C13536T
EPI_ISL_456727	13536	C	T	13536	29903	NSP12b	Y23Y	SNP_silent	RNA-dependent RNA polymerase, post-ribosomal frameshift	NSP12b:Y23Y	C13536T
EPI_ISL_456729	13536	C	T	13536	29903	NSP12b	Y23Y	SNP_silent	RNA-dependent RNA polymerase, post-ribosomal frameshift	NSP12b:Y23Y	C13536T
EPI_ISL_456734	13536	C	T	13536	29903	NSP12b	Y23Y	SNP_silent	RNA-dependent RNA polymerase, post-ribosomal frameshift	NSP12b:Y23Y	C13536T
EPI_ISL_456740	13536	C	T	13536	29903	NSP12b	Y23Y	SNP_silent	RNA-dependent RNA polymerase, post-ribosomal frameshift	NSP12b:Y23Y	C13536T
EPI_ISL_456747	13536	C	T	13536	29903	NSP12b	Y23Y	SNP_silent	RNA-dependent RNA polymerase, post-ribosomal frameshift	NSP12b:Y23Y	C13536T
EPI_ISL_456749	13536	C	T	13536	29903	NSP12b	Y23Y	SNP_silent	RNA-dependent RNA polymerase, post-ribosomal frameshift	NSP12b:Y23Y	C13536T
EPI_ISL_456754	13536	C	T	13536	29903	NSP12b	Y23Y	SNP_silent	RNA-dependent RNA polymerase, post-ribosomal frameshift	NSP12b:Y23Y	C13536T
EPI_ISL_457024	13536	C	T	13536	29903	NSP12b	Y23Y	SNP_silent	RNA-dependent RNA polymerase, post-ribosomal frameshift	NSP12b:Y23Y	C13536T
EPI_ISL_457147	13536	C	T	13536	29903	NSP12b	Y23Y	SNP_silent	RNA-dependent RNA polymerase, post-ribosomal frameshift	NSP12b:Y23Y	C13536T
EPI_ISL_457202	13536	C	T	13536	29903	NSP12b	Y23Y	SNP_silent	RNA-dependent RNA polymerase, post-ribosomal frameshift	NSP12b:Y23Y	C13536T
EPI_ISL_457206	13536	C	T	13536	29903	NSP12b	Y23Y	SNP_silent	RNA-dependent RNA polymerase, post-ribosomal frameshift	NSP12b:Y23Y	C13536T
EPI_ISL_457277	13536	C	T	13536	29903	NSP12b	Y23Y	SNP_silent	RNA-dependent RNA polymerase, post-ribosomal frameshift	NSP12b:Y23Y	C13536T
EPI_ISL_457290	13536	C	T	13536	29903	NSP12b	Y23Y	SNP_silent	RNA-dependent RNA polymerase, post-ribosomal frameshift	NSP12b:Y23Y	C13536T
EPI_ISL_457291	13536	C	T	13536	29903	NSP12b	Y23Y	SNP_silent	RNA-dependent RNA polymerase, post-ribosomal frameshift	NSP12b:Y23Y	C13536T
EPI_ISL_457401	13536	C	T	13519	29886	NSP12b	Y23Y	SNP_silent	RNA-dependent RNA polymerase, post-ribosomal frameshift	NSP12b:Y23Y	C13536T
EPI_ISL_457563	13536	C	T	13535	29902	NSP12b	Y23Y	SNP_silent	RNA-dependent RNA polymerase, post-ribosomal frameshift	NSP12b:Y23Y	C13536T
EPI_ISL_457573	13536	C	T	13536	29903	NSP12b	Y23Y	SNP_silent	RNA-dependent RNA polymerase, post-ribosomal frameshift	NSP12b:Y23Y	C13536T
EPI_ISL_457578	13536	C	T	13536	29903	NSP12b	Y23Y	SNP_silent	RNA-dependent RNA polymerase, post-ribosomal frameshift	NSP12b:Y23Y	C13536T
EPI_ISL_457579	13536	C	T	13536	29903	NSP12b	Y23Y	SNP_silent	RNA-dependent RNA polymerase, post-ribosomal frameshift	NSP12b:Y23Y	C13536T
EPI_ISL_457585	13536	C	T	13536	29903	NSP12b	Y23Y	SNP_silent	RNA-dependent RNA polymerase, post-ribosomal frameshift	NSP12b:Y23Y	C13536T
EPI_ISL_457616	13536	C	T	13536	29903	NSP12b	Y23Y	SNP_silent	RNA-dependent RNA polymerase, post-ribosomal frameshift	NSP12b:Y23Y	C13536T
EPI_ISL_457632	13536	C	T	13536	29903	NSP12b	Y23Y	SNP_silent	RNA-dependent RNA polymerase, post-ribosomal frameshift	NSP12b:Y23Y	C13536T
EPI_ISL_457636	13536	C	T	13536	29903	NSP12b	Y23Y	SNP_silent	RNA-dependent RNA polymerase, post-ribosomal frameshift	NSP12b:Y23Y	C13536T
EPI_ISL_457651	13536	C	T	13536	29903	NSP12b	Y23Y	SNP_silent	RNA-dependent RNA polymerase, post-ribosomal frameshift	NSP12b:Y23Y	C13536T
EPI_ISL_457676	13536	C	T	13536	29903	NSP12b	Y23Y	SNP_silent	RNA-dependent RNA polymerase, post-ribosomal frameshift	NSP12b:Y23Y	C13536T
EPI_ISL_457686	13536	C	T	13536	29903	NSP12b	Y23Y	SNP_silent	RNA-dependent RNA polymerase, post-ribosomal frameshift	NSP12b:Y23Y	C13536T
EPI_ISL_457934	13536	C	T	13482	29782	NSP12b	Y23Y	SNP_silent	RNA-dependent RNA polymerase, post-ribosomal frameshift	NSP12b:Y23Y	C13536T
EPI_ISL_457957	13536	C	T	13336	29541	NSP12b	Y23Y	SNP_silent	RNA-dependent RNA polymerase, post-ribosomal frameshift	NSP12b:Y23Y	C13536T
EPI_ISL_457962	13536	C	T	13336	29541	NSP12b	Y23Y	SNP_silent	RNA-dependent RNA polymerase, post-ribosomal frameshift	NSP12b:Y23Y	C13536T
EPI_ISL_457963	13536	C	T	13336	29541	NSP12b	Y23Y	SNP_silent	RNA-dependent RNA polymerase, post-ribosomal frameshift	NSP12b:Y23Y	C13536T
EPI_ISL_458178	13536	C	T	13482	29782	NSP12b	Y23Y	SNP_silent	RNA-dependent RNA polymerase, post-ribosomal frameshift	NSP12b:Y23Y	C13536T
EPI_ISL_458180	13536	C	T	13482	29782	NSP12b	Y23Y	SNP_silent	RNA-dependent RNA polymerase, post-ribosomal frameshift	NSP12b:Y23Y	C13536T
EPI_ISL_458185	13536	C	T	13482	29782	NSP12b	Y23Y	SNP_silent	RNA-dependent RNA polymerase, post-ribosomal frameshift	NSP12b:Y23Y	C13536T
EPI_ISL_458222	13536	C	T	13482	29782	NSP12b	Y23Y	SNP_silent	RNA-dependent RNA polymerase, post-ribosomal frameshift	NSP12b:Y23Y	C13536T
EPI_ISL_458539	13536	C	T	13482	29782	NSP12b	Y23Y	SNP_silent	RNA-dependent RNA polymerase, post-ribosomal frameshift	NSP12b:Y23Y	C13536T
EPI_ISL_458979	13536	C	T	13482	29782	NSP12b	Y23Y	SNP_silent	RNA-dependent RNA polymerase, post-ribosomal frameshift	NSP12b:Y23Y	C13536T
EPI_ISL_459016	13536	C	T	13482	29782	NSP12b	Y23Y	SNP_silent	RNA-dependent RNA polymerase, post-ribosomal frameshift	NSP12b:Y23Y	C13536T
EPI_ISL_459076	13536	C	T	13482	29782	NSP12b	Y23Y	SNP_silent	RNA-dependent RNA polymerase, post-ribosomal frameshift	NSP12b:Y23Y	C13536T
EPI_ISL_459180	13536	C	T	13482	29782	NSP12b	Y23Y	SNP_silent	RNA-dependent RNA polymerase, post-ribosomal frameshift	NSP12b:Y23Y	C13536T
EPI_ISL_459182	13536	C	T	13482	29782	NSP12b	Y23Y	SNP_silent	RNA-dependent RNA polymerase, post-ribosomal frameshift	NSP12b:Y23Y	C13536T
EPI_ISL_459184	13536	C	T	13482	29782	NSP12b	Y23Y	SNP_silent	RNA-dependent RNA polymerase, post-ribosomal frameshift	NSP12b:Y23Y	C13536T
EPI_ISL_459193	13536	C	T	13482	29782	NSP12b	Y23Y	SNP_silent	RNA-dependent RNA polymerase, post-ribosomal frameshift	NSP12b:Y23Y	C13536T
EPI_ISL_459215	13536	C	T	13482	29782	NSP12b	Y23Y	SNP_silent	RNA-dependent RNA polymerase, post-ribosomal frameshift	NSP12b:Y23Y	C13536T
EPI_ISL_459217	13536	C	T	13482	29782	NSP12b	Y23Y	SNP_silent	RNA-dependent RNA polymerase, post-ribosomal frameshift	NSP12b:Y23Y	C13536T
EPI_ISL_459223	13536	C	T	13482	29782	NSP12b	Y23Y	SNP_silent	RNA-dependent RNA polymerase, post-ribosomal frameshift	NSP12b:Y23Y	C13536T
EPI_ISL_459228	13536	C	T	13482	29783	NSP12b	Y23Y	SNP_silent	RNA-dependent RNA polymerase, post-ribosomal frameshift	NSP12b:Y23Y	C13536T
EPI_ISL_459262	13536	C	T	13482	29782	NSP12b	Y23Y	SNP_silent	RNA-dependent RNA polymerase, post-ribosomal frameshift	NSP12b:Y23Y	C13536T
EPI_ISL_459264	13536	C	T	13482	29782	NSP12b	Y23Y	SNP_silent	RNA-dependent RNA polymerase, post-ribosomal frameshift	NSP12b:Y23Y	C13536T
EPI_ISL_459309	13536	C	T	13482	29783	NSP12b	Y23Y	SNP_silent	RNA-dependent RNA polymerase, post-ribosomal frameshift	NSP12b:Y23Y	C13536T
EPI_ISL_459412	13536	C	T	13482	29782	NSP12b	Y23Y	SNP_silent	RNA-dependent RNA polymerase, post-ribosomal frameshift	NSP12b:Y23Y	C13536T
EPI_ISL_459417	13536	C	T	13482	29782	NSP12b	Y23Y	SNP_silent	RNA-dependent RNA polymerase, post-ribosomal frameshift	NSP12b:Y23Y	C13536T
EPI_ISL_459419	13536	C	T	13482	29782	NSP12b	Y23Y	SNP_silent	RNA-dependent RNA polymerase, post-ribosomal frameshift	NSP12b:Y23Y	C13536T
EPI_ISL_459421	13536	C	T	13482	29782	NSP12b	Y23Y	SNP_silent	RNA-dependent RNA polymerase, post-ribosomal frameshift	NSP12b:Y23Y	C13536T
EPI_ISL_459427	13536	C	T	13482	29782	NSP12b	Y23Y	SNP_silent	RNA-dependent RNA polymerase, post-ribosomal frameshift	NSP12b:Y23Y	C13536T
EPI_ISL_459438	13536	C	T	13482	29782	NSP12b	Y23Y	SNP_silent	RNA-dependent RNA polymerase, post-ribosomal frameshift	NSP12b:Y23Y	C13536T
EPI_ISL_459441	13536	C	T	13482	29782	NSP12b	Y23Y	SNP_silent	RNA-dependent RNA polymerase, post-ribosomal frameshift	NSP12b:Y23Y	C13536T
EPI_ISL_459448	13536	C	T	13482	29782	NSP12b	Y23Y	SNP_silent	RNA-dependent RNA polymerase, post-ribosomal frameshift	NSP12b:Y23Y	C13536T
EPI_ISL_459449	13536	C	T	13482	29782	NSP12b	Y23Y	SNP_silent	RNA-dependent RNA polymerase, post-ribosomal frameshift	NSP12b:Y23Y	C13536T
EPI_ISL_459467	13536	C	T	13482	29782	NSP12b	Y23Y	SNP_silent	RNA-dependent RNA polymerase, post-ribosomal frameshift	NSP12b:Y23Y	C13536T
EPI_ISL_459477	13536	C	T	13482	29782	NSP12b	Y23Y	SNP_silent	RNA-dependent RNA polymerase, post-ribosomal frameshift	NSP12b:Y23Y	C13536T
EPI_ISL_459491	13536	C	T	13482	29782	NSP12b	Y23Y	SNP_silent	RNA-dependent RNA polymerase, post-ribosomal frameshift	NSP12b:Y23Y	C13536T
EPI_ISL_459495	13536	C	T	13482	29782	NSP12b	Y23Y	SNP_silent	RNA-dependent RNA polymerase, post-ribosomal frameshift	NSP12b:Y23Y	C13536T
EPI_ISL_461161	13536	C	T	13482	29775	NSP12b	Y23Y	SNP_silent	RNA-dependent RNA polymerase, post-ribosomal frameshift	NSP12b:Y23Y	C13536T
EPI_ISL_461185	13536	C	T	13482	29775	NSP12b	Y23Y	SNP_silent	RNA-dependent RNA polymerase, post-ribosomal frameshift	NSP12b:Y23Y	C13536T
EPI_ISL_461193	13536	C	T	13482	29775	NSP12b	Y23Y	SNP_silent	RNA-dependent RNA polymerase, post-ribosomal frameshift	NSP12b:Y23Y	C13536T
EPI_ISL_461195	13536	C	T	13482	29775	NSP12b	Y23Y	SNP_silent	RNA-dependent RNA polymerase, post-ribosomal frameshift	NSP12b:Y23Y	C13536T
EPI_ISL_461197	13536	C	T	13482	29775	NSP12b	Y23Y	SNP_silent	RNA-dependent RNA polymerase, post-ribosomal frameshift	NSP12b:Y23Y	C13536T
EPI_ISL_461198	13536	C	T	13482	29775	NSP12b	Y23Y	SNP_silent	RNA-dependent RNA polymerase, post-ribosomal frameshift	NSP12b:Y23Y	C13536T
EPI_ISL_461199	13536	C	T	13482	29775	NSP12b	Y23Y	SNP_silent	RNA-dependent RNA polymerase, post-ribosomal frameshift	NSP12b:Y23Y	C13536T
EPI_ISL_461201	13536	C	T	13482	29775	NSP12b	Y23Y	SNP_silent	RNA-dependent RNA polymerase, post-ribosomal frameshift	NSP12b:Y23Y	C13536T
EPI_ISL_461270	13536	C	T	13482	29775	NSP12b	Y23Y	SNP_silent	RNA-dependent RNA polymerase, post-ribosomal frameshift	NSP12b:Y23Y	C13536T
EPI_ISL_461562	13536	C	T	13536	29903	NSP12b	Y23Y	SNP_silent	RNA-dependent RNA polymerase, post-ribosomal frameshift	NSP12b:Y23Y	C13536T
EPI_ISL_461565	13536	C	T	13536	29903	NSP12b	Y23Y	SNP_silent	RNA-dependent RNA polymerase, post-ribosomal frameshift	NSP12b:Y23Y	C13536T
EPI_ISL_461578	13536	C	T	13536	29903	NSP12b	Y23Y	SNP_silent	RNA-dependent RNA polymerase, post-ribosomal frameshift	NSP12b:Y23Y	C13536T
EPI_ISL_461586	13536	C	T	13536	29900	NSP12b	Y23Y	SNP_silent	RNA-dependent RNA polymerase, post-ribosomal frameshift	NSP12b:Y23Y	C13536T
EPI_ISL_461588	13536	C	T	13536	29903	NSP12b	Y23Y	SNP_silent	RNA-dependent RNA polymerase, post-ribosomal frameshift	NSP12b:Y23Y	C13536T
EPI_ISL_461895	13536	C	T	13536	29903	NSP12b	Y23Y	SNP_silent	RNA-dependent RNA polymerase, post-ribosomal frameshift	NSP12b:Y23Y	C13536T
EPI_ISL_461897	13536	C	T	13536	29903	NSP12b	Y23Y	SNP_silent	RNA-dependent RNA polymerase, post-ribosomal frameshift	NSP12b:Y23Y	C13536T
EPI_ISL_461898	13536	C	T	13536	29903	NSP12b	Y23Y	SNP_silent	RNA-dependent RNA polymerase, post-ribosomal frameshift	NSP12b:Y23Y	C13536T
EPI_ISL_461909	13536	C	T	13536	29903	NSP12b	Y23Y	SNP_silent	RNA-dependent RNA polymerase, post-ribosomal frameshift	NSP12b:Y23Y	C13536T
EPI_ISL_461913	13536	C	T	13536	29903	NSP12b	Y23Y	SNP_silent	RNA-dependent RNA polymerase, post-ribosomal frameshift	NSP12b:Y23Y	C13536T
EPI_ISL_461925	13536	C	T	13536	29903	NSP12b	Y23Y	SNP_silent	RNA-dependent RNA polymerase, post-ribosomal frameshift	NSP12b:Y23Y	C13536T
EPI_ISL_461926	13536	C	T	13536	29903	NSP12b	Y23Y	SNP_silent	RNA-dependent RNA polymerase, post-ribosomal frameshift	NSP12b:Y23Y	C13536T
EPI_ISL_461927	13536	C	T	13536	29903	NSP12b	Y23Y	SNP_silent	RNA-dependent RNA polymerase, post-ribosomal frameshift	NSP12b:Y23Y	C13536T
EPI_ISL_461928	13536	C	T	13536	29903	NSP12b	Y23Y	SNP_silent	RNA-dependent RNA polymerase, post-ribosomal frameshift	NSP12b:Y23Y	C13536T
EPI_ISL_461937	13536	C	T	13536	29903	NSP12b	Y23Y	SNP_silent	RNA-dependent RNA polymerase, post-ribosomal frameshift	NSP12b:Y23Y	C13536T
EPI_ISL_461949	13536	C	T	13536	29903	NSP12b	Y23Y	SNP_silent	RNA-dependent RNA polymerase, post-ribosomal frameshift	NSP12b:Y23Y	C13536T
EPI_ISL_461957	13536	C	T	13536	29903	NSP12b	Y23Y	SNP_silent	RNA-dependent RNA polymerase, post-ribosomal frameshift	NSP12b:Y23Y	C13536T
EPI_ISL_462001	13536	C	T	13536	29903	NSP12b	Y23Y	SNP_silent	RNA-dependent RNA polymerase, post-ribosomal frameshift	NSP12b:Y23Y	C13536T
EPI_ISL_462003	13536	C	T	13536	29903	NSP12b	Y23Y	SNP_silent	RNA-dependent RNA polymerase, post-ribosomal frameshift	NSP12b:Y23Y	C13536T
EPI_ISL_462011	13536	C	T	13536	29903	NSP12b	Y23Y	SNP_silent	RNA-dependent RNA polymerase, post-ribosomal frameshift	NSP12b:Y23Y	C13536T
EPI_ISL_462017	13536	C	T	13536	29903	NSP12b	Y23Y	SNP_silent	RNA-dependent RNA polymerase, post-ribosomal frameshift	NSP12b:Y23Y	C13536T
EPI_ISL_462027	13536	C	T	13536	29903	NSP12b	Y23Y	SNP_silent	RNA-dependent RNA polymerase, post-ribosomal frameshift	NSP12b:Y23Y	C13536T
EPI_ISL_462062	13536	C	T	13536	29903	NSP12b	Y23Y	SNP_silent	RNA-dependent RNA polymerase, post-ribosomal frameshift	NSP12b:Y23Y	C13536T
EPI_ISL_462082	13536	C	T	13536	29903	NSP12b	Y23Y	SNP_silent	RNA-dependent RNA polymerase, post-ribosomal frameshift	NSP12b:Y23Y	C13536T
EPI_ISL_462213	13536	C	T	13482	29782	NSP12b	Y23Y	SNP_silent	RNA-dependent RNA polymerase, post-ribosomal frameshift	NSP12b:Y23Y	C13536T
EPI_ISL_462247	13536	C	T	13482	29782	NSP12b	Y23Y	SNP_silent	RNA-dependent RNA polymerase, post-ribosomal frameshift	NSP12b:Y23Y	C13536T
EPI_ISL_462250	13536	C	T	13482	29782	NSP12b	Y23Y	SNP_silent	RNA-dependent RNA polymerase, post-ribosomal frameshift	NSP12b:Y23Y	C13536T
EPI_ISL_462251	13536	C	T	13482	29782	NSP12b	Y23Y	SNP_silent	RNA-dependent RNA polymerase, post-ribosomal frameshift	NSP12b:Y23Y	C13536T
EPI_ISL_462272	13536	C	T	13482	29782	NSP12b	Y23Y	SNP_silent	RNA-dependent RNA polymerase, post-ribosomal frameshift	NSP12b:Y23Y	C13536T
EPI_ISL_462273	13536	C	T	13482	29782	NSP12b	Y23Y	SNP_silent	RNA-dependent RNA polymerase, post-ribosomal frameshift	NSP12b:Y23Y	C13536T
EPI_ISL_462274	13536	C	T	13482	29782	NSP12b	Y23Y	SNP_silent	RNA-dependent RNA polymerase, post-ribosomal frameshift	NSP12b:Y23Y	C13536T
EPI_ISL_462391	13536	C	T	13536	29891	NSP12b	Y23Y	SNP_silent	RNA-dependent RNA polymerase, post-ribosomal frameshift	NSP12b:Y23Y	C13536T
EPI_ISL_462714	13536	C	T	13536	29903	NSP12b	Y23Y	SNP_silent	RNA-dependent RNA polymerase, post-ribosomal frameshift	NSP12b:Y23Y	C13536T
EPI_ISL_463925	13536	C	T	13536	29903	NSP12b	Y23Y	SNP_silent	RNA-dependent RNA polymerase, post-ribosomal frameshift	NSP12b:Y23Y	C13536T
EPI_ISL_464066	13536	C	T	13482	29782	NSP12b	Y23Y	SNP_silent	RNA-dependent RNA polymerase, post-ribosomal frameshift	NSP12b:Y23Y	C13536T
EPI_ISL_464073	13536	C	T	13482	29782	NSP12b	Y23Y	SNP_silent	RNA-dependent RNA polymerase, post-ribosomal frameshift	NSP12b:Y23Y	C13536T
EPI_ISL_464080	13536	C	T	13482	29782	NSP12b	Y23Y	SNP_silent	RNA-dependent RNA polymerase, post-ribosomal frameshift	NSP12b:Y23Y	C13536T
EPI_ISL_464140	13536	C	T	13536	29903	NSP12b	Y23Y	SNP_silent	RNA-dependent RNA polymerase, post-ribosomal frameshift	NSP12b:Y23Y	C13536T
EPI_ISL_464141	13536	C	T	13536	29903	NSP12b	Y23Y	SNP_silent	RNA-dependent RNA polymerase, post-ribosomal frameshift	NSP12b:Y23Y	C13536T
EPI_ISL_464494	13536	C	T	13536	29903	NSP12b	Y23Y	SNP_silent	RNA-dependent RNA polymerase, post-ribosomal frameshift	NSP12b:Y23Y	C13536T
EPI_ISL_464818	13536	C	T	13536	29903	NSP12b	Y23Y	SNP_silent	RNA-dependent RNA polymerase, post-ribosomal frameshift	NSP12b:Y23Y	C13536T
EPI_ISL_464886	13536	C	T	13536	29903	NSP12b	Y23Y	SNP_silent	RNA-dependent RNA polymerase, post-ribosomal frameshift	NSP12b:Y23Y	C13536T
EPI_ISL_464945	13536	C	T	13536	29903	NSP12b	Y23Y	SNP_silent	RNA-dependent RNA polymerase, post-ribosomal frameshift	NSP12b:Y23Y	C13536T
EPI_ISL_464946	13536	C	T	13536	29903	NSP12b	Y23Y	SNP_silent	RNA-dependent RNA polymerase, post-ribosomal frameshift	NSP12b:Y23Y	C13536T
EPI_ISL_465178	13536	C	T	13536	29903	NSP12b	Y23Y	SNP_silent	RNA-dependent RNA polymerase, post-ribosomal frameshift	NSP12b:Y23Y	C13536T
EPI_ISL_465381	13536	C	T	13536	29903	NSP12b	Y23Y	SNP_silent	RNA-dependent RNA polymerase, post-ribosomal frameshift	NSP12b:Y23Y	C13536T
EPI_ISL_465382	13536	C	T	13536	29903	NSP12b	Y23Y	SNP_silent	RNA-dependent RNA polymerase, post-ribosomal frameshift	NSP12b:Y23Y	C13536T
EPI_ISL_465417	13536	C	T	13536	29903	NSP12b	Y23Y	SNP_silent	RNA-dependent RNA polymerase, post-ribosomal frameshift	NSP12b:Y23Y	C13536T
EPI_ISL_465621	13536	C	T	13536	29903	NSP12b	Y23Y	SNP_silent	RNA-dependent RNA polymerase, post-ribosomal frameshift	NSP12b:Y23Y	C13536T
EPI_ISL_465648	13536	C	T	13536	29903	NSP12b	Y23Y	SNP_silent	RNA-dependent RNA polymerase, post-ribosomal frameshift	NSP12b:Y23Y	C13536T
EPI_ISL_465709	13536	C	T	13536	29903	NSP12b	Y23Y	SNP_silent	RNA-dependent RNA polymerase, post-ribosomal frameshift	NSP12b:Y23Y	C13536T
EPI_ISL_465806	13536	C	T	13536	29903	NSP12b	Y23Y	SNP_silent	RNA-dependent RNA polymerase, post-ribosomal frameshift	NSP12b:Y23Y	C13536T
EPI_ISL_465971	13536	C	T	13536	29903	NSP12b	Y23Y	SNP_silent	RNA-dependent RNA polymerase, post-ribosomal frameshift	NSP12b:Y23Y	C13536T
EPI_ISL_466030	13536	C	T	13536	29903	NSP12b	Y23Y	SNP_silent	RNA-dependent RNA polymerase, post-ribosomal frameshift	NSP12b:Y23Y	C13536T
EPI_ISL_466361	13536	C	T	13536	29903	NSP12b	Y23Y	SNP_silent	RNA-dependent RNA polymerase, post-ribosomal frameshift	NSP12b:Y23Y	C13536T
EPI_ISL_467431	13536	C	T	13536	29903	NSP12b	Y23Y	SNP_silent	RNA-dependent RNA polymerase, post-ribosomal frameshift	NSP12b:Y23Y	C13536T
EPI_ISL_467780	13536	C	T	13523	29860	NSP12b	Y23Y	SNP_silent	RNA-dependent RNA polymerase, post-ribosomal frameshift	NSP12b:Y23Y	C13536T
EPI_ISL_468002	13536	C	T	13536	29903	NSP12b	Y23Y	SNP_silent	RNA-dependent RNA polymerase, post-ribosomal frameshift	NSP12b:Y23Y	C13536T
EPI_ISL_468024	13536	C	T	13536	29903	NSP12b	Y23Y	SNP_silent	RNA-dependent RNA polymerase, post-ribosomal frameshift	NSP12b:Y23Y	C13536T
EPI_ISL_468281	13536	C	T	13536	29903	NSP12b	Y23Y	SNP_silent	RNA-dependent RNA polymerase, post-ribosomal frameshift	NSP12b:Y23Y	C13536T
EPI_ISL_469074	13536	C	T	13536	29903	NSP12b	Y23Y	SNP_silent	RNA-dependent RNA polymerase, post-ribosomal frameshift	NSP12b:Y23Y	C13536T
EPI_ISL_469335	13536	C	T	13482	29782	NSP12b	Y23Y	SNP_silent	RNA-dependent RNA polymerase, post-ribosomal frameshift	NSP12b:Y23Y	C13536T
EPI_ISL_469908	13536	C	T	13482	29782	NSP12b	Y23Y	SNP_silent	RNA-dependent RNA polymerase, post-ribosomal frameshift	NSP12b:Y23Y	C13536T
EPI_ISL_470090	13536	C	T	13482	29782	NSP12b	Y23Y	SNP_silent	RNA-dependent RNA polymerase, post-ribosomal frameshift	NSP12b:Y23Y	C13536T
EPI_ISL_470109	13536	C	T	13482	29783	NSP12b	Y23Y	SNP_silent	RNA-dependent RNA polymerase, post-ribosomal frameshift	NSP12b:Y23Y	C13536T
EPI_ISL_470129	13536	C	T	13482	29782	NSP12b	Y23Y	SNP_silent	RNA-dependent RNA polymerase, post-ribosomal frameshift	NSP12b:Y23Y	C13536T
EPI_ISL_470142	13536	C	T	13482	29782	NSP12b	Y23Y	SNP_silent	RNA-dependent RNA polymerase, post-ribosomal frameshift	NSP12b:Y23Y	C13536T
EPI_ISL_470152	13536	C	T	13482	29783	NSP12b	Y23Y	SNP_silent	RNA-dependent RNA polymerase, post-ribosomal frameshift	NSP12b:Y23Y	C13536T
EPI_ISL_470182	13536	C	T	13482	29782	NSP12b	Y23Y	SNP_silent	RNA-dependent RNA polymerase, post-ribosomal frameshift	NSP12b:Y23Y	C13536T
EPI_ISL_470188	13536	C	T	13482	29782	NSP12b	Y23Y	SNP_silent	RNA-dependent RNA polymerase, post-ribosomal frameshift	NSP12b:Y23Y	C13536T
EPI_ISL_470219	13536	C	T	13482	29782	NSP12b	Y23Y	SNP_silent	RNA-dependent RNA polymerase, post-ribosomal frameshift	NSP12b:Y23Y	C13536T
EPI_ISL_470225	13536	C	T	13482	29782	NSP12b	Y23Y	SNP_silent	RNA-dependent RNA polymerase, post-ribosomal frameshift	NSP12b:Y23Y	C13536T
EPI_ISL_470227	13536	C	T	13482	29782	NSP12b	Y23Y	SNP_silent	RNA-dependent RNA polymerase, post-ribosomal frameshift	NSP12b:Y23Y	C13536T
EPI_ISL_470234	13536	C	T	13482	29782	NSP12b	Y23Y	SNP_silent	RNA-dependent RNA polymerase, post-ribosomal frameshift	NSP12b:Y23Y	C13536T
EPI_ISL_470243	13536	C	T	13482	29781	NSP12b	Y23Y	SNP_silent	RNA-dependent RNA polymerase, post-ribosomal frameshift	NSP12b:Y23Y	C13536T
EPI_ISL_470248	13536	C	T	13482	29782	NSP12b	Y23Y	SNP_silent	RNA-dependent RNA polymerase, post-ribosomal frameshift	NSP12b:Y23Y	C13536T
EPI_ISL_470249	13536	C	T	13482	29782	NSP12b	Y23Y	SNP_silent	RNA-dependent RNA polymerase, post-ribosomal frameshift	NSP12b:Y23Y	C13536T
EPI_ISL_470270	13536	C	T	13482	29782	NSP12b	Y23Y	SNP_silent	RNA-dependent RNA polymerase, post-ribosomal frameshift	NSP12b:Y23Y	C13536T
EPI_ISL_470280	13536	C	T	13482	29782	NSP12b	Y23Y	SNP_silent	RNA-dependent RNA polymerase, post-ribosomal frameshift	NSP12b:Y23Y	C13536T
EPI_ISL_470285	13536	C	T	13482	29782	NSP12b	Y23Y	SNP_silent	RNA-dependent RNA polymerase, post-ribosomal frameshift	NSP12b:Y23Y	C13536T
EPI_ISL_470335	13536	C	T	13482	29782	NSP12b	Y23Y	SNP_silent	RNA-dependent RNA polymerase, post-ribosomal frameshift	NSP12b:Y23Y	C13536T
EPI_ISL_470354	13536	C	T	13482	29782	NSP12b	Y23Y	SNP_silent	RNA-dependent RNA polymerase, post-ribosomal frameshift	NSP12b:Y23Y	C13536T
EPI_ISL_470413	13536	C	T	13482	29782	NSP12b	Y23Y	SNP_silent	RNA-dependent RNA polymerase, post-ribosomal frameshift	NSP12b:Y23Y	C13536T
EPI_ISL_470454	13536	C	T	13482	29783	NSP12b	Y23Y	SNP_silent	RNA-dependent RNA polymerase, post-ribosomal frameshift	NSP12b:Y23Y	C13536T
EPI_ISL_470467	13536	C	T	13482	29782	NSP12b	Y23Y	SNP_silent	RNA-dependent RNA polymerase, post-ribosomal frameshift	NSP12b:Y23Y	C13536T
EPI_ISL_470492	13536	C	T	13482	29782	NSP12b	Y23Y	SNP_silent	RNA-dependent RNA polymerase, post-ribosomal frameshift	NSP12b:Y23Y	C13536T
EPI_ISL_470500	13536	C	T	13482	29782	NSP12b	Y23Y	SNP_silent	RNA-dependent RNA polymerase, post-ribosomal frameshift	NSP12b:Y23Y	C13536T
EPI_ISL_470512	13536	C	T	13482	29782	NSP12b	Y23Y	SNP_silent	RNA-dependent RNA polymerase, post-ribosomal frameshift	NSP12b:Y23Y	C13536T
EPI_ISL_470528	13536	C	T	13482	29786	NSP12b	Y23Y	SNP_silent	RNA-dependent RNA polymerase, post-ribosomal frameshift	NSP12b:Y23Y	C13536T
EPI_ISL_470603	13536	C	T	13482	29782	NSP12b	Y23Y	SNP_silent	RNA-dependent RNA polymerase, post-ribosomal frameshift	NSP12b:Y23Y	C13536T
EPI_ISL_470670	13536	C	T	13536	29903	NSP12b	Y23Y	SNP_silent	RNA-dependent RNA polymerase, post-ribosomal frameshift	NSP12b:Y23Y	C13536T
EPI_ISL_470697	13536	C	T	13535	29902	NSP12b	Y23Y	SNP_silent	RNA-dependent RNA polymerase, post-ribosomal frameshift	NSP12b:Y23Y	C13536T
EPI_ISL_470699	13536	C	T	13536	29903	NSP12b	Y23Y	SNP_silent	RNA-dependent RNA polymerase, post-ribosomal frameshift	NSP12b:Y23Y	C13536T
EPI_ISL_470740	13536	C	T	13536	29903	NSP12b	Y23Y	SNP_silent	RNA-dependent RNA polymerase, post-ribosomal frameshift	NSP12b:Y23Y	C13536T
EPI_ISL_471415	13536	C	T	13498	29815	NSP12b	Y23Y	SNP_silent	RNA-dependent RNA polymerase, post-ribosomal frameshift	NSP12b:Y23Y	C13536T
EPI_ISL_472230	13536	C	T	13536	29903	NSP12b	Y23Y	SNP_silent	RNA-dependent RNA polymerase, post-ribosomal frameshift	NSP12b:Y23Y	C13536T
EPI_ISL_472311	13536	C	T	13536	29903	NSP12b	Y23Y	SNP_silent	RNA-dependent RNA polymerase, post-ribosomal frameshift	NSP12b:Y23Y	C13536T
EPI_ISL_472318	13536	C	T	13533	29900	NSP12b	Y23Y	SNP_silent	RNA-dependent RNA polymerase, post-ribosomal frameshift	NSP12b:Y23Y	C13536T
EPI_ISL_472377	13536	C	T	13506	29873	NSP12b	Y23Y	SNP_silent	RNA-dependent RNA polymerase, post-ribosomal frameshift	NSP12b:Y23Y	C13536T
EPI_ISL_472380	13536	C	T	13532	29899	NSP12b	Y23Y	SNP_silent	RNA-dependent RNA polymerase, post-ribosomal frameshift	NSP12b:Y23Y	C13536T
EPI_ISL_472389	13536	C	T	13536	29903	NSP12b	Y23Y	SNP_silent	RNA-dependent RNA polymerase, post-ribosomal frameshift	NSP12b:Y23Y	C13536T
EPI_ISL_472397	13536	C	T	13536	29903	NSP12b	Y23Y	SNP_silent	RNA-dependent RNA polymerase, post-ribosomal frameshift	NSP12b:Y23Y	C13536T
EPI_ISL_472412	13536	C	T	13536	29903	NSP12b	Y23Y	SNP_silent	RNA-dependent RNA polymerase, post-ribosomal frameshift	NSP12b:Y23Y	C13536T
EPI_ISL_472476	13536	C	T	13534	29901	NSP12b	Y23Y	SNP_silent	RNA-dependent RNA polymerase, post-ribosomal frameshift	NSP12b:Y23Y	C13536T
EPI_ISL_472585	13536	C	T	13502	29869	NSP12b	Y23Y	SNP_silent	RNA-dependent RNA polymerase, post-ribosomal frameshift	NSP12b:Y23Y	C13536T
EPI_ISL_473037	13536	C	T	13532	29899	NSP12b	Y23Y	SNP_silent	RNA-dependent RNA polymerase, post-ribosomal frameshift	NSP12b:Y23Y	C13536T
EPI_ISL_473360	13536	C	T	13536	29903	NSP12b	Y23Y	SNP_silent	RNA-dependent RNA polymerase, post-ribosomal frameshift	NSP12b:Y23Y	C13536T
EPI_ISL_473383	13536	C	T	13536	29903	NSP12b	Y23Y	SNP_silent	RNA-dependent RNA polymerase, post-ribosomal frameshift	NSP12b:Y23Y	C13536T
EPI_ISL_473453	13536	C	T	13536	29903	NSP12b	Y23Y	SNP_silent	RNA-dependent RNA polymerase, post-ribosomal frameshift	NSP12b:Y23Y	C13536T
EPI_ISL_473454	13536	C	T	13536	29903	NSP12b	Y23Y	SNP_silent	RNA-dependent RNA polymerase, post-ribosomal frameshift	NSP12b:Y23Y	C13536T
EPI_ISL_473461	13536	C	T	13536	29903	NSP12b	Y23Y	SNP_silent	RNA-dependent RNA polymerase, post-ribosomal frameshift	NSP12b:Y23Y	C13536T
EPI_ISL_473463	13536	C	T	13536	29903	NSP12b	Y23Y	SNP_silent	RNA-dependent RNA polymerase, post-ribosomal frameshift	NSP12b:Y23Y	C13536T
EPI_ISL_473469	13536	C	T	13536	29903	NSP12b	Y23Y	SNP_silent	RNA-dependent RNA polymerase, post-ribosomal frameshift	NSP12b:Y23Y	C13536T
EPI_ISL_473473	13536	C	T	13536	29903	NSP12b	Y23Y	SNP_silent	RNA-dependent RNA polymerase, post-ribosomal frameshift	NSP12b:Y23Y	C13536T
EPI_ISL_473474	13536	C	T	13536	29903	NSP12b	Y23Y	SNP_silent	RNA-dependent RNA polymerase, post-ribosomal frameshift	NSP12b:Y23Y	C13536T
EPI_ISL_473483	13536	C	T	13536	29903	NSP12b	Y23Y	SNP_silent	RNA-dependent RNA polymerase, post-ribosomal frameshift	NSP12b:Y23Y	C13536T
EPI_ISL_473484	13536	C	T	13536	29903	NSP12b	Y23Y	SNP_silent	RNA-dependent RNA polymerase, post-ribosomal frameshift	NSP12b:Y23Y	C13536T
EPI_ISL_473488	13536	C	T	13536	29903	NSP12b	Y23Y	SNP_silent	RNA-dependent RNA polymerase, post-ribosomal frameshift	NSP12b:Y23Y	C13536T
EPI_ISL_473492	13536	C	T	13536	29903	NSP12b	Y23Y	SNP_silent	RNA-dependent RNA polymerase, post-ribosomal frameshift	NSP12b:Y23Y	C13536T
EPI_ISL_473501	13536	C	T	13536	29903	NSP12b	Y23Y	SNP_silent	RNA-dependent RNA polymerase, post-ribosomal frameshift	NSP12b:Y23Y	C13536T
EPI_ISL_473518	13536	C	T	13482	29782	NSP12b	Y23Y	SNP_silent	RNA-dependent RNA polymerase, post-ribosomal frameshift	NSP12b:Y23Y	C13536T
EPI_ISL_473757	13536	C	T	13482	29782	NSP12b	Y23Y	SNP_silent	RNA-dependent RNA polymerase, post-ribosomal frameshift	NSP12b:Y23Y	C13536T
EPI_ISL_474277	13536	C	T	13532	29899	NSP12b	Y23Y	SNP_silent	RNA-dependent RNA polymerase, post-ribosomal frameshift	NSP12b:Y23Y	C13536T
EPI_ISL_474541	13536	C	T	13501	29868	NSP12b	Y23Y	SNP_silent	RNA-dependent RNA polymerase, post-ribosomal frameshift	NSP12b:Y23Y	C13536T
EPI_ISL_474591	13536	C	T	13511	29878	NSP12b	Y23Y	SNP_silent	RNA-dependent RNA polymerase, post-ribosomal frameshift	NSP12b:Y23Y	C13536T
EPI_ISL_474965	13536	C	T	13536	29903	NSP12b	Y23Y	SNP_silent	RNA-dependent RNA polymerase, post-ribosomal frameshift	NSP12b:Y23Y	C13536T
EPI_ISL_427739	13536	C	T	13272	29412	NSP12b	Y23Y	SNP_silent	RNA-dependent RNA polymerase, post-ribosomal frameshift	NSP12b:Y23Y	C13536T
EPI_ISL_459489	13536	C	T	13482	29782	NSP12b	Y23Y	SNP_silent	RNA-dependent RNA polymerase, post-ribosomal frameshift	NSP12b:Y23Y	C13536T
EPI_ISL_454825	13536	C	T	13511	29834	NSP12b	Y23Y	SNP_silent	RNA-dependent RNA polymerase, post-ribosomal frameshift	NSP12b:Y23Y	C13536T
EPI_ISL_464143	13536	C	T	13536	29903	NSP12b	Y23Y	SNP_silent	RNA-dependent RNA polymerase, post-ribosomal frameshift	NSP12b:Y23Y	C13536T
EPI_ISL_429752	13539	G	A	13539	29857	NSP12b	R24R	SNP_silent	RNA-dependent RNA polymerase, post-ribosomal frameshift	NSP12b:R24R	G13539A
EPI_ISL_429768	13541	C	T	13541	29873	NSP12b	A25V	SNP	RNA-dependent RNA polymerase, post-ribosomal frameshift	NSP12b:A25V	C13541T
EPI_ISL_454549	13542	T	C	13542	29903	NSP12b	A25A	SNP_silent	RNA-dependent RNA polymerase, post-ribosomal frameshift	NSP12b:A25A	T13542C
EPI_ISL_470757	13544	.	T	13507	29822	NSP12b	F26	insertion_frameshift	RNA-dependent RNA polymerase, post-ribosomal frameshift	NSP12b:F26	.13544T
EPI_ISL_439318	13545	T	C	13545	29903	NSP12b	F26F	SNP_silent	RNA-dependent RNA polymerase, post-ribosomal frameshift	NSP12b:F26F	T13545C
EPI_ISL_417579	13548	C	T	13548	29903	NSP12b	D27D	SNP_silent	RNA-dependent RNA polymerase, post-ribosomal frameshift	NSP12b:D27D	C13548T
EPI_ISL_422507	13548	C	T	13484	29694	NSP12b	D27D	SNP_silent	RNA-dependent RNA polymerase, post-ribosomal frameshift	NSP12b:D27D	C13548T
EPI_ISL_424388	13548	C	T	13548	29903	NSP12b	D27D	SNP_silent	RNA-dependent RNA polymerase, post-ribosomal frameshift	NSP12b:D27D	C13548T
EPI_ISL_424501	13548	C	T	13548	29903	NSP12b	D27D	SNP_silent	RNA-dependent RNA polymerase, post-ribosomal frameshift	NSP12b:D27D	C13548T
EPI_ISL_440784	13548	C	T	13494	29812	NSP12b	D27D	SNP_silent	RNA-dependent RNA polymerase, post-ribosomal frameshift	NSP12b:D27D	C13548T
EPI_ISL_442758	13548	C	T	13485	29742	NSP12b	D27D	SNP_silent	RNA-dependent RNA polymerase, post-ribosomal frameshift	NSP12b:D27D	C13548T
EPI_ISL_458410	13548	C	T	13485	29742	NSP12b	D27D	SNP_silent	RNA-dependent RNA polymerase, post-ribosomal frameshift	NSP12b:D27D	C13548T
EPI_ISL_465583	13548	C	T	13548	29903	NSP12b	D27D	SNP_silent	RNA-dependent RNA polymerase, post-ribosomal frameshift	NSP12b:D27D	C13548T
EPI_ISL_465589	13548	C	T	13548	29903	NSP12b	D27D	SNP_silent	RNA-dependent RNA polymerase, post-ribosomal frameshift	NSP12b:D27D	C13548T
EPI_ISL_469658	13548	C	T	13494	29782	NSP12b	D27D	SNP_silent	RNA-dependent RNA polymerase, post-ribosomal frameshift	NSP12b:D27D	C13548T
EPI_ISL_421665	13548	C	T	13535	29890	NSP12b	D27D	SNP_silent	RNA-dependent RNA polymerase, post-ribosomal frameshift	NSP12b:D27D	C13548T
EPI_ISL_458468	13551	C	T	13497	29782	NSP12b	I28I	SNP_silent	RNA-dependent RNA polymerase, post-ribosomal frameshift	NSP12b:I28I	C13551T
EPI_ISL_459080	13551	C	T	13497	29782	NSP12b	I28I	SNP_silent	RNA-dependent RNA polymerase, post-ribosomal frameshift	NSP12b:I28I	C13551T
EPI_ISL_468439	13551	C	T	13455	29761	NSP12b	I28I	SNP_silent	RNA-dependent RNA polymerase, post-ribosomal frameshift	NSP12b:I28I	C13551T
EPI_ISL_468441	13551	C	T	13489	29818	NSP12b	I28I	SNP_silent	RNA-dependent RNA polymerase, post-ribosomal frameshift	NSP12b:I28I	C13551T
EPI_ISL_468443	13551	C	T	13489	29805	NSP12b	I28I	SNP_silent	RNA-dependent RNA polymerase, post-ribosomal frameshift	NSP12b:I28I	C13551T
EPI_ISL_468445	13551	C	T	13489	29841	NSP12b	I28I	SNP_silent	RNA-dependent RNA polymerase, post-ribosomal frameshift	NSP12b:I28I	C13551T
EPI_ISL_470015	13551	C	T	13497	29782	NSP12b	I28I	SNP_silent	RNA-dependent RNA polymerase, post-ribosomal frameshift	NSP12b:I28I	C13551T
EPI_ISL_440206	13551	C	T	13497	29793	NSP12b	I28I	SNP_silent	RNA-dependent RNA polymerase, post-ribosomal frameshift	NSP12b:I28I	C13551T
EPI_ISL_440648	13551	C	T	13497	29845	NSP12b	I28I	SNP_silent	RNA-dependent RNA polymerase, post-ribosomal frameshift	NSP12b:I28I	C13551T
EPI_ISL_443739	13551	C	T	13497	29811	NSP12b	I28I	SNP_silent	RNA-dependent RNA polymerase, post-ribosomal frameshift	NSP12b:I28I	C13551T
EPI_ISL_443778	13551	C	T	13497	29812	NSP12b	I28I	SNP_silent	RNA-dependent RNA polymerase, post-ribosomal frameshift	NSP12b:I28I	C13551T
EPI_ISL_471426	13551	C	T	13551	29903	NSP12b	I28I	SNP_silent	RNA-dependent RNA polymerase, post-ribosomal frameshift	NSP12b:I28I	C13551T
EPI_ISL_423183	13551	C	T	13551	29903	NSP12b	I28I	SNP_silent	RNA-dependent RNA polymerase, post-ribosomal frameshift	NSP12b:I28I	C13551T
EPI_ISL_429234	13552	T	G	13552	29900	NSP12b	Y29D	SNP	RNA-dependent RNA polymerase, post-ribosomal frameshift	NSP12b:Y29D	T13552G
EPI_ISL_440806	13552	T	C	13498	29812	NSP12b	Y29H	SNP	RNA-dependent RNA polymerase, post-ribosomal frameshift	NSP12b:Y29H	T13552C
EPI_ISL_440808	13552	T	C	13548	29832	NSP12b	Y29H	SNP	RNA-dependent RNA polymerase, post-ribosomal frameshift	NSP12b:Y29H	T13552C
EPI_ISL_442660	13552	T	C	13498	29812	NSP12b	Y29H	SNP	RNA-dependent RNA polymerase, post-ribosomal frameshift	NSP12b:Y29H	T13552C
EPI_ISL_443805	13552	T	C	13498	29782	NSP12b	Y29H	SNP	RNA-dependent RNA polymerase, post-ribosomal frameshift	NSP12b:Y29H	T13552C
EPI_ISL_443838	13552	T	C	13498	29812	NSP12b	Y29H	SNP	RNA-dependent RNA polymerase, post-ribosomal frameshift	NSP12b:Y29H	T13552C
EPI_ISL_443847	13552	T	C	13498	29782	NSP12b	Y29H	SNP	RNA-dependent RNA polymerase, post-ribosomal frameshift	NSP12b:Y29H	T13552C
EPI_ISL_443962	13552	T	C	13498	29782	NSP12b	Y29H	SNP	RNA-dependent RNA polymerase, post-ribosomal frameshift	NSP12b:Y29H	T13552C
EPI_ISL_458325	13552	T	C	13498	29782	NSP12b	Y29H	SNP	RNA-dependent RNA polymerase, post-ribosomal frameshift	NSP12b:Y29H	T13552C
EPI_ISL_458377	13552	T	C	13498	29782	NSP12b	Y29H	SNP	RNA-dependent RNA polymerase, post-ribosomal frameshift	NSP12b:Y29H	T13552C
EPI_ISL_458405	13552	T	C	13498	29782	NSP12b	Y29H	SNP	RNA-dependent RNA polymerase, post-ribosomal frameshift	NSP12b:Y29H	T13552C
EPI_ISL_458829	13552	T	C	13498	29782	NSP12b	Y29H	SNP	RNA-dependent RNA polymerase, post-ribosomal frameshift	NSP12b:Y29H	T13552C
EPI_ISL_458944	13552	T	C	13498	29782	NSP12b	Y29H	SNP	RNA-dependent RNA polymerase, post-ribosomal frameshift	NSP12b:Y29H	T13552C
EPI_ISL_458945	13552	T	C	13498	29782	NSP12b	Y29H	SNP	RNA-dependent RNA polymerase, post-ribosomal frameshift	NSP12b:Y29H	T13552C
EPI_ISL_458948	13552	T	C	13498	29782	NSP12b	Y29H	SNP	RNA-dependent RNA polymerase, post-ribosomal frameshift	NSP12b:Y29H	T13552C
EPI_ISL_458950	13552	T	C	13498	29782	NSP12b	Y29H	SNP	RNA-dependent RNA polymerase, post-ribosomal frameshift	NSP12b:Y29H	T13552C
EPI_ISL_458986	13552	T	C	13498	29782	NSP12b	Y29H	SNP	RNA-dependent RNA polymerase, post-ribosomal frameshift	NSP12b:Y29H	T13552C
EPI_ISL_459071	13552	T	C	13498	29782	NSP12b	Y29H	SNP	RNA-dependent RNA polymerase, post-ribosomal frameshift	NSP12b:Y29H	T13552C
EPI_ISL_430931	13554	C	T	13538	29846	NSP12b	Y29Y	SNP_silent	RNA-dependent RNA polymerase, post-ribosomal frameshift	NSP12b:Y29Y	C13554T
EPI_ISL_439752	13554	C	T	13554	29903	NSP12b	Y29Y	SNP_silent	RNA-dependent RNA polymerase, post-ribosomal frameshift	NSP12b:Y29Y	C13554T
EPI_ISL_448713	13554	C	T	13554	29903	NSP12b	Y29Y	SNP_silent	RNA-dependent RNA polymerase, post-ribosomal frameshift	NSP12b:Y29Y	C13554T
EPI_ISL_449857	13554	C	T	13554	29903	NSP12b	Y29Y	SNP_silent	RNA-dependent RNA polymerase, post-ribosomal frameshift	NSP12b:Y29Y	C13554T
EPI_ISL_449858	13554	C	T	13554	29903	NSP12b	Y29Y	SNP_silent	RNA-dependent RNA polymerase, post-ribosomal frameshift	NSP12b:Y29Y	C13554T
EPI_ISL_449859	13554	C	T	13554	29903	NSP12b	Y29Y	SNP_silent	RNA-dependent RNA polymerase, post-ribosomal frameshift	NSP12b:Y29Y	C13554T
EPI_ISL_449862	13554	C	T	13554	29903	NSP12b	Y29Y	SNP_silent	RNA-dependent RNA polymerase, post-ribosomal frameshift	NSP12b:Y29Y	C13554T
EPI_ISL_468222	13554	C	T	13554	29903	NSP12b	Y29Y	SNP_silent	RNA-dependent RNA polymerase, post-ribosomal frameshift	NSP12b:Y29Y	C13554T
EPI_ISL_471902	13554	C	T	13554	29902	NSP12b	Y29Y	SNP_silent	RNA-dependent RNA polymerase, post-ribosomal frameshift	NSP12b:Y29Y	C13554T
EPI_ISL_421254	13555	A	T	13531	29867	NSP12b	N30Y	SNP	RNA-dependent RNA polymerase, post-ribosomal frameshift	NSP12b:N30Y	A13555T
EPI_ISL_456414	13558	G	A	13558	29903	NSP12b	D31N	SNP	RNA-dependent RNA polymerase, post-ribosomal frameshift	NSP12b:D31N	G13558A
EPI_ISL_448005	13559	A	G	13559	29903	NSP12b	D31G	SNP	RNA-dependent RNA polymerase, post-ribosomal frameshift	NSP12b:D31G	A13559G
EPI_ISL_459226	13559	A	G	13505	29764	NSP12b	D31G	SNP	RNA-dependent RNA polymerase, post-ribosomal frameshift	NSP12b:D31G	A13559G
EPI_ISL_422567	13564	G	T	13510	29775	NSP12b	V33L	SNP	RNA-dependent RNA polymerase, post-ribosomal frameshift	NSP12b:V33L	G13564T
EPI_ISL_443095	13564	G	T	13510	29782	NSP12b	V33L	SNP	RNA-dependent RNA polymerase, post-ribosomal frameshift	NSP12b:V33L	G13564T
EPI_ISL_454765	13564	G	T	13531	29829	NSP12b	V33L	SNP	RNA-dependent RNA polymerase, post-ribosomal frameshift	NSP12b:V33L	G13564T
EPI_ISL_435059	13567	G	A	13566	29902	NSP12b	A34T	SNP	RNA-dependent RNA polymerase, post-ribosomal frameshift	NSP12b:A34T	G13567A
EPI_ISL_451853	13567	G	A	13567	29903	NSP12b	A34T	SNP	RNA-dependent RNA polymerase, post-ribosomal frameshift	NSP12b:A34T	G13567A
EPI_ISL_425240	13568	C	T	13568	29903	NSP12b	A34V	SNP	RNA-dependent RNA polymerase, post-ribosomal frameshift	NSP12b:A34V	C13568T
EPI_ISL_427129	13568	C	T	13568	29903	NSP12b	A34V	SNP	RNA-dependent RNA polymerase, post-ribosomal frameshift	NSP12b:A34V	C13568T
EPI_ISL_429136	13568	C	T	13568	29903	NSP12b	A34V	SNP	RNA-dependent RNA polymerase, post-ribosomal frameshift	NSP12b:A34V	C13568T
EPI_ISL_429139	13568	C	T	13568	29903	NSP12b	A34V	SNP	RNA-dependent RNA polymerase, post-ribosomal frameshift	NSP12b:A34V	C13568T
EPI_ISL_429141	13568	C	T	13568	29903	NSP12b	A34V	SNP	RNA-dependent RNA polymerase, post-ribosomal frameshift	NSP12b:A34V	C13568T
EPI_ISL_429142	13568	C	T	13568	29903	NSP12b	A34V	SNP	RNA-dependent RNA polymerase, post-ribosomal frameshift	NSP12b:A34V	C13568T
EPI_ISL_429144	13568	C	T	13568	29903	NSP12b	A34V	SNP	RNA-dependent RNA polymerase, post-ribosomal frameshift	NSP12b:A34V	C13568T
EPI_ISL_429145	13568	C	T	13568	29903	NSP12b	A34V	SNP	RNA-dependent RNA polymerase, post-ribosomal frameshift	NSP12b:A34V	C13568T
EPI_ISL_429146	13568	C	T	13568	29903	NSP12b	A34V	SNP	RNA-dependent RNA polymerase, post-ribosomal frameshift	NSP12b:A34V	C13568T
EPI_ISL_429147	13568	C	T	13568	29903	NSP12b	A34V	SNP	RNA-dependent RNA polymerase, post-ribosomal frameshift	NSP12b:A34V	C13568T
EPI_ISL_429148	13568	C	T	13568	29903	NSP12b	A34V	SNP	RNA-dependent RNA polymerase, post-ribosomal frameshift	NSP12b:A34V	C13568T
EPI_ISL_429150	13568	C	T	13568	29903	NSP12b	A34V	SNP	RNA-dependent RNA polymerase, post-ribosomal frameshift	NSP12b:A34V	C13568T
EPI_ISL_429151	13568	C	T	13568	29903	NSP12b	A34V	SNP	RNA-dependent RNA polymerase, post-ribosomal frameshift	NSP12b:A34V	C13568T
EPI_ISL_429153	13568	C	T	13568	29903	NSP12b	A34V	SNP	RNA-dependent RNA polymerase, post-ribosomal frameshift	NSP12b:A34V	C13568T
EPI_ISL_429154	13568	C	T	13568	29903	NSP12b	A34V	SNP	RNA-dependent RNA polymerase, post-ribosomal frameshift	NSP12b:A34V	C13568T
EPI_ISL_429156	13568	C	T	13568	29903	NSP12b	A34V	SNP	RNA-dependent RNA polymerase, post-ribosomal frameshift	NSP12b:A34V	C13568T
EPI_ISL_429158	13568	C	T	13568	29903	NSP12b	A34V	SNP	RNA-dependent RNA polymerase, post-ribosomal frameshift	NSP12b:A34V	C13568T
EPI_ISL_430860	13568	C	T	13568	29903	NSP12b	A34V	SNP	RNA-dependent RNA polymerase, post-ribosomal frameshift	NSP12b:A34V	C13568T
EPI_ISL_430861	13568	C	T	13568	29903	NSP12b	A34V	SNP	RNA-dependent RNA polymerase, post-ribosomal frameshift	NSP12b:A34V	C13568T
EPI_ISL_434930	13568	C	T	13568	29903	NSP12b	A34V	SNP	RNA-dependent RNA polymerase, post-ribosomal frameshift	NSP12b:A34V	C13568T
EPI_ISL_435136	13568	C	T	13568	29903	NSP12b	A34V	SNP	RNA-dependent RNA polymerase, post-ribosomal frameshift	NSP12b:A34V	C13568T
EPI_ISL_438661	13568	C	T	13568	29903	NSP12b	A34V	SNP	RNA-dependent RNA polymerase, post-ribosomal frameshift	NSP12b:A34V	C13568T
EPI_ISL_439884	13568	C	T	13514	29812	NSP12b	A34V	SNP	RNA-dependent RNA polymerase, post-ribosomal frameshift	NSP12b:A34V	C13568T
EPI_ISL_441092	13568	C	T	13514	29782	NSP12b	A34V	SNP	RNA-dependent RNA polymerase, post-ribosomal frameshift	NSP12b:A34V	C13568T
EPI_ISL_441679	13568	C	T	13514	29782	NSP12b	A34V	SNP	RNA-dependent RNA polymerase, post-ribosomal frameshift	NSP12b:A34V	C13568T
EPI_ISL_442299	13568	C	T	13514	29849	NSP12b	A34V	SNP	RNA-dependent RNA polymerase, post-ribosomal frameshift	NSP12b:A34V	C13568T
EPI_ISL_442816	13568	C	T	13514	29812	NSP12b	A34V	SNP	RNA-dependent RNA polymerase, post-ribosomal frameshift	NSP12b:A34V	C13568T
EPI_ISL_442817	13568	C	T	13514	29812	NSP12b	A34V	SNP	RNA-dependent RNA polymerase, post-ribosomal frameshift	NSP12b:A34V	C13568T
EPI_ISL_442906	13568	C	T	13514	29849	NSP12b	A34V	SNP	RNA-dependent RNA polymerase, post-ribosomal frameshift	NSP12b:A34V	C13568T
EPI_ISL_442983	13568	C	T	13514	29782	NSP12b	A34V	SNP	RNA-dependent RNA polymerase, post-ribosomal frameshift	NSP12b:A34V	C13568T
EPI_ISL_442989	13568	C	T	13514	29812	NSP12b	A34V	SNP	RNA-dependent RNA polymerase, post-ribosomal frameshift	NSP12b:A34V	C13568T
EPI_ISL_443038	13568	C	T	13514	29812	NSP12b	A34V	SNP	RNA-dependent RNA polymerase, post-ribosomal frameshift	NSP12b:A34V	C13568T
EPI_ISL_443331	13568	C	T	13514	29849	NSP12b	A34V	SNP	RNA-dependent RNA polymerase, post-ribosomal frameshift	NSP12b:A34V	C13568T
EPI_ISL_443337	13568	C	T	13514	29849	NSP12b	A34V	SNP	RNA-dependent RNA polymerase, post-ribosomal frameshift	NSP12b:A34V	C13568T
EPI_ISL_443350	13568	C	T	13514	29849	NSP12b	A34V	SNP	RNA-dependent RNA polymerase, post-ribosomal frameshift	NSP12b:A34V	C13568T
EPI_ISL_443388	13568	C	T	13514	29846	NSP12b	A34V	SNP	RNA-dependent RNA polymerase, post-ribosomal frameshift	NSP12b:A34V	C13568T
EPI_ISL_443406	13568	C	T	13514	29849	NSP12b	A34V	SNP	RNA-dependent RNA polymerase, post-ribosomal frameshift	NSP12b:A34V	C13568T
EPI_ISL_443501	13568	C	T	13514	29812	NSP12b	A34V	SNP	RNA-dependent RNA polymerase, post-ribosomal frameshift	NSP12b:A34V	C13568T
EPI_ISL_443562	13568	C	T	13514	29812	NSP12b	A34V	SNP	RNA-dependent RNA polymerase, post-ribosomal frameshift	NSP12b:A34V	C13568T
EPI_ISL_443623	13568	C	T	13514	29849	NSP12b	A34V	SNP	RNA-dependent RNA polymerase, post-ribosomal frameshift	NSP12b:A34V	C13568T
EPI_ISL_443657	13568	C	T	13514	29782	NSP12b	A34V	SNP	RNA-dependent RNA polymerase, post-ribosomal frameshift	NSP12b:A34V	C13568T
EPI_ISL_443661	13568	C	T	13514	29849	NSP12b	A34V	SNP	RNA-dependent RNA polymerase, post-ribosomal frameshift	NSP12b:A34V	C13568T
EPI_ISL_443670	13568	C	T	13566	29864	NSP12b	A34V	SNP	RNA-dependent RNA polymerase, post-ribosomal frameshift	NSP12b:A34V	C13568T
EPI_ISL_443673	13568	C	T	13514	29782	NSP12b	A34V	SNP	RNA-dependent RNA polymerase, post-ribosomal frameshift	NSP12b:A34V	C13568T
EPI_ISL_443680	13568	C	T	13514	29812	NSP12b	A34V	SNP	RNA-dependent RNA polymerase, post-ribosomal frameshift	NSP12b:A34V	C13568T
EPI_ISL_444335	13568	C	T	13568	29903	NSP12b	A34V	SNP	RNA-dependent RNA polymerase, post-ribosomal frameshift	NSP12b:A34V	C13568T
EPI_ISL_448022	13568	C	T	13568	29903	NSP12b	A34V	SNP	RNA-dependent RNA polymerase, post-ribosomal frameshift	NSP12b:A34V	C13568T
EPI_ISL_455841	13568	C	T	13568	29903	NSP12b	A34V	SNP	RNA-dependent RNA polymerase, post-ribosomal frameshift	NSP12b:A34V	C13568T
EPI_ISL_456676	13568	C	T	13568	29903	NSP12b	A34V	SNP	RNA-dependent RNA polymerase, post-ribosomal frameshift	NSP12b:A34V	C13568T
EPI_ISL_459171	13568	C	T	13514	29782	NSP12b	A34V	SNP	RNA-dependent RNA polymerase, post-ribosomal frameshift	NSP12b:A34V	C13568T
EPI_ISL_459224	13568	C	T	13514	29782	NSP12b	A34V	SNP	RNA-dependent RNA polymerase, post-ribosomal frameshift	NSP12b:A34V	C13568T
EPI_ISL_459247	13568	C	T	13514	29783	NSP12b	A34V	SNP	RNA-dependent RNA polymerase, post-ribosomal frameshift	NSP12b:A34V	C13568T
EPI_ISL_470125	13568	C	T	13514	29782	NSP12b	A34V	SNP	RNA-dependent RNA polymerase, post-ribosomal frameshift	NSP12b:A34V	C13568T
EPI_ISL_470298	13568	C	T	13514	29782	NSP12b	A34V	SNP	RNA-dependent RNA polymerase, post-ribosomal frameshift	NSP12b:A34V	C13568T
EPI_ISL_470299	13568	C	T	13514	29782	NSP12b	A34V	SNP	RNA-dependent RNA polymerase, post-ribosomal frameshift	NSP12b:A34V	C13568T
EPI_ISL_470359	13568	C	T	13514	29782	NSP12b	A34V	SNP	RNA-dependent RNA polymerase, post-ribosomal frameshift	NSP12b:A34V	C13568T
EPI_ISL_470444	13568	C	T	13514	29778	NSP12b	A34V	SNP	RNA-dependent RNA polymerase, post-ribosomal frameshift	NSP12b:A34V	C13568T
EPI_ISL_471233	13568	C	T	13514	29782	NSP12b	A34V	SNP	RNA-dependent RNA polymerase, post-ribosomal frameshift	NSP12b:A34V	C13568T
EPI_ISL_435393	13569	T	A	13563	29897	NSP12b	A34A	SNP_silent	RNA-dependent RNA polymerase, post-ribosomal frameshift	NSP12b:A34A	T13569A
EPI_ISL_458169	13570	G	T	13516	29782	NSP12b	G35C	SNP	RNA-dependent RNA polymerase, post-ribosomal frameshift	NSP12b:G35C	G13570T
EPI_ISL_426678	13571	G	T	13533	29863	NSP12b	G35V	SNP	RNA-dependent RNA polymerase, post-ribosomal frameshift	NSP12b:G35V	G13571T
EPI_ISL_426703	13571	G	T	13571	29903	NSP12b	G35V	SNP	RNA-dependent RNA polymerase, post-ribosomal frameshift	NSP12b:G35V	G13571T
EPI_ISL_426705	13571	G	T	13567	29899	NSP12b	G35V	SNP	RNA-dependent RNA polymerase, post-ribosomal frameshift	NSP12b:G35V	G13571T
EPI_ISL_426787	13571	G	T	13570	29902	NSP12b	G35V	SNP	RNA-dependent RNA polymerase, post-ribosomal frameshift	NSP12b:G35V	G13571T
EPI_ISL_426790	13571	G	T	13571	29903	NSP12b	G35V	SNP	RNA-dependent RNA polymerase, post-ribosomal frameshift	NSP12b:G35V	G13571T
EPI_ISL_426830	13571	G	T	13571	29903	NSP12b	G35V	SNP	RNA-dependent RNA polymerase, post-ribosomal frameshift	NSP12b:G35V	G13571T
EPI_ISL_461621	13571	G	T	13571	29903	NSP12b	G35V	SNP	RNA-dependent RNA polymerase, post-ribosomal frameshift	NSP12b:G35V	G13571T
EPI_ISL_463386	13571	G	T	13571	29903	NSP12b	G35V	SNP	RNA-dependent RNA polymerase, post-ribosomal frameshift	NSP12b:G35V	G13571T
EPI_ISL_473275	13571	G	T	13539	29869	NSP12b	G35V	SNP	RNA-dependent RNA polymerase, post-ribosomal frameshift	NSP12b:G35V	G13571T
EPI_ISL_469815	13571	G	T	13517	29782	NSP12b	G35V	SNP	RNA-dependent RNA polymerase, post-ribosomal frameshift	NSP12b:G35V	G13571T
EPI_ISL_470064	13571	G	T	13517	29782	NSP12b	G35V	SNP	RNA-dependent RNA polymerase, post-ribosomal frameshift	NSP12b:G35V	G13571T
EPI_ISL_426788	13571	G	T	13571	29903	NSP12b	G35V	SNP	RNA-dependent RNA polymerase, post-ribosomal frameshift	NSP12b:G35V	G13571T
EPI_ISL_411952	13571	G	T	13571	29891	NSP12b	G35V	SNP	RNA-dependent RNA polymerase, post-ribosomal frameshift	NSP12b:G35V	G13571T
EPI_ISL_424284	13571	G	T	13499	29792	NSP12b	G35V	SNP	RNA-dependent RNA polymerase, post-ribosomal frameshift	NSP12b:G35V	G13571T
EPI_ISL_444076	13572	T	C	13562	29893	NSP12b	G35G	SNP_silent	RNA-dependent RNA polymerase, post-ribosomal frameshift	NSP12b:G35G	T13572C
EPI_ISL_455454	13572	T	G	13534	29816	NSP12b	G35G	SNP_silent	RNA-dependent RNA polymerase, post-ribosomal frameshift	NSP12b:G35G	T13572G
EPI_ISL_421763	13573	TT	AA	13573	29853	NSP12b	F36N	SNP	RNA-dependent RNA polymerase, post-ribosomal frameshift	NSP12b:F36N	TT13573AA
EPI_ISL_437094	13575	TG	CT	13575	29903	NSP12b	A37S	SNP	RNA-dependent RNA polymerase, post-ribosomal frameshift	NSP12b:A37S	TG13575CT
EPI_ISL_450520	13575	TG	CT	13575	29903	NSP12b	A37S	SNP	RNA-dependent RNA polymerase, post-ribosomal frameshift	NSP12b:A37S	TG13575CT
EPI_ISL_450521	13575	TG	CT	13575	29903	NSP12b	A37S	SNP	RNA-dependent RNA polymerase, post-ribosomal frameshift	NSP12b:A37S	TG13575CT
EPI_ISL_450522	13575	TG	CT	13575	29903	NSP12b	A37S	SNP	RNA-dependent RNA polymerase, post-ribosomal frameshift	NSP12b:A37S	TG13575CT
EPI_ISL_441740	13576	G	T	13522	29849	NSP12b	A37S	SNP	RNA-dependent RNA polymerase, post-ribosomal frameshift	NSP12b:A37S	G13576T
EPI_ISL_458581	13576	G	T	13522	29782	NSP12b	A37S	SNP	RNA-dependent RNA polymerase, post-ribosomal frameshift	NSP12b:A37S	G13576T
EPI_ISL_434557	13582	T	A	13582	29871	NSP12b	F39I	SNP	RNA-dependent RNA polymerase, post-ribosomal frameshift	NSP12b:F39I	T13582A
EPI_ISL_432241	13584	C	T	13584	29903	NSP12b	F39F	SNP_silent	RNA-dependent RNA polymerase, post-ribosomal frameshift	NSP12b:F39F	C13584T
EPI_ISL_432251	13584	C	T	13579	29898	NSP12b	F39F	SNP_silent	RNA-dependent RNA polymerase, post-ribosomal frameshift	NSP12b:F39F	C13584T
EPI_ISL_432345	13584	C	T	13582	29901	NSP12b	F39F	SNP_silent	RNA-dependent RNA polymerase, post-ribosomal frameshift	NSP12b:F39F	C13584T
EPI_ISL_445316	13584	C	T	13537	29796	NSP12b	F39F	SNP_silent	RNA-dependent RNA polymerase, post-ribosomal frameshift	NSP12b:F39F	C13584T
EPI_ISL_445545	13584	C	T	13582	29901	NSP12b	F39F	SNP_silent	RNA-dependent RNA polymerase, post-ribosomal frameshift	NSP12b:F39F	C13584T
EPI_ISL_445551	13584	C	T	13582	29901	NSP12b	F39F	SNP_silent	RNA-dependent RNA polymerase, post-ribosomal frameshift	NSP12b:F39F	C13584T
EPI_ISL_445638	13584	C	T	13582	29901	NSP12b	F39F	SNP_silent	RNA-dependent RNA polymerase, post-ribosomal frameshift	NSP12b:F39F	C13584T
EPI_ISL_445639	13584	C	T	13584	29903	NSP12b	F39F	SNP_silent	RNA-dependent RNA polymerase, post-ribosomal frameshift	NSP12b:F39F	C13584T
EPI_ISL_445760	13584	C	T	13583	29902	NSP12b	F39F	SNP_silent	RNA-dependent RNA polymerase, post-ribosomal frameshift	NSP12b:F39F	C13584T
EPI_ISL_445766	13584	C	T	13573	29892	NSP12b	F39F	SNP_silent	RNA-dependent RNA polymerase, post-ribosomal frameshift	NSP12b:F39F	C13584T
EPI_ISL_445782	13584	C	T	13584	29903	NSP12b	F39F	SNP_silent	RNA-dependent RNA polymerase, post-ribosomal frameshift	NSP12b:F39F	C13584T
EPI_ISL_446052	13584	C	T	13582	29901	NSP12b	F39F	SNP_silent	RNA-dependent RNA polymerase, post-ribosomal frameshift	NSP12b:F39F	C13584T
EPI_ISL_446197	13584	C	T	13546	29865	NSP12b	F39F	SNP_silent	RNA-dependent RNA polymerase, post-ribosomal frameshift	NSP12b:F39F	C13584T
EPI_ISL_446217	13584	C	T	13547	29866	NSP12b	F39F	SNP_silent	RNA-dependent RNA polymerase, post-ribosomal frameshift	NSP12b:F39F	C13584T
EPI_ISL_446288	13584	C	T	13581	29900	NSP12b	F39F	SNP_silent	RNA-dependent RNA polymerase, post-ribosomal frameshift	NSP12b:F39F	C13584T
EPI_ISL_446604	13584	C	T	13575	29894	NSP12b	F39F	SNP_silent	RNA-dependent RNA polymerase, post-ribosomal frameshift	NSP12b:F39F	C13584T
EPI_ISL_446777	13584	C	T	13546	29865	NSP12b	F39F	SNP_silent	RNA-dependent RNA polymerase, post-ribosomal frameshift	NSP12b:F39F	C13584T
EPI_ISL_446844	13584	C	T	13577	29896	NSP12b	F39F	SNP_silent	RNA-dependent RNA polymerase, post-ribosomal frameshift	NSP12b:F39F	C13584T
EPI_ISL_446887	13584	C	T	13580	29899	NSP12b	F39F	SNP_silent	RNA-dependent RNA polymerase, post-ribosomal frameshift	NSP12b:F39F	C13584T
EPI_ISL_446965	13584	C	T	13553	29872	NSP12b	F39F	SNP_silent	RNA-dependent RNA polymerase, post-ribosomal frameshift	NSP12b:F39F	C13584T
EPI_ISL_470302	13584	C	T	13530	29782	NSP12b	F39F	SNP_silent	RNA-dependent RNA polymerase, post-ribosomal frameshift	NSP12b:F39F	C13584T
EPI_ISL_472439	13584	C	T	13547	29866	NSP12b	F39F	SNP_silent	RNA-dependent RNA polymerase, post-ribosomal frameshift	NSP12b:F39F	C13584T
EPI_ISL_472686	13584	C	T	13549	29868	NSP12b	F39F	SNP_silent	RNA-dependent RNA polymerase, post-ribosomal frameshift	NSP12b:F39F	C13584T
EPI_ISL_473959	13584	C	T	13554	29866	NSP12b	F39F	SNP_silent	RNA-dependent RNA polymerase, post-ribosomal frameshift	NSP12b:F39F	C13584T
EPI_ISL_474119	13584	C	T	13568	29887	NSP12b	F39F	SNP_silent	RNA-dependent RNA polymerase, post-ribosomal frameshift	NSP12b:F39F	C13584T
EPI_ISL_474266	13584	C	T	13548	29867	NSP12b	F39F	SNP_silent	RNA-dependent RNA polymerase, post-ribosomal frameshift	NSP12b:F39F	C13584T
EPI_ISL_474327	13584	C	T	13546	29865	NSP12b	F39F	SNP_silent	RNA-dependent RNA polymerase, post-ribosomal frameshift	NSP12b:F39F	C13584T
EPI_ISL_474520	13584	C	T	13546	29865	NSP12b	F39F	SNP_silent	RNA-dependent RNA polymerase, post-ribosomal frameshift	NSP12b:F39F	C13584T
EPI_ISL_474549	13584	C	T	13580	29900	NSP12b	F39F	SNP_silent	RNA-dependent RNA polymerase, post-ribosomal frameshift	NSP12b:F39F	C13584T
EPI_ISL_474621	13584	C	T	13548	29867	NSP12b	F39F	SNP_silent	RNA-dependent RNA polymerase, post-ribosomal frameshift	NSP12b:F39F	C13584T
EPI_ISL_474704	13584	C	T	13584	29903	NSP12b	F39F	SNP_silent	RNA-dependent RNA polymerase, post-ribosomal frameshift	NSP12b:F39F	C13584T
EPI_ISL_455664	13585	C	T	13585	29903	NSP12b	F39F	SNP_silent	RNA-dependent RNA polymerase, post-ribosomal frameshift	NSP12b:F39F	C13585T
EPI_ISL_455667	13585	C	T	13585	29903	NSP12b	F39F	SNP_silent	RNA-dependent RNA polymerase, post-ribosomal frameshift	NSP12b:F39F	C13585T
EPI_ISL_455673	13585	C	T	13585	29903	NSP12b	F39F	SNP_silent	RNA-dependent RNA polymerase, post-ribosomal frameshift	NSP12b:F39F	C13585T
EPI_ISL_455674	13585	C	T	13585	29903	NSP12b	F39F	SNP_silent	RNA-dependent RNA polymerase, post-ribosomal frameshift	NSP12b:F39F	C13585T
EPI_ISL_455676	13585	C	T	13585	29903	NSP12b	F39F	SNP_silent	RNA-dependent RNA polymerase, post-ribosomal frameshift	NSP12b:F39F	C13585T
EPI_ISL_430432	13585	C	A	13585	29903	NSP12b	L40I	SNP	RNA-dependent RNA polymerase, post-ribosomal frameshift	NSP12b:L40I	C13585A
EPI_ISL_438397	13585	C	T	13531	29782	NSP12b	F39F	SNP_silent	RNA-dependent RNA polymerase, post-ribosomal frameshift	NSP12b:F39F	C13585T
EPI_ISL_439511	13592	C	T	13538	29824	NSP12b	T42I	SNP	RNA-dependent RNA polymerase, post-ribosomal frameshift	NSP12b:T42I	C13592T
EPI_ISL_424181	13592	C	T	13466	29777	NSP12b	T42I	SNP	RNA-dependent RNA polymerase, post-ribosomal frameshift	NSP12b:T42I	C13592T
EPI_ISL_445707	13599	T	C	13598	29901	NSP12b	C44C	SNP_silent	RNA-dependent RNA polymerase, post-ribosomal frameshift	NSP12b:C44C	T13599C
EPI_ISL_422108	13599	T	C	13597	29901	NSP12b	C44C	SNP_silent	RNA-dependent RNA polymerase, post-ribosomal frameshift	NSP12b:C44C	T13599C
EPI_ISL_432320	13599	T	C	13598	29902	NSP12b	C44C	SNP_silent	RNA-dependent RNA polymerase, post-ribosomal frameshift	NSP12b:C44C	T13599C
EPI_ISL_424229	13608	C	T	13577	29863	NSP12b	F47F	SNP_silent	RNA-dependent RNA polymerase, post-ribosomal frameshift	NSP12b:F47F	C13608T
EPI_ISL_459278	13611	A	G	13557	29782	NSP12b	Q48Q	SNP_silent	RNA-dependent RNA polymerase, post-ribosomal frameshift	NSP12b:Q48Q	A13611G
EPI_ISL_470291	13611	A	G	13557	29782	NSP12b	Q48Q	SNP_silent	RNA-dependent RNA polymerase, post-ribosomal frameshift	NSP12b:Q48Q	A13611G
EPI_ISL_418429	13616	A	G	13618	29879	NSP12b	K50R	SNP	RNA-dependent RNA polymerase, post-ribosomal frameshift	NSP12b:K50R	A13616G
EPI_ISL_447279	13617	G	T	13618	29892	NSP12b	K50N	SNP	RNA-dependent RNA polymerase, post-ribosomal frameshift	NSP12b:K50N	G13617T
EPI_ISL_450785	13617	G	T	13617	29903	NSP12b	K50N	SNP	RNA-dependent RNA polymerase, post-ribosomal frameshift	NSP12b:K50N	G13617T
EPI_ISL_450786	13617	G	T	13617	29903	NSP12b	K50N	SNP	RNA-dependent RNA polymerase, post-ribosomal frameshift	NSP12b:K50N	G13617T
EPI_ISL_455420	13617	G	T	13617	29862	NSP12b	K50N	SNP	RNA-dependent RNA polymerase, post-ribosomal frameshift	NSP12b:K50N	G13617T
EPI_ISL_457301	13617	G	T	13617	29903	NSP12b	K50N	SNP	RNA-dependent RNA polymerase, post-ribosomal frameshift	NSP12b:K50N	G13617T
EPI_ISL_458419	13617	G	T	13563	29782	NSP12b	K50N	SNP	RNA-dependent RNA polymerase, post-ribosomal frameshift	NSP12b:K50N	G13617T
EPI_ISL_469621	13617	G	T	13563	29783	NSP12b	K50N	SNP	RNA-dependent RNA polymerase, post-ribosomal frameshift	NSP12b:K50N	G13617T
EPI_ISL_469785	13617	G	T	13563	29782	NSP12b	K50N	SNP	RNA-dependent RNA polymerase, post-ribosomal frameshift	NSP12b:K50N	G13617T
EPI_ISL_425216	13617	G	T	13563	29782	NSP12b	K50N	SNP	RNA-dependent RNA polymerase, post-ribosomal frameshift	NSP12b:K50N	G13617T
EPI_ISL_438930	13617	G	T	13563	29782	NSP12b	K50N	SNP	RNA-dependent RNA polymerase, post-ribosomal frameshift	NSP12b:K50N	G13617T
EPI_ISL_454760	13617	G	T	13593	29846	NSP12b	K50N	SNP	RNA-dependent RNA polymerase, post-ribosomal frameshift	NSP12b:K50N	G13617T
EPI_ISL_439870	13617	G	A	13563	29782	NSP12b	K50K	SNP_silent	RNA-dependent RNA polymerase, post-ribosomal frameshift	NSP12b:K50K	G13617A
EPI_ISL_466804	13617	G	T	13617	29903	NSP12b	K50N	SNP	RNA-dependent RNA polymerase, post-ribosomal frameshift	NSP12b:K50N	G13617T
EPI_ISL_418246	13617	G	T	13617	29781	NSP12b	K50N	SNP	RNA-dependent RNA polymerase, post-ribosomal frameshift	NSP12b:K50N	G13617T
EPI_ISL_447337	13618	G	T	13619	29892	NSP12b	D51Y	SNP	RNA-dependent RNA polymerase, post-ribosomal frameshift	NSP12b:D51Y	G13618T
EPI_ISL_461275	13618	G	T	13564	29775	NSP12b	D51Y	SNP	RNA-dependent RNA polymerase, post-ribosomal frameshift	NSP12b:D51Y	G13618T
EPI_ISL_428954	13620	C	T	13620	29863	NSP12b	D51D	SNP_silent	RNA-dependent RNA polymerase, post-ribosomal frameshift	NSP12b:D51D	C13620T
EPI_ISL_428958	13620	C	T	13620	29854	NSP12b	D51D	SNP_silent	RNA-dependent RNA polymerase, post-ribosomal frameshift	NSP12b:D51D	C13620T
EPI_ISL_417186	13620	C	T	13620	29903	NSP12b	D51D	SNP_silent	RNA-dependent RNA polymerase, post-ribosomal frameshift	NSP12b:D51D	C13620T
EPI_ISL_429590	13620	C	T	13620	29903	NSP12b	D51D	SNP_silent	RNA-dependent RNA polymerase, post-ribosomal frameshift	NSP12b:D51D	C13620T
EPI_ISL_435058	13620	C	T	13620	29903	NSP12b	D51D	SNP_silent	RNA-dependent RNA polymerase, post-ribosomal frameshift	NSP12b:D51D	C13620T
EPI_ISL_438239	13620	C	T	13620	29903	NSP12b	D51D	SNP_silent	RNA-dependent RNA polymerase, post-ribosomal frameshift	NSP12b:D51D	C13620T
EPI_ISL_450298	13620	C	T	13620	29903	NSP12b	D51D	SNP_silent	RNA-dependent RNA polymerase, post-ribosomal frameshift	NSP12b:D51D	C13620T
EPI_ISL_451449	13620	C	T	13620	29903	NSP12b	D51D	SNP_silent	RNA-dependent RNA polymerase, post-ribosomal frameshift	NSP12b:D51D	C13620T
EPI_ISL_465475	13620	C	T	13620	29903	NSP12b	D51D	SNP_silent	RNA-dependent RNA polymerase, post-ribosomal frameshift	NSP12b:D51D	C13620T
EPI_ISL_465476	13620	C	T	13620	29903	NSP12b	D51D	SNP_silent	RNA-dependent RNA polymerase, post-ribosomal frameshift	NSP12b:D51D	C13620T
EPI_ISL_463537	13620	C	T	13620	29903	NSP12b	D51D	SNP_silent	RNA-dependent RNA polymerase, post-ribosomal frameshift	NSP12b:D51D	C13620T
EPI_ISL_458221	13620	C	T	13566	29782	NSP12b	D51D	SNP_silent	RNA-dependent RNA polymerase, post-ribosomal frameshift	NSP12b:D51D	C13620T
EPI_ISL_468348	13620	C	T	13582	29864	NSP12b	D51D	SNP_silent	RNA-dependent RNA polymerase, post-ribosomal frameshift	NSP12b:D51D	C13620T
EPI_ISL_440702	13622	A	C	13613	29827	NSP12b	E52A	SNP	RNA-dependent RNA polymerase, post-ribosomal frameshift	NSP12b:E52A	A13622C
EPI_ISL_429461	13624	G	T	13624	29903	NSP12b	D53Y	SNP	RNA-dependent RNA polymerase, post-ribosomal frameshift	NSP12b:D53Y	G13624T
EPI_ISL_452097	13624	G	T	13624	29903	NSP12b	D53Y	SNP	RNA-dependent RNA polymerase, post-ribosomal frameshift	NSP12b:D53Y	G13624T
EPI_ISL_469532	13624	G	T	13570	29782	NSP12b	D53Y	SNP	RNA-dependent RNA polymerase, post-ribosomal frameshift	NSP12b:D53Y	G13624T
EPI_ISL_423316	13624	G	T	13624	29903	NSP12b	D53Y	SNP	RNA-dependent RNA polymerase, post-ribosomal frameshift	NSP12b:D53Y	G13624T
EPI_ISL_434153	13624	G	T	13624	29903	NSP12b	D53Y	SNP	RNA-dependent RNA polymerase, post-ribosomal frameshift	NSP12b:D53Y	G13624T
EPI_ISL_453879	13626	T	C	13586	29763	NSP12b	D53D	SNP_silent	RNA-dependent RNA polymerase, post-ribosomal frameshift	NSP12b:D53D	T13626C
EPI_ISL_452980	13627	G	T	13627	29903	NSP12b	D54Y	SNP	RNA-dependent RNA polymerase, post-ribosomal frameshift	NSP12b:D54Y	G13627T
EPI_ISL_427140	13627	G	T	13627	29903	NSP12b	D54Y	SNP	RNA-dependent RNA polymerase, post-ribosomal frameshift	NSP12b:D54Y	G13627T
EPI_ISL_465306	13627	G	T	13627	29902	NSP12b	D54Y	SNP	RNA-dependent RNA polymerase, post-ribosomal frameshift	NSP12b:D54Y	G13627T
EPI_ISL_443976	13627	G	T	13564	29803	NSP12b	D54Y	SNP	RNA-dependent RNA polymerase, post-ribosomal frameshift	NSP12b:D54Y	G13627T
EPI_ISL_465243	13627	G	T	13618	29894	NSP12b	D54Y	SNP	RNA-dependent RNA polymerase, post-ribosomal frameshift	NSP12b:D54Y	G13627T
EPI_ISL_418669	13627	G	T	13627	29903	NSP12b	D54Y	SNP	RNA-dependent RNA polymerase, post-ribosomal frameshift	NSP12b:D54Y	G13627T
EPI_ISL_419399	13627	G	T	13626	29902	NSP12b	D54Y	SNP	RNA-dependent RNA polymerase, post-ribosomal frameshift	NSP12b:D54Y	G13627T
EPI_ISL_423813	13627	G	T	13627	29903	NSP12b	D54Y	SNP	RNA-dependent RNA polymerase, post-ribosomal frameshift	NSP12b:D54Y	G13627T
EPI_ISL_465774	13627	G	T	13627	29903	NSP12b	D54Y	SNP	RNA-dependent RNA polymerase, post-ribosomal frameshift	NSP12b:D54Y	G13627T
EPI_ISL_423112	13627	G	T	13618	29894	NSP12b	D54Y	SNP	RNA-dependent RNA polymerase, post-ribosomal frameshift	NSP12b:D54Y	G13627T
EPI_ISL_442216	13627	G	T	13573	29782	NSP12b	D54Y	SNP	RNA-dependent RNA polymerase, post-ribosomal frameshift	NSP12b:D54Y	G13627T
EPI_ISL_423958	13627	G	T	13627	29903	NSP12b	D54Y	SNP	RNA-dependent RNA polymerase, post-ribosomal frameshift	NSP12b:D54Y	G13627T
EPI_ISL_441112	13627	G	T	13573	29849	NSP12b	D54Y	SNP	RNA-dependent RNA polymerase, post-ribosomal frameshift	NSP12b:D54Y	G13627T
EPI_ISL_423474	13627	G	T	13627	29903	NSP12b	D54Y	SNP	RNA-dependent RNA polymerase, post-ribosomal frameshift	NSP12b:D54Y	G13627T
EPI_ISL_432270	13627	G	T	13625	29901	NSP12b	D54Y	SNP	RNA-dependent RNA polymerase, post-ribosomal frameshift	NSP12b:D54Y	G13627T
EPI_ISL_438398	13627	G	T	13573	29813	NSP12b	D54Y	SNP	RNA-dependent RNA polymerase, post-ribosomal frameshift	NSP12b:D54Y	G13627T
EPI_ISL_442060	13627	G	T	13573	29782	NSP12b	D54Y	SNP	RNA-dependent RNA polymerase, post-ribosomal frameshift	NSP12b:D54Y	G13627T
EPI_ISL_445459	13627	G	T	13623	29899	NSP12b	D54Y	SNP	RNA-dependent RNA polymerase, post-ribosomal frameshift	NSP12b:D54Y	G13627T
EPI_ISL_445498	13627	G	T	13621	29897	NSP12b	D54Y	SNP	RNA-dependent RNA polymerase, post-ribosomal frameshift	NSP12b:D54Y	G13627T
EPI_ISL_448650	13627	G	T	13627	29903	NSP12b	D54Y	SNP	RNA-dependent RNA polymerase, post-ribosomal frameshift	NSP12b:D54Y	G13627T
EPI_ISL_448748	13627	G	T	13627	29903	NSP12b	D54Y	SNP	RNA-dependent RNA polymerase, post-ribosomal frameshift	NSP12b:D54Y	G13627T
EPI_ISL_465307	13627	G	T	13627	29903	NSP12b	D54Y	SNP	RNA-dependent RNA polymerase, post-ribosomal frameshift	NSP12b:D54Y	G13627T
EPI_ISL_472551	13627	G	T	13592	29868	NSP12b	D54Y	SNP	RNA-dependent RNA polymerase, post-ribosomal frameshift	NSP12b:D54Y	G13627T
EPI_ISL_472913	13627	G	T	13627	29903	NSP12b	D54Y	SNP	RNA-dependent RNA polymerase, post-ribosomal frameshift	NSP12b:D54Y	G13627T
EPI_ISL_443653	13627	G	T	13573	29782	NSP12b	D54Y	SNP	RNA-dependent RNA polymerase, post-ribosomal frameshift	NSP12b:D54Y	G13627T
EPI_ISL_456177	13627	G	T	13627	29903	NSP12b	D54Y	SNP	RNA-dependent RNA polymerase, post-ribosomal frameshift	NSP12b:D54Y	G13627T
EPI_ISL_417212	13627	G	T	13460	29685	NSP12b	D54Y	SNP	RNA-dependent RNA polymerase, post-ribosomal frameshift	NSP12b:D54Y	G13627T
EPI_ISL_456159	13627	G	T	13627	29903	NSP12b	D54Y	SNP	RNA-dependent RNA polymerase, post-ribosomal frameshift	NSP12b:D54Y	G13627T
EPI_ISL_456162	13627	G	T	13627	29903	NSP12b	D54Y	SNP	RNA-dependent RNA polymerase, post-ribosomal frameshift	NSP12b:D54Y	G13627T
EPI_ISL_456252	13627	G	T	13627	29903	NSP12b	D54Y	SNP	RNA-dependent RNA polymerase, post-ribosomal frameshift	NSP12b:D54Y	G13627T
EPI_ISL_456233	13627	G	T	13627	29903	NSP12b	D54Y	SNP	RNA-dependent RNA polymerase, post-ribosomal frameshift	NSP12b:D54Y	G13627T
EPI_ISL_456235	13627	G	T	13627	29903	NSP12b	D54Y	SNP	RNA-dependent RNA polymerase, post-ribosomal frameshift	NSP12b:D54Y	G13627T
EPI_ISL_426788	13627	G	T	13627	29903	NSP12b	D54Y	SNP	RNA-dependent RNA polymerase, post-ribosomal frameshift	NSP12b:D54Y	G13627T
EPI_ISL_423393	13627	G	T	13627	29903	NSP12b	D54Y	SNP	RNA-dependent RNA polymerase, post-ribosomal frameshift	NSP12b:D54Y	G13627T
EPI_ISL_466414	13627	G	T	13627	29902	NSP12b	D54Y	SNP	RNA-dependent RNA polymerase, post-ribosomal frameshift	NSP12b:D54Y	G13627T
EPI_ISL_466352	13627	G	T	13627	29903	NSP12b	D54Y	SNP	RNA-dependent RNA polymerase, post-ribosomal frameshift	NSP12b:D54Y	G13627T
EPI_ISL_419918	13627	G	T	13624	29900	NSP12b	D54Y	SNP	RNA-dependent RNA polymerase, post-ribosomal frameshift	NSP12b:D54Y	G13627T
EPI_ISL_419973	13627	G	T	13617	29893	NSP12b	D54Y	SNP	RNA-dependent RNA polymerase, post-ribosomal frameshift	NSP12b:D54Y	G13627T
EPI_ISL_419981	13627	G	T	13577	29853	NSP12b	D54Y	SNP	RNA-dependent RNA polymerase, post-ribosomal frameshift	NSP12b:D54Y	G13627T
EPI_ISL_419996	13627	G	T	13615	29891	NSP12b	D54Y	SNP	RNA-dependent RNA polymerase, post-ribosomal frameshift	NSP12b:D54Y	G13627T
EPI_ISL_420016	13627	G	T	13589	29865	NSP12b	D54Y	SNP	RNA-dependent RNA polymerase, post-ribosomal frameshift	NSP12b:D54Y	G13627T
EPI_ISL_420017	13627	G	T	13626	29902	NSP12b	D54Y	SNP	RNA-dependent RNA polymerase, post-ribosomal frameshift	NSP12b:D54Y	G13627T
EPI_ISL_423088	13627	G	T	13627	29903	NSP12b	D54Y	SNP	RNA-dependent RNA polymerase, post-ribosomal frameshift	NSP12b:D54Y	G13627T
EPI_ISL_426651	13627	G	T	13623	29856	NSP12b	D54Y	SNP	RNA-dependent RNA polymerase, post-ribosomal frameshift	NSP12b:D54Y	G13627T
EPI_ISL_426653	13627	G	T	13589	29820	NSP12b	D54Y	SNP	RNA-dependent RNA polymerase, post-ribosomal frameshift	NSP12b:D54Y	G13627T
EPI_ISL_426685	13627	G	T	13627	29903	NSP12b	D54Y	SNP	RNA-dependent RNA polymerase, post-ribosomal frameshift	NSP12b:D54Y	G13627T
EPI_ISL_426706	13627	G	T	13626	29902	NSP12b	D54Y	SNP	RNA-dependent RNA polymerase, post-ribosomal frameshift	NSP12b:D54Y	G13627T
EPI_ISL_426722	13627	G	T	13627	29903	NSP12b	D54Y	SNP	RNA-dependent RNA polymerase, post-ribosomal frameshift	NSP12b:D54Y	G13627T
EPI_ISL_426779	13627	G	T	13627	29903	NSP12b	D54Y	SNP	RNA-dependent RNA polymerase, post-ribosomal frameshift	NSP12b:D54Y	G13627T
EPI_ISL_426781	13627	G	T	13627	29903	NSP12b	D54Y	SNP	RNA-dependent RNA polymerase, post-ribosomal frameshift	NSP12b:D54Y	G13627T
EPI_ISL_427030	13627	G	T	13627	29883	NSP12b	D54Y	SNP	RNA-dependent RNA polymerase, post-ribosomal frameshift	NSP12b:D54Y	G13627T
EPI_ISL_427082	13627	G	T	13627	29903	NSP12b	D54Y	SNP	RNA-dependent RNA polymerase, post-ribosomal frameshift	NSP12b:D54Y	G13627T
EPI_ISL_427668	13627	G	T	13363	29412	NSP12b	D54Y	SNP	RNA-dependent RNA polymerase, post-ribosomal frameshift	NSP12b:D54Y	G13627T
EPI_ISL_427687	13627	G	T	13363	29412	NSP12b	D54Y	SNP	RNA-dependent RNA polymerase, post-ribosomal frameshift	NSP12b:D54Y	G13627T
EPI_ISL_429257	13627	G	T	13627	29903	NSP12b	D54Y	SNP	RNA-dependent RNA polymerase, post-ribosomal frameshift	NSP12b:D54Y	G13627T
EPI_ISL_430653	13627	G	T	13627	29903	NSP12b	D54Y	SNP	RNA-dependent RNA polymerase, post-ribosomal frameshift	NSP12b:D54Y	G13627T
EPI_ISL_444943	13627	G	T	13627	29903	NSP12b	D54Y	SNP	RNA-dependent RNA polymerase, post-ribosomal frameshift	NSP12b:D54Y	G13627T
EPI_ISL_456187	13627	G	T	13627	29903	NSP12b	D54Y	SNP	RNA-dependent RNA polymerase, post-ribosomal frameshift	NSP12b:D54Y	G13627T
EPI_ISL_456190	13627	G	T	13627	29903	NSP12b	D54Y	SNP	RNA-dependent RNA polymerase, post-ribosomal frameshift	NSP12b:D54Y	G13627T
EPI_ISL_456201	13627	G	T	13627	29903	NSP12b	D54Y	SNP	RNA-dependent RNA polymerase, post-ribosomal frameshift	NSP12b:D54Y	G13627T
EPI_ISL_456205	13627	G	T	13627	29903	NSP12b	D54Y	SNP	RNA-dependent RNA polymerase, post-ribosomal frameshift	NSP12b:D54Y	G13627T
EPI_ISL_456216	13627	G	T	13627	29903	NSP12b	D54Y	SNP	RNA-dependent RNA polymerase, post-ribosomal frameshift	NSP12b:D54Y	G13627T
EPI_ISL_456220	13627	G	T	13627	29903	NSP12b	D54Y	SNP	RNA-dependent RNA polymerase, post-ribosomal frameshift	NSP12b:D54Y	G13627T
EPI_ISL_456236	13627	G	T	13627	29903	NSP12b	D54Y	SNP	RNA-dependent RNA polymerase, post-ribosomal frameshift	NSP12b:D54Y	G13627T
EPI_ISL_456237	13627	G	T	13627	29903	NSP12b	D54Y	SNP	RNA-dependent RNA polymerase, post-ribosomal frameshift	NSP12b:D54Y	G13627T
EPI_ISL_456240	13627	G	T	13627	29903	NSP12b	D54Y	SNP	RNA-dependent RNA polymerase, post-ribosomal frameshift	NSP12b:D54Y	G13627T
EPI_ISL_456242	13627	G	T	13627	29903	NSP12b	D54Y	SNP	RNA-dependent RNA polymerase, post-ribosomal frameshift	NSP12b:D54Y	G13627T
EPI_ISL_456254	13627	G	T	13627	29903	NSP12b	D54Y	SNP	RNA-dependent RNA polymerase, post-ribosomal frameshift	NSP12b:D54Y	G13627T
EPI_ISL_456274	13627	G	T	13627	29903	NSP12b	D54Y	SNP	RNA-dependent RNA polymerase, post-ribosomal frameshift	NSP12b:D54Y	G13627T
EPI_ISL_456280	13627	G	T	13627	29903	NSP12b	D54Y	SNP	RNA-dependent RNA polymerase, post-ribosomal frameshift	NSP12b:D54Y	G13627T
EPI_ISL_456284	13627	G	T	13627	29903	NSP12b	D54Y	SNP	RNA-dependent RNA polymerase, post-ribosomal frameshift	NSP12b:D54Y	G13627T
EPI_ISL_456305	13627	G	T	13627	29903	NSP12b	D54Y	SNP	RNA-dependent RNA polymerase, post-ribosomal frameshift	NSP12b:D54Y	G13627T
EPI_ISL_456318	13627	G	T	13627	29903	NSP12b	D54Y	SNP	RNA-dependent RNA polymerase, post-ribosomal frameshift	NSP12b:D54Y	G13627T
EPI_ISL_456357	13627	G	T	13627	29903	NSP12b	D54Y	SNP	RNA-dependent RNA polymerase, post-ribosomal frameshift	NSP12b:D54Y	G13627T
EPI_ISL_456449	13627	G	T	13627	29903	NSP12b	D54Y	SNP	RNA-dependent RNA polymerase, post-ribosomal frameshift	NSP12b:D54Y	G13627T
EPI_ISL_465092	13627	G	T	13627	29903	NSP12b	D54Y	SNP	RNA-dependent RNA polymerase, post-ribosomal frameshift	NSP12b:D54Y	G13627T
EPI_ISL_424158	13627	G	T	13627	29903	NSP12b	D54Y	SNP	RNA-dependent RNA polymerase, post-ribosomal frameshift	NSP12b:D54Y	G13627T
EPI_ISL_439527	13627	G	T	13623	29899	NSP12b	D54Y	SNP	RNA-dependent RNA polymerase, post-ribosomal frameshift	NSP12b:D54Y	G13627T
EPI_ISL_423985	13627	G	T	13627	29903	NSP12b	D54Y	SNP	RNA-dependent RNA polymerase, post-ribosomal frameshift	NSP12b:D54Y	G13627T
EPI_ISL_424019	13627	G	T	13627	29903	NSP12b	D54Y	SNP	RNA-dependent RNA polymerase, post-ribosomal frameshift	NSP12b:D54Y	G13627T
EPI_ISL_442769	13627	G	T	13576	29785	NSP12b	D54Y	SNP	RNA-dependent RNA polymerase, post-ribosomal frameshift	NSP12b:D54Y	G13627T
EPI_ISL_465898	13627	G	T	13627	29903	NSP12b	D54Y	SNP	RNA-dependent RNA polymerase, post-ribosomal frameshift	NSP12b:D54Y	G13627T
EPI_ISL_436102	13627	G	T	13627	29952	NSP12b	D54Y	SNP	RNA-dependent RNA polymerase, post-ribosomal frameshift	NSP12b:D54Y	G13627T
EPI_ISL_464827	13627	G	T	13627	29903	NSP12b	D54Y	SNP	RNA-dependent RNA polymerase, post-ribosomal frameshift	NSP12b:D54Y	G13627T
EPI_ISL_449645	13627	G	T	13627	29903	NSP12b	D54Y	SNP	RNA-dependent RNA polymerase, post-ribosomal frameshift	NSP12b:D54Y	G13627T
EPI_ISL_466012	13627	G	T	13627	29903	NSP12b	D54Y	SNP	RNA-dependent RNA polymerase, post-ribosomal frameshift	NSP12b:D54Y	G13627T
EPI_ISL_438626	13627	G	T	13627	29903	NSP12b	D54Y	SNP	RNA-dependent RNA polymerase, post-ribosomal frameshift	NSP12b:D54Y	G13627T
EPI_ISL_459413	13627	G	T	13576	29785	NSP12b	D54Y	SNP	RNA-dependent RNA polymerase, post-ribosomal frameshift	NSP12b:D54Y	G13627T
EPI_ISL_422007	13627	G	T	13627	29903	NSP12b	D54Y	SNP	RNA-dependent RNA polymerase, post-ribosomal frameshift	NSP12b:D54Y	G13627T
EPI_ISL_422177	13627	G	T	13620	29896	NSP12b	D54Y	SNP	RNA-dependent RNA polymerase, post-ribosomal frameshift	NSP12b:D54Y	G13627T
EPI_ISL_423426	13627	G	T	13627	29903	NSP12b	D54Y	SNP	RNA-dependent RNA polymerase, post-ribosomal frameshift	NSP12b:D54Y	G13627T
EPI_ISL_423704	13627	G	T	13627	29903	NSP12b	D54Y	SNP	RNA-dependent RNA polymerase, post-ribosomal frameshift	NSP12b:D54Y	G13627T
EPI_ISL_441735	13627	G	T	13573	29803	NSP12b	D54Y	SNP	RNA-dependent RNA polymerase, post-ribosomal frameshift	NSP12b:D54Y	G13627T
EPI_ISL_442900	13627	G	T	13573	29782	NSP12b	D54Y	SNP	RNA-dependent RNA polymerase, post-ribosomal frameshift	NSP12b:D54Y	G13627T
EPI_ISL_443102	13627	G	T	13573	29849	NSP12b	D54Y	SNP	RNA-dependent RNA polymerase, post-ribosomal frameshift	NSP12b:D54Y	G13627T
EPI_ISL_432988	13627	G	T	13627	29903	NSP12b	D54Y	SNP	RNA-dependent RNA polymerase, post-ribosomal frameshift	NSP12b:D54Y	G13627T
EPI_ISL_420246	13627	G	T	13627	29903	NSP12b	D54Y	SNP	RNA-dependent RNA polymerase, post-ribosomal frameshift	NSP12b:D54Y	G13627T
EPI_ISL_465797	13627	G	T	13627	29903	NSP12b	D54Y	SNP	RNA-dependent RNA polymerase, post-ribosomal frameshift	NSP12b:D54Y	G13627T
EPI_ISL_420676	13627	G	T	13627	29903	NSP12b	D54Y	SNP	RNA-dependent RNA polymerase, post-ribosomal frameshift	NSP12b:D54Y	G13627T
EPI_ISL_465879	13627	G	T	13627	29903	NSP12b	D54Y	SNP	RNA-dependent RNA polymerase, post-ribosomal frameshift	NSP12b:D54Y	G13627T
EPI_ISL_459069	13627	G	T	13573	29782	NSP12b	D54Y	SNP	RNA-dependent RNA polymerase, post-ribosomal frameshift	NSP12b:D54Y	G13627T
EPI_ISL_465608	13627	G	T	13627	29903	NSP12b	D54Y	SNP	RNA-dependent RNA polymerase, post-ribosomal frameshift	NSP12b:D54Y	G13627T
EPI_ISL_423210	13627	G	T	13627	29903	NSP12b	D54Y	SNP	RNA-dependent RNA polymerase, post-ribosomal frameshift	NSP12b:D54Y	G13627T
EPI_ISL_424164	13627	G	T	13627	29903	NSP12b	D54Y	SNP	RNA-dependent RNA polymerase, post-ribosomal frameshift	NSP12b:D54Y	G13627T
EPI_ISL_465735	13627	G	T	13627	29903	NSP12b	D54Y	SNP	RNA-dependent RNA polymerase, post-ribosomal frameshift	NSP12b:D54Y	G13627T
EPI_ISL_427028	13627	G	T	13630	29906	NSP12b	D54Y	SNP	RNA-dependent RNA polymerase, post-ribosomal frameshift	NSP12b:D54Y	G13627T
EPI_ISL_438282	13627	G	T	13576	29732	NSP12b	D54Y	SNP	RNA-dependent RNA polymerase, post-ribosomal frameshift	NSP12b:D54Y	G13627T
EPI_ISL_442699	13627	G	T	13576	29815	NSP12b	D54Y	SNP	RNA-dependent RNA polymerase, post-ribosomal frameshift	NSP12b:D54Y	G13627T
EPI_ISL_466527	13627	G	T	13630	29906	NSP12b	D54Y	SNP	RNA-dependent RNA polymerase, post-ribosomal frameshift	NSP12b:D54Y	G13627T
EPI_ISL_419873	13627	G	T	13621	29897	NSP12b	D54Y	SNP	RNA-dependent RNA polymerase, post-ribosomal frameshift	NSP12b:D54Y	G13627T
EPI_ISL_421929	13627	G	T	13627	29903	NSP12b	D54Y	SNP	RNA-dependent RNA polymerase, post-ribosomal frameshift	NSP12b:D54Y	G13627T
EPI_ISL_423259	13627	G	T	13627	29903	NSP12b	D54Y	SNP	RNA-dependent RNA polymerase, post-ribosomal frameshift	NSP12b:D54Y	G13627T
EPI_ISL_423273	13627	G	T	13627	29903	NSP12b	D54Y	SNP	RNA-dependent RNA polymerase, post-ribosomal frameshift	NSP12b:D54Y	G13627T
EPI_ISL_423622	13627	G	T	13627	29903	NSP12b	D54Y	SNP	RNA-dependent RNA polymerase, post-ribosomal frameshift	NSP12b:D54Y	G13627T
EPI_ISL_423767	13627	G	T	13627	29903	NSP12b	D54Y	SNP	RNA-dependent RNA polymerase, post-ribosomal frameshift	NSP12b:D54Y	G13627T
EPI_ISL_423933	13627	G	T	13627	29903	NSP12b	D54Y	SNP	RNA-dependent RNA polymerase, post-ribosomal frameshift	NSP12b:D54Y	G13627T
EPI_ISL_440122	13627	G	T	13573	29782	NSP12b	D54Y	SNP	RNA-dependent RNA polymerase, post-ribosomal frameshift	NSP12b:D54Y	G13627T
EPI_ISL_441099	13627	G	T	13573	29782	NSP12b	D54Y	SNP	RNA-dependent RNA polymerase, post-ribosomal frameshift	NSP12b:D54Y	G13627T
EPI_ISL_441300	13627	G	T	13573	29849	NSP12b	D54Y	SNP	RNA-dependent RNA polymerase, post-ribosomal frameshift	NSP12b:D54Y	G13627T
EPI_ISL_464814	13627	G	T	13627	29903	NSP12b	D54Y	SNP	RNA-dependent RNA polymerase, post-ribosomal frameshift	NSP12b:D54Y	G13627T
EPI_ISL_465034	13627	G	T	13627	29903	NSP12b	D54Y	SNP	RNA-dependent RNA polymerase, post-ribosomal frameshift	NSP12b:D54Y	G13627T
EPI_ISL_465830	13627	G	T	13627	29903	NSP12b	D54Y	SNP	RNA-dependent RNA polymerase, post-ribosomal frameshift	NSP12b:D54Y	G13627T
EPI_ISL_466327	13627	G	T	13627	29903	NSP12b	D54Y	SNP	RNA-dependent RNA polymerase, post-ribosomal frameshift	NSP12b:D54Y	G13627T
EPI_ISL_466337	13627	G	T	13627	29903	NSP12b	D54Y	SNP	RNA-dependent RNA polymerase, post-ribosomal frameshift	NSP12b:D54Y	G13627T
EPI_ISL_470501	13627	G	T	13573	29782	NSP12b	D54Y	SNP	RNA-dependent RNA polymerase, post-ribosomal frameshift	NSP12b:D54Y	G13627T
EPI_ISL_466328	13627	G	T	13627	29903	NSP12b	D54Y	SNP	RNA-dependent RNA polymerase, post-ribosomal frameshift	NSP12b:D54Y	G13627T
EPI_ISL_466339	13627	G	T	13627	29903	NSP12b	D54Y	SNP	RNA-dependent RNA polymerase, post-ribosomal frameshift	NSP12b:D54Y	G13627T
EPI_ISL_473514	13629	C	T	13629	29903	NSP12b	D54D	SNP_silent	RNA-dependent RNA polymerase, post-ribosomal frameshift	NSP12b:D54D	C13629T
EPI_ISL_473674	13629	C	T	13566	29773	NSP12b	D54D	SNP_silent	RNA-dependent RNA polymerase, post-ribosomal frameshift	NSP12b:D54D	C13629T
EPI_ISL_473722	13629	C	T	13575	29782	NSP12b	D54D	SNP_silent	RNA-dependent RNA polymerase, post-ribosomal frameshift	NSP12b:D54D	C13629T
EPI_ISL_427779	13631	A	G	13367	29412	NSP12b	N55S	SNP	RNA-dependent RNA polymerase, post-ribosomal frameshift	NSP12b:N55S	A13631G
EPI_ISL_424177	13631	A	T	13600	29872	NSP12b	N55I	SNP	RNA-dependent RNA polymerase, post-ribosomal frameshift	NSP12b:N55I	A13631T
EPI_ISL_469100	13631	A	G	13631	29891	NSP12b	N55S	SNP	RNA-dependent RNA polymerase, post-ribosomal frameshift	NSP12b:N55S	A13631G
EPI_ISL_454528	13639	G	A	13639	29903	NSP12b	D58N	SNP	RNA-dependent RNA polymerase, post-ribosomal frameshift	NSP12b:D58N	G13639A
EPI_ISL_457874	13639	G	A	13585	29774	NSP12b	D58N	SNP	RNA-dependent RNA polymerase, post-ribosomal frameshift	NSP12b:D58N	G13639A
EPI_ISL_457937	13639	G	A	13639	29903	NSP12b	D58N	SNP	RNA-dependent RNA polymerase, post-ribosomal frameshift	NSP12b:D58N	G13639A
EPI_ISL_470847	13639	G	A	13589	29798	NSP12b	D58N	SNP	RNA-dependent RNA polymerase, post-ribosomal frameshift	NSP12b:D58N	G13639A
EPI_ISL_423632	13640	A	G	13640	29903	NSP12b	D58G	SNP	RNA-dependent RNA polymerase, post-ribosomal frameshift	NSP12b:D58G	A13640G
EPI_ISL_438208	13643	C	T	13643	29903	NSP12b	S59F	SNP	RNA-dependent RNA polymerase, post-ribosomal frameshift	NSP12b:S59F	C13643T
EPI_ISL_448649	13643	C	T	13643	29903	NSP12b	S59F	SNP	RNA-dependent RNA polymerase, post-ribosomal frameshift	NSP12b:S59F	C13643T
EPI_ISL_453076	13643	C	T	13589	29782	NSP12b	S59F	SNP	RNA-dependent RNA polymerase, post-ribosomal frameshift	NSP12b:S59F	C13643T
EPI_ISL_474576	13643	C	T	13633	29893	NSP12b	S59F	SNP	RNA-dependent RNA polymerase, post-ribosomal frameshift	NSP12b:S59F	C13643T
EPI_ISL_423934	13643	C	T	13643	29903	NSP12b	S59F	SNP	RNA-dependent RNA polymerase, post-ribosomal frameshift	NSP12b:S59F	C13643T
EPI_ISL_439977	13643	C	T	13589	29782	NSP12b	S59F	SNP	RNA-dependent RNA polymerase, post-ribosomal frameshift	NSP12b:S59F	C13643T
EPI_ISL_461895	13649	T	G	13649	29903	NSP12b	F61C	SNP	RNA-dependent RNA polymerase, post-ribosomal frameshift	NSP12b:F61C	T13649G
EPI_ISL_448794	13656	T	C	13656	29903	NSP12b	V63V	SNP_silent	RNA-dependent RNA polymerase, post-ribosomal frameshift	NSP12b:V63V	T13656C
EPI_ISL_448795	13656	T	C	13656	29903	NSP12b	V63V	SNP_silent	RNA-dependent RNA polymerase, post-ribosomal frameshift	NSP12b:V63V	T13656C
EPI_ISL_457790	13660	A	C	13660	29903	NSP12b	K64K	SNP_silent	RNA-dependent RNA polymerase, post-ribosomal frameshift	NSP12b:K64K	A13660C
EPI_ISL_430942	13665	C	T	13636	29892	NSP12b	H66H	SNP_silent	RNA-dependent RNA polymerase, post-ribosomal frameshift	NSP12b:H66H	C13665T
EPI_ISL_417533	13665	C	T	13665	29877	NSP12b	H66H	SNP_silent	RNA-dependent RNA polymerase, post-ribosomal frameshift	NSP12b:H66H	C13665T
EPI_ISL_421747	13665	C	T	13665	29876	NSP12b	H66H	SNP_silent	RNA-dependent RNA polymerase, post-ribosomal frameshift	NSP12b:H66H	C13665T
EPI_ISL_437765	13665	C	T	13665	29903	NSP12b	H66H	SNP_silent	RNA-dependent RNA polymerase, post-ribosomal frameshift	NSP12b:H66H	C13665T
EPI_ISL_437766	13665	C	T	13654	29892	NSP12b	H66H	SNP_silent	RNA-dependent RNA polymerase, post-ribosomal frameshift	NSP12b:H66H	C13665T
EPI_ISL_437767	13665	C	T	13627	29865	NSP12b	H66H	SNP_silent	RNA-dependent RNA polymerase, post-ribosomal frameshift	NSP12b:H66H	C13665T
EPI_ISL_437768	13665	C	T	13659	29897	NSP12b	H66H	SNP_silent	RNA-dependent RNA polymerase, post-ribosomal frameshift	NSP12b:H66H	C13665T
EPI_ISL_449882	13665	C	A	13665	29903	NSP12b	H66Q	SNP	RNA-dependent RNA polymerase, post-ribosomal frameshift	NSP12b:H66Q	C13665A
EPI_ISL_457968	13665	C	T	13465	29541	NSP12b	H66H	SNP_silent	RNA-dependent RNA polymerase, post-ribosomal frameshift	NSP12b:H66H	C13665T
EPI_ISL_457972	13665	C	T	13465	29541	NSP12b	H66H	SNP_silent	RNA-dependent RNA polymerase, post-ribosomal frameshift	NSP12b:H66H	C13665T
EPI_ISL_458865	13665	C	T	13611	29782	NSP12b	H66H	SNP_silent	RNA-dependent RNA polymerase, post-ribosomal frameshift	NSP12b:H66H	C13665T
EPI_ISL_462845	13665	C	T	13630	29820	NSP12b	H66H	SNP_silent	RNA-dependent RNA polymerase, post-ribosomal frameshift	NSP12b:H66H	C13665T
EPI_ISL_462846	13665	C	T	13649	29843	NSP12b	H66H	SNP_silent	RNA-dependent RNA polymerase, post-ribosomal frameshift	NSP12b:H66H	C13665T
EPI_ISL_462847	13665	C	T	13627	29822	NSP12b	H66H	SNP_silent	RNA-dependent RNA polymerase, post-ribosomal frameshift	NSP12b:H66H	C13665T
EPI_ISL_462848	13665	C	T	13638	29830	NSP12b	H66H	SNP_silent	RNA-dependent RNA polymerase, post-ribosomal frameshift	NSP12b:H66H	C13665T
EPI_ISL_462849	13665	C	T	13630	29820	NSP12b	H66H	SNP_silent	RNA-dependent RNA polymerase, post-ribosomal frameshift	NSP12b:H66H	C13665T
EPI_ISL_462850	13665	C	T	13627	29815	NSP12b	H66H	SNP_silent	RNA-dependent RNA polymerase, post-ribosomal frameshift	NSP12b:H66H	C13665T
EPI_ISL_462851	13665	C	T	13627	29815	NSP12b	H66H	SNP_silent	RNA-dependent RNA polymerase, post-ribosomal frameshift	NSP12b:H66H	C13665T
EPI_ISL_462853	13665	C	T	13627	29816	NSP12b	H66H	SNP_silent	RNA-dependent RNA polymerase, post-ribosomal frameshift	NSP12b:H66H	C13665T
EPI_ISL_462854	13665	C	T	13627	29800	NSP12b	H66H	SNP_silent	RNA-dependent RNA polymerase, post-ribosomal frameshift	NSP12b:H66H	C13665T
EPI_ISL_462855	13665	C	T	13628	29819	NSP12b	H66H	SNP_silent	RNA-dependent RNA polymerase, post-ribosomal frameshift	NSP12b:H66H	C13665T
EPI_ISL_462856	13665	C	T	13631	29826	NSP12b	H66H	SNP_silent	RNA-dependent RNA polymerase, post-ribosomal frameshift	NSP12b:H66H	C13665T
EPI_ISL_462857	13665	C	T	13627	29817	NSP12b	H66H	SNP_silent	RNA-dependent RNA polymerase, post-ribosomal frameshift	NSP12b:H66H	C13665T
EPI_ISL_462858	13665	C	T	13627	29815	NSP12b	H66H	SNP_silent	RNA-dependent RNA polymerase, post-ribosomal frameshift	NSP12b:H66H	C13665T
EPI_ISL_462859	13665	C	T	13627	29770	NSP12b	H66H	SNP_silent	RNA-dependent RNA polymerase, post-ribosomal frameshift	NSP12b:H66H	C13665T
EPI_ISL_462860	13665	C	T	13661	29858	NSP12b	H66H	SNP_silent	RNA-dependent RNA polymerase, post-ribosomal frameshift	NSP12b:H66H	C13665T
EPI_ISL_462862	13665	C	T	13635	29823	NSP12b	H66H	SNP_silent	RNA-dependent RNA polymerase, post-ribosomal frameshift	NSP12b:H66H	C13665T
EPI_ISL_462863	13665	C	T	13628	29650	NSP12b	H66H	SNP_silent	RNA-dependent RNA polymerase, post-ribosomal frameshift	NSP12b:H66H	C13665T
EPI_ISL_462864	13665	C	T	13661	29856	NSP12b	H66H	SNP_silent	RNA-dependent RNA polymerase, post-ribosomal frameshift	NSP12b:H66H	C13665T
EPI_ISL_462887	13665	C	T	13628	29823	NSP12b	H66H	SNP_silent	RNA-dependent RNA polymerase, post-ribosomal frameshift	NSP12b:H66H	C13665T
EPI_ISL_462888	13665	C	T	13635	29827	NSP12b	H66H	SNP_silent	RNA-dependent RNA polymerase, post-ribosomal frameshift	NSP12b:H66H	C13665T
EPI_ISL_462889	13665	C	T	13627	29823	NSP12b	H66H	SNP_silent	RNA-dependent RNA polymerase, post-ribosomal frameshift	NSP12b:H66H	C13665T
EPI_ISL_462890	13665	C	T	13627	29823	NSP12b	H66H	SNP_silent	RNA-dependent RNA polymerase, post-ribosomal frameshift	NSP12b:H66H	C13665T
EPI_ISL_467948	13665	C	T	13655	29893	NSP12b	H66H	SNP_silent	RNA-dependent RNA polymerase, post-ribosomal frameshift	NSP12b:H66H	C13665T
EPI_ISL_468654	13665	C	T	13665	29851	NSP12b	H66H	SNP_silent	RNA-dependent RNA polymerase, post-ribosomal frameshift	NSP12b:H66H	C13665T
EPI_ISL_470750	13665	C	T	13627	29819	NSP12b	H66H	SNP_silent	RNA-dependent RNA polymerase, post-ribosomal frameshift	NSP12b:H66H	C13665T
EPI_ISL_470751	13665	C	T	13627	29823	NSP12b	H66H	SNP_silent	RNA-dependent RNA polymerase, post-ribosomal frameshift	NSP12b:H66H	C13665T
EPI_ISL_470752	13665	C	T	13627	29822	NSP12b	H66H	SNP_silent	RNA-dependent RNA polymerase, post-ribosomal frameshift	NSP12b:H66H	C13665T
EPI_ISL_470753	13665	C	T	13627	29815	NSP12b	H66H	SNP_silent	RNA-dependent RNA polymerase, post-ribosomal frameshift	NSP12b:H66H	C13665T
EPI_ISL_470754	13665	C	T	13627	29816	NSP12b	H66H	SNP_silent	RNA-dependent RNA polymerase, post-ribosomal frameshift	NSP12b:H66H	C13665T
EPI_ISL_470755	13665	C	T	13630	29816	NSP12b	H66H	SNP_silent	RNA-dependent RNA polymerase, post-ribosomal frameshift	NSP12b:H66H	C13665T
EPI_ISL_470756	13665	C	T	13627	29818	NSP12b	H66H	SNP_silent	RNA-dependent RNA polymerase, post-ribosomal frameshift	NSP12b:H66H	C13665T
EPI_ISL_470757	13665	C	T	13628	29822	NSP12b	H66H	SNP_silent	RNA-dependent RNA polymerase, post-ribosomal frameshift	NSP12b:H66H	C13665T
EPI_ISL_470758	13665	C	T	13626	29816	NSP12b	H66H	SNP_silent	RNA-dependent RNA polymerase, post-ribosomal frameshift	NSP12b:H66H	C13665T
EPI_ISL_470759	13665	C	T	13654	29844	NSP12b	H66H	SNP_silent	RNA-dependent RNA polymerase, post-ribosomal frameshift	NSP12b:H66H	C13665T
EPI_ISL_470760	13665	C	T	13628	29819	NSP12b	H66H	SNP_silent	RNA-dependent RNA polymerase, post-ribosomal frameshift	NSP12b:H66H	C13665T
EPI_ISL_470761	13665	C	T	13628	29822	NSP12b	H66H	SNP_silent	RNA-dependent RNA polymerase, post-ribosomal frameshift	NSP12b:H66H	C13665T
EPI_ISL_470762	13665	C	T	13627	29821	NSP12b	H66H	SNP_silent	RNA-dependent RNA polymerase, post-ribosomal frameshift	NSP12b:H66H	C13665T
EPI_ISL_470763	13665	C	T	13627	29815	NSP12b	H66H	SNP_silent	RNA-dependent RNA polymerase, post-ribosomal frameshift	NSP12b:H66H	C13665T
EPI_ISL_470764	13665	C	T	13627	29822	NSP12b	H66H	SNP_silent	RNA-dependent RNA polymerase, post-ribosomal frameshift	NSP12b:H66H	C13665T
EPI_ISL_470765	13665	C	T	13627	29815	NSP12b	H66H	SNP_silent	RNA-dependent RNA polymerase, post-ribosomal frameshift	NSP12b:H66H	C13665T
EPI_ISL_470766	13665	C	T	13627	29821	NSP12b	H66H	SNP_silent	RNA-dependent RNA polymerase, post-ribosomal frameshift	NSP12b:H66H	C13665T
EPI_ISL_470767	13665	C	T	13625	29819	NSP12b	H66H	SNP_silent	RNA-dependent RNA polymerase, post-ribosomal frameshift	NSP12b:H66H	C13665T
EPI_ISL_470768	13665	C	T	13627	29817	NSP12b	H66H	SNP_silent	RNA-dependent RNA polymerase, post-ribosomal frameshift	NSP12b:H66H	C13665T
EPI_ISL_470769	13665	C	T	13627	29815	NSP12b	H66H	SNP_silent	RNA-dependent RNA polymerase, post-ribosomal frameshift	NSP12b:H66H	C13665T
EPI_ISL_470770	13665	C	T	13627	29818	NSP12b	H66H	SNP_silent	RNA-dependent RNA polymerase, post-ribosomal frameshift	NSP12b:H66H	C13665T
EPI_ISL_470771	13665	C	T	13627	29803	NSP12b	H66H	SNP_silent	RNA-dependent RNA polymerase, post-ribosomal frameshift	NSP12b:H66H	C13665T
EPI_ISL_470772	13665	C	T	13627	29819	NSP12b	H66H	SNP_silent	RNA-dependent RNA polymerase, post-ribosomal frameshift	NSP12b:H66H	C13665T
EPI_ISL_470773	13665	C	T	13627	29818	NSP12b	H66H	SNP_silent	RNA-dependent RNA polymerase, post-ribosomal frameshift	NSP12b:H66H	C13665T
EPI_ISL_470774	13665	C	T	13627	29822	NSP12b	H66H	SNP_silent	RNA-dependent RNA polymerase, post-ribosomal frameshift	NSP12b:H66H	C13665T
EPI_ISL_470775	13665	C	T	13628	29822	NSP12b	H66H	SNP_silent	RNA-dependent RNA polymerase, post-ribosomal frameshift	NSP12b:H66H	C13665T
EPI_ISL_470776	13665	C	T	13634	29825	NSP12b	H66H	SNP_silent	RNA-dependent RNA polymerase, post-ribosomal frameshift	NSP12b:H66H	C13665T
EPI_ISL_470777	13665	C	T	13627	29819	NSP12b	H66H	SNP_silent	RNA-dependent RNA polymerase, post-ribosomal frameshift	NSP12b:H66H	C13665T
EPI_ISL_470778	13665	C	T	13627	29823	NSP12b	H66H	SNP_silent	RNA-dependent RNA polymerase, post-ribosomal frameshift	NSP12b:H66H	C13665T
EPI_ISL_470779	13665	C	T	13627	29821	NSP12b	H66H	SNP_silent	RNA-dependent RNA polymerase, post-ribosomal frameshift	NSP12b:H66H	C13665T
EPI_ISL_470780	13665	C	T	13627	29824	NSP12b	H66H	SNP_silent	RNA-dependent RNA polymerase, post-ribosomal frameshift	NSP12b:H66H	C13665T
EPI_ISL_470781	13665	C	T	13661	29855	NSP12b	H66H	SNP_silent	RNA-dependent RNA polymerase, post-ribosomal frameshift	NSP12b:H66H	C13665T
EPI_ISL_470782	13665	C	T	13627	29823	NSP12b	H66H	SNP_silent	RNA-dependent RNA polymerase, post-ribosomal frameshift	NSP12b:H66H	C13665T
EPI_ISL_470783	13665	C	T	13628	29823	NSP12b	H66H	SNP_silent	RNA-dependent RNA polymerase, post-ribosomal frameshift	NSP12b:H66H	C13665T
EPI_ISL_470784	13665	C	T	13627	29817	NSP12b	H66H	SNP_silent	RNA-dependent RNA polymerase, post-ribosomal frameshift	NSP12b:H66H	C13665T
EPI_ISL_470785	13665	C	T	13633	29822	NSP12b	H66H	SNP_silent	RNA-dependent RNA polymerase, post-ribosomal frameshift	NSP12b:H66H	C13665T
EPI_ISL_470786	13665	C	T	13649	29843	NSP12b	H66H	SNP_silent	RNA-dependent RNA polymerase, post-ribosomal frameshift	NSP12b:H66H	C13665T
EPI_ISL_470787	13665	C	T	13627	29813	NSP12b	H66H	SNP_silent	RNA-dependent RNA polymerase, post-ribosomal frameshift	NSP12b:H66H	C13665T
EPI_ISL_470788	13665	C	T	13627	29819	NSP12b	H66H	SNP_silent	RNA-dependent RNA polymerase, post-ribosomal frameshift	NSP12b:H66H	C13665T
EPI_ISL_470789	13665	C	T	13665	29854	NSP12b	H66H	SNP_silent	RNA-dependent RNA polymerase, post-ribosomal frameshift	NSP12b:H66H	C13665T
EPI_ISL_455050	13665	C	T	13399	29408	NSP12b	H66H	SNP_silent	RNA-dependent RNA polymerase, post-ribosomal frameshift	NSP12b:H66H	C13665T
EPI_ISL_445266	13665	C	T	13665	29875	NSP12b	H66H	SNP_silent	RNA-dependent RNA polymerase, post-ribosomal frameshift	NSP12b:H66H	C13665T
EPI_ISL_445267	13665	C	T	13618	29791	NSP12b	H66H	SNP_silent	RNA-dependent RNA polymerase, post-ribosomal frameshift	NSP12b:H66H	C13665T
EPI_ISL_447919	13665	C	T	13665	29891	NSP12b	H66H	SNP_silent	RNA-dependent RNA polymerase, post-ribosomal frameshift	NSP12b:H66H	C13665T
EPI_ISL_438946	13667	C	T	13613	29611	NSP12b	T67I	SNP	RNA-dependent RNA polymerase, post-ribosomal frameshift	NSP12b:T67I	C13667T
EPI_ISL_445147	13667	C	T	13667	29903	NSP12b	T67I	SNP	RNA-dependent RNA polymerase, post-ribosomal frameshift	NSP12b:T67I	C13667T
EPI_ISL_445242	13667	C	T	13667	29903	NSP12b	T67I	SNP	RNA-dependent RNA polymerase, post-ribosomal frameshift	NSP12b:T67I	C13667T
EPI_ISL_471239	13667	C	T	13613	29782	NSP12b	T67I	SNP	RNA-dependent RNA polymerase, post-ribosomal frameshift	NSP12b:T67I	C13667T
EPI_ISL_459539	13667	C	T	13613	29782	NSP12b	T67I	SNP	RNA-dependent RNA polymerase, post-ribosomal frameshift	NSP12b:T67I	C13667T
EPI_ISL_473619	13667	C	T	13667	29903	NSP12b	T67I	SNP	RNA-dependent RNA polymerase, post-ribosomal frameshift	NSP12b:T67I	C13667T
EPI_ISL_441008	13668	T	C	13668	29903	NSP12b	T67T	SNP_silent	RNA-dependent RNA polymerase, post-ribosomal frameshift	NSP12b:T67T	T13668C
EPI_ISL_459377	13670	T	C	13616	29782	NSP12b	F68S	SNP	RNA-dependent RNA polymerase, post-ribosomal frameshift	NSP12b:F68S	T13670C
EPI_ISL_465718	13671	C	T	13671	29903	NSP12b	F68F	SNP_silent	RNA-dependent RNA polymerase, post-ribosomal frameshift	NSP12b:F68F	C13671T
EPI_ISL_427635	13672	T	C	13672	29903	NSP12b	S69P	SNP	RNA-dependent RNA polymerase, post-ribosomal frameshift	NSP12b:S69P	T13672C
EPI_ISL_435518	13672	T	G	13672	29903	NSP12b	S69A	SNP	RNA-dependent RNA polymerase, post-ribosomal frameshift	NSP12b:S69A	T13672G
EPI_ISL_410719	13679	A	G	13671	29845	NSP12b	Y71C	SNP	RNA-dependent RNA polymerase, post-ribosomal frameshift	NSP12b:Y71C	A13679G
EPI_ISL_453833	13680	C	T	13530	29603	NSP12b	Y71Y	SNP_silent	RNA-dependent RNA polymerase, post-ribosomal frameshift	NSP12b:Y71Y	C13680T
EPI_ISL_453851	13680	C	T	13580	29703	NSP12b	Y71Y	SNP_silent	RNA-dependent RNA polymerase, post-ribosomal frameshift	NSP12b:Y71Y	C13680T
EPI_ISL_454255	13680	C	T	13530	29603	NSP12b	Y71Y	SNP_silent	RNA-dependent RNA polymerase, post-ribosomal frameshift	NSP12b:Y71Y	C13680T
EPI_ISL_454296	13680	C	T	13640	29754	NSP12b	Y71Y	SNP_silent	RNA-dependent RNA polymerase, post-ribosomal frameshift	NSP12b:Y71Y	C13680T
EPI_ISL_446194	13681	C	G	13651	29873	NSP12b	Q72E	SNP	RNA-dependent RNA polymerase, post-ribosomal frameshift	NSP12b:Q72E	C13681G
EPI_ISL_446236	13681	C	G	13675	29897	NSP12b	Q72E	SNP	RNA-dependent RNA polymerase, post-ribosomal frameshift	NSP12b:Q72E	C13681G
EPI_ISL_446243	13681	C	G	13681	29903	NSP12b	Q72E	SNP	RNA-dependent RNA polymerase, post-ribosomal frameshift	NSP12b:Q72E	C13681G
EPI_ISL_446322	13681	C	G	13678	29900	NSP12b	Q72E	SNP	RNA-dependent RNA polymerase, post-ribosomal frameshift	NSP12b:Q72E	C13681G
EPI_ISL_448691	13683	A	G	13683	29903	NSP12b	Q72Q	SNP_silent	RNA-dependent RNA polymerase, post-ribosomal frameshift	NSP12b:Q72Q	A13683G
EPI_ISL_439350	13684	C	T	13684	29903	NSP12b	H73Y	SNP	RNA-dependent RNA polymerase, post-ribosomal frameshift	NSP12b:H73Y	C13684T
EPI_ISL_454390	13684	C	T	13684	29840	NSP12b	H73Y	SNP	RNA-dependent RNA polymerase, post-ribosomal frameshift	NSP12b:H73Y	C13684T
EPI_ISL_456244	13684	C	T	13684	29903	NSP12b	H73Y	SNP	RNA-dependent RNA polymerase, post-ribosomal frameshift	NSP12b:H73Y	C13684T
EPI_ISL_473940	13684	C	T	13684	29903	NSP12b	H73Y	SNP	RNA-dependent RNA polymerase, post-ribosomal frameshift	NSP12b:H73Y	C13684T
EPI_ISL_418885	13684	C	.	13380	29599	NSP12b	Q72	deletion_frameshift	RNA-dependent RNA polymerase, post-ribosomal frameshift	NSP12b:Q72	C13684.
EPI_ISL_418068	13686	TG	AT	13472	29689	NSP12b	HE73Q*	SNP_stop	RNA-dependent RNA polymerase, post-ribosomal frameshift	NSP12b:HE73Q*	TG13686AT
EPI_ISL_427243	13686	TG	AT	13660	29875	NSP12b	HE73Q*	SNP_stop	RNA-dependent RNA polymerase, post-ribosomal frameshift	NSP12b:HE73Q*	TG13686AT
EPI_ISL_415618	13686	TG	CA	13608	29825	NSP12b	E74K	SNP	RNA-dependent RNA polymerase, post-ribosomal frameshift	NSP12b:E74K	TG13686CA
EPI_ISL_415610	13686	TG	AT	13421	29645	NSP12b	HE73Q*	SNP_stop	RNA-dependent RNA polymerase, post-ribosomal frameshift	NSP12b:HE73Q*	TG13686AT
EPI_ISL_418877	13686	TG	AT	13655	29870	NSP12b	HE73Q*	SNP_stop	RNA-dependent RNA polymerase, post-ribosomal frameshift	NSP12b:HE73Q*	TG13686AT
EPI_ISL_418885	13686	TG	GT	13382	29599	NSP12b	HE73Q*	SNP_stop	RNA-dependent RNA polymerase, post-ribosomal frameshift	NSP12b:HE73Q*	TG13686GT
EPI_ISL_423023	13687	G	T	13381	29608	NSP12b	E74*	SNP_stop	RNA-dependent RNA polymerase, post-ribosomal frameshift	NSP12b:E74*	G13687T
EPI_ISL_429598	13687	G	T	13678	29894	NSP12b	E74*	SNP_stop	RNA-dependent RNA polymerase, post-ribosomal frameshift	NSP12b:E74*	G13687T
EPI_ISL_424177	13687	G	T	13656	29872	NSP12b	E74*	SNP_stop	RNA-dependent RNA polymerase, post-ribosomal frameshift	NSP12b:E74*	G13687T
EPI_ISL_433048	13690	G	A	13690	29903	NSP12b	E75K	SNP	RNA-dependent RNA polymerase, post-ribosomal frameshift	NSP12b:E75K	G13690A
EPI_ISL_441493	13690	G	A	13690	29903	NSP12b	E75K	SNP	RNA-dependent RNA polymerase, post-ribosomal frameshift	NSP12b:E75K	G13690A
EPI_ISL_441511	13690	G	A	13690	29903	NSP12b	E75K	SNP	RNA-dependent RNA polymerase, post-ribosomal frameshift	NSP12b:E75K	G13690A
EPI_ISL_448420	13690	G	A	13690	29903	NSP12b	E75K	SNP	RNA-dependent RNA polymerase, post-ribosomal frameshift	NSP12b:E75K	G13690A
EPI_ISL_448438	13690	G	A	13690	29903	NSP12b	E75K	SNP	RNA-dependent RNA polymerase, post-ribosomal frameshift	NSP12b:E75K	G13690A
EPI_ISL_453649	13690	G	A	13690	29903	NSP12b	E75K	SNP	RNA-dependent RNA polymerase, post-ribosomal frameshift	NSP12b:E75K	G13690A
EPI_ISL_453650	13690	G	A	13690	29903	NSP12b	E75K	SNP	RNA-dependent RNA polymerase, post-ribosomal frameshift	NSP12b:E75K	G13690A
EPI_ISL_453658	13690	G	A	13690	29903	NSP12b	E75K	SNP	RNA-dependent RNA polymerase, post-ribosomal frameshift	NSP12b:E75K	G13690A
EPI_ISL_461910	13690	G	A	13690	29903	NSP12b	E75K	SNP	RNA-dependent RNA polymerase, post-ribosomal frameshift	NSP12b:E75K	G13690A
EPI_ISL_461911	13690	G	A	13690	29903	NSP12b	E75K	SNP	RNA-dependent RNA polymerase, post-ribosomal frameshift	NSP12b:E75K	G13690A
EPI_ISL_461919	13690	G	A	13690	29903	NSP12b	E75K	SNP	RNA-dependent RNA polymerase, post-ribosomal frameshift	NSP12b:E75K	G13690A
EPI_ISL_461920	13690	G	A	13690	29903	NSP12b	E75K	SNP	RNA-dependent RNA polymerase, post-ribosomal frameshift	NSP12b:E75K	G13690A
EPI_ISL_461959	13690	G	A	13690	29903	NSP12b	E75K	SNP	RNA-dependent RNA polymerase, post-ribosomal frameshift	NSP12b:E75K	G13690A
EPI_ISL_415618	13691	A	T	13613	29825	NSP12b	E75V	SNP	RNA-dependent RNA polymerase, post-ribosomal frameshift	NSP12b:E75V	A13691T
EPI_ISL_418068	13693	A	T	13479	29689	NSP12b	T76S	SNP	RNA-dependent RNA polymerase, post-ribosomal frameshift	NSP12b:T76S	A13693T
EPI_ISL_429620	13693	A	T	13662	29872	NSP12b	T76S	SNP	RNA-dependent RNA polymerase, post-ribosomal frameshift	NSP12b:T76S	A13693T
EPI_ISL_424277	13693	A	T	13644	29854	NSP12b	T76S	SNP	RNA-dependent RNA polymerase, post-ribosomal frameshift	NSP12b:T76S	A13693T
EPI_ISL_464566	13693	A	G	13693	29903	NSP12b	T76A	SNP	RNA-dependent RNA polymerase, post-ribosomal frameshift	NSP12b:T76A	A13693G
EPI_ISL_424275	13693	A	T	13564	29773	NSP12b	T76S	SNP	RNA-dependent RNA polymerase, post-ribosomal frameshift	NSP12b:T76S	A13693T
EPI_ISL_415610	13693	A	T	13428	29645	NSP12b	T76S	SNP	RNA-dependent RNA polymerase, post-ribosomal frameshift	NSP12b:T76S	A13693T
EPI_ISL_418877	13693	A	T	13662	29870	NSP12b	T76S	SNP	RNA-dependent RNA polymerase, post-ribosomal frameshift	NSP12b:T76S	A13693T
EPI_ISL_418885	13693	A	T	13389	29599	NSP12b	T76S	SNP	RNA-dependent RNA polymerase, post-ribosomal frameshift	NSP12b:T76S	A13693T
EPI_ISL_424177	13693	A	T	13662	29872	NSP12b	T76S	SNP	RNA-dependent RNA polymerase, post-ribosomal frameshift	NSP12b:T76S	A13693T
EPI_ISL_439466	13694	C	T	13640	29782	NSP12b	T76I	SNP	RNA-dependent RNA polymerase, post-ribosomal frameshift	NSP12b:T76I	C13694T
EPI_ISL_425804	13694	C	T	13640	29812	NSP12b	T76I	SNP	RNA-dependent RNA polymerase, post-ribosomal frameshift	NSP12b:T76I	C13694T
EPI_ISL_448383	13694	C	T	13693	29902	NSP12b	T76I	SNP	RNA-dependent RNA polymerase, post-ribosomal frameshift	NSP12b:T76I	C13694T
EPI_ISL_448385	13694	C	T	13664	29873	NSP12b	T76I	SNP	RNA-dependent RNA polymerase, post-ribosomal frameshift	NSP12b:T76I	C13694T
EPI_ISL_448982	13694	C	T	13664	29873	NSP12b	T76I	SNP	RNA-dependent RNA polymerase, post-ribosomal frameshift	NSP12b:T76I	C13694T
EPI_ISL_448991	13694	C	T	13690	29899	NSP12b	T76I	SNP	RNA-dependent RNA polymerase, post-ribosomal frameshift	NSP12b:T76I	C13694T
EPI_ISL_449005	13694	C	T	13690	29899	NSP12b	T76I	SNP	RNA-dependent RNA polymerase, post-ribosomal frameshift	NSP12b:T76I	C13694T
EPI_ISL_449008	13694	C	T	13686	29895	NSP12b	T76I	SNP	RNA-dependent RNA polymerase, post-ribosomal frameshift	NSP12b:T76I	C13694T
EPI_ISL_449081	13694	C	T	13683	29892	NSP12b	T76I	SNP	RNA-dependent RNA polymerase, post-ribosomal frameshift	NSP12b:T76I	C13694T
EPI_ISL_449100	13694	C	T	13664	29873	NSP12b	T76I	SNP	RNA-dependent RNA polymerase, post-ribosomal frameshift	NSP12b:T76I	C13694T
EPI_ISL_449119	13694	C	T	13692	29901	NSP12b	T76I	SNP	RNA-dependent RNA polymerase, post-ribosomal frameshift	NSP12b:T76I	C13694T
EPI_ISL_449133	13694	C	T	13684	29893	NSP12b	T76I	SNP	RNA-dependent RNA polymerase, post-ribosomal frameshift	NSP12b:T76I	C13694T
EPI_ISL_449145	13694	C	T	13683	29892	NSP12b	T76I	SNP	RNA-dependent RNA polymerase, post-ribosomal frameshift	NSP12b:T76I	C13694T
EPI_ISL_449151	13694	C	T	13694	29903	NSP12b	T76I	SNP	RNA-dependent RNA polymerase, post-ribosomal frameshift	NSP12b:T76I	C13694T
EPI_ISL_449175	13694	C	T	13664	29873	NSP12b	T76I	SNP	RNA-dependent RNA polymerase, post-ribosomal frameshift	NSP12b:T76I	C13694T
EPI_ISL_452978	13694	C	T	13694	29903	NSP12b	T76I	SNP	RNA-dependent RNA polymerase, post-ribosomal frameshift	NSP12b:T76I	C13694T
EPI_ISL_452986	13694	C	T	13694	29903	NSP12b	T76I	SNP	RNA-dependent RNA polymerase, post-ribosomal frameshift	NSP12b:T76I	C13694T
EPI_ISL_453569	13694	C	T	13664	29873	NSP12b	T76I	SNP	RNA-dependent RNA polymerase, post-ribosomal frameshift	NSP12b:T76I	C13694T
EPI_ISL_453570	13694	C	T	13685	29894	NSP12b	T76I	SNP	RNA-dependent RNA polymerase, post-ribosomal frameshift	NSP12b:T76I	C13694T
EPI_ISL_453588	13694	C	T	13690	29899	NSP12b	T76I	SNP	RNA-dependent RNA polymerase, post-ribosomal frameshift	NSP12b:T76I	C13694T
EPI_ISL_453919	13694	C	T	13544	29588	NSP12b	T76I	SNP	RNA-dependent RNA polymerase, post-ribosomal frameshift	NSP12b:T76I	C13694T
EPI_ISL_457402	13694	C	T	13669	29878	NSP12b	T76I	SNP	RNA-dependent RNA polymerase, post-ribosomal frameshift	NSP12b:T76I	C13694T
EPI_ISL_459997	13694	C	T	13694	29903	NSP12b	T76I	SNP	RNA-dependent RNA polymerase, post-ribosomal frameshift	NSP12b:T76I	C13694T
EPI_ISL_469897	13694	C	T	13640	29782	NSP12b	T76I	SNP	RNA-dependent RNA polymerase, post-ribosomal frameshift	NSP12b:T76I	C13694T
EPI_ISL_469903	13694	C	T	13640	29782	NSP12b	T76I	SNP	RNA-dependent RNA polymerase, post-ribosomal frameshift	NSP12b:T76I	C13694T
EPI_ISL_469911	13694	C	T	13640	29782	NSP12b	T76I	SNP	RNA-dependent RNA polymerase, post-ribosomal frameshift	NSP12b:T76I	C13694T
EPI_ISL_413855	13694	C	T	13694	29903	NSP12b	T76I	SNP	RNA-dependent RNA polymerase, post-ribosomal frameshift	NSP12b:T76I	C13694T
EPI_ISL_413862	13694	C	T	13694	29903	NSP12b	T76I	SNP	RNA-dependent RNA polymerase, post-ribosomal frameshift	NSP12b:T76I	C13694T
EPI_ISL_418993	13694	C	T	13694	29890	NSP12b	T76I	SNP	RNA-dependent RNA polymerase, post-ribosomal frameshift	NSP12b:T76I	C13694T
EPI_ISL_448368	13694	C	T	13664	29873	NSP12b	T76I	SNP	RNA-dependent RNA polymerase, post-ribosomal frameshift	NSP12b:T76I	C13694T
EPI_ISL_430589	13701	T	C	13698	29900	NSP12b	Y78Y	SNP_silent	RNA-dependent RNA polymerase, post-ribosomal frameshift	NSP12b:Y78Y	T13701C
EPI_ISL_425251	13703	A	G	13703	29903	NSP12b	N79S	SNP	RNA-dependent RNA polymerase, post-ribosomal frameshift	NSP12b:N79S	A13703G
EPI_ISL_458084	13703	A	G	13678	29863	NSP12b	N79S	SNP	RNA-dependent RNA polymerase, post-ribosomal frameshift	NSP12b:N79S	A13703G
EPI_ISL_458085	13703	A	G	13679	29835	NSP12b	N79S	SNP	RNA-dependent RNA polymerase, post-ribosomal frameshift	NSP12b:N79S	A13703G
EPI_ISL_473236	13704	T	C	13701	29900	NSP12b	N79N	SNP_silent	RNA-dependent RNA polymerase, post-ribosomal frameshift	NSP12b:N79N	T13704C
EPI_ISL_469811	13707	A	G	13653	29782	NSP12b	L80L	SNP_silent	RNA-dependent RNA polymerase, post-ribosomal frameshift	NSP12b:L80L	A13707G
EPI_ISL_430406	13711	A	G	13711	29903	NSP12b	K82E	SNP	RNA-dependent RNA polymerase, post-ribosomal frameshift	NSP12b:K82E	A13711G
EPI_ISL_466282	13711	A	G	13711	29903	NSP12b	K82E	SNP	RNA-dependent RNA polymerase, post-ribosomal frameshift	NSP12b:K82E	A13711G
EPI_ISL_463026	13711	A	G	13711	29814	NSP12b	K82E	SNP	RNA-dependent RNA polymerase, post-ribosomal frameshift	NSP12b:K82E	A13711G
EPI_ISL_418022	13712	A	G	13672	29763	NSP12b	K82R	SNP	RNA-dependent RNA polymerase, post-ribosomal frameshift	NSP12b:K82R	A13712G
EPI_ISL_426499	13712	A	G	13712	29882	NSP12b	K82R	SNP	RNA-dependent RNA polymerase, post-ribosomal frameshift	NSP12b:K82R	A13712G
EPI_ISL_444314	13712	A	G	13712	29903	NSP12b	K82R	SNP	RNA-dependent RNA polymerase, post-ribosomal frameshift	NSP12b:K82R	A13712G
EPI_ISL_444315	13712	A	G	13712	29903	NSP12b	K82R	SNP	RNA-dependent RNA polymerase, post-ribosomal frameshift	NSP12b:K82R	A13712G
EPI_ISL_447508	13712	A	G	13665	29789	NSP12b	K82R	SNP	RNA-dependent RNA polymerase, post-ribosomal frameshift	NSP12b:K82R	A13712G
EPI_ISL_468499	13712	A	G	13712	29903	NSP12b	K82R	SNP	RNA-dependent RNA polymerase, post-ribosomal frameshift	NSP12b:K82R	A13712G
EPI_ISL_423289	13712	A	G	13712	29903	NSP12b	K82R	SNP	RNA-dependent RNA polymerase, post-ribosomal frameshift	NSP12b:K82R	A13712G
EPI_ISL_434594	13712	A	G	13677	29868	NSP12b	K82R	SNP	RNA-dependent RNA polymerase, post-ribosomal frameshift	NSP12b:K82R	A13712G
EPI_ISL_434595	13712	A	G	13702	29893	NSP12b	K82R	SNP	RNA-dependent RNA polymerase, post-ribosomal frameshift	NSP12b:K82R	A13712G
EPI_ISL_434249	13712	A	G	13712	29903	NSP12b	K82R	SNP	RNA-dependent RNA polymerase, post-ribosomal frameshift	NSP12b:K82R	A13712G
EPI_ISL_438141	13712	A	G	13712	29903	NSP12b	K82R	SNP	RNA-dependent RNA polymerase, post-ribosomal frameshift	NSP12b:K82R	A13712G
EPI_ISL_458096	13713	G	T	13713	29903	NSP12b	K82N	SNP	RNA-dependent RNA polymerase, post-ribosomal frameshift	NSP12b:K82N	G13713T
EPI_ISL_449294	13716	T	C	13716	29903	NSP12b	D83D	SNP_silent	RNA-dependent RNA polymerase, post-ribosomal frameshift	NSP12b:D83D	T13716C
EPI_ISL_473855	13716	T	C	13716	29903	NSP12b	D83D	SNP_silent	RNA-dependent RNA polymerase, post-ribosomal frameshift	NSP12b:D83D	T13716C
EPI_ISL_421998	13716	T	C	13713	29901	NSP12b	D83D	SNP_silent	RNA-dependent RNA polymerase, post-ribosomal frameshift	NSP12b:D83D	T13716C
EPI_ISL_423586	13716	T	C	13713	29900	NSP12b	D83D	SNP_silent	RNA-dependent RNA polymerase, post-ribosomal frameshift	NSP12b:D83D	T13716C
EPI_ISL_461746	13717	T	A	13717	29903	NSP12b	C84S	SNP	RNA-dependent RNA polymerase, post-ribosomal frameshift	NSP12b:C84S	T13717A
EPI_ISL_461756	13717	T	A	13717	29903	NSP12b	C84S	SNP	RNA-dependent RNA polymerase, post-ribosomal frameshift	NSP12b:C84S	T13717A
EPI_ISL_461757	13717	T	A	13717	29903	NSP12b	C84S	SNP	RNA-dependent RNA polymerase, post-ribosomal frameshift	NSP12b:C84S	T13717A
EPI_ISL_473827	13717	T	A	13717	29903	NSP12b	C84S	SNP	RNA-dependent RNA polymerase, post-ribosomal frameshift	NSP12b:C84S	T13717A
EPI_ISL_473843	13717	T	A	13717	29903	NSP12b	C84S	SNP	RNA-dependent RNA polymerase, post-ribosomal frameshift	NSP12b:C84S	T13717A
EPI_ISL_473844	13717	T	A	13717	29903	NSP12b	C84S	SNP	RNA-dependent RNA polymerase, post-ribosomal frameshift	NSP12b:C84S	T13717A
EPI_ISL_454539	13720	C	T	13720	29903	NSP12b	P85S	SNP	RNA-dependent RNA polymerase, post-ribosomal frameshift	NSP12b:P85S	C13720T
EPI_ISL_445859	13721	C	T	13718	29875	NSP12b	P85L	SNP	RNA-dependent RNA polymerase, post-ribosomal frameshift	NSP12b:P85L	C13721T
EPI_ISL_445945	13721	C	T	13705	29887	NSP12b	P85L	SNP	RNA-dependent RNA polymerase, post-ribosomal frameshift	NSP12b:P85L	C13721T
EPI_ISL_446642	13721	C	T	13718	29875	NSP12b	P85L	SNP	RNA-dependent RNA polymerase, post-ribosomal frameshift	NSP12b:P85L	C13721T
EPI_ISL_446760	13721	C	T	13691	29848	NSP12b	P85L	SNP	RNA-dependent RNA polymerase, post-ribosomal frameshift	NSP12b:P85L	C13721T
EPI_ISL_446770	13721	C	T	13683	29840	NSP12b	P85L	SNP	RNA-dependent RNA polymerase, post-ribosomal frameshift	NSP12b:P85L	C13721T
EPI_ISL_446801	13721	C	T	13717	29874	NSP12b	P85L	SNP	RNA-dependent RNA polymerase, post-ribosomal frameshift	NSP12b:P85L	C13721T
EPI_ISL_446955	13721	C	T	13705	29862	NSP12b	P85L	SNP	RNA-dependent RNA polymerase, post-ribosomal frameshift	NSP12b:P85L	C13721T
EPI_ISL_446991	13721	C	T	13683	29840	NSP12b	P85L	SNP	RNA-dependent RNA polymerase, post-ribosomal frameshift	NSP12b:P85L	C13721T
EPI_ISL_460770	13721	C	T	13667	29775	NSP12b	P85L	SNP	RNA-dependent RNA polymerase, post-ribosomal frameshift	NSP12b:P85L	C13721T
EPI_ISL_472977	13721	C	T	13683	29840	NSP12b	P85L	SNP	RNA-dependent RNA polymerase, post-ribosomal frameshift	NSP12b:P85L	C13721T
EPI_ISL_474611	13721	C	T	13721	29878	NSP12b	P85L	SNP	RNA-dependent RNA polymerase, post-ribosomal frameshift	NSP12b:P85L	C13721T
EPI_ISL_474665	13721	C	T	13718	29875	NSP12b	P85L	SNP	RNA-dependent RNA polymerase, post-ribosomal frameshift	NSP12b:P85L	C13721T
EPI_ISL_474737	13721	C	T	13717	29874	NSP12b	P85L	SNP	RNA-dependent RNA polymerase, post-ribosomal frameshift	NSP12b:P85L	C13721T
EPI_ISL_419913	13721	C	T	13684	29866	NSP12b	P85L	SNP	RNA-dependent RNA polymerase, post-ribosomal frameshift	NSP12b:P85L	C13721T
EPI_ISL_447762	13723	G	T	13661	29716	NSP12b	A86S	SNP	RNA-dependent RNA polymerase, post-ribosomal frameshift	NSP12b:A86S	G13723T
EPI_ISL_436674	13723	G	A	13720	29900	NSP12b	A86T	SNP	RNA-dependent RNA polymerase, post-ribosomal frameshift	NSP12b:A86T	G13723A
EPI_ISL_436678	13723	G	A	13710	29861	NSP12b	A86T	SNP	RNA-dependent RNA polymerase, post-ribosomal frameshift	NSP12b:A86T	G13723A
EPI_ISL_436680	13723	G	A	13723	29903	NSP12b	A86T	SNP	RNA-dependent RNA polymerase, post-ribosomal frameshift	NSP12b:A86T	G13723A
EPI_ISL_451666	13724	C	T	13724	29899	NSP12b	A86V	SNP	RNA-dependent RNA polymerase, post-ribosomal frameshift	NSP12b:A86V	C13724T
EPI_ISL_420681	13724	C	T	13721	29900	NSP12b	A86V	SNP	RNA-dependent RNA polymerase, post-ribosomal frameshift	NSP12b:A86V	C13724T
EPI_ISL_420682	13724	C	T	13721	29900	NSP12b	A86V	SNP	RNA-dependent RNA polymerase, post-ribosomal frameshift	NSP12b:A86V	C13724T
EPI_ISL_420683	13724	C	T	13721	29900	NSP12b	A86V	SNP	RNA-dependent RNA polymerase, post-ribosomal frameshift	NSP12b:A86V	C13724T
EPI_ISL_437757	13728	T	C	13728	29903	NSP12b	V87V	SNP_silent	RNA-dependent RNA polymerase, post-ribosomal frameshift	NSP12b:V87V	T13728C
EPI_ISL_450332	13730	C	T	13723	29852	NSP12b	A88V	SNP	RNA-dependent RNA polymerase, post-ribosomal frameshift	NSP12b:A88V	C13730T
EPI_ISL_436435	13730	C	T	13730	29866	NSP12b	A88V	SNP	RNA-dependent RNA polymerase, post-ribosomal frameshift	NSP12b:A88V	C13730T
EPI_ISL_470878	13730	C	T	13730	29903	NSP12b	A88V	SNP	RNA-dependent RNA polymerase, post-ribosomal frameshift	NSP12b:A88V	C13730T
EPI_ISL_430956	13730	C	T	13700	29830	NSP12b	A88V	SNP	RNA-dependent RNA polymerase, post-ribosomal frameshift	NSP12b:A88V	C13730T
EPI_ISL_462411	13730	C	T	13730	29891	NSP12b	A88V	SNP	RNA-dependent RNA polymerase, post-ribosomal frameshift	NSP12b:A88V	C13730T
EPI_ISL_447573	13730	C	T	13695	29868	NSP12b	A88V	SNP	RNA-dependent RNA polymerase, post-ribosomal frameshift	NSP12b:A88V	C13730T
EPI_ISL_447579	13730	C	T	13694	29867	NSP12b	A88V	SNP	RNA-dependent RNA polymerase, post-ribosomal frameshift	NSP12b:A88V	C13730T
EPI_ISL_462379	13730	C	T	13730	29891	NSP12b	A88V	SNP	RNA-dependent RNA polymerase, post-ribosomal frameshift	NSP12b:A88V	C13730T
EPI_ISL_434952	13730	C	T	13730	29903	NSP12b	A88V	SNP	RNA-dependent RNA polymerase, post-ribosomal frameshift	NSP12b:A88V	C13730T
EPI_ISL_443237	13730	C	T	13730	29891	NSP12b	A88V	SNP	RNA-dependent RNA polymerase, post-ribosomal frameshift	NSP12b:A88V	C13730T
EPI_ISL_467827	13730	C	T	13676	29782	NSP12b	A88V	SNP	RNA-dependent RNA polymerase, post-ribosomal frameshift	NSP12b:A88V	C13730T
EPI_ISL_417920	13730	C	T	13730	29903	NSP12b	A88V	SNP	RNA-dependent RNA polymerase, post-ribosomal frameshift	NSP12b:A88V	C13730T
EPI_ISL_435077	13730	C	T	13730	29866	NSP12b	A88V	SNP	RNA-dependent RNA polymerase, post-ribosomal frameshift	NSP12b:A88V	C13730T
EPI_ISL_469108	13730	C	T	13730	29891	NSP12b	A88V	SNP	RNA-dependent RNA polymerase, post-ribosomal frameshift	NSP12b:A88V	C13730T
EPI_ISL_469102	13730	C	T	13730	29891	NSP12b	A88V	SNP	RNA-dependent RNA polymerase, post-ribosomal frameshift	NSP12b:A88V	C13730T
EPI_ISL_469115	13730	C	T	13730	29891	NSP12b	A88V	SNP	RNA-dependent RNA polymerase, post-ribosomal frameshift	NSP12b:A88V	C13730T
EPI_ISL_469116	13730	C	T	13730	29891	NSP12b	A88V	SNP	RNA-dependent RNA polymerase, post-ribosomal frameshift	NSP12b:A88V	C13730T
EPI_ISL_436450	13730	C	T	13730	29889	NSP12b	A88V	SNP	RNA-dependent RNA polymerase, post-ribosomal frameshift	NSP12b:A88V	C13730T
EPI_ISL_447622	13730	C	T	13730	29870	NSP12b	A88V	SNP	RNA-dependent RNA polymerase, post-ribosomal frameshift	NSP12b:A88V	C13730T
EPI_ISL_452178	13730	C	T	13729	29900	NSP12b	A88V	SNP	RNA-dependent RNA polymerase, post-ribosomal frameshift	NSP12b:A88V	C13730T
EPI_ISL_452179	13730	C	T	13723	29895	NSP12b	A88V	SNP	RNA-dependent RNA polymerase, post-ribosomal frameshift	NSP12b:A88V	C13730T
EPI_ISL_434556	13730	C	T	13730	29871	NSP12b	A88V	SNP	RNA-dependent RNA polymerase, post-ribosomal frameshift	NSP12b:A88V	C13730T
EPI_ISL_416420	13730	C	T	13730	29903	NSP12b	A88V	SNP	RNA-dependent RNA polymerase, post-ribosomal frameshift	NSP12b:A88V	C13730T
EPI_ISL_419528	13730	C	T	13730	29903	NSP12b	A88V	SNP	RNA-dependent RNA polymerase, post-ribosomal frameshift	NSP12b:A88V	C13730T
EPI_ISL_420088	13730	C	T	13730	29903	NSP12b	A88V	SNP	RNA-dependent RNA polymerase, post-ribosomal frameshift	NSP12b:A88V	C13730T
EPI_ISL_421856	13730	C	T	13730	29903	NSP12b	A88V	SNP	RNA-dependent RNA polymerase, post-ribosomal frameshift	NSP12b:A88V	C13730T
EPI_ISL_421860	13730	C	T	13730	29903	NSP12b	A88V	SNP	RNA-dependent RNA polymerase, post-ribosomal frameshift	NSP12b:A88V	C13730T
EPI_ISL_421861	13730	C	T	13730	29903	NSP12b	A88V	SNP	RNA-dependent RNA polymerase, post-ribosomal frameshift	NSP12b:A88V	C13730T
EPI_ISL_421958	13730	C	T	13730	29903	NSP12b	A88V	SNP	RNA-dependent RNA polymerase, post-ribosomal frameshift	NSP12b:A88V	C13730T
EPI_ISL_421964	13730	C	T	13730	29903	NSP12b	A88V	SNP	RNA-dependent RNA polymerase, post-ribosomal frameshift	NSP12b:A88V	C13730T
EPI_ISL_422537	13730	C	T	13666	29694	NSP12b	A88V	SNP	RNA-dependent RNA polymerase, post-ribosomal frameshift	NSP12b:A88V	C13730T
EPI_ISL_423390	13730	C	T	13730	29903	NSP12b	A88V	SNP	RNA-dependent RNA polymerase, post-ribosomal frameshift	NSP12b:A88V	C13730T
EPI_ISL_423415	13730	C	T	13730	29903	NSP12b	A88V	SNP	RNA-dependent RNA polymerase, post-ribosomal frameshift	NSP12b:A88V	C13730T
EPI_ISL_423427	13730	C	T	13730	29903	NSP12b	A88V	SNP	RNA-dependent RNA polymerase, post-ribosomal frameshift	NSP12b:A88V	C13730T
EPI_ISL_423567	13730	C	T	13730	29903	NSP12b	A88V	SNP	RNA-dependent RNA polymerase, post-ribosomal frameshift	NSP12b:A88V	C13730T
EPI_ISL_423570	13730	C	T	13730	29903	NSP12b	A88V	SNP	RNA-dependent RNA polymerase, post-ribosomal frameshift	NSP12b:A88V	C13730T
EPI_ISL_425286	13730	C	T	13730	29903	NSP12b	A88V	SNP	RNA-dependent RNA polymerase, post-ribosomal frameshift	NSP12b:A88V	C13730T
EPI_ISL_425456	13730	C	T	13730	29903	NSP12b	A88V	SNP	RNA-dependent RNA polymerase, post-ribosomal frameshift	NSP12b:A88V	C13730T
EPI_ISL_428386	13730	C	T	13730	29903	NSP12b	A88V	SNP	RNA-dependent RNA polymerase, post-ribosomal frameshift	NSP12b:A88V	C13730T
EPI_ISL_430467	13730	C	T	13715	29856	NSP12b	A88V	SNP	RNA-dependent RNA polymerase, post-ribosomal frameshift	NSP12b:A88V	C13730T
EPI_ISL_431080	13730	C	T	13730	29903	NSP12b	A88V	SNP	RNA-dependent RNA polymerase, post-ribosomal frameshift	NSP12b:A88V	C13730T
EPI_ISL_432008	13730	C	T	13692	29865	NSP12b	A88V	SNP	RNA-dependent RNA polymerase, post-ribosomal frameshift	NSP12b:A88V	C13730T
EPI_ISL_433064	13730	C	T	13730	29903	NSP12b	A88V	SNP	RNA-dependent RNA polymerase, post-ribosomal frameshift	NSP12b:A88V	C13730T
EPI_ISL_433466	13730	C	T	13730	29903	NSP12b	A88V	SNP	RNA-dependent RNA polymerase, post-ribosomal frameshift	NSP12b:A88V	C13730T
EPI_ISL_433944	13730	C	T	13730	29903	NSP12b	A88V	SNP	RNA-dependent RNA polymerase, post-ribosomal frameshift	NSP12b:A88V	C13730T
EPI_ISL_433952	13730	C	T	13730	29903	NSP12b	A88V	SNP	RNA-dependent RNA polymerase, post-ribosomal frameshift	NSP12b:A88V	C13730T
EPI_ISL_434009	13730	C	T	13730	29903	NSP12b	A88V	SNP	RNA-dependent RNA polymerase, post-ribosomal frameshift	NSP12b:A88V	C13730T
EPI_ISL_434024	13730	C	T	13730	29903	NSP12b	A88V	SNP	RNA-dependent RNA polymerase, post-ribosomal frameshift	NSP12b:A88V	C13730T
EPI_ISL_437454	13730	C	T	13730	29903	NSP12b	A88V	SNP	RNA-dependent RNA polymerase, post-ribosomal frameshift	NSP12b:A88V	C13730T
EPI_ISL_437539	13730	C	T	13730	29903	NSP12b	A88V	SNP	RNA-dependent RNA polymerase, post-ribosomal frameshift	NSP12b:A88V	C13730T
EPI_ISL_438307	13730	C	T	13676	29812	NSP12b	A88V	SNP	RNA-dependent RNA polymerase, post-ribosomal frameshift	NSP12b:A88V	C13730T
EPI_ISL_438358	13730	C	T	13673	29779	NSP12b	A88V	SNP	RNA-dependent RNA polymerase, post-ribosomal frameshift	NSP12b:A88V	C13730T
EPI_ISL_438481	13730	C	T	13676	29782	NSP12b	A88V	SNP	RNA-dependent RNA polymerase, post-ribosomal frameshift	NSP12b:A88V	C13730T
EPI_ISL_438537	13730	C	T	13676	29782	NSP12b	A88V	SNP	RNA-dependent RNA polymerase, post-ribosomal frameshift	NSP12b:A88V	C13730T
EPI_ISL_438579	13730	C	T	13730	29903	NSP12b	A88V	SNP	RNA-dependent RNA polymerase, post-ribosomal frameshift	NSP12b:A88V	C13730T
EPI_ISL_438586	13730	C	T	13730	29903	NSP12b	A88V	SNP	RNA-dependent RNA polymerase, post-ribosomal frameshift	NSP12b:A88V	C13730T
EPI_ISL_438601	13730	C	T	13730	29903	NSP12b	A88V	SNP	RNA-dependent RNA polymerase, post-ribosomal frameshift	NSP12b:A88V	C13730T
EPI_ISL_438665	13730	C	T	13730	29903	NSP12b	A88V	SNP	RNA-dependent RNA polymerase, post-ribosomal frameshift	NSP12b:A88V	C13730T
EPI_ISL_438700	13730	C	T	13730	29903	NSP12b	A88V	SNP	RNA-dependent RNA polymerase, post-ribosomal frameshift	NSP12b:A88V	C13730T
EPI_ISL_438719	13730	C	T	13730	29903	NSP12b	A88V	SNP	RNA-dependent RNA polymerase, post-ribosomal frameshift	NSP12b:A88V	C13730T
EPI_ISL_438730	13730	C	T	13730	29903	NSP12b	A88V	SNP	RNA-dependent RNA polymerase, post-ribosomal frameshift	NSP12b:A88V	C13730T
EPI_ISL_439416	13730	C	T	13676	29849	NSP12b	A88V	SNP	RNA-dependent RNA polymerase, post-ribosomal frameshift	NSP12b:A88V	C13730T
EPI_ISL_439423	13730	C	T	13673	29846	NSP12b	A88V	SNP	RNA-dependent RNA polymerase, post-ribosomal frameshift	NSP12b:A88V	C13730T
EPI_ISL_439473	13730	C	T	13676	29812	NSP12b	A88V	SNP	RNA-dependent RNA polymerase, post-ribosomal frameshift	NSP12b:A88V	C13730T
EPI_ISL_439571	13730	C	T	13676	29812	NSP12b	A88V	SNP	RNA-dependent RNA polymerase, post-ribosomal frameshift	NSP12b:A88V	C13730T
EPI_ISL_439672	13730	C	T	13730	29903	NSP12b	A88V	SNP	RNA-dependent RNA polymerase, post-ribosomal frameshift	NSP12b:A88V	C13730T
EPI_ISL_439731	13730	C	T	13730	29903	NSP12b	A88V	SNP	RNA-dependent RNA polymerase, post-ribosomal frameshift	NSP12b:A88V	C13730T
EPI_ISL_440017	13730	C	T	13676	29782	NSP12b	A88V	SNP	RNA-dependent RNA polymerase, post-ribosomal frameshift	NSP12b:A88V	C13730T
EPI_ISL_440184	13730	C	T	13676	29849	NSP12b	A88V	SNP	RNA-dependent RNA polymerase, post-ribosomal frameshift	NSP12b:A88V	C13730T
EPI_ISL_440203	13730	C	T	13676	29782	NSP12b	A88V	SNP	RNA-dependent RNA polymerase, post-ribosomal frameshift	NSP12b:A88V	C13730T
EPI_ISL_440213	13730	C	T	13676	29782	NSP12b	A88V	SNP	RNA-dependent RNA polymerase, post-ribosomal frameshift	NSP12b:A88V	C13730T
EPI_ISL_440574	13730	C	T	13676	29832	NSP12b	A88V	SNP	RNA-dependent RNA polymerase, post-ribosomal frameshift	NSP12b:A88V	C13730T
EPI_ISL_441140	13730	C	T	13676	29849	NSP12b	A88V	SNP	RNA-dependent RNA polymerase, post-ribosomal frameshift	NSP12b:A88V	C13730T
EPI_ISL_441164	13730	C	T	13676	29812	NSP12b	A88V	SNP	RNA-dependent RNA polymerase, post-ribosomal frameshift	NSP12b:A88V	C13730T
EPI_ISL_441173	13730	C	T	13676	29812	NSP12b	A88V	SNP	RNA-dependent RNA polymerase, post-ribosomal frameshift	NSP12b:A88V	C13730T
EPI_ISL_441256	13730	C	T	13676	29782	NSP12b	A88V	SNP	RNA-dependent RNA polymerase, post-ribosomal frameshift	NSP12b:A88V	C13730T
EPI_ISL_441317	13730	C	T	13676	29801	NSP12b	A88V	SNP	RNA-dependent RNA polymerase, post-ribosomal frameshift	NSP12b:A88V	C13730T
EPI_ISL_441563	13730	C	T	13676	29813	NSP12b	A88V	SNP	RNA-dependent RNA polymerase, post-ribosomal frameshift	NSP12b:A88V	C13730T
EPI_ISL_441571	13730	C	T	13676	29849	NSP12b	A88V	SNP	RNA-dependent RNA polymerase, post-ribosomal frameshift	NSP12b:A88V	C13730T
EPI_ISL_441597	13730	C	T	13676	29783	NSP12b	A88V	SNP	RNA-dependent RNA polymerase, post-ribosomal frameshift	NSP12b:A88V	C13730T
EPI_ISL_441643	13730	C	T	13676	29812	NSP12b	A88V	SNP	RNA-dependent RNA polymerase, post-ribosomal frameshift	NSP12b:A88V	C13730T
EPI_ISL_441687	13730	C	T	13727	29900	NSP12b	A88V	SNP	RNA-dependent RNA polymerase, post-ribosomal frameshift	NSP12b:A88V	C13730T
EPI_ISL_441818	13730	C	T	13676	29812	NSP12b	A88V	SNP	RNA-dependent RNA polymerase, post-ribosomal frameshift	NSP12b:A88V	C13730T
EPI_ISL_441843	13730	C	T	13676	29782	NSP12b	A88V	SNP	RNA-dependent RNA polymerase, post-ribosomal frameshift	NSP12b:A88V	C13730T
EPI_ISL_442050	13730	C	T	13676	29812	NSP12b	A88V	SNP	RNA-dependent RNA polymerase, post-ribosomal frameshift	NSP12b:A88V	C13730T
EPI_ISL_442061	13730	C	T	13676	29812	NSP12b	A88V	SNP	RNA-dependent RNA polymerase, post-ribosomal frameshift	NSP12b:A88V	C13730T
EPI_ISL_442130	13730	C	T	13676	29849	NSP12b	A88V	SNP	RNA-dependent RNA polymerase, post-ribosomal frameshift	NSP12b:A88V	C13730T
EPI_ISL_442174	13730	C	T	13673	29779	NSP12b	A88V	SNP	RNA-dependent RNA polymerase, post-ribosomal frameshift	NSP12b:A88V	C13730T
EPI_ISL_442233	13730	C	T	13676	29782	NSP12b	A88V	SNP	RNA-dependent RNA polymerase, post-ribosomal frameshift	NSP12b:A88V	C13730T
EPI_ISL_442321	13730	C	T	13676	29846	NSP12b	A88V	SNP	RNA-dependent RNA polymerase, post-ribosomal frameshift	NSP12b:A88V	C13730T
EPI_ISL_442334	13730	C	T	13676	29849	NSP12b	A88V	SNP	RNA-dependent RNA polymerase, post-ribosomal frameshift	NSP12b:A88V	C13730T
EPI_ISL_442537	13730	C	T	13673	29779	NSP12b	A88V	SNP	RNA-dependent RNA polymerase, post-ribosomal frameshift	NSP12b:A88V	C13730T
EPI_ISL_442557	13730	C	T	13676	29849	NSP12b	A88V	SNP	RNA-dependent RNA polymerase, post-ribosomal frameshift	NSP12b:A88V	C13730T
EPI_ISL_442822	13730	C	T	13676	29811	NSP12b	A88V	SNP	RNA-dependent RNA polymerase, post-ribosomal frameshift	NSP12b:A88V	C13730T
EPI_ISL_442837	13730	C	T	13676	29782	NSP12b	A88V	SNP	RNA-dependent RNA polymerase, post-ribosomal frameshift	NSP12b:A88V	C13730T
EPI_ISL_442903	13730	C	T	13676	29782	NSP12b	A88V	SNP	RNA-dependent RNA polymerase, post-ribosomal frameshift	NSP12b:A88V	C13730T
EPI_ISL_442907	13730	C	T	13676	29849	NSP12b	A88V	SNP	RNA-dependent RNA polymerase, post-ribosomal frameshift	NSP12b:A88V	C13730T
EPI_ISL_442924	13730	C	T	13676	29849	NSP12b	A88V	SNP	RNA-dependent RNA polymerase, post-ribosomal frameshift	NSP12b:A88V	C13730T
EPI_ISL_442927	13730	C	T	13676	29849	NSP12b	A88V	SNP	RNA-dependent RNA polymerase, post-ribosomal frameshift	NSP12b:A88V	C13730T
EPI_ISL_442955	13730	C	T	13676	29849	NSP12b	A88V	SNP	RNA-dependent RNA polymerase, post-ribosomal frameshift	NSP12b:A88V	C13730T
EPI_ISL_442990	13730	C	T	13676	29782	NSP12b	A88V	SNP	RNA-dependent RNA polymerase, post-ribosomal frameshift	NSP12b:A88V	C13730T
EPI_ISL_443021	13730	C	T	13676	29782	NSP12b	A88V	SNP	RNA-dependent RNA polymerase, post-ribosomal frameshift	NSP12b:A88V	C13730T
EPI_ISL_443358	13730	C	T	13676	29849	NSP12b	A88V	SNP	RNA-dependent RNA polymerase, post-ribosomal frameshift	NSP12b:A88V	C13730T
EPI_ISL_443359	13730	C	T	13676	29849	NSP12b	A88V	SNP	RNA-dependent RNA polymerase, post-ribosomal frameshift	NSP12b:A88V	C13730T
EPI_ISL_443377	13730	C	T	13676	29849	NSP12b	A88V	SNP	RNA-dependent RNA polymerase, post-ribosomal frameshift	NSP12b:A88V	C13730T
EPI_ISL_443385	13730	C	T	13676	29812	NSP12b	A88V	SNP	RNA-dependent RNA polymerase, post-ribosomal frameshift	NSP12b:A88V	C13730T
EPI_ISL_443399	13730	C	T	13676	29782	NSP12b	A88V	SNP	RNA-dependent RNA polymerase, post-ribosomal frameshift	NSP12b:A88V	C13730T
EPI_ISL_443426	13730	C	T	13676	29849	NSP12b	A88V	SNP	RNA-dependent RNA polymerase, post-ribosomal frameshift	NSP12b:A88V	C13730T
EPI_ISL_443434	13730	C	T	13676	29849	NSP12b	A88V	SNP	RNA-dependent RNA polymerase, post-ribosomal frameshift	NSP12b:A88V	C13730T
EPI_ISL_443498	13730	C	T	13676	29782	NSP12b	A88V	SNP	RNA-dependent RNA polymerase, post-ribosomal frameshift	NSP12b:A88V	C13730T
EPI_ISL_443507	13730	C	T	13676	29782	NSP12b	A88V	SNP	RNA-dependent RNA polymerase, post-ribosomal frameshift	NSP12b:A88V	C13730T
EPI_ISL_443516	13730	C	T	13676	29849	NSP12b	A88V	SNP	RNA-dependent RNA polymerase, post-ribosomal frameshift	NSP12b:A88V	C13730T
EPI_ISL_443557	13730	C	T	13676	29849	NSP12b	A88V	SNP	RNA-dependent RNA polymerase, post-ribosomal frameshift	NSP12b:A88V	C13730T
EPI_ISL_443563	13730	C	T	13676	29849	NSP12b	A88V	SNP	RNA-dependent RNA polymerase, post-ribosomal frameshift	NSP12b:A88V	C13730T
EPI_ISL_443591	13730	C	T	13728	29864	NSP12b	A88V	SNP	RNA-dependent RNA polymerase, post-ribosomal frameshift	NSP12b:A88V	C13730T
EPI_ISL_443622	13730	C	T	13676	29849	NSP12b	A88V	SNP	RNA-dependent RNA polymerase, post-ribosomal frameshift	NSP12b:A88V	C13730T
EPI_ISL_443627	13730	C	T	13676	29782	NSP12b	A88V	SNP	RNA-dependent RNA polymerase, post-ribosomal frameshift	NSP12b:A88V	C13730T
EPI_ISL_443628	13730	C	T	13676	29812	NSP12b	A88V	SNP	RNA-dependent RNA polymerase, post-ribosomal frameshift	NSP12b:A88V	C13730T
EPI_ISL_443637	13730	C	T	13676	29782	NSP12b	A88V	SNP	RNA-dependent RNA polymerase, post-ribosomal frameshift	NSP12b:A88V	C13730T
EPI_ISL_443664	13730	C	T	13676	29782	NSP12b	A88V	SNP	RNA-dependent RNA polymerase, post-ribosomal frameshift	NSP12b:A88V	C13730T
EPI_ISL_444326	13730	C	T	13730	29903	NSP12b	A88V	SNP	RNA-dependent RNA polymerase, post-ribosomal frameshift	NSP12b:A88V	C13730T
EPI_ISL_444334	13730	C	T	13730	29903	NSP12b	A88V	SNP	RNA-dependent RNA polymerase, post-ribosomal frameshift	NSP12b:A88V	C13730T
EPI_ISL_444336	13730	C	T	13730	29903	NSP12b	A88V	SNP	RNA-dependent RNA polymerase, post-ribosomal frameshift	NSP12b:A88V	C13730T
EPI_ISL_444357	13730	C	T	13730	29903	NSP12b	A88V	SNP	RNA-dependent RNA polymerase, post-ribosomal frameshift	NSP12b:A88V	C13730T
EPI_ISL_444364	13730	C	T	13730	29903	NSP12b	A88V	SNP	RNA-dependent RNA polymerase, post-ribosomal frameshift	NSP12b:A88V	C13730T
EPI_ISL_444402	13730	C	T	13730	29903	NSP12b	A88V	SNP	RNA-dependent RNA polymerase, post-ribosomal frameshift	NSP12b:A88V	C13730T
EPI_ISL_444407	13730	C	T	13730	29903	NSP12b	A88V	SNP	RNA-dependent RNA polymerase, post-ribosomal frameshift	NSP12b:A88V	C13730T
EPI_ISL_444409	13730	C	T	13730	29903	NSP12b	A88V	SNP	RNA-dependent RNA polymerase, post-ribosomal frameshift	NSP12b:A88V	C13730T
EPI_ISL_444414	13730	C	T	13730	29903	NSP12b	A88V	SNP	RNA-dependent RNA polymerase, post-ribosomal frameshift	NSP12b:A88V	C13730T
EPI_ISL_444419	13730	C	T	13730	29903	NSP12b	A88V	SNP	RNA-dependent RNA polymerase, post-ribosomal frameshift	NSP12b:A88V	C13730T
EPI_ISL_444436	13730	C	T	13730	29903	NSP12b	A88V	SNP	RNA-dependent RNA polymerase, post-ribosomal frameshift	NSP12b:A88V	C13730T
EPI_ISL_444446	13730	C	T	13730	29903	NSP12b	A88V	SNP	RNA-dependent RNA polymerase, post-ribosomal frameshift	NSP12b:A88V	C13730T
EPI_ISL_447568	13730	C	T	13692	29865	NSP12b	A88V	SNP	RNA-dependent RNA polymerase, post-ribosomal frameshift	NSP12b:A88V	C13730T
EPI_ISL_447765	13730	C	T	13675	29724	NSP12b	A88V	SNP	RNA-dependent RNA polymerase, post-ribosomal frameshift	NSP12b:A88V	C13730T
EPI_ISL_447958	13730	C	T	13730	29903	NSP12b	A88V	SNP	RNA-dependent RNA polymerase, post-ribosomal frameshift	NSP12b:A88V	C13730T
EPI_ISL_448063	13730	C	T	13730	29903	NSP12b	A88V	SNP	RNA-dependent RNA polymerase, post-ribosomal frameshift	NSP12b:A88V	C13730T
EPI_ISL_448493	13730	C	T	13730	29903	NSP12b	A88V	SNP	RNA-dependent RNA polymerase, post-ribosomal frameshift	NSP12b:A88V	C13730T
EPI_ISL_453037	13730	C	T	13730	29903	NSP12b	A88V	SNP	RNA-dependent RNA polymerase, post-ribosomal frameshift	NSP12b:A88V	C13730T
EPI_ISL_453276	13730	C	T	13718	29854	NSP12b	A88V	SNP	RNA-dependent RNA polymerase, post-ribosomal frameshift	NSP12b:A88V	C13730T
EPI_ISL_453381	13730	C	T	13727	29863	NSP12b	A88V	SNP	RNA-dependent RNA polymerase, post-ribosomal frameshift	NSP12b:A88V	C13730T
EPI_ISL_455644	13730	C	T	13730	29903	NSP12b	A88V	SNP	RNA-dependent RNA polymerase, post-ribosomal frameshift	NSP12b:A88V	C13730T
EPI_ISL_455660	13730	C	T	13730	29903	NSP12b	A88V	SNP	RNA-dependent RNA polymerase, post-ribosomal frameshift	NSP12b:A88V	C13730T
EPI_ISL_455665	13730	C	T	13730	29903	NSP12b	A88V	SNP	RNA-dependent RNA polymerase, post-ribosomal frameshift	NSP12b:A88V	C13730T
EPI_ISL_455678	13730	C	T	13730	29903	NSP12b	A88V	SNP	RNA-dependent RNA polymerase, post-ribosomal frameshift	NSP12b:A88V	C13730T
EPI_ISL_456675	13730	C	T	13730	29903	NSP12b	A88V	SNP	RNA-dependent RNA polymerase, post-ribosomal frameshift	NSP12b:A88V	C13730T
EPI_ISL_456933	13730	C	T	13730	29903	NSP12b	A88V	SNP	RNA-dependent RNA polymerase, post-ribosomal frameshift	NSP12b:A88V	C13730T
EPI_ISL_457769	13730	C	T	13730	29903	NSP12b	A88V	SNP	RNA-dependent RNA polymerase, post-ribosomal frameshift	NSP12b:A88V	C13730T
EPI_ISL_458583	13730	C	T	13676	29783	NSP12b	A88V	SNP	RNA-dependent RNA polymerase, post-ribosomal frameshift	NSP12b:A88V	C13730T
EPI_ISL_458584	13730	C	T	13676	29782	NSP12b	A88V	SNP	RNA-dependent RNA polymerase, post-ribosomal frameshift	NSP12b:A88V	C13730T
EPI_ISL_458611	13730	C	T	13676	29782	NSP12b	A88V	SNP	RNA-dependent RNA polymerase, post-ribosomal frameshift	NSP12b:A88V	C13730T
EPI_ISL_458647	13730	C	T	13676	29782	NSP12b	A88V	SNP	RNA-dependent RNA polymerase, post-ribosomal frameshift	NSP12b:A88V	C13730T
EPI_ISL_459271	13730	C	T	13673	29779	NSP12b	A88V	SNP	RNA-dependent RNA polymerase, post-ribosomal frameshift	NSP12b:A88V	C13730T
EPI_ISL_459428	13730	C	T	13676	29782	NSP12b	A88V	SNP	RNA-dependent RNA polymerase, post-ribosomal frameshift	NSP12b:A88V	C13730T
EPI_ISL_459435	13730	C	T	13676	29783	NSP12b	A88V	SNP	RNA-dependent RNA polymerase, post-ribosomal frameshift	NSP12b:A88V	C13730T
EPI_ISL_459487	13730	C	T	13676	29782	NSP12b	A88V	SNP	RNA-dependent RNA polymerase, post-ribosomal frameshift	NSP12b:A88V	C13730T
EPI_ISL_459496	13730	C	T	13676	29782	NSP12b	A88V	SNP	RNA-dependent RNA polymerase, post-ribosomal frameshift	NSP12b:A88V	C13730T
EPI_ISL_460153	13730	C	T	13709	29842	NSP12b	A88V	SNP	RNA-dependent RNA polymerase, post-ribosomal frameshift	NSP12b:A88V	C13730T
EPI_ISL_460246	13730	C	T	13681	29813	NSP12b	A88V	SNP	RNA-dependent RNA polymerase, post-ribosomal frameshift	NSP12b:A88V	C13730T
EPI_ISL_461626	13730	C	T	13730	29903	NSP12b	A88V	SNP	RNA-dependent RNA polymerase, post-ribosomal frameshift	NSP12b:A88V	C13730T
EPI_ISL_462319	13730	C	T	13730	29891	NSP12b	A88V	SNP	RNA-dependent RNA polymerase, post-ribosomal frameshift	NSP12b:A88V	C13730T
EPI_ISL_462414	13730	C	T	13730	29891	NSP12b	A88V	SNP	RNA-dependent RNA polymerase, post-ribosomal frameshift	NSP12b:A88V	C13730T
EPI_ISL_463056	13730	C	T	13730	29688	NSP12b	A88V	SNP	RNA-dependent RNA polymerase, post-ribosomal frameshift	NSP12b:A88V	C13730T
EPI_ISL_465708	13730	C	T	13730	29903	NSP12b	A88V	SNP	RNA-dependent RNA polymerase, post-ribosomal frameshift	NSP12b:A88V	C13730T
EPI_ISL_466334	13730	C	T	13730	29903	NSP12b	A88V	SNP	RNA-dependent RNA polymerase, post-ribosomal frameshift	NSP12b:A88V	C13730T
EPI_ISL_469126	13730	C	T	13730	29891	NSP12b	A88V	SNP	RNA-dependent RNA polymerase, post-ribosomal frameshift	NSP12b:A88V	C13730T
EPI_ISL_469129	13730	C	T	13730	29891	NSP12b	A88V	SNP	RNA-dependent RNA polymerase, post-ribosomal frameshift	NSP12b:A88V	C13730T
EPI_ISL_469154	13730	C	T	13730	29891	NSP12b	A88V	SNP	RNA-dependent RNA polymerase, post-ribosomal frameshift	NSP12b:A88V	C13730T
EPI_ISL_469195	13730	C	T	13676	29782	NSP12b	A88V	SNP	RNA-dependent RNA polymerase, post-ribosomal frameshift	NSP12b:A88V	C13730T
EPI_ISL_470123	13730	C	T	13676	29782	NSP12b	A88V	SNP	RNA-dependent RNA polymerase, post-ribosomal frameshift	NSP12b:A88V	C13730T
EPI_ISL_470127	13730	C	T	13676	29782	NSP12b	A88V	SNP	RNA-dependent RNA polymerase, post-ribosomal frameshift	NSP12b:A88V	C13730T
EPI_ISL_470140	13730	C	T	13676	29782	NSP12b	A88V	SNP	RNA-dependent RNA polymerase, post-ribosomal frameshift	NSP12b:A88V	C13730T
EPI_ISL_470159	13730	C	T	13676	29782	NSP12b	A88V	SNP	RNA-dependent RNA polymerase, post-ribosomal frameshift	NSP12b:A88V	C13730T
EPI_ISL_470209	13730	C	T	13676	29782	NSP12b	A88V	SNP	RNA-dependent RNA polymerase, post-ribosomal frameshift	NSP12b:A88V	C13730T
EPI_ISL_470223	13730	C	T	13676	29782	NSP12b	A88V	SNP	RNA-dependent RNA polymerase, post-ribosomal frameshift	NSP12b:A88V	C13730T
EPI_ISL_470231	13730	C	T	13676	29782	NSP12b	A88V	SNP	RNA-dependent RNA polymerase, post-ribosomal frameshift	NSP12b:A88V	C13730T
EPI_ISL_470242	13730	C	T	13676	29782	NSP12b	A88V	SNP	RNA-dependent RNA polymerase, post-ribosomal frameshift	NSP12b:A88V	C13730T
EPI_ISL_470274	13730	C	T	13676	29782	NSP12b	A88V	SNP	RNA-dependent RNA polymerase, post-ribosomal frameshift	NSP12b:A88V	C13730T
EPI_ISL_470286	13730	C	T	13676	29782	NSP12b	A88V	SNP	RNA-dependent RNA polymerase, post-ribosomal frameshift	NSP12b:A88V	C13730T
EPI_ISL_470327	13730	C	T	13673	29779	NSP12b	A88V	SNP	RNA-dependent RNA polymerase, post-ribosomal frameshift	NSP12b:A88V	C13730T
EPI_ISL_470407	13730	C	T	13676	29782	NSP12b	A88V	SNP	RNA-dependent RNA polymerase, post-ribosomal frameshift	NSP12b:A88V	C13730T
EPI_ISL_470431	13730	C	T	13676	29782	NSP12b	A88V	SNP	RNA-dependent RNA polymerase, post-ribosomal frameshift	NSP12b:A88V	C13730T
EPI_ISL_470483	13730	C	T	13676	29782	NSP12b	A88V	SNP	RNA-dependent RNA polymerase, post-ribosomal frameshift	NSP12b:A88V	C13730T
EPI_ISL_470514	13730	C	T	13676	29782	NSP12b	A88V	SNP	RNA-dependent RNA polymerase, post-ribosomal frameshift	NSP12b:A88V	C13730T
EPI_ISL_472198	13730	C	T	13730	29903	NSP12b	A88V	SNP	RNA-dependent RNA polymerase, post-ribosomal frameshift	NSP12b:A88V	C13730T
EPI_ISL_473879	13730	C	T	13730	29903	NSP12b	A88V	SNP	RNA-dependent RNA polymerase, post-ribosomal frameshift	NSP12b:A88V	C13730T
EPI_ISL_473900	13730	C	T	13730	29903	NSP12b	A88V	SNP	RNA-dependent RNA polymerase, post-ribosomal frameshift	NSP12b:A88V	C13730T
EPI_ISL_426956	13730	C	T	13730	29903	NSP12b	A88V	SNP	RNA-dependent RNA polymerase, post-ribosomal frameshift	NSP12b:A88V	C13730T
EPI_ISL_469112	13730	C	T	13730	29891	NSP12b	A88V	SNP	RNA-dependent RNA polymerase, post-ribosomal frameshift	NSP12b:A88V	C13730T
EPI_ISL_462309	13730	C	T	13730	29891	NSP12b	A88V	SNP	RNA-dependent RNA polymerase, post-ribosomal frameshift	NSP12b:A88V	C13730T
EPI_ISL_463025	13730	C	T	13730	29689	NSP12b	A88V	SNP	RNA-dependent RNA polymerase, post-ribosomal frameshift	NSP12b:A88V	C13730T
EPI_ISL_463046	13730	C	T	13730	29061	NSP12b	A88V	SNP	RNA-dependent RNA polymerase, post-ribosomal frameshift	NSP12b:A88V	C13730T
EPI_ISL_463049	13730	C	T	13730	29686	NSP12b	A88V	SNP	RNA-dependent RNA polymerase, post-ribosomal frameshift	NSP12b:A88V	C13730T
EPI_ISL_463051	13730	C	T	13730	29788	NSP12b	A88V	SNP	RNA-dependent RNA polymerase, post-ribosomal frameshift	NSP12b:A88V	C13730T
EPI_ISL_447572	13730	C	T	13691	29864	NSP12b	A88V	SNP	RNA-dependent RNA polymerase, post-ribosomal frameshift	NSP12b:A88V	C13730T
EPI_ISL_447866	13730	C	T	13700	29834	NSP12b	A88V	SNP	RNA-dependent RNA polymerase, post-ribosomal frameshift	NSP12b:A88V	C13730T
EPI_ISL_436427	13730	C	T	13730	29694	NSP12b	A88V	SNP	RNA-dependent RNA polymerase, post-ribosomal frameshift	NSP12b:A88V	C13730T
EPI_ISL_447853	13730	C	T	13692	29822	NSP12b	A88V	SNP	RNA-dependent RNA polymerase, post-ribosomal frameshift	NSP12b:A88V	C13730T
EPI_ISL_462427	13730	C	T	13730	29891	NSP12b	A88V	SNP	RNA-dependent RNA polymerase, post-ribosomal frameshift	NSP12b:A88V	C13730T
EPI_ISL_469096	13730	C	T	13730	29891	NSP12b	A88V	SNP	RNA-dependent RNA polymerase, post-ribosomal frameshift	NSP12b:A88V	C13730T
EPI_ISL_436423	13730	C	T	13730	29694	NSP12b	A88V	SNP	RNA-dependent RNA polymerase, post-ribosomal frameshift	NSP12b:A88V	C13730T
EPI_ISL_447849	13730	C	T	13692	29822	NSP12b	A88V	SNP	RNA-dependent RNA polymerase, post-ribosomal frameshift	NSP12b:A88V	C13730T
EPI_ISL_450787	13730	C	T	13730	29903	NSP12b	A88V	SNP	RNA-dependent RNA polymerase, post-ribosomal frameshift	NSP12b:A88V	C13730T
EPI_ISL_462320	13730	C	T	13730	29891	NSP12b	A88V	SNP	RNA-dependent RNA polymerase, post-ribosomal frameshift	NSP12b:A88V	C13730T
EPI_ISL_454865	13730	C	T	13730	29903	NSP12b	A88V	SNP	RNA-dependent RNA polymerase, post-ribosomal frameshift	NSP12b:A88V	C13730T
EPI_ISL_434557	13730	C	T	13730	29871	NSP12b	A88V	SNP	RNA-dependent RNA polymerase, post-ribosomal frameshift	NSP12b:A88V	C13730T
EPI_ISL_462419	13730	C	T	13730	29891	NSP12b	A88V	SNP	RNA-dependent RNA polymerase, post-ribosomal frameshift	NSP12b:A88V	C13730T
EPI_ISL_469138	13730	C	T	13730	29891	NSP12b	A88V	SNP	RNA-dependent RNA polymerase, post-ribosomal frameshift	NSP12b:A88V	C13730T
EPI_ISL_419932	13730	C	T	13693	29866	NSP12b	A88V	SNP	RNA-dependent RNA polymerase, post-ribosomal frameshift	NSP12b:A88V	C13730T
EPI_ISL_451666	13730	C	T	13730	29899	NSP12b	A88V	SNP	RNA-dependent RNA polymerase, post-ribosomal frameshift	NSP12b:A88V	C13730T
EPI_ISL_428843	13730	C	T	13728	29889	NSP12b	A88V	SNP	RNA-dependent RNA polymerase, post-ribosomal frameshift	NSP12b:A88V	C13730T
EPI_ISL_435088	13730	C	T	13730	29866	NSP12b	A88V	SNP	RNA-dependent RNA polymerase, post-ribosomal frameshift	NSP12b:A88V	C13730T
EPI_ISL_436137	13730	C	T	13730	29903	NSP12b	A88V	SNP	RNA-dependent RNA polymerase, post-ribosomal frameshift	NSP12b:A88V	C13730T
EPI_ISL_447559	13730	C	T	13712	29853	NSP12b	A88V	SNP	RNA-dependent RNA polymerase, post-ribosomal frameshift	NSP12b:A88V	C13730T
EPI_ISL_447852	13730	C	T	13692	29822	NSP12b	A88V	SNP	RNA-dependent RNA polymerase, post-ribosomal frameshift	NSP12b:A88V	C13730T
EPI_ISL_454568	13730	C	T	13730	29903	NSP12b	A88V	SNP	RNA-dependent RNA polymerase, post-ribosomal frameshift	NSP12b:A88V	C13730T
EPI_ISL_463038	13730	C	T	13730	29767	NSP12b	A88V	SNP	RNA-dependent RNA polymerase, post-ribosomal frameshift	NSP12b:A88V	C13730T
EPI_ISL_463041	13730	C	T	13730	29432	NSP12b	A88V	SNP	RNA-dependent RNA polymerase, post-ribosomal frameshift	NSP12b:A88V	C13730T
EPI_ISL_422407	13730	C	T	13730	29870	NSP12b	A88V	SNP	RNA-dependent RNA polymerase, post-ribosomal frameshift	NSP12b:A88V	C13730T
EPI_ISL_471964	13730	C	T	13730	29903	NSP12b	A88V	SNP	RNA-dependent RNA polymerase, post-ribosomal frameshift	NSP12b:A88V	C13730T
EPI_ISL_447558	13730	C	T	13692	29865	NSP12b	A88V	SNP	RNA-dependent RNA polymerase, post-ribosomal frameshift	NSP12b:A88V	C13730T
EPI_ISL_435089	13730	C	T	13730	29866	NSP12b	A88V	SNP	RNA-dependent RNA polymerase, post-ribosomal frameshift	NSP12b:A88V	C13730T
EPI_ISL_462318	13730	C	T	13730	29891	NSP12b	A88V	SNP	RNA-dependent RNA polymerase, post-ribosomal frameshift	NSP12b:A88V	C13730T
EPI_ISL_469148	13730	C	T	13730	29891	NSP12b	A88V	SNP	RNA-dependent RNA polymerase, post-ribosomal frameshift	NSP12b:A88V	C13730T
EPI_ISL_462340	13730	C	T	13730	29891	NSP12b	A88V	SNP	RNA-dependent RNA polymerase, post-ribosomal frameshift	NSP12b:A88V	C13730T
EPI_ISL_462353	13730	C	T	13730	29891	NSP12b	A88V	SNP	RNA-dependent RNA polymerase, post-ribosomal frameshift	NSP12b:A88V	C13730T
EPI_ISL_462383	13730	C	T	13730	29891	NSP12b	A88V	SNP	RNA-dependent RNA polymerase, post-ribosomal frameshift	NSP12b:A88V	C13730T
EPI_ISL_447859	13730	C	T	13721	29851	NSP12b	A88V	SNP	RNA-dependent RNA polymerase, post-ribosomal frameshift	NSP12b:A88V	C13730T
EPI_ISL_462382	13730	C	T	13730	29891	NSP12b	A88V	SNP	RNA-dependent RNA polymerase, post-ribosomal frameshift	NSP12b:A88V	C13730T
EPI_ISL_463010	13730	C	T	13730	29688	NSP12b	A88V	SNP	RNA-dependent RNA polymerase, post-ribosomal frameshift	NSP12b:A88V	C13730T
EPI_ISL_462423	13730	C	T	13730	29891	NSP12b	A88V	SNP	RNA-dependent RNA polymerase, post-ribosomal frameshift	NSP12b:A88V	C13730T
EPI_ISL_462412	13730	C	T	13730	29891	NSP12b	A88V	SNP	RNA-dependent RNA polymerase, post-ribosomal frameshift	NSP12b:A88V	C13730T
EPI_ISL_435090	13730	C	T	13730	29867	NSP12b	A88V	SNP	RNA-dependent RNA polymerase, post-ribosomal frameshift	NSP12b:A88V	C13730T
EPI_ISL_435091	13730	C	T	13730	29867	NSP12b	A88V	SNP	RNA-dependent RNA polymerase, post-ribosomal frameshift	NSP12b:A88V	C13730T
EPI_ISL_436425	13730	C	T	13730	29867	NSP12b	A88V	SNP	RNA-dependent RNA polymerase, post-ribosomal frameshift	NSP12b:A88V	C13730T
EPI_ISL_436430	13730	C	T	13730	29866	NSP12b	A88V	SNP	RNA-dependent RNA polymerase, post-ribosomal frameshift	NSP12b:A88V	C13730T
EPI_ISL_447561	13730	C	T	13691	29864	NSP12b	A88V	SNP	RNA-dependent RNA polymerase, post-ribosomal frameshift	NSP12b:A88V	C13730T
EPI_ISL_447581	13730	C	T	13681	29854	NSP12b	A88V	SNP	RNA-dependent RNA polymerase, post-ribosomal frameshift	NSP12b:A88V	C13730T
EPI_ISL_447855	13730	C	T	13692	29822	NSP12b	A88V	SNP	RNA-dependent RNA polymerase, post-ribosomal frameshift	NSP12b:A88V	C13730T
EPI_ISL_454543	13730	C	T	13730	29903	NSP12b	A88V	SNP	RNA-dependent RNA polymerase, post-ribosomal frameshift	NSP12b:A88V	C13730T
EPI_ISL_454554	13730	C	T	13730	29903	NSP12b	A88V	SNP	RNA-dependent RNA polymerase, post-ribosomal frameshift	NSP12b:A88V	C13730T
EPI_ISL_447569	13730	C	T	13691	29864	NSP12b	A88V	SNP	RNA-dependent RNA polymerase, post-ribosomal frameshift	NSP12b:A88V	C13730T
EPI_ISL_447576	13730	C	T	13693	29866	NSP12b	A88V	SNP	RNA-dependent RNA polymerase, post-ribosomal frameshift	NSP12b:A88V	C13730T
EPI_ISL_450321	13730	C	T	13692	29821	NSP12b	A88V	SNP	RNA-dependent RNA polymerase, post-ribosomal frameshift	NSP12b:A88V	C13730T
EPI_ISL_436433	13730	C	T	13730	29866	NSP12b	A88V	SNP	RNA-dependent RNA polymerase, post-ribosomal frameshift	NSP12b:A88V	C13730T
EPI_ISL_436451	13730	C	T	13730	29866	NSP12b	A88V	SNP	RNA-dependent RNA polymerase, post-ribosomal frameshift	NSP12b:A88V	C13730T
EPI_ISL_437438	13730	C	T	13730	29903	NSP12b	A88V	SNP	RNA-dependent RNA polymerase, post-ribosomal frameshift	NSP12b:A88V	C13730T
EPI_ISL_447570	13730	C	T	13691	29864	NSP12b	A88V	SNP	RNA-dependent RNA polymerase, post-ribosomal frameshift	NSP12b:A88V	C13730T
EPI_ISL_447862	13730	C	T	13710	29840	NSP12b	A88V	SNP	RNA-dependent RNA polymerase, post-ribosomal frameshift	NSP12b:A88V	C13730T
EPI_ISL_447865	13730	C	T	13700	29834	NSP12b	A88V	SNP	RNA-dependent RNA polymerase, post-ribosomal frameshift	NSP12b:A88V	C13730T
EPI_ISL_450326	13730	C	T	13701	29830	NSP12b	A88V	SNP	RNA-dependent RNA polymerase, post-ribosomal frameshift	NSP12b:A88V	C13730T
EPI_ISL_452215	13730	C	T	13705	29805	NSP12b	A88V	SNP	RNA-dependent RNA polymerase, post-ribosomal frameshift	NSP12b:A88V	C13730T
EPI_ISL_455656	13730	C	T	13730	29903	NSP12b	A88V	SNP	RNA-dependent RNA polymerase, post-ribosomal frameshift	NSP12b:A88V	C13730T
EPI_ISL_458062	13730	C	T	13690	29824	NSP12b	A88V	SNP	RNA-dependent RNA polymerase, post-ribosomal frameshift	NSP12b:A88V	C13730T
EPI_ISL_458063	13730	C	T	13690	29824	NSP12b	A88V	SNP	RNA-dependent RNA polymerase, post-ribosomal frameshift	NSP12b:A88V	C13730T
EPI_ISL_458069	13730	C	T	13690	29824	NSP12b	A88V	SNP	RNA-dependent RNA polymerase, post-ribosomal frameshift	NSP12b:A88V	C13730T
EPI_ISL_458073	13730	C	T	13700	29839	NSP12b	A88V	SNP	RNA-dependent RNA polymerase, post-ribosomal frameshift	NSP12b:A88V	C13730T
EPI_ISL_458074	13730	C	T	13700	29839	NSP12b	A88V	SNP	RNA-dependent RNA polymerase, post-ribosomal frameshift	NSP12b:A88V	C13730T
EPI_ISL_458076	13730	C	T	13700	29839	NSP12b	A88V	SNP	RNA-dependent RNA polymerase, post-ribosomal frameshift	NSP12b:A88V	C13730T
EPI_ISL_463031	13730	C	T	13730	29685	NSP12b	A88V	SNP	RNA-dependent RNA polymerase, post-ribosomal frameshift	NSP12b:A88V	C13730T
EPI_ISL_471641	13730	C	T	13701	29840	NSP12b	A88V	SNP	RNA-dependent RNA polymerase, post-ribosomal frameshift	NSP12b:A88V	C13730T
EPI_ISL_471642	13730	C	T	13701	29840	NSP12b	A88V	SNP	RNA-dependent RNA polymerase, post-ribosomal frameshift	NSP12b:A88V	C13730T
EPI_ISL_471643	13730	C	T	13697	29833	NSP12b	A88V	SNP	RNA-dependent RNA polymerase, post-ribosomal frameshift	NSP12b:A88V	C13730T
EPI_ISL_474986	13730	C	T	13730	29903	NSP12b	A88V	SNP	RNA-dependent RNA polymerase, post-ribosomal frameshift	NSP12b:A88V	C13730T
EPI_ISL_475002	13730	C	T	13730	29903	NSP12b	A88V	SNP	RNA-dependent RNA polymerase, post-ribosomal frameshift	NSP12b:A88V	C13730T
EPI_ISL_475025	13730	C	T	13730	29903	NSP12b	A88V	SNP	RNA-dependent RNA polymerase, post-ribosomal frameshift	NSP12b:A88V	C13730T
EPI_ISL_462335	13730	C	T	13730	29891	NSP12b	A88V	SNP	RNA-dependent RNA polymerase, post-ribosomal frameshift	NSP12b:A88V	C13730T
EPI_ISL_451147	13730	C	T	13730	29903	NSP12b	A88V	SNP	RNA-dependent RNA polymerase, post-ribosomal frameshift	NSP12b:A88V	C13730T
EPI_ISL_455602	13730	C	T	13730	29903	NSP12b	A88V	SNP	RNA-dependent RNA polymerase, post-ribosomal frameshift	NSP12b:A88V	C13730T
EPI_ISL_435686	13730	C	T	13722	29816	NSP12b	A88V	SNP	RNA-dependent RNA polymerase, post-ribosomal frameshift	NSP12b:A88V	C13730T
EPI_ISL_462342	13730	C	T	13730	29891	NSP12b	A88V	SNP	RNA-dependent RNA polymerase, post-ribosomal frameshift	NSP12b:A88V	C13730T
EPI_ISL_462421	13730	C	T	13730	29891	NSP12b	A88V	SNP	RNA-dependent RNA polymerase, post-ribosomal frameshift	NSP12b:A88V	C13730T
EPI_ISL_462430	13730	C	T	13730	29891	NSP12b	A88V	SNP	RNA-dependent RNA polymerase, post-ribosomal frameshift	NSP12b:A88V	C13730T
EPI_ISL_469110	13730	C	T	13730	29891	NSP12b	A88V	SNP	RNA-dependent RNA polymerase, post-ribosomal frameshift	NSP12b:A88V	C13730T
EPI_ISL_436439	13730	C	T	13730	29866	NSP12b	A88V	SNP	RNA-dependent RNA polymerase, post-ribosomal frameshift	NSP12b:A88V	C13730T
EPI_ISL_436446	13730	C	T	13730	29866	NSP12b	A88V	SNP	RNA-dependent RNA polymerase, post-ribosomal frameshift	NSP12b:A88V	C13730T
EPI_ISL_436443	13730	C	T	13730	29866	NSP12b	A88V	SNP	RNA-dependent RNA polymerase, post-ribosomal frameshift	NSP12b:A88V	C13730T
EPI_ISL_454555	13730	C	T	13730	29903	NSP12b	A88V	SNP	RNA-dependent RNA polymerase, post-ribosomal frameshift	NSP12b:A88V	C13730T
EPI_ISL_459954	13730	C	T	13774	29928	NSP12b	A88V	SNP	RNA-dependent RNA polymerase, post-ribosomal frameshift	NSP12b:A88V	C13730T
EPI_ISL_419946	13730	C	T	13726	29899	NSP12b	A88V	SNP	RNA-dependent RNA polymerase, post-ribosomal frameshift	NSP12b:A88V	C13730T
EPI_ISL_443188	13730	C	T	13730	29891	NSP12b	A88V	SNP	RNA-dependent RNA polymerase, post-ribosomal frameshift	NSP12b:A88V	C13730T
EPI_ISL_451539	13730	C	T	13464	29408	NSP12b	A88V	SNP	RNA-dependent RNA polymerase, post-ribosomal frameshift	NSP12b:A88V	C13730T
EPI_ISL_462338	13730	C	T	13730	29834	NSP12b	A88V	SNP	RNA-dependent RNA polymerase, post-ribosomal frameshift	NSP12b:A88V	C13730T
EPI_ISL_447584	13730	C	T	13693	29866	NSP12b	A88V	SNP	RNA-dependent RNA polymerase, post-ribosomal frameshift	NSP12b:A88V	C13730T
EPI_ISL_447585	13730	C	T	13695	29868	NSP12b	A88V	SNP	RNA-dependent RNA polymerase, post-ribosomal frameshift	NSP12b:A88V	C13730T
EPI_ISL_447586	13730	C	T	13692	29865	NSP12b	A88V	SNP	RNA-dependent RNA polymerase, post-ribosomal frameshift	NSP12b:A88V	C13730T
EPI_ISL_447847	13730	C	T	13692	29822	NSP12b	A88V	SNP	RNA-dependent RNA polymerase, post-ribosomal frameshift	NSP12b:A88V	C13730T
EPI_ISL_434698	13730	C	T	13710	29804	NSP12b	A88V	SNP	RNA-dependent RNA polymerase, post-ribosomal frameshift	NSP12b:A88V	C13730T
EPI_ISL_447921	13730	C	T	13730	29899	NSP12b	A88V	SNP	RNA-dependent RNA polymerase, post-ribosomal frameshift	NSP12b:A88V	C13730T
EPI_ISL_455927	13730	C	T	13719	29892	NSP12b	A88V	SNP	RNA-dependent RNA polymerase, post-ribosomal frameshift	NSP12b:A88V	C13730T
EPI_ISL_417917	13730	C	T	13730	29903	NSP12b	A88V	SNP	RNA-dependent RNA polymerase, post-ribosomal frameshift	NSP12b:A88V	C13730T
EPI_ISL_463023	13730	C	T	13730	29682	NSP12b	A88V	SNP	RNA-dependent RNA polymerase, post-ribosomal frameshift	NSP12b:A88V	C13730T
EPI_ISL_435674	13730	C	T	13685	29705	NSP12b	A88V	SNP	RNA-dependent RNA polymerase, post-ribosomal frameshift	NSP12b:A88V	C13730T
EPI_ISL_435675	13730	C	T	13729	29837	NSP12b	A88V	SNP	RNA-dependent RNA polymerase, post-ribosomal frameshift	NSP12b:A88V	C13730T
EPI_ISL_443187	13730	C	T	13728	29859	NSP12b	A88V	SNP	RNA-dependent RNA polymerase, post-ribosomal frameshift	NSP12b:A88V	C13730T
EPI_ISL_462418	13730	C	T	13730	29891	NSP12b	A88V	SNP	RNA-dependent RNA polymerase, post-ribosomal frameshift	NSP12b:A88V	C13730T
EPI_ISL_435082	13730	C	T	13730	29866	NSP12b	A88V	SNP	RNA-dependent RNA polymerase, post-ribosomal frameshift	NSP12b:A88V	C13730T
EPI_ISL_436156	13730	C	T	13730	29903	NSP12b	A88V	SNP	RNA-dependent RNA polymerase, post-ribosomal frameshift	NSP12b:A88V	C13730T
EPI_ISL_436157	13730	C	T	13730	29903	NSP12b	A88V	SNP	RNA-dependent RNA polymerase, post-ribosomal frameshift	NSP12b:A88V	C13730T
EPI_ISL_456534	13730	C	T	13730	29903	NSP12b	A88V	SNP	RNA-dependent RNA polymerase, post-ribosomal frameshift	NSP12b:A88V	C13730T
EPI_ISL_456536	13730	C	T	13730	29903	NSP12b	A88V	SNP	RNA-dependent RNA polymerase, post-ribosomal frameshift	NSP12b:A88V	C13730T
EPI_ISL_428842	13730	C	T	13725	29886	NSP12b	A88V	SNP	RNA-dependent RNA polymerase, post-ribosomal frameshift	NSP12b:A88V	C13730T
EPI_ISL_443212	13730	C	T	13730	29891	NSP12b	A88V	SNP	RNA-dependent RNA polymerase, post-ribosomal frameshift	NSP12b:A88V	C13730T
EPI_ISL_462308	13730	C	T	13730	29891	NSP12b	A88V	SNP	RNA-dependent RNA polymerase, post-ribosomal frameshift	NSP12b:A88V	C13730T
EPI_ISL_462314	13730	C	T	13730	29891	NSP12b	A88V	SNP	RNA-dependent RNA polymerase, post-ribosomal frameshift	NSP12b:A88V	C13730T
EPI_ISL_462394	13730	C	T	13730	29891	NSP12b	A88V	SNP	RNA-dependent RNA polymerase, post-ribosomal frameshift	NSP12b:A88V	C13730T
EPI_ISL_462424	13730	C	T	13730	29891	NSP12b	A88V	SNP	RNA-dependent RNA polymerase, post-ribosomal frameshift	NSP12b:A88V	C13730T
EPI_ISL_469091	13730	C	T	13730	29891	NSP12b	A88V	SNP	RNA-dependent RNA polymerase, post-ribosomal frameshift	NSP12b:A88V	C13730T
EPI_ISL_469093	13730	C	T	13730	29891	NSP12b	A88V	SNP	RNA-dependent RNA polymerase, post-ribosomal frameshift	NSP12b:A88V	C13730T
EPI_ISL_469131	13730	C	T	13730	29891	NSP12b	A88V	SNP	RNA-dependent RNA polymerase, post-ribosomal frameshift	NSP12b:A88V	C13730T
EPI_ISL_469152	13730	C	T	13730	29891	NSP12b	A88V	SNP	RNA-dependent RNA polymerase, post-ribosomal frameshift	NSP12b:A88V	C13730T
EPI_ISL_456462	13730	C	T	13730	29903	NSP12b	A88V	SNP	RNA-dependent RNA polymerase, post-ribosomal frameshift	NSP12b:A88V	C13730T
EPI_ISL_456502	13730	C	T	13730	29903	NSP12b	A88V	SNP	RNA-dependent RNA polymerase, post-ribosomal frameshift	NSP12b:A88V	C13730T
EPI_ISL_469144	13730	C	T	13730	29891	NSP12b	A88V	SNP	RNA-dependent RNA polymerase, post-ribosomal frameshift	NSP12b:A88V	C13730T
EPI_ISL_462343	13730	C	T	13730	29891	NSP12b	A88V	SNP	RNA-dependent RNA polymerase, post-ribosomal frameshift	NSP12b:A88V	C13730T
EPI_ISL_431783	13730	C	T	13714	29845	NSP12b	A88V	SNP	RNA-dependent RNA polymerase, post-ribosomal frameshift	NSP12b:A88V	C13730T
EPI_ISL_431784	13730	C	T	13715	29859	NSP12b	A88V	SNP	RNA-dependent RNA polymerase, post-ribosomal frameshift	NSP12b:A88V	C13730T
EPI_ISL_426700	13730	C	T	13714	29887	NSP12b	A88V	SNP	RNA-dependent RNA polymerase, post-ribosomal frameshift	NSP12b:A88V	C13730T
EPI_ISL_426767	13730	C	T	13730	29903	NSP12b	A88V	SNP	RNA-dependent RNA polymerase, post-ribosomal frameshift	NSP12b:A88V	C13730T
EPI_ISL_436440	13730	C	T	13730	29866	NSP12b	A88V	SNP	RNA-dependent RNA polymerase, post-ribosomal frameshift	NSP12b:A88V	C13730T
EPI_ISL_436436	13730	C	T	13730	29866	NSP12b	A88V	SNP	RNA-dependent RNA polymerase, post-ribosomal frameshift	NSP12b:A88V	C13730T
EPI_ISL_469095	13730	C	T	13730	29891	NSP12b	A88V	SNP	RNA-dependent RNA polymerase, post-ribosomal frameshift	NSP12b:A88V	C13730T
EPI_ISL_451487	13730	C	T	13464	29408	NSP12b	A88V	SNP	RNA-dependent RNA polymerase, post-ribosomal frameshift	NSP12b:A88V	C13730T
EPI_ISL_451488	13730	C	T	13464	29408	NSP12b	A88V	SNP	RNA-dependent RNA polymerase, post-ribosomal frameshift	NSP12b:A88V	C13730T
EPI_ISL_447858	13730	C	T	13692	29822	NSP12b	A88V	SNP	RNA-dependent RNA polymerase, post-ribosomal frameshift	NSP12b:A88V	C13730T
EPI_ISL_458072	13730	C	T	13700	29839	NSP12b	A88V	SNP	RNA-dependent RNA polymerase, post-ribosomal frameshift	NSP12b:A88V	C13730T
EPI_ISL_471585	13730	C	T	13701	29840	NSP12b	A88V	SNP	RNA-dependent RNA polymerase, post-ribosomal frameshift	NSP12b:A88V	C13730T
EPI_ISL_435087	13730	C	T	13730	29866	NSP12b	A88V	SNP	RNA-dependent RNA polymerase, post-ribosomal frameshift	NSP12b:A88V	C13730T
EPI_ISL_462322	13730	C	T	13730	29891	NSP12b	A88V	SNP	RNA-dependent RNA polymerase, post-ribosomal frameshift	NSP12b:A88V	C13730T
EPI_ISL_462326	13730	C	T	13730	29891	NSP12b	A88V	SNP	RNA-dependent RNA polymerase, post-ribosomal frameshift	NSP12b:A88V	C13730T
EPI_ISL_462327	13730	C	T	13730	29891	NSP12b	A88V	SNP	RNA-dependent RNA polymerase, post-ribosomal frameshift	NSP12b:A88V	C13730T
EPI_ISL_437442	13730	C	T	13730	29903	NSP12b	A88V	SNP	RNA-dependent RNA polymerase, post-ribosomal frameshift	NSP12b:A88V	C13730T
EPI_ISL_431833	13730	C	T	13730	29871	NSP12b	A88V	SNP	RNA-dependent RNA polymerase, post-ribosomal frameshift	NSP12b:A88V	C13730T
EPI_ISL_454552	13730	C	T	13730	29903	NSP12b	A88V	SNP	RNA-dependent RNA polymerase, post-ribosomal frameshift	NSP12b:A88V	C13730T
EPI_ISL_447864	13730	C	T	13695	29825	NSP12b	A88V	SNP	RNA-dependent RNA polymerase, post-ribosomal frameshift	NSP12b:A88V	C13730T
EPI_ISL_469089	13730	C	T	13730	29891	NSP12b	A88V	SNP	RNA-dependent RNA polymerase, post-ribosomal frameshift	NSP12b:A88V	C13730T
EPI_ISL_416449	13730	C	T	13433	29605	NSP12b	A88V	SNP	RNA-dependent RNA polymerase, post-ribosomal frameshift	NSP12b:A88V	C13730T
EPI_ISL_435695	13730	C	T	13701	29862	NSP12b	A88V	SNP	RNA-dependent RNA polymerase, post-ribosomal frameshift	NSP12b:A88V	C13730T
EPI_ISL_451154	13730	C	T	13730	29903	NSP12b	A88V	SNP	RNA-dependent RNA polymerase, post-ribosomal frameshift	NSP12b:A88V	C13730T
EPI_ISL_451156	13730	C	T	13730	29903	NSP12b	A88V	SNP	RNA-dependent RNA polymerase, post-ribosomal frameshift	NSP12b:A88V	C13730T
EPI_ISL_451159	13730	C	T	13730	29903	NSP12b	A88V	SNP	RNA-dependent RNA polymerase, post-ribosomal frameshift	NSP12b:A88V	C13730T
EPI_ISL_451161	13730	C	T	13730	29903	NSP12b	A88V	SNP	RNA-dependent RNA polymerase, post-ribosomal frameshift	NSP12b:A88V	C13730T
EPI_ISL_452793	13730	C	T	13700	29833	NSP12b	A88V	SNP	RNA-dependent RNA polymerase, post-ribosomal frameshift	NSP12b:A88V	C13730T
EPI_ISL_469141	13730	C	T	13730	29891	NSP12b	A88V	SNP	RNA-dependent RNA polymerase, post-ribosomal frameshift	NSP12b:A88V	C13730T
EPI_ISL_434555	13730	C	T	13729	29869	NSP12b	A88V	SNP	RNA-dependent RNA polymerase, post-ribosomal frameshift	NSP12b:A88V	C13730T
EPI_ISL_455048	13730	C	T	13464	29408	NSP12b	A88V	SNP	RNA-dependent RNA polymerase, post-ribosomal frameshift	NSP12b:A88V	C13730T
EPI_ISL_463020	13730	C	T	13730	29180	NSP12b	A88V	SNP	RNA-dependent RNA polymerase, post-ribosomal frameshift	NSP12b:A88V	C13730T
EPI_ISL_467838	13730	C	T	13676	29782	NSP12b	A88V	SNP	RNA-dependent RNA polymerase, post-ribosomal frameshift	NSP12b:A88V	C13730T
EPI_ISL_467841	13730	C	T	13676	29782	NSP12b	A88V	SNP	RNA-dependent RNA polymerase, post-ribosomal frameshift	NSP12b:A88V	C13730T
EPI_ISL_454541	13730	C	T	13730	29903	NSP12b	A88V	SNP	RNA-dependent RNA polymerase, post-ribosomal frameshift	NSP12b:A88V	C13730T
EPI_ISL_427706	13730	C	T	13466	29412	NSP12b	A88V	SNP	RNA-dependent RNA polymerase, post-ribosomal frameshift	NSP12b:A88V	C13730T
EPI_ISL_468973	13730	C	T	13730	29903	NSP12b	A88V	SNP	RNA-dependent RNA polymerase, post-ribosomal frameshift	NSP12b:A88V	C13730T
EPI_ISL_456598	13730	C	T	13730	29903	NSP12b	A88V	SNP	RNA-dependent RNA polymerase, post-ribosomal frameshift	NSP12b:A88V	C13730T
EPI_ISL_454544	13730	C	T	13730	29903	NSP12b	A88V	SNP	RNA-dependent RNA polymerase, post-ribosomal frameshift	NSP12b:A88V	C13730T
EPI_ISL_435683	13730	C	T	13683	29753	NSP12b	A88V	SNP	RNA-dependent RNA polymerase, post-ribosomal frameshift	NSP12b:A88V	C13730T
EPI_ISL_443190	13730	C	T	13730	29891	NSP12b	A88V	SNP	RNA-dependent RNA polymerase, post-ribosomal frameshift	NSP12b:A88V	C13730T
EPI_ISL_462381	13730	C	T	13730	29891	NSP12b	A88V	SNP	RNA-dependent RNA polymerase, post-ribosomal frameshift	NSP12b:A88V	C13730T
EPI_ISL_447583	13730	C	T	13694	29867	NSP12b	A88V	SNP	RNA-dependent RNA polymerase, post-ribosomal frameshift	NSP12b:A88V	C13730T
EPI_ISL_427751	13730	C	T	13466	29412	NSP12b	A88V	SNP	RNA-dependent RNA polymerase, post-ribosomal frameshift	NSP12b:A88V	C13730T
EPI_ISL_457838	13730	C	T	13676	29782	NSP12b	A88V	SNP	RNA-dependent RNA polymerase, post-ribosomal frameshift	NSP12b:A88V	C13730T
EPI_ISL_462351	13730	C	T	13730	29891	NSP12b	A88V	SNP	RNA-dependent RNA polymerase, post-ribosomal frameshift	NSP12b:A88V	C13730T
EPI_ISL_435689	13730	C	T	13726	29789	NSP12b	A88V	SNP	RNA-dependent RNA polymerase, post-ribosomal frameshift	NSP12b:A88V	C13730T
EPI_ISL_447412	13730	C	T	13731	29892	NSP12b	A88V	SNP	RNA-dependent RNA polymerase, post-ribosomal frameshift	NSP12b:A88V	C13730T
EPI_ISL_447665	13730	C	T	13730	29903	NSP12b	A88V	SNP	RNA-dependent RNA polymerase, post-ribosomal frameshift	NSP12b:A88V	C13730T
EPI_ISL_437453	13730	C	T	13730	29903	NSP12b	A88V	SNP	RNA-dependent RNA polymerase, post-ribosomal frameshift	NSP12b:A88V	C13730T
EPI_ISL_447567	13730	C	T	13692	29865	NSP12b	A88V	SNP	RNA-dependent RNA polymerase, post-ribosomal frameshift	NSP12b:A88V	C13730T
EPI_ISL_447575	13730	C	T	13719	29892	NSP12b	A88V	SNP	RNA-dependent RNA polymerase, post-ribosomal frameshift	NSP12b:A88V	C13730T
EPI_ISL_447851	13730	C	T	13692	29822	NSP12b	A88V	SNP	RNA-dependent RNA polymerase, post-ribosomal frameshift	NSP12b:A88V	C13730T
EPI_ISL_447854	13730	C	T	13695	29825	NSP12b	A88V	SNP	RNA-dependent RNA polymerase, post-ribosomal frameshift	NSP12b:A88V	C13730T
EPI_ISL_447863	13730	C	T	13692	29822	NSP12b	A88V	SNP	RNA-dependent RNA polymerase, post-ribosomal frameshift	NSP12b:A88V	C13730T
EPI_ISL_422433	13730	C	T	13718	29879	NSP12b	A88V	SNP	RNA-dependent RNA polymerase, post-ribosomal frameshift	NSP12b:A88V	C13730T
EPI_ISL_417918	13730	C	T	13730	29903	NSP12b	A88V	SNP	RNA-dependent RNA polymerase, post-ribosomal frameshift	NSP12b:A88V	C13730T
EPI_ISL_419771	13730	C	T	13692	29865	NSP12b	A88V	SNP	RNA-dependent RNA polymerase, post-ribosomal frameshift	NSP12b:A88V	C13730T
EPI_ISL_422434	13730	C	T	13726	29887	NSP12b	A88V	SNP	RNA-dependent RNA polymerase, post-ribosomal frameshift	NSP12b:A88V	C13730T
EPI_ISL_422435	13730	C	T	13724	29885	NSP12b	A88V	SNP	RNA-dependent RNA polymerase, post-ribosomal frameshift	NSP12b:A88V	C13730T
EPI_ISL_426882	13730	C	T	13730	29903	NSP12b	A88V	SNP	RNA-dependent RNA polymerase, post-ribosomal frameshift	NSP12b:A88V	C13730T
EPI_ISL_426905	13730	C	T	13700	29873	NSP12b	A88V	SNP	RNA-dependent RNA polymerase, post-ribosomal frameshift	NSP12b:A88V	C13730T
EPI_ISL_427091	13730	C	T	13730	29903	NSP12b	A88V	SNP	RNA-dependent RNA polymerase, post-ribosomal frameshift	NSP12b:A88V	C13730T
EPI_ISL_427750	13730	C	T	13466	29412	NSP12b	A88V	SNP	RNA-dependent RNA polymerase, post-ribosomal frameshift	NSP12b:A88V	C13730T
EPI_ISL_428832	13730	C	T	13724	29885	NSP12b	A88V	SNP	RNA-dependent RNA polymerase, post-ribosomal frameshift	NSP12b:A88V	C13730T
EPI_ISL_428833	13730	C	T	13681	29842	NSP12b	A88V	SNP	RNA-dependent RNA polymerase, post-ribosomal frameshift	NSP12b:A88V	C13730T
EPI_ISL_428834	13730	C	T	13720	29881	NSP12b	A88V	SNP	RNA-dependent RNA polymerase, post-ribosomal frameshift	NSP12b:A88V	C13730T
EPI_ISL_428835	13730	C	T	13724	29885	NSP12b	A88V	SNP	RNA-dependent RNA polymerase, post-ribosomal frameshift	NSP12b:A88V	C13730T
EPI_ISL_428836	13730	C	T	13714	29875	NSP12b	A88V	SNP	RNA-dependent RNA polymerase, post-ribosomal frameshift	NSP12b:A88V	C13730T
EPI_ISL_428837	13730	C	T	13724	29885	NSP12b	A88V	SNP	RNA-dependent RNA polymerase, post-ribosomal frameshift	NSP12b:A88V	C13730T
EPI_ISL_428838	13730	C	T	13724	29885	NSP12b	A88V	SNP	RNA-dependent RNA polymerase, post-ribosomal frameshift	NSP12b:A88V	C13730T
EPI_ISL_428839	13730	C	T	13724	29885	NSP12b	A88V	SNP	RNA-dependent RNA polymerase, post-ribosomal frameshift	NSP12b:A88V	C13730T
EPI_ISL_428840	13730	C	T	13724	29885	NSP12b	A88V	SNP	RNA-dependent RNA polymerase, post-ribosomal frameshift	NSP12b:A88V	C13730T
EPI_ISL_428841	13730	C	T	13728	29889	NSP12b	A88V	SNP	RNA-dependent RNA polymerase, post-ribosomal frameshift	NSP12b:A88V	C13730T
EPI_ISL_428844	13730	C	T	13726	29887	NSP12b	A88V	SNP	RNA-dependent RNA polymerase, post-ribosomal frameshift	NSP12b:A88V	C13730T
EPI_ISL_428845	13730	C	T	13729	29890	NSP12b	A88V	SNP	RNA-dependent RNA polymerase, post-ribosomal frameshift	NSP12b:A88V	C13730T
EPI_ISL_428846	13730	C	T	13714	29875	NSP12b	A88V	SNP	RNA-dependent RNA polymerase, post-ribosomal frameshift	NSP12b:A88V	C13730T
EPI_ISL_428847	13730	C	T	13727	29888	NSP12b	A88V	SNP	RNA-dependent RNA polymerase, post-ribosomal frameshift	NSP12b:A88V	C13730T
EPI_ISL_428848	13730	C	T	13615	29776	NSP12b	A88V	SNP	RNA-dependent RNA polymerase, post-ribosomal frameshift	NSP12b:A88V	C13730T
EPI_ISL_428849	13730	C	T	13718	29879	NSP12b	A88V	SNP	RNA-dependent RNA polymerase, post-ribosomal frameshift	NSP12b:A88V	C13730T
EPI_ISL_428850	13730	C	T	13719	29880	NSP12b	A88V	SNP	RNA-dependent RNA polymerase, post-ribosomal frameshift	NSP12b:A88V	C13730T
EPI_ISL_430476	13730	C	T	13730	29903	NSP12b	A88V	SNP	RNA-dependent RNA polymerase, post-ribosomal frameshift	NSP12b:A88V	C13730T
EPI_ISL_430654	13730	C	T	13730	29903	NSP12b	A88V	SNP	RNA-dependent RNA polymerase, post-ribosomal frameshift	NSP12b:A88V	C13730T
EPI_ISL_435678	13730	C	T	13660	29757	NSP12b	A88V	SNP	RNA-dependent RNA polymerase, post-ribosomal frameshift	NSP12b:A88V	C13730T
EPI_ISL_435679	13730	C	T	13713	29687	NSP12b	A88V	SNP	RNA-dependent RNA polymerase, post-ribosomal frameshift	NSP12b:A88V	C13730T
EPI_ISL_435680	13730	C	T	13645	29683	NSP12b	A88V	SNP	RNA-dependent RNA polymerase, post-ribosomal frameshift	NSP12b:A88V	C13730T
EPI_ISL_435681	13730	C	T	13718	29687	NSP12b	A88V	SNP	RNA-dependent RNA polymerase, post-ribosomal frameshift	NSP12b:A88V	C13730T
EPI_ISL_435682	13730	C	T	13633	29568	NSP12b	A88V	SNP	RNA-dependent RNA polymerase, post-ribosomal frameshift	NSP12b:A88V	C13730T
EPI_ISL_435684	13730	C	T	13701	29833	NSP12b	A88V	SNP	RNA-dependent RNA polymerase, post-ribosomal frameshift	NSP12b:A88V	C13730T
EPI_ISL_435685	13730	C	T	13713	29845	NSP12b	A88V	SNP	RNA-dependent RNA polymerase, post-ribosomal frameshift	NSP12b:A88V	C13730T
EPI_ISL_435687	13730	C	T	13691	29808	NSP12b	A88V	SNP	RNA-dependent RNA polymerase, post-ribosomal frameshift	NSP12b:A88V	C13730T
EPI_ISL_435688	13730	C	T	13681	29797	NSP12b	A88V	SNP	RNA-dependent RNA polymerase, post-ribosomal frameshift	NSP12b:A88V	C13730T
EPI_ISL_435690	13730	C	T	13691	29714	NSP12b	A88V	SNP	RNA-dependent RNA polymerase, post-ribosomal frameshift	NSP12b:A88V	C13730T
EPI_ISL_435691	13730	C	T	13631	29633	NSP12b	A88V	SNP	RNA-dependent RNA polymerase, post-ribosomal frameshift	NSP12b:A88V	C13730T
EPI_ISL_435692	13730	C	T	13713	29839	NSP12b	A88V	SNP	RNA-dependent RNA polymerase, post-ribosomal frameshift	NSP12b:A88V	C13730T
EPI_ISL_435693	13730	C	T	13713	29712	NSP12b	A88V	SNP	RNA-dependent RNA polymerase, post-ribosomal frameshift	NSP12b:A88V	C13730T
EPI_ISL_435694	13730	C	T	13692	29748	NSP12b	A88V	SNP	RNA-dependent RNA polymerase, post-ribosomal frameshift	NSP12b:A88V	C13730T
EPI_ISL_435696	13730	C	T	13692	29648	NSP12b	A88V	SNP	RNA-dependent RNA polymerase, post-ribosomal frameshift	NSP12b:A88V	C13730T
EPI_ISL_436416	13730	C	T	13730	29897	NSP12b	A88V	SNP	RNA-dependent RNA polymerase, post-ribosomal frameshift	NSP12b:A88V	C13730T
EPI_ISL_436422	13730	C	T	13730	29866	NSP12b	A88V	SNP	RNA-dependent RNA polymerase, post-ribosomal frameshift	NSP12b:A88V	C13730T
EPI_ISL_436424	13730	C	T	13730	29866	NSP12b	A88V	SNP	RNA-dependent RNA polymerase, post-ribosomal frameshift	NSP12b:A88V	C13730T
EPI_ISL_436426	13730	C	T	13730	29866	NSP12b	A88V	SNP	RNA-dependent RNA polymerase, post-ribosomal frameshift	NSP12b:A88V	C13730T
EPI_ISL_436448	13730	C	T	13730	29874	NSP12b	A88V	SNP	RNA-dependent RNA polymerase, post-ribosomal frameshift	NSP12b:A88V	C13730T
EPI_ISL_436449	13730	C	T	13730	29868	NSP12b	A88V	SNP	RNA-dependent RNA polymerase, post-ribosomal frameshift	NSP12b:A88V	C13730T
EPI_ISL_438139	13730	C	T	13731	29904	NSP12b	A88V	SNP	RNA-dependent RNA polymerase, post-ribosomal frameshift	NSP12b:A88V	C13730T
EPI_ISL_443192	13730	C	T	13730	29891	NSP12b	A88V	SNP	RNA-dependent RNA polymerase, post-ribosomal frameshift	NSP12b:A88V	C13730T
EPI_ISL_443213	13730	C	T	13730	29891	NSP12b	A88V	SNP	RNA-dependent RNA polymerase, post-ribosomal frameshift	NSP12b:A88V	C13730T
EPI_ISL_443216	13730	C	T	13730	29891	NSP12b	A88V	SNP	RNA-dependent RNA polymerase, post-ribosomal frameshift	NSP12b:A88V	C13730T
EPI_ISL_443227	13730	C	T	13730	29891	NSP12b	A88V	SNP	RNA-dependent RNA polymerase, post-ribosomal frameshift	NSP12b:A88V	C13730T
EPI_ISL_443241	13730	C	T	13730	29891	NSP12b	A88V	SNP	RNA-dependent RNA polymerase, post-ribosomal frameshift	NSP12b:A88V	C13730T
EPI_ISL_443244	13730	C	T	13730	29891	NSP12b	A88V	SNP	RNA-dependent RNA polymerase, post-ribosomal frameshift	NSP12b:A88V	C13730T
EPI_ISL_443245	13730	C	T	13730	29891	NSP12b	A88V	SNP	RNA-dependent RNA polymerase, post-ribosomal frameshift	NSP12b:A88V	C13730T
EPI_ISL_443246	13730	C	T	13730	29891	NSP12b	A88V	SNP	RNA-dependent RNA polymerase, post-ribosomal frameshift	NSP12b:A88V	C13730T
EPI_ISL_443247	13730	C	T	13730	29891	NSP12b	A88V	SNP	RNA-dependent RNA polymerase, post-ribosomal frameshift	NSP12b:A88V	C13730T
EPI_ISL_443248	13730	C	T	13730	29891	NSP12b	A88V	SNP	RNA-dependent RNA polymerase, post-ribosomal frameshift	NSP12b:A88V	C13730T
EPI_ISL_447577	13730	C	T	13692	29865	NSP12b	A88V	SNP	RNA-dependent RNA polymerase, post-ribosomal frameshift	NSP12b:A88V	C13730T
EPI_ISL_447857	13730	C	T	13692	29822	NSP12b	A88V	SNP	RNA-dependent RNA polymerase, post-ribosomal frameshift	NSP12b:A88V	C13730T
EPI_ISL_452209	13730	C	T	13705	29805	NSP12b	A88V	SNP	RNA-dependent RNA polymerase, post-ribosomal frameshift	NSP12b:A88V	C13730T
EPI_ISL_452795	13730	C	T	13728	29864	NSP12b	A88V	SNP	RNA-dependent RNA polymerase, post-ribosomal frameshift	NSP12b:A88V	C13730T
EPI_ISL_454547	13730	C	T	13730	29903	NSP12b	A88V	SNP	RNA-dependent RNA polymerase, post-ribosomal frameshift	NSP12b:A88V	C13730T
EPI_ISL_455641	13730	C	T	13730	29903	NSP12b	A88V	SNP	RNA-dependent RNA polymerase, post-ribosomal frameshift	NSP12b:A88V	C13730T
EPI_ISL_462276	13730	C	T	13730	29887	NSP12b	A88V	SNP	RNA-dependent RNA polymerase, post-ribosomal frameshift	NSP12b:A88V	C13730T
EPI_ISL_462281	13730	C	T	13730	29891	NSP12b	A88V	SNP	RNA-dependent RNA polymerase, post-ribosomal frameshift	NSP12b:A88V	C13730T
EPI_ISL_462286	13730	C	T	13730	29883	NSP12b	A88V	SNP	RNA-dependent RNA polymerase, post-ribosomal frameshift	NSP12b:A88V	C13730T
EPI_ISL_462288	13730	C	T	13730	29891	NSP12b	A88V	SNP	RNA-dependent RNA polymerase, post-ribosomal frameshift	NSP12b:A88V	C13730T
EPI_ISL_462289	13730	C	T	13730	29891	NSP12b	A88V	SNP	RNA-dependent RNA polymerase, post-ribosomal frameshift	NSP12b:A88V	C13730T
EPI_ISL_462302	13730	C	T	13730	29891	NSP12b	A88V	SNP	RNA-dependent RNA polymerase, post-ribosomal frameshift	NSP12b:A88V	C13730T
EPI_ISL_462303	13730	C	T	13730	29891	NSP12b	A88V	SNP	RNA-dependent RNA polymerase, post-ribosomal frameshift	NSP12b:A88V	C13730T
EPI_ISL_462307	13730	C	T	13730	29891	NSP12b	A88V	SNP	RNA-dependent RNA polymerase, post-ribosomal frameshift	NSP12b:A88V	C13730T
[truncated: 48,524 more rows]
