# Supplementary material for: Rational Primer and Probe Construction in PCR-Based Assays for the Efficient Diagnosis of Drifting Variants of SARS-CoV-2
Source: Adv Virol. 2022 May 13;2022:2965666. doi: 10.1155/2022/2965666 (PMC9122727; doi:10.1155/2022/2965666)
Supplement: Supplementary Materials — Supplementary 1: Multiple sequence alignment (MUSCLE) data/diagram of the entire N gene among analyzed 8 coronavirus sequences (NCBI GenBank IDs) by MEGA11 version 0.1 and is presented. Supplementary 2:: Original raw file downloaded from [15]. It contains all the records of mutations in SARS-CoV-2 genomes studied. Supplementary 3, 4, 5, 6, and 7: spreadsheet files for mutation analyses for NSP12ab, S, E, M, and N genes of SARS-CoV-2 genome, respectively, and are available on request. [file 2965666.f1.zip › 2965666.f1/Supplementery 4 (1).txt]

sample	refpos	refvar	qvar	qpos	qlength	protein	variant	varclass	annotation	varname	varclade
EPI_ISL_443763	21566	T	C	21512	29784	S	F2L	SNP	Spike	S:F2L	T21566C
EPI_ISL_447038	21568	T	A	21568	29903	S	F2L	SNP	Spike	S:F2L	T21568A
EPI_ISL_449829	21568	T	A	21544	29879	S	F2L	SNP	Spike	S:F2L	T21568A
EPI_ISL_446797	21568	T	A	21530	29865	S	F2L	SNP	Spike	S:F2L	T21568A
EPI_ISL_446939	21568	T	A	21559	29894	S	F2L	SNP	Spike	S:F2L	T21568A
EPI_ISL_472554	21568	T	A	21567	29902	S	F2L	SNP	Spike	S:F2L	T21568A
EPI_ISL_472589	21568	T	A	21564	29899	S	F2L	SNP	Spike	S:F2L	T21568A
EPI_ISL_474470	21568	T	A	21538	29873	S	F2L	SNP	Spike	S:F2L	T21568A
EPI_ISL_446304	21568	T	A	21530	29865	S	F2L	SNP	Spike	S:F2L	T21568A
EPI_ISL_441655	21569	G	A	21515	29782	S	V3I	SNP	Spike	S:V3I	G21569A
EPI_ISL_470502	21569	G	A	21515	29782	S	V3I	SNP	Spike	S:V3I	G21569A
EPI_ISL_466707	21570	T	G	21570	29903	S	V3G	SNP	Spike	S:V3G	T21570G
EPI_ISL_466708	21570	T	G	21570	29903	S	V3G	SNP	Spike	S:V3G	T21570G
EPI_ISL_468030	21571	T	G	21571	29903	S	V3V	SNP_silent	Spike	S:V3V	T21571G
EPI_ISL_472080	21573	.	T	21545	29875	S	F4	insertion_frameshift	Spike	S:F4	.21573T
EPI_ISL_463537	21573	T	C	21573	29903	S	F4S	SNP	Spike	S:F4S	T21573C
EPI_ISL_462325	21573	T	C	21573	29891	S	F4S	SNP	Spike	S:F4S	T21573C
EPI_ISL_471458	21574	T	C	21549	29834	S	F4F	SNP_silent	Spike	S:F4F	T21574C
EPI_ISL_426134	21575	C	T	21575	30031	S	L5F	SNP	Spike	S:L5F	C21575T
EPI_ISL_427264	21575	C	T	21565	29864	S	L5F	SNP	Spike	S:L5F	C21575T
EPI_ISL_426074	21575	C	T	21553	29876	S	L5F	SNP	Spike	S:L5F	C21575T
EPI_ISL_427182	21575	C	T	21545	29834	S	L5F	SNP	Spike	S:L5F	C21575T
EPI_ISL_417292	21575	C	T	21575	29903	S	L5F	SNP	Spike	S:L5F	C21575T
EPI_ISL_419928	21575	C	T	21571	29899	S	L5F	SNP	Spike	S:L5F	C21575T
EPI_ISL_447658	21575	C	T	21575	29903	S	L5F	SNP	Spike	S:L5F	C21575T
EPI_ISL_465041	21575	C	T	21575	29903	S	L5F	SNP	Spike	S:L5F	C21575T
EPI_ISL_465049	21575	C	T	21575	29903	S	L5F	SNP	Spike	S:L5F	C21575T
EPI_ISL_435108	21575	C	T	21575	29866	S	L5F	SNP	Spike	S:L5F	C21575T
EPI_ISL_472386	21575	C	T	21575	29903	S	L5F	SNP	Spike	S:L5F	C21575T
EPI_ISL_419255	21575	C	T	21534	29818	S	L5F	SNP	Spike	S:L5F	C21575T
EPI_ISL_465430	21575	C	T	21575	29903	S	L5F	SNP	Spike	S:L5F	C21575T
EPI_ISL_465582	21575	C	T	21575	29903	S	L5F	SNP	Spike	S:L5F	C21575T
EPI_ISL_452980	21575	C	T	21575	29903	S	L5F	SNP	Spike	S:L5F	C21575T
EPI_ISL_461901	21575	C	T	21575	29903	S	L5F	SNP	Spike	S:L5F	C21575T
EPI_ISL_461902	21575	C	T	21575	29903	S	L5F	SNP	Spike	S:L5F	C21575T
EPI_ISL_461905	21575	C	T	21575	29903	S	L5F	SNP	Spike	S:L5F	C21575T
EPI_ISL_461906	21575	C	T	21575	29903	S	L5F	SNP	Spike	S:L5F	C21575T
EPI_ISL_461908	21575	C	T	21575	29903	S	L5F	SNP	Spike	S:L5F	C21575T
EPI_ISL_461912	21575	C	T	21575	29903	S	L5F	SNP	Spike	S:L5F	C21575T
EPI_ISL_461918	21575	C	T	21575	29903	S	L5F	SNP	Spike	S:L5F	C21575T
EPI_ISL_461922	21575	C	T	21575	29903	S	L5F	SNP	Spike	S:L5F	C21575T
EPI_ISL_461923	21575	C	T	21575	29903	S	L5F	SNP	Spike	S:L5F	C21575T
EPI_ISL_461929	21575	C	T	21575	29903	S	L5F	SNP	Spike	S:L5F	C21575T
EPI_ISL_461930	21575	C	T	21575	29903	S	L5F	SNP	Spike	S:L5F	C21575T
EPI_ISL_461932	21575	C	T	21575	29903	S	L5F	SNP	Spike	S:L5F	C21575T
EPI_ISL_461936	21575	C	T	21575	29903	S	L5F	SNP	Spike	S:L5F	C21575T
EPI_ISL_461938	21575	C	T	21575	29903	S	L5F	SNP	Spike	S:L5F	C21575T
EPI_ISL_461939	21575	C	T	21575	29903	S	L5F	SNP	Spike	S:L5F	C21575T
EPI_ISL_461940	21575	C	T	21575	29903	S	L5F	SNP	Spike	S:L5F	C21575T
EPI_ISL_461943	21575	C	T	21575	29903	S	L5F	SNP	Spike	S:L5F	C21575T
EPI_ISL_461944	21575	C	T	21575	29903	S	L5F	SNP	Spike	S:L5F	C21575T
EPI_ISL_461946	21575	C	T	21575	29903	S	L5F	SNP	Spike	S:L5F	C21575T
EPI_ISL_461948	21575	C	T	21575	29903	S	L5F	SNP	Spike	S:L5F	C21575T
EPI_ISL_461950	21575	C	T	21575	29903	S	L5F	SNP	Spike	S:L5F	C21575T
EPI_ISL_461952	21575	C	T	21575	29903	S	L5F	SNP	Spike	S:L5F	C21575T
EPI_ISL_461955	21575	C	T	21575	29903	S	L5F	SNP	Spike	S:L5F	C21575T
EPI_ISL_461960	21575	C	T	21575	29903	S	L5F	SNP	Spike	S:L5F	C21575T
EPI_ISL_461961	21575	C	T	21575	29903	S	L5F	SNP	Spike	S:L5F	C21575T
EPI_ISL_461962	21575	C	T	21575	29903	S	L5F	SNP	Spike	S:L5F	C21575T
EPI_ISL_461964	21575	C	T	21575	29903	S	L5F	SNP	Spike	S:L5F	C21575T
EPI_ISL_461967	21575	C	T	21575	29903	S	L5F	SNP	Spike	S:L5F	C21575T
EPI_ISL_472387	21575	C	T	21575	29903	S	L5F	SNP	Spike	S:L5F	C21575T
EPI_ISL_472388	21575	C	T	21575	29903	S	L5F	SNP	Spike	S:L5F	C21575T
EPI_ISL_472392	21575	C	T	21575	29903	S	L5F	SNP	Spike	S:L5F	C21575T
EPI_ISL_472393	21575	C	T	21575	29903	S	L5F	SNP	Spike	S:L5F	C21575T
EPI_ISL_472396	21575	C	T	21575	29903	S	L5F	SNP	Spike	S:L5F	C21575T
EPI_ISL_472398	21575	C	T	21575	29903	S	L5F	SNP	Spike	S:L5F	C21575T
EPI_ISL_472406	21575	C	T	21575	29903	S	L5F	SNP	Spike	S:L5F	C21575T
EPI_ISL_472413	21575	C	T	21575	29903	S	L5F	SNP	Spike	S:L5F	C21575T
EPI_ISL_472414	21575	C	T	21575	29903	S	L5F	SNP	Spike	S:L5F	C21575T
EPI_ISL_468578	21575	C	T	21565	29893	S	L5F	SNP	Spike	S:L5F	C21575T
EPI_ISL_458103	21575	C	T	21575	29903	S	L5F	SNP	Spike	S:L5F	C21575T
EPI_ISL_415131	21575	C	T	21575	29903	S	L5F	SNP	Spike	S:L5F	C21575T
EPI_ISL_417624	21575	C	T	21575	29903	S	L5F	SNP	Spike	S:L5F	C21575T
EPI_ISL_417737	21575	C	T	21575	29903	S	L5F	SNP	Spike	S:L5F	C21575T
EPI_ISL_417788	21575	C	T	21575	29903	S	L5F	SNP	Spike	S:L5F	C21575T
EPI_ISL_417819	21575	C	T	21575	29903	S	L5F	SNP	Spike	S:L5F	C21575T
EPI_ISL_419169	21575	C	T	21577	29879	S	L5F	SNP	Spike	S:L5F	C21575T
EPI_ISL_421183	21575	C	T	21575	29903	S	L5F	SNP	Spike	S:L5F	C21575T
EPI_ISL_421188	21575	C	T	21575	29903	S	L5F	SNP	Spike	S:L5F	C21575T
EPI_ISL_421189	21575	C	T	21575	29903	S	L5F	SNP	Spike	S:L5F	C21575T
EPI_ISL_421483	21575	C	T	21475	29703	S	L5F	SNP	Spike	S:L5F	C21575T
EPI_ISL_421951	21575	C	T	21575	29903	S	L5F	SNP	Spike	S:L5F	C21575T
EPI_ISL_422414	21575	C	T	21575	29870	S	L5F	SNP	Spike	S:L5F	C21575T
EPI_ISL_422599	21575	C	T	21521	29775	S	L5F	SNP	Spike	S:L5F	C21575T
EPI_ISL_423947	21575	C	T	21575	29903	S	L5F	SNP	Spike	S:L5F	C21575T
EPI_ISL_424422	21575	C	T	21575	29903	S	L5F	SNP	Spike	S:L5F	C21575T
EPI_ISL_424459	21575	C	T	21575	29903	S	L5F	SNP	Spike	S:L5F	C21575T
EPI_ISL_424933	21575	C	T	21575	29903	S	L5F	SNP	Spike	S:L5F	C21575T
EPI_ISL_426519	21575	C	T	21575	29882	S	L5F	SNP	Spike	S:L5F	C21575T
EPI_ISL_426822	21575	C	T	21575	29903	S	L5F	SNP	Spike	S:L5F	C21575T
EPI_ISL_429178	21575	C	T	21571	29899	S	L5F	SNP	Spike	S:L5F	C21575T
EPI_ISL_429478	21575	C	T	21575	29903	S	L5F	SNP	Spike	S:L5F	C21575T
EPI_ISL_430371	21575	C	T	21575	29903	S	L5F	SNP	Spike	S:L5F	C21575T
EPI_ISL_430400	21575	C	T	21575	29903	S	L5F	SNP	Spike	S:L5F	C21575T
EPI_ISL_432006	21575	C	T	21566	29894	S	L5F	SNP	Spike	S:L5F	C21575T
EPI_ISL_432057	21575	C	T	21576	29904	S	L5F	SNP	Spike	S:L5F	C21575T
EPI_ISL_432075	21575	C	T	21544	29872	S	L5F	SNP	Spike	S:L5F	C21575T
EPI_ISL_432216	21575	C	T	21574	29902	S	L5F	SNP	Spike	S:L5F	C21575T
EPI_ISL_432230	21575	C	T	21566	29894	S	L5F	SNP	Spike	S:L5F	C21575T
EPI_ISL_432237	21575	C	T	21571	29899	S	L5F	SNP	Spike	S:L5F	C21575T
EPI_ISL_432399	21575	C	T	21575	29903	S	L5F	SNP	Spike	S:L5F	C21575T
EPI_ISL_432866	21575	C	T	21575	29903	S	L5F	SNP	Spike	S:L5F	C21575T
EPI_ISL_434150	21575	C	T	21575	29903	S	L5F	SNP	Spike	S:L5F	C21575T
EPI_ISL_434383	21575	C	T	21575	29903	S	L5F	SNP	Spike	S:L5F	C21575T
EPI_ISL_434606	21575	C	T	21540	29868	S	L5F	SNP	Spike	S:L5F	C21575T
EPI_ISL_434901	21575	C	T	21575	29903	S	L5F	SNP	Spike	S:L5F	C21575T
EPI_ISL_434928	21575	C	T	21575	29903	S	L5F	SNP	Spike	S:L5F	C21575T
EPI_ISL_435477	21575	C	T	21575	29903	S	L5F	SNP	Spike	S:L5F	C21575T
EPI_ISL_435562	21575	C	T	21575	29840	S	L5F	SNP	Spike	S:L5F	C21575T
EPI_ISL_436626	21575	C	T	21521	29782	S	L5F	SNP	Spike	S:L5F	C21575T
EPI_ISL_437405	21575	C	T	21537	29821	S	L5F	SNP	Spike	S:L5F	C21575T
EPI_ISL_437763	21575	C	T	21537	29865	S	L5F	SNP	Spike	S:L5F	C21575T
EPI_ISL_437764	21575	C	T	21569	29860	S	L5F	SNP	Spike	S:L5F	C21575T
EPI_ISL_437770	21575	C	T	21568	29896	S	L5F	SNP	Spike	S:L5F	C21575T
EPI_ISL_437820	21575	C	T	21566	29867	S	L5F	SNP	Spike	S:L5F	C21575T
EPI_ISL_438179	21575	C	T	21575	29903	S	L5F	SNP	Spike	S:L5F	C21575T
EPI_ISL_438180	21575	C	T	21575	29903	S	L5F	SNP	Spike	S:L5F	C21575T
EPI_ISL_438181	21575	C	T	21575	29903	S	L5F	SNP	Spike	S:L5F	C21575T
EPI_ISL_438182	21575	C	T	21575	29903	S	L5F	SNP	Spike	S:L5F	C21575T
EPI_ISL_438183	21575	C	T	21575	29903	S	L5F	SNP	Spike	S:L5F	C21575T
EPI_ISL_438989	21575	C	T	21521	29782	S	L5F	SNP	Spike	S:L5F	C21575T
EPI_ISL_440919	21575	C	T	21575	29903	S	L5F	SNP	Spike	S:L5F	C21575T
EPI_ISL_441053	21575	C	T	21521	29782	S	L5F	SNP	Spike	S:L5F	C21575T
EPI_ISL_441353	21575	C	T	21575	29903	S	L5F	SNP	Spike	S:L5F	C21575T
EPI_ISL_441783	21575	C	T	21521	29782	S	L5F	SNP	Spike	S:L5F	C21575T
EPI_ISL_441909	21575	C	T	21575	29898	S	L5F	SNP	Spike	S:L5F	C21575T
EPI_ISL_442056	21575	C	T	21521	29803	S	L5F	SNP	Spike	S:L5F	C21575T
EPI_ISL_442548	21575	C	T	21521	29783	S	L5F	SNP	Spike	S:L5F	C21575T
EPI_ISL_442888	21575	C	T	21571	29895	S	L5F	SNP	Spike	S:L5F	C21575T
EPI_ISL_443300	21575	C	T	21575	29863	S	L5F	SNP	Spike	S:L5F	C21575T
EPI_ISL_443403	21575	C	T	21521	29782	S	L5F	SNP	Spike	S:L5F	C21575T
EPI_ISL_443497	21575	C	T	21521	29849	S	L5F	SNP	Spike	S:L5F	C21575T
EPI_ISL_443528	21575	C	T	21521	29849	S	L5F	SNP	Spike	S:L5F	C21575T
EPI_ISL_443545	21575	C	T	21565	29852	S	L5F	SNP	Spike	S:L5F	C21575T
EPI_ISL_443552	21575	C	T	21521	29782	S	L5F	SNP	Spike	S:L5F	C21575T
EPI_ISL_443599	21575	C	T	21521	29782	S	L5F	SNP	Spike	S:L5F	C21575T
EPI_ISL_443648	21575	C	T	21521	29813	S	L5F	SNP	Spike	S:L5F	C21575T
EPI_ISL_444249	21575	C	T	21575	29903	S	L5F	SNP	Spike	S:L5F	C21575T
EPI_ISL_444269	21575	C	T	21575	29903	S	L5F	SNP	Spike	S:L5F	C21575T
EPI_ISL_444386	21575	C	T	21575	29903	S	L5F	SNP	Spike	S:L5F	C21575T
EPI_ISL_444441	21575	C	T	21575	29903	S	L5F	SNP	Spike	S:L5F	C21575T
EPI_ISL_444667	21575	C	T	21575	29903	S	L5F	SNP	Spike	S:L5F	C21575T
EPI_ISL_444728	21575	C	T	21575	29903	S	L5F	SNP	Spike	S:L5F	C21575T
EPI_ISL_444860	21575	C	T	21575	29903	S	L5F	SNP	Spike	S:L5F	C21575T
EPI_ISL_445615	21575	C	T	21572	29900	S	L5F	SNP	Spike	S:L5F	C21575T
EPI_ISL_445636	21575	C	T	21573	29901	S	L5F	SNP	Spike	S:L5F	C21575T
EPI_ISL_445716	21575	C	T	21545	29873	S	L5F	SNP	Spike	S:L5F	C21575T
EPI_ISL_447134	21575	C	T	21575	29903	S	L5F	SNP	Spike	S:L5F	C21575T
EPI_ISL_447681	21575	C	T	21575	29903	S	L5F	SNP	Spike	S:L5F	C21575T
EPI_ISL_447707	21575	C	T	21575	29903	S	L5F	SNP	Spike	S:L5F	C21575T
EPI_ISL_448064	21575	C	T	21575	29903	S	L5F	SNP	Spike	S:L5F	C21575T
EPI_ISL_448109	21575	C	T	21575	29903	S	L5F	SNP	Spike	S:L5F	C21575T
EPI_ISL_448293	21575	C	T	21545	29873	S	L5F	SNP	Spike	S:L5F	C21575T
EPI_ISL_448568	21575	C	T	21575	29903	S	L5F	SNP	Spike	S:L5F	C21575T
EPI_ISL_448661	21575	C	T	21575	29903	S	L5F	SNP	Spike	S:L5F	C21575T
EPI_ISL_449105	21575	C	T	21537	29865	S	L5F	SNP	Spike	S:L5F	C21575T
EPI_ISL_449127	21575	C	T	21545	29873	S	L5F	SNP	Spike	S:L5F	C21575T
EPI_ISL_450038	21575	C	T	21513	29716	S	L5F	SNP	Spike	S:L5F	C21575T
EPI_ISL_450481	21575	C	T	21560	29837	S	L5F	SNP	Spike	S:L5F	C21575T
EPI_ISL_450518	21575	C	T	21575	29903	S	L5F	SNP	Spike	S:L5F	C21575T
EPI_ISL_450524	21575	C	T	21575	29903	S	L5F	SNP	Spike	S:L5F	C21575T
EPI_ISL_451150	21575	C	T	21575	29903	S	L5F	SNP	Spike	S:L5F	C21575T
EPI_ISL_452153	21575	C	T	21537	29865	S	L5F	SNP	Spike	S:L5F	C21575T
EPI_ISL_452513	21575	C	T	21575	29903	S	L5F	SNP	Spike	S:L5F	C21575T
EPI_ISL_452833	21575	C	T	21573	29901	S	L5F	SNP	Spike	S:L5F	C21575T
EPI_ISL_452840	21575	C	T	21573	29870	S	L5F	SNP	Spike	S:L5F	C21575T
EPI_ISL_453033	21575	C	T	21575	29903	S	L5F	SNP	Spike	S:L5F	C21575T
EPI_ISL_453034	21575	C	T	21575	29903	S	L5F	SNP	Spike	S:L5F	C21575T
EPI_ISL_453460	21575	C	T	21575	29903	S	L5F	SNP	Spike	S:L5F	C21575T
EPI_ISL_453729	21575	C	T	21575	29903	S	L5F	SNP	Spike	S:L5F	C21575T
EPI_ISL_453905	21575	C	T	21425	29653	S	L5F	SNP	Spike	S:L5F	C21575T
EPI_ISL_454026	21575	C	T	21535	29763	S	L5F	SNP	Spike	S:L5F	C21575T
EPI_ISL_454329	21575	C	T	21535	29763	S	L5F	SNP	Spike	S:L5F	C21575T
EPI_ISL_455973	21575	C	T	21575	29903	S	L5F	SNP	Spike	S:L5F	C21575T
EPI_ISL_456441	21575	C	T	21575	29903	S	L5F	SNP	Spike	S:L5F	C21575T
EPI_ISL_457272	21575	C	T	21575	29903	S	L5F	SNP	Spike	S:L5F	C21575T
EPI_ISL_457318	21575	C	T	21575	29903	S	L5F	SNP	Spike	S:L5F	C21575T
EPI_ISL_457323	21575	C	T	21575	29903	S	L5F	SNP	Spike	S:L5F	C21575T
EPI_ISL_457372	21575	C	T	21565	29893	S	L5F	SNP	Spike	S:L5F	C21575T
EPI_ISL_457569	21575	C	T	21575	29903	S	L5F	SNP	Spike	S:L5F	C21575T
EPI_ISL_457739	21575	C	T	21561	29857	S	L5F	SNP	Spike	S:L5F	C21575T
EPI_ISL_457740	21575	C	T	21565	29863	S	L5F	SNP	Spike	S:L5F	C21575T
EPI_ISL_458325	21575	C	T	21521	29782	S	L5F	SNP	Spike	S:L5F	C21575T
EPI_ISL_458377	21575	C	T	21521	29782	S	L5F	SNP	Spike	S:L5F	C21575T
EPI_ISL_458405	21575	C	T	21521	29782	S	L5F	SNP	Spike	S:L5F	C21575T
EPI_ISL_458535	21575	C	T	21521	29782	S	L5F	SNP	Spike	S:L5F	C21575T
EPI_ISL_458829	21575	C	T	21521	29782	S	L5F	SNP	Spike	S:L5F	C21575T
EPI_ISL_458986	21575	C	T	21521	29782	S	L5F	SNP	Spike	S:L5F	C21575T
EPI_ISL_459020	21575	C	T	21521	29782	S	L5F	SNP	Spike	S:L5F	C21575T
EPI_ISL_459222	21575	C	T	21521	29783	S	L5F	SNP	Spike	S:L5F	C21575T
EPI_ISL_459711	21575	C	T	21521	29782	S	L5F	SNP	Spike	S:L5F	C21575T
EPI_ISL_460208	21575	C	T	21566	29863	S	L5F	SNP	Spike	S:L5F	C21575T
EPI_ISL_460284	21575	C	T	21553	29840	S	L5F	SNP	Spike	S:L5F	C21575T
EPI_ISL_460294	21575	C	T	21547	29823	S	L5F	SNP	Spike	S:L5F	C21575T
EPI_ISL_460337	21575	C	T	21534	29821	S	L5F	SNP	Spike	S:L5F	C21575T
EPI_ISL_460351	21575	C	T	21537	29824	S	L5F	SNP	Spike	S:L5F	C21575T
EPI_ISL_460383	21575	C	T	21569	29892	S	L5F	SNP	Spike	S:L5F	C21575T
EPI_ISL_460392	21575	C	T	21568	29890	S	L5F	SNP	Spike	S:L5F	C21575T
EPI_ISL_460461	21575	C	T	21553	29842	S	L5F	SNP	Spike	S:L5F	C21575T
EPI_ISL_460640	21575	C	T	21521	29775	S	L5F	SNP	Spike	S:L5F	C21575T
EPI_ISL_461294	21575	C	T	21521	29775	S	L5F	SNP	Spike	S:L5F	C21575T
EPI_ISL_461296	21575	C	T	21521	29775	S	L5F	SNP	Spike	S:L5F	C21575T
EPI_ISL_461661	21575	C	T	21521	29782	S	L5F	SNP	Spike	S:L5F	C21575T
EPI_ISL_462067	21575	C	T	21575	29903	S	L5F	SNP	Spike	S:L5F	C21575T
EPI_ISL_462681	21575	C	T	21575	29881	S	L5F	SNP	Spike	S:L5F	C21575T
EPI_ISL_462733	21575	C	T	21575	29888	S	L5F	SNP	Spike	S:L5F	C21575T
EPI_ISL_463195	21575	C	T	21575	29903	S	L5F	SNP	Spike	S:L5F	C21575T
EPI_ISL_463408	21575	C	T	21575	29903	S	L5F	SNP	Spike	S:L5F	C21575T
EPI_ISL_463472	21575	C	T	21575	29903	S	L5F	SNP	Spike	S:L5F	C21575T
EPI_ISL_463569	21575	C	T	21575	29903	S	L5F	SNP	Spike	S:L5F	C21575T
EPI_ISL_463570	21575	C	T	21575	29903	S	L5F	SNP	Spike	S:L5F	C21575T
EPI_ISL_463571	21575	C	T	21575	29903	S	L5F	SNP	Spike	S:L5F	C21575T
EPI_ISL_463572	21575	C	T	21575	29903	S	L5F	SNP	Spike	S:L5F	C21575T
EPI_ISL_463573	21575	C	T	21575	29903	S	L5F	SNP	Spike	S:L5F	C21575T
EPI_ISL_463581	21575	C	T	21575	29903	S	L5F	SNP	Spike	S:L5F	C21575T
EPI_ISL_463582	21575	C	T	21575	29903	S	L5F	SNP	Spike	S:L5F	C21575T
EPI_ISL_463662	21575	C	T	21575	29903	S	L5F	SNP	Spike	S:L5F	C21575T
EPI_ISL_463911	21575	C	T	21575	29903	S	L5F	SNP	Spike	S:L5F	C21575T
EPI_ISL_465255	21575	C	T	21575	29903	S	L5F	SNP	Spike	S:L5F	C21575T
EPI_ISL_466686	21575	C	T	21575	29903	S	L5F	SNP	Spike	S:L5F	C21575T
EPI_ISL_467223	21575	C	T	21575	29903	S	L5F	SNP	Spike	S:L5F	C21575T
EPI_ISL_467558	21575	C	T	21551	29879	S	L5F	SNP	Spike	S:L5F	C21575T
EPI_ISL_467865	21575	C	T	21521	29782	S	L5F	SNP	Spike	S:L5F	C21575T
EPI_ISL_468026	21575	C	T	21575	29903	S	L5F	SNP	Spike	S:L5F	C21575T
EPI_ISL_468331	21575	C	T	21575	29903	S	L5F	SNP	Spike	S:L5F	C21575T
EPI_ISL_470212	21575	C	T	21521	29779	S	L5F	SNP	Spike	S:L5F	C21575T
EPI_ISL_470327	21575	C	T	21518	29779	S	L5F	SNP	Spike	S:L5F	C21575T
EPI_ISL_471153	21575	C	T	21575	29903	S	L5F	SNP	Spike	S:L5F	C21575T
EPI_ISL_471460	21575	C	T	21551	29835	S	L5F	SNP	Spike	S:L5F	C21575T
EPI_ISL_471581	21575	C	T	21575	29890	S	L5F	SNP	Spike	S:L5F	C21575T
EPI_ISL_472020	21575	C	T	21575	29903	S	L5F	SNP	Spike	S:L5F	C21575T
EPI_ISL_472053	21575	C	T	21559	29887	S	L5F	SNP	Spike	S:L5F	C21575T
EPI_ISL_472065	21575	C	T	21546	29837	S	L5F	SNP	Spike	S:L5F	C21575T
EPI_ISL_472076	21575	C	T	21546	29874	S	L5F	SNP	Spike	S:L5F	C21575T
EPI_ISL_472080	21575	C	T	21547	29875	S	L5F	SNP	Spike	S:L5F	C21575T
EPI_ISL_472087	21575	C	T	21568	29896	S	L5F	SNP	Spike	S:L5F	C21575T
EPI_ISL_472241	21575	C	T	21575	29903	S	L5F	SNP	Spike	S:L5F	C21575T
EPI_ISL_472272	21575	C	T	21575	29903	S	L5F	SNP	Spike	S:L5F	C21575T
EPI_ISL_472279	21575	C	T	21575	29903	S	L5F	SNP	Spike	S:L5F	C21575T
EPI_ISL_472470	21575	C	T	21550	29878	S	L5F	SNP	Spike	S:L5F	C21575T
EPI_ISL_472677	21575	C	T	21537	29865	S	L5F	SNP	Spike	S:L5F	C21575T
EPI_ISL_472876	21575	C	T	21575	29903	S	L5F	SNP	Spike	S:L5F	C21575T
EPI_ISL_472917	21575	C	T	21574	29902	S	L5F	SNP	Spike	S:L5F	C21575T
EPI_ISL_473306	21575	C	T	21575	29903	S	L5F	SNP	Spike	S:L5F	C21575T
EPI_ISL_473524	21575	C	T	21521	29782	S	L5F	SNP	Spike	S:L5F	C21575T
EPI_ISL_473675	21575	C	T	21521	29782	S	L5F	SNP	Spike	S:L5F	C21575T
EPI_ISL_473719	21575	C	T	21521	29782	S	L5F	SNP	Spike	S:L5F	C21575T
EPI_ISL_473773	21575	C	T	21521	29782	S	L5F	SNP	Spike	S:L5F	C21575T
EPI_ISL_473851	21575	C	T	21575	29903	S	L5F	SNP	Spike	S:L5F	C21575T
EPI_ISL_474000	21575	C	T	21539	29867	S	L5F	SNP	Spike	S:L5F	C21575T
EPI_ISL_474489	21575	C	T	21537	29865	S	L5F	SNP	Spike	S:L5F	C21575T
EPI_ISL_435010	21575	C	T	21575	29903	S	L5F	SNP	Spike	S:L5F	C21575T
EPI_ISL_451427	21575	C	T	21575	29903	S	L5F	SNP	Spike	S:L5F	C21575T
EPI_ISL_434838	21575	C	T	21575	29903	S	L5F	SNP	Spike	S:L5F	C21575T
EPI_ISL_441525	21575	C	T	21572	29900	S	L5F	SNP	Spike	S:L5F	C21575T
EPI_ISL_434637	21575	C	T	21565	29893	S	L5F	SNP	Spike	S:L5F	C21575T
EPI_ISL_445024	21575	C	T	21541	29805	S	L5F	SNP	Spike	S:L5F	C21575T
EPI_ISL_467814	21575	C	T	21521	29782	S	L5F	SNP	Spike	S:L5F	C21575T
EPI_ISL_467849	21575	C	T	21521	29782	S	L5F	SNP	Spike	S:L5F	C21575T
EPI_ISL_448143	21575	C	T	21572	29900	S	L5F	SNP	Spike	S:L5F	C21575T
EPI_ISL_453072	21575	C	T	21518	29779	S	L5F	SNP	Spike	S:L5F	C21575T
EPI_ISL_464424	21575	C	T	21572	29900	S	L5F	SNP	Spike	S:L5F	C21575T
EPI_ISL_464425	21575	C	T	21572	29900	S	L5F	SNP	Spike	S:L5F	C21575T
EPI_ISL_447247	21575	C	T	21537	29622	S	L5F	SNP	Spike	S:L5F	C21575T
EPI_ISL_466786	21575	C	T	21575	29903	S	L5F	SNP	Spike	S:L5F	C21575T
EPI_ISL_467328	21575	C	T	21521	29782	S	L5F	SNP	Spike	S:L5F	C21575T
EPI_ISL_450460	21575	C	T	21571	29899	S	L5F	SNP	Spike	S:L5F	C21575T
EPI_ISL_461590	21575	C	T	21572	29900	S	L5F	SNP	Spike	S:L5F	C21575T
EPI_ISL_461674	21575	C	T	21518	29779	S	L5F	SNP	Spike	S:L5F	C21575T
EPI_ISL_444444	21575	C	T	21575	29903	S	L5F	SNP	Spike	S:L5F	C21575T
EPI_ISL_468970	21575	C	T	21575	29903	S	L5F	SNP	Spike	S:L5F	C21575T
EPI_ISL_423474	21575	C	T	21575	29903	S	L5F	SNP	Spike	S:L5F	C21575T
EPI_ISL_432270	21575	C	T	21573	29901	S	L5F	SNP	Spike	S:L5F	C21575T
EPI_ISL_438398	21575	C	T	21521	29813	S	L5F	SNP	Spike	S:L5F	C21575T
EPI_ISL_442060	21575	C	T	21521	29782	S	L5F	SNP	Spike	S:L5F	C21575T
EPI_ISL_445459	21575	C	T	21571	29899	S	L5F	SNP	Spike	S:L5F	C21575T
EPI_ISL_445498	21575	C	T	21569	29897	S	L5F	SNP	Spike	S:L5F	C21575T
EPI_ISL_465307	21575	C	T	21575	29903	S	L5F	SNP	Spike	S:L5F	C21575T
EPI_ISL_472551	21575	C	T	21540	29868	S	L5F	SNP	Spike	S:L5F	C21575T
EPI_ISL_472913	21575	C	T	21575	29903	S	L5F	SNP	Spike	S:L5F	C21575T
EPI_ISL_463522	21575	C	T	21575	29903	S	L5F	SNP	Spike	S:L5F	C21575T
EPI_ISL_420995	21575	C	T	21537	29865	S	L5F	SNP	Spike	S:L5F	C21575T
EPI_ISL_445685	21575	C	T	21563	29891	S	L5F	SNP	Spike	S:L5F	C21575T
EPI_ISL_445711	21575	C	T	21538	29866	S	L5F	SNP	Spike	S:L5F	C21575T
EPI_ISL_445721	21575	C	T	21575	29903	S	L5F	SNP	Spike	S:L5F	C21575T
EPI_ISL_445810	21575	C	T	21575	29903	S	L5F	SNP	Spike	S:L5F	C21575T
EPI_ISL_446318	21575	C	T	21537	29865	S	L5F	SNP	Spike	S:L5F	C21575T
EPI_ISL_446441	21575	C	T	21574	29902	S	L5F	SNP	Spike	S:L5F	C21575T
EPI_ISL_446510	21575	C	T	21545	29873	S	L5F	SNP	Spike	S:L5F	C21575T
EPI_ISL_446762	21575	C	T	21575	29903	S	L5F	SNP	Spike	S:L5F	C21575T
EPI_ISL_446846	21575	C	T	21571	29899	S	L5F	SNP	Spike	S:L5F	C21575T
EPI_ISL_446852	21575	C	T	21575	29903	S	L5F	SNP	Spike	S:L5F	C21575T
EPI_ISL_446911	21575	C	T	21565	29893	S	L5F	SNP	Spike	S:L5F	C21575T
EPI_ISL_474368	21575	C	T	21575	29903	S	L5F	SNP	Spike	S:L5F	C21575T
EPI_ISL_474379	21575	C	T	21568	29896	S	L5F	SNP	Spike	S:L5F	C21575T
EPI_ISL_474398	21575	C	T	21566	29894	S	L5F	SNP	Spike	S:L5F	C21575T
EPI_ISL_474764	21575	C	T	21571	29899	S	L5F	SNP	Spike	S:L5F	C21575T
EPI_ISL_440330	21575	C	T	21521	29849	S	L5F	SNP	Spike	S:L5F	C21575T
EPI_ISL_440611	21575	C	T	21521	29782	S	L5F	SNP	Spike	S:L5F	C21575T
EPI_ISL_441786	21575	C	T	21573	29901	S	L5F	SNP	Spike	S:L5F	C21575T
EPI_ISL_420681	21575	C	T	21572	29900	S	L5F	SNP	Spike	S:L5F	C21575T
EPI_ISL_420682	21575	C	T	21572	29900	S	L5F	SNP	Spike	S:L5F	C21575T
EPI_ISL_420683	21575	C	T	21572	29900	S	L5F	SNP	Spike	S:L5F	C21575T
EPI_ISL_426959	21575	C	T	21572	29900	S	L5F	SNP	Spike	S:L5F	C21575T
EPI_ISL_426974	21575	C	T	21572	29900	S	L5F	SNP	Spike	S:L5F	C21575T
EPI_ISL_426996	21575	C	T	21572	29900	S	L5F	SNP	Spike	S:L5F	C21575T
EPI_ISL_426997	21575	C	T	21572	29900	S	L5F	SNP	Spike	S:L5F	C21575T
EPI_ISL_433630	21575	C	T	21518	29779	S	L5F	SNP	Spike	S:L5F	C21575T
EPI_ISL_438868	21575	C	T	21518	29779	S	L5F	SNP	Spike	S:L5F	C21575T
EPI_ISL_459605	21575	C	T	21518	29779	S	L5F	SNP	Spike	S:L5F	C21575T
EPI_ISL_473548	21575	C	T	21572	29900	S	L5F	SNP	Spike	S:L5F	C21575T
EPI_ISL_418901	21575	C	T	21502	29830	S	L5F	SNP	Spike	S:L5F	C21575T
EPI_ISL_418946	21575	C	T	21427	29755	S	L5F	SNP	Spike	S:L5F	C21575T
EPI_ISL_418719	21575	C	T	21575	29903	S	L5F	SNP	Spike	S:L5F	C21575T
EPI_ISL_418858	21575	C	T	21575	29903	S	L5F	SNP	Spike	S:L5F	C21575T
EPI_ISL_418977	21575	C	T	21575	29903	S	L5F	SNP	Spike	S:L5F	C21575T
EPI_ISL_420298	21575	C	T	21575	29903	S	L5F	SNP	Spike	S:L5F	C21575T
EPI_ISL_421713	21575	C	T	21575	29903	S	L5F	SNP	Spike	S:L5F	C21575T
EPI_ISL_423723	21575	C	T	21575	29903	S	L5F	SNP	Spike	S:L5F	C21575T
EPI_ISL_423927	21575	C	T	21575	29903	S	L5F	SNP	Spike	S:L5F	C21575T
EPI_ISL_424879	21575	C	T	21575	29882	S	L5F	SNP	Spike	S:L5F	C21575T
EPI_ISL_425630	21575	C	T	21575	29903	S	L5F	SNP	Spike	S:L5F	C21575T
EPI_ISL_426027	21575	C	T	21550	29818	S	L5F	SNP	Spike	S:L5F	C21575T
EPI_ISL_426038	21575	C	T	21550	29822	S	L5F	SNP	Spike	S:L5F	C21575T
EPI_ISL_426322	21575	C	T	21550	29822	S	L5F	SNP	Spike	S:L5F	C21575T
EPI_ISL_433808	21575	C	T	21575	29903	S	L5F	SNP	Spike	S:L5F	C21575T
EPI_ISL_434691	21575	C	T	21575	29903	S	L5F	SNP	Spike	S:L5F	C21575T
EPI_ISL_436844	21575	C	T	21575	29903	S	L5F	SNP	Spike	S:L5F	C21575T
EPI_ISL_438230	21575	C	T	21575	29903	S	L5F	SNP	Spike	S:L5F	C21575T
EPI_ISL_457753	21575	C	T	21575	29903	S	L5F	SNP	Spike	S:L5F	C21575T
EPI_ISL_457798	21575	C	T	21575	29903	S	L5F	SNP	Spike	S:L5F	C21575T
EPI_ISL_466592	21575	C	T	21575	29903	S	L5F	SNP	Spike	S:L5F	C21575T
EPI_ISL_463033	21575	C	T	21575	29683	S	L5F	SNP	Spike	S:L5F	C21575T
EPI_ISL_457309	21575	C	T	21575	29903	S	L5F	SNP	Spike	S:L5F	C21575T
EPI_ISL_458630	21575	C	T	21521	29782	S	L5F	SNP	Spike	S:L5F	C21575T
EPI_ISL_434333	21575	C	T	21575	29903	S	L5F	SNP	Spike	S:L5F	C21575T
EPI_ISL_427142	21575	C	T	21575	29902	S	L5F	SNP	Spike	S:L5F	C21575T
EPI_ISL_427684	21575	C	T	21311	29412	S	L5F	SNP	Spike	S:L5F	C21575T
EPI_ISL_451506	21575	C	T	21309	29408	S	L5F	SNP	Spike	S:L5F	C21575T
EPI_ISL_456853	21575	C	T	21521	29782	S	L5F	SNP	Spike	S:L5F	C21575T
EPI_ISL_471446	21575	C	T	21548	29876	S	L5F	SNP	Spike	S:L5F	C21575T
EPI_ISL_465077	21575	C	T	21575	29903	S	L5F	SNP	Spike	S:L5F	C21575T
EPI_ISL_415623	21575	C	T	21480	29807	S	L5F	SNP	Spike	S:L5F	C21575T
EPI_ISL_417353	21575	C	T	21543	29877	S	L5F	SNP	Spike	S:L5F	C21575T
EPI_ISL_417380	21575	C	T	21548	29842	S	L5F	SNP	Spike	S:L5F	C21575T
EPI_ISL_424303	21575	C	T	21197	29424	S	L5F	SNP	Spike	S:L5F	C21575T
EPI_ISL_434114	21575	C	T	21575	29903	S	L5F	SNP	Spike	S:L5F	C21575T
EPI_ISL_434119	21575	C	T	21575	29903	S	L5F	SNP	Spike	S:L5F	C21575T
EPI_ISL_434132	21575	C	T	21575	29903	S	L5F	SNP	Spike	S:L5F	C21575T
EPI_ISL_434134	21575	C	T	21575	29903	S	L5F	SNP	Spike	S:L5F	C21575T
EPI_ISL_434156	21575	C	T	21575	29903	S	L5F	SNP	Spike	S:L5F	C21575T
EPI_ISL_434178	21575	C	T	21575	29903	S	L5F	SNP	Spike	S:L5F	C21575T
EPI_ISL_434210	21575	C	T	21575	29903	S	L5F	SNP	Spike	S:L5F	C21575T
EPI_ISL_452375	21575	C	T	21575	29903	S	L5F	SNP	Spike	S:L5F	C21575T
EPI_ISL_454500	21575	C	T	21575	29903	S	L5F	SNP	Spike	S:L5F	C21575T
EPI_ISL_463402	21575	C	T	21575	29903	S	L5F	SNP	Spike	S:L5F	C21575T
EPI_ISL_468994	21575	C	T	21575	29902	S	L5F	SNP	Spike	S:L5F	C21575T
EPI_ISL_444244	21575	C	T	21575	29903	S	L5F	SNP	Spike	S:L5F	C21575T
EPI_ISL_416604	21575	C	T	21498	29767	S	L5F	SNP	Spike	S:L5F	C21575T
EPI_ISL_418314	21575	C	T	21575	29903	S	L5F	SNP	Spike	S:L5F	C21575T
EPI_ISL_452544	21575	C	T	21575	29903	S	L5F	SNP	Spike	S:L5F	C21575T
EPI_ISL_418992	21575	C	T	21575	29891	S	L5F	SNP	Spike	S:L5F	C21575T
EPI_ISL_471458	21577	TG	GT	21552	29834	S	V6F	SNP	Spike	S:V6F	TG21577GT
EPI_ISL_436340	21578	G	A	21531	29639	S	V6I	SNP	Spike	S:V6I	G21578A
EPI_ISL_447478	21578	G	A	21540	29813	S	V6I	SNP	Spike	S:V6I	G21578A
EPI_ISL_459982	21578	G	T	21562	29848	S	V6F	SNP	Spike	S:V6F	G21578T
EPI_ISL_465859	21578	G	T	21578	29903	S	V6F	SNP	Spike	S:V6F	G21578T
EPI_ISL_466155	21578	G	A	21578	29903	S	V6I	SNP	Spike	S:V6I	G21578A
EPI_ISL_467962	21578	G	T	21578	29903	S	V6F	SNP	Spike	S:V6F	G21578T
EPI_ISL_471146	21578	G	T	21578	29903	S	V6F	SNP	Spike	S:V6F	G21578T
EPI_ISL_471456	21578	G	T	21554	29860	S	V6F	SNP	Spike	S:V6F	G21578T
EPI_ISL_471457	21578	G	T	21558	29839	S	V6F	SNP	Spike	S:V6F	G21578T
EPI_ISL_471460	21578	G	T	21554	29835	S	V6F	SNP	Spike	S:V6F	G21578T
EPI_ISL_454558	21581	T	A	21581	29903	S	L7I	SNP	Spike	S:L7I	T21581A
EPI_ISL_419232	21584	T	G	21584	29903	S	L8V	SNP	Spike	S:L8V	T21584G
EPI_ISL_419243	21584	T	G	21584	29903	S	L8V	SNP	Spike	S:L8V	T21584G
EPI_ISL_419244	21584	T	G	21584	29903	S	L8V	SNP	Spike	S:L8V	T21584G
EPI_ISL_419245	21584	T	G	21584	29903	S	L8V	SNP	Spike	S:L8V	T21584G
EPI_ISL_419247	21584	T	G	21584	29903	S	L8V	SNP	Spike	S:L8V	T21584G
EPI_ISL_419248	21584	T	G	21584	29903	S	L8V	SNP	Spike	S:L8V	T21584G
EPI_ISL_419249	21584	T	G	21584	29903	S	L8V	SNP	Spike	S:L8V	T21584G
EPI_ISL_419250	21584	T	G	21584	29903	S	L8V	SNP	Spike	S:L8V	T21584G
EPI_ISL_419252	21584	T	G	21584	29903	S	L8V	SNP	Spike	S:L8V	T21584G
EPI_ISL_414517	21584	T	G	21545	29764	S	L8V	SNP	Spike	S:L8V	T21584G
EPI_ISL_414519	21584	T	G	21545	29764	S	L8V	SNP	Spike	S:L8V	T21584G
EPI_ISL_415582	21584	T	G	21584	29903	S	L8V	SNP	Spike	S:L8V	T21584G
EPI_ISL_419251	21584	T	G	21584	29903	S	L8V	SNP	Spike	S:L8V	T21584G
EPI_ISL_450405	21584	T	G	21545	29764	S	L8V	SNP	Spike	S:L8V	T21584G
EPI_ISL_419221	21584	T	G	21584	29903	S	L8V	SNP	Spike	S:L8V	T21584G
EPI_ISL_417183	21584	T	G	21584	29903	S	L8V	SNP	Spike	S:L8V	T21584G
EPI_ISL_417184	21584	T	G	21584	29903	S	L8V	SNP	Spike	S:L8V	T21584G
EPI_ISL_417187	21584	T	G	21584	29903	S	L8V	SNP	Spike	S:L8V	T21584G
EPI_ISL_417188	21584	T	G	21584	29903	S	L8V	SNP	Spike	S:L8V	T21584G
EPI_ISL_417190	21584	T	G	21584	29903	S	L8V	SNP	Spike	S:L8V	T21584G
EPI_ISL_417193	21584	T	G	21584	29903	S	L8V	SNP	Spike	S:L8V	T21584G
EPI_ISL_417195	21584	T	G	21584	29903	S	L8V	SNP	Spike	S:L8V	T21584G
EPI_ISL_417197	21584	T	G	21584	29903	S	L8V	SNP	Spike	S:L8V	T21584G
EPI_ISL_417199	21584	T	G	21584	29903	S	L8V	SNP	Spike	S:L8V	T21584G
EPI_ISL_418815	21584	T	G	21584	29903	S	L8V	SNP	Spike	S:L8V	T21584G
EPI_ISL_419213	21584	T	G	21584	29903	S	L8V	SNP	Spike	S:L8V	T21584G
EPI_ISL_419214	21584	T	G	21584	29903	S	L8V	SNP	Spike	S:L8V	T21584G
EPI_ISL_419215	21584	T	G	21584	29903	S	L8V	SNP	Spike	S:L8V	T21584G
EPI_ISL_419216	21584	T	G	21584	29903	S	L8V	SNP	Spike	S:L8V	T21584G
EPI_ISL_419218	21584	T	G	21584	29903	S	L8V	SNP	Spike	S:L8V	T21584G
EPI_ISL_419219	21584	T	G	21584	29903	S	L8V	SNP	Spike	S:L8V	T21584G
EPI_ISL_420048	21585	T	G	21585	29879	S	L8W	SNP	Spike	S:L8W	T21585G
EPI_ISL_422284	21587	C	T	21557	29873	S	P9S	SNP	Spike	S:P9S	C21587T
EPI_ISL_422754	21587	C	T	21533	29775	S	P9S	SNP	Spike	S:P9S	C21587T
EPI_ISL_423361	21587	C	T	21587	29903	S	P9S	SNP	Spike	S:P9S	C21587T
EPI_ISL_448315	21587	C	T	21587	29903	S	P9S	SNP	Spike	S:P9S	C21587T
EPI_ISL_457524	21587	C	T	21557	29873	S	P9S	SNP	Spike	S:P9S	C21587T
EPI_ISL_457556	21587	C	T	21585	29901	S	P9S	SNP	Spike	S:P9S	C21587T
EPI_ISL_462636	21587	C	T	21587	29903	S	P9S	SNP	Spike	S:P9S	C21587T
EPI_ISL_455404	21587	C	T	21553	29869	S	P9S	SNP	Spike	S:P9S	C21587T
EPI_ISL_425208	21588	C	T	21534	29782	S	P9L	SNP	Spike	S:P9L	C21588T
EPI_ISL_436367	21588	C	T	21550	29811	S	P9L	SNP	Spike	S:P9L	C21588T
EPI_ISL_444389	21588	C	T	21579	29894	S	P9L	SNP	Spike	S:P9L	C21588T
EPI_ISL_447980	21588	C	T	21588	29903	S	P9L	SNP	Spike	S:P9L	C21588T
EPI_ISL_460753	21588	C	T	21534	29775	S	P9L	SNP	Spike	S:P9L	C21588T
EPI_ISL_424864	21588	C	T	21588	29882	S	P9L	SNP	Spike	S:P9L	C21588T
EPI_ISL_436446	21588	C	A	21588	29866	S	P9Q	SNP	Spike	S:P9Q	C21588A
EPI_ISL_470192	21588	C	T	21534	29782	S	P9L	SNP	Spike	S:P9L	C21588T
EPI_ISL_465608	21588	C	T	21588	29903	S	P9L	SNP	Spike	S:P9L	C21588T
EPI_ISL_454512	21589	A	G	21586	29900	S	P9P	SNP_silent	Spike	S:P9P	A21589G
EPI_ISL_417006	21590	C	T	21536	29782	S	P9P	SNP_silent	Spike	S:P9P	C21590T
EPI_ISL_418638	21590	C	T	21536	29782	S	P9P	SNP_silent	Spike	S:P9P	C21590T
EPI_ISL_418644	21590	C	T	21536	29782	S	P9P	SNP_silent	Spike	S:P9P	C21590T
EPI_ISL_418652	21590	C	T	21536	29782	S	P9P	SNP_silent	Spike	S:P9P	C21590T
EPI_ISL_418798	21590	C	T	21536	29782	S	P9P	SNP_silent	Spike	S:P9P	C21590T
EPI_ISL_420334	21590	C	T	21536	29782	S	P9P	SNP_silent	Spike	S:P9P	C21590T
EPI_ISL_420442	21590	C	T	21536	29782	S	P9P	SNP_silent	Spike	S:P9P	C21590T
EPI_ISL_421184	21590	C	T	21590	29900	S	P9P	SNP_silent	Spike	S:P9P	C21590T
EPI_ISL_424628	21590	C	T	21590	29903	S	P9P	SNP_silent	Spike	S:P9P	C21590T
EPI_ISL_424639	21590	C	T	21590	29903	S	P9P	SNP_silent	Spike	S:P9P	C21590T
EPI_ISL_427347	21590	C	T	21590	29903	S	P9P	SNP_silent	Spike	S:P9P	C21590T
EPI_ISL_427369	21590	C	T	21590	29900	S	P9P	SNP_silent	Spike	S:P9P	C21590T
EPI_ISL_427390	21590	C	T	21590	29900	S	P9P	SNP_silent	Spike	S:P9P	C21590T
EPI_ISL_435536	21590	C	A	21590	29903	S	L10I	SNP	Spike	S:L10I	C21590A
EPI_ISL_435549	21590	C	A	21590	29903	S	L10I	SNP	Spike	S:L10I	C21590A
EPI_ISL_455971	21590	C	T	21590	29903	S	P9P	SNP_silent	Spike	S:P9P	C21590T
EPI_ISL_458214	21590	C	T	21536	29782	S	P9P	SNP_silent	Spike	S:P9P	C21590T
EPI_ISL_462179	21590	C	T	21536	29782	S	P9P	SNP_silent	Spike	S:P9P	C21590T
EPI_ISL_462189	21590	C	T	21536	29782	S	P9P	SNP_silent	Spike	S:P9P	C21590T
EPI_ISL_462207	21590	C	T	21536	29782	S	P9P	SNP_silent	Spike	S:P9P	C21590T
EPI_ISL_462219	21590	C	T	21536	29782	S	P9P	SNP_silent	Spike	S:P9P	C21590T
EPI_ISL_465288	21590	C	T	21590	29903	S	P9P	SNP_silent	Spike	S:P9P	C21590T
EPI_ISL_464021	21592	A	G	21592	29903	S	L10L	SNP_silent	Spike	S:L10L	A21592G
EPI_ISL_464038	21592	A	G	21592	29903	S	L10L	SNP_silent	Spike	S:L10L	A21592G
EPI_ISL_453765	21593	G	T	21593	29903	S	V11F	SNP	Spike	S:V11F	G21593T
EPI_ISL_417186	21595	C	T	21595	29903	S	V11V	SNP_silent	Spike	S:V11V	C21595T
EPI_ISL_435058	21595	C	T	21595	29903	S	V11V	SNP_silent	Spike	S:V11V	C21595T
EPI_ISL_439254	21595	C	T	21595	29903	S	V11V	SNP_silent	Spike	S:V11V	C21595T
EPI_ISL_447226	21595	C	T	21595	29890	S	V11V	SNP_silent	Spike	S:V11V	C21595T
EPI_ISL_450298	21595	C	T	21595	29903	S	V11V	SNP_silent	Spike	S:V11V	C21595T
EPI_ISL_463043	21595	C	T	21595	29685	S	V11V	SNP_silent	Spike	S:V11V	C21595T
EPI_ISL_422275	21595	C	T	21588	29896	S	V11V	SNP_silent	Spike	S:V11V	C21595T
EPI_ISL_436446	21595	C	A	21595	29866	S	V11V	SNP_silent	Spike	S:V11V	C21595A
EPI_ISL_417411	21595	C	T	21330	29409	S	V11V	SNP_silent	Spike	S:V11V	C21595T
EPI_ISL_429020	21595	C	T	21595	29903	S	V11V	SNP_silent	Spike	S:V11V	C21595T
EPI_ISL_418068	21597	C	T	21383	29689	S	S12F	SNP	Spike	S:S12F	C21597T
EPI_ISL_423553	21597	C	T	21597	29903	S	S12F	SNP	Spike	S:S12F	C21597T
EPI_ISL_442918	21597	C	T	21543	29849	S	S12F	SNP	Spike	S:S12F	C21597T
EPI_ISL_443772	21597	C	T	21543	29782	S	S12F	SNP	Spike	S:S12F	C21597T
EPI_ISL_452809	21597	C	G	21585	29858	S	S12C	SNP	Spike	S:S12C	C21597G
EPI_ISL_469616	21597	C	T	21543	29782	S	S12F	SNP	Spike	S:S12F	C21597T
EPI_ISL_469978	21597	C	T	21543	29782	S	S12F	SNP	Spike	S:S12F	C21597T
EPI_ISL_471539	21597	C	T	21597	29890	S	S12F	SNP	Spike	S:S12F	C21597T
EPI_ISL_472438	21597	C	T	21560	29866	S	S12F	SNP	Spike	S:S12F	C21597T
EPI_ISL_462397	21597	C	T	21597	29891	S	S12F	SNP	Spike	S:S12F	C21597T
EPI_ISL_469084	21597	C	T	21597	29891	S	S12F	SNP	Spike	S:S12F	C21597T
EPI_ISL_469087	21597	C	T	21597	29891	S	S12F	SNP	Spike	S:S12F	C21597T
EPI_ISL_447030	21600	G	T	21600	29903	S	S13I	SNP	Spike	S:S13I	G21600T
EPI_ISL_448757	21600	G	T	21600	29903	S	S13I	SNP	Spike	S:S13I	G21600T
EPI_ISL_458361	21600	G	T	21546	29782	S	S13I	SNP	Spike	S:S13I	G21600T
EPI_ISL_462052	21600	G	T	21600	29903	S	S13I	SNP	Spike	S:S13I	G21600T
EPI_ISL_462056	21600	G	T	21600	29903	S	S13I	SNP	Spike	S:S13I	G21600T
EPI_ISL_466875	21600	G	T	21600	29903	S	S13I	SNP	Spike	S:S13I	G21600T
EPI_ISL_468073	21600	G	T	21599	29901	S	S13I	SNP	Spike	S:S13I	G21600T
EPI_ISL_469639	21600	G	T	21546	29782	S	S13I	SNP	Spike	S:S13I	G21600T
EPI_ISL_449009	21600	G	A	21595	29898	S	S13N	SNP	Spike	S:S13N	G21600A
EPI_ISL_457458	21600	G	A	21586	29889	S	S13N	SNP	Spike	S:S13N	G21600A
EPI_ISL_459440	21600	G	A	21543	29779	S	S13N	SNP	Spike	S:S13N	G21600A
EPI_ISL_459455	21600	G	A	21543	29779	S	S13N	SNP	Spike	S:S13N	G21600A
EPI_ISL_459480	21600	G	A	21543	29779	S	S13N	SNP	Spike	S:S13N	G21600A
EPI_ISL_435396	21601	T	C	21601	29903	S	S13S	SNP_silent	Spike	S:S13S	T21601C
EPI_ISL_459420	21601	TCAGTGTGTTAATCT	.	21546	29767	S	Q14	deletion	Spike	S:Q14	TCAGTGTGTTAATCT21601.
EPI_ISL_474658	21601	T	C	21591	29893	S	S13S	SNP_silent	Spike	S:S13S	T21601C
EPI_ISL_420770	21603	A	G	21603	29904	S	Q14R	SNP	Spike	S:Q14R	A21603G
EPI_ISL_422222	21603	A	G	21566	29866	S	Q14R	SNP	Spike	S:Q14R	A21603G
EPI_ISL_445968	21603	A	G	21570	29870	S	Q14R	SNP	Spike	S:Q14R	A21603G
EPI_ISL_447381	21604	G	T	21605	29892	S	Q14H	SNP	Spike	S:Q14H	G21604T
EPI_ISL_429424	21604	G	T	21604	29903	S	Q14H	SNP	Spike	S:Q14H	G21604T
EPI_ISL_448267	21604	G	T	21568	29867	S	Q14H	SNP	Spike	S:Q14H	G21604T
EPI_ISL_460323	21604	G	T	21571	29831	S	Q14H	SNP	Spike	S:Q14H	G21604T
EPI_ISL_460331	21604	G	T	21576	29834	S	Q14H	SNP	Spike	S:Q14H	G21604T
EPI_ISL_460336	21604	G	T	21555	29813	S	Q14H	SNP	Spike	S:Q14H	G21604T
EPI_ISL_460359	21604	G	T	21570	29830	S	Q14H	SNP	Spike	S:Q14H	G21604T
EPI_ISL_460381	21604	G	T	21515	29719	S	Q14H	SNP	Spike	S:Q14H	G21604T
EPI_ISL_460418	21604	G	T	21598	29866	S	Q14H	SNP	Spike	S:Q14H	G21604T
EPI_ISL_460431	21604	G	T	21576	29836	S	Q14H	SNP	Spike	S:Q14H	G21604T
EPI_ISL_460436	21604	G	T	21549	29748	S	Q14H	SNP	Spike	S:Q14H	G21604T
EPI_ISL_466630	21604	G	T	21604	29903	S	Q14H	SNP	Spike	S:Q14H	G21604T
EPI_ISL_423469	21604	G	C	21604	29903	S	Q14H	SNP	Spike	S:Q14H	G21604C
EPI_ISL_444760	21606	G	T	21606	29903	S	C15F	SNP	Spike	S:C15F	G21606T
EPI_ISL_450649	21606	G	T	21606	29903	S	C15F	SNP	Spike	S:C15F	G21606T
EPI_ISL_461991	21606	G	T	21606	29903	S	C15F	SNP	Spike	S:C15F	G21606T
EPI_ISL_472405	21606	G	T	21605	29899	S	C15F	SNP	Spike	S:C15F	G21606T
EPI_ISL_469566	21606	G	T	21552	29782	S	C15F	SNP	Spike	S:C15F	G21606T
EPI_ISL_469770	21606	G	T	21554	29784	S	C15F	SNP	Spike	S:C15F	G21606T
EPI_ISL_473774	21607	T	C	21553	29782	S	C15C	SNP_silent	Spike	S:C15C	T21607C
EPI_ISL_456083	21608	G	T	21554	29714	S	V16F	SNP	Spike	S:V16F	G21608T
EPI_ISL_468339	21613	T	C	21613	29903	S	N17N	SNP_silent	Spike	S:N17N	T21613C
EPI_ISL_468340	21613	T	C	21613	29903	S	N17N	SNP_silent	Spike	S:N17N	T21613C
EPI_ISL_468420	21613	T	G	21613	29903	S	N17K	SNP	Spike	S:N17K	T21613G
EPI_ISL_460125	21614	C	T	21600	29861	S	L18F	SNP	Spike	S:L18F	C21614T
EPI_ISL_463747	21614	C	T	21614	29875	S	L18F	SNP	Spike	S:L18F	C21614T
EPI_ISL_420159	21614	C	T	21614	29903	S	L18F	SNP	Spike	S:L18F	C21614T
EPI_ISL_432503	21614	C	T	21614	29903	S	L18F	SNP	Spike	S:L18F	C21614T
EPI_ISL_432511	21614	C	T	21614	29903	S	L18F	SNP	Spike	S:L18F	C21614T
EPI_ISL_432570	21614	C	T	21614	29903	S	L18F	SNP	Spike	S:L18F	C21614T
EPI_ISL_432575	21614	C	T	21614	29903	S	L18F	SNP	Spike	S:L18F	C21614T
EPI_ISL_432602	21614	C	T	21614	29903	S	L18F	SNP	Spike	S:L18F	C21614T
EPI_ISL_432615	21614	C	T	21614	29903	S	L18F	SNP	Spike	S:L18F	C21614T
EPI_ISL_432620	21614	C	T	21614	29903	S	L18F	SNP	Spike	S:L18F	C21614T
EPI_ISL_432632	21614	C	T	21614	29903	S	L18F	SNP	Spike	S:L18F	C21614T
EPI_ISL_432644	21614	C	T	21614	29903	S	L18F	SNP	Spike	S:L18F	C21614T
EPI_ISL_432727	21614	C	T	21614	29903	S	L18F	SNP	Spike	S:L18F	C21614T
EPI_ISL_432732	21614	C	T	21614	29903	S	L18F	SNP	Spike	S:L18F	C21614T
EPI_ISL_432765	21614	C	T	21614	29903	S	L18F	SNP	Spike	S:L18F	C21614T
EPI_ISL_432774	21614	C	T	21614	29897	S	L18F	SNP	Spike	S:L18F	C21614T
EPI_ISL_432789	21614	C	T	21614	29903	S	L18F	SNP	Spike	S:L18F	C21614T
EPI_ISL_432790	21614	C	T	21614	29903	S	L18F	SNP	Spike	S:L18F	C21614T
EPI_ISL_432793	21614	C	T	21614	29903	S	L18F	SNP	Spike	S:L18F	C21614T
EPI_ISL_432802	21614	C	T	21614	29903	S	L18F	SNP	Spike	S:L18F	C21614T
EPI_ISL_432812	21614	C	T	21614	29903	S	L18F	SNP	Spike	S:L18F	C21614T
EPI_ISL_432825	21614	C	T	21614	29903	S	L18F	SNP	Spike	S:L18F	C21614T
EPI_ISL_432835	21614	C	T	21614	29903	S	L18F	SNP	Spike	S:L18F	C21614T
EPI_ISL_432852	21614	C	T	21614	29903	S	L18F	SNP	Spike	S:L18F	C21614T
EPI_ISL_434939	21614	C	T	21614	29903	S	L18F	SNP	Spike	S:L18F	C21614T
EPI_ISL_435508	21614	C	T	21614	29903	S	L18F	SNP	Spike	S:L18F	C21614T
EPI_ISL_438883	21614	C	T	21560	29782	S	L18F	SNP	Spike	S:L18F	C21614T
EPI_ISL_438885	21614	C	T	21560	29782	S	L18F	SNP	Spike	S:L18F	C21614T
EPI_ISL_439491	21614	C	T	21560	29812	S	L18F	SNP	Spike	S:L18F	C21614T
EPI_ISL_441903	21614	C	T	21614	29903	S	L18F	SNP	Spike	S:L18F	C21614T
EPI_ISL_441941	21614	C	T	21614	29903	S	L18F	SNP	Spike	S:L18F	C21614T
EPI_ISL_441942	21614	C	T	21614	29903	S	L18F	SNP	Spike	S:L18F	C21614T
EPI_ISL_441952	21614	C	T	21614	29903	S	L18F	SNP	Spike	S:L18F	C21614T
EPI_ISL_441954	21614	C	T	21614	29903	S	L18F	SNP	Spike	S:L18F	C21614T
EPI_ISL_441963	21614	C	T	21614	29903	S	L18F	SNP	Spike	S:L18F	C21614T
EPI_ISL_441970	21614	C	T	21614	29903	S	L18F	SNP	Spike	S:L18F	C21614T
EPI_ISL_442018	21614	C	T	21614	29903	S	L18F	SNP	Spike	S:L18F	C21614T
EPI_ISL_442020	21614	C	T	21614	29903	S	L18F	SNP	Spike	S:L18F	C21614T
EPI_ISL_442358	21614	C	T	21614	29903	S	L18F	SNP	Spike	S:L18F	C21614T
EPI_ISL_442372	21614	C	T	21614	29903	S	L18F	SNP	Spike	S:L18F	C21614T
EPI_ISL_442378	21614	C	T	21614	29903	S	L18F	SNP	Spike	S:L18F	C21614T
EPI_ISL_442390	21614	C	T	21614	29903	S	L18F	SNP	Spike	S:L18F	C21614T
EPI_ISL_442400	21614	C	T	21614	29903	S	L18F	SNP	Spike	S:L18F	C21614T
EPI_ISL_442403	21614	C	T	21614	29903	S	L18F	SNP	Spike	S:L18F	C21614T
EPI_ISL_442467	21614	C	T	21614	29903	S	L18F	SNP	Spike	S:L18F	C21614T
EPI_ISL_442471	21614	C	T	21614	29903	S	L18F	SNP	Spike	S:L18F	C21614T
EPI_ISL_442475	21614	C	T	21614	29903	S	L18F	SNP	Spike	S:L18F	C21614T
EPI_ISL_442502	21614	C	T	21614	29903	S	L18F	SNP	Spike	S:L18F	C21614T
EPI_ISL_444289	21614	C	T	21614	29903	S	L18F	SNP	Spike	S:L18F	C21614T
EPI_ISL_447149	21614	C	T	21614	29903	S	L18F	SNP	Spike	S:L18F	C21614T
EPI_ISL_447979	21614	C	T	21614	29903	S	L18F	SNP	Spike	S:L18F	C21614T
EPI_ISL_448084	21614	C	T	21614	29903	S	L18F	SNP	Spike	S:L18F	C21614T
EPI_ISL_448827	21614	C	T	21614	29903	S	L18F	SNP	Spike	S:L18F	C21614T
EPI_ISL_448841	21614	C	T	21614	29903	S	L18F	SNP	Spike	S:L18F	C21614T
EPI_ISL_448867	21614	C	T	21614	29903	S	L18F	SNP	Spike	S:L18F	C21614T
EPI_ISL_448873	21614	C	T	21614	29903	S	L18F	SNP	Spike	S:L18F	C21614T
EPI_ISL_448874	21614	C	T	21614	29903	S	L18F	SNP	Spike	S:L18F	C21614T
EPI_ISL_448875	21614	C	T	21614	29903	S	L18F	SNP	Spike	S:L18F	C21614T
EPI_ISL_448883	21614	C	T	21614	29903	S	L18F	SNP	Spike	S:L18F	C21614T
EPI_ISL_448884	21614	C	T	21614	29903	S	L18F	SNP	Spike	S:L18F	C21614T
EPI_ISL_448891	21614	C	T	21614	29903	S	L18F	SNP	Spike	S:L18F	C21614T
EPI_ISL_452949	21614	C	T	21614	29903	S	L18F	SNP	Spike	S:L18F	C21614T
EPI_ISL_452973	21614	C	T	21614	29903	S	L18F	SNP	Spike	S:L18F	C21614T
EPI_ISL_453712	21614	C	T	21614	29903	S	L18F	SNP	Spike	S:L18F	C21614T
EPI_ISL_453717	21614	C	T	21614	29903	S	L18F	SNP	Spike	S:L18F	C21614T
EPI_ISL_453740	21614	C	T	21614	29903	S	L18F	SNP	Spike	S:L18F	C21614T
EPI_ISL_453759	21614	C	T	21614	29903	S	L18F	SNP	Spike	S:L18F	C21614T
EPI_ISL_453776	21614	C	T	21614	29903	S	L18F	SNP	Spike	S:L18F	C21614T
EPI_ISL_453777	21614	C	T	21614	29903	S	L18F	SNP	Spike	S:L18F	C21614T
EPI_ISL_456703	21614	C	T	21614	29903	S	L18F	SNP	Spike	S:L18F	C21614T
EPI_ISL_456735	21614	C	T	21614	29903	S	L18F	SNP	Spike	S:L18F	C21614T
EPI_ISL_457608	21614	C	T	21614	29903	S	L18F	SNP	Spike	S:L18F	C21614T
EPI_ISL_457648	21614	C	T	21614	29903	S	L18F	SNP	Spike	S:L18F	C21614T
EPI_ISL_457652	21614	C	T	21614	29903	S	L18F	SNP	Spike	S:L18F	C21614T
EPI_ISL_457654	21614	C	T	21614	29903	S	L18F	SNP	Spike	S:L18F	C21614T
EPI_ISL_457685	21614	C	T	21614	29903	S	L18F	SNP	Spike	S:L18F	C21614T
EPI_ISL_459218	21614	C	T	21560	29782	S	L18F	SNP	Spike	S:L18F	C21614T
EPI_ISL_459240	21614	C	T	21560	29782	S	L18F	SNP	Spike	S:L18F	C21614T
EPI_ISL_459259	21614	C	T	21560	29783	S	L18F	SNP	Spike	S:L18F	C21614T
EPI_ISL_459306	21614	C	T	21560	29782	S	L18F	SNP	Spike	S:L18F	C21614T
EPI_ISL_461563	21614	C	T	21614	29903	S	L18F	SNP	Spike	S:L18F	C21614T
EPI_ISL_461579	21614	C	T	21614	29903	S	L18F	SNP	Spike	S:L18F	C21614T
EPI_ISL_462021	21614	C	T	21614	29903	S	L18F	SNP	Spike	S:L18F	C21614T
EPI_ISL_462044	21614	C	T	21614	29903	S	L18F	SNP	Spike	S:L18F	C21614T
EPI_ISL_462047	21614	C	T	21614	29903	S	L18F	SNP	Spike	S:L18F	C21614T
EPI_ISL_462065	21614	C	T	21614	29903	S	L18F	SNP	Spike	S:L18F	C21614T
EPI_ISL_463032	21614	C	T	21614	29689	S	L18F	SNP	Spike	S:L18F	C21614T
EPI_ISL_468655	21614	C	T	21597	29836	S	L18F	SNP	Spike	S:L18F	C21614T
EPI_ISL_469918	21614	C	T	21560	29783	S	L18F	SNP	Spike	S:L18F	C21614T
EPI_ISL_470098	21614	C	T	21560	29782	S	L18F	SNP	Spike	S:L18F	C21614T
EPI_ISL_470181	21614	C	T	21560	29782	S	L18F	SNP	Spike	S:L18F	C21614T
EPI_ISL_473455	21614	C	T	21614	29903	S	L18F	SNP	Spike	S:L18F	C21614T
EPI_ISL_473675	21614	C	T	21560	29782	S	L18F	SNP	Spike	S:L18F	C21614T
EPI_ISL_473706	21614	C	T	21560	29782	S	L18F	SNP	Spike	S:L18F	C21614T
EPI_ISL_473707	21614	C	T	21560	29782	S	L18F	SNP	Spike	S:L18F	C21614T
EPI_ISL_473708	21614	C	T	21560	29782	S	L18F	SNP	Spike	S:L18F	C21614T
EPI_ISL_473773	21614	C	T	21560	29782	S	L18F	SNP	Spike	S:L18F	C21614T
EPI_ISL_460338	21614	C	T	21602	29858	S	L18F	SNP	Spike	S:L18F	C21614T
EPI_ISL_417765	21614	C	T	21614	29903	S	L18F	SNP	Spike	S:L18F	C21614T
EPI_ISL_424369	21614	C	T	21614	29903	S	L18F	SNP	Spike	S:L18F	C21614T
EPI_ISL_464411	21614	C	T	21614	29903	S	L18F	SNP	Spike	S:L18F	C21614T
EPI_ISL_435110	21614	C	T	21614	29866	S	L18F	SNP	Spike	S:L18F	C21614T
EPI_ISL_418332	21614	C	T	21613	29881	S	L18F	SNP	Spike	S:L18F	C21614T
EPI_ISL_421690	21614	C	T	21560	29782	S	L18F	SNP	Spike	S:L18F	C21614T
EPI_ISL_426794	21614	C	T	21614	29903	S	L18F	SNP	Spike	S:L18F	C21614T
EPI_ISL_445096	21614	C	T	21614	29903	S	L18F	SNP	Spike	S:L18F	C21614T
EPI_ISL_445102	21614	C	T	21614	29903	S	L18F	SNP	Spike	S:L18F	C21614T
EPI_ISL_445103	21614	C	T	21614	29903	S	L18F	SNP	Spike	S:L18F	C21614T
EPI_ISL_456180	21614	C	T	21614	29903	S	L18F	SNP	Spike	S:L18F	C21614T
EPI_ISL_467108	21614	C	T	21614	29903	S	L18F	SNP	Spike	S:L18F	C21614T
EPI_ISL_436830	21616	T	C	21616	29903	S	L18L	SNP_silent	Spike	S:L18L	T21616C
EPI_ISL_434533	21617	A	T	21595	29845	S	T19S	SNP	Spike	S:T19S	A21617T
EPI_ISL_470255	21617	A	C	21563	29782	S	T19P	SNP	Spike	S:T19P	A21617C
EPI_ISL_453768	21618	C	T	21618	29903	S	T19I	SNP	Spike	S:T19I	C21618T
EPI_ISL_459348	21618	C	T	21564	29782	S	T19I	SNP	Spike	S:T19I	C21618T
EPI_ISL_462265	21618	C	T	21564	29782	S	T19I	SNP	Spike	S:T19I	C21618T
EPI_ISL_473437	21618	C	T	21618	29903	S	T19I	SNP	Spike	S:T19I	C21618T
EPI_ISL_453133	21618	C	A	21615	29900	S	T19K	SNP	Spike	S:T19K	C21618A
EPI_ISL_455325	21620	A	T	21620	29849	S	T20S	SNP	Spike	S:T20S	A21620T
EPI_ISL_441004	21621	C	T	21621	29903	S	T20I	SNP	Spike	S:T20I	C21621T
EPI_ISL_442322	21621	C	T	21567	29782	S	T20I	SNP	Spike	S:T20I	C21621T
EPI_ISL_444168	21621	C	T	21621	29903	S	T20I	SNP	Spike	S:T20I	C21621T
EPI_ISL_459168	21621	C	T	21567	29782	S	T20I	SNP	Spike	S:T20I	C21621T
EPI_ISL_459211	21621	C	T	21567	29782	S	T20I	SNP	Spike	S:T20I	C21621T
EPI_ISL_468098	21621	C	T	21621	29903	S	T20I	SNP	Spike	S:T20I	C21621T
EPI_ISL_469003	21621	C	T	21621	29903	S	T20I	SNP	Spike	S:T20I	C21621T
EPI_ISL_469887	21621	C	T	21567	29782	S	T20I	SNP	Spike	S:T20I	C21621T
EPI_ISL_471835	21621	C	T	21621	29903	S	T20I	SNP	Spike	S:T20I	C21621T
EPI_ISL_466788	21622	C	T	21622	29903	S	T20T	SNP_silent	Spike	S:T20T	C21622T
EPI_ISL_420070	21622	C	T	21622	29903	S	T20T	SNP_silent	Spike	S:T20T	C21622T
EPI_ISL_420978	21622	C	T	21622	29903	S	T20T	SNP_silent	Spike	S:T20T	C21622T
EPI_ISL_420998	21622	C	T	21622	29903	S	T20T	SNP_silent	Spike	S:T20T	C21622T
EPI_ISL_421502	21622	C	A	21622	29836	S	T20T	SNP_silent	Spike	S:T20T	C21622A
EPI_ISL_431972	21622	C	T	21584	29866	S	T20T	SNP_silent	Spike	S:T20T	C21622T
EPI_ISL_432690	21622	C	A	21622	29903	S	T20T	SNP_silent	Spike	S:T20T	C21622A
EPI_ISL_434014	21622	C	T	21622	29903	S	T20T	SNP_silent	Spike	S:T20T	C21622T
EPI_ISL_441636	21622	C	T	21568	29836	S	T20T	SNP_silent	Spike	S:T20T	C21622T
EPI_ISL_441744	21622	C	T	21568	29844	S	T20T	SNP_silent	Spike	S:T20T	C21622T
EPI_ISL_441764	21622	C	T	21568	29812	S	T20T	SNP_silent	Spike	S:T20T	C21622T
EPI_ISL_442623	21622	C	T	21568	29812	S	T20T	SNP_silent	Spike	S:T20T	C21622T
EPI_ISL_443068	21622	C	T	21568	29836	S	T20T	SNP_silent	Spike	S:T20T	C21622T
EPI_ISL_443070	21622	C	T	21568	29782	S	T20T	SNP_silent	Spike	S:T20T	C21622T
EPI_ISL_443474	21622	C	T	21568	29849	S	T20T	SNP_silent	Spike	S:T20T	C21622T
EPI_ISL_443536	21622	C	T	21568	29782	S	T20T	SNP_silent	Spike	S:T20T	C21622T
EPI_ISL_443561	21622	C	T	21568	29782	S	T20T	SNP_silent	Spike	S:T20T	C21622T
EPI_ISL_443567	21622	C	T	21568	29849	S	T20T	SNP_silent	Spike	S:T20T	C21622T
EPI_ISL_443598	21622	C	T	21568	29782	S	T20T	SNP_silent	Spike	S:T20T	C21622T
EPI_ISL_448510	21622	C	T	21622	29903	S	T20T	SNP_silent	Spike	S:T20T	C21622T
EPI_ISL_452004	21622	C	T	21622	29903	S	T20T	SNP_silent	Spike	S:T20T	C21622T
EPI_ISL_455971	21622	C	T	21622	29903	S	T20T	SNP_silent	Spike	S:T20T	C21622T
EPI_ISL_466653	21622	C	T	21622	29903	S	T20T	SNP_silent	Spike	S:T20T	C21622T
EPI_ISL_467298	21622	C	T	21568	29782	S	T20T	SNP_silent	Spike	S:T20T	C21622T
EPI_ISL_467507	21622	C	T	21622	29903	S	T20T	SNP_silent	Spike	S:T20T	C21622T
EPI_ISL_467520	21622	C	T	21622	29903	S	T20T	SNP_silent	Spike	S:T20T	C21622T
EPI_ISL_469891	21622	C	T	21568	29782	S	T20T	SNP_silent	Spike	S:T20T	C21622T
EPI_ISL_470387	21622	C	T	21568	29782	S	T20T	SNP_silent	Spike	S:T20T	C21622T
EPI_ISL_470519	21622	C	T	21568	29782	S	T20T	SNP_silent	Spike	S:T20T	C21622T
EPI_ISL_472839	21622	C	T	21622	29903	S	T20T	SNP_silent	Spike	S:T20T	C21622T
EPI_ISL_473094	21622	C	T	21612	29893	S	T20T	SNP_silent	Spike	S:T20T	C21622T
EPI_ISL_473155	21622	C	T	21621	29902	S	T20T	SNP_silent	Spike	S:T20T	C21622T
EPI_ISL_473188	21622	C	T	21611	29892	S	T20T	SNP_silent	Spike	S:T20T	C21622T
EPI_ISL_473213	21622	C	T	21613	29894	S	T20T	SNP_silent	Spike	S:T20T	C21622T
EPI_ISL_473242	21622	C	T	21610	29891	S	T20T	SNP_silent	Spike	S:T20T	C21622T
EPI_ISL_474489	21622	C	T	21584	29865	S	T20T	SNP_silent	Spike	S:T20T	C21622T
EPI_ISL_449124	21622	C	T	21612	29893	S	T20T	SNP_silent	Spike	S:T20T	C21622T
EPI_ISL_421206	21622	C	T	21622	29903	S	T20T	SNP_silent	Spike	S:T20T	C21622T
EPI_ISL_433743	21622	C	T	21622	29903	S	T20T	SNP_silent	Spike	S:T20T	C21622T
EPI_ISL_465543	21624	G	T	21624	29903	S	R21I	SNP	Spike	S:R21I	G21624T
EPI_ISL_465279	21624	G	T	21624	29903	S	R21I	SNP	Spike	S:R21I	G21624T
EPI_ISL_472812	21624	G	T	21623	29902	S	R21I	SNP	Spike	S:R21I	G21624T
EPI_ISL_418804	21624	G	T	21618	29864	S	R21I	SNP	Spike	S:R21I	G21624T
EPI_ISL_419447	21624	G	T	21586	29865	S	R21I	SNP	Spike	S:R21I	G21624T
EPI_ISL_420257	21624	G	T	21624	29903	S	R21I	SNP	Spike	S:R21I	G21624T
EPI_ISL_420764	21624	G	A	21624	29903	S	R21K	SNP	Spike	S:R21K	G21624A
EPI_ISL_422277	21624	G	T	21586	29865	S	R21I	SNP	Spike	S:R21I	G21624T
EPI_ISL_423532	21624	G	T	21624	29903	S	R21I	SNP	Spike	S:R21I	G21624T
EPI_ISL_425254	21624	G	T	21624	29903	S	R21I	SNP	Spike	S:R21I	G21624T
EPI_ISL_425722	21624	G	T	21570	29782	S	R21I	SNP	Spike	S:R21I	G21624T
EPI_ISL_426782	21624	G	T	21624	29903	S	R21I	SNP	Spike	S:R21I	G21624T
EPI_ISL_431949	21624	G	T	21587	29866	S	R21I	SNP	Spike	S:R21I	G21624T
EPI_ISL_432177	21624	G	T	21591	29870	S	R21I	SNP	Spike	S:R21I	G21624T
EPI_ISL_432201	21624	G	T	21620	29899	S	R21I	SNP	Spike	S:R21I	G21624T
EPI_ISL_432211	21624	G	T	21624	29903	S	R21I	SNP	Spike	S:R21I	G21624T
EPI_ISL_432261	21624	G	T	21620	29899	S	R21I	SNP	Spike	S:R21I	G21624T
EPI_ISL_432343	21624	G	T	21624	29903	S	R21I	SNP	Spike	S:R21I	G21624T
EPI_ISL_432410	21624	G	T	21588	29867	S	R21I	SNP	Spike	S:R21I	G21624T
EPI_ISL_432692	21624	G	T	21624	29903	S	R21I	SNP	Spike	S:R21I	G21624T
EPI_ISL_433280	21624	G	T	21570	29782	S	R21I	SNP	Spike	S:R21I	G21624T
EPI_ISL_433286	21624	G	T	21570	29782	S	R21I	SNP	Spike	S:R21I	G21624T
EPI_ISL_438272	21624	G	T	21570	29782	S	R21I	SNP	Spike	S:R21I	G21624T
EPI_ISL_438383	21624	G	T	21570	29812	S	R21I	SNP	Spike	S:R21I	G21624T
EPI_ISL_438392	21624	G	T	21570	29849	S	R21I	SNP	Spike	S:R21I	G21624T
EPI_ISL_438424	21624	G	T	21570	29782	S	R21I	SNP	Spike	S:R21I	G21624T
EPI_ISL_439689	21624	G	T	21624	29903	S	R21I	SNP	Spike	S:R21I	G21624T
EPI_ISL_439715	21624	G	T	21624	29903	S	R21I	SNP	Spike	S:R21I	G21624T
EPI_ISL_439757	21624	G	T	21624	29903	S	R21I	SNP	Spike	S:R21I	G21624T
EPI_ISL_439770	21624	G	T	21624	29903	S	R21I	SNP	Spike	S:R21I	G21624T
EPI_ISL_439820	21624	G	T	21624	29903	S	R21I	SNP	Spike	S:R21I	G21624T
EPI_ISL_440595	21624	G	T	21570	29849	S	R21I	SNP	Spike	S:R21I	G21624T
EPI_ISL_440625	21624	G	T	21570	29804	S	R21I	SNP	Spike	S:R21I	G21624T
EPI_ISL_440786	21624	G	T	21570	29782	S	R21I	SNP	Spike	S:R21I	G21624T
EPI_ISL_440830	21624	G	T	21570	29849	S	R21I	SNP	Spike	S:R21I	G21624T
EPI_ISL_440865	21624	G	T	21624	29903	S	R21I	SNP	Spike	S:R21I	G21624T
EPI_ISL_440891	21624	G	T	21624	29903	S	R21I	SNP	Spike	S:R21I	G21624T
EPI_ISL_440913	21624	G	T	21624	29903	S	R21I	SNP	Spike	S:R21I	G21624T
EPI_ISL_440915	21624	G	T	21624	29903	S	R21I	SNP	Spike	S:R21I	G21624T
EPI_ISL_440925	21624	G	T	21624	29903	S	R21I	SNP	Spike	S:R21I	G21624T
EPI_ISL_440933	21624	G	T	21624	29903	S	R21I	SNP	Spike	S:R21I	G21624T
EPI_ISL_440939	21624	G	T	21624	29903	S	R21I	SNP	Spike	S:R21I	G21624T
EPI_ISL_441444	21624	G	T	21624	29903	S	R21I	SNP	Spike	S:R21I	G21624T
EPI_ISL_441453	21624	G	T	21624	29903	S	R21I	SNP	Spike	S:R21I	G21624T
EPI_ISL_441768	21624	G	T	21570	29782	S	R21I	SNP	Spike	S:R21I	G21624T
EPI_ISL_442327	21624	G	T	21570	29782	S	R21I	SNP	Spike	S:R21I	G21624T
EPI_ISL_442333	21624	G	T	21570	29849	S	R21I	SNP	Spike	S:R21I	G21624T
EPI_ISL_442647	21624	G	T	21570	29782	S	R21I	SNP	Spike	S:R21I	G21624T
EPI_ISL_442667	21624	G	T	21570	29812	S	R21I	SNP	Spike	S:R21I	G21624T
EPI_ISL_443807	21624	G	T	21570	29782	S	R21I	SNP	Spike	S:R21I	G21624T
EPI_ISL_443945	21624	G	T	21570	29782	S	R21I	SNP	Spike	S:R21I	G21624T
EPI_ISL_443989	21624	G	T	21570	29812	S	R21I	SNP	Spike	S:R21I	G21624T
EPI_ISL_444304	21624	G	T	21624	29903	S	R21I	SNP	Spike	S:R21I	G21624T
EPI_ISL_444894	21624	G	T	21624	29903	S	R21I	SNP	Spike	S:R21I	G21624T
EPI_ISL_444900	21624	G	T	21624	29903	S	R21I	SNP	Spike	S:R21I	G21624T
EPI_ISL_445383	21624	G	T	21587	29866	S	R21I	SNP	Spike	S:R21I	G21624T
EPI_ISL_445526	21624	G	T	21586	29865	S	R21I	SNP	Spike	S:R21I	G21624T
EPI_ISL_445530	21624	G	T	21624	29903	S	R21I	SNP	Spike	S:R21I	G21624T
EPI_ISL_445535	21624	G	T	21624	29903	S	R21I	SNP	Spike	S:R21I	G21624T
EPI_ISL_445536	21624	G	T	21622	29901	S	R21I	SNP	Spike	S:R21I	G21624T
EPI_ISL_445641	21624	G	T	21624	29903	S	R21I	SNP	Spike	S:R21I	G21624T
EPI_ISL_445651	21624	G	T	21623	29902	S	R21I	SNP	Spike	S:R21I	G21624T
EPI_ISL_445657	21624	G	T	21616	29895	S	R21I	SNP	Spike	S:R21I	G21624T
EPI_ISL_445762	21624	G	T	21619	29898	S	R21I	SNP	Spike	S:R21I	G21624T
EPI_ISL_445843	21624	G	T	21613	29892	S	R21I	SNP	Spike	S:R21I	G21624T
EPI_ISL_445857	21624	G	T	21607	29886	S	R21I	SNP	Spike	S:R21I	G21624T
EPI_ISL_445863	21624	G	T	21622	29901	S	R21I	SNP	Spike	S:R21I	G21624T
EPI_ISL_445867	21624	G	T	21621	29900	S	R21I	SNP	Spike	S:R21I	G21624T
EPI_ISL_445870	21624	G	T	21624	29903	S	R21I	SNP	Spike	S:R21I	G21624T
EPI_ISL_445999	21624	G	T	21612	29891	S	R21I	SNP	Spike	S:R21I	G21624T
EPI_ISL_446036	21624	G	T	21586	29865	S	R21I	SNP	Spike	S:R21I	G21624T
EPI_ISL_446062	21624	G	T	21615	29894	S	R21I	SNP	Spike	S:R21I	G21624T
EPI_ISL_446064	21624	G	T	21624	29903	S	R21I	SNP	Spike	S:R21I	G21624T
EPI_ISL_446065	21624	G	T	21624	29903	S	R21I	SNP	Spike	S:R21I	G21624T
EPI_ISL_446068	21624	G	T	21624	29903	S	R21I	SNP	Spike	S:R21I	G21624T
EPI_ISL_446074	21624	G	T	21586	29865	S	R21I	SNP	Spike	S:R21I	G21624T
EPI_ISL_446080	21624	G	T	21624	29903	S	R21I	SNP	Spike	S:R21I	G21624T
EPI_ISL_446085	21624	G	T	21622	29901	S	R21I	SNP	Spike	S:R21I	G21624T
EPI_ISL_446101	21624	G	T	21622	29901	S	R21I	SNP	Spike	S:R21I	G21624T
EPI_ISL_446104	21624	G	T	21620	29899	S	R21I	SNP	Spike	S:R21I	G21624T
EPI_ISL_446161	21624	G	T	21615	29894	S	R21I	SNP	Spike	S:R21I	G21624T
EPI_ISL_446232	21624	G	T	21623	29902	S	R21I	SNP	Spike	S:R21I	G21624T
EPI_ISL_446239	21624	G	T	21624	29903	S	R21I	SNP	Spike	S:R21I	G21624T
EPI_ISL_446258	21624	G	T	21586	29865	S	R21I	SNP	Spike	S:R21I	G21624T
EPI_ISL_446262	21624	G	T	21587	29866	S	R21I	SNP	Spike	S:R21I	G21624T
EPI_ISL_446263	21624	G	T	21586	29865	S	R21I	SNP	Spike	S:R21I	G21624T
EPI_ISL_446265	21624	G	T	21587	29866	S	R21I	SNP	Spike	S:R21I	G21624T
EPI_ISL_446327	21624	G	T	21594	29873	S	R21I	SNP	Spike	S:R21I	G21624T
EPI_ISL_446333	21624	G	T	21620	29899	S	R21I	SNP	Spike	S:R21I	G21624T
EPI_ISL_446337	21624	G	T	21624	29903	S	R21I	SNP	Spike	S:R21I	G21624T
EPI_ISL_446351	21624	G	T	21620	29899	S	R21I	SNP	Spike	S:R21I	G21624T
EPI_ISL_446352	21624	G	T	21620	29899	S	R21I	SNP	Spike	S:R21I	G21624T
EPI_ISL_446437	21624	G	T	21620	29899	S	R21I	SNP	Spike	S:R21I	G21624T
EPI_ISL_446460	21624	G	T	21622	29901	S	R21I	SNP	Spike	S:R21I	G21624T
EPI_ISL_446474	21624	G	T	21624	29903	S	R21I	SNP	Spike	S:R21I	G21624T
EPI_ISL_446485	21624	G	T	21616	29895	S	R21I	SNP	Spike	S:R21I	G21624T
EPI_ISL_446528	21624	G	T	21619	29898	S	R21I	SNP	Spike	S:R21I	G21624T
EPI_ISL_446529	21624	G	T	21599	29878	S	R21I	SNP	Spike	S:R21I	G21624T
EPI_ISL_446531	21624	G	T	21620	29899	S	R21I	SNP	Spike	S:R21I	G21624T
EPI_ISL_446583	21624	G	T	21589	29868	S	R21I	SNP	Spike	S:R21I	G21624T
EPI_ISL_446631	21624	G	T	21622	29901	S	R21I	SNP	Spike	S:R21I	G21624T
EPI_ISL_446633	21624	G	T	21594	29873	S	R21I	SNP	Spike	S:R21I	G21624T
EPI_ISL_446638	21624	G	T	21622	29901	S	R21I	SNP	Spike	S:R21I	G21624T
EPI_ISL_446714	21624	G	T	21620	29899	S	R21I	SNP	Spike	S:R21I	G21624T
EPI_ISL_446733	21624	G	T	21624	29903	S	R21I	SNP	Spike	S:R21I	G21624T
EPI_ISL_446741	21624	G	T	21620	29899	S	R21I	SNP	Spike	S:R21I	G21624T
EPI_ISL_446751	21624	G	T	21624	29903	S	R21I	SNP	Spike	S:R21I	G21624T
EPI_ISL_446753	21624	G	T	21615	29894	S	R21I	SNP	Spike	S:R21I	G21624T
EPI_ISL_446754	21624	G	T	21587	29864	S	R21I	SNP	Spike	S:R21I	G21624T
EPI_ISL_446768	21624	G	T	21593	29872	S	R21I	SNP	Spike	S:R21I	G21624T
EPI_ISL_446774	21624	G	T	21624	29903	S	R21I	SNP	Spike	S:R21I	G21624T
EPI_ISL_446798	21624	G	T	21615	29894	S	R21I	SNP	Spike	S:R21I	G21624T
EPI_ISL_446804	21624	G	T	21619	29898	S	R21I	SNP	Spike	S:R21I	G21624T
EPI_ISL_446860	21624	G	T	21613	29892	S	R21I	SNP	Spike	S:R21I	G21624T
EPI_ISL_446868	21624	G	T	21620	29899	S	R21I	SNP	Spike	S:R21I	G21624T
EPI_ISL_446873	21624	G	T	21622	29901	S	R21I	SNP	Spike	S:R21I	G21624T
EPI_ISL_446884	21624	G	T	21620	29899	S	R21I	SNP	Spike	S:R21I	G21624T
EPI_ISL_446889	21624	G	T	21601	29880	S	R21I	SNP	Spike	S:R21I	G21624T
EPI_ISL_446896	21624	G	T	21621	29900	S	R21I	SNP	Spike	S:R21I	G21624T
EPI_ISL_446963	21624	G	T	21615	29894	S	R21I	SNP	Spike	S:R21I	G21624T
EPI_ISL_446970	21624	G	T	21615	29894	S	R21I	SNP	Spike	S:R21I	G21624T
EPI_ISL_446980	21624	G	T	21586	29865	S	R21I	SNP	Spike	S:R21I	G21624T
EPI_ISL_446985	21624	G	T	21586	29865	S	R21I	SNP	Spike	S:R21I	G21624T
EPI_ISL_446990	21624	G	T	21608	29887	S	R21I	SNP	Spike	S:R21I	G21624T
EPI_ISL_447940	21624	G	T	21624	29903	S	R21I	SNP	Spike	S:R21I	G21624T
EPI_ISL_448406	21624	G	T	21624	29901	S	R21I	SNP	Spike	S:R21I	G21624T
EPI_ISL_448478	21624	G	T	21624	29903	S	R21I	SNP	Spike	S:R21I	G21624T
EPI_ISL_449409	21624	G	T	21595	29837	S	R21I	SNP	Spike	S:R21I	G21624T
EPI_ISL_449463	21624	G	T	21614	29856	S	R21I	SNP	Spike	S:R21I	G21624T
EPI_ISL_449505	21624	G	T	21614	29893	S	R21I	SNP	Spike	S:R21I	G21624T
EPI_ISL_449564	21624	G	T	21594	29836	S	R21I	SNP	Spike	S:R21I	G21624T
EPI_ISL_453241	21624	G	T	21599	29878	S	R21I	SNP	Spike	S:R21I	G21624T
EPI_ISL_453285	21624	G	T	21594	29836	S	R21I	SNP	Spike	S:R21I	G21624T
EPI_ISL_453311	21624	G	T	21594	29836	S	R21I	SNP	Spike	S:R21I	G21624T
EPI_ISL_453615	21624	G	T	21624	29901	S	R21I	SNP	Spike	S:R21I	G21624T
EPI_ISL_453616	21624	G	T	21624	29901	S	R21I	SNP	Spike	S:R21I	G21624T
EPI_ISL_453663	21624	G	T	21624	29903	S	R21I	SNP	Spike	S:R21I	G21624T
EPI_ISL_457057	21624	G	T	21624	29903	S	R21I	SNP	Spike	S:R21I	G21624T
EPI_ISL_457088	21624	G	T	21624	29903	S	R21I	SNP	Spike	S:R21I	G21624T
EPI_ISL_457576	21624	G	T	21624	29903	S	R21I	SNP	Spike	S:R21I	G21624T
EPI_ISL_457989	21624	G	T	21624	29903	S	R21I	SNP	Spike	S:R21I	G21624T
EPI_ISL_458166	21624	G	C	21570	29782	S	R21T	SNP	Spike	S:R21T	G21624C
EPI_ISL_458839	21624	G	T	21570	29782	S	R21I	SNP	Spike	S:R21I	G21624T
EPI_ISL_459572	21624	G	T	21570	29782	S	R21I	SNP	Spike	S:R21I	G21624T
EPI_ISL_459575	21624	G	T	21570	29782	S	R21I	SNP	Spike	S:R21I	G21624T
EPI_ISL_459707	21624	G	T	21570	29782	S	R21I	SNP	Spike	S:R21I	G21624T
EPI_ISL_461526	21624	G	T	21624	29903	S	R21I	SNP	Spike	S:R21I	G21624T
EPI_ISL_461900	21624	G	T	21624	29901	S	R21I	SNP	Spike	S:R21I	G21624T
EPI_ISL_461907	21624	G	T	21624	29901	S	R21I	SNP	Spike	S:R21I	G21624T
EPI_ISL_461915	21624	G	T	21624	29901	S	R21I	SNP	Spike	S:R21I	G21624T
EPI_ISL_461921	21624	G	T	21624	29903	S	R21I	SNP	Spike	S:R21I	G21624T
EPI_ISL_461942	21624	G	T	21624	29901	S	R21I	SNP	Spike	S:R21I	G21624T
EPI_ISL_461945	21624	G	T	21624	29901	S	R21I	SNP	Spike	S:R21I	G21624T
EPI_ISL_461947	21624	G	T	21624	29901	S	R21I	SNP	Spike	S:R21I	G21624T
EPI_ISL_461954	21624	G	T	21624	29901	S	R21I	SNP	Spike	S:R21I	G21624T
EPI_ISL_461958	21624	G	T	21624	29901	S	R21I	SNP	Spike	S:R21I	G21624T
EPI_ISL_461963	21624	G	T	21624	29901	S	R21I	SNP	Spike	S:R21I	G21624T
EPI_ISL_461969	21624	G	T	21624	29903	S	R21I	SNP	Spike	S:R21I	G21624T
EPI_ISL_465191	21624	G	T	21624	29903	S	R21I	SNP	Spike	S:R21I	G21624T
EPI_ISL_465222	21624	G	T	21624	29903	S	R21I	SNP	Spike	S:R21I	G21624T
EPI_ISL_465824	21624	G	T	21624	29903	S	R21I	SNP	Spike	S:R21I	G21624T
EPI_ISL_465954	21624	G	T	21624	29903	S	R21I	SNP	Spike	S:R21I	G21624T
EPI_ISL_465955	21624	G	T	21623	29902	S	R21I	SNP	Spike	S:R21I	G21624T
EPI_ISL_465990	21624	G	A	21624	29903	S	R21K	SNP	Spike	S:R21K	G21624A
EPI_ISL_466052	21624	G	T	21624	29903	S	R21I	SNP	Spike	S:R21I	G21624T
EPI_ISL_466111	21624	G	A	21624	29903	S	R21K	SNP	Spike	S:R21K	G21624A
EPI_ISL_466118	21624	G	A	21624	29903	S	R21K	SNP	Spike	S:R21K	G21624A
EPI_ISL_466239	21624	G	T	21624	29903	S	R21I	SNP	Spike	S:R21I	G21624T
EPI_ISL_466371	21624	G	T	21623	29902	S	R21I	SNP	Spike	S:R21I	G21624T
EPI_ISL_466424	21624	G	T	21623	29902	S	R21I	SNP	Spike	S:R21I	G21624T
EPI_ISL_466474	21624	G	T	21624	29903	S	R21I	SNP	Spike	S:R21I	G21624T
EPI_ISL_466476	21624	G	T	21624	29903	S	R21I	SNP	Spike	S:R21I	G21624T
EPI_ISL_466611	21624	G	T	21624	29903	S	R21I	SNP	Spike	S:R21I	G21624T
EPI_ISL_466612	21624	G	T	21624	29903	S	R21I	SNP	Spike	S:R21I	G21624T
EPI_ISL_467694	21624	G	T	21570	29782	S	R21I	SNP	Spike	S:R21I	G21624T
EPI_ISL_469473	21624	G	T	21570	29782	S	R21I	SNP	Spike	S:R21I	G21624T
EPI_ISL_469499	21624	G	T	21570	29782	S	R21I	SNP	Spike	S:R21I	G21624T
EPI_ISL_469500	21624	G	T	21570	29782	S	R21I	SNP	Spike	S:R21I	G21624T
EPI_ISL_469698	21624	G	T	21570	29782	S	R21I	SNP	Spike	S:R21I	G21624T
EPI_ISL_469827	21624	G	T	21570	29782	S	R21I	SNP	Spike	S:R21I	G21624T
EPI_ISL_472384	21624	G	T	21624	29901	S	R21I	SNP	Spike	S:R21I	G21624T
EPI_ISL_472390	21624	G	T	21624	29903	S	R21I	SNP	Spike	S:R21I	G21624T
EPI_ISL_472401	21624	G	T	21624	29901	S	R21I	SNP	Spike	S:R21I	G21624T
EPI_ISL_472416	21624	G	T	21624	29901	S	R21I	SNP	Spike	S:R21I	G21624T
EPI_ISL_472437	21624	G	T	21607	29886	S	R21I	SNP	Spike	S:R21I	G21624T
EPI_ISL_472452	21624	G	T	21624	29903	S	R21I	SNP	Spike	S:R21I	G21624T
EPI_ISL_472453	21624	G	T	21587	29866	S	R21I	SNP	Spike	S:R21I	G21624T
EPI_ISL_472459	21624	G	T	21621	29900	S	R21I	SNP	Spike	S:R21I	G21624T
EPI_ISL_472465	21624	G	T	21591	29870	S	R21I	SNP	Spike	S:R21I	G21624T
EPI_ISL_472470	21624	G	T	21599	29878	S	R21I	SNP	Spike	S:R21I	G21624T
EPI_ISL_472475	21624	G	T	21587	29866	S	R21I	SNP	Spike	S:R21I	G21624T
EPI_ISL_472483	21624	G	T	21622	29901	S	R21I	SNP	Spike	S:R21I	G21624T
EPI_ISL_472498	21624	G	T	21620	29899	S	R21I	SNP	Spike	S:R21I	G21624T
EPI_ISL_472500	21624	G	T	21612	29891	S	R21I	SNP	Spike	S:R21I	G21624T
EPI_ISL_472517	21624	G	T	21588	29867	S	R21I	SNP	Spike	S:R21I	G21624T
EPI_ISL_472543	21624	G	T	21594	29873	S	R21I	SNP	Spike	S:R21I	G21624T
EPI_ISL_472555	21624	G	T	21586	29865	S	R21I	SNP	Spike	S:R21I	G21624T
EPI_ISL_472571	21624	G	T	21586	29865	S	R21I	SNP	Spike	S:R21I	G21624T
EPI_ISL_472584	21624	G	T	21616	29895	S	R21I	SNP	Spike	S:R21I	G21624T
EPI_ISL_472624	21624	G	T	21608	29887	S	R21I	SNP	Spike	S:R21I	G21624T
EPI_ISL_472629	21624	G	T	21589	29868	S	R21I	SNP	Spike	S:R21I	G21624T
EPI_ISL_472633	21624	G	T	21586	29865	S	R21I	SNP	Spike	S:R21I	G21624T
EPI_ISL_472670	21624	G	T	21624	29903	S	R21I	SNP	Spike	S:R21I	G21624T
EPI_ISL_472716	21624	G	T	21624	29903	S	R21I	SNP	Spike	S:R21I	G21624T
EPI_ISL_472724	21624	G	T	21587	29866	S	R21I	SNP	Spike	S:R21I	G21624T
EPI_ISL_472734	21624	G	T	21620	29899	S	R21I	SNP	Spike	S:R21I	G21624T
EPI_ISL_472753	21624	G	T	21623	29902	S	R21I	SNP	Spike	S:R21I	G21624T
EPI_ISL_472766	21624	G	T	21593	29872	S	R21I	SNP	Spike	S:R21I	G21624T
EPI_ISL_472773	21624	G	T	21587	29866	S	R21I	SNP	Spike	S:R21I	G21624T
EPI_ISL_472778	21624	G	T	21620	29899	S	R21I	SNP	Spike	S:R21I	G21624T
EPI_ISL_472780	21624	G	T	21621	29900	S	R21I	SNP	Spike	S:R21I	G21624T
EPI_ISL_472789	21624	G	T	21587	29866	S	R21I	SNP	Spike	S:R21I	G21624T
EPI_ISL_472805	21624	G	T	21623	29902	S	R21I	SNP	Spike	S:R21I	G21624T
EPI_ISL_472819	21624	G	T	21586	29865	S	R21I	SNP	Spike	S:R21I	G21624T
EPI_ISL_472854	21624	G	T	21624	29903	S	R21I	SNP	Spike	S:R21I	G21624T
EPI_ISL_472859	21624	G	T	21591	29870	S	R21I	SNP	Spike	S:R21I	G21624T
EPI_ISL_472867	21624	G	T	21590	29869	S	R21I	SNP	Spike	S:R21I	G21624T
EPI_ISL_472892	21624	G	T	21622	29901	S	R21I	SNP	Spike	S:R21I	G21624T
EPI_ISL_472902	21624	G	T	21620	29899	S	R21I	SNP	Spike	S:R21I	G21624T
EPI_ISL_472910	21624	G	T	21619	29898	S	R21I	SNP	Spike	S:R21I	G21624T
EPI_ISL_472924	21624	G	T	21617	29896	S	R21I	SNP	Spike	S:R21I	G21624T
EPI_ISL_472952	21624	G	T	21624	29903	S	R21I	SNP	Spike	S:R21I	G21624T
EPI_ISL_472963	21624	G	T	21612	29891	S	R21I	SNP	Spike	S:R21I	G21624T
EPI_ISL_472986	21624	G	T	21589	29868	S	R21I	SNP	Spike	S:R21I	G21624T
EPI_ISL_473024	21624	G	T	21621	29900	S	R21I	SNP	Spike	S:R21I	G21624T
EPI_ISL_473025	21624	G	T	21614	29893	S	R21I	SNP	Spike	S:R21I	G21624T
EPI_ISL_473041	21624	G	T	21588	29867	S	R21I	SNP	Spike	S:R21I	G21624T
EPI_ISL_473053	21624	G	T	21621	29900	S	R21I	SNP	Spike	S:R21I	G21624T
EPI_ISL_473061	21624	G	T	21624	29903	S	R21I	SNP	Spike	S:R21I	G21624T
EPI_ISL_473090	21624	G	T	21624	29903	S	R21I	SNP	Spike	S:R21I	G21624T
EPI_ISL_473098	21624	G	T	21586	29865	S	R21I	SNP	Spike	S:R21I	G21624T
EPI_ISL_473103	21624	G	T	21587	29866	S	R21I	SNP	Spike	S:R21I	G21624T
EPI_ISL_473108	21624	G	T	21609	29888	S	R21I	SNP	Spike	S:R21I	G21624T
EPI_ISL_473116	21624	G	T	21594	29860	S	R21I	SNP	Spike	S:R21I	G21624T
EPI_ISL_473121	21624	G	T	21596	29875	S	R21I	SNP	Spike	S:R21I	G21624T
EPI_ISL_473122	21624	G	T	21620	29899	S	R21I	SNP	Spike	S:R21I	G21624T
EPI_ISL_473125	21624	G	T	21624	29903	S	R21I	SNP	Spike	S:R21I	G21624T
EPI_ISL_473139	21624	G	T	21612	29891	S	R21I	SNP	Spike	S:R21I	G21624T
EPI_ISL_473160	21624	G	T	21592	29871	S	R21I	SNP	Spike	S:R21I	G21624T
EPI_ISL_473163	21624	G	T	21614	29893	S	R21I	SNP	Spike	S:R21I	G21624T
EPI_ISL_473177	21624	G	T	21587	29866	S	R21I	SNP	Spike	S:R21I	G21624T
EPI_ISL_473179	21624	G	T	21607	29886	S	R21I	SNP	Spike	S:R21I	G21624T
EPI_ISL_473181	21624	G	T	21586	29865	S	R21I	SNP	Spike	S:R21I	G21624T
EPI_ISL_473185	21624	G	T	21586	29865	S	R21I	SNP	Spike	S:R21I	G21624T
EPI_ISL_473191	21624	G	T	21587	29866	S	R21I	SNP	Spike	S:R21I	G21624T
EPI_ISL_473195	21624	G	T	21601	29880	S	R21I	SNP	Spike	S:R21I	G21624T
EPI_ISL_473200	21624	G	T	21620	29899	S	R21I	SNP	Spike	S:R21I	G21624T
EPI_ISL_473204	21624	G	T	21588	29867	S	R21I	SNP	Spike	S:R21I	G21624T
EPI_ISL_473207	21624	G	T	21588	29867	S	R21I	SNP	Spike	S:R21I	G21624T
EPI_ISL_473220	21624	G	T	21589	29868	S	R21I	SNP	Spike	S:R21I	G21624T
EPI_ISL_473226	21624	G	T	21596	29875	S	R21I	SNP	Spike	S:R21I	G21624T
EPI_ISL_473229	21624	G	T	21621	29900	S	R21I	SNP	Spike	S:R21I	G21624T
EPI_ISL_473235	21624	G	T	21614	29893	S	R21I	SNP	Spike	S:R21I	G21624T
EPI_ISL_473245	21624	G	T	21600	29879	S	R21I	SNP	Spike	S:R21I	G21624T
EPI_ISL_473246	21624	G	T	21586	29865	S	R21I	SNP	Spike	S:R21I	G21624T
EPI_ISL_473257	21624	G	T	21616	29895	S	R21I	SNP	Spike	S:R21I	G21624T
EPI_ISL_473261	21624	G	T	21620	29899	S	R21I	SNP	Spike	S:R21I	G21624T
EPI_ISL_473262	21624	G	T	21600	29879	S	R21I	SNP	Spike	S:R21I	G21624T
EPI_ISL_473265	21624	G	T	21586	29865	S	R21I	SNP	Spike	S:R21I	G21624T
EPI_ISL_473274	21624	G	T	21586	29865	S	R21I	SNP	Spike	S:R21I	G21624T
EPI_ISL_473277	21624	G	T	21612	29891	S	R21I	SNP	Spike	S:R21I	G21624T
EPI_ISL_473280	21624	G	T	21621	29900	S	R21I	SNP	Spike	S:R21I	G21624T
EPI_ISL_473328	21624	G	T	21624	29903	S	R21I	SNP	Spike	S:R21I	G21624T
EPI_ISL_473956	21624	G	T	21593	29872	S	R21I	SNP	Spike	S:R21I	G21624T
EPI_ISL_473963	21624	G	T	21586	29865	S	R21I	SNP	Spike	S:R21I	G21624T
EPI_ISL_473970	21624	G	T	21620	29899	S	R21I	SNP	Spike	S:R21I	G21624T
EPI_ISL_474000	21624	G	T	21588	29867	S	R21I	SNP	Spike	S:R21I	G21624T
EPI_ISL_474022	21624	G	T	21621	29900	S	R21I	SNP	Spike	S:R21I	G21624T
EPI_ISL_474047	21624	G	T	21624	29903	S	R21I	SNP	Spike	S:R21I	G21624T
EPI_ISL_474058	21624	G	T	21622	29901	S	R21I	SNP	Spike	S:R21I	G21624T
EPI_ISL_474071	21624	G	T	21622	29901	S	R21I	SNP	Spike	S:R21I	G21624T
EPI_ISL_474073	21624	G	T	21624	29903	S	R21I	SNP	Spike	S:R21I	G21624T
EPI_ISL_474095	21624	G	T	21623	29902	S	R21I	SNP	Spike	S:R21I	G21624T
EPI_ISL_474105	21624	G	T	21623	29902	S	R21I	SNP	Spike	S:R21I	G21624T
EPI_ISL_474116	21624	G	T	21587	29866	S	R21I	SNP	Spike	S:R21I	G21624T
EPI_ISL_474162	21624	G	T	21620	29899	S	R21I	SNP	Spike	S:R21I	G21624T
EPI_ISL_474165	21624	G	T	21605	29884	S	R21I	SNP	Spike	S:R21I	G21624T
EPI_ISL_474190	21624	G	T	21621	29900	S	R21I	SNP	Spike	S:R21I	G21624T
EPI_ISL_474204	21624	G	T	21614	29893	S	R21I	SNP	Spike	S:R21I	G21624T
EPI_ISL_474242	21624	G	T	21586	29865	S	R21I	SNP	Spike	S:R21I	G21624T
EPI_ISL_474305	21624	G	T	21613	29892	S	R21I	SNP	Spike	S:R21I	G21624T
EPI_ISL_474308	21624	G	T	21581	29860	S	R21I	SNP	Spike	S:R21I	G21624T
EPI_ISL_474364	21624	G	T	21620	29899	S	R21I	SNP	Spike	S:R21I	G21624T
EPI_ISL_474371	21624	G	T	21614	29893	S	R21I	SNP	Spike	S:R21I	G21624T
EPI_ISL_474375	21624	G	T	21624	29903	S	R21I	SNP	Spike	S:R21I	G21624T
EPI_ISL_474377	21624	G	T	21624	29903	S	R21I	SNP	Spike	S:R21I	G21624T
EPI_ISL_474383	21624	G	T	21620	29899	S	R21I	SNP	Spike	S:R21I	G21624T
EPI_ISL_474385	21624	G	T	21624	29903	S	R21I	SNP	Spike	S:R21I	G21624T
EPI_ISL_474386	21624	G	T	21623	29902	S	R21I	SNP	Spike	S:R21I	G21624T
EPI_ISL_474389	21624	G	T	21594	29873	S	R21I	SNP	Spike	S:R21I	G21624T
EPI_ISL_474394	21624	G	T	21601	29880	S	R21I	SNP	Spike	S:R21I	G21624T
EPI_ISL_474395	21624	G	T	21588	29867	S	R21I	SNP	Spike	S:R21I	G21624T
EPI_ISL_474404	21624	G	T	21586	29865	S	R21I	SNP	Spike	S:R21I	G21624T
EPI_ISL_474406	21624	G	T	21594	29873	S	R21I	SNP	Spike	S:R21I	G21624T
EPI_ISL_474421	21624	G	T	21575	29854	S	R21I	SNP	Spike	S:R21I	G21624T
EPI_ISL_474432	21624	G	T	21624	29903	S	R21I	SNP	Spike	S:R21I	G21624T
EPI_ISL_474464	21624	G	T	21620	29899	S	R21I	SNP	Spike	S:R21I	G21624T
EPI_ISL_474567	21624	G	T	21620	29899	S	R21I	SNP	Spike	S:R21I	G21624T
EPI_ISL_474573	21624	G	T	21624	29903	S	R21I	SNP	Spike	S:R21I	G21624T
EPI_ISL_474577	21624	G	T	21593	29872	S	R21I	SNP	Spike	S:R21I	G21624T
EPI_ISL_474613	21624	G	T	21612	29891	S	R21I	SNP	Spike	S:R21I	G21624T
EPI_ISL_474630	21624	G	T	21621	29900	S	R21I	SNP	Spike	S:R21I	G21624T
EPI_ISL_474647	21624	G	T	21588	29867	S	R21I	SNP	Spike	S:R21I	G21624T
EPI_ISL_474666	21624	G	T	21607	29886	S	R21I	SNP	Spike	S:R21I	G21624T
EPI_ISL_474674	21624	G	T	21621	29900	S	R21I	SNP	Spike	S:R21I	G21624T
EPI_ISL_474684	21624	G	T	21624	29903	S	R21I	SNP	Spike	S:R21I	G21624T
EPI_ISL_474686	21624	G	T	21620	29899	S	R21I	SNP	Spike	S:R21I	G21624T
EPI_ISL_474702	21624	G	T	21620	29899	S	R21I	SNP	Spike	S:R21I	G21624T
EPI_ISL_474715	21624	G	T	21624	29903	S	R21I	SNP	Spike	S:R21I	G21624T
EPI_ISL_474750	21624	G	T	21620	29899	S	R21I	SNP	Spike	S:R21I	G21624T
EPI_ISL_474753	21624	G	T	21620	29899	S	R21I	SNP	Spike	S:R21I	G21624T
EPI_ISL_474772	21624	G	T	21588	29867	S	R21I	SNP	Spike	S:R21I	G21624T
EPI_ISL_444569	21624	G	C	21624	29903	S	R21T	SNP	Spike	S:R21T	G21624C
EPI_ISL_453312	21624	G	C	21591	29870	S	R21T	SNP	Spike	S:R21T	G21624C
EPI_ISL_471256	21624	G	C	21570	29782	S	R21T	SNP	Spike	S:R21T	G21624C
EPI_ISL_433283	21624	G	A	21570	29810	S	R21K	SNP	Spike	S:R21K	G21624A
EPI_ISL_444971	21625	A	G	21625	29903	S	R21R	SNP_silent	Spike	S:R21R	A21625G
EPI_ISL_449128	21625	A	G	21623	29901	S	R21R	SNP_silent	Spike	S:R21R	A21625G
EPI_ISL_453599	21625	A	G	21624	29902	S	R21R	SNP_silent	Spike	S:R21R	A21625G
EPI_ISL_415631	21625	A	G	21625	29903	S	R21R	SNP_silent	Spike	S:R21R	A21625G
EPI_ISL_422156	21625	A	G	21621	29899	S	R21R	SNP_silent	Spike	S:R21R	A21625G
EPI_ISL_439967	21625	A	G	21571	29782	S	R21R	SNP_silent	Spike	S:R21R	A21625G
EPI_ISL_443935	21625	A	G	21571	29783	S	R21R	SNP_silent	Spike	S:R21R	A21625G
EPI_ISL_446915	21625	A	G	21587	29865	S	R21R	SNP_silent	Spike	S:R21R	A21625G
EPI_ISL_458544	21625	A	G	21571	29782	S	R21R	SNP_silent	Spike	S:R21R	A21625G
EPI_ISL_459089	21625	A	G	21571	29782	S	R21R	SNP_silent	Spike	S:R21R	A21625G
EPI_ISL_464876	21625	A	G	21625	29903	S	R21R	SNP_silent	Spike	S:R21R	A21625G
EPI_ISL_465053	21625	A	G	21625	29903	S	R21R	SNP_silent	Spike	S:R21R	A21625G
EPI_ISL_465079	21625	A	G	21625	29903	S	R21R	SNP_silent	Spike	S:R21R	A21625G
EPI_ISL_466066	21625	A	G	21625	29903	S	R21R	SNP_silent	Spike	S:R21R	A21625G
EPI_ISL_472206	21625	A	G	21625	29903	S	R21R	SNP_silent	Spike	S:R21R	A21625G
EPI_ISL_472800	21625	A	G	21593	29871	S	R21R	SNP_silent	Spike	S:R21R	A21625G
EPI_ISL_472921	21625	A	G	21587	29865	S	R21R	SNP_silent	Spike	S:R21R	A21625G
EPI_ISL_439888	21626	A	G	21572	29782	S	T22A	SNP	Spike	S:T22A	A21626G
EPI_ISL_450461	21626	A	G	21613	29861	S	T22A	SNP	Spike	S:T22A	A21626G
EPI_ISL_452195	21627	C	T	21602	29805	S	T22I	SNP	Spike	S:T22I	C21627T
EPI_ISL_422569	21627	C	T	21573	29775	S	T22I	SNP	Spike	S:T22I	C21627T
EPI_ISL_445136	21627	C	T	21627	29903	S	T22I	SNP	Spike	S:T22I	C21627T
EPI_ISL_445144	21627	C	T	21627	29903	S	T22I	SNP	Spike	S:T22I	C21627T
EPI_ISL_452196	21627	C	T	21602	29805	S	T22I	SNP	Spike	S:T22I	C21627T
EPI_ISL_454558	21627	C	T	21627	29903	S	T22I	SNP	Spike	S:T22I	C21627T
EPI_ISL_455118	21627	C	T	21573	29775	S	T22I	SNP	Spike	S:T22I	C21627T
EPI_ISL_473879	21627	C	T	21627	29903	S	T22I	SNP	Spike	S:T22I	C21627T
EPI_ISL_435010	21627	C	T	21627	29903	S	T22I	SNP	Spike	S:T22I	C21627T
EPI_ISL_435011	21627	C	T	21627	29903	S	T22I	SNP	Spike	S:T22I	C21627T
EPI_ISL_418324	21627	C	T	21626	29881	S	T22I	SNP	Spike	S:T22I	C21627T
EPI_ISL_425130	21627	C	T	21627	29903	S	T22I	SNP	Spike	S:T22I	C21627T
EPI_ISL_437512	21627	C	T	21588	29793	S	T22I	SNP	Spike	S:T22I	C21627T
EPI_ISL_442044	21627	C	T	21588	29793	S	T22I	SNP	Spike	S:T22I	C21627T
EPI_ISL_445088	21627	C	T	21555	29761	S	T22I	SNP	Spike	S:T22I	C21627T
EPI_ISL_466072	21627	C	T	21627	29903	S	T22I	SNP	Spike	S:T22I	C21627T
EPI_ISL_437454	21628	T	G	21628	29903	S	T22T	SNP_silent	Spike	S:T22T	T21628G
EPI_ISL_437453	21628	T	G	21628	29903	S	T22T	SNP_silent	Spike	S:T22T	T21628G
EPI_ISL_445131	21629	C	A	21629	29859	S	Q23K	SNP	Spike	S:Q23K	C21629A
EPI_ISL_444246	21632	T	C	21632	29903	S	Q23Q	SNP_silent	Spike	S:Q23Q	T21632C
EPI_ISL_445353	21632	T	A	21605	29815	S	L24I	SNP	Spike	S:L24I	T21632A
EPI_ISL_448282	21632	T	C	21631	29902	S	Q23Q	SNP_silent	Spike	S:Q23Q	T21632C
EPI_ISL_458777	21633	T	C	21579	29782	S	L24S	SNP	Spike	S:L24S	T21633C
EPI_ISL_434155	21635	C	T	21635	29903	S	P25S	SNP	Spike	S:P25S	C21635T
EPI_ISL_436359	21635	C	T	21588	29796	S	P25S	SNP	Spike	S:P25S	C21635T
EPI_ISL_438189	21635	C	T	21635	29903	S	P25S	SNP	Spike	S:P25S	C21635T
EPI_ISL_439785	21635	C	T	21635	29903	S	P25S	SNP	Spike	S:P25S	C21635T
EPI_ISL_439861	21635	C	T	21635	29903	S	P25S	SNP	Spike	S:P25S	C21635T
EPI_ISL_440948	21635	C	T	21635	29903	S	P25S	SNP	Spike	S:P25S	C21635T
EPI_ISL_449443	21635	C	T	21631	29862	S	P25S	SNP	Spike	S:P25S	C21635T
EPI_ISL_453442	21635	C	T	21635	29903	S	P25S	SNP	Spike	S:P25S	C21635T
EPI_ISL_473726	21635	C	T	21581	29773	S	P25S	SNP	Spike	S:P25S	C21635T
EPI_ISL_417443	21636	C	T	21604	29808	S	P25L	SNP	Spike	S:P25L	C21636T
EPI_ISL_456656	21636	C	T	21622	29829	S	P25L	SNP	Spike	S:P25L	C21636T
EPI_ISL_435563	21637	C	T	21637	29840	S	P25P	SNP_silent	Spike	S:P25P	C21637T
EPI_ISL_441502	21637	C	T	21631	29897	S	P25P	SNP_silent	Spike	S:P25P	C21637T
EPI_ISL_441503	21637	C	T	21631	29897	S	P25P	SNP_silent	Spike	S:P25P	C21637T
EPI_ISL_441850	21637	C	T	21631	29897	S	P25P	SNP_silent	Spike	S:P25P	C21637T
EPI_ISL_441863	21637	C	T	21631	29897	S	P25P	SNP_silent	Spike	S:P25P	C21637T
EPI_ISL_441866	21637	C	T	21631	29897	S	P25P	SNP_silent	Spike	S:P25P	C21637T
EPI_ISL_451210	21637	C	T	21637	29840	S	P25P	SNP_silent	Spike	S:P25P	C21637T
EPI_ISL_451259	21637	C	T	21637	29840	S	P25P	SNP_silent	Spike	S:P25P	C21637T
EPI_ISL_457436	21637	C	T	21621	29887	S	P25P	SNP_silent	Spike	S:P25P	C21637T
EPI_ISL_462005	21637	C	T	21637	29903	S	P25P	SNP_silent	Spike	S:P25P	C21637T
EPI_ISL_445869	21637	C	A	21613	29879	S	P25P	SNP_silent	Spike	S:P25P	C21637A
EPI_ISL_436592	21637	C	T	21583	29782	S	P25P	SNP_silent	Spike	S:P25P	C21637T
EPI_ISL_432719	21638	C	T	21638	29903	S	P26S	SNP	Spike	S:P26S	C21638T
EPI_ISL_433737	21638	C	T	21638	29903	S	P26S	SNP	Spike	S:P26S	C21638T
EPI_ISL_437336	21638	C	.	21636	29280	S	P25	deletion_frameshift	Spike	S:P25	C21638.
EPI_ISL_438580	21638	C	T	21638	29903	S	P26S	SNP	Spike	S:P26S	C21638T
EPI_ISL_438673	21638	C	T	21638	29903	S	P26S	SNP	Spike	S:P26S	C21638T
EPI_ISL_447371	21638	C	T	21639	29892	S	P26S	SNP	Spike	S:P26S	C21638T
EPI_ISL_448132	21638	C	T	21638	29903	S	P26S	SNP	Spike	S:P26S	C21638T
EPI_ISL_453052	21638	C	T	21584	29782	S	P26S	SNP	Spike	S:P26S	C21638T
EPI_ISL_454372	21638	C	T	21638	29840	S	P26S	SNP	Spike	S:P26S	C21638T
EPI_ISL_461214	21638	C	T	21584	29775	S	P26S	SNP	Spike	S:P26S	C21638T
EPI_ISL_461217	21638	C	T	21584	29775	S	P26S	SNP	Spike	S:P26S	C21638T
EPI_ISL_461224	21638	C	T	21584	29775	S	P26S	SNP	Spike	S:P26S	C21638T
EPI_ISL_461605	21638	C	T	21638	29903	S	P26S	SNP	Spike	S:P26S	C21638T
EPI_ISL_463291	21638	C	T	21638	29903	S	P26S	SNP	Spike	S:P26S	C21638T
EPI_ISL_468945	21638	C	T	21638	29903	S	P26S	SNP	Spike	S:P26S	C21638T
EPI_ISL_472370	21638	C	T	21600	29865	S	P26S	SNP	Spike	S:P26S	C21638T
EPI_ISL_472381	21638	C	T	21636	29901	S	P26S	SNP	Spike	S:P26S	C21638T
EPI_ISL_472522	21638	C	T	21623	29858	S	P26S	SNP	Spike	S:P26S	C21638T
EPI_ISL_436395	21638	C	T	21592	29790	S	P26S	SNP	Spike	S:P26S	C21638T
EPI_ISL_469412	21639	C	G	21585	29782	S	P26R	SNP	Spike	S:P26R	C21639G
EPI_ISL_469399	21639	C	G	21585	29782	S	P26R	SNP	Spike	S:P26R	C21639G
EPI_ISL_469410	21639	C	G	21585	29782	S	P26R	SNP	Spike	S:P26R	C21639G
EPI_ISL_469445	21639	C	G	21585	29782	S	P26R	SNP	Spike	S:P26R	C21639G
EPI_ISL_469459	21639	C	G	21585	29782	S	P26R	SNP	Spike	S:P26R	C21639G
EPI_ISL_449331	21639	C	T	21639	29903	S	P26L	SNP	Spike	S:P26L	C21639T
EPI_ISL_452509	21639	C	A	21639	29903	S	P26H	SNP	Spike	S:P26H	C21639A
EPI_ISL_465426	21639	C	T	21639	29903	S	P26L	SNP	Spike	S:P26L	C21639T
EPI_ISL_465444	21639	C	T	21639	29903	S	P26L	SNP	Spike	S:P26L	C21639T
EPI_ISL_465477	21639	C	T	21639	29903	S	P26L	SNP	Spike	S:P26L	C21639T
EPI_ISL_465587	21639	C	T	21639	29903	S	P26L	SNP	Spike	S:P26L	C21639T
EPI_ISL_465610	21639	C	T	21639	29903	S	P26L	SNP	Spike	S:P26L	C21639T
EPI_ISL_465658	21639	C	T	21639	29903	S	P26L	SNP	Spike	S:P26L	C21639T
EPI_ISL_472097	21639	C	T	21610	29874	S	P26L	SNP	Spike	S:P26L	C21639T
EPI_ISL_473717	21639	C	T	21585	29782	S	P26L	SNP	Spike	S:P26L	C21639T
EPI_ISL_425267	21639	C	T	21639	29903	S	P26L	SNP	Spike	S:P26L	C21639T
EPI_ISL_433732	21639	C	T	21639	29903	S	P26L	SNP	Spike	S:P26L	C21639T
EPI_ISL_433748	21639	C	T	21639	29903	S	P26L	SNP	Spike	S:P26L	C21639T
EPI_ISL_433784	21639	C	T	21639	29903	S	P26L	SNP	Spike	S:P26L	C21639T
EPI_ISL_442148	21639	C	T	21585	29849	S	P26L	SNP	Spike	S:P26L	C21639T
EPI_ISL_444416	21639	C	T	21639	29903	S	P26L	SNP	Spike	S:P26L	C21639T
EPI_ISL_430970	21641	G	T	21640	29920	S	A27S	SNP	Spike	S:A27S	G21641T
EPI_ISL_465347	21641	G	T	21641	29903	S	A27S	SNP	Spike	S:A27S	G21641T
EPI_ISL_420385	21641	G	A	21587	29782	S	A27T	SNP	Spike	S:A27T	G21641A
EPI_ISL_434850	21641	G	T	21641	29903	S	A27S	SNP	Spike	S:A27S	G21641T
EPI_ISL_434875	21641	G	A	21641	29903	S	A27T	SNP	Spike	S:A27T	G21641A
EPI_ISL_437826	21641	G	T	21632	29906	S	A27S	SNP	Spike	S:A27S	G21641T
EPI_ISL_453520	21641	G	T	21641	29903	S	A27S	SNP	Spike	S:A27S	G21641T
EPI_ISL_458706	21641	G	T	21587	29782	S	A27S	SNP	Spike	S:A27S	G21641T
EPI_ISL_462786	21641	G	T	21587	29782	S	A27S	SNP	Spike	S:A27S	G21641T
EPI_ISL_463916	21641	G	T	21641	29903	S	A27S	SNP	Spike	S:A27S	G21641T
EPI_ISL_463924	21641	G	T	21641	29903	S	A27S	SNP	Spike	S:A27S	G21641T
EPI_ISL_469671	21641	G	T	21587	29782	S	A27S	SNP	Spike	S:A27S	G21641T
EPI_ISL_426059	21641	G	T	21478	29740	S	A27S	SNP	Spike	S:A27S	G21641T
EPI_ISL_425701	21641	G	T	21584	29779	S	A27S	SNP	Spike	S:A27S	G21641T
EPI_ISL_425715	21641	G	T	21584	29779	S	A27S	SNP	Spike	S:A27S	G21641T
EPI_ISL_459526	21641	G	T	21584	29779	S	A27S	SNP	Spike	S:A27S	G21641T
EPI_ISL_459555	21641	G	T	21584	29779	S	A27S	SNP	Spike	S:A27S	G21641T
EPI_ISL_435500	21642	C	T	21642	29903	S	A27V	SNP	Spike	S:A27V	C21642T
EPI_ISL_437381	21642	C	T	21611	29831	S	A27V	SNP	Spike	S:A27V	C21642T
EPI_ISL_444774	21642	C	T	21642	29903	S	A27V	SNP	Spike	S:A27V	C21642T
EPI_ISL_427721	21642	C	T	21378	29412	S	A27V	SNP	Spike	S:A27V	C21642T
EPI_ISL_453986	21642	C	T	21602	29675	S	A27V	SNP	Spike	S:A27V	C21642T
EPI_ISL_419885	21642	C	T	21604	29865	S	A27V	SNP	Spike	S:A27V	C21642T
EPI_ISL_422965	21642	C	T	21611	29864	S	A27V	SNP	Spike	S:A27V	C21642T
EPI_ISL_462420	21642	C	T	21642	29891	S	A27V	SNP	Spike	S:A27V	C21642T
EPI_ISL_426356	21643	A	C	21535	29756	S	A27A	SNP_silent	Spike	S:A27A	A21643C
EPI_ISL_426358	21643	A	C	21535	29756	S	A27A	SNP_silent	Spike	S:A27A	A21643C
EPI_ISL_442622	21643	A	G	21589	29782	S	A27A	SNP_silent	Spike	S:A27A	A21643G
EPI_ISL_443103	21643	A	G	21634	29857	S	A27A	SNP_silent	Spike	S:A27A	A21643G
EPI_ISL_443646	21643	A	G	21589	29849	S	A27A	SNP_silent	Spike	S:A27A	A21643G
EPI_ISL_457524	21643	A	G	21613	29873	S	A27A	SNP_silent	Spike	S:A27A	A21643G
EPI_ISL_457556	21643	A	G	21641	29901	S	A27A	SNP_silent	Spike	S:A27A	A21643G
EPI_ISL_470250	21643	A	G	21589	29782	S	A27A	SNP_silent	Spike	S:A27A	A21643G
EPI_ISL_408487	21644	T	G	21645	29892	S	Y28D	SNP	Spike	S:Y28D	T21644G
EPI_ISL_470423	21644	T	C	21590	29782	S	Y28H	SNP	Spike	S:Y28H	T21644C
EPI_ISL_459113	21644	T	C	21587	29779	S	Y28H	SNP	Spike	S:Y28H	T21644C
EPI_ISL_461653	21644	T	C	21587	29779	S	Y28H	SNP	Spike	S:Y28H	T21644C
EPI_ISL_473560	21644	T	C	21587	29779	S	Y28H	SNP	Spike	S:Y28H	T21644C
EPI_ISL_473633	21644	T	C	21641	29900	S	Y28H	SNP	Spike	S:Y28H	T21644C
EPI_ISL_435138	21644	T	C	21644	29903	S	Y28H	SNP	Spike	S:Y28H	T21644C
EPI_ISL_418799	21644	T	C	21605	29831	S	Y28H	SNP	Spike	S:Y28H	T21644C
EPI_ISL_431101	21644	T	C	21644	29903	S	Y28H	SNP	Spike	S:Y28H	T21644C
EPI_ISL_408487	21646	C	T	21647	29892	S	Y28Y	SNP_silent	Spike	S:Y28Y	C21646T
EPI_ISL_420723	21646	C	T	21646	29903	S	Y28Y	SNP_silent	Spike	S:Y28Y	C21646T
EPI_ISL_434094	21646	C	T	21646	29903	S	Y28Y	SNP_silent	Spike	S:Y28Y	C21646T
EPI_ISL_440673	21646	C	T	21592	29808	S	Y28Y	SNP_silent	Spike	S:Y28Y	C21646T
EPI_ISL_443086	21646	C	T	21592	29782	S	Y28Y	SNP_silent	Spike	S:Y28Y	C21646T
EPI_ISL_451902	21646	C	T	21646	29903	S	Y28Y	SNP_silent	Spike	S:Y28Y	C21646T
EPI_ISL_455754	21646	C	T	21646	29684	S	Y28Y	SNP_silent	Spike	S:Y28Y	C21646T
EPI_ISL_455765	21646	C	T	21646	29688	S	Y28Y	SNP_silent	Spike	S:Y28Y	C21646T
EPI_ISL_461215	21646	C	T	21592	29775	S	Y28Y	SNP_silent	Spike	S:Y28Y	C21646T
EPI_ISL_461216	21646	C	T	21592	29775	S	Y28Y	SNP_silent	Spike	S:Y28Y	C21646T
EPI_ISL_461222	21646	C	T	21592	29775	S	Y28Y	SNP_silent	Spike	S:Y28Y	C21646T
EPI_ISL_461272	21646	C	T	21592	29775	S	Y28Y	SNP_silent	Spike	S:Y28Y	C21646T
EPI_ISL_461311	21646	C	T	21592	29775	S	Y28Y	SNP_silent	Spike	S:Y28Y	C21646T
EPI_ISL_462211	21646	C	T	21592	29782	S	Y28Y	SNP_silent	Spike	S:Y28Y	C21646T
EPI_ISL_464065	21646	C	T	21592	29782	S	Y28Y	SNP_silent	Spike	S:Y28Y	C21646T
EPI_ISL_468216	21646	C	T	21646	29903	S	Y28Y	SNP_silent	Spike	S:Y28Y	C21646T
EPI_ISL_468237	21646	C	T	21646	29903	S	Y28Y	SNP_silent	Spike	S:Y28Y	C21646T
EPI_ISL_468259	21646	C	T	21646	29903	S	Y28Y	SNP_silent	Spike	S:Y28Y	C21646T
EPI_ISL_454525	21646	C	T	21646	29903	S	Y28Y	SNP_silent	Spike	S:Y28Y	C21646T
EPI_ISL_438813	21646	C	T	21589	29779	S	Y28Y	SNP_silent	Spike	S:Y28Y	C21646T
EPI_ISL_463067	21646	C	T	21646	29750	S	Y28Y	SNP_silent	Spike	S:Y28Y	C21646T
EPI_ISL_416447	21646	C	T	21595	29813	S	Y28Y	SNP_silent	Spike	S:Y28Y	C21646T
EPI_ISL_418055	21646	C	T	21394	29599	S	Y28Y	SNP_silent	Spike	S:Y28Y	C21646T
EPI_ISL_451947	21646	C	T	21646	29903	S	Y28Y	SNP_silent	Spike	S:Y28Y	C21646T
EPI_ISL_466895	21646	C	T	21646	29903	S	Y28Y	SNP_silent	Spike	S:Y28Y	C21646T
EPI_ISL_408487	21647	.	T	21649	29892	S	Y28	insertion_frameshift	Spike	S:Y28	.21647T
EPI_ISL_470012	21647	A	G	21593	29782	S	T29A	SNP	Spike	S:T29A	A21647G
EPI_ISL_448372	21648	C	T	21646	29901	S	T29I	SNP	Spike	S:T29I	C21648T
EPI_ISL_419951	21648	C	T	21646	29901	S	T29I	SNP	Spike	S:T29I	C21648T
EPI_ISL_422698	21648	C	T	21594	29775	S	T29I	SNP	Spike	S:T29I	C21648T
EPI_ISL_422699	21648	C	T	21594	29775	S	T29I	SNP	Spike	S:T29I	C21648T
EPI_ISL_423588	21648	C	T	21648	29903	S	T29I	SNP	Spike	S:T29I	C21648T
EPI_ISL_426485	21648	C	T	21645	29879	S	T29I	SNP	Spike	S:T29I	C21648T
EPI_ISL_426541	21648	C	T	21648	29882	S	T29I	SNP	Spike	S:T29I	C21648T
EPI_ISL_426756	21648	C	T	21648	29903	S	T29I	SNP	Spike	S:T29I	C21648T
EPI_ISL_426805	21648	C	T	21648	29903	S	T29I	SNP	Spike	S:T29I	C21648T
EPI_ISL_426928	21648	C	T	21648	29903	S	T29I	SNP	Spike	S:T29I	C21648T
EPI_ISL_426991	21648	C	T	21648	29903	S	T29I	SNP	Spike	S:T29I	C21648T
EPI_ISL_427073	21648	C	T	21648	29903	S	T29I	SNP	Spike	S:T29I	C21648T
EPI_ISL_430564	21648	C	T	21648	29903	S	T29I	SNP	Spike	S:T29I	C21648T
EPI_ISL_434753	21648	C	T	21648	29903	S	T29I	SNP	Spike	S:T29I	C21648T
EPI_ISL_438618	21648	C	T	21648	29903	S	T29I	SNP	Spike	S:T29I	C21648T
EPI_ISL_438652	21648	C	T	21648	29903	S	T29I	SNP	Spike	S:T29I	C21648T
EPI_ISL_441766	21648	C	T	21594	29782	S	T29I	SNP	Spike	S:T29I	C21648T
EPI_ISL_447986	21648	C	T	21648	29903	S	T29I	SNP	Spike	S:T29I	C21648T
EPI_ISL_448306	21648	C	T	21644	29899	S	T29I	SNP	Spike	S:T29I	C21648T
EPI_ISL_448313	21648	C	T	21618	29873	S	T29I	SNP	Spike	S:T29I	C21648T
EPI_ISL_448316	21648	C	T	21648	29903	S	T29I	SNP	Spike	S:T29I	C21648T
EPI_ISL_448345	21648	C	T	21643	29898	S	T29I	SNP	Spike	S:T29I	C21648T
EPI_ISL_448348	21648	C	T	21647	29902	S	T29I	SNP	Spike	S:T29I	C21648T
EPI_ISL_448379	21648	C	T	21610	29865	S	T29I	SNP	Spike	S:T29I	C21648T
EPI_ISL_448381	21648	C	T	21618	29873	S	T29I	SNP	Spike	S:T29I	C21648T
EPI_ISL_448386	21648	C	T	21610	29865	S	T29I	SNP	Spike	S:T29I	C21648T
EPI_ISL_448388	21648	C	T	21610	29865	S	T29I	SNP	Spike	S:T29I	C21648T
EPI_ISL_448994	21648	C	T	21644	29899	S	T29I	SNP	Spike	S:T29I	C21648T
EPI_ISL_449038	21648	C	T	21610	29865	S	T29I	SNP	Spike	S:T29I	C21648T
EPI_ISL_449090	21648	C	T	21642	29897	S	T29I	SNP	Spike	S:T29I	C21648T
EPI_ISL_449104	21648	C	T	21644	29899	S	T29I	SNP	Spike	S:T29I	C21648T
EPI_ISL_449108	21648	C	T	21618	29873	S	T29I	SNP	Spike	S:T29I	C21648T
EPI_ISL_449156	21648	C	T	21648	29903	S	T29I	SNP	Spike	S:T29I	C21648T
EPI_ISL_451913	21648	C	T	21648	29903	S	T29I	SNP	Spike	S:T29I	C21648T
EPI_ISL_453548	21648	C	T	21645	29900	S	T29I	SNP	Spike	S:T29I	C21648T
EPI_ISL_453567	21648	C	T	21611	29866	S	T29I	SNP	Spike	S:T29I	C21648T
EPI_ISL_453571	21648	C	T	21642	29897	S	T29I	SNP	Spike	S:T29I	C21648T
EPI_ISL_453573	21648	C	T	21641	29896	S	T29I	SNP	Spike	S:T29I	C21648T
EPI_ISL_453604	21648	C	T	21631	29886	S	T29I	SNP	Spike	S:T29I	C21648T
EPI_ISL_453605	21648	C	T	21610	29865	S	T29I	SNP	Spike	S:T29I	C21648T
EPI_ISL_453607	21648	C	T	21610	29865	S	T29I	SNP	Spike	S:T29I	C21648T
EPI_ISL_457343	21648	C	T	21612	29867	S	T29I	SNP	Spike	S:T29I	C21648T
EPI_ISL_457353	21648	C	T	21618	29873	S	T29I	SNP	Spike	S:T29I	C21648T
EPI_ISL_457375	21648	C	T	21610	29865	S	T29I	SNP	Spike	S:T29I	C21648T
EPI_ISL_457382	21648	C	T	21644	29899	S	T29I	SNP	Spike	S:T29I	C21648T
EPI_ISL_457386	21648	C	T	21610	29865	S	T29I	SNP	Spike	S:T29I	C21648T
EPI_ISL_457472	21648	C	T	21618	29873	S	T29I	SNP	Spike	S:T29I	C21648T
EPI_ISL_457511	21648	C	T	21647	29902	S	T29I	SNP	Spike	S:T29I	C21648T
EPI_ISL_461805	21648	C	T	21636	29891	S	T29I	SNP	Spike	S:T29I	C21648T
EPI_ISL_461811	21648	C	T	21644	29899	S	T29I	SNP	Spike	S:T29I	C21648T
EPI_ISL_461817	21648	C	T	21642	29897	S	T29I	SNP	Spike	S:T29I	C21648T
EPI_ISL_461818	21648	C	T	21612	29867	S	T29I	SNP	Spike	S:T29I	C21648T
EPI_ISL_461822	21648	C	T	21647	29902	S	T29I	SNP	Spike	S:T29I	C21648T
EPI_ISL_461827	21648	C	T	21642	29897	S	T29I	SNP	Spike	S:T29I	C21648T
EPI_ISL_461885	21648	C	T	21648	29903	S	T29I	SNP	Spike	S:T29I	C21648T
EPI_ISL_463004	21648	C	T	21609	29786	S	T29I	SNP	Spike	S:T29I	C21648T
EPI_ISL_472306	21648	C	T	21648	29900	S	T29I	SNP	Spike	S:T29I	C21648T
EPI_ISL_418869	21648	C	T	21548	29794	S	T29I	SNP	Spike	S:T29I	C21648T
EPI_ISL_421286	21648	C	T	21594	29782	S	T29I	SNP	Spike	S:T29I	C21648T
EPI_ISL_428341	21648	C	T	21594	29782	S	T29I	SNP	Spike	S:T29I	C21648T
EPI_ISL_444530	21648	C	T	21648	29903	S	T29I	SNP	Spike	S:T29I	C21648T
EPI_ISL_444561	21648	C	T	21648	29903	S	T29I	SNP	Spike	S:T29I	C21648T
EPI_ISL_444565	21648	C	T	21648	29903	S	T29I	SNP	Spike	S:T29I	C21648T
EPI_ISL_444602	21648	C	T	21648	29903	S	T29I	SNP	Spike	S:T29I	C21648T
EPI_ISL_444603	21648	C	T	21648	29903	S	T29I	SNP	Spike	S:T29I	C21648T
EPI_ISL_444604	21648	C	T	21648	29903	S	T29I	SNP	Spike	S:T29I	C21648T
EPI_ISL_444828	21648	C	T	21645	29900	S	T29I	SNP	Spike	S:T29I	C21648T
EPI_ISL_468686	21648	C	T	21648	29903	S	T29I	SNP	Spike	S:T29I	C21648T
EPI_ISL_468692	21648	C	T	21648	29903	S	T29I	SNP	Spike	S:T29I	C21648T
EPI_ISL_469209	21648	C	T	21648	29903	S	T29I	SNP	Spike	S:T29I	C21648T
EPI_ISL_469210	21648	C	T	21648	29903	S	T29I	SNP	Spike	S:T29I	C21648T
EPI_ISL_434067	21648	C	T	21648	29903	S	T29I	SNP	Spike	S:T29I	C21648T
EPI_ISL_433456	21648	C	T	21648	29903	S	T29I	SNP	Spike	S:T29I	C21648T
EPI_ISL_465905	21653	T	C	21653	29903	S	S31P	SNP	Spike	S:S31P	T21653C
EPI_ISL_468408	21654	C	T	21616	29865	S	S31F	SNP	Spike	S:S31F	C21654T
EPI_ISL_460123	21656	T	C	21639	29856	S	F32L	SNP	Spike	S:F32L	T21656C
EPI_ISL_412900	21656	T	G	20998	29201	S	F32V	SNP	Spike	S:F32V	T21656G
EPI_ISL_402132	21656	T	A	21645	29848	S	F32I	SNP	Spike	S:F32I	T21656A
EPI_ISL_455322	21657	T	A	21657	29903	S	F32Y	SNP	Spike	S:F32Y	T21657A
EPI_ISL_434019	21658	C	T	21658	29903	S	F32F	SNP_silent	Spike	S:F32F	C21658T
EPI_ISL_455275	21658	C	T	21604	29775	S	F32F	SNP_silent	Spike	S:F32F	C21658T
EPI_ISL_460226	21658	C	T	21639	29859	S	F32F	SNP_silent	Spike	S:F32F	C21658T
EPI_ISL_460305	21658	C	G	21630	29834	S	F32L	SNP	Spike	S:F32L	C21658G
EPI_ISL_460420	21658	C	G	21652	29875	S	F32L	SNP	Spike	S:F32L	C21658G
EPI_ISL_461648	21658	C	T	21604	29782	S	F32F	SNP_silent	Spike	S:F32F	C21658T
EPI_ISL_462845	21658	C	T	21623	29820	S	F32F	SNP_silent	Spike	S:F32F	C21658T
EPI_ISL_465508	21658	C	T	21658	29903	S	F32F	SNP_silent	Spike	S:F32F	C21658T
EPI_ISL_427133	21658	C	T	21658	29903	S	F32F	SNP_silent	Spike	S:F32F	C21658T
EPI_ISL_427134	21658	C	T	21658	29903	S	F32F	SNP_silent	Spike	S:F32F	C21658T
EPI_ISL_430680	21658	C	T	21658	29903	S	F32F	SNP_silent	Spike	S:F32F	C21658T
EPI_ISL_430681	21658	C	T	21658	29903	S	F32F	SNP_silent	Spike	S:F32F	C21658T
EPI_ISL_430682	21658	C	T	21658	29903	S	F32F	SNP_silent	Spike	S:F32F	C21658T
EPI_ISL_430683	21658	C	T	21658	29903	S	F32F	SNP_silent	Spike	S:F32F	C21658T
EPI_ISL_430684	21658	C	T	21658	29903	S	F32F	SNP_silent	Spike	S:F32F	C21658T
EPI_ISL_430717	21658	C	T	21658	29903	S	F32F	SNP_silent	Spike	S:F32F	C21658T
EPI_ISL_414008	21658	C	T	21658	29903	S	F32F	SNP_silent	Spike	S:F32F	C21658T
EPI_ISL_464199	21658	C	T	21658	29903	S	F32F	SNP_silent	Spike	S:F32F	C21658T
EPI_ISL_464210	21658	C	T	21658	29903	S	F32F	SNP_silent	Spike	S:F32F	C21658T
EPI_ISL_464211	21658	C	T	21658	29903	S	F32F	SNP_silent	Spike	S:F32F	C21658T
EPI_ISL_464250	21658	C	T	21658	29903	S	F32F	SNP_silent	Spike	S:F32F	C21658T
EPI_ISL_464255	21658	C	T	21658	29902	S	F32F	SNP_silent	Spike	S:F32F	C21658T
EPI_ISL_464263	21658	C	T	21658	29903	S	F32F	SNP_silent	Spike	S:F32F	C21658T
EPI_ISL_464297	21658	C	T	21658	29903	S	F32F	SNP_silent	Spike	S:F32F	C21658T
EPI_ISL_464301	21658	C	T	21658	29903	S	F32F	SNP_silent	Spike	S:F32F	C21658T
EPI_ISL_464389	21658	C	T	21658	29903	S	F32F	SNP_silent	Spike	S:F32F	C21658T
EPI_ISL_464421	21658	C	T	21658	29903	S	F32F	SNP_silent	Spike	S:F32F	C21658T
EPI_ISL_464512	21658	C	T	21658	29903	S	F32F	SNP_silent	Spike	S:F32F	C21658T
EPI_ISL_439605	21658	C	G	21604	29782	S	F32L	SNP	Spike	S:F32L	C21658G
EPI_ISL_468958	21659	A	T	21659	29903	S	T33S	SNP	Spike	S:T33S	A21659T
EPI_ISL_468975	21659	A	T	21659	29903	S	T33S	SNP	Spike	S:T33S	A21659T
EPI_ISL_452072	21664	TGGTGTTTATTACCCTGACAAAGTTTTCAGATCCTC	.	21663	29841	S	G35	deletion	Spike	S:G35	TGGTGTTTATTACCCTGACAAAGTTTTCAGATCCTC21664.
EPI_ISL_440947	21670	T	G	21670	29903	S	V36V	SNP_silent	Spike	S:V36V	T21670G
EPI_ISL_472845	21670	T	G	21670	29903	S	V36V	SNP_silent	Spike	S:V36V	T21670G
EPI_ISL_432716	21673	T	C	21673	29903	S	Y37Y	SNP_silent	Spike	S:Y37Y	T21673C
EPI_ISL_463901	21676	C	T	21658	29855	S	Y38Y	SNP_silent	Spike	S:Y38Y	C21676T
EPI_ISL_418984	21676	C	T	21622	29782	S	Y38Y	SNP_silent	Spike	S:Y38Y	C21676T
EPI_ISL_420326	21676	C	T	21622	29782	S	Y38Y	SNP_silent	Spike	S:Y38Y	C21676T
EPI_ISL_420355	21676	C	T	21622	29782	S	Y38Y	SNP_silent	Spike	S:Y38Y	C21676T
EPI_ISL_432758	21676	C	T	21676	29903	S	Y38Y	SNP_silent	Spike	S:Y38Y	C21676T
EPI_ISL_458230	21676	C	T	21622	29782	S	Y38Y	SNP_silent	Spike	S:Y38Y	C21676T
EPI_ISL_471788	21676	C	T	21676	29903	S	Y38Y	SNP_silent	Spike	S:Y38Y	C21676T
EPI_ISL_463902	21676	C	T	21650	29845	S	Y38Y	SNP_silent	Spike	S:Y38Y	C21676T
EPI_ISL_418725	21676	C	T	21679	29906	S	Y38Y	SNP_silent	Spike	S:Y38Y	C21676T
EPI_ISL_452930	21679	T	A	21679	29903	S	P39P	SNP_silent	Spike	S:P39P	T21679A
EPI_ISL_463445	21679	T	C	21679	29903	S	P39P	SNP_silent	Spike	S:P39P	T21679C
EPI_ISL_469671	21682	C	T	21628	29782	S	D40D	SNP_silent	Spike	S:D40D	C21682T
EPI_ISL_473796	21682	C	T	21682	29903	S	D40D	SNP_silent	Spike	S:D40D	C21682T
EPI_ISL_453090	21688	T	C	21634	29782	S	V42V	SNP_silent	Spike	S:V42V	T21688C
EPI_ISL_434034	21691	C	T	21691	29903	S	F43F	SNP_silent	Spike	S:F43F	C21691T
EPI_ISL_438649	21691	C	T	21691	29903	S	F43F	SNP_silent	Spike	S:F43F	C21691T
EPI_ISL_438681	21691	C	T	21691	29903	S	F43F	SNP_silent	Spike	S:F43F	C21691T
EPI_ISL_438697	21691	C	T	21691	29903	S	F43F	SNP_silent	Spike	S:F43F	C21691T
EPI_ISL_438701	21691	C	T	21691	29903	S	F43F	SNP_silent	Spike	S:F43F	C21691T
EPI_ISL_444323	21691	C	T	21691	29903	S	F43F	SNP_silent	Spike	S:F43F	C21691T
EPI_ISL_444428	21691	C	T	21691	29903	S	F43F	SNP_silent	Spike	S:F43F	C21691T
EPI_ISL_446099	21691	C	T	21689	29901	S	F43F	SNP_silent	Spike	S:F43F	C21691T
EPI_ISL_446765	21691	C	T	21683	29895	S	F43F	SNP_silent	Spike	S:F43F	C21691T
EPI_ISL_446836	21691	C	T	21654	29866	S	F43F	SNP_silent	Spike	S:F43F	C21691T
EPI_ISL_446864	21691	C	T	21653	29865	S	F43F	SNP_silent	Spike	S:F43F	C21691T
EPI_ISL_446875	21691	C	T	21653	29865	S	F43F	SNP_silent	Spike	S:F43F	C21691T
EPI_ISL_447769	21691	C	T	21629	29719	S	F43F	SNP_silent	Spike	S:F43F	C21691T
EPI_ISL_448489	21691	C	T	21691	29903	S	F43F	SNP_silent	Spike	S:F43F	C21691T
EPI_ISL_451810	21691	C	T	21691	29903	S	F43F	SNP_silent	Spike	S:F43F	C21691T
EPI_ISL_454828	21691	C	T	21666	29834	S	F43F	SNP_silent	Spike	S:F43F	C21691T
EPI_ISL_460802	21691	C	T	21637	29775	S	F43F	SNP_silent	Spike	S:F43F	C21691T
EPI_ISL_462083	21691	C	T	21691	29903	S	F43F	SNP_silent	Spike	S:F43F	C21691T
EPI_ISL_468270	21691	C	T	21691	29903	S	F43F	SNP_silent	Spike	S:F43F	C21691T
EPI_ISL_472731	21691	C	T	21671	29883	S	F43F	SNP_silent	Spike	S:F43F	C21691T
EPI_ISL_474079	21691	C	T	21656	29868	S	F43F	SNP_silent	Spike	S:F43F	C21691T
EPI_ISL_474186	21691	C	T	21685	29897	S	F43F	SNP_silent	Spike	S:F43F	C21691T
EPI_ISL_474775	21691	C	T	21653	29865	S	F43F	SNP_silent	Spike	S:F43F	C21691T
EPI_ISL_419679	21691	C	T	21637	29782	S	F43F	SNP_silent	Spike	S:F43F	C21691T
EPI_ISL_433532	21694	A	G	21640	29811	S	R44R	SNP_silent	Spike	S:R44R	A21694G
EPI_ISL_427299	21694	A	G	21664	29748	S	R44R	SNP_silent	Spike	S:R44R	A21694G
EPI_ISL_444990	21694	A	G	21667	29876	S	R44R	SNP_silent	Spike	S:R44R	A21694G
EPI_ISL_454225	21694	A	G	21654	29763	S	R44R	SNP_silent	Spike	S:R44R	A21694G
EPI_ISL_457570	21695	T	C	21694	29902	S	S45P	SNP	Spike	S:S45P	T21695C
EPI_ISL_428793	21697	C	A	21697	29903	S	S45S	SNP_silent	Spike	S:S45S	C21697A
EPI_ISL_430374	21697	C	A	21697	29903	S	S45S	SNP_silent	Spike	S:S45S	C21697A
EPI_ISL_435404	21697	C	A	21697	29903	S	S45S	SNP_silent	Spike	S:S45S	C21697A
EPI_ISL_437252	21697	C	A	21697	29903	S	S45S	SNP_silent	Spike	S:S45S	C21697A
EPI_ISL_461011	21697	C	A	21643	29775	S	S45S	SNP_silent	Spike	S:S45S	C21697A
EPI_ISL_420114	21697	C	T	21668	29838	S	S45S	SNP_silent	Spike	S:S45S	C21697T
EPI_ISL_425182	21697	C	T	21643	29782	S	S45S	SNP_silent	Spike	S:S45S	C21697T
EPI_ISL_425183	21697	C	T	21643	29782	S	S45S	SNP_silent	Spike	S:S45S	C21697T
EPI_ISL_425194	21697	C	T	21643	29782	S	S45S	SNP_silent	Spike	S:S45S	C21697T
EPI_ISL_425195	21697	C	T	21643	29782	S	S45S	SNP_silent	Spike	S:S45S	C21697T
EPI_ISL_425198	21697	C	T	21643	29782	S	S45S	SNP_silent	Spike	S:S45S	C21697T
EPI_ISL_436401	21697	C	T	21659	29798	S	S45S	SNP_silent	Spike	S:S45S	C21697T
EPI_ISL_444573	21698	T	G	21698	29903	S	S46A	SNP	Spike	S:S46A	T21698G
EPI_ISL_444555	21698	T	G	21698	29903	S	S46A	SNP	Spike	S:S46A	T21698G
EPI_ISL_444577	21698	T	G	21698	29903	S	S46A	SNP	Spike	S:S46A	T21698G
EPI_ISL_444585	21698	T	G	21698	29903	S	S46A	SNP	Spike	S:S46A	T21698G
EPI_ISL_444590	21698	T	G	21698	29903	S	S46A	SNP	Spike	S:S46A	T21698G
EPI_ISL_444838	21699	C	T	21699	29903	S	S46L	SNP	Spike	S:S46L	C21699T
EPI_ISL_470582	21699	C	T	21645	29782	S	S46L	SNP	Spike	S:S46L	C21699T
EPI_ISL_433934	21700	A	T	21700	29903	S	S46S	SNP_silent	Spike	S:S46S	A21700T
EPI_ISL_441599	21700	A	T	21646	29849	S	S46S	SNP_silent	Spike	S:S46S	A21700T
EPI_ISL_452072	21701	GTT	.	21664	29841	S	V47	deletion	Spike	S:V47	GTT21701.
EPI_ISL_457393	21701	G	T	21682	29884	S	V47F	SNP	Spike	S:V47F	G21701T
EPI_ISL_463061	21703	T	G	21703	29685	S	V47V	SNP_silent	Spike	S:V47V	T21703G
EPI_ISL_463060	21703	T	G	21703	29729	S	V47V	SNP_silent	Spike	S:V47V	T21703G
EPI_ISL_463062	21703	T	G	21703	29392	S	V47V	SNP_silent	Spike	S:V47V	T21703G
EPI_ISL_461087	21706	A	G	21649	29772	S	L48L	SNP_silent	Spike	S:L48L	A21706G
EPI_ISL_423758	21706	A	C	21706	29903	S	L48F	SNP	Spike	S:L48F	A21706C
EPI_ISL_416321	21707	C	T	21676	29835	S	H49Y	SNP	Spike	S:H49Y	C21707T
EPI_ISL_426898	21707	C	T	21707	29903	S	H49Y	SNP	Spike	S:H49Y	C21707T
EPI_ISL_430050	21707	C	T	21703	29899	S	H49Y	SNP	Spike	S:H49Y	C21707T
EPI_ISL_430632	21707	C	T	21707	29903	S	H49Y	SNP	Spike	S:H49Y	C21707T
EPI_ISL_430633	21707	C	T	21707	29903	S	H49Y	SNP	Spike	S:H49Y	C21707T
EPI_ISL_433757	21707	C	T	21707	29903	S	H49Y	SNP	Spike	S:H49Y	C21707T
EPI_ISL_438506	21707	C	T	21653	29782	S	H49Y	SNP	Spike	S:H49Y	C21707T
EPI_ISL_439514	21707	C	T	21653	29782	S	H49Y	SNP	Spike	S:H49Y	C21707T
EPI_ISL_441295	21707	C	T	21653	29849	S	H49Y	SNP	Spike	S:H49Y	C21707T
EPI_ISL_450751	21707	C	T	21672	29818	S	H49Y	SNP	Spike	S:H49Y	C21707T
EPI_ISL_452059	21707	C	T	21707	29903	S	H49Y	SNP	Spike	S:H49Y	C21707T
EPI_ISL_452061	21707	C	T	21707	29903	S	H49Y	SNP	Spike	S:H49Y	C21707T
EPI_ISL_452063	21707	C	T	21707	29903	S	H49Y	SNP	Spike	S:H49Y	C21707T
EPI_ISL_452064	21707	C	T	21707	29903	S	H49Y	SNP	Spike	S:H49Y	C21707T
EPI_ISL_452067	21707	C	T	21707	29903	S	H49Y	SNP	Spike	S:H49Y	C21707T
EPI_ISL_452068	21707	C	T	21707	29903	S	H49Y	SNP	Spike	S:H49Y	C21707T
EPI_ISL_452069	21707	C	T	21707	29903	S	H49Y	SNP	Spike	S:H49Y	C21707T
EPI_ISL_452071	21707	C	T	21707	29903	S	H49Y	SNP	Spike	S:H49Y	C21707T
EPI_ISL_452076	21707	C	T	21707	29903	S	H49Y	SNP	Spike	S:H49Y	C21707T
EPI_ISL_452078	21707	C	T	21707	29903	S	H49Y	SNP	Spike	S:H49Y	C21707T
EPI_ISL_452086	21707	C	T	21707	29903	S	H49Y	SNP	Spike	S:H49Y	C21707T
EPI_ISL_452087	21707	C	T	21707	29903	S	H49Y	SNP	Spike	S:H49Y	C21707T
EPI_ISL_452091	21707	C	T	21707	29903	S	H49Y	SNP	Spike	S:H49Y	C21707T
EPI_ISL_453965	21707	C	T	21667	29763	S	H49Y	SNP	Spike	S:H49Y	C21707T
EPI_ISL_454109	21707	C	T	21667	29763	S	H49Y	SNP	Spike	S:H49Y	C21707T
EPI_ISL_454727	21707	C	T	21707	29903	S	H49Y	SNP	Spike	S:H49Y	C21707T
EPI_ISL_455661	21707	C	T	21707	29903	S	H49Y	SNP	Spike	S:H49Y	C21707T
EPI_ISL_461768	21707	C	T	21707	29903	S	H49Y	SNP	Spike	S:H49Y	C21707T
EPI_ISL_462438	21707	C	T	21653	29782	S	H49Y	SNP	Spike	S:H49Y	C21707T
EPI_ISL_465262	21707	C	T	21707	29903	S	H49Y	SNP	Spike	S:H49Y	C21707T
EPI_ISL_465263	21707	C	T	21707	29903	S	H49Y	SNP	Spike	S:H49Y	C21707T
EPI_ISL_466649	21707	C	T	21707	29883	S	H49Y	SNP	Spike	S:H49Y	C21707T
EPI_ISL_468003	21707	C	T	21671	29867	S	H49Y	SNP	Spike	S:H49Y	C21707T
EPI_ISL_470382	21707	C	T	21653	29782	S	H49Y	SNP	Spike	S:H49Y	C21707T
EPI_ISL_472629	21707	C	T	21672	29868	S	H49Y	SNP	Spike	S:H49Y	C21707T
EPI_ISL_455408	21707	C	T	21673	29869	S	H49Y	SNP	Spike	S:H49Y	C21707T
EPI_ISL_441421	21707	C	T	21694	29890	S	H49Y	SNP	Spike	S:H49Y	C21707T
EPI_ISL_408010	21707	C	T	21707	29882	S	H49Y	SNP	Spike	S:H49Y	C21707T
EPI_ISL_452383	21707	C	T	21707	29903	S	H49Y	SNP	Spike	S:H49Y	C21707T
EPI_ISL_432818	21707	C	T	21707	29903	S	H49Y	SNP	Spike	S:H49Y	C21707T
EPI_ISL_450526	21707	C	T	21669	29762	S	H49Y	SNP	Spike	S:H49Y	C21707T
EPI_ISL_450528	21707	C	T	21669	29762	S	H49Y	SNP	Spike	S:H49Y	C21707T
EPI_ISL_411952	21707	C	T	21707	29891	S	H49Y	SNP	Spike	S:H49Y	C21707T
EPI_ISL_421258	21707	C	T	21683	29867	S	H49Y	SNP	Spike	S:H49Y	C21707T
EPI_ISL_417518	21707	C	T	21707	29521	S	H49Y	SNP	Spike	S:H49Y	C21707T
EPI_ISL_424627	21707	C	T	21707	29872	S	H49Y	SNP	Spike	S:H49Y	C21707T
EPI_ISL_426361	21707	C	T	21707	29873	S	H49Y	SNP	Spike	S:H49Y	C21707T
EPI_ISL_426363	21707	C	T	21707	29875	S	H49Y	SNP	Spike	S:H49Y	C21707T
EPI_ISL_426364	21707	C	T	21707	29875	S	H49Y	SNP	Spike	S:H49Y	C21707T
EPI_ISL_450721	21707	C	T	21653	29782	S	H49Y	SNP	Spike	S:H49Y	C21707T
EPI_ISL_455439	21707	C	T	21703	29854	S	H49Y	SNP	Spike	S:H49Y	C21707T
EPI_ISL_454950	21707	C	T	21707	29903	S	H49Y	SNP	Spike	S:H49Y	C21707T
EPI_ISL_429101	21707	C	T	21707	29891	S	H49Y	SNP	Spike	S:H49Y	C21707T
EPI_ISL_403936	21707	C	T	21696	29845	S	H49Y	SNP	Spike	S:H49Y	C21707T
EPI_ISL_403937	21707	C	T	21696	29845	S	H49Y	SNP	Spike	S:H49Y	C21707T
EPI_ISL_406531	21707	C	T	21684	29808	S	H49Y	SNP	Spike	S:H49Y	C21707T
EPI_ISL_421257	21707	C	T	21683	29867	S	H49Y	SNP	Spike	S:H49Y	C21707T
EPI_ISL_428440	21707	C	T	21707	29866	S	H49Y	SNP	Spike	S:H49Y	C21707T
EPI_ISL_429074	21707	C	T	21707	29891	S	H49Y	SNP	Spike	S:H49Y	C21707T
EPI_ISL_429076	21707	C	T	21707	29891	S	H49Y	SNP	Spike	S:H49Y	C21707T
EPI_ISL_429077	21707	C	T	21707	29891	S	H49Y	SNP	Spike	S:H49Y	C21707T
EPI_ISL_429078	21707	C	T	21707	29903	S	H49Y	SNP	Spike	S:H49Y	C21707T
EPI_ISL_429085	21707	C	T	21707	29891	S	H49Y	SNP	Spike	S:H49Y	C21707T
EPI_ISL_429086	21707	C	T	21707	29903	S	H49Y	SNP	Spike	S:H49Y	C21707T
EPI_ISL_429088	21707	C	T	21707	29891	S	H49Y	SNP	Spike	S:H49Y	C21707T
EPI_ISL_429096	21707	C	T	21707	29891	S	H49Y	SNP	Spike	S:H49Y	C21707T
EPI_ISL_429097	21707	C	T	21707	29891	S	H49Y	SNP	Spike	S:H49Y	C21707T
EPI_ISL_429098	21707	C	T	21707	29891	S	H49Y	SNP	Spike	S:H49Y	C21707T
EPI_ISL_429100	21707	C	T	21707	29891	S	H49Y	SNP	Spike	S:H49Y	C21707T
EPI_ISL_429102	21707	C	T	21707	29891	S	H49Y	SNP	Spike	S:H49Y	C21707T
EPI_ISL_429104	21707	C	T	21707	29903	S	H49Y	SNP	Spike	S:H49Y	C21707T
EPI_ISL_429105	21707	C	T	21707	29903	S	H49Y	SNP	Spike	S:H49Y	C21707T
EPI_ISL_454976	21707	C	T	21707	29903	S	H49Y	SNP	Spike	S:H49Y	C21707T
EPI_ISL_462293	21707	C	T	21707	29891	S	H49Y	SNP	Spike	S:H49Y	C21707T
EPI_ISL_425425	21709	T	C	21709	29903	S	H49H	SNP_silent	Spike	S:H49H	T21709C
EPI_ISL_441124	21709	T	C	21655	29807	S	H49H	SNP_silent	Spike	S:H49H	T21709C
EPI_ISL_441150	21709	T	C	21655	29849	S	H49H	SNP_silent	Spike	S:H49H	T21709C
EPI_ISL_443572	21709	T	C	21655	29782	S	H49H	SNP_silent	Spike	S:H49H	T21709C
EPI_ISL_470271	21709	T	C	21655	29782	S	H49H	SNP_silent	Spike	S:H49H	T21709C
EPI_ISL_451383	21711	C	T	21711	29903	S	S50L	SNP	Spike	S:S50L	C21711T
EPI_ISL_419880	21711	C	T	21709	29901	S	S50L	SNP	Spike	S:S50L	C21711T
EPI_ISL_419952	21711	C	T	21707	29899	S	S50L	SNP	Spike	S:S50L	C21711T
EPI_ISL_419954	21711	C	T	21703	29895	S	S50L	SNP	Spike	S:S50L	C21711T
EPI_ISL_426677	21711	C	T	21688	29833	S	S50L	SNP	Spike	S:S50L	C21711T
EPI_ISL_426690	21711	C	T	21709	29853	S	S50L	SNP	Spike	S:S50L	C21711T
EPI_ISL_426748	21711	C	T	21711	29903	S	S50L	SNP	Spike	S:S50L	C21711T
EPI_ISL_430552	21711	C	T	21711	29903	S	S50L	SNP	Spike	S:S50L	C21711T
EPI_ISL_430686	21711	C	T	21711	29903	S	S50L	SNP	Spike	S:S50L	C21711T
EPI_ISL_430687	21711	C	T	21711	29903	S	S50L	SNP	Spike	S:S50L	C21711T
EPI_ISL_437294	21711	C	T	21711	29903	S	S50L	SNP	Spike	S:S50L	C21711T
EPI_ISL_440265	21711	C	T	21657	29782	S	S50L	SNP	Spike	S:S50L	C21711T
EPI_ISL_440369	21711	C	T	21657	29782	S	S50L	SNP	Spike	S:S50L	C21711T
EPI_ISL_440425	21711	C	T	21657	29782	S	S50L	SNP	Spike	S:S50L	C21711T
EPI_ISL_451082	21711	C	T	21709	29901	S	S50L	SNP	Spike	S:S50L	C21711T
EPI_ISL_461539	21711	C	T	21711	29903	S	S50L	SNP	Spike	S:S50L	C21711T
EPI_ISL_463337	21711	C	T	21711	29903	S	S50L	SNP	Spike	S:S50L	C21711T
EPI_ISL_466875	21711	C	T	21711	29903	S	S50L	SNP	Spike	S:S50L	C21711T
EPI_ISL_467994	21711	C	T	21676	29868	S	S50L	SNP	Spike	S:S50L	C21711T
EPI_ISL_455407	21711	C	T	21677	29869	S	S50L	SNP	Spike	S:S50L	C21711T
EPI_ISL_424352	21711	C	T	21711	29903	S	S50L	SNP	Spike	S:S50L	C21711T
EPI_ISL_451369	21711	C	T	21711	29894	S	S50L	SNP	Spike	S:S50L	C21711T
EPI_ISL_451348	21711	C	T	21711	29903	S	S50L	SNP	Spike	S:S50L	C21711T
EPI_ISL_457697	21711	C	T	21711	29891	S	S50L	SNP	Spike	S:S50L	C21711T
EPI_ISL_457698	21711	C	T	21711	29891	S	S50L	SNP	Spike	S:S50L	C21711T
EPI_ISL_413869	21711	C	T	21711	29903	S	S50L	SNP	Spike	S:S50L	C21711T
EPI_ISL_420111	21711	C	T	21699	29833	S	S50L	SNP	Spike	S:S50L	C21711T
EPI_ISL_440243	21712	A	G	21658	29782	S	S50S	SNP_silent	Spike	S:S50S	A21712G
EPI_ISL_438256	21714	C	T	21660	29782	S	T51I	SNP	Spike	S:T51I	C21714T
EPI_ISL_438275	21714	C	T	21660	29782	S	T51I	SNP	Spike	S:T51I	C21714T
EPI_ISL_438285	21714	C	T	21660	29782	S	T51I	SNP	Spike	S:T51I	C21714T
EPI_ISL_438490	21714	C	T	21660	29782	S	T51I	SNP	Spike	S:T51I	C21714T
EPI_ISL_439394	21714	C	T	21660	29782	S	T51I	SNP	Spike	S:T51I	C21714T
EPI_ISL_457398	21714	C	T	21688	29877	S	T51I	SNP	Spike	S:T51I	C21714T
EPI_ISL_457439	21714	C	T	21675	29864	S	T51I	SNP	Spike	S:T51I	C21714T
EPI_ISL_457446	21714	C	T	21667	29856	S	T51I	SNP	Spike	S:T51I	C21714T
EPI_ISL_457449	21714	C	T	21682	29871	S	T51I	SNP	Spike	S:T51I	C21714T
EPI_ISL_457451	21714	C	T	21705	29894	S	T51I	SNP	Spike	S:T51I	C21714T
EPI_ISL_459454	21714	C	T	21651	29774	S	T51I	SNP	Spike	S:T51I	C21714T
EPI_ISL_472572	21714	C	T	21676	29865	S	T51I	SNP	Spike	S:T51I	C21714T
EPI_ISL_432729	21717	A	T	21717	29882	S	Q52L	SNP	Spike	S:Q52L	A21717T
EPI_ISL_458601	21717	A	T	21663	29782	S	Q52L	SNP	Spike	S:Q52L	A21717T
EPI_ISL_458612	21717	A	T	21663	29783	S	Q52L	SNP	Spike	S:Q52L	A21717T
EPI_ISL_458675	21717	A	T	21663	29782	S	Q52L	SNP	Spike	S:Q52L	A21717T
EPI_ISL_458686	21717	A	T	21663	29782	S	Q52L	SNP	Spike	S:Q52L	A21717T
EPI_ISL_449291	21718	G	T	21718	29903	S	Q52H	SNP	Spike	S:Q52H	G21718T
EPI_ISL_418834	21721	C	T	21721	29903	S	D53D	SNP_silent	Spike	S:D53D	C21721T
EPI_ISL_434674	21721	C	T	21721	29903	S	D53D	SNP_silent	Spike	S:D53D	C21721T
EPI_ISL_442822	21721	C	T	21667	29811	S	D53D	SNP_silent	Spike	S:D53D	C21721T
EPI_ISL_445515	21721	C	T	21719	29901	S	D53D	SNP_silent	Spike	S:D53D	C21721T
EPI_ISL_459992	21721	C	T	21721	29903	S	D53D	SNP_silent	Spike	S:D53D	C21721T
EPI_ISL_459993	21721	C	T	21721	29903	S	D53D	SNP_silent	Spike	S:D53D	C21721T
EPI_ISL_459998	21721	C	T	21721	29903	S	D53D	SNP_silent	Spike	S:D53D	C21721T
EPI_ISL_471781	21721	C	T	21721	29903	S	D53D	SNP_silent	Spike	S:D53D	C21721T
EPI_ISL_471800	21721	C	T	21721	29903	S	D53D	SNP_silent	Spike	S:D53D	C21721T
EPI_ISL_471804	21721	C	T	21721	29896	S	D53D	SNP_silent	Spike	S:D53D	C21721T
EPI_ISL_471846	21721	C	T	21721	29889	S	D53D	SNP_silent	Spike	S:D53D	C21721T
EPI_ISL_474325	21721	C	T	21686	29868	S	D53D	SNP_silent	Spike	S:D53D	C21721T
EPI_ISL_423012	21721	C	T	21461	29668	S	D53D	SNP_silent	Spike	S:D53D	C21721T
EPI_ISL_434531	21721	C	T	21456	29409	S	D53D	SNP_silent	Spike	S:D53D	C21721T
EPI_ISL_434125	21721	C	T	21721	29903	S	D53D	SNP_silent	Spike	S:D53D	C21721T
EPI_ISL_422329	21722	T	C	21686	29867	S	D53D	SNP_silent	Spike	S:D53D	T21722C
EPI_ISL_429620	21723	T	G	21692	29872	S	L54W	SNP	Spike	S:L54W	T21723G
EPI_ISL_416757	21724	G	T	21726	29879	S	L54F	SNP	Spike	S:L54F	G21724T
EPI_ISL_418042	21724	G	C	21642	29821	S	L54F	SNP	Spike	S:L54F	G21724C
EPI_ISL_418704	21724	G	T	21724	29903	S	L54F	SNP	Spike	S:L54F	G21724T
EPI_ISL_419502	21724	G	T	21694	29873	S	L54F	SNP	Spike	S:L54F	G21724T
EPI_ISL_421793	21724	G	T	21724	29903	S	L54F	SNP	Spike	S:L54F	G21724T
EPI_ISL_421852	21724	G	T	21724	29903	S	L54F	SNP	Spike	S:L54F	G21724T
EPI_ISL_423120	21724	G	T	21724	29903	S	L54F	SNP	Spike	S:L54F	G21724T
EPI_ISL_423281	21724	G	T	21724	29903	S	L54F	SNP	Spike	S:L54F	G21724T
EPI_ISL_423287	21724	G	T	21724	29903	S	L54F	SNP	Spike	S:L54F	G21724T
EPI_ISL_423348	21724	G	T	21724	29903	S	L54F	SNP	Spike	S:L54F	G21724T
EPI_ISL_423369	21724	G	T	21721	29900	S	L54F	SNP	Spike	S:L54F	G21724T
EPI_ISL_423565	21724	G	T	21724	29903	S	L54F	SNP	Spike	S:L54F	G21724T
EPI_ISL_423661	21724	G	T	21724	29903	S	L54F	SNP	Spike	S:L54F	G21724T
EPI_ISL_424040	21724	G	T	21724	29903	S	L54F	SNP	Spike	S:L54F	G21724T
EPI_ISL_425278	21724	G	T	21724	29903	S	L54F	SNP	Spike	S:L54F	G21724T
EPI_ISL_425339	21724	G	T	21724	29903	S	L54F	SNP	Spike	S:L54F	G21724T
EPI_ISL_425429	21724	G	T	21724	29903	S	L54F	SNP	Spike	S:L54F	G21724T
EPI_ISL_425606	21724	G	T	21724	29903	S	L54F	SNP	Spike	S:L54F	G21724T
EPI_ISL_425936	21724	G	T	21724	29903	S	L54F	SNP	Spike	S:L54F	G21724T
EPI_ISL_426679	21724	G	T	21686	29865	S	L54F	SNP	Spike	S:L54F	G21724T
EPI_ISL_427087	21724	G	T	21724	29903	S	L54F	SNP	Spike	S:L54F	G21724T
EPI_ISL_430433	21724	G	T	21724	29903	S	L54F	SNP	Spike	S:L54F	G21724T
EPI_ISL_430643	21724	G	T	21724	29903	S	L54F	SNP	Spike	S:L54F	G21724T
EPI_ISL_432197	21724	G	T	21724	29903	S	L54F	SNP	Spike	S:L54F	G21724T
EPI_ISL_432536	21724	G	T	21724	29903	S	L54F	SNP	Spike	S:L54F	G21724T
EPI_ISL_432583	21724	G	T	21724	29903	S	L54F	SNP	Spike	S:L54F	G21724T
EPI_ISL_432643	21724	G	T	21724	29903	S	L54F	SNP	Spike	S:L54F	G21724T
EPI_ISL_432743	21724	G	T	21724	29903	S	L54F	SNP	Spike	S:L54F	G21724T
EPI_ISL_432950	21724	G	T	21724	29903	S	L54F	SNP	Spike	S:L54F	G21724T
EPI_ISL_433063	21724	G	T	21724	29903	S	L54F	SNP	Spike	S:L54F	G21724T
EPI_ISL_433290	21724	G	T	21670	29782	S	L54F	SNP	Spike	S:L54F	G21724T
EPI_ISL_433479	21724	G	T	21724	29903	S	L54F	SNP	Spike	S:L54F	G21724T
EPI_ISL_433553	21724	G	T	21670	29782	S	L54F	SNP	Spike	S:L54F	G21724T
EPI_ISL_433690	21724	G	T	21724	29903	S	L54F	SNP	Spike	S:L54F	G21724T
EPI_ISL_433694	21724	G	T	21724	29903	S	L54F	SNP	Spike	S:L54F	G21724T
EPI_ISL_433702	21724	G	T	21724	29903	S	L54F	SNP	Spike	S:L54F	G21724T
EPI_ISL_433704	21724	G	T	21724	29903	S	L54F	SNP	Spike	S:L54F	G21724T
EPI_ISL_433733	21724	G	T	21724	29903	S	L54F	SNP	Spike	S:L54F	G21724T
EPI_ISL_433753	21724	G	T	21724	29903	S	L54F	SNP	Spike	S:L54F	G21724T
EPI_ISL_433756	21724	G	T	21724	29903	S	L54F	SNP	Spike	S:L54F	G21724T
EPI_ISL_433776	21724	G	T	21724	29903	S	L54F	SNP	Spike	S:L54F	G21724T
EPI_ISL_433799	21724	G	T	21724	29903	S	L54F	SNP	Spike	S:L54F	G21724T
EPI_ISL_433831	21724	G	T	21724	29903	S	L54F	SNP	Spike	S:L54F	G21724T
EPI_ISL_433867	21724	G	T	21724	29903	S	L54F	SNP	Spike	S:L54F	G21724T
EPI_ISL_433917	21724	G	T	21724	29903	S	L54F	SNP	Spike	S:L54F	G21724T
EPI_ISL_433955	21724	G	T	21724	29903	S	L54F	SNP	Spike	S:L54F	G21724T
EPI_ISL_433964	21724	G	T	21724	29903	S	L54F	SNP	Spike	S:L54F	G21724T
EPI_ISL_433992	21724	G	T	21724	29903	S	L54F	SNP	Spike	S:L54F	G21724T
EPI_ISL_434005	21724	G	T	21724	29903	S	L54F	SNP	Spike	S:L54F	G21724T
EPI_ISL_434061	21724	G	T	21724	29903	S	L54F	SNP	Spike	S:L54F	G21724T
EPI_ISL_436942	21724	G	T	21724	29903	S	L54F	SNP	Spike	S:L54F	G21724T
EPI_ISL_437452	21724	G	T	21724	29903	S	L54F	SNP	Spike	S:L54F	G21724T
EPI_ISL_438256	21724	G	T	21670	29782	S	L54F	SNP	Spike	S:L54F	G21724T
EPI_ISL_438275	21724	G	T	21670	29782	S	L54F	SNP	Spike	S:L54F	G21724T
EPI_ISL_438285	21724	G	T	21670	29782	S	L54F	SNP	Spike	S:L54F	G21724T
EPI_ISL_438490	21724	G	T	21670	29782	S	L54F	SNP	Spike	S:L54F	G21724T
EPI_ISL_439394	21724	G	T	21670	29782	S	L54F	SNP	Spike	S:L54F	G21724T
EPI_ISL_440180	21724	G	T	21670	29782	S	L54F	SNP	Spike	S:L54F	G21724T
EPI_ISL_440803	21724	G	T	21670	29812	S	L54F	SNP	Spike	S:L54F	G21724T
EPI_ISL_441978	21724	G	T	21724	29903	S	L54F	SNP	Spike	S:L54F	G21724T
EPI_ISL_442631	21724	G	T	21670	29849	S	L54F	SNP	Spike	S:L54F	G21724T
EPI_ISL_442683	21724	G	T	21670	29804	S	L54F	SNP	Spike	S:L54F	G21724T
EPI_ISL_442742	21724	G	T	21670	29782	S	L54F	SNP	Spike	S:L54F	G21724T
EPI_ISL_442757	21724	G	T	21670	29804	S	L54F	SNP	Spike	S:L54F	G21724T
EPI_ISL_442942	21724	G	T	21670	29782	S	L54F	SNP	Spike	S:L54F	G21724T
EPI_ISL_443274	21724	G	T	21724	29876	S	L54F	SNP	Spike	S:L54F	G21724T
EPI_ISL_444170	21724	G	T	21724	29903	S	L54F	SNP	Spike	S:L54F	G21724T
EPI_ISL_444306	21724	G	T	21724	29903	S	L54F	SNP	Spike	S:L54F	G21724T
EPI_ISL_444321	21724	G	T	21724	29903	S	L54F	SNP	Spike	S:L54F	G21724T
EPI_ISL_444329	21724	G	T	21724	29903	S	L54F	SNP	Spike	S:L54F	G21724T
EPI_ISL_444408	21724	G	T	21724	29903	S	L54F	SNP	Spike	S:L54F	G21724T
EPI_ISL_444486	21724	G	T	21724	29903	S	L54F	SNP	Spike	S:L54F	G21724T
EPI_ISL_444857	21724	G	T	21724	29903	S	L54F	SNP	Spike	S:L54F	G21724T
EPI_ISL_447033	21724	G	T	21724	29903	S	L54F	SNP	Spike	S:L54F	G21724T
EPI_ISL_447046	21724	G	T	21724	29903	S	L54F	SNP	Spike	S:L54F	G21724T
EPI_ISL_448020	21724	G	T	21718	29897	S	L54F	SNP	Spike	S:L54F	G21724T
EPI_ISL_448070	21724	G	T	21724	29903	S	L54F	SNP	Spike	S:L54F	G21724T
EPI_ISL_448079	21724	G	T	21724	29903	S	L54F	SNP	Spike	S:L54F	G21724T
EPI_ISL_448082	21724	G	T	21724	29903	S	L54F	SNP	Spike	S:L54F	G21724T
EPI_ISL_448360	21724	G	T	21720	29899	S	L54F	SNP	Spike	S:L54F	G21724T
EPI_ISL_448963	21724	G	T	21686	29865	S	L54F	SNP	Spike	S:L54F	G21724T
EPI_ISL_450830	21724	G	T	21724	29903	S	L54F	SNP	Spike	S:L54F	G21724T
EPI_ISL_451153	21724	G	T	21724	29903	S	L54F	SNP	Spike	S:L54F	G21724T
EPI_ISL_452937	21724	G	T	21724	29903	S	L54F	SNP	Spike	S:L54F	G21724T
EPI_ISL_452952	21724	G	T	21724	29903	S	L54F	SNP	Spike	S:L54F	G21724T
EPI_ISL_453543	21724	G	T	21724	29903	S	L54F	SNP	Spike	S:L54F	G21724T
EPI_ISL_453725	21724	G	T	21724	29903	S	L54F	SNP	Spike	S:L54F	G21724T
EPI_ISL_454293	21724	G	T	21684	29763	S	L54F	SNP	Spike	S:L54F	G21724T
EPI_ISL_455698	21724	G	T	21724	29903	S	L54F	SNP	Spike	S:L54F	G21724T
EPI_ISL_455701	21724	G	T	21724	29903	S	L54F	SNP	Spike	S:L54F	G21724T
EPI_ISL_457368	21724	G	T	21722	29901	S	L54F	SNP	Spike	S:L54F	G21724T
EPI_ISL_457398	21724	G	T	21698	29877	S	L54F	SNP	Spike	S:L54F	G21724T
EPI_ISL_457439	21724	G	T	21685	29864	S	L54F	SNP	Spike	S:L54F	G21724T
EPI_ISL_457446	21724	G	T	21677	29856	S	L54F	SNP	Spike	S:L54F	G21724T
EPI_ISL_457449	21724	G	T	21692	29871	S	L54F	SNP	Spike	S:L54F	G21724T
EPI_ISL_457451	21724	G	T	21715	29894	S	L54F	SNP	Spike	S:L54F	G21724T
EPI_ISL_457485	21724	G	T	21724	29903	S	L54F	SNP	Spike	S:L54F	G21724T
EPI_ISL_458100	21724	G	T	21724	29903	S	L54F	SNP	Spike	S:L54F	G21724T
EPI_ISL_458101	21724	G	T	21724	29903	S	L54F	SNP	Spike	S:L54F	G21724T
EPI_ISL_458112	21724	G	T	21724	29903	S	L54F	SNP	Spike	S:L54F	G21724T
EPI_ISL_458113	21724	G	T	21724	29903	S	L54F	SNP	Spike	S:L54F	G21724T
EPI_ISL_458211	21724	G	T	21670	29782	S	L54F	SNP	Spike	S:L54F	G21724T
EPI_ISL_458308	21724	G	T	21670	29782	S	L54F	SNP	Spike	S:L54F	G21724T
EPI_ISL_458312	21724	G	T	21670	29782	S	L54F	SNP	Spike	S:L54F	G21724T
EPI_ISL_458322	21724	G	T	21670	29782	S	L54F	SNP	Spike	S:L54F	G21724T
EPI_ISL_458333	21724	G	T	21670	29782	S	L54F	SNP	Spike	S:L54F	G21724T
EPI_ISL_458393	21724	G	T	21670	29782	S	L54F	SNP	Spike	S:L54F	G21724T
EPI_ISL_458414	21724	G	T	21670	29783	S	L54F	SNP	Spike	S:L54F	G21724T
EPI_ISL_458427	21724	G	T	21670	29783	S	L54F	SNP	Spike	S:L54F	G21724T
EPI_ISL_458428	21724	G	T	21670	29782	S	L54F	SNP	Spike	S:L54F	G21724T
EPI_ISL_458429	21724	G	T	21670	29782	S	L54F	SNP	Spike	S:L54F	G21724T
EPI_ISL_458438	21724	G	T	21670	29782	S	L54F	SNP	Spike	S:L54F	G21724T
EPI_ISL_458447	21724	G	T	21670	29782	S	L54F	SNP	Spike	S:L54F	G21724T
EPI_ISL_458454	21724	G	T	21670	29784	S	L54F	SNP	Spike	S:L54F	G21724T
EPI_ISL_458472	21724	G	T	21670	29782	S	L54F	SNP	Spike	S:L54F	G21724T
EPI_ISL_458494	21724	G	T	21670	29782	S	L54F	SNP	Spike	S:L54F	G21724T
EPI_ISL_458504	21724	G	T	21670	29782	S	L54F	SNP	Spike	S:L54F	G21724T
EPI_ISL_458510	21724	G	T	21670	29782	S	L54F	SNP	Spike	S:L54F	G21724T
EPI_ISL_458518	21724	G	T	21670	29782	S	L54F	SNP	Spike	S:L54F	G21724T
EPI_ISL_458532	21724	G	T	21670	29782	S	L54F	SNP	Spike	S:L54F	G21724T
EPI_ISL_458608	21724	G	T	21670	29782	S	L54F	SNP	Spike	S:L54F	G21724T
EPI_ISL_459454	21724	G	T	21661	29774	S	L54F	SNP	Spike	S:L54F	G21724T
EPI_ISL_461874	21724	G	T	21707	29886	S	L54F	SNP	Spike	S:L54F	G21724T
EPI_ISL_462150	21724	G	A	21700	29755	S	L54L	SNP_silent	Spike	S:L54L	G21724A
EPI_ISL_464839	21724	G	T	21724	29903	S	L54F	SNP	Spike	S:L54F	G21724T
EPI_ISL_465572	21724	G	T	21724	29903	S	L54F	SNP	Spike	S:L54F	G21724T
EPI_ISL_465574	21724	G	T	21724	29903	S	L54F	SNP	Spike	S:L54F	G21724T
EPI_ISL_465575	21724	G	T	21724	29903	S	L54F	SNP	Spike	S:L54F	G21724T
EPI_ISL_465665	21724	G	A	21724	29903	S	L54L	SNP_silent	Spike	S:L54L	G21724A
EPI_ISL_465669	21724	G	A	21724	29903	S	L54L	SNP_silent	Spike	S:L54L	G21724A
EPI_ISL_465722	21724	G	T	21724	29903	S	L54F	SNP	Spike	S:L54F	G21724T
EPI_ISL_465725	21724	G	T	21724	29903	S	L54F	SNP	Spike	S:L54F	G21724T
EPI_ISL_465788	21724	G	T	21724	29903	S	L54F	SNP	Spike	S:L54F	G21724T
EPI_ISL_465991	21724	G	T	21724	29903	S	L54F	SNP	Spike	S:L54F	G21724T
EPI_ISL_465992	21724	G	T	21724	29903	S	L54F	SNP	Spike	S:L54F	G21724T
EPI_ISL_466589	21724	G	T	21724	29903	S	L54F	SNP	Spike	S:L54F	G21724T
EPI_ISL_469038	21724	G	T	21724	29903	S	L54F	SNP	Spike	S:L54F	G21724T
EPI_ISL_469045	21724	G	T	21724	29903	S	L54F	SNP	Spike	S:L54F	G21724T
EPI_ISL_469047	21724	G	T	21724	29903	S	L54F	SNP	Spike	S:L54F	G21724T
EPI_ISL_469370	21724	G	T	21670	29782	S	L54F	SNP	Spike	S:L54F	G21724T
EPI_ISL_469385	21724	G	T	21670	29782	S	L54F	SNP	Spike	S:L54F	G21724T
EPI_ISL_469450	21724	G	T	21670	29782	S	L54F	SNP	Spike	S:L54F	G21724T
EPI_ISL_469465	21724	G	T	21670	29782	S	L54F	SNP	Spike	S:L54F	G21724T
EPI_ISL_469476	21724	G	T	21670	29782	S	L54F	SNP	Spike	S:L54F	G21724T
EPI_ISL_469477	21724	G	T	21670	29783	S	L54F	SNP	Spike	S:L54F	G21724T
EPI_ISL_469481	21724	G	T	21670	29782	S	L54F	SNP	Spike	S:L54F	G21724T
EPI_ISL_469489	21724	G	T	21670	29782	S	L54F	SNP	Spike	S:L54F	G21724T
EPI_ISL_469514	21724	G	T	21670	29782	S	L54F	SNP	Spike	S:L54F	G21724T
EPI_ISL_469517	21724	G	T	21670	29782	S	L54F	SNP	Spike	S:L54F	G21724T
EPI_ISL_469522	21724	G	T	21670	29782	S	L54F	SNP	Spike	S:L54F	G21724T
EPI_ISL_469576	21724	G	T	21670	29782	S	L54F	SNP	Spike	S:L54F	G21724T
EPI_ISL_469652	21724	G	T	21670	29782	S	L54F	SNP	Spike	S:L54F	G21724T
EPI_ISL_469659	21724	G	T	21670	29782	S	L54F	SNP	Spike	S:L54F	G21724T
EPI_ISL_470322	21724	G	T	21670	29782	S	L54F	SNP	Spike	S:L54F	G21724T
EPI_ISL_471988	21724	G	T	21724	29903	S	L54F	SNP	Spike	S:L54F	G21724T
EPI_ISL_472372	21724	G	T	21694	29873	S	L54F	SNP	Spike	S:L54F	G21724T
EPI_ISL_472373	21724	G	T	21694	29873	S	L54F	SNP	Spike	S:L54F	G21724T
EPI_ISL_472374	21724	G	T	21718	29897	S	L54F	SNP	Spike	S:L54F	G21724T
EPI_ISL_472447	21724	G	T	21690	29869	S	L54F	SNP	Spike	S:L54F	G21724T
EPI_ISL_472572	21724	G	T	21686	29865	S	L54F	SNP	Spike	S:L54F	G21724T
EPI_ISL_474745	21724	G	T	21691	29870	S	L54F	SNP	Spike	S:L54F	G21724T
EPI_ISL_475009	21724	G	T	21724	29903	S	L54F	SNP	Spike	S:L54F	G21724T
EPI_ISL_422630	21724	G	T	21667	29772	S	L54F	SNP	Spike	S:L54F	G21724T
EPI_ISL_463513	21724	G	C	21724	29903	S	L54F	SNP	Spike	S:L54F	G21724C
EPI_ISL_444849	21724	G	T	21721	29900	S	L54F	SNP	Spike	S:L54F	G21724T
EPI_ISL_418296	21724	G	T	21724	29903	S	L54F	SNP	Spike	S:L54F	G21724T
EPI_ISL_441826	21724	G	T	21670	29849	S	L54F	SNP	Spike	S:L54F	G21724T
EPI_ISL_464840	21724	G	T	21724	29903	S	L54F	SNP	Spike	S:L54F	G21724T
EPI_ISL_455399	21724	G	T	21723	29902	S	L54F	SNP	Spike	S:L54F	G21724T
EPI_ISL_434143	21724	G	T	21724	29903	S	L54F	SNP	Spike	S:L54F	G21724T
EPI_ISL_434279	21724	G	T	21724	29903	S	L54F	SNP	Spike	S:L54F	G21724T
EPI_ISL_463413	21724	G	T	21724	29903	S	L54F	SNP	Spike	S:L54F	G21724T
EPI_ISL_424086	21724	G	T	21724	29903	S	L54F	SNP	Spike	S:L54F	G21724T
EPI_ISL_415538	21724	G	T	21670	29782	S	L54F	SNP	Spike	S:L54F	G21724T
EPI_ISL_429620	21725	T	A	21694	29872	S	F55I	SNP	Spike	S:F55I	T21725A
EPI_ISL_461433	21726	T	G	21633	29769	S	F55C	SNP	Spike	S:F55C	T21726G
EPI_ISL_434659	21727	C	T	21727	29903	S	F55F	SNP_silent	Spike	S:F55F	C21727T
EPI_ISL_435042	21727	C	T	21727	29880	S	F55F	SNP_silent	Spike	S:F55F	C21727T
EPI_ISL_465552	21727	C	T	21727	29903	S	F55F	SNP_silent	Spike	S:F55F	C21727T
EPI_ISL_465661	21727	C	T	21727	29903	S	F55F	SNP_silent	Spike	S:F55F	C21727T
EPI_ISL_421908	21727	C	T	21727	29903	S	F55F	SNP_silent	Spike	S:F55F	C21727T
EPI_ISL_421687	21727	C	T	21673	29782	S	F55F	SNP_silent	Spike	S:F55F	C21727T
EPI_ISL_474990	21731	C	T	21731	29903	S	P57S	SNP	Spike	S:P57S	C21731T
EPI_ISL_429620	21732	C	T	21701	29872	S	P57L	SNP	Spike	S:P57L	C21732T
EPI_ISL_427168	21736	C	T	21681	29838	S	F58F	SNP_silent	Spike	S:F58F	C21736T
EPI_ISL_427490	21736	C	T	21736	29903	S	F58F	SNP_silent	Spike	S:F58F	C21736T
EPI_ISL_449154	21736	C	T	21729	29896	S	F58F	SNP_silent	Spike	S:F58F	C21736T
EPI_ISL_457350	21736	C	T	21728	29895	S	F58F	SNP_silent	Spike	S:F58F	C21736T
EPI_ISL_457418	21736	C	T	21734	29901	S	F58F	SNP_silent	Spike	S:F58F	C21736T
EPI_ISL_457468	21736	C	T	21732	29899	S	F58F	SNP_silent	Spike	S:F58F	C21736T
EPI_ISL_457476	21736	C	T	21736	29903	S	F58F	SNP_silent	Spike	S:F58F	C21736T
EPI_ISL_461806	21736	C	T	21732	29899	S	F58F	SNP_silent	Spike	S:F58F	C21736T
EPI_ISL_461850	21736	C	T	21735	29902	S	F58F	SNP_silent	Spike	S:F58F	C21736T
EPI_ISL_472394	21736	C	T	21736	29903	S	F58F	SNP_silent	Spike	S:F58F	C21736T
EPI_ISL_474183	21736	C	T	21734	29901	S	F58F	SNP_silent	Spike	S:F58F	C21736T
EPI_ISL_448648	21739	T	.	21738	29902	S	F59	deletion_frameshift	Spike	S:F59	T21739.
EPI_ISL_420372	21742	C	T	21688	29782	S	S60S	SNP_silent	Spike	S:S60S	C21742T
EPI_ISL_423015	21742	C	T	21711	29842	S	S60S	SNP_silent	Spike	S:S60S	C21742T
EPI_ISL_428791	21742	C	T	21742	29903	S	S60S	SNP_silent	Spike	S:S60S	C21742T
EPI_ISL_429301	21742	C	T	21742	29903	S	S60S	SNP_silent	Spike	S:S60S	C21742T
EPI_ISL_429306	21742	C	T	21742	29903	S	S60S	SNP_silent	Spike	S:S60S	C21742T
EPI_ISL_429309	21742	C	T	21742	29903	S	S60S	SNP_silent	Spike	S:S60S	C21742T
EPI_ISL_435574	21742	C	T	21742	29840	S	S60S	SNP_silent	Spike	S:S60S	C21742T
EPI_ISL_435575	21742	C	T	21742	29840	S	S60S	SNP_silent	Spike	S:S60S	C21742T
EPI_ISL_437007	21742	C	T	21742	29903	S	S60S	SNP_silent	Spike	S:S60S	C21742T
EPI_ISL_437601	21742	C	T	21688	29782	S	S60S	SNP_silent	Spike	S:S60S	C21742T
EPI_ISL_445148	21742	C	T	21742	29903	S	S60S	SNP_silent	Spike	S:S60S	C21742T
EPI_ISL_448407	21742	C	T	21742	29903	S	S60S	SNP_silent	Spike	S:S60S	C21742T
EPI_ISL_452056	21742	C	T	21742	29903	S	S60S	SNP_silent	Spike	S:S60S	C21742T
EPI_ISL_457301	21742	C	T	21742	29903	S	S60S	SNP_silent	Spike	S:S60S	C21742T
EPI_ISL_434069	21742	C	T	21742	29903	S	S60S	SNP_silent	Spike	S:S60S	C21742T
EPI_ISL_425277	21742	C	T	21742	29903	S	S60S	SNP_silent	Spike	S:S60S	C21742T
EPI_ISL_425346	21742	C	T	21742	29903	S	S60S	SNP_silent	Spike	S:S60S	C21742T
EPI_ISL_427007	21742	C	T	21742	29903	S	S60S	SNP_silent	Spike	S:S60S	C21742T
EPI_ISL_439410	21742	C	T	21688	29849	S	S60S	SNP_silent	Spike	S:S60S	C21742T
EPI_ISL_439414	21742	C	T	21688	29849	S	S60S	SNP_silent	Spike	S:S60S	C21742T
EPI_ISL_439463	21742	C	T	21688	29812	S	S60S	SNP_silent	Spike	S:S60S	C21742T
EPI_ISL_439581	21742	C	T	21688	29849	S	S60S	SNP_silent	Spike	S:S60S	C21742T
EPI_ISL_452930	21742	C	T	21742	29903	S	S60S	SNP_silent	Spike	S:S60S	C21742T
EPI_ISL_432197	21745	T	C	21745	29903	S	N61N	SNP_silent	Spike	S:N61N	T21745C
EPI_ISL_445597	21745	T	C	21743	29901	S	N61N	SNP_silent	Spike	S:N61N	T21745C
EPI_ISL_445781	21745	T	C	21709	29867	S	N61N	SNP_silent	Spike	S:N61N	T21745C
EPI_ISL_446465	21745	T	C	21707	29865	S	N61N	SNP_silent	Spike	S:N61N	T21745C
EPI_ISL_446866	21745	T	C	21707	29865	S	N61N	SNP_silent	Spike	S:N61N	T21745C
EPI_ISL_471632	21745	T	C	21712	29833	S	N61N	SNP_silent	Spike	S:N61N	T21745C
EPI_ISL_472691	21745	T	C	21743	29901	S	N61N	SNP_silent	Spike	S:N61N	T21745C
EPI_ISL_472818	21745	T	C	21741	29899	S	N61N	SNP_silent	Spike	S:N61N	T21745C
EPI_ISL_472851	21745	T	C	21741	29899	S	N61N	SNP_silent	Spike	S:N61N	T21745C
EPI_ISL_474152	21745	T	C	21741	29899	S	N61N	SNP_silent	Spike	S:N61N	T21745C
EPI_ISL_474247	21745	T	C	21707	29865	S	N61N	SNP_silent	Spike	S:N61N	T21745C
EPI_ISL_474263	21745	T	C	21707	29865	S	N61N	SNP_silent	Spike	S:N61N	T21745C
EPI_ISL_474676	21745	T	C	21741	29899	S	N61N	SNP_silent	Spike	S:N61N	T21745C
EPI_ISL_442769	21745	T	C	21694	29785	S	N61N	SNP_silent	Spike	S:N61N	T21745C
EPI_ISL_420246	21745	T	C	21745	29903	S	N61N	SNP_silent	Spike	S:N61N	T21745C
EPI_ISL_434179	21745	T	C	21745	29903	S	N61N	SNP_silent	Spike	S:N61N	T21745C
EPI_ISL_463465	21745	T	C	21745	29903	S	N61N	SNP_silent	Spike	S:N61N	T21745C
EPI_ISL_465608	21745	T	C	21745	29903	S	N61N	SNP_silent	Spike	S:N61N	T21745C
EPI_ISL_442699	21745	T	C	21694	29815	S	N61N	SNP_silent	Spike	S:N61N	T21745C
EPI_ISL_429152	21746	G	T	21746	29903	S	V62F	SNP	Spike	S:V62F	G21746T
EPI_ISL_473646	21746	G	C	21692	29782	S	V62L	SNP	Spike	S:V62L	G21746C
EPI_ISL_460743	21748	T	C	21694	29775	S	V62V	SNP_silent	Spike	S:V62V	T21748C
EPI_ISL_442963	21750	C	T	21696	29782	S	T63I	SNP	Spike	S:T63I	C21750T
EPI_ISL_422052	21753	G	T	21749	29899	S	W64L	SNP	Spike	S:W64L	G21753T
EPI_ISL_422184	21753	G	T	21722	29872	S	W64L	SNP	Spike	S:W64L	G21753T
EPI_ISL_452072	21756	TCCATGCTATACATGTCTCTGGG	.	21716	29841	S	F65	deletion_frameshift	Spike	S:F65	TCCATGCTATACATGTCTCTGGG21756.
EPI_ISL_449819	21757	C	T	21757	29903	S	F65F	SNP_silent	Spike	S:F65F	C21757T
EPI_ISL_435401	21761	G	T	21761	29903	S	A67S	SNP	Spike	S:A67S	G21761T
EPI_ISL_453951	21761	G	T	21611	29653	S	A67S	SNP	Spike	S:A67S	G21761T
EPI_ISL_453953	21761	G	T	21531	29564	S	A67S	SNP	Spike	S:A67S	G21761T
EPI_ISL_453961	21761	G	T	21721	29747	S	A67S	SNP	Spike	S:A67S	G21761T
EPI_ISL_454254	21761	G	T	21721	29763	S	A67S	SNP	Spike	S:A67S	G21761T
EPI_ISL_465241	21761	G	T	21761	29903	S	A67S	SNP	Spike	S:A67S	G21761T
EPI_ISL_473486	21761	G	A	21761	29903	S	A67T	SNP	Spike	S:A67T	G21761A
EPI_ISL_430504	21761	G	T	21761	29902	S	A67S	SNP	Spike	S:A67S	G21761T
EPI_ISL_436901	21762	C	T	21722	29863	S	A67V	SNP	Spike	S:A67V	C21762T
EPI_ISL_441701	21762	C	T	21708	29849	S	A67V	SNP	Spike	S:A67V	C21762T
EPI_ISL_445015	21762	C	T	21758	29863	S	A67V	SNP	Spike	S:A67V	C21762T
EPI_ISL_448603	21762	C	T	21762	29894	S	A67V	SNP	Spike	S:A67V	C21762T
EPI_ISL_450068	21762	C	T	21698	29714	S	A67V	SNP	Spike	S:A67V	C21762T
EPI_ISL_450555	21762	C	T	21725	29865	S	A67V	SNP	Spike	S:A67V	C21762T
EPI_ISL_456800	21762	C	T	21708	29784	S	A67V	SNP	Spike	S:A67V	C21762T
EPI_ISL_465506	21762	C	T	21762	29903	S	A67V	SNP	Spike	S:A67V	C21762T
EPI_ISL_416884	21764	ATACATGTCTCTGGGACCAATGGTACT	.	21750	29831	S	I68	deletion	Spike	S:I68	ATACATGTCTCTGGGACCAATGGTACT21764.
EPI_ISL_434692	21764	ATACATGTCTCTGGGACCAATGGT	.	21752	29821	S	I68	deletion	Spike	S:I68	ATACATGTCTCTGGGACCAATGGT21764.
EPI_ISL_444275	21764	ATACATGTCTCTGGGACCAATGGTACT	.	21760	29857	S	I68	deletion	Spike	S:I68	ATACATGTCTCTGGGACCAATGGTACT21764.
EPI_ISL_456517	21765	TACATG	.	21764	29897	S	H69	deletion	Spike	S:H69	TACATG21765.
EPI_ISL_453709	21765	TACATG	.	21764	29897	S	H69	deletion	Spike	S:H69	TACATG21765.
EPI_ISL_426526	21767	C	T	21767	29882	S	H69Y	SNP	Spike	S:H69Y	C21767T
EPI_ISL_426536	21767	C	T	21767	29882	S	H69Y	SNP	Spike	S:H69Y	C21767T
EPI_ISL_434864	21767	C	T	21767	29903	S	H69Y	SNP	Spike	S:H69Y	C21767T
EPI_ISL_460369	21767	C	T	21745	29854	S	H69Y	SNP	Spike	S:H69Y	C21767T
EPI_ISL_463589	21767	C	T	21767	29903	S	H69Y	SNP	Spike	S:H69Y	C21767T
EPI_ISL_467619	21767	C	T	21767	29903	S	H69Y	SNP	Spike	S:H69Y	C21767T
EPI_ISL_468698	21767	C	T	21767	29903	S	H69Y	SNP	Spike	S:H69Y	C21767T
EPI_ISL_461010	21767	C	T	21713	29775	S	H69Y	SNP	Spike	S:H69Y	C21767T
EPI_ISL_451360	21767	C	T	21767	29903	S	H69Y	SNP	Spike	S:H69Y	C21767T
EPI_ISL_466203	21768	A	T	21768	29903	S	H69L	SNP	Spike	S:H69L	A21768T
EPI_ISL_469067	21770	G	T	21770	29903	S	V70F	SNP	Spike	S:V70F	G21770T
EPI_ISL_446026	21770	G	T	21767	29900	S	V70F	SNP	Spike	S:V70F	G21770T
EPI_ISL_424262	21770	G	T	21735	29867	S	V70F	SNP	Spike	S:V70F	G21770T
EPI_ISL_421996	21772	C	T	21772	29903	S	V70V	SNP_silent	Spike	S:V70V	C21772T
EPI_ISL_425454	21772	C	T	21772	29903	S	V70V	SNP_silent	Spike	S:V70V	C21772T
EPI_ISL_426809	21772	C	T	21772	29903	S	V70V	SNP_silent	Spike	S:V70V	C21772T
EPI_ISL_429573	21772	C	T	21772	29903	S	V70V	SNP_silent	Spike	S:V70V	C21772T
EPI_ISL_433945	21772	C	T	21772	29903	S	V70V	SNP_silent	Spike	S:V70V	C21772T
EPI_ISL_433969	21772	C	T	21772	29903	S	V70V	SNP_silent	Spike	S:V70V	C21772T
EPI_ISL_438595	21772	C	T	21772	29903	S	V70V	SNP_silent	Spike	S:V70V	C21772T
EPI_ISL_438651	21772	C	T	21772	29903	S	V70V	SNP_silent	Spike	S:V70V	C21772T
EPI_ISL_441020	21772	C	T	21772	29903	S	V70V	SNP_silent	Spike	S:V70V	C21772T
EPI_ISL_441350	21772	C	T	21772	29903	S	V70V	SNP_silent	Spike	S:V70V	C21772T
EPI_ISL_444209	21772	C	T	21772	29903	S	V70V	SNP_silent	Spike	S:V70V	C21772T
EPI_ISL_445067	21772	C	T	21772	29860	S	V70V	SNP_silent	Spike	S:V70V	C21772T
EPI_ISL_456022	21772	C	T	21772	29903	S	V70V	SNP_silent	Spike	S:V70V	C21772T
EPI_ISL_457808	21772	C	T	21772	29903	S	V70V	SNP_silent	Spike	S:V70V	C21772T
EPI_ISL_458376	21772	C	T	21718	29782	S	V70V	SNP_silent	Spike	S:V70V	C21772T
EPI_ISL_464092	21772	C	T	21733	29854	S	V70V	SNP_silent	Spike	S:V70V	C21772T
EPI_ISL_464094	21772	C	T	21771	29901	S	V70V	SNP_silent	Spike	S:V70V	C21772T
EPI_ISL_465997	21772	C	T	21772	29903	S	V70V	SNP_silent	Spike	S:V70V	C21772T
EPI_ISL_471797	21772	C	T	21772	29903	S	V70V	SNP_silent	Spike	S:V70V	C21772T
EPI_ISL_470525	21772	C	T	21718	29782	S	V70V	SNP_silent	Spike	S:V70V	C21772T
EPI_ISL_469147	21772	C	T	21772	29843	S	V70V	SNP_silent	Spike	S:V70V	C21772T
EPI_ISL_439469	21774	C	T	21720	29812	S	S71F	SNP	Spike	S:S71F	C21774T
EPI_ISL_458795	21774	C	T	21720	29782	S	S71F	SNP	Spike	S:S71F	C21774T
EPI_ISL_465270	21774	C	A	21774	29903	S	S71Y	SNP	Spike	S:S71Y	C21774A
EPI_ISL_417142	21774	C	T	21774	29903	S	S71F	SNP	Spike	S:S71F	C21774T
EPI_ISL_417143	21774	C	T	21774	29903	S	S71F	SNP	Spike	S:S71F	C21774T
EPI_ISL_424286	21774	C	T	21711	29801	S	S71F	SNP	Spike	S:S71F	C21774T
EPI_ISL_426513	21774	C	T	21774	29882	S	S71F	SNP	Spike	S:S71F	C21774T
EPI_ISL_437531	21774	C	T	21774	29903	S	S71F	SNP	Spike	S:S71F	C21774T
EPI_ISL_468086	21774	C	T	21774	29903	S	S71F	SNP	Spike	S:S71F	C21774T
EPI_ISL_428912	21775	T	C	21775	29903	S	S71S	SNP_silent	Spike	S:S71S	T21775C
EPI_ISL_424164	21775	T	C	21775	29903	S	S71S	SNP_silent	Spike	S:S71S	T21775C
EPI_ISL_421929	21775	T	C	21775	29903	S	S71S	SNP_silent	Spike	S:S71S	T21775C
EPI_ISL_449723	21776	G	A	21776	29903	S	G72R	SNP	Spike	S:G72R	G21776A
EPI_ISL_457634	21776	G	A	21776	29903	S	G72R	SNP	Spike	S:G72R	G21776A
EPI_ISL_466122	21776	G	T	21776	29903	S	G72W	SNP	Spike	S:G72W	G21776T
EPI_ISL_469518	21776	G	T	21722	29782	S	G72W	SNP	Spike	S:G72W	G21776T
EPI_ISL_422904	21776	G	T	21719	29772	S	G72W	SNP	Spike	S:G72W	G21776T
EPI_ISL_455623	21777	G	T	21777	29903	S	G72V	SNP	Spike	S:G72V	G21777T
EPI_ISL_466716	21777	G	A	21777	29903	S	G72E	SNP	Spike	S:G72E	G21777A
EPI_ISL_464551	21777	G	A	21777	29903	S	G72E	SNP	Spike	S:G72E	G21777A
EPI_ISL_465264	21777	G	A	21777	29903	S	G72E	SNP	Spike	S:G72E	G21777A
EPI_ISL_465269	21777	G	A	21777	29903	S	G72E	SNP	Spike	S:G72E	G21777A
EPI_ISL_422664	21778	G	A	21724	29775	S	G72G	SNP_silent	Spike	S:G72G	G21778A
EPI_ISL_422665	21778	G	A	21724	29775	S	G72G	SNP_silent	Spike	S:G72G	G21778A
EPI_ISL_422704	21778	G	A	21724	29775	S	G72G	SNP_silent	Spike	S:G72G	G21778A
EPI_ISL_422705	21778	G	A	21724	29775	S	G72G	SNP_silent	Spike	S:G72G	G21778A
EPI_ISL_434378	21778	G	T	21778	29903	S	G72G	SNP_silent	Spike	S:G72G	G21778T
EPI_ISL_434382	21778	G	T	21778	29903	S	G72G	SNP_silent	Spike	S:G72G	G21778T
EPI_ISL_461117	21778	G	A	21724	29775	S	G72G	SNP_silent	Spike	S:G72G	G21778A
EPI_ISL_469793	21778	G	T	21724	29782	S	G72G	SNP_silent	Spike	S:G72G	G21778T
EPI_ISL_445866	21780	C	T	21780	29903	S	T73I	SNP	Spike	S:T73I	C21780T
EPI_ISL_445871	21780	C	T	21746	29869	S	T73I	SNP	Spike	S:T73I	C21780T
EPI_ISL_446063	21780	C	T	21750	29873	S	T73I	SNP	Spike	S:T73I	C21780T
EPI_ISL_446066	21780	C	T	21762	29885	S	T73I	SNP	Spike	S:T73I	C21780T
EPI_ISL_446100	21780	C	T	21743	29866	S	T73I	SNP	Spike	S:T73I	C21780T
EPI_ISL_446434	21780	C	T	21776	29895	S	T73I	SNP	Spike	S:T73I	C21780T
EPI_ISL_446489	21780	C	T	21772	29895	S	T73I	SNP	Spike	S:T73I	C21780T
EPI_ISL_446577	21780	C	T	21780	29903	S	T73I	SNP	Spike	S:T73I	C21780T
EPI_ISL_446654	21780	C	T	21758	29881	S	T73I	SNP	Spike	S:T73I	C21780T
EPI_ISL_446742	21780	C	T	21780	29903	S	T73I	SNP	Spike	S:T73I	C21780T
EPI_ISL_446847	21780	C	T	21742	29865	S	T73I	SNP	Spike	S:T73I	C21780T
EPI_ISL_472605	21780	C	T	21772	29895	S	T73I	SNP	Spike	S:T73I	C21780T
EPI_ISL_473085	21780	C	T	21775	29898	S	T73I	SNP	Spike	S:T73I	C21780T
EPI_ISL_473135	21780	C	T	21744	29867	S	T73I	SNP	Spike	S:T73I	C21780T
EPI_ISL_474007	21780	C	T	21777	29900	S	T73I	SNP	Spike	S:T73I	C21780T
EPI_ISL_474043	21780	C	T	21768	29891	S	T73I	SNP	Spike	S:T73I	C21780T
EPI_ISL_474155	21780	C	T	21758	29881	S	T73I	SNP	Spike	S:T73I	C21780T
EPI_ISL_474157	21780	C	T	21776	29899	S	T73I	SNP	Spike	S:T73I	C21780T
EPI_ISL_474160	21780	C	T	21765	29888	S	T73I	SNP	Spike	S:T73I	C21780T
EPI_ISL_474209	21780	C	T	21777	29900	S	T73I	SNP	Spike	S:T73I	C21780T
EPI_ISL_474304	21780	C	T	21771	29894	S	T73I	SNP	Spike	S:T73I	C21780T
EPI_ISL_474318	21780	C	T	21780	29903	S	T73I	SNP	Spike	S:T73I	C21780T
EPI_ISL_474362	21780	C	T	21777	29900	S	T73I	SNP	Spike	S:T73I	C21780T
EPI_ISL_474366	21780	C	T	21771	29894	S	T73I	SNP	Spike	S:T73I	C21780T
EPI_ISL_474609	21780	C	T	21780	29891	S	T73I	SNP	Spike	S:T73I	C21780T
EPI_ISL_474624	21780	C	T	21770	29860	S	T73I	SNP	Spike	S:T73I	C21780T
EPI_ISL_474648	21780	C	T	21780	29903	S	T73I	SNP	Spike	S:T73I	C21780T
EPI_ISL_474649	21780	C	T	21759	29882	S	T73I	SNP	Spike	S:T73I	C21780T
EPI_ISL_474719	21780	C	T	21742	29865	S	T73I	SNP	Spike	S:T73I	C21780T
EPI_ISL_474724	21780	C	T	21775	29898	S	T73I	SNP	Spike	S:T73I	C21780T
EPI_ISL_474740	21780	C	T	21780	29903	S	T73I	SNP	Spike	S:T73I	C21780T
EPI_ISL_474776	21780	C	T	21776	29899	S	T73I	SNP	Spike	S:T73I	C21780T
EPI_ISL_474785	21780	C	T	21742	29865	S	T73I	SNP	Spike	S:T73I	C21780T
EPI_ISL_452732	21780	C	A	21780	29903	S	T73N	SNP	Spike	S:T73N	C21780A
EPI_ISL_452734	21780	C	A	21780	29903	S	T73N	SNP	Spike	S:T73N	C21780A
EPI_ISL_420081	21781	C	T	21781	29903	S	T73T	SNP_silent	Spike	S:T73T	C21781T
EPI_ISL_435119	21781	C	T	21781	29903	S	T73T	SNP_silent	Spike	S:T73T	C21781T
EPI_ISL_436340	21781	C	A	21734	29639	S	T73T	SNP_silent	Spike	S:T73T	C21781A
EPI_ISL_437891	21781	C	T	21756	29818	S	T73T	SNP_silent	Spike	S:T73T	C21781T
EPI_ISL_470831	21781	C	T	21731	29806	S	T73T	SNP_silent	Spike	S:T73T	C21781T
EPI_ISL_470850	21781	C	T	21127	29202	S	T73T	SNP_silent	Spike	S:T73T	C21781T
EPI_ISL_472636	21781	C	T	21780	29902	S	T73T	SNP_silent	Spike	S:T73T	C21781T
EPI_ISL_473026	21781	C	T	21779	29901	S	T73T	SNP_silent	Spike	S:T73T	C21781T
EPI_ISL_474002	21781	C	T	21746	29868	S	T73T	SNP_silent	Spike	S:T73T	C21781T
EPI_ISL_474108	21781	C	T	21745	29867	S	T73T	SNP_silent	Spike	S:T73T	C21781T
EPI_ISL_434806	21784	T	A	21784	29903	S	N74K	SNP	Spike	S:N74K	T21784A
EPI_ISL_435057	21784	T	A	21828	30093	S	N74K	SNP	Spike	S:N74K	T21784A
EPI_ISL_442077	21784	T	C	21730	29782	S	N74N	SNP_silent	Spike	S:N74N	T21784C
EPI_ISL_443318	21784	T	C	21728	29847	S	N74N	SNP_silent	Spike	S:N74N	T21784C
EPI_ISL_443409	21784	T	C	21730	29782	S	N74N	SNP_silent	Spike	S:N74N	T21784C
EPI_ISL_443510	21784	T	C	21730	29782	S	N74N	SNP_silent	Spike	S:N74N	T21784C
EPI_ISL_457581	21784	T	C	21784	29903	S	N74N	SNP_silent	Spike	S:N74N	T21784C
EPI_ISL_457620	21784	T	C	21784	29903	S	N74N	SNP_silent	Spike	S:N74N	T21784C
EPI_ISL_462018	21784	T	C	21784	29903	S	N74N	SNP_silent	Spike	S:N74N	T21784C
EPI_ISL_462036	21784	T	C	21784	29903	S	N74N	SNP_silent	Spike	S:N74N	T21784C
EPI_ISL_465182	21784	T	C	21784	29903	S	N74N	SNP_silent	Spike	S:N74N	T21784C
EPI_ISL_465183	21784	T	C	21784	29903	S	N74N	SNP_silent	Spike	S:N74N	T21784C
EPI_ISL_465184	21784	T	C	21784	29903	S	N74N	SNP_silent	Spike	S:N74N	T21784C
EPI_ISL_450506	21784	T	A	21784	29903	S	N74K	SNP	Spike	S:N74K	T21784A
EPI_ISL_452172	21785	G	C	21785	29903	S	G75R	SNP	Spike	S:G75R	G21785C
EPI_ISL_420125	21786	G	A	21732	29782	S	G75D	SNP	Spike	S:G75D	G21786A
EPI_ISL_434371	21786	G	A	21786	29903	S	G75D	SNP	Spike	S:G75D	G21786A
EPI_ISL_436409	21786	G	A	21741	29796	S	G75D	SNP	Spike	S:G75D	G21786A
EPI_ISL_446631	21786	G	T	21784	29901	S	G75V	SNP	Spike	S:G75V	G21786T
EPI_ISL_452465	21786	G	A	21786	29903	S	G75D	SNP	Spike	S:G75D	G21786A
EPI_ISL_455725	21786	G	A	21748	29798	S	G75D	SNP	Spike	S:G75D	G21786A
EPI_ISL_458272	21786	G	T	21786	29903	S	G75V	SNP	Spike	S:G75V	G21786T
EPI_ISL_461035	21786	G	T	21732	29775	S	G75V	SNP	Spike	S:G75V	G21786T
EPI_ISL_461036	21786	G	T	21732	29775	S	G75V	SNP	Spike	S:G75V	G21786T
EPI_ISL_461037	21786	G	T	21732	29775	S	G75V	SNP	Spike	S:G75V	G21786T
EPI_ISL_461039	21786	G	T	21732	29775	S	G75V	SNP	Spike	S:G75V	G21786T
EPI_ISL_462254	21786	G	A	21732	29782	S	G75D	SNP	Spike	S:G75D	G21786A
EPI_ISL_463947	21786	G	A	21786	29903	S	G75D	SNP	Spike	S:G75D	G21786A
EPI_ISL_465510	21786	G	T	21786	29903	S	G75V	SNP	Spike	S:G75V	G21786T
EPI_ISL_468877	21786	G	A	21786	29903	S	G75D	SNP	Spike	S:G75D	G21786A
EPI_ISL_474914	21786	G	A	21786	29903	S	G75D	SNP	Spike	S:G75D	G21786A
EPI_ISL_425731	21786	G	T	21732	29782	S	G75V	SNP	Spike	S:G75V	G21786T
EPI_ISL_465163	21787	T	C	21787	29881	S	G75G	SNP_silent	Spike	S:G75G	T21787C
EPI_ISL_462398	21789	C	T	21789	29891	S	T76I	SNP	Spike	S:T76I	C21789T
EPI_ISL_437319	21789	C	T	21783	29891	S	T76I	SNP	Spike	S:T76I	C21789T
EPI_ISL_437325	21789	C	T	21783	29888	S	T76I	SNP	Spike	S:T76I	C21789T
EPI_ISL_439685	21789	C	T	21789	29903	S	T76I	SNP	Spike	S:T76I	C21789T
EPI_ISL_440861	21789	C	T	21789	29903	S	T76I	SNP	Spike	S:T76I	C21789T
EPI_ISL_440867	21789	C	T	21789	29903	S	T76I	SNP	Spike	S:T76I	C21789T
EPI_ISL_456225	21789	C	T	21789	29903	S	T76I	SNP	Spike	S:T76I	C21789T
EPI_ISL_457264	21789	C	T	21789	29891	S	T76I	SNP	Spike	S:T76I	C21789T
EPI_ISL_466649	21789	C	T	21789	29883	S	T76I	SNP	Spike	S:T76I	C21789T
EPI_ISL_471774	21789	C	T	21789	29903	S	T76I	SNP	Spike	S:T76I	C21789T
EPI_ISL_441860	21789	C	T	21786	29900	S	T76I	SNP	Spike	S:T76I	C21789T
EPI_ISL_472907	21789	C	T	21751	29865	S	T76I	SNP	Spike	S:T76I	C21789T
EPI_ISL_421786	21789	C	T	21786	29900	S	T76I	SNP	Spike	S:T76I	C21789T
EPI_ISL_423910	21789	C	T	21786	29900	S	T76I	SNP	Spike	S:T76I	C21789T
EPI_ISL_423945	21789	C	T	21786	29900	S	T76I	SNP	Spike	S:T76I	C21789T
EPI_ISL_461670	21789	C	T	21732	29779	S	T76I	SNP	Spike	S:T76I	C21789T
EPI_ISL_462298	21789	C	T	21789	29891	S	T76I	SNP	Spike	S:T76I	C21789T
EPI_ISL_462334	21789	C	T	21789	29891	S	T76I	SNP	Spike	S:T76I	C21789T
EPI_ISL_462349	21789	C	T	21789	29891	S	T76I	SNP	Spike	S:T76I	C21789T
EPI_ISL_417270	21789	C	T	21789	29903	S	T76I	SNP	Spike	S:T76I	C21789T
EPI_ISL_419969	21789	C	T	21777	29891	S	T76I	SNP	Spike	S:T76I	C21789T
EPI_ISL_467143	21789	C	T	21789	29903	S	T76I	SNP	Spike	S:T76I	C21789T
EPI_ISL_467201	21789	C	T	21789	29903	S	T76I	SNP	Spike	S:T76I	C21789T
EPI_ISL_467253	21789	C	T	21789	29903	S	T76I	SNP	Spike	S:T76I	C21789T
EPI_ISL_435283	21789	C	T	21789	29923	S	T76I	SNP	Spike	S:T76I	C21789T
EPI_ISL_454825	21790	T	C	21765	29834	S	T76T	SNP_silent	Spike	S:T76T	T21790C
EPI_ISL_436450	21792	A	T	21792	29889	S	K77M	SNP	Spike	S:K77M	A21792T
EPI_ISL_427244	21792	A	G	21767	29890	S	K77R	SNP	Spike	S:K77R	A21792G
EPI_ISL_447858	21792	A	T	21754	29822	S	K77M	SNP	Spike	S:K77M	A21792T
EPI_ISL_458072	21792	A	T	21762	29839	S	K77M	SNP	Spike	S:K77M	A21792T
EPI_ISL_471585	21792	A	T	21763	29840	S	K77M	SNP	Spike	S:K77M	A21792T
EPI_ISL_435075	21792	A	T	21792	29866	S	K77M	SNP	Spike	S:K77M	A21792T
EPI_ISL_436419	21792	A	T	21792	29869	S	K77M	SNP	Spike	S:K77M	A21792T
EPI_ISL_447556	21792	A	T	21775	29851	S	K77M	SNP	Spike	S:K77M	A21792T
EPI_ISL_447566	21792	A	T	21765	29876	S	K77M	SNP	Spike	S:K77M	A21792T
EPI_ISL_447571	21792	A	T	21754	29865	S	K77M	SNP	Spike	S:K77M	A21792T
EPI_ISL_447850	21792	A	T	21754	29822	S	K77M	SNP	Spike	S:K77M	A21792T
EPI_ISL_447856	21792	A	T	21754	29822	S	K77M	SNP	Spike	S:K77M	A21792T
EPI_ISL_450330	21792	A	T	21763	29830	S	K77M	SNP	Spike	S:K77M	A21792T
EPI_ISL_418634	21793	G	T	21739	29782	S	K77N	SNP	Spike	S:K77N	G21793T
EPI_ISL_443254	21793	G	C	21739	29782	S	K77N	SNP	Spike	S:K77N	G21793C
EPI_ISL_447136	21793	G	T	21793	29903	S	K77N	SNP	Spike	S:K77N	G21793T
EPI_ISL_462895	21793	G	C	21755	29822	S	K77N	SNP	Spike	S:K77N	G21793C
EPI_ISL_465593	21794	A	G	21794	29903	S	R78G	SNP	Spike	S:R78G	A21794G
EPI_ISL_444484	21795	G	T	21795	29903	S	R78M	SNP	Spike	S:R78M	G21795T
EPI_ISL_444485	21795	G	T	21795	29903	S	R78M	SNP	Spike	S:R78M	G21795T
EPI_ISL_447534	21795	G	T	21795	29903	S	R78M	SNP	Spike	S:R78M	G21795T
EPI_ISL_447535	21795	G	T	21795	29903	S	R78M	SNP	Spike	S:R78M	G21795T
EPI_ISL_447537	21795	G	T	21795	29903	S	R78M	SNP	Spike	S:R78M	G21795T
EPI_ISL_447540	21795	G	T	21795	29903	S	R78M	SNP	Spike	S:R78M	G21795T
EPI_ISL_447541	21795	G	T	21795	29903	S	R78M	SNP	Spike	S:R78M	G21795T
EPI_ISL_447542	21795	G	T	21795	29903	S	R78M	SNP	Spike	S:R78M	G21795T
EPI_ISL_447543	21795	G	T	21795	29903	S	R78M	SNP	Spike	S:R78M	G21795T
EPI_ISL_450783	21795	G	T	21795	29903	S	R78M	SNP	Spike	S:R78M	G21795T
EPI_ISL_419738	21795	G	A	21757	29865	S	R78K	SNP	Spike	S:R78K	G21795A
EPI_ISL_419744	21795	G	A	21780	29888	S	R78K	SNP	Spike	S:R78K	G21795A
EPI_ISL_456168	21795	G	A	21795	29903	S	R78K	SNP	Spike	S:R78K	G21795A
EPI_ISL_436105	21797	T	A	21794	29911	S	F79I	SNP	Spike	S:F79I	T21797A
EPI_ISL_454825	21797	T	C	21772	29834	S	F79L	SNP	Spike	S:F79L	T21797C
EPI_ISL_427244	21798	.	A	21774	29890	S	F79	insertion_frameshift	Spike	S:F79	.21798A
EPI_ISL_436105	21799	T	A	21796	29911	S	F79L	SNP	Spike	S:F79L	T21799A
EPI_ISL_424296	21800	G	T	21778	29853	S	D80Y	SNP	Spike	S:D80Y	G21800T
EPI_ISL_418284	21800	G	T	21800	29903	S	D80Y	SNP	Spike	S:D80Y	G21800T
EPI_ISL_427244	21800	G	C	21776	29890	S	D80H	SNP	Spike	S:D80H	G21800C
EPI_ISL_429129	21800	G	T	21791	29894	S	D80Y	SNP	Spike	S:D80Y	G21800T
EPI_ISL_442173	21800	G	T	21746	29849	S	D80Y	SNP	Spike	S:D80Y	G21800T
EPI_ISL_442536	21800	G	T	21746	29849	S	D80Y	SNP	Spike	S:D80Y	G21800T
EPI_ISL_450080	21800	G	A	21738	29717	S	D80N	SNP	Spike	S:D80N	G21800A
EPI_ISL_459416	21800	G	T	21746	29782	S	D80Y	SNP	Spike	S:D80Y	G21800T
EPI_ISL_461293	21800	G	T	21746	29775	S	D80Y	SNP	Spike	S:D80Y	G21800T
EPI_ISL_461297	21800	G	T	21746	29775	S	D80Y	SNP	Spike	S:D80Y	G21800T
EPI_ISL_464030	21800	G	A	21800	29903	S	D80N	SNP	Spike	S:D80N	G21800A
EPI_ISL_464061	21800	G	A	21800	29903	S	D80N	SNP	Spike	S:D80N	G21800A
EPI_ISL_470497	21800	G	T	21746	29782	S	D80Y	SNP	Spike	S:D80Y	G21800T
EPI_ISL_422397	21800	G	T	21746	29827	S	D80Y	SNP	Spike	S:D80Y	G21800T
EPI_ISL_421934	21800	G	T	21800	29903	S	D80Y	SNP	Spike	S:D80Y	G21800T
EPI_ISL_438284	21800	G	T	21746	29849	S	D80Y	SNP	Spike	S:D80Y	G21800T
EPI_ISL_438421	21800	G	T	21798	29834	S	D80Y	SNP	Spike	S:D80Y	G21800T
EPI_ISL_441656	21800	G	T	21746	29849	S	D80Y	SNP	Spike	S:D80Y	G21800T
EPI_ISL_442048	21800	G	T	21746	29782	S	D80Y	SNP	Spike	S:D80Y	G21800T
EPI_ISL_470220	21800	G	T	21746	29782	S	D80Y	SNP	Spike	S:D80Y	G21800T
EPI_ISL_427252	21800	G	T	21791	29853	S	D80Y	SNP	Spike	S:D80Y	G21800T
EPI_ISL_446067	21800	G	T	21793	29896	S	D80Y	SNP	Spike	S:D80Y	G21800T
EPI_ISL_457657	21800	G	T	21797	29900	S	D80Y	SNP	Spike	S:D80Y	G21800T
EPI_ISL_425358	21800	G	T	21800	29903	S	D80Y	SNP	Spike	S:D80Y	G21800T
EPI_ISL_466492	21800	G	T	21800	29903	S	D80Y	SNP	Spike	S:D80Y	G21800T
EPI_ISL_466493	21800	G	T	21800	29903	S	D80Y	SNP	Spike	S:D80Y	G21800T
EPI_ISL_466498	21800	G	T	21800	29903	S	D80Y	SNP	Spike	S:D80Y	G21800T
EPI_ISL_466561	21800	G	T	21800	29903	S	D80Y	SNP	Spike	S:D80Y	G21800T
EPI_ISL_466568	21800	G	T	21800	29903	S	D80Y	SNP	Spike	S:D80Y	G21800T
EPI_ISL_466592	21800	G	T	21800	29903	S	D80Y	SNP	Spike	S:D80Y	G21800T
[truncated: 50,205 more rows]
