# Supplementary material for: Rational Primer and Probe Construction in PCR-Based Assays for the Efficient Diagnosis of Drifting Variants of SARS-CoV-2
Source: Adv Virol. 2022 May 13;2022:2965666. doi: 10.1155/2022/2965666 (PMC9122727; doi:10.1155/2022/2965666)
Supplement: Supplementary Materials — Supplementary 1: Multiple sequence alignment (MUSCLE) data/diagram of the entire N gene among analyzed 8 coronavirus sequences (NCBI GenBank IDs) by MEGA11 version 0.1 and is presented. Supplementary 2:: Original raw file downloaded from [15]. It contains all the records of mutations in SARS-CoV-2 genomes studied. Supplementary 3, 4, 5, 6, and 7: spreadsheet files for mutation analyses for NSP12ab, S, E, M, and N genes of SARS-CoV-2 genome, respectively, and are available on request. [file 2965666.f1.zip › 2965666.f1/Supplementery 5 (1).txt]

sample	refpos	refvar	qvar	qpos	qlength	protein	variant	varclass	annotation	varname	varclade
EPI_ISL_465545	26248	T	C	26248	29903	E	Y2H	SNP	Envelope	E:Y2H	T26248C
EPI_ISL_417287	26256	C	T	26256	29903	E	F4F	SNP_silent	Envelope	E:F4F	C26256T
EPI_ISL_421562	26256	C	T	26245	29892	E	F4F	SNP_silent	Envelope	E:F4F	C26256T
EPI_ISL_422134	26256	C	T	26245	29892	E	F4F	SNP_silent	Envelope	E:F4F	C26256T
EPI_ISL_422421	26256	C	T	26256	29870	E	F4F	SNP_silent	Envelope	E:F4F	C26256T
EPI_ISL_424099	26256	C	T	26256	29903	E	F4F	SNP_silent	Envelope	E:F4F	C26256T
EPI_ISL_429735	26256	C	T	26256	29860	E	F4F	SNP_silent	Envelope	E:F4F	C26256T
EPI_ISL_430039	26256	C	T	26216	29863	E	F4F	SNP_silent	Envelope	E:F4F	C26256T
EPI_ISL_430051	26256	C	T	26244	29891	E	F4F	SNP_silent	Envelope	E:F4F	C26256T
EPI_ISL_430057	26256	C	T	26217	29864	E	F4F	SNP_silent	Envelope	E:F4F	C26256T
EPI_ISL_430058	26256	C	T	26217	29864	E	F4F	SNP_silent	Envelope	E:F4F	C26256T
EPI_ISL_432035	26256	C	T	26251	29898	E	F4F	SNP_silent	Envelope	E:F4F	C26256T
EPI_ISL_432265	26256	C	T	26248	29895	E	F4F	SNP_silent	Envelope	E:F4F	C26256T
EPI_ISL_435365	26256	C	T	26245	29892	E	F4F	SNP_silent	Envelope	E:F4F	C26256T
EPI_ISL_435372	26256	C	T	26248	29895	E	F4F	SNP_silent	Envelope	E:F4F	C26256T
EPI_ISL_436922	26256	C	T	26239	29886	E	F4F	SNP_silent	Envelope	E:F4F	C26256T
EPI_ISL_436923	26256	C	T	26252	29899	E	F4F	SNP_silent	Envelope	E:F4F	C26256T
EPI_ISL_436924	26256	C	T	26216	29863	E	F4F	SNP_silent	Envelope	E:F4F	C26256T
EPI_ISL_436932	26256	C	T	26216	29863	E	F4F	SNP_silent	Envelope	E:F4F	C26256T
EPI_ISL_436934	26256	C	T	26244	29891	E	F4F	SNP_silent	Envelope	E:F4F	C26256T
EPI_ISL_436935	26256	C	T	26254	29901	E	F4F	SNP_silent	Envelope	E:F4F	C26256T
EPI_ISL_436938	26256	C	T	26253	29900	E	F4F	SNP_silent	Envelope	E:F4F	C26256T
EPI_ISL_437308	26256	C	T	26250	29897	E	F4F	SNP_silent	Envelope	E:F4F	C26256T
EPI_ISL_437326	26256	C	T	26250	29889	E	F4F	SNP_silent	Envelope	E:F4F	C26256T
EPI_ISL_446252	26256	C	T	26245	29892	E	F4F	SNP_silent	Envelope	E:F4F	C26256T
EPI_ISL_446478	26256	C	T	26246	29893	E	F4F	SNP_silent	Envelope	E:F4F	C26256T
EPI_ISL_449817	26256	C	T	26256	29903	E	F4F	SNP_silent	Envelope	E:F4F	C26256T
EPI_ISL_449818	26256	C	T	26256	29903	E	F4F	SNP_silent	Envelope	E:F4F	C26256T
EPI_ISL_449821	26256	C	T	26256	29903	E	F4F	SNP_silent	Envelope	E:F4F	C26256T
EPI_ISL_450543	26256	C	T	26250	29897	E	F4F	SNP_silent	Envelope	E:F4F	C26256T
EPI_ISL_450546	26256	C	T	26245	29892	E	F4F	SNP_silent	Envelope	E:F4F	C26256T
EPI_ISL_450547	26256	C	T	26241	29888	E	F4F	SNP_silent	Envelope	E:F4F	C26256T
EPI_ISL_456657	26256	C	T	26256	29903	E	F4F	SNP_silent	Envelope	E:F4F	C26256T
EPI_ISL_456658	26256	C	T	26256	29903	E	F4F	SNP_silent	Envelope	E:F4F	C26256T
EPI_ISL_458148	26256	C	T	26256	29903	E	F4F	SNP_silent	Envelope	E:F4F	C26256T
EPI_ISL_458901	26256	C	T	26202	29782	E	F4F	SNP_silent	Envelope	E:F4F	C26256T
EPI_ISL_458972	26256	C	T	26202	29782	E	F4F	SNP_silent	Envelope	E:F4F	C26256T
EPI_ISL_465540	26256	C	T	26256	29903	E	F4F	SNP_silent	Envelope	E:F4F	C26256T
EPI_ISL_465650	26256	C	T	26256	29903	E	F4F	SNP_silent	Envelope	E:F4F	C26256T
EPI_ISL_467647	26256	C	T	26256	29903	E	F4F	SNP_silent	Envelope	E:F4F	C26256T
EPI_ISL_468542	26256	C	T	26256	29903	E	F4F	SNP_silent	Envelope	E:F4F	C26256T
EPI_ISL_470545	26256	C	T	26220	29867	E	F4F	SNP_silent	Envelope	E:F4F	C26256T
EPI_ISL_470547	26256	C	T	26209	29856	E	F4F	SNP_silent	Envelope	E:F4F	C26256T
EPI_ISL_470548	26256	C	T	26253	29855	E	F4F	SNP_silent	Envelope	E:F4F	C26256T
EPI_ISL_470549	26256	C	T	26247	29894	E	F4F	SNP_silent	Envelope	E:F4F	C26256T
EPI_ISL_470550	26256	C	T	26247	29894	E	F4F	SNP_silent	Envelope	E:F4F	C26256T
EPI_ISL_470551	26256	C	T	26253	29900	E	F4F	SNP_silent	Envelope	E:F4F	C26256T
EPI_ISL_470552	26256	C	T	26256	29903	E	F4F	SNP_silent	Envelope	E:F4F	C26256T
EPI_ISL_470565	26256	C	T	26256	29903	E	F4F	SNP_silent	Envelope	E:F4F	C26256T
EPI_ISL_470567	26256	C	T	26256	29858	E	F4F	SNP_silent	Envelope	E:F4F	C26256T
EPI_ISL_470669	26256	C	T	26256	29903	E	F4F	SNP_silent	Envelope	E:F4F	C26256T
EPI_ISL_470671	26256	C	T	26248	29895	E	F4F	SNP_silent	Envelope	E:F4F	C26256T
EPI_ISL_470673	26256	C	T	26256	29903	E	F4F	SNP_silent	Envelope	E:F4F	C26256T
EPI_ISL_470675	26256	C	T	26219	29866	E	F4F	SNP_silent	Envelope	E:F4F	C26256T
EPI_ISL_470677	26256	C	T	26252	29899	E	F4F	SNP_silent	Envelope	E:F4F	C26256T
EPI_ISL_470682	26256	C	T	26226	29827	E	F4F	SNP_silent	Envelope	E:F4F	C26256T
EPI_ISL_470684	26256	C	T	26256	29888	E	F4F	SNP_silent	Envelope	E:F4F	C26256T
EPI_ISL_470685	26256	C	T	26254	29863	E	F4F	SNP_silent	Envelope	E:F4F	C26256T
EPI_ISL_470686	26256	C	T	26254	29860	E	F4F	SNP_silent	Envelope	E:F4F	C26256T
EPI_ISL_470689	26256	C	T	26220	29842	E	F4F	SNP_silent	Envelope	E:F4F	C26256T
EPI_ISL_470690	26256	C	T	26225	29872	E	F4F	SNP_silent	Envelope	E:F4F	C26256T
EPI_ISL_470691	26256	C	T	26248	29895	E	F4F	SNP_silent	Envelope	E:F4F	C26256T
EPI_ISL_470693	26256	C	T	26220	29830	E	F4F	SNP_silent	Envelope	E:F4F	C26256T
EPI_ISL_470694	26256	C	T	26255	29902	E	F4F	SNP_silent	Envelope	E:F4F	C26256T
EPI_ISL_470698	26256	C	T	26226	29873	E	F4F	SNP_silent	Envelope	E:F4F	C26256T
EPI_ISL_470700	26256	C	T	26253	29855	E	F4F	SNP_silent	Envelope	E:F4F	C26256T
EPI_ISL_470701	26256	C	T	26239	29842	E	F4F	SNP_silent	Envelope	E:F4F	C26256T
EPI_ISL_470702	26256	C	T	26220	29867	E	F4F	SNP_silent	Envelope	E:F4F	C26256T
EPI_ISL_470703	26256	C	T	26252	29857	E	F4F	SNP_silent	Envelope	E:F4F	C26256T
EPI_ISL_470705	26256	C	T	26256	29903	E	F4F	SNP_silent	Envelope	E:F4F	C26256T
EPI_ISL_470706	26256	C	T	26252	29897	E	F4F	SNP_silent	Envelope	E:F4F	C26256T
EPI_ISL_470708	26256	C	T	26249	29853	E	F4F	SNP_silent	Envelope	E:F4F	C26256T
EPI_ISL_470709	26256	C	T	26219	29866	E	F4F	SNP_silent	Envelope	E:F4F	C26256T
EPI_ISL_470720	26256	C	T	26220	29867	E	F4F	SNP_silent	Envelope	E:F4F	C26256T
EPI_ISL_470729	26256	C	T	26220	29867	E	F4F	SNP_silent	Envelope	E:F4F	C26256T
EPI_ISL_470730	26256	C	T	26226	29873	E	F4F	SNP_silent	Envelope	E:F4F	C26256T
EPI_ISL_470731	26256	C	T	26219	29866	E	F4F	SNP_silent	Envelope	E:F4F	C26256T
EPI_ISL_470732	26256	C	T	26252	29899	E	F4F	SNP_silent	Envelope	E:F4F	C26256T
EPI_ISL_470744	26256	C	T	26245	29892	E	F4F	SNP_silent	Envelope	E:F4F	C26256T
EPI_ISL_471631	26256	C	T	26223	29833	E	F4F	SNP_silent	Envelope	E:F4F	C26256T
EPI_ISL_471637	26256	C	T	26223	29833	E	F4F	SNP_silent	Envelope	E:F4F	C26256T
EPI_ISL_472608	26256	C	T	26256	29903	E	F4F	SNP_silent	Envelope	E:F4F	C26256T
EPI_ISL_441241	26256	C	T	26199	29846	E	F4F	SNP_silent	Envelope	E:F4F	C26256T
EPI_ISL_467115	26256	C	A	26256	29903	E	F4L	SNP	Envelope	E:F4L	C26256A
EPI_ISL_440794	26256	C	T	26202	29793	E	F4F	SNP_silent	Envelope	E:F4F	C26256T
EPI_ISL_457169	26256	C	T	26256	29903	E	F4F	SNP_silent	Envelope	E:F4F	C26256T
EPI_ISL_446481	26257	G	A	26219	29865	E	V5I	SNP	Envelope	E:V5I	G26257A
EPI_ISL_469223	26257	G	A	26257	29903	E	V5I	SNP	Envelope	E:V5I	G26257A
EPI_ISL_469220	26257	G	A	26257	29903	E	V5I	SNP	Envelope	E:V5I	G26257A
EPI_ISL_413015	26261	C	T	26240	29880	E	S6L	SNP	Envelope	E:S6L	C26261T
EPI_ISL_420057	26262	G	A	26262	29882	E	S6S	SNP_silent	Envelope	E:S6S	G26262A
EPI_ISL_437382	26262	G	A	26257	29851	E	S6S	SNP_silent	Envelope	E:S6S	G26262A
EPI_ISL_437383	26262	G	A	26246	29850	E	S6S	SNP_silent	Envelope	E:S6S	G26262A
EPI_ISL_458481	26262	G	T	26208	29782	E	S6S	SNP_silent	Envelope	E:S6S	G26262T
EPI_ISL_469064	26262	G	A	26262	29903	E	S6S	SNP_silent	Envelope	E:S6S	G26262A
EPI_ISL_439658	26262	G	A	26205	29776	E	S6S	SNP_silent	Envelope	E:S6S	G26262A
EPI_ISL_432315	26262	G	A	26257	29898	E	S6S	SNP_silent	Envelope	E:S6S	G26262A
EPI_ISL_472681	26262	G	A	26255	29896	E	S6S	SNP_silent	Envelope	E:S6S	G26262A
EPI_ISL_474354	26262	G	A	26257	29898	E	S6S	SNP_silent	Envelope	E:S6S	G26262A
EPI_ISL_468761	26262	G	A	26262	29903	E	S6S	SNP_silent	Envelope	E:S6S	G26262A
EPI_ISL_475007	26263	G	A	26263	29903	E	E7K	SNP	Envelope	E:E7K	G26263A
EPI_ISL_450832	26263	G	A	26263	29903	E	E7K	SNP	Envelope	E:E7K	G26263A
EPI_ISL_430203	26263	G	C	26263	29903	E	E7Q	SNP	Envelope	E:E7Q	G26263C
EPI_ISL_437203	26265	A	T	26265	29903	E	E7D	SNP	Envelope	E:E7D	A26265T
EPI_ISL_430016	26266	G	A	25998	29406	E	E8K	SNP	Envelope	E:E8K	G26266A
EPI_ISL_467653	26267	A	G	26267	29903	E	E8G	SNP	Envelope	E:E8G	A26267G
EPI_ISL_433649	26270	C	T	26216	29782	E	T9I	SNP	Envelope	E:T9I	C26270T
EPI_ISL_434357	26270	C	T	26270	29903	E	T9I	SNP	Envelope	E:T9I	C26270T
EPI_ISL_438999	26270	C	T	26216	29782	E	T9I	SNP	Envelope	E:T9I	C26270T
EPI_ISL_446956	26270	C	T	26268	29901	E	T9I	SNP	Envelope	E:T9I	C26270T
EPI_ISL_448069	26270	C	T	26270	29903	E	T9I	SNP	Envelope	E:T9I	C26270T
EPI_ISL_448380	26270	C	T	26240	29873	E	T9I	SNP	Envelope	E:T9I	C26270T
EPI_ISL_448387	26270	C	T	26240	29873	E	T9I	SNP	Envelope	E:T9I	C26270T
EPI_ISL_452080	26270	C	T	26270	29903	E	T9I	SNP	Envelope	E:T9I	C26270T
EPI_ISL_453076	26270	C	T	26216	29782	E	T9I	SNP	Envelope	E:T9I	C26270T
EPI_ISL_456775	26270	C	T	26216	29782	E	T9I	SNP	Envelope	E:T9I	C26270T
EPI_ISL_457354	26270	C	T	26259	29892	E	T9I	SNP	Envelope	E:T9I	C26270T
EPI_ISL_457355	26270	C	T	26232	29865	E	T9I	SNP	Envelope	E:T9I	C26270T
EPI_ISL_457356	26270	C	T	26270	29903	E	T9I	SNP	Envelope	E:T9I	C26270T
EPI_ISL_457466	26270	C	T	26240	29873	E	T9I	SNP	Envelope	E:T9I	C26270T
EPI_ISL_459159	26270	C	T	26216	29782	E	T9I	SNP	Envelope	E:T9I	C26270T
EPI_ISL_461860	26270	C	T	26239	29872	E	T9I	SNP	Envelope	E:T9I	C26270T
EPI_ISL_467007	26270	C	T	26270	29903	E	T9I	SNP	Envelope	E:T9I	C26270T
EPI_ISL_468243	26270	C	T	26270	29903	E	T9I	SNP	Envelope	E:T9I	C26270T
EPI_ISL_468360	26270	C	T	26232	29824	E	T9I	SNP	Envelope	E:T9I	C26270T
EPI_ISL_470018	26270	C	T	26216	29782	E	T9I	SNP	Envelope	E:T9I	C26270T
EPI_ISL_471556	26270	C	T	26270	29890	E	T9I	SNP	Envelope	E:T9I	C26270T
EPI_ISL_473482	26270	C	T	26270	29903	E	T9I	SNP	Envelope	E:T9I	C26270T
EPI_ISL_455031	26270	C	T	26004	29408	E	T9I	SNP	Envelope	E:T9I	C26270T
EPI_ISL_438999	26272	G	T	26218	29782	E	G10C	SNP	Envelope	E:G10C	G26272T
EPI_ISL_441590	26273	G	T	26219	29782	E	G10V	SNP	Envelope	E:G10V	G26273T
EPI_ISL_414543	26274	T	C	26217	29772	E	G10G	SNP_silent	Envelope	E:G10G	T26274C
EPI_ISL_471903	26280	A	G	26280	29895	E	L12L	SNP_silent	Envelope	E:L12L	A26280G
EPI_ISL_425977	26281	A	G	26281	29903	E	I13V	SNP	Envelope	E:I13V	A26281G
EPI_ISL_467353	26286	T	C	26247	29741	E	V14V	SNP_silent	Envelope	E:V14V	T26286C
EPI_ISL_471402	26286	T	C	26248	29799	E	V14V	SNP_silent	Envelope	E:V14V	T26286C
EPI_ISL_452505	26291	G	A	26291	29903	E	S16N	SNP	Envelope	E:S16N	G26291A
EPI_ISL_453325	26291	G	A	26287	29862	E	S16N	SNP	Envelope	E:S16N	G26291A
EPI_ISL_458767	26291	G	A	26237	29782	E	S16N	SNP	Envelope	E:S16N	G26291A
EPI_ISL_458834	26291	G	A	26237	29782	E	S16N	SNP	Envelope	E:S16N	G26291A
EPI_ISL_474574	26292	C	T	26290	29901	E	S16S	SNP_silent	Envelope	E:S16S	C26292T
EPI_ISL_456403	26292	C	T	26292	29903	E	S16S	SNP_silent	Envelope	E:S16S	C26292T
EPI_ISL_456457	26292	C	T	26292	29897	E	S16S	SNP_silent	Envelope	E:S16S	C26292T
EPI_ISL_456631	26292	C	T	26292	29897	E	S16S	SNP_silent	Envelope	E:S16S	C26292T
EPI_ISL_424602	26294	T	C	26294	29903	E	V17A	SNP	Envelope	E:V17A	T26294C
EPI_ISL_452699	26296	C	T	26296	29903	E	L18F	SNP	Envelope	E:L18F	C26296T
EPI_ISL_452766	26296	C	T	26296	29903	E	L18F	SNP	Envelope	E:L18F	C26296T
EPI_ISL_446774	26299	CT	TC	26299	29903	E	L19S	SNP	Envelope	E:L19S	CT26299TC
EPI_ISL_469242	26299	C	T	26275	29879	E	L19F	SNP	Envelope	E:L19F	C26299T
EPI_ISL_462753	26300	T	C	26294	29834	E	L19P	SNP	Envelope	E:L19P	T26300C
EPI_ISL_421178	26301	T	G	26247	29782	E	L19L	SNP_silent	Envelope	E:L19L	T26301G
EPI_ISL_452477	26301	T	G	26301	29903	E	L19L	SNP_silent	Envelope	E:L19L	T26301G
EPI_ISL_452595	26301	T	G	26301	29903	E	L19L	SNP_silent	Envelope	E:L19L	T26301G
EPI_ISL_452636	26301	T	G	26301	29903	E	L19L	SNP_silent	Envelope	E:L19L	T26301G
EPI_ISL_452663	26301	T	G	26301	29903	E	L19L	SNP_silent	Envelope	E:L19L	T26301G
EPI_ISL_454223	26301	T	G	26261	29763	E	L19L	SNP_silent	Envelope	E:L19L	T26301G
EPI_ISL_454224	26301	T	G	26261	29763	E	L19L	SNP_silent	Envelope	E:L19L	T26301G
EPI_ISL_462446	26301	T	G	26301	29903	E	L19L	SNP_silent	Envelope	E:L19L	T26301G
EPI_ISL_468828	26301	T	G	26301	29903	E	L19L	SNP_silent	Envelope	E:L19L	T26301G
EPI_ISL_468990	26301	T	G	26301	29903	E	L19L	SNP_silent	Envelope	E:L19L	T26301G
EPI_ISL_474894	26301	T	G	26301	29903	E	L19L	SNP_silent	Envelope	E:L19L	T26301G
EPI_ISL_474935	26301	T	G	26301	29903	E	L19L	SNP_silent	Envelope	E:L19L	T26301G
EPI_ISL_422334	26301	T	G	26292	29894	E	L19L	SNP_silent	Envelope	E:L19L	T26301G
EPI_ISL_423045	26301	T	C	26301	29903	E	L19L	SNP_silent	Envelope	E:L19L	T26301C
EPI_ISL_423341	26301	T	C	26301	29903	E	L19L	SNP_silent	Envelope	E:L19L	T26301C
EPI_ISL_423343	26301	T	C	26301	29903	E	L19L	SNP_silent	Envelope	E:L19L	T26301C
EPI_ISL_423604	26301	T	C	26301	29903	E	L19L	SNP_silent	Envelope	E:L19L	T26301C
EPI_ISL_423812	26301	T	C	26301	29903	E	L19L	SNP_silent	Envelope	E:L19L	T26301C
EPI_ISL_429422	26305	C	T	26305	29903	E	L21F	SNP	Envelope	E:L21F	C26305T
EPI_ISL_440390	26305	C	T	26251	29782	E	L21F	SNP	Envelope	E:L21F	C26305T
EPI_ISL_442118	26305	C	T	26251	29849	E	L21F	SNP	Envelope	E:L21F	C26305T
EPI_ISL_468791	26305	C	T	26305	29903	E	L21F	SNP	Envelope	E:L21F	C26305T
EPI_ISL_470259	26305	C	T	26251	29782	E	L21F	SNP	Envelope	E:L21F	C26305T
EPI_ISL_440172	26305	C	T	26251	29782	E	L21F	SNP	Envelope	E:L21F	C26305T
EPI_ISL_440667	26305	C	T	26251	29782	E	L21F	SNP	Envelope	E:L21F	C26305T
EPI_ISL_458343	26305	C	T	26251	29782	E	L21F	SNP	Envelope	E:L21F	C26305T
EPI_ISL_440098	26305	C	T	26251	29797	E	L21F	SNP	Envelope	E:L21F	C26305T
EPI_ISL_440196	26305	C	T	26251	29837	E	L21F	SNP	Envelope	E:L21F	C26305T
EPI_ISL_441024	26307	T	A	26307	29903	E	L21L	SNP_silent	Envelope	E:L21L	T26307A
EPI_ISL_424606	26308	G	T	26308	29903	E	A22S	SNP	Envelope	E:A22S	G26308T
EPI_ISL_461412	26313	C	T	26309	29877	E	F23F	SNP_silent	Envelope	E:F23F	C26313T
EPI_ISL_418653	26313	C	T	26259	29782	E	F23F	SNP_silent	Envelope	E:F23F	C26313T
EPI_ISL_436856	26313	C	T	26313	29872	E	F23F	SNP_silent	Envelope	E:F23F	C26313T
EPI_ISL_445837	26313	C	T	26305	29895	E	F23F	SNP_silent	Envelope	E:F23F	C26313T
EPI_ISL_446495	26313	C	T	26298	29888	E	F23F	SNP_silent	Envelope	E:F23F	C26313T
EPI_ISL_446674	26313	C	T	26275	29865	E	F23F	SNP_silent	Envelope	E:F23F	C26313T
EPI_ISL_454325	26313	C	T	26273	29763	E	F23F	SNP_silent	Envelope	E:F23F	C26313T
EPI_ISL_454352	26313	C	T	26273	29763	E	F23F	SNP_silent	Envelope	E:F23F	C26313T
EPI_ISL_454766	26313	C	T	26308	29862	E	F23F	SNP_silent	Envelope	E:F23F	C26313T
EPI_ISL_454769	26313	C	T	26307	29891	E	F23F	SNP_silent	Envelope	E:F23F	C26313T
EPI_ISL_454774	26313	C	T	26307	29847	E	F23F	SNP_silent	Envelope	E:F23F	C26313T
EPI_ISL_455226	26313	C	T	26259	29775	E	F23F	SNP_silent	Envelope	E:F23F	C26313T
EPI_ISL_455227	26313	C	T	26259	29775	E	F23F	SNP_silent	Envelope	E:F23F	C26313T
EPI_ISL_455228	26313	C	T	26259	29775	E	F23F	SNP_silent	Envelope	E:F23F	C26313T
EPI_ISL_455230	26313	C	T	26259	29775	E	F23F	SNP_silent	Envelope	E:F23F	C26313T
EPI_ISL_455231	26313	C	T	26259	29775	E	F23F	SNP_silent	Envelope	E:F23F	C26313T
EPI_ISL_455232	26313	C	T	26259	29775	E	F23F	SNP_silent	Envelope	E:F23F	C26313T
EPI_ISL_455233	26313	C	T	26259	29775	E	F23F	SNP_silent	Envelope	E:F23F	C26313T
EPI_ISL_455234	26313	C	T	26259	29775	E	F23F	SNP_silent	Envelope	E:F23F	C26313T
EPI_ISL_455237	26313	C	T	26259	29775	E	F23F	SNP_silent	Envelope	E:F23F	C26313T
EPI_ISL_455238	26313	C	T	26259	29775	E	F23F	SNP_silent	Envelope	E:F23F	C26313T
EPI_ISL_455239	26313	C	T	26259	29775	E	F23F	SNP_silent	Envelope	E:F23F	C26313T
EPI_ISL_460848	26313	C	T	26259	29775	E	F23F	SNP_silent	Envelope	E:F23F	C26313T
EPI_ISL_463912	26313	C	T	26304	29894	E	F23F	SNP_silent	Envelope	E:F23F	C26313T
EPI_ISL_463959	26313	C	T	26301	29891	E	F23F	SNP_silent	Envelope	E:F23F	C26313T
EPI_ISL_463962	26313	C	T	26304	29894	E	F23F	SNP_silent	Envelope	E:F23F	C26313T
EPI_ISL_467869	26313	C	T	26259	29782	E	F23F	SNP_silent	Envelope	E:F23F	C26313T
EPI_ISL_472744	26313	C	T	26277	29867	E	F23F	SNP_silent	Envelope	E:F23F	C26313T
EPI_ISL_468159	26313	C	T	26298	29876	E	F23F	SNP_silent	Envelope	E:F23F	C26313T
EPI_ISL_463586	26313	C	T	26313	29903	E	F23F	SNP_silent	Envelope	E:F23F	C26313T
EPI_ISL_427007	26313	C	T	26313	29903	E	F23F	SNP_silent	Envelope	E:F23F	C26313T
EPI_ISL_468163	26313	C	T	26303	29881	E	F23F	SNP_silent	Envelope	E:F23F	C26313T
EPI_ISL_422937	26314	G	T	26260	29775	E	V24L	SNP	Envelope	E:V24L	G26314T
EPI_ISL_433959	26314	G	A	26314	29903	E	V24M	SNP	Envelope	E:V24M	G26314A
EPI_ISL_439659	26314	G	A	26260	29849	E	V24M	SNP	Envelope	E:V24M	G26314A
EPI_ISL_444413	26314	G	A	26314	29903	E	V24M	SNP	Envelope	E:V24M	G26314A
EPI_ISL_448035	26314	G	A	26314	29903	E	V24M	SNP	Envelope	E:V24M	G26314A
EPI_ISL_448056	26314	G	A	26314	29903	E	V24M	SNP	Envelope	E:V24M	G26314A
EPI_ISL_448196	26314	G	A	26260	29782	E	V24M	SNP	Envelope	E:V24M	G26314A
EPI_ISL_452929	26314	G	A	26314	29903	E	V24M	SNP	Envelope	E:V24M	G26314A
EPI_ISL_459276	26314	G	A	26260	29782	E	V24M	SNP	Envelope	E:V24M	G26314A
EPI_ISL_459284	26314	G	A	26260	29782	E	V24M	SNP	Envelope	E:V24M	G26314A
EPI_ISL_459318	26314	G	A	26260	29782	E	V24M	SNP	Envelope	E:V24M	G26314A
EPI_ISL_470160	26314	G	A	26260	29782	E	V24M	SNP	Envelope	E:V24M	G26314A
EPI_ISL_420160	26314	G	A	26311	29900	E	V24M	SNP	Envelope	E:V24M	G26314A
EPI_ISL_432770	26314	G	A	26311	29900	E	V24M	SNP	Envelope	E:V24M	G26314A
EPI_ISL_432773	26314	G	A	26311	29900	E	V24M	SNP	Envelope	E:V24M	G26314A
EPI_ISL_432862	26314	G	A	26311	29900	E	V24M	SNP	Envelope	E:V24M	G26314A
EPI_ISL_441910	26314	G	A	26311	29900	E	V24M	SNP	Envelope	E:V24M	G26314A
EPI_ISL_441911	26314	G	A	26311	29900	E	V24M	SNP	Envelope	E:V24M	G26314A
EPI_ISL_442034	26314	G	A	26311	29900	E	V24M	SNP	Envelope	E:V24M	G26314A
EPI_ISL_442039	26314	G	A	26311	29900	E	V24M	SNP	Envelope	E:V24M	G26314A
EPI_ISL_442511	26314	G	A	26311	29900	E	V24M	SNP	Envelope	E:V24M	G26314A
EPI_ISL_441112	26314	G	C	26260	29849	E	V24L	SNP	Envelope	E:V24L	G26314C
EPI_ISL_440330	26314	G	A	26260	29849	E	V24M	SNP	Envelope	E:V24M	G26314A
EPI_ISL_467135	26314	G	A	26314	29903	E	V24M	SNP	Envelope	E:V24M	G26314A
EPI_ISL_468766	26314	G	T	26314	29903	E	V24L	SNP	Envelope	E:V24L	G26314T
EPI_ISL_472629	26315	T	C	26280	29868	E	V24A	SNP	Envelope	E:V24A	T26315C
EPI_ISL_467242	26318	T	C	26318	29903	E	V25A	SNP	Envelope	E:V25A	T26318C
EPI_ISL_440468	26318	T	C	26318	29903	E	V25A	SNP	Envelope	E:V25A	T26318C
EPI_ISL_442349	26318	T	C	26318	29903	E	V25A	SNP	Envelope	E:V25A	T26318C
EPI_ISL_464858	26318	T	C	26318	29903	E	V25A	SNP	Envelope	E:V25A	T26318C
EPI_ISL_465314	26319	A	T	26319	29903	E	V25V	SNP_silent	Envelope	E:V25V	A26319T
EPI_ISL_447581	26319	A	G	26270	29854	E	V25V	SNP_silent	Envelope	E:V25V	A26319G
EPI_ISL_421875	26319	A	T	26319	29903	E	V25V	SNP_silent	Envelope	E:V25V	A26319T
EPI_ISL_423151	26319	A	T	26319	29903	E	V25V	SNP_silent	Envelope	E:V25V	A26319T
EPI_ISL_423192	26319	A	T	26319	29903	E	V25V	SNP_silent	Envelope	E:V25V	A26319T
EPI_ISL_423706	26319	A	T	26319	29903	E	V25V	SNP_silent	Envelope	E:V25V	A26319T
EPI_ISL_424006	26319	A	T	26319	29903	E	V25V	SNP_silent	Envelope	E:V25V	A26319T
EPI_ISL_424007	26319	A	T	26319	29903	E	V25V	SNP_silent	Envelope	E:V25V	A26319T
EPI_ISL_424013	26319	A	T	26319	29903	E	V25V	SNP_silent	Envelope	E:V25V	A26319T
EPI_ISL_441755	26319	A	T	26265	29782	E	V25V	SNP_silent	Envelope	E:V25V	A26319T
EPI_ISL_466008	26319	A	T	26319	29903	E	V25V	SNP_silent	Envelope	E:V25V	A26319T
EPI_ISL_423688	26319	A	T	26319	29903	E	V25V	SNP_silent	Envelope	E:V25V	A26319T
EPI_ISL_451597	26319	A	G	26053	29408	E	V25V	SNP_silent	Envelope	E:V25V	A26319G
EPI_ISL_455082	26319	A	G	26053	29408	E	V25V	SNP_silent	Envelope	E:V25V	A26319G
EPI_ISL_423689	26319	A	T	26319	29903	E	V25V	SNP_silent	Envelope	E:V25V	A26319T
EPI_ISL_436948	26320	T	C	26320	29903	E	F26L	SNP	Envelope	E:F26L	T26320C
EPI_ISL_450174	26320	T	C	26320	29903	E	F26L	SNP	Envelope	E:F26L	T26320C
EPI_ISL_463294	26320	T	C	26320	29903	E	F26L	SNP	Envelope	E:F26L	T26320C
EPI_ISL_474728	26320	T	C	26287	29870	E	F26L	SNP	Envelope	E:F26L	T26320C
EPI_ISL_463644	26322	C	T	26322	29903	E	F26F	SNP_silent	Envelope	E:F26F	C26322T
EPI_ISL_463670	26322	C	T	26322	29903	E	F26F	SNP_silent	Envelope	E:F26F	C26322T
EPI_ISL_463687	26322	C	T	26322	29903	E	F26F	SNP_silent	Envelope	E:F26F	C26322T
EPI_ISL_463893	26324	T	A	26263	29793	E	L27*	SNP_stop	Envelope	E:L27*	T26324A
EPI_ISL_447596	26324	T	C	26310	29765	E	L27S	SNP	Envelope	E:L27S	T26324C
EPI_ISL_439629	26325	G	T	26268	29779	E	L27F	SNP	Envelope	E:L27F	G26325T
EPI_ISL_441084	26325	G	T	26268	29809	E	L27F	SNP	Envelope	E:L27F	G26325T
EPI_ISL_432600	26325	G	A	26322	29900	E	L27L	SNP_silent	Envelope	E:L27L	G26325A
EPI_ISL_416397	26326	C	T	26295	29835	E	L27L	SNP_silent	Envelope	E:L27L	C26326T
EPI_ISL_472104	26326	C	A	26326	29903	E	L28I	SNP	Envelope	E:L28I	C26326A
EPI_ISL_413612	26326	C	T	26326	29882	E	L27L	SNP_silent	Envelope	E:L27L	C26326T
EPI_ISL_413611	26326	C	T	26326	29882	E	L27L	SNP_silent	Envelope	E:L27L	C26326T
EPI_ISL_415539	26326	C	T	26326	29903	E	L27L	SNP_silent	Envelope	E:L27L	C26326T
EPI_ISL_454537	26327	.	A	26328	29903	E	L28	insertion_frameshift	Envelope	E:L28	.26327A
EPI_ISL_454569	26330	T	G	26330	29903	E	V29G	SNP	Envelope	E:V29G	T26330G
EPI_ISL_455373	26330	T	C	26329	29902	E	V29A	SNP	Envelope	E:V29A	T26330C
EPI_ISL_472732	26331	T	C	26331	29901	E	V29V	SNP_silent	Envelope	E:V29V	T26331C
EPI_ISL_473130	26331	T	C	26320	29890	E	V29V	SNP_silent	Envelope	E:V29V	T26331C
EPI_ISL_473275	26331	T	C	26299	29869	E	V29V	SNP_silent	Envelope	E:V29V	T26331C
EPI_ISL_440645	26332	A	G	26278	29782	E	T30A	SNP	Envelope	E:T30A	A26332G
EPI_ISL_440676	26332	A	G	26278	29782	E	T30A	SNP	Envelope	E:T30A	A26332G
EPI_ISL_440758	26332	A	G	26278	29782	E	T30A	SNP	Envelope	E:T30A	A26332G
EPI_ISL_440795	26332	A	G	26278	29782	E	T30A	SNP	Envelope	E:T30A	A26332G
EPI_ISL_440802	26332	A	G	26278	29782	E	T30A	SNP	Envelope	E:T30A	A26332G
EPI_ISL_458307	26332	A	G	26278	29781	E	T30A	SNP	Envelope	E:T30A	A26332G
EPI_ISL_469731	26332	A	G	26278	29783	E	T30A	SNP	Envelope	E:T30A	A26332G
EPI_ISL_454537	26332	A	.	26332	29903	E	V29	deletion_frameshift	Envelope	E:V29	A26332.
EPI_ISL_416354	26333	C	T	26301	29834	E	T30I	SNP	Envelope	E:T30I	C26333T
EPI_ISL_435409	26333	C	T	26333	29903	E	T30I	SNP	Envelope	E:T30I	C26333T
EPI_ISL_456723	26333	C	T	26333	29903	E	T30I	SNP	Envelope	E:T30I	C26333T
EPI_ISL_457319	26333	C	T	26333	29903	E	T30I	SNP	Envelope	E:T30I	C26333T
EPI_ISL_457505	26333	C	T	26303	29873	E	T30I	SNP	Envelope	E:T30I	C26333T
EPI_ISL_458303	26333	C	T	26279	29782	E	T30I	SNP	Envelope	E:T30I	C26333T
EPI_ISL_468717	26333	C	T	26333	29903	E	T30I	SNP	Envelope	E:T30I	C26333T
EPI_ISL_469580	26333	C	T	26279	29782	E	T30I	SNP	Envelope	E:T30I	C26333T
EPI_ISL_474824	26333	C	T	26333	29903	E	T30I	SNP	Envelope	E:T30I	C26333T
EPI_ISL_451364	26333	C	T	26293	29863	E	T30I	SNP	Envelope	E:T30I	C26333T
EPI_ISL_461256	26333	C	T	26267	29763	E	T30I	SNP	Envelope	E:T30I	C26333T
EPI_ISL_472124	26333	C	T	26327	29897	E	T30I	SNP	Envelope	E:T30I	C26333T
EPI_ISL_457437	26333	C	T	26296	29866	E	T30I	SNP	Envelope	E:T30I	C26333T
EPI_ISL_453181	26333	C	T	26333	29903	E	T30I	SNP	Envelope	E:T30I	C26333T
EPI_ISL_458913	26333	C	T	26276	29779	E	T30I	SNP	Envelope	E:T30I	C26333T
EPI_ISL_473439	26333	C	T	26330	29900	E	T30I	SNP	Envelope	E:T30I	C26333T
EPI_ISL_437759	26333	C	T	26333	29903	E	T30I	SNP	Envelope	E:T30I	C26333T
EPI_ISL_437760	26333	C	T	26333	29903	E	T30I	SNP	Envelope	E:T30I	C26333T
EPI_ISL_421944	26333	C	T	26333	29903	E	T30I	SNP	Envelope	E:T30I	C26333T
EPI_ISL_454564	26336	T	C	26336	29903	E	L31P	SNP	Envelope	E:L31P	T26336C
EPI_ISL_454531	26338	G	T	26338	29903	E	A32S	SNP	Envelope	E:A32S	G26338T
EPI_ISL_454536	26338	G	T	26338	29903	E	A32S	SNP	Envelope	E:A32S	G26338T
EPI_ISL_429218	26340	C	T	26334	29897	E	A32A	SNP_silent	Envelope	E:A32A	C26340T
EPI_ISL_429219	26340	C	T	26329	29892	E	A32A	SNP_silent	Envelope	E:A32A	C26340T
EPI_ISL_443327	26340	C	T	26286	29849	E	A32A	SNP_silent	Envelope	E:A32A	C26340T
EPI_ISL_466933	26340	C	T	26340	29903	E	A32A	SNP_silent	Envelope	E:A32A	C26340T
EPI_ISL_473009	26340	C	T	26337	29900	E	A32A	SNP_silent	Envelope	E:A32A	C26340T
EPI_ISL_451364	26340	C	T	26300	29863	E	A32A	SNP_silent	Envelope	E:A32A	C26340T
EPI_ISL_429865	26340	C	T	26075	29638	E	A32A	SNP_silent	Envelope	E:A32A	C26340T
EPI_ISL_424643	26340	C	T	26340	29903	E	A32A	SNP_silent	Envelope	E:A32A	C26340T
EPI_ISL_424646	26340	C	T	26340	29903	E	A32A	SNP_silent	Envelope	E:A32A	C26340T
EPI_ISL_424651	26340	C	T	26340	29903	E	A32A	SNP_silent	Envelope	E:A32A	C26340T
EPI_ISL_429731	26340	C	T	26340	29854	E	A32A	SNP_silent	Envelope	E:A32A	C26340T
EPI_ISL_447127	26340	C	T	26340	29903	E	A32A	SNP_silent	Envelope	E:A32A	C26340T
EPI_ISL_447137	26340	C	T	26340	29903	E	A32A	SNP_silent	Envelope	E:A32A	C26340T
EPI_ISL_447138	26340	C	T	26340	29903	E	A32A	SNP_silent	Envelope	E:A32A	C26340T
EPI_ISL_447139	26340	C	T	26340	29897	E	A32A	SNP_silent	Envelope	E:A32A	C26340T
EPI_ISL_462151	26340	C	T	26286	29782	E	A32A	SNP_silent	Envelope	E:A32A	C26340T
EPI_ISL_462152	26340	C	T	26286	29782	E	A32A	SNP_silent	Envelope	E:A32A	C26340T
EPI_ISL_462153	26340	C	T	26286	29782	E	A32A	SNP_silent	Envelope	E:A32A	C26340T
EPI_ISL_462154	26340	C	T	26286	29782	E	A32A	SNP_silent	Envelope	E:A32A	C26340T
EPI_ISL_462155	26340	C	T	26286	29782	E	A32A	SNP_silent	Envelope	E:A32A	C26340T
EPI_ISL_462156	26340	C	T	26286	29782	E	A32A	SNP_silent	Envelope	E:A32A	C26340T
EPI_ISL_462157	26340	C	T	26286	29782	E	A32A	SNP_silent	Envelope	E:A32A	C26340T
EPI_ISL_420174	26340	C	T	26340	29903	E	A32A	SNP_silent	Envelope	E:A32A	C26340T
EPI_ISL_420222	26340	C	T	26340	29903	E	A32A	SNP_silent	Envelope	E:A32A	C26340T
EPI_ISL_420231	26340	C	T	26340	29903	E	A32A	SNP_silent	Envelope	E:A32A	C26340T
EPI_ISL_420235	26340	C	T	26340	29903	E	A32A	SNP_silent	Envelope	E:A32A	C26340T
EPI_ISL_420269	26340	C	T	26340	29903	E	A32A	SNP_silent	Envelope	E:A32A	C26340T
EPI_ISL_432471	26340	C	T	26340	29903	E	A32A	SNP_silent	Envelope	E:A32A	C26340T
EPI_ISL_432750	26340	C	T	26340	29903	E	A32A	SNP_silent	Envelope	E:A32A	C26340T
EPI_ISL_432760	26340	C	T	26340	29903	E	A32A	SNP_silent	Envelope	E:A32A	C26340T
EPI_ISL_442443	26340	C	T	26340	29903	E	A32A	SNP_silent	Envelope	E:A32A	C26340T
EPI_ISL_442489	26340	C	T	26340	29903	E	A32A	SNP_silent	Envelope	E:A32A	C26340T
EPI_ISL_448887	26340	C	T	26340	29903	E	A32A	SNP_silent	Envelope	E:A32A	C26340T
EPI_ISL_457601	26340	C	T	26340	29903	E	A32A	SNP_silent	Envelope	E:A32A	C26340T
EPI_ISL_462061	26340	C	T	26340	29903	E	A32A	SNP_silent	Envelope	E:A32A	C26340T
EPI_ISL_427127	26340	C	T	26337	29900	E	A32A	SNP_silent	Envelope	E:A32A	C26340T
EPI_ISL_442776	26340	C	T	26283	29840	E	A32A	SNP_silent	Envelope	E:A32A	C26340T
EPI_ISL_470154	26340	C	T	26286	29782	E	A32A	SNP_silent	Envelope	E:A32A	C26340T
EPI_ISL_456608	26340	C	T	26340	29903	E	A32A	SNP_silent	Envelope	E:A32A	C26340T
EPI_ISL_413752	26344	CTTACTGCGCTTCGATTGTGTGCG	.	25963	29358	E	L34	deletion	Envelope	E:L34	CTTACTGCGCTTCGATTGTGTGCG26344.
EPI_ISL_455404	26344	C	T	26310	29869	E	L34F	SNP	Envelope	E:L34F	C26344T
EPI_ISL_452206	26350	GCGCTTCGATTGTGTGCGTACTGCTGCAATATTGTTAACGTG	.	26324	29758	E	A36	deletion	Envelope	E:A36	GCGCTTCGATTGTGTGCGTACTGCTGCAATATTGTTAACGTG26350.
EPI_ISL_452194	26351	CGCTTC	.	26319	29793	E	A36	deletion	Envelope	E:A36	CGCTTC26351.
EPI_ISL_452199	26351	CGCTTC	.	26325	29799	E	A36	deletion	Envelope	E:A36	CGCTTC26351.
EPI_ISL_452200	26351	CGCTTC	.	26325	29799	E	A36	deletion	Envelope	E:A36	CGCTTC26351.
EPI_ISL_460939	26351	C	T	26297	29775	E	A36V	SNP	Envelope	E:A36V	C26351T
EPI_ISL_426464	26351	C	T	26345	29851	E	A36V	SNP	Envelope	E:A36V	C26351T
EPI_ISL_452204	26351	CGCTTC	.	26325	29799	E	A36	deletion	Envelope	E:A36	CGCTTC26351.
EPI_ISL_422839	26353	C	T	26299	29775	E	L37F	SNP	Envelope	E:L37F	C26353T
EPI_ISL_471231	26353	C	T	26299	29782	E	L37F	SNP	Envelope	E:L37F	C26353T
EPI_ISL_418874	26354	T	G	25905	29454	E	L37R	SNP	Envelope	E:L37R	T26354G
EPI_ISL_461529	26354	T	A	26354	29903	E	L37H	SNP	Envelope	E:L37H	T26354A
EPI_ISL_411929	26354	T	A	26354	29903	E	L37H	SNP	Envelope	E:L37H	T26354A
EPI_ISL_454560	26356	C	A	26356	29903	E	L37L	SNP_silent	Envelope	E:L37L	C26356A
EPI_ISL_454569	26356	C	T	26356	29903	E	R38*	SNP_stop	Envelope	E:R38*	C26356T
EPI_ISL_454554	26356	C	G	26356	29903	E	R38G	SNP	Envelope	E:R38G	C26356G
EPI_ISL_427291	26358	ATTGTGTGCGTACT	.	25748	29279	E	R38	deletion_frameshift	Envelope	E:R38	ATTGTGTGCGTACT26358.
EPI_ISL_428685	26359	TTGTGTGCGTACTGCTGCAATATTGTTAACGTGAGTCTT	.	26168	29525	E	L39	deletion	Envelope	E:L39	TTGTGTGCGTACTGCTGCAATATTGTTAACGTGAGTCTT26359.
EPI_ISL_437874	26359	T	A	26334	29818	E	L39M	SNP	Envelope	E:L39M	T26359A
EPI_ISL_454532	26361	G	A	26361	29903	E	L39L	SNP_silent	Envelope	E:L39L	G26361A
EPI_ISL_459869	26365	G	A	26341	29835	E	A41T	SNP	Envelope	E:A41T	G26365A
EPI_ISL_421001	26365	G	T	26328	29866	E	A41S	SNP	Envelope	E:A41S	G26365T
EPI_ISL_430150	26365	G	T	26365	29903	E	A41S	SNP	Envelope	E:A41S	G26365T
EPI_ISL_442779	26366	C	T	26364	29834	E	A41V	SNP	Envelope	E:A41V	C26366T
EPI_ISL_463648	26366	C	T	26366	29903	E	A41V	SNP	Envelope	E:A41V	C26366T
EPI_ISL_467299	26367	G	A	26366	29868	E	A41A	SNP_silent	Envelope	E:A41A	G26367A
EPI_ISL_428773	26370	C	T	26370	29903	E	Y42Y	SNP_silent	Envelope	E:Y42Y	C26370T
EPI_ISL_446538	26370	C	T	26363	29896	E	Y42Y	SNP_silent	Envelope	E:Y42Y	C26370T
EPI_ISL_457434	26370	C	T	26333	29866	E	Y42Y	SNP_silent	Envelope	E:Y42Y	C26370T
EPI_ISL_467299	26370	.	AG	26370	29868	E	Y42	insertion_frameshift	Envelope	E:Y42	.26370AG
EPI_ISL_420840	26370	C	T	26366	29711	E	Y42Y	SNP_silent	Envelope	E:Y42Y	C26370T
EPI_ISL_447916	26370	C	T	26370	29891	E	Y42Y	SNP_silent	Envelope	E:Y42Y	C26370T
EPI_ISL_454537	26370	C	T	26370	29903	E	Y42Y	SNP_silent	Envelope	E:Y42Y	C26370T
EPI_ISL_412459	26370	C	T	26359	29848	E	Y42Y	SNP_silent	Envelope	E:Y42Y	C26370T
EPI_ISL_451378	26370	C	T	26370	29903	E	Y42Y	SNP_silent	Envelope	E:Y42Y	C26370T
EPI_ISL_467299	26371	.	C	26373	29868	E	Y42	insertion_frameshift	Envelope	E:Y42	.26371C
EPI_ISL_463606	26373	C	T	26373	29903	E	C43C	SNP_silent	Envelope	E:C43C	C26373T
EPI_ISL_454564	26375	GC	AA	26375	29903	E	C44*	SNP_stop	Envelope	E:C44*	GC26375AA
EPI_ISL_467299	26375	G	A	26377	29868	E	C44Y	SNP	Envelope	E:C44Y	G26375A
EPI_ISL_454537	26375	GC	AA	26375	29903	E	C44*	SNP_stop	Envelope	E:C44*	GC26375AA
EPI_ISL_452466	26376	C	T	26376	29903	E	C44C	SNP_silent	Envelope	E:C44C	C26376T
EPI_ISL_452468	26376	C	T	26376	29903	E	C44C	SNP_silent	Envelope	E:C44C	C26376T
EPI_ISL_452469	26376	C	T	26376	29903	E	C44C	SNP_silent	Envelope	E:C44C	C26376T
EPI_ISL_467299	26378	AT	GG	26380	29868	E	N45R	SNP	Envelope	E:N45R	AT26378GG
EPI_ISL_436137	26382	T	A	26382	29903	E	I46I	SNP_silent	Envelope	E:I46I	T26382A
EPI_ISL_466625	26383	G	T	26383	29903	E	V47F	SNP	Envelope	E:V47F	G26383T
EPI_ISL_467299	26384	TT	GC	26386	29868	E	V47G	SNP	Envelope	E:V47G	TT26384GC
EPI_ISL_453664	26387	A	G	26387	29903	E	N48S	SNP	Envelope	E:N48S	A26387G
EPI_ISL_461935	26387	A	G	26387	29903	E	N48S	SNP	Envelope	E:N48S	A26387G
EPI_ISL_442787	26388	C	T	26334	29782	E	N48N	SNP_silent	Envelope	E:N48N	C26388T
EPI_ISL_427287	26389	G	T	26335	29782	E	V49L	SNP	Envelope	E:V49L	G26389T
EPI_ISL_434917	26389	G	T	26389	29903	E	V49L	SNP	Envelope	E:V49L	G26389T
EPI_ISL_446763	26389	G	T	26351	29865	E	V49L	SNP	Envelope	E:V49L	G26389T
EPI_ISL_460056	26389	G	T	26385	29849	E	V49L	SNP	Envelope	E:V49L	G26389T
EPI_ISL_474560	26389	G	T	26386	29837	E	V49L	SNP	Envelope	E:V49L	G26389T
EPI_ISL_418303	26392	A	G	26392	29903	E	S50G	SNP	Envelope	E:S50G	A26392G
EPI_ISL_452206	26393	GTCTT	.	26325	29758	E	S50	deletion_frameshift	Envelope	E:S50	GTCTT26393.
EPI_ISL_417413	26396	T	A	26396	29903	E	L51H	SNP	Envelope	E:L51H	T26396A
EPI_ISL_419999	26398	G	A	26396	29901	E	V52I	SNP	Envelope	E:V52I	G26398A
EPI_ISL_446191	26398	G	T	26365	29870	E	V52L	SNP	Envelope	E:V52L	G26398T
EPI_ISL_429674	26399	T	A	26280	29571	E	V52E	SNP	Envelope	E:V52E	T26399A
EPI_ISL_415618	26403	AC	CG	26325	29825	E	KP53NA	SNP	Envelope	E:KP53NA	AC26403CG
EPI_ISL_451330	26404	C	T	26395	29894	E	P54S	SNP	Envelope	E:P54S	C26404T
EPI_ISL_460840	26408	C	T	26354	29775	E	S55F	SNP	Envelope	E:S55F	C26408T
EPI_ISL_460986	26408	C	T	26354	29775	E	S55F	SNP	Envelope	E:S55F	C26408T
EPI_ISL_460990	26408	C	T	26354	29775	E	S55F	SNP	Envelope	E:S55F	C26408T
EPI_ISL_461246	26408	C	T	26354	29775	E	S55F	SNP	Envelope	E:S55F	C26408T
EPI_ISL_422718	26408	C	T	26354	29775	E	S55F	SNP	Envelope	E:S55F	C26408T
EPI_ISL_432699	26408	C	T	26408	29903	E	S55F	SNP	Envelope	E:S55F	C26408T
EPI_ISL_434267	26408	C	T	26408	29903	E	S55F	SNP	Envelope	E:S55F	C26408T
EPI_ISL_441590	26408	C	T	26354	29782	E	S55F	SNP	Envelope	E:S55F	C26408T
EPI_ISL_454092	26408	C	T	26368	29763	E	S55F	SNP	Envelope	E:S55F	C26408T
EPI_ISL_454103	26408	C	T	26368	29636	E	S55F	SNP	Envelope	E:S55F	C26408T
EPI_ISL_458689	26408	C	T	26354	29782	E	S55F	SNP	Envelope	E:S55F	C26408T
EPI_ISL_460839	26408	C	T	26354	29775	E	S55F	SNP	Envelope	E:S55F	C26408T
EPI_ISL_460841	26408	C	T	26354	29775	E	S55F	SNP	Envelope	E:S55F	C26408T
EPI_ISL_460976	26408	C	T	26354	29775	E	S55F	SNP	Envelope	E:S55F	C26408T
EPI_ISL_460977	26408	C	T	26354	29775	E	S55F	SNP	Envelope	E:S55F	C26408T
EPI_ISL_460978	26408	C	T	26354	29775	E	S55F	SNP	Envelope	E:S55F	C26408T
EPI_ISL_460979	26408	C	T	26354	29775	E	S55F	SNP	Envelope	E:S55F	C26408T
EPI_ISL_460980	26408	C	T	26354	29775	E	S55F	SNP	Envelope	E:S55F	C26408T
EPI_ISL_460981	26408	C	T	26354	29775	E	S55F	SNP	Envelope	E:S55F	C26408T
EPI_ISL_460982	26408	C	T	26354	29775	E	S55F	SNP	Envelope	E:S55F	C26408T
EPI_ISL_460983	26408	C	T	26354	29775	E	S55F	SNP	Envelope	E:S55F	C26408T
EPI_ISL_460984	26408	C	T	26354	29775	E	S55F	SNP	Envelope	E:S55F	C26408T
EPI_ISL_460985	26408	C	T	26354	29775	E	S55F	SNP	Envelope	E:S55F	C26408T
EPI_ISL_460987	26408	C	T	26354	29775	E	S55F	SNP	Envelope	E:S55F	C26408T
EPI_ISL_460988	26408	C	T	26342	29763	E	S55F	SNP	Envelope	E:S55F	C26408T
EPI_ISL_460989	26408	C	T	26354	29775	E	S55F	SNP	Envelope	E:S55F	C26408T
EPI_ISL_460991	26408	C	T	26354	29775	E	S55F	SNP	Envelope	E:S55F	C26408T
EPI_ISL_460992	26408	C	T	26354	29775	E	S55F	SNP	Envelope	E:S55F	C26408T
EPI_ISL_461065	26408	C	T	26354	29775	E	S55F	SNP	Envelope	E:S55F	C26408T
EPI_ISL_461075	26408	C	T	26354	29775	E	S55F	SNP	Envelope	E:S55F	C26408T
EPI_ISL_461244	26408	C	T	26354	29775	E	S55F	SNP	Envelope	E:S55F	C26408T
EPI_ISL_461245	26408	C	T	26354	29775	E	S55F	SNP	Envelope	E:S55F	C26408T
EPI_ISL_424214	26408	C	T	26152	29647	E	S55F	SNP	Envelope	E:S55F	C26408T
EPI_ISL_472124	26408	C	T	26402	29897	E	S55F	SNP	Envelope	E:S55F	C26408T
EPI_ISL_445120	26409	T	C	26409	29903	E	S55S	SNP_silent	Envelope	E:S55S	T26409C
EPI_ISL_442518	26410	T	C	26410	29903	E	F56L	SNP	Envelope	E:F56L	T26410C
EPI_ISL_435057	26412	T	.	26451	30093	E	F56	deletion_frameshift	Envelope	E:F56	T26412.
EPI_ISL_432327	26415	C	T	26415	29903	E	Y57Y	SNP_silent	Envelope	E:Y57Y	C26415T
EPI_ISL_445878	26415	C	T	26415	29903	E	Y57Y	SNP_silent	Envelope	E:Y57Y	C26415T
EPI_ISL_474262	26415	C	T	26377	29865	E	Y57Y	SNP_silent	Envelope	E:Y57Y	C26415T
EPI_ISL_430814	26416	G	T	26370	29805	E	V58F	SNP	Envelope	E:V58F	G26416T
EPI_ISL_430815	26416	G	T	26368	29800	E	V58F	SNP	Envelope	E:V58F	G26416T
EPI_ISL_430817	26416	G	T	26369	29804	E	V58F	SNP	Envelope	E:V58F	G26416T
EPI_ISL_440029	26416	G	T	26362	29782	E	V58F	SNP	Envelope	E:V58F	G26416T
EPI_ISL_442661	26416	G	T	26414	29864	E	V58F	SNP	Envelope	E:V58F	G26416T
EPI_ISL_443791	26416	G	T	26362	29849	E	V58F	SNP	Envelope	E:V58F	G26416T
EPI_ISL_448504	26416	G	C	26416	29903	E	V58L	SNP	Envelope	E:V58L	G26416C
EPI_ISL_458317	26416	G	T	26362	29782	E	V58F	SNP	Envelope	E:V58F	G26416T
EPI_ISL_458722	26416	G	T	26362	29782	E	V58F	SNP	Envelope	E:V58F	G26416T
EPI_ISL_459074	26416	G	T	26362	29782	E	V58F	SNP	Envelope	E:V58F	G26416T
EPI_ISL_469694	26416	G	T	26362	29782	E	V58F	SNP	Envelope	E:V58F	G26416T
EPI_ISL_417285	26416	G	C	26413	29900	E	V58L	SNP	Envelope	E:V58L	G26416C
EPI_ISL_420640	26416	G	C	26413	29900	E	V58L	SNP	Envelope	E:V58L	G26416C
EPI_ISL_433819	26416	G	C	26413	29900	E	V58L	SNP	Envelope	E:V58L	G26416C
EPI_ISL_440669	26416	G	C	26359	29779	E	V58L	SNP	Envelope	E:V58L	G26416C
EPI_ISL_474925	26416	G	T	26416	29903	E	V58F	SNP	Envelope	E:V58F	G26416T
EPI_ISL_437847	26418	T	C	26249	29734	E	V58V	SNP_silent	Envelope	E:V58V	T26418C
EPI_ISL_461075	26419	T	C	26365	29775	E	Y59H	SNP	Envelope	E:Y59H	T26419C
EPI_ISL_451615	26419	T	C	26153	29408	E	Y59H	SNP	Envelope	E:Y59H	T26419C
EPI_ISL_472384	26426	G	A	26426	29901	E	R61H	SNP	Envelope	E:R61H	G26426A
EPI_ISL_432231	26426	G	A	26426	29903	E	R61H	SNP	Envelope	E:R61H	G26426A
EPI_ISL_440790	26426	G	A	26372	29782	E	R61H	SNP	Envelope	E:R61H	G26426A
EPI_ISL_443776	26426	G	A	26372	29782	E	R61H	SNP	Envelope	E:R61H	G26426A
EPI_ISL_443981	26426	G	A	26372	29846	E	R61H	SNP	Envelope	E:R61H	G26426A
EPI_ISL_422854	26428	G	T	26374	29775	E	V62F	SNP	Envelope	E:V62F	G26428T
EPI_ISL_461433	26428	G	T	26335	29769	E	V62F	SNP	Envelope	E:V62F	G26428T
EPI_ISL_469043	26428	G	T	26428	29903	E	V62F	SNP	Envelope	E:V62F	G26428T
EPI_ISL_418041	26433	A	G	26409	29879	E	K63K	SNP_silent	Envelope	E:K63K	A26433G
EPI_ISL_430944	26433	A	G	26408	29878	E	K63K	SNP_silent	Envelope	E:K63K	A26433G
EPI_ISL_419702	26433	A	G	26424	29903	E	K63K	SNP_silent	Envelope	E:K63K	A26433G
EPI_ISL_420573	26433	A	G	26424	29894	E	K63K	SNP_silent	Envelope	E:K63K	A26433G
EPI_ISL_421675	26433	A	G	26399	29830	E	K63K	SNP_silent	Envelope	E:K63K	A26433G
EPI_ISL_421728	26433	A	G	26424	29894	E	K63K	SNP_silent	Envelope	E:K63K	A26433G
EPI_ISL_426128	26433	A	G	26393	29859	E	K63K	SNP_silent	Envelope	E:K63K	A26433G
EPI_ISL_427592	26433	A	G	26424	29863	E	K63K	SNP_silent	Envelope	E:K63K	A26433G
EPI_ISL_427607	26433	A	G	26424	29864	E	K63K	SNP_silent	Envelope	E:K63K	A26433G
EPI_ISL_428772	26433	A	G	26424	29894	E	K63K	SNP_silent	Envelope	E:K63K	A26433G
EPI_ISL_429129	26433	A	G	26424	29894	E	K63K	SNP_silent	Envelope	E:K63K	A26433G
EPI_ISL_436079	26433	A	G	26424	29873	E	K63K	SNP_silent	Envelope	E:K63K	A26433G
EPI_ISL_444737	26433	A	G	26433	29903	E	K63K	SNP_silent	Envelope	E:K63K	A26433G
EPI_ISL_445035	26433	A	G	26400	29870	E	K63K	SNP_silent	Envelope	E:K63K	A26433G
EPI_ISL_445119	26433	A	G	26424	29894	E	K63K	SNP_silent	Envelope	E:K63K	A26433G
EPI_ISL_450768	26433	A	G	26387	29811	E	K63K	SNP_silent	Envelope	E:K63K	A26433G
EPI_ISL_450864	26433	A	G	26405	29839	E	K63K	SNP_silent	Envelope	E:K63K	A26433G
EPI_ISL_450865	26433	A	G	26367	29801	E	K63K	SNP_silent	Envelope	E:K63K	A26433G
EPI_ISL_451461	26433	A	G	26433	29903	E	K63K	SNP_silent	Envelope	E:K63K	A26433G
EPI_ISL_467820	26433	A	G	26370	29773	E	K63K	SNP_silent	Envelope	E:K63K	A26433G
EPI_ISL_467821	26433	A	G	26370	29773	E	K63K	SNP_silent	Envelope	E:K63K	A26433G
EPI_ISL_467882	26433	A	G	26370	29773	E	K63K	SNP_silent	Envelope	E:K63K	A26433G
EPI_ISL_470873	26433	A	G	26374	29797	E	K63K	SNP_silent	Envelope	E:K63K	A26433G
EPI_ISL_451533	26433	A	G	26158	29399	E	K63K	SNP_silent	Envelope	E:K63K	A26433G
EPI_ISL_438574	26433	A	G	26433	29903	E	K63K	SNP_silent	Envelope	E:K63K	A26433G
EPI_ISL_470122	26433	A	G	26379	29788	E	K63K	SNP_silent	Envelope	E:K63K	A26433G
EPI_ISL_470300	26433	A	G	26379	29782	E	K63K	SNP_silent	Envelope	E:K63K	A26433G
EPI_ISL_425207	26437	C	T	26383	29782	E	N64N	SNP_silent	Envelope	E:N64N	C26437T
EPI_ISL_436937	26437	C	T	26435	29901	E	N64N	SNP_silent	Envelope	E:N64N	C26437T
EPI_ISL_470670	26437	C	T	26437	29903	E	N64N	SNP_silent	Envelope	E:N64N	C26437T
EPI_ISL_436444	26437	C	A	26437	29866	E	L65M	SNP	Envelope	E:L65M	C26437A
EPI_ISL_467407	26438	T	C	26438	29903	E	L65P	SNP	Envelope	E:L65P	T26438C
EPI_ISL_422956	26439	G	T	26385	29775	E	L65L	SNP_silent	Envelope	E:L65L	G26439T
EPI_ISL_433704	26439	G	T	26439	29903	E	L65L	SNP_silent	Envelope	E:L65L	G26439T
EPI_ISL_439449	26439	G	T	26385	29849	E	L65L	SNP_silent	Envelope	E:L65L	G26439T
EPI_ISL_441661	26439	G	T	26385	29845	E	L65L	SNP_silent	Envelope	E:L65L	G26439T
EPI_ISL_443051	26439	G	T	26385	29849	E	L65L	SNP_silent	Envelope	E:L65L	G26439T
EPI_ISL_448020	26439	G	T	26433	29897	E	L65L	SNP_silent	Envelope	E:L65L	G26439T
EPI_ISL_452623	26439	G	A	26439	29903	E	L65L	SNP_silent	Envelope	E:L65L	G26439A
EPI_ISL_452643	26439	G	A	26439	29903	E	L65L	SNP_silent	Envelope	E:L65L	G26439A
EPI_ISL_461539	26439	G	T	26439	29903	E	L65L	SNP_silent	Envelope	E:L65L	G26439T
EPI_ISL_461542	26439	G	T	26439	29903	E	L65L	SNP_silent	Envelope	E:L65L	G26439T
EPI_ISL_468864	26439	G	A	26439	29903	E	L65L	SNP_silent	Envelope	E:L65L	G26439A
EPI_ISL_468916	26439	G	A	26439	29903	E	L65L	SNP_silent	Envelope	E:L65L	G26439A
EPI_ISL_468946	26439	G	A	26439	29903	E	L65L	SNP_silent	Envelope	E:L65L	G26439A
EPI_ISL_470366	26439	G	T	26385	29782	E	L65L	SNP_silent	Envelope	E:L65L	G26439T
EPI_ISL_473329	26439	G	T	26439	29903	E	L65L	SNP_silent	Envelope	E:L65L	G26439T
EPI_ISL_473338	26439	G	T	26439	29903	E	L65L	SNP_silent	Envelope	E:L65L	G26439T
EPI_ISL_473339	26439	G	T	26439	29903	E	L65L	SNP_silent	Envelope	E:L65L	G26439T
EPI_ISL_473345	26439	G	T	26439	29903	E	L65L	SNP_silent	Envelope	E:L65L	G26439T
EPI_ISL_473348	26439	G	T	26439	29903	E	L65L	SNP_silent	Envelope	E:L65L	G26439T
EPI_ISL_473354	26439	G	T	26439	29903	E	L65L	SNP_silent	Envelope	E:L65L	G26439T
EPI_ISL_473371	26439	G	T	26439	29903	E	L65L	SNP_silent	Envelope	E:L65L	G26439T
EPI_ISL_473373	26439	G	T	26439	29903	E	L65L	SNP_silent	Envelope	E:L65L	G26439T
EPI_ISL_473374	26439	G	T	26439	29903	E	L65L	SNP_silent	Envelope	E:L65L	G26439T
EPI_ISL_469346	26440	A	C	26386	29782	E	N66H	SNP	Envelope	E:N66H	A26440C
EPI_ISL_451561	26440	A	C	26174	29408	E	N66H	SNP	Envelope	E:N66H	A26440C
EPI_ISL_462896	26442	.	T	26406	29823	E	N66	insertion_frameshift	Envelope	E:N66	.26442T
EPI_ISL_439836	26447	C	T	26447	29903	E	S68F	SNP	Envelope	E:S68F	C26447T
EPI_ISL_419754	26447	C	T	26409	29865	E	S68F	SNP	Envelope	E:S68F	C26447T
EPI_ISL_422213	26447	C	A	26417	29873	E	S68Y	SNP	Envelope	E:S68Y	C26447A
EPI_ISL_428788	26447	C	T	26447	29903	E	S68F	SNP	Envelope	E:S68F	C26447T
EPI_ISL_430378	26447	C	T	26447	29903	E	S68F	SNP	Envelope	E:S68F	C26447T
EPI_ISL_432414	26447	C	A	26444	29900	E	S68Y	SNP	Envelope	E:S68Y	C26447A
EPI_ISL_434651	26447	C	T	26447	29903	E	S68F	SNP	Envelope	E:S68F	C26447T
EPI_ISL_443189	26447	C	T	26447	29891	E	S68F	SNP	Envelope	E:S68F	C26447T
EPI_ISL_445384	26447	C	A	26444	29900	E	S68Y	SNP	Envelope	E:S68Y	C26447A
EPI_ISL_448038	26447	C	T	26447	29903	E	S68F	SNP	Envelope	E:S68F	C26447T
EPI_ISL_448044	26447	C	T	26447	29903	E	S68F	SNP	Envelope	E:S68F	C26447T
EPI_ISL_448072	26447	C	T	26447	29903	E	S68F	SNP	Envelope	E:S68F	C26447T
EPI_ISL_448073	26447	C	T	26447	29903	E	S68F	SNP	Envelope	E:S68F	C26447T
EPI_ISL_448076	26447	C	T	26447	29903	E	S68F	SNP	Envelope	E:S68F	C26447T
EPI_ISL_448098	26447	C	T	26447	29903	E	S68F	SNP	Envelope	E:S68F	C26447T
EPI_ISL_448108	26447	C	T	26447	29903	E	S68F	SNP	Envelope	E:S68F	C26447T
EPI_ISL_448501	26447	C	T	26447	29903	E	S68F	SNP	Envelope	E:S68F	C26447T
EPI_ISL_448515	26447	C	T	26447	29903	E	S68F	SNP	Envelope	E:S68F	C26447T
EPI_ISL_448535	26447	C	T	26447	29903	E	S68F	SNP	Envelope	E:S68F	C26447T
EPI_ISL_450249	26447	C	T	26447	29903	E	S68F	SNP	Envelope	E:S68F	C26447T
EPI_ISL_450821	26447	C	T	26447	29903	E	S68F	SNP	Envelope	E:S68F	C26447T
EPI_ISL_450822	26447	C	T	26447	29903	E	S68F	SNP	Envelope	E:S68F	C26447T
EPI_ISL_450831	26447	C	T	26447	29903	E	S68F	SNP	Envelope	E:S68F	C26447T
EPI_ISL_452860	26447	C	T	26447	29903	E	S68F	SNP	Envelope	E:S68F	C26447T
EPI_ISL_452861	26447	C	T	26447	29903	E	S68F	SNP	Envelope	E:S68F	C26447T
EPI_ISL_452862	26447	C	T	26447	29903	E	S68F	SNP	Envelope	E:S68F	C26447T
EPI_ISL_452876	26447	C	T	26447	29903	E	S68F	SNP	Envelope	E:S68F	C26447T
EPI_ISL_452890	26447	C	T	26447	29903	E	S68F	SNP	Envelope	E:S68F	C26447T
EPI_ISL_452904	26447	C	T	26447	29903	E	S68F	SNP	Envelope	E:S68F	C26447T
EPI_ISL_452944	26447	C	T	26447	29903	E	S68F	SNP	Envelope	E:S68F	C26447T
EPI_ISL_452981	26447	C	T	26447	29903	E	S68F	SNP	Envelope	E:S68F	C26447T
EPI_ISL_452983	26447	C	T	26447	29903	E	S68F	SNP	Envelope	E:S68F	C26447T
EPI_ISL_452989	26447	C	T	26447	29903	E	S68F	SNP	Envelope	E:S68F	C26447T
EPI_ISL_456020	26447	C	T	26447	29903	E	S68F	SNP	Envelope	E:S68F	C26447T
EPI_ISL_456700	26447	C	T	26447	29903	E	S68F	SNP	Envelope	E:S68F	C26447T
EPI_ISL_456708	26447	C	T	26447	29903	E	S68F	SNP	Envelope	E:S68F	C26447T
EPI_ISL_456709	26447	C	T	26447	29903	E	S68F	SNP	Envelope	E:S68F	C26447T
EPI_ISL_456713	26447	C	T	26447	29903	E	S68F	SNP	Envelope	E:S68F	C26447T
EPI_ISL_457999	26447	C	T	26372	29728	E	S68F	SNP	Envelope	E:S68F	C26447T
EPI_ISL_458516	26447	C	T	26393	29782	E	S68F	SNP	Envelope	E:S68F	C26447T
EPI_ISL_458524	26447	C	T	26393	29782	E	S68F	SNP	Envelope	E:S68F	C26447T
EPI_ISL_458528	26447	C	T	26393	29782	E	S68F	SNP	Envelope	E:S68F	C26447T
EPI_ISL_458552	26447	C	T	26393	29782	E	S68F	SNP	Envelope	E:S68F	C26447T
EPI_ISL_458570	26447	C	T	26393	29782	E	S68F	SNP	Envelope	E:S68F	C26447T
EPI_ISL_458574	26447	C	T	26393	29782	E	S68F	SNP	Envelope	E:S68F	C26447T
EPI_ISL_459170	26447	C	T	26393	29782	E	S68F	SNP	Envelope	E:S68F	C26447T
EPI_ISL_459185	26447	C	T	26393	29783	E	S68F	SNP	Envelope	E:S68F	C26447T
EPI_ISL_459189	26447	C	T	26393	29782	E	S68F	SNP	Envelope	E:S68F	C26447T
EPI_ISL_459198	26447	C	T	26393	29782	E	S68F	SNP	Envelope	E:S68F	C26447T
EPI_ISL_459203	26447	C	T	26393	29782	E	S68F	SNP	Envelope	E:S68F	C26447T
EPI_ISL_459212	26447	C	T	26393	29782	E	S68F	SNP	Envelope	E:S68F	C26447T
EPI_ISL_459221	26447	C	T	26393	29782	E	S68F	SNP	Envelope	E:S68F	C26447T
EPI_ISL_459225	26447	C	T	26393	29783	E	S68F	SNP	Envelope	E:S68F	C26447T
EPI_ISL_459237	26447	C	T	26393	29782	E	S68F	SNP	Envelope	E:S68F	C26447T
EPI_ISL_459238	26447	C	T	26393	29782	E	S68F	SNP	Envelope	E:S68F	C26447T
EPI_ISL_459239	26447	C	T	26393	29782	E	S68F	SNP	Envelope	E:S68F	C26447T
EPI_ISL_460148	26447	C	T	26425	29855	E	S68F	SNP	Envelope	E:S68F	C26447T
EPI_ISL_460257	26447	C	T	26441	29876	E	S68F	SNP	Envelope	E:S68F	C26447T
EPI_ISL_465592	26447	C	T	26447	29903	E	S68F	SNP	Envelope	E:S68F	C26447T
EPI_ISL_465593	26447	C	T	26447	29903	E	S68F	SNP	Envelope	E:S68F	C26447T
EPI_ISL_465598	26447	C	T	26447	29903	E	S68F	SNP	Envelope	E:S68F	C26447T
EPI_ISL_469905	26447	C	T	26393	29782	E	S68F	SNP	Envelope	E:S68F	C26447T
EPI_ISL_469907	26447	C	T	26393	29782	E	S68F	SNP	Envelope	E:S68F	C26447T
EPI_ISL_471747	26447	C	T	26447	29903	E	S68F	SNP	Envelope	E:S68F	C26447T
EPI_ISL_471930	26447	C	T	26447	29903	E	S68F	SNP	Envelope	E:S68F	C26447T
EPI_ISL_472257	26447	C	T	26447	29903	E	S68F	SNP	Envelope	E:S68F	C26447T
EPI_ISL_473451	26447	C	T	26447	29903	E	S68F	SNP	Envelope	E:S68F	C26447T
EPI_ISL_474981	26447	C	A	26447	29903	E	S68Y	SNP	Envelope	E:S68Y	C26447A
EPI_ISL_455388	26447	C	G	26447	29902	E	S68C	SNP	Envelope	E:S68C	C26447G
EPI_ISL_434891	26447	C	T	26447	29903	E	S68F	SNP	Envelope	E:S68F	C26447T
EPI_ISL_455013	26447	C	G	26414	29870	E	S68C	SNP	Envelope	E:S68C	C26447G
EPI_ISL_449357	26447	C	T	26442	29898	E	S68F	SNP	Envelope	E:S68F	C26447T
EPI_ISL_449502	26447	C	T	26417	29836	E	S68F	SNP	Envelope	E:S68F	C26447T
EPI_ISL_449566	26447	C	T	26443	29899	E	S68F	SNP	Envelope	E:S68F	C26447T
EPI_ISL_453360	26447	C	T	26431	29887	E	S68F	SNP	Envelope	E:S68F	C26447T
EPI_ISL_455370	26447	C	G	26447	29902	E	S68C	SNP	Envelope	E:S68C	C26447G
EPI_ISL_416412	26447	C	T	26437	29893	E	S68F	SNP	Envelope	E:S68F	C26447T
EPI_ISL_439692	26447	C	T	26447	29903	E	S68F	SNP	Envelope	E:S68F	C26447T
EPI_ISL_439787	26447	C	T	26447	29903	E	S68F	SNP	Envelope	E:S68F	C26447T
EPI_ISL_439802	26447	C	T	26447	29903	E	S68F	SNP	Envelope	E:S68F	C26447T
EPI_ISL_449460	26447	C	T	26418	29837	E	S68F	SNP	Envelope	E:S68F	C26447T
EPI_ISL_449488	26447	C	T	26425	29844	E	S68F	SNP	Envelope	E:S68F	C26447T
EPI_ISL_449580	26447	C	T	26438	29857	E	S68F	SNP	Envelope	E:S68F	C26447T
EPI_ISL_449590	26447	C	T	26430	29886	E	S68F	SNP	Envelope	E:S68F	C26447T
EPI_ISL_449595	26447	C	T	26431	29850	E	S68F	SNP	Envelope	E:S68F	C26447T
EPI_ISL_453233	26447	C	T	26418	29837	E	S68F	SNP	Envelope	E:S68F	C26447T
EPI_ISL_439081	26447	C	T	26390	29779	E	S68F	SNP	Envelope	E:S68F	C26447T
EPI_ISL_448151	26447	C	T	26444	29900	E	S68F	SNP	Envelope	E:S68F	C26447T
EPI_ISL_448169	26447	C	T	26444	29900	E	S68F	SNP	Envelope	E:S68F	C26447T
EPI_ISL_459113	26447	C	T	26390	29779	E	S68F	SNP	Envelope	E:S68F	C26447T
EPI_ISL_459128	26447	C	T	26390	29779	E	S68F	SNP	Envelope	E:S68F	C26447T
EPI_ISL_461653	26447	C	T	26390	29779	E	S68F	SNP	Envelope	E:S68F	C26447T
EPI_ISL_469976	26447	C	T	26390	29779	E	S68F	SNP	Envelope	E:S68F	C26447T
EPI_ISL_469993	26447	C	T	26390	29779	E	S68F	SNP	Envelope	E:S68F	C26447T
EPI_ISL_473560	26447	C	T	26390	29779	E	S68F	SNP	Envelope	E:S68F	C26447T
EPI_ISL_473565	26447	C	T	26390	29779	E	S68F	SNP	Envelope	E:S68F	C26447T
EPI_ISL_473630	26447	C	T	26444	29900	E	S68F	SNP	Envelope	E:S68F	C26447T
EPI_ISL_473633	26447	C	T	26444	29900	E	S68F	SNP	Envelope	E:S68F	C26447T
EPI_ISL_451555	26447	C	T	26181	29408	E	S68F	SNP	Envelope	E:S68F	C26447T
EPI_ISL_468857	26447	C	T	26447	29903	E	S68F	SNP	Envelope	E:S68F	C26447T
EPI_ISL_438962	26447	C	T	26393	29779	E	S68F	SNP	Envelope	E:S68F	C26447T
EPI_ISL_413889	26447	C	G	26447	29903	E	S68C	SNP	Envelope	E:S68C	C26447G
EPI_ISL_414688	26447	C	G	26434	29854	E	S68C	SNP	Envelope	E:S68C	C26447G
EPI_ISL_429094	26447	C	G	26447	29903	E	S68C	SNP	Envelope	E:S68C	C26447G
EPI_ISL_429095	26447	C	G	26447	29903	E	S68C	SNP	Envelope	E:S68C	C26447G
EPI_ISL_455368	26447	C	G	26447	29902	E	S68C	SNP	Envelope	E:S68C	C26447G
EPI_ISL_455376	26447	C	G	26447	29902	E	S68C	SNP	Envelope	E:S68C	C26447G
EPI_ISL_438964	26447	C	T	26393	29779	E	S68F	SNP	Envelope	E:S68F	C26447T
EPI_ISL_455366	26447	C	G	26447	29902	E	S68C	SNP	Envelope	E:S68C	C26447G
EPI_ISL_425677	26447	C	T	26393	29782	E	S68F	SNP	Envelope	E:S68F	C26447T
EPI_ISL_466040	26447	C	T	26447	29903	E	S68F	SNP	Envelope	E:S68F	C26447T
EPI_ISL_438961	26447	C	T	26393	29808	E	S68F	SNP	Envelope	E:S68F	C26447T
EPI_ISL_438972	26447	C	T	26393	29808	E	S68F	SNP	Envelope	E:S68F	C26447T
EPI_ISL_469296	26447	C	T	26417	29833	E	S68F	SNP	Envelope	E:S68F	C26447T
EPI_ISL_455363	26447	C	G	26444	29900	E	S68C	SNP	Envelope	E:S68C	C26447G
EPI_ISL_455367	26447	C	G	26446	29902	E	S68C	SNP	Envelope	E:S68C	C26447G
EPI_ISL_455364	26447	C	G	26447	29902	E	S68C	SNP	Envelope	E:S68C	C26447G
EPI_ISL_454909	26447	C	G	26447	29903	E	S68C	SNP	Envelope	E:S68C	C26447G
EPI_ISL_454969	26447	C	G	26447	29903	E	S68C	SNP	Envelope	E:S68C	C26447G
EPI_ISL_420073	26450	G	T	26450	29903	E	R69I	SNP	Envelope	E:R69I	G26450T
EPI_ISL_431292	26450	G	T	26432	29827	E	R69I	SNP	Envelope	E:R69I	G26450T
EPI_ISL_451809	26450	G	T	26450	29903	E	R69I	SNP	Envelope	E:R69I	G26450T
EPI_ISL_452906	26450	G	T	26450	29903	E	R69I	SNP	Envelope	E:R69I	G26450T
EPI_ISL_452908	26450	G	T	26450	29903	E	R69I	SNP	Envelope	E:R69I	G26450T
EPI_ISL_452910	26450	G	T	26450	29903	E	R69I	SNP	Envelope	E:R69I	G26450T
EPI_ISL_452914	26450	G	T	26450	29903	E	R69I	SNP	Envelope	E:R69I	G26450T
EPI_ISL_452917	26450	G	T	26450	29903	E	R69I	SNP	Envelope	E:R69I	G26450T
EPI_ISL_456884	26450	G	A	26396	29782	E	R69K	SNP	Envelope	E:R69K	G26450A
EPI_ISL_456885	26450	G	A	26396	29782	E	R69K	SNP	Envelope	E:R69K	G26450A
EPI_ISL_456886	26450	G	A	26396	29782	E	R69K	SNP	Envelope	E:R69K	G26450A
EPI_ISL_456887	26450	G	A	26396	29782	E	R69K	SNP	Envelope	E:R69K	G26450A
EPI_ISL_458522	26450	G	T	26396	29782	E	R69I	SNP	Envelope	E:R69I	G26450T
EPI_ISL_458536	26450	G	T	26396	29782	E	R69I	SNP	Envelope	E:R69I	G26450T
EPI_ISL_458541	26450	G	T	26396	29782	E	R69I	SNP	Envelope	E:R69I	G26450T
EPI_ISL_458548	26450	G	T	26396	29782	E	R69I	SNP	Envelope	E:R69I	G26450T
EPI_ISL_458551	26450	G	T	26396	29782	E	R69I	SNP	Envelope	E:R69I	G26450T
EPI_ISL_458554	26450	G	T	26396	29782	E	R69I	SNP	Envelope	E:R69I	G26450T
EPI_ISL_458555	26450	G	T	26396	29782	E	R69I	SNP	Envelope	E:R69I	G26450T
EPI_ISL_458562	26450	G	T	26396	29782	E	R69I	SNP	Envelope	E:R69I	G26450T
EPI_ISL_458565	26450	G	T	26396	29782	E	R69I	SNP	Envelope	E:R69I	G26450T
EPI_ISL_465225	26450	G	T	26450	29903	E	R69I	SNP	Envelope	E:R69I	G26450T
EPI_ISL_472821	26450	G	T	26431	29884	E	R69I	SNP	Envelope	E:R69I	G26450T
EPI_ISL_472914	26450	G	T	26450	29903	E	R69I	SNP	Envelope	E:R69I	G26450T
EPI_ISL_472998	26450	G	T	26449	29902	E	R69I	SNP	Envelope	E:R69I	G26450T
EPI_ISL_473058	26450	G	T	26450	29903	E	R69I	SNP	Envelope	E:R69I	G26450T
EPI_ISL_473166	26450	G	T	26450	29903	E	R69I	SNP	Envelope	E:R69I	G26450T
EPI_ISL_473183	26450	G	T	26440	29893	E	R69I	SNP	Envelope	E:R69I	G26450T
EPI_ISL_470839	26450	G	T	26397	29803	E	R69I	SNP	Envelope	E:R69I	G26450T
EPI_ISL_427540	26452	G	T	26452	29873	E	V70F	SNP	Envelope	E:V70F	G26452T
EPI_ISL_451424	26452	G	T	26452	29903	E	V70F	SNP	Envelope	E:V70F	G26452T
EPI_ISL_436624	26454	T	C	26400	29611	E	V70V	SNP_silent	Envelope	E:V70V	T26454C
EPI_ISL_471415	26454	T	C	26416	29815	E	V70V	SNP_silent	Envelope	E:V70V	T26454C
EPI_ISL_467788	26455	C	T	26420	29868	E	P71S	SNP	Envelope	E:P71S	C26455T
EPI_ISL_417969	26456	C	T	26416	29819	E	P71L	SNP	Envelope	E:P71L	C26456T
EPI_ISL_428996	26456	C	T	26456	29903	E	P71L	SNP	Envelope	E:P71L	C26456T
EPI_ISL_433938	26456	C	T	26456	29903	E	P71L	SNP	Envelope	E:P71L	C26456T
EPI_ISL_435536	26456	C	T	26456	29903	E	P71L	SNP	Envelope	E:P71L	C26456T
EPI_ISL_435549	26456	C	T	26456	29903	E	P71L	SNP	Envelope	E:P71L	C26456T
EPI_ISL_440829	26456	C	T	26402	29812	E	P71L	SNP	Envelope	E:P71L	C26456T
EPI_ISL_442731	26456	C	T	26402	29782	E	P71L	SNP	Envelope	E:P71L	C26456T
EPI_ISL_444239	26456	C	T	26456	29903	E	P71L	SNP	Envelope	E:P71L	C26456T
EPI_ISL_451882	26456	C	T	26456	29903	E	P71L	SNP	Envelope	E:P71L	C26456T
EPI_ISL_454602	26456	C	T	26450	29858	E	P71L	SNP	Envelope	E:P71L	C26456T
EPI_ISL_454617	26456	C	T	26426	29873	E	P71L	SNP	Envelope	E:P71L	C26456T
EPI_ISL_454624	26456	C	T	26450	29897	E	P71L	SNP	Envelope	E:P71L	C26456T
EPI_ISL_454627	26456	C	T	26426	29873	E	P71L	SNP	Envelope	E:P71L	C26456T
EPI_ISL_454628	26456	C	T	26426	29873	E	P71L	SNP	Envelope	E:P71L	C26456T
EPI_ISL_454629	26456	C	T	26449	29896	E	P71L	SNP	Envelope	E:P71L	C26456T
EPI_ISL_454630	26456	C	T	26420	29867	E	P71L	SNP	Envelope	E:P71L	C26456T
EPI_ISL_455105	26456	C	T	26456	29903	E	P71L	SNP	Envelope	E:P71L	C26456T
EPI_ISL_455651	26456	C	T	26456	29903	E	P71L	SNP	Envelope	E:P71L	C26456T
EPI_ISL_456678	26456	C	T	26456	29903	E	P71L	SNP	Envelope	E:P71L	C26456T
EPI_ISL_456710	26456	C	T	26456	29903	E	P71L	SNP	Envelope	E:P71L	C26456T
EPI_ISL_458970	26456	C	T	26402	29782	E	P71L	SNP	Envelope	E:P71L	C26456T
EPI_ISL_459072	26456	C	T	26402	29782	E	P71L	SNP	Envelope	E:P71L	C26456T
EPI_ISL_459084	26456	C	T	26402	29782	E	P71L	SNP	Envelope	E:P71L	C26456T
EPI_ISL_461854	26456	C	T	26418	29865	E	P71L	SNP	Envelope	E:P71L	C26456T
EPI_ISL_465437	26456	C	T	26456	29903	E	P71L	SNP	Envelope	E:P71L	C26456T
EPI_ISL_468466	26456	C	T	26454	29864	E	P71L	SNP	Envelope	E:P71L	C26456T
EPI_ISL_470326	26456	C	T	26402	29760	E	P71L	SNP	Envelope	E:P71L	C26456T
EPI_ISL_472797	26456	C	T	26454	29901	E	P71L	SNP	Envelope	E:P71L	C26456T
EPI_ISL_472798	26456	C	T	26418	29865	E	P71L	SNP	Envelope	E:P71L	C26456T
EPI_ISL_423012	26456	C	T	26196	29668	E	P71L	SNP	Envelope	E:P71L	C26456T
EPI_ISL_432806	26456	C	T	26447	29894	E	P71L	SNP	Envelope	E:P71L	C26456T
EPI_ISL_433824	26456	C	T	26456	29903	E	P71L	SNP	Envelope	E:P71L	C26456T
EPI_ISL_449130	26456	C	T	26428	29875	E	P71L	SNP	Envelope	E:P71L	C26456T
EPI_ISL_467072	26456	C	A	26456	29903	E	P71H	SNP	Envelope	E:P71H	C26456A
EPI_ISL_434125	26456	C	T	26456	29903	E	P71L	SNP	Envelope	E:P71L	C26456T
EPI_ISL_414686	26458	G	T	26446	29858	E	D72Y	SNP	Envelope	E:D72Y	G26458T
EPI_ISL_421864	26458	G	C	26458	29903	E	D72H	SNP	Envelope	E:D72H	G26458C
EPI_ISL_423430	26458	G	C	26458	29903	E	D72H	SNP	Envelope	E:D72H	G26458C
EPI_ISL_423916	26458	G	C	26458	29903	E	D72H	SNP	Envelope	E:D72H	G26458C
EPI_ISL_434035	26458	G	C	26458	29903	E	D72H	SNP	Envelope	E:D72H	G26458C
EPI_ISL_441130	26458	G	C	26404	29842	E	D72H	SNP	Envelope	E:D72H	G26458C
EPI_ISL_441133	26458	G	C	26404	29782	E	D72H	SNP	Envelope	E:D72H	G26458C
EPI_ISL_441203	26458	G	C	26404	29849	E	D72H	SNP	Envelope	E:D72H	G26458C
EPI_ISL_441208	26458	G	C	26404	29849	E	D72H	SNP	Envelope	E:D72H	G26458C
EPI_ISL_441657	26458	G	C	26404	29782	E	D72H	SNP	Envelope	E:D72H	G26458C
EPI_ISL_441724	26458	G	C	26404	29849	E	D72H	SNP	Envelope	E:D72H	G26458C
EPI_ISL_441725	26458	G	C	26404	29849	E	D72H	SNP	Envelope	E:D72H	G26458C
EPI_ISL_441745	26458	G	C	26404	29849	E	D72H	SNP	Envelope	E:D72H	G26458C
EPI_ISL_442123	26458	G	C	26404	29811	E	D72H	SNP	Envelope	E:D72H	G26458C
EPI_ISL_442245	26458	G	C	26404	29849	E	D72H	SNP	Envelope	E:D72H	G26458C
EPI_ISL_442597	26458	G	C	26404	29849	E	D72H	SNP	Envelope	E:D72H	G26458C
EPI_ISL_447401	26458	G	T	26459	29892	E	D72Y	SNP	Envelope	E:D72Y	G26458T
EPI_ISL_449105	26458	G	C	26420	29865	E	D72H	SNP	Envelope	E:D72H	G26458C
EPI_ISL_449127	26458	G	C	26428	29873	E	D72H	SNP	Envelope	E:D72H	G26458C
EPI_ISL_468236	26458	G	T	26458	29903	E	D72Y	SNP	Envelope	E:D72Y	G26458T
EPI_ISL_470393	26458	G	C	26404	29782	E	D72H	SNP	Envelope	E:D72H	G26458C
EPI_ISL_470531	26458	G	C	26404	29782	E	D72H	SNP	Envelope	E:D72H	G26458C
EPI_ISL_451359	26458	G	A	26458	29903	E	D72N	SNP	Envelope	E:D72N	G26458A
EPI_ISL_416496	26459	A	G	26459	29869	E	D72G	SNP	Envelope	E:D72G	A26459G
EPI_ISL_420049	26459	A	G	26459	29851	E	D72G	SNP	Envelope	E:D72G	A26459G
EPI_ISL_420056	26459	A	G	26459	29816	E	D72G	SNP	Envelope	E:D72G	A26459G
EPI_ISL_421509	26459	A	G	26446	29851	E	D72G	SNP	Envelope	E:D72G	A26459G
EPI_ISL_417571	26461	C	T	26461	29903	E	L73F	SNP	Envelope	E:L73F	C26461T
EPI_ISL_417575	26461	C	T	26461	29903	E	L73F	SNP	Envelope	E:L73F	C26461T
EPI_ISL_417662	26461	C	T	26461	29903	E	L73F	SNP	Envelope	E:L73F	C26461T
EPI_ISL_418241	26461	C	T	26461	29862	E	L73F	SNP	Envelope	E:L73F	C26461T
EPI_ISL_419968	26461	C	T	26423	29865	E	L73F	SNP	Envelope	E:L73F	C26461T
EPI_ISL_421513	26461	C	T	26448	29849	E	L73F	SNP	Envelope	E:L73F	C26461T
EPI_ISL_425866	26461	C	T	26461	29903	E	L73F	SNP	Envelope	E:L73F	C26461T
EPI_ISL_427128	26461	C	T	26461	29903	E	L73F	SNP	Envelope	E:L73F	C26461T
EPI_ISL_427369	26461	C	G	26461	29900	E	L73V	SNP	Envelope	E:L73V	C26461G
EPI_ISL_429254	26461	C	T	26423	29334	E	L73F	SNP	Envelope	E:L73F	C26461T
EPI_ISL_429298	26461	C	T	26461	29903	E	L73F	SNP	Envelope	E:L73F	C26461T
EPI_ISL_429560	26461	C	T	26461	29903	E	L73F	SNP	Envelope	E:L73F	C26461T
EPI_ISL_430582	26461	C	T	26461	29903	E	L73F	SNP	Envelope	E:L73F	C26461T
EPI_ISL_433092	26461	C	T	26461	29903	E	L73F	SNP	Envelope	E:L73F	C26461T
EPI_ISL_433103	26461	C	T	26461	29903	E	L73F	SNP	Envelope	E:L73F	C26461T
EPI_ISL_433114	26461	C	T	26461	29903	E	L73F	SNP	Envelope	E:L73F	C26461T
EPI_ISL_433119	26461	C	T	26461	29903	E	L73F	SNP	Envelope	E:L73F	C26461T
EPI_ISL_433127	26461	C	T	26461	29903	E	L73F	SNP	Envelope	E:L73F	C26461T
EPI_ISL_433156	26461	C	T	26461	29903	E	L73F	SNP	Envelope	E:L73F	C26461T
EPI_ISL_433180	26461	C	T	26461	29903	E	L73F	SNP	Envelope	E:L73F	C26461T
EPI_ISL_433243	26461	C	T	26461	29903	E	L73F	SNP	Envelope	E:L73F	C26461T
EPI_ISL_433244	26461	C	T	26461	29903	E	L73F	SNP	Envelope	E:L73F	C26461T
EPI_ISL_436203	26461	C	G	26423	29812	E	L73V	SNP	Envelope	E:L73V	C26461G
EPI_ISL_439187	26461	C	T	26461	29903	E	L73F	SNP	Envelope	E:L73F	C26461T
EPI_ISL_439223	26461	C	T	26461	29903	E	L73F	SNP	Envelope	E:L73F	C26461T
EPI_ISL_439230	26461	C	T	26461	29903	E	L73F	SNP	Envelope	E:L73F	C26461T
EPI_ISL_439296	26461	C	T	26461	29903	E	L73F	SNP	Envelope	E:L73F	C26461T
EPI_ISL_439607	26461	C	T	26407	29849	E	L73F	SNP	Envelope	E:L73F	C26461T
EPI_ISL_440038	26461	C	T	26407	29782	E	L73F	SNP	Envelope	E:L73F	C26461T
EPI_ISL_441868	26461	C	G	26461	29903	E	L73V	SNP	Envelope	E:L73V	C26461G
EPI_ISL_446641	26461	C	T	26457	29899	E	L73F	SNP	Envelope	E:L73F	C26461T
EPI_ISL_448606	26461	C	T	26461	29903	E	L73F	SNP	Envelope	E:L73F	C26461T
EPI_ISL_448648	26461	C	T	26460	29902	E	L73F	SNP	Envelope	E:L73F	C26461T
EPI_ISL_448703	26461	C	T	26461	29903	E	L73F	SNP	Envelope	E:L73F	C26461T
EPI_ISL_448706	26461	C	T	26461	29903	E	L73F	SNP	Envelope	E:L73F	C26461T
EPI_ISL_449311	26461	C	T	26461	29903	E	L73F	SNP	Envelope	E:L73F	C26461T
EPI_ISL_449317	26461	C	T	26461	29903	E	L73F	SNP	Envelope	E:L73F	C26461T
EPI_ISL_449812	26461	C	T	26459	29901	E	L73F	SNP	Envelope	E:L73F	C26461T
EPI_ISL_450740	26461	C	T	26410	29320	E	L73F	SNP	Envelope	E:L73F	C26461T
EPI_ISL_452155	26461	C	T	26422	29864	E	L73F	SNP	Envelope	E:L73F	C26461T
EPI_ISL_452214	26461	C	T	26436	29805	E	L73F	SNP	Envelope	E:L73F	C26461T
EPI_ISL_457005	26461	C	T	26461	29903	E	L73F	SNP	Envelope	E:L73F	C26461T
EPI_ISL_460638	26461	C	T	26407	29775	E	L73F	SNP	Envelope	E:L73F	C26461T
EPI_ISL_460950	26461	C	T	26407	29775	E	L73F	SNP	Envelope	E:L73F	C26461T
EPI_ISL_461014	26461	C	T	26407	29775	E	L73F	SNP	Envelope	E:L73F	C26461T
EPI_ISL_461121	26461	C	T	26407	29775	E	L73F	SNP	Envelope	E:L73F	C26461T
EPI_ISL_461123	26461	C	T	26407	29775	E	L73F	SNP	Envelope	E:L73F	C26461T
EPI_ISL_461181	26461	C	T	26407	29775	E	L73F	SNP	Envelope	E:L73F	C26461T
EPI_ISL_461242	26461	C	T	26407	29775	E	L73F	SNP	Envelope	E:L73F	C26461T
EPI_ISL_468128	26461	C	G	26461	29900	E	L73V	SNP	Envelope	E:L73V	C26461G
EPI_ISL_471217	26461	C	T	26407	29782	E	L73F	SNP	Envelope	E:L73F	C26461T
EPI_ISL_446164	26461	C	T	26461	29903	E	L73F	SNP	Envelope	E:L73F	C26461T
EPI_ISL_427796	26461	C	T	26197	29412	E	L73F	SNP	Envelope	E:L73F	C26461T
EPI_ISL_427486	26462	T	C	26462	29903	E	L73P	SNP	Envelope	E:L73P	T26462C
EPI_ISL_437722	26464	C	T	26464	29903	E	L73L	SNP_silent	Envelope	E:L73L	C26464T
EPI_ISL_420621	26464	C	T	26466	29878	E	L73L	SNP_silent	Envelope	E:L73L	C26464T
EPI_ISL_422182	26464	C	T	26434	29873	E	L73L	SNP_silent	Envelope	E:L73L	C26464T
EPI_ISL_422209	26464	C	T	26426	29865	E	L73L	SNP_silent	Envelope	E:L73L	C26464T
EPI_ISL_430356	26464	C	T	26464	29903	E	L73L	SNP_silent	Envelope	E:L73L	C26464T
EPI_ISL_441201	26464	C	T	26410	29782	E	L73L	SNP_silent	Envelope	E:L73L	C26464T
EPI_ISL_441630	26464	C	T	26410	29814	E	L73L	SNP_silent	Envelope	E:L73L	C26464T
EPI_ISL_453152	26464	C	T	26464	29903	E	L73L	SNP_silent	Envelope	E:L73L	C26464T
EPI_ISL_465222	26464	C	T	26464	29903	E	L73L	SNP_silent	Envelope	E:L73L	C26464T
EPI_ISL_465656	26464	C	T	26464	29903	E	L73L	SNP_silent	Envelope	E:L73L	C26464T
EPI_ISL_472577	26464	C	T	26461	29900	E	L73L	SNP_silent	Envelope	E:L73L	C26464T
EPI_ISL_474819	26464	C	T	26464	29903	E	L73L	SNP_silent	Envelope	E:L73L	C26464T
EPI_ISL_419740	26464	C	T	26460	29899	E	L73L	SNP_silent	Envelope	E:L73L	C26464T
EPI_ISL_437705	26464	C	T	26464	29903	E	L73L	SNP_silent	Envelope	E:L73L	C26464T
EPI_ISL_418343	26464	C	T	26463	29881	E	L73L	SNP_silent	Envelope	E:L73L	C26464T
EPI_ISL_448934	26464	C	T	26433	29820	E	L73L	SNP_silent	Envelope	E:L73L	C26464T
EPI_ISL_464673	26464	C	T	26464	29903	E	L73L	SNP_silent	Envelope	E:L73L	C26464T
EPI_ISL_464675	26464	C	T	26464	29903	E	L73L	SNP_silent	Envelope	E:L73L	C26464T
EPI_ISL_454361	26465	T	C	26465	29840	E	L74P	SNP	Envelope	E:L74P	T26465C
EPI_ISL_427369	26465	TGG	.	26464	29900	E	V75	deletion_stop	Envelope	E:V75	TGG26465.
EPI_ISL_436203	26465	TGG	.	26426	29812	E	V75	deletion_stop	Envelope	E:V75	TGG26465.
EPI_ISL_468128	26465	TGG	.	26464	29900	E	V75	deletion_stop	Envelope	E:V75	TGG26465.
EPI_ISL_473343	26465	TGG	.	26464	29900	E	V75	deletion_stop	Envelope	E:V75	TGG26465.
EPI_ISL_416315	26465	T	C	26465	29903	E	L74P	SNP	Envelope	E:L74P	T26465C
EPI_ISL_426656	26466	G	A	26464	29901	E	L74L	SNP_silent	Envelope	E:L74L	G26466A
EPI_ISL_439234	26466	GG	TC	26466	29903	E	V75L	SNP	Envelope	E:V75L	GG26466TC
EPI_ISL_439235	26466	GG	TC	26466	29903	E	V75L	SNP	Envelope	E:V75L	GG26466TC
EPI_ISL_439298	26466	GG	TC	26466	29903	E	V75L	SNP	Envelope	E:V75L	GG26466TC
EPI_ISL_439312	26466	GG	TC	26466	29903	E	V75L	SNP	Envelope	E:V75L	GG26466TC
EPI_ISL_439319	26466	GG	TC	26466	29903	E	V75L	SNP	Envelope	E:V75L	GG26466TC
EPI_ISL_439333	26466	GG	TC	26466	29903	E	V75L	SNP	Envelope	E:V75L	GG26466TC
EPI_ISL_439338	26466	GG	TC	26466	29903	E	V75L	SNP	Envelope	E:V75L	GG26466TC
EPI_ISL_439347	26466	GG	TC	26466	29903	E	V75L	SNP	Envelope	E:V75L	GG26466TC
EPI_ISL_449312	26466	GG	TC	26466	29903	E	V75L	SNP	Envelope	E:V75L	GG26466TC
EPI_ISL_449318	26466	GG	TC	26466	29903	E	V75L	SNP	Envelope	E:V75L	GG26466TC
EPI_ISL_453154	26466	GG	TC	26466	29903	E	V75L	SNP	Envelope	E:V75L	GG26466TC
EPI_ISL_453179	26466	GG	TC	26466	29903	E	V75L	SNP	Envelope	E:V75L	GG26466TC
EPI_ISL_461726	26466	GG	TC	26466	29903	E	V75L	SNP	Envelope	E:V75L	GG26466TC
EPI_ISL_473814	26466	GG	TC	26466	29903	E	V75L	SNP	Envelope	E:V75L	GG26466TC
EPI_ISL_430146	26466	G	A	26466	29903	E	L74L	SNP_silent	Envelope	E:L74L	G26466A
EPI_ISL_455461	26467	G	T	26443	29867	E	V75F	SNP	Envelope	E:V75F	G26467T
EPI_ISL_428479	26467	G	T	26440	29839	E	V75F	SNP	Envelope	E:V75F	G26467T
EPI_ISL_428481	26467	G	T	26441	29840	E	V75F	SNP	Envelope	E:V75F	G26467T
EPI_ISL_428482	26467	G	T	26442	29841	E	V75F	SNP	Envelope	E:V75F	G26467T
EPI_ISL_436141	26467	G	T	26467	29903	E	V75F	SNP	Envelope	E:V75F	G26467T
EPI_ISL_436137	26467	G	T	26467	29903	E	V75F	SNP	Envelope	E:V75F	G26467T
EPI_ISL_436156	26467	G	T	26467	29903	E	V75F	SNP	Envelope	E:V75F	G26467T
EPI_ISL_436157	26467	G	T	26467	29903	E	V75F	SNP	Envelope	E:V75F	G26467T
EPI_ISL_428483	26467	G	T	26440	29839	E	V75F	SNP	Envelope	E:V75F	G26467T
EPI_ISL_428486	26467	G	T	26440	29839	E	V75F	SNP	Envelope	E:V75F	G26467T
EPI_ISL_428487	26467	G	T	26439	29838	E	V75F	SNP	Envelope	E:V75F	G26467T
EPI_ISL_474976	26469	C	A	26469	29902	E	V75V	SNP_silent	Envelope	E:V75V	C26469A
EPI_ISL_436444	26469	C	A	26469	29866	E	V75V	SNP_silent	Envelope	E:V75V	C26469A
S
