# Supplementary material for: Rational Primer and Probe Construction in PCR-Based Assays for the Efficient Diagnosis of Drifting Variants of SARS-CoV-2
Source: Adv Virol. 2022 May 13;2022:2965666. doi: 10.1155/2022/2965666 (PMC9122727; doi:10.1155/2022/2965666)
Supplement: Supplementary Materials — Supplementary 1: Multiple sequence alignment (MUSCLE) data/diagram of the entire N gene among analyzed 8 coronavirus sequences (NCBI GenBank IDs) by MEGA11 version 0.1 and is presented. Supplementary 2:: Original raw file downloaded from [15]. It contains all the records of mutations in SARS-CoV-2 genomes studied. Supplementary 3, 4, 5, 6, and 7: spreadsheet files for mutation analyses for NSP12ab, S, E, M, and N genes of SARS-CoV-2 genome, respectively, and are available on request. [file 2965666.f1.zip › 2965666.f1/Supplementery 6 (1).txt]

sample	refpos	refvar	qvar	qpos	qlength	protein	variant	varclass	annotation	varname	varclade
EPI_ISL_436555	26526	G	T	26494	29835	M	A2S	SNP	Membrane	M:A2S	G26526T
EPI_ISL_439898	26526	G	T	26472	29849	M	A2S	SNP	Membrane	M:A2S	G26526T
EPI_ISL_440090	26526	G	T	26472	29782	M	A2S	SNP	Membrane	M:A2S	G26526T
EPI_ISL_441176	26526	G	T	26472	29812	M	A2S	SNP	Membrane	M:A2S	G26526T
EPI_ISL_455480	26526	G	T	26526	29903	M	A2S	SNP	Membrane	M:A2S	G26526T
EPI_ISL_462239	26526	G	T	26472	29782	M	A2S	SNP	Membrane	M:A2S	G26526T
EPI_ISL_473449	26526	G	T	26517	29894	M	A2S	SNP	Membrane	M:A2S	G26526T
EPI_ISL_474044	26526	G	T	26496	29873	M	A2S	SNP	Membrane	M:A2S	G26526T
EPI_ISL_462991	26526	G	T	26527	29902	M	A2S	SNP	Membrane	M:A2S	G26526T
EPI_ISL_424360	26526	G	T	26518	29860	M	A2S	SNP	Membrane	M:A2S	G26526T
EPI_ISL_430283	26526	G	T	26526	29903	M	A2S	SNP	Membrane	M:A2S	G26526T
EPI_ISL_430722	26526	G	T	26472	29785	M	A2S	SNP	Membrane	M:A2S	G26526T
EPI_ISL_430725	26526	G	T	26472	29782	M	A2S	SNP	Membrane	M:A2S	G26526T
EPI_ISL_471620	26527	C	T	26494	29833	M	A2V	SNP	Membrane	M:A2V	C26527T
EPI_ISL_420391	26527	C	T	26473	29782	M	A2V	SNP	Membrane	M:A2V	C26527T
EPI_ISL_421449	26527	C	T	26487	29763	M	A2V	SNP	Membrane	M:A2V	C26527T
EPI_ISL_421493	26527	C	T	26377	29603	M	A2V	SNP	Membrane	M:A2V	C26527T
EPI_ISL_428672	26527	C	T	26527	29903	M	A2V	SNP	Membrane	M:A2V	C26527T
EPI_ISL_428899	26527	C	T	26527	29903	M	A2V	SNP	Membrane	M:A2V	C26527T
EPI_ISL_428901	26527	C	T	26527	29903	M	A2V	SNP	Membrane	M:A2V	C26527T
EPI_ISL_429776	26527	C	T	26527	29872	M	A2V	SNP	Membrane	M:A2V	C26527T
EPI_ISL_433695	26527	C	T	26524	29901	M	A2V	SNP	Membrane	M:A2V	C26527T
EPI_ISL_435140	26527	C	T	26527	29903	M	A2V	SNP	Membrane	M:A2V	C26527T
EPI_ISL_437340	26527	C	T	26489	29817	M	A2V	SNP	Membrane	M:A2V	C26527T
EPI_ISL_437343	26527	C	T	26489	29817	M	A2V	SNP	Membrane	M:A2V	C26527T
EPI_ISL_442816	26527	C	T	26473	29812	M	A2V	SNP	Membrane	M:A2V	C26527T
EPI_ISL_442906	26527	C	T	26473	29849	M	A2V	SNP	Membrane	M:A2V	C26527T
EPI_ISL_443388	26527	C	T	26473	29846	M	A2V	SNP	Membrane	M:A2V	C26527T
EPI_ISL_443670	26527	C	T	26525	29864	M	A2V	SNP	Membrane	M:A2V	C26527T
EPI_ISL_443680	26527	C	T	26473	29812	M	A2V	SNP	Membrane	M:A2V	C26527T
EPI_ISL_450843	26527	C	T	26502	29845	M	A2V	SNP	Membrane	M:A2V	C26527T
EPI_ISL_453849	26527	C	T	26377	29653	M	A2V	SNP	Membrane	M:A2V	C26527T
EPI_ISL_453850	26527	C	T	26384	29660	M	A2V	SNP	Membrane	M:A2V	C26527T
EPI_ISL_454127	26527	C	T	26487	29763	M	A2V	SNP	Membrane	M:A2V	C26527T
EPI_ISL_454132	26527	C	T	26487	29763	M	A2V	SNP	Membrane	M:A2V	C26527T
EPI_ISL_454134	26527	C	T	26487	29763	M	A2V	SNP	Membrane	M:A2V	C26527T
EPI_ISL_454162	26527	C	T	26478	29752	M	A2V	SNP	Membrane	M:A2V	C26527T
EPI_ISL_454163	26527	C	T	26487	29763	M	A2V	SNP	Membrane	M:A2V	C26527T
EPI_ISL_454164	26527	C	T	26478	29754	M	A2V	SNP	Membrane	M:A2V	C26527T
EPI_ISL_454167	26527	C	T	26487	29763	M	A2V	SNP	Membrane	M:A2V	C26527T
EPI_ISL_454175	26527	C	T	26458	29634	M	A2V	SNP	Membrane	M:A2V	C26527T
EPI_ISL_454390	26527	C	T	26527	29840	M	A2V	SNP	Membrane	M:A2V	C26527T
EPI_ISL_463975	26527	C	T	26525	29857	M	A2V	SNP	Membrane	M:A2V	C26527T
EPI_ISL_463980	26527	C	T	26492	29827	M	A2V	SNP	Membrane	M:A2V	C26527T
EPI_ISL_463984	26527	C	T	26492	29826	M	A2V	SNP	Membrane	M:A2V	C26527T
EPI_ISL_463990	26527	C	T	26335	29664	M	A2V	SNP	Membrane	M:A2V	C26527T
EPI_ISL_464019	26527	C	T	26527	29903	M	A2V	SNP	Membrane	M:A2V	C26527T
EPI_ISL_466628	26527	C	T	26527	29903	M	A2V	SNP	Membrane	M:A2V	C26527T
EPI_ISL_468678	26527	C	T	26527	29903	M	A2V	SNP	Membrane	M:A2V	C26527T
EPI_ISL_469213	26527	C	T	26527	29903	M	A2V	SNP	Membrane	M:A2V	C26527T
EPI_ISL_470298	26527	C	T	26473	29782	M	A2V	SNP	Membrane	M:A2V	C26527T
EPI_ISL_444555	26527	C	T	26527	29903	M	A2V	SNP	Membrane	M:A2V	C26527T
EPI_ISL_438443	26527	C	T	26470	29779	M	A2V	SNP	Membrane	M:A2V	C26527T
EPI_ISL_448539	26527	C	T	26527	29903	M	A2V	SNP	Membrane	M:A2V	C26527T
EPI_ISL_468107	26528	A	T	26528	29903	M	A2A	SNP_silent	Membrane	M:A2A	A26528T
EPI_ISL_468114	26528	A	T	26528	29903	M	A2A	SNP_silent	Membrane	M:A2A	A26528T
EPI_ISL_474982	26529	G	T	26529	29903	M	D3Y	SNP	Membrane	M:D3Y	G26529T
EPI_ISL_425231	26529	G	T	26529	29903	M	D3Y	SNP	Membrane	M:D3Y	G26529T
EPI_ISL_433671	26529	G	T	26529	29903	M	D3Y	SNP	Membrane	M:D3Y	G26529T
EPI_ISL_433673	26529	G	T	26529	29903	M	D3Y	SNP	Membrane	M:D3Y	G26529T
EPI_ISL_433759	26529	G	T	26529	29903	M	D3Y	SNP	Membrane	M:D3Y	G26529T
EPI_ISL_433866	26529	G	T	26529	29903	M	D3Y	SNP	Membrane	M:D3Y	G26529T
EPI_ISL_433978	26529	G	T	26529	29903	M	D3Y	SNP	Membrane	M:D3Y	G26529T
EPI_ISL_434020	26529	G	T	26529	29903	M	D3Y	SNP	Membrane	M:D3Y	G26529T
EPI_ISL_438627	26529	G	T	26529	29903	M	D3Y	SNP	Membrane	M:D3Y	G26529T
EPI_ISL_438648	26529	G	T	26529	29903	M	D3Y	SNP	Membrane	M:D3Y	G26529T
EPI_ISL_444418	26529	G	T	26529	29903	M	D3Y	SNP	Membrane	M:D3Y	G26529T
EPI_ISL_420095	26529	G	T	26529	29903	M	D3Y	SNP	Membrane	M:D3Y	G26529T
EPI_ISL_438579	26529	G	T	26529	29903	M	D3Y	SNP	Membrane	M:D3Y	G26529T
EPI_ISL_438601	26529	G	T	26529	29903	M	D3Y	SNP	Membrane	M:D3Y	G26529T
EPI_ISL_444357	26529	G	T	26529	29903	M	D3Y	SNP	Membrane	M:D3Y	G26529T
EPI_ISL_458165	26529	G	T	26475	29782	M	D3Y	SNP	Membrane	M:D3Y	G26529T
EPI_ISL_473371	26529	G	T	26529	29903	M	D3Y	SNP	Membrane	M:D3Y	G26529T
EPI_ISL_425436	26529	G	T	26529	29903	M	D3Y	SNP	Membrane	M:D3Y	G26529T
EPI_ISL_438536	26529	G	T	26475	29782	M	D3Y	SNP	Membrane	M:D3Y	G26529T
EPI_ISL_417563	26530	A	G	26530	29903	M	D3G	SNP	Membrane	M:D3G	A26530G
EPI_ISL_455700	26530	A	G	26530	29903	M	D3G	SNP	Membrane	M:D3G	A26530G
EPI_ISL_437610	26530	A	G	26493	29695	M	D3G	SNP	Membrane	M:D3G	A26530G
EPI_ISL_417799	26530	A	G	26530	29903	M	D3G	SNP	Membrane	M:D3G	A26530G
EPI_ISL_417812	26530	A	G	26530	29903	M	D3G	SNP	Membrane	M:D3G	A26530G
EPI_ISL_424451	26530	A	G	26530	29903	M	D3G	SNP	Membrane	M:D3G	A26530G
EPI_ISL_413999	26530	A	G	26519	29887	M	D3G	SNP	Membrane	M:D3G	A26530G
EPI_ISL_414010	26530	A	G	26530	29903	M	D3G	SNP	Membrane	M:D3G	A26530G
EPI_ISL_414027	26530	A	G	26530	29903	M	D3G	SNP	Membrane	M:D3G	A26530G
EPI_ISL_414524	26530	A	G	26530	29903	M	D3G	SNP	Membrane	M:D3G	A26530G
EPI_ISL_414646	26530	A	G	26530	29807	M	D3G	SNP	Membrane	M:D3G	A26530G
EPI_ISL_415153	26530	A	G	26476	29782	M	D3G	SNP	Membrane	M:D3G	A26530G
EPI_ISL_415155	26530	A	G	26476	29782	M	D3G	SNP	Membrane	M:D3G	A26530G
EPI_ISL_416469	26530	A	G	26476	29782	M	D3G	SNP	Membrane	M:D3G	A26530G
EPI_ISL_416470	26530	A	G	26476	29782	M	D3G	SNP	Membrane	M:D3G	A26530G
EPI_ISL_416735	26530	A	G	26530	29903	M	D3G	SNP	Membrane	M:D3G	A26530G
EPI_ISL_416741	26530	A	G	26519	29860	M	D3G	SNP	Membrane	M:D3G	A26530G
EPI_ISL_417013	26530	A	G	26476	29782	M	D3G	SNP	Membrane	M:D3G	A26530G
EPI_ISL_417016	26530	A	G	26476	29782	M	D3G	SNP	Membrane	M:D3G	A26530G
EPI_ISL_417019	26530	A	G	26476	29782	M	D3G	SNP	Membrane	M:D3G	A26530G
EPI_ISL_417424	26530	A	G	26491	29817	M	D3G	SNP	Membrane	M:D3G	A26530G
EPI_ISL_417434	26530	A	G	26476	29782	M	D3G	SNP	Membrane	M:D3G	A26530G
EPI_ISL_417491	26530	A	G	26489	29801	M	D3G	SNP	Membrane	M:D3G	A26530G
EPI_ISL_417550	26530	A	G	26530	29903	M	D3G	SNP	Membrane	M:D3G	A26530G
EPI_ISL_417560	26530	A	G	26530	29903	M	D3G	SNP	Membrane	M:D3G	A26530G
EPI_ISL_417652	26530	A	G	26530	29903	M	D3G	SNP	Membrane	M:D3G	A26530G
EPI_ISL_417694	26530	A	G	26530	29903	M	D3G	SNP	Membrane	M:D3G	A26530G
EPI_ISL_417740	26530	A	G	26530	29903	M	D3G	SNP	Membrane	M:D3G	A26530G
EPI_ISL_417746	26530	A	G	26530	29903	M	D3G	SNP	Membrane	M:D3G	A26530G
EPI_ISL_417758	26530	A	G	26530	29903	M	D3G	SNP	Membrane	M:D3G	A26530G
EPI_ISL_417763	26530	A	G	26530	29903	M	D3G	SNP	Membrane	M:D3G	A26530G
EPI_ISL_417775	26530	A	G	26530	29903	M	D3G	SNP	Membrane	M:D3G	A26530G
EPI_ISL_417877	26530	A	G	26530	29903	M	D3G	SNP	Membrane	M:D3G	A26530G
EPI_ISL_417948	26530	A	G	26526	29797	M	D3G	SNP	Membrane	M:D3G	A26530G
EPI_ISL_417955	26530	A	G	26499	29781	M	D3G	SNP	Membrane	M:D3G	A26530G
EPI_ISL_417989	26530	A	G	26490	29763	M	D3G	SNP	Membrane	M:D3G	A26530G
EPI_ISL_418260	26530	A	G	26338	29706	M	D3G	SNP	Membrane	M:D3G	A26530G
EPI_ISL_418624	26530	A	G	26476	29782	M	D3G	SNP	Membrane	M:D3G	A26530G
EPI_ISL_418794	26530	A	G	26476	29782	M	D3G	SNP	Membrane	M:D3G	A26530G
EPI_ISL_418801	26530	A	G	26495	29835	M	D3G	SNP	Membrane	M:D3G	A26530G
EPI_ISL_419395	26530	A	G	26476	29782	M	D3G	SNP	Membrane	M:D3G	A26530G
EPI_ISL_419576	26530	A	G	26530	29863	M	D3G	SNP	Membrane	M:D3G	A26530G
EPI_ISL_419583	26530	A	G	26530	29853	M	D3G	SNP	Membrane	M:D3G	A26530G
EPI_ISL_419767	26530	A	G	26492	29865	M	D3G	SNP	Membrane	M:D3G	A26530G
EPI_ISL_419770	26530	A	G	26518	29891	M	D3G	SNP	Membrane	M:D3G	A26530G
EPI_ISL_419774	26530	A	G	26492	29865	M	D3G	SNP	Membrane	M:D3G	A26530G
EPI_ISL_419775	26530	A	G	26526	29899	M	D3G	SNP	Membrane	M:D3G	A26530G
EPI_ISL_419787	26530	A	G	26492	29865	M	D3G	SNP	Membrane	M:D3G	A26530G
EPI_ISL_419810	26530	A	G	26523	29896	M	D3G	SNP	Membrane	M:D3G	A26530G
EPI_ISL_419888	26530	A	G	26521	29894	M	D3G	SNP	Membrane	M:D3G	A26530G
EPI_ISL_420032	26530	A	G	26524	29748	M	D3G	SNP	Membrane	M:D3G	A26530G
EPI_ISL_420134	26530	A	G	26520	29860	M	D3G	SNP	Membrane	M:D3G	A26530G
EPI_ISL_420137	26530	A	G	26522	29865	M	D3G	SNP	Membrane	M:D3G	A26530G
EPI_ISL_420139	26530	A	G	26519	29886	M	D3G	SNP	Membrane	M:D3G	A26530G
EPI_ISL_420146	26530	A	G	26521	29894	M	D3G	SNP	Membrane	M:D3G	A26530G
EPI_ISL_420313	26530	A	G	26519	29892	M	D3G	SNP	Membrane	M:D3G	A26530G
EPI_ISL_420325	26530	A	G	26476	29782	M	D3G	SNP	Membrane	M:D3G	A26530G
EPI_ISL_420329	26530	A	G	26476	29782	M	D3G	SNP	Membrane	M:D3G	A26530G
EPI_ISL_420342	26530	A	G	26476	29782	M	D3G	SNP	Membrane	M:D3G	A26530G
EPI_ISL_420347	26530	A	G	26476	29782	M	D3G	SNP	Membrane	M:D3G	A26530G
EPI_ISL_420414	26530	A	G	26476	29782	M	D3G	SNP	Membrane	M:D3G	A26530G
EPI_ISL_420443	26530	A	G	26476	29782	M	D3G	SNP	Membrane	M:D3G	A26530G
EPI_ISL_420449	26530	A	G	26476	29782	M	D3G	SNP	Membrane	M:D3G	A26530G
EPI_ISL_420451	26530	A	G	26476	29782	M	D3G	SNP	Membrane	M:D3G	A26530G
EPI_ISL_420564	26530	A	G	26530	29898	M	D3G	SNP	Membrane	M:D3G	A26530G
EPI_ISL_420633	26530	A	G	26521	29894	M	D3G	SNP	Membrane	M:D3G	A26530G
EPI_ISL_420775	26530	A	G	26521	29894	M	D3G	SNP	Membrane	M:D3G	A26530G
EPI_ISL_421186	26530	A	G	26530	29903	M	D3G	SNP	Membrane	M:D3G	A26530G
EPI_ISL_421515	26530	A	G	26476	29782	M	D3G	SNP	Membrane	M:D3G	A26530G
EPI_ISL_422562	26530	A	G	26475	29722	M	D3G	SNP	Membrane	M:D3G	A26530G
EPI_ISL_422601	26530	A	G	26476	29775	M	D3G	SNP	Membrane	M:D3G	A26530G
EPI_ISL_422643	26530	A	G	26476	29775	M	D3G	SNP	Membrane	M:D3G	A26530G
EPI_ISL_422712	26530	A	G	26476	29775	M	D3G	SNP	Membrane	M:D3G	A26530G
EPI_ISL_422790	26530	A	G	26476	29775	M	D3G	SNP	Membrane	M:D3G	A26530G
EPI_ISL_422822	26530	A	G	26476	29775	M	D3G	SNP	Membrane	M:D3G	A26530G
EPI_ISL_423182	26530	A	G	26530	29903	M	D3G	SNP	Membrane	M:D3G	A26530G
EPI_ISL_423530	26530	A	G	26530	29903	M	D3G	SNP	Membrane	M:D3G	A26530G
EPI_ISL_423555	26530	A	G	26521	29894	M	D3G	SNP	Membrane	M:D3G	A26530G
EPI_ISL_424343	26530	A	G	26505	29834	M	D3G	SNP	Membrane	M:D3G	A26530G
EPI_ISL_424364	26530	A	G	26517	29857	M	D3G	SNP	Membrane	M:D3G	A26530G
EPI_ISL_424365	26530	A	G	26518	29862	M	D3G	SNP	Membrane	M:D3G	A26530G
EPI_ISL_424377	26530	A	G	26530	29903	M	D3G	SNP	Membrane	M:D3G	A26530G
EPI_ISL_424385	26530	A	G	26530	29903	M	D3G	SNP	Membrane	M:D3G	A26530G
EPI_ISL_424387	26530	A	G	26530	29903	M	D3G	SNP	Membrane	M:D3G	A26530G
EPI_ISL_424428	26530	A	G	26530	29903	M	D3G	SNP	Membrane	M:D3G	A26530G
EPI_ISL_424486	26530	A	G	26530	29903	M	D3G	SNP	Membrane	M:D3G	A26530G
EPI_ISL_424600	26530	A	G	26530	29903	M	D3G	SNP	Membrane	M:D3G	A26530G
EPI_ISL_424613	26530	A	G	26530	29903	M	D3G	SNP	Membrane	M:D3G	A26530G
EPI_ISL_424614	26530	A	G	26530	29903	M	D3G	SNP	Membrane	M:D3G	A26530G
EPI_ISL_424616	26530	A	G	26530	29903	M	D3G	SNP	Membrane	M:D3G	A26530G
EPI_ISL_424653	26530	A	G	26530	29903	M	D3G	SNP	Membrane	M:D3G	A26530G
EPI_ISL_424660	26530	A	G	26530	29903	M	D3G	SNP	Membrane	M:D3G	A26530G
EPI_ISL_424905	26530	A	G	26530	29882	M	D3G	SNP	Membrane	M:D3G	A26530G
EPI_ISL_425055	26530	A	G	26530	29903	M	D3G	SNP	Membrane	M:D3G	A26530G
EPI_ISL_425240	26530	A	G	26530	29903	M	D3G	SNP	Membrane	M:D3G	A26530G
EPI_ISL_425333	26530	A	G	26530	29903	M	D3G	SNP	Membrane	M:D3G	A26530G
EPI_ISL_425374	26530	A	G	26530	29903	M	D3G	SNP	Membrane	M:D3G	A26530G
EPI_ISL_425380	26530	A	G	26530	29903	M	D3G	SNP	Membrane	M:D3G	A26530G
EPI_ISL_425801	26530	A	G	26476	29782	M	D3G	SNP	Membrane	M:D3G	A26530G
EPI_ISL_425811	26530	A	G	26476	29782	M	D3G	SNP	Membrane	M:D3G	A26530G
EPI_ISL_425812	26530	A	G	26476	29782	M	D3G	SNP	Membrane	M:D3G	A26530G
EPI_ISL_426289	26530	A	G	26530	29903	M	D3G	SNP	Membrane	M:D3G	A26530G
EPI_ISL_426701	26530	A	G	26526	29899	M	D3G	SNP	Membrane	M:D3G	A26530G
EPI_ISL_426747	26530	A	G	26530	29903	M	D3G	SNP	Membrane	M:D3G	A26530G
EPI_ISL_426796	26530	A	G	26530	29903	M	D3G	SNP	Membrane	M:D3G	A26530G
EPI_ISL_426802	26530	A	G	26530	29903	M	D3G	SNP	Membrane	M:D3G	A26530G
EPI_ISL_427364	26530	A	G	26530	29903	M	D3G	SNP	Membrane	M:D3G	A26530G
EPI_ISL_428860	26530	A	G	26530	29903	M	D3G	SNP	Membrane	M:D3G	A26530G
EPI_ISL_428861	26530	A	G	26530	29903	M	D3G	SNP	Membrane	M:D3G	A26530G
EPI_ISL_428870	26530	A	G	26530	29903	M	D3G	SNP	Membrane	M:D3G	A26530G
EPI_ISL_428879	26530	A	G	26530	29903	M	D3G	SNP	Membrane	M:D3G	A26530G
EPI_ISL_428947	26530	A	G	26530	29860	M	D3G	SNP	Membrane	M:D3G	A26530G
EPI_ISL_428957	26530	A	G	26530	29854	M	D3G	SNP	Membrane	M:D3G	A26530G
EPI_ISL_428960	26530	A	G	26530	29874	M	D3G	SNP	Membrane	M:D3G	A26530G
EPI_ISL_428961	26530	A	G	26530	29869	M	D3G	SNP	Membrane	M:D3G	A26530G
EPI_ISL_429137	26530	A	G	26530	29903	M	D3G	SNP	Membrane	M:D3G	A26530G
EPI_ISL_429215	26530	A	G	26522	29894	M	D3G	SNP	Membrane	M:D3G	A26530G
EPI_ISL_429220	26530	A	G	26527	29900	M	D3G	SNP	Membrane	M:D3G	A26530G
EPI_ISL_429734	26530	A	G	26530	29860	M	D3G	SNP	Membrane	M:D3G	A26530G
EPI_ISL_429759	26530	A	G	26530	29860	M	D3G	SNP	Membrane	M:D3G	A26530G
EPI_ISL_429798	26530	A	G	26530	29879	M	D3G	SNP	Membrane	M:D3G	A26530G
EPI_ISL_430640	26530	A	G	26530	29903	M	D3G	SNP	Membrane	M:D3G	A26530G
EPI_ISL_430660	26530	A	G	26530	29903	M	D3G	SNP	Membrane	M:D3G	A26530G
EPI_ISL_431011	26530	A	G	26492	29788	M	D3G	SNP	Membrane	M:D3G	A26530G
EPI_ISL_433266	26530	A	G	26530	29903	M	D3G	SNP	Membrane	M:D3G	A26530G
EPI_ISL_434352	26530	A	G	26530	29903	M	D3G	SNP	Membrane	M:D3G	A26530G
EPI_ISL_434361	26530	A	G	26530	29903	M	D3G	SNP	Membrane	M:D3G	A26530G
EPI_ISL_434383	26530	A	G	26530	29903	M	D3G	SNP	Membrane	M:D3G	A26530G
EPI_ISL_434643	26530	A	G	26530	29903	M	D3G	SNP	Membrane	M:D3G	A26530G
EPI_ISL_434644	26530	A	G	26530	29903	M	D3G	SNP	Membrane	M:D3G	A26530G
EPI_ISL_435033	26530	A	G	26519	29783	M	D3G	SNP	Membrane	M:D3G	A26530G
EPI_ISL_435046	26530	A	G	26530	29903	M	D3G	SNP	Membrane	M:D3G	A26530G
EPI_ISL_435128	26530	A	G	26530	29903	M	D3G	SNP	Membrane	M:D3G	A26530G
EPI_ISL_435168	26530	A	G	26492	29798	M	D3G	SNP	Membrane	M:D3G	A26530G
EPI_ISL_437203	26530	A	G	26530	29903	M	D3G	SNP	Membrane	M:D3G	A26530G
EPI_ISL_437301	26530	A	G	26530	29903	M	D3G	SNP	Membrane	M:D3G	A26530G
EPI_ISL_438289	26530	A	G	26476	29782	M	D3G	SNP	Membrane	M:D3G	A26530G
EPI_ISL_438523	26530	A	G	26467	29773	M	D3G	SNP	Membrane	M:D3G	A26530G
EPI_ISL_438661	26530	A	G	26530	29903	M	D3G	SNP	Membrane	M:D3G	A26530G
EPI_ISL_438721	26530	A	G	26521	29894	M	D3G	SNP	Membrane	M:D3G	A26530G
EPI_ISL_438723	26530	A	G	26530	29903	M	D3G	SNP	Membrane	M:D3G	A26530G
EPI_ISL_439489	26530	A	G	26467	29773	M	D3G	SNP	Membrane	M:D3G	A26530G
EPI_ISL_439884	26530	A	G	26476	29812	M	D3G	SNP	Membrane	M:D3G	A26530G
EPI_ISL_440216	26530	A	G	26476	29782	M	D3G	SNP	Membrane	M:D3G	A26530G
EPI_ISL_440255	26530	A	G	26476	29782	M	D3G	SNP	Membrane	M:D3G	A26530G
EPI_ISL_440270	26530	A	G	26476	29812	M	D3G	SNP	Membrane	M:D3G	A26530G
EPI_ISL_440280	26530	A	G	26476	29849	M	D3G	SNP	Membrane	M:D3G	A26530G
EPI_ISL_440591	26530	A	G	26467	29840	M	D3G	SNP	Membrane	M:D3G	A26530G
EPI_ISL_440783	26530	A	G	26476	29782	M	D3G	SNP	Membrane	M:D3G	A26530G
EPI_ISL_440829	26530	A	G	26476	29812	M	D3G	SNP	Membrane	M:D3G	A26530G
EPI_ISL_440957	26530	A	G	26530	29903	M	D3G	SNP	Membrane	M:D3G	A26530G
EPI_ISL_440960	26530	A	G	26530	29903	M	D3G	SNP	Membrane	M:D3G	A26530G
EPI_ISL_440971	26530	A	G	26530	29903	M	D3G	SNP	Membrane	M:D3G	A26530G
EPI_ISL_440972	26530	A	G	26530	29903	M	D3G	SNP	Membrane	M:D3G	A26530G
EPI_ISL_440973	26530	A	G	26530	29903	M	D3G	SNP	Membrane	M:D3G	A26530G
EPI_ISL_440976	26530	A	G	26530	29903	M	D3G	SNP	Membrane	M:D3G	A26530G
EPI_ISL_440983	26530	A	G	26530	29903	M	D3G	SNP	Membrane	M:D3G	A26530G
EPI_ISL_440986	26530	A	G	26530	29903	M	D3G	SNP	Membrane	M:D3G	A26530G
EPI_ISL_441001	26530	A	G	26530	29903	M	D3G	SNP	Membrane	M:D3G	A26530G
EPI_ISL_441002	26530	A	G	26530	29903	M	D3G	SNP	Membrane	M:D3G	A26530G
EPI_ISL_441003	26530	A	G	26530	29903	M	D3G	SNP	Membrane	M:D3G	A26530G
EPI_ISL_441005	26530	A	G	26530	29903	M	D3G	SNP	Membrane	M:D3G	A26530G
EPI_ISL_441011	26530	A	G	26530	29903	M	D3G	SNP	Membrane	M:D3G	A26530G
EPI_ISL_441028	26530	A	G	26530	29903	M	D3G	SNP	Membrane	M:D3G	A26530G
EPI_ISL_441032	26530	A	G	26530	29903	M	D3G	SNP	Membrane	M:D3G	A26530G
EPI_ISL_441034	26530	A	G	26530	29903	M	D3G	SNP	Membrane	M:D3G	A26530G
EPI_ISL_441092	26530	A	G	26476	29782	M	D3G	SNP	Membrane	M:D3G	A26530G
EPI_ISL_441679	26530	A	G	26476	29782	M	D3G	SNP	Membrane	M:D3G	A26530G
EPI_ISL_441833	26530	A	G	26476	29849	M	D3G	SNP	Membrane	M:D3G	A26530G
EPI_ISL_442299	26530	A	G	26476	29849	M	D3G	SNP	Membrane	M:D3G	A26530G
EPI_ISL_442731	26530	A	G	26476	29782	M	D3G	SNP	Membrane	M:D3G	A26530G
EPI_ISL_442816	26530	A	G	26476	29812	M	D3G	SNP	Membrane	M:D3G	A26530G
EPI_ISL_442817	26530	A	G	26476	29812	M	D3G	SNP	Membrane	M:D3G	A26530G
EPI_ISL_442906	26530	A	G	26476	29849	M	D3G	SNP	Membrane	M:D3G	A26530G
EPI_ISL_442983	26530	A	G	26476	29782	M	D3G	SNP	Membrane	M:D3G	A26530G
EPI_ISL_442989	26530	A	G	26476	29812	M	D3G	SNP	Membrane	M:D3G	A26530G
EPI_ISL_443038	26530	A	G	26476	29812	M	D3G	SNP	Membrane	M:D3G	A26530G
EPI_ISL_443067	26530	A	G	26476	29849	M	D3G	SNP	Membrane	M:D3G	A26530G
EPI_ISL_443294	26530	A	G	26530	29881	M	D3G	SNP	Membrane	M:D3G	A26530G
EPI_ISL_443331	26530	A	G	26476	29849	M	D3G	SNP	Membrane	M:D3G	A26530G
EPI_ISL_443337	26530	A	G	26476	29849	M	D3G	SNP	Membrane	M:D3G	A26530G
EPI_ISL_443350	26530	A	G	26476	29849	M	D3G	SNP	Membrane	M:D3G	A26530G
EPI_ISL_443388	26530	A	G	26476	29846	M	D3G	SNP	Membrane	M:D3G	A26530G
EPI_ISL_443406	26530	A	G	26476	29849	M	D3G	SNP	Membrane	M:D3G	A26530G
EPI_ISL_443501	26530	A	G	26476	29812	M	D3G	SNP	Membrane	M:D3G	A26530G
EPI_ISL_443562	26530	A	G	26476	29812	M	D3G	SNP	Membrane	M:D3G	A26530G
EPI_ISL_443623	26530	A	G	26476	29849	M	D3G	SNP	Membrane	M:D3G	A26530G
EPI_ISL_443657	26530	A	G	26476	29782	M	D3G	SNP	Membrane	M:D3G	A26530G
EPI_ISL_443661	26530	A	G	26476	29849	M	D3G	SNP	Membrane	M:D3G	A26530G
EPI_ISL_443670	26530	A	G	26528	29864	M	D3G	SNP	Membrane	M:D3G	A26530G
EPI_ISL_443673	26530	A	G	26476	29782	M	D3G	SNP	Membrane	M:D3G	A26530G
EPI_ISL_443680	26530	A	G	26476	29812	M	D3G	SNP	Membrane	M:D3G	A26530G
EPI_ISL_444092	26530	A	G	26530	29903	M	D3G	SNP	Membrane	M:D3G	A26530G
EPI_ISL_444099	26530	A	G	26530	29903	M	D3G	SNP	Membrane	M:D3G	A26530G
EPI_ISL_444104	26530	A	G	26530	29903	M	D3G	SNP	Membrane	M:D3G	A26530G
EPI_ISL_444111	26530	A	G	26530	29903	M	D3G	SNP	Membrane	M:D3G	A26530G
EPI_ISL_444120	26530	A	G	26530	29903	M	D3G	SNP	Membrane	M:D3G	A26530G
EPI_ISL_444130	26530	A	G	26530	29903	M	D3G	SNP	Membrane	M:D3G	A26530G
EPI_ISL_444139	26530	A	G	26530	29903	M	D3G	SNP	Membrane	M:D3G	A26530G
EPI_ISL_444149	26530	A	G	26530	29903	M	D3G	SNP	Membrane	M:D3G	A26530G
EPI_ISL_444150	26530	A	G	26530	29903	M	D3G	SNP	Membrane	M:D3G	A26530G
EPI_ISL_444152	26530	A	G	26530	29903	M	D3G	SNP	Membrane	M:D3G	A26530G
EPI_ISL_444161	26530	A	G	26530	29903	M	D3G	SNP	Membrane	M:D3G	A26530G
EPI_ISL_444165	26530	A	G	26530	29903	M	D3G	SNP	Membrane	M:D3G	A26530G
EPI_ISL_444178	26530	A	G	26530	29903	M	D3G	SNP	Membrane	M:D3G	A26530G
EPI_ISL_444335	26530	A	G	26530	29903	M	D3G	SNP	Membrane	M:D3G	A26530G
EPI_ISL_444411	26530	A	G	26521	29894	M	D3G	SNP	Membrane	M:D3G	A26530G
EPI_ISL_444867	26530	A	G	26530	29903	M	D3G	SNP	Membrane	M:D3G	A26530G
EPI_ISL_445166	26530	A	G	26530	29903	M	D3G	SNP	Membrane	M:D3G	A26530G
EPI_ISL_445407	26530	A	G	26526	29899	M	D3G	SNP	Membrane	M:D3G	A26530G
EPI_ISL_445428	26530	A	G	26530	29903	M	D3G	SNP	Membrane	M:D3G	A26530G
EPI_ISL_445436	26530	A	G	26513	29886	M	D3G	SNP	Membrane	M:D3G	A26530G
EPI_ISL_447122	26530	A	G	26530	29903	M	D3G	SNP	Membrane	M:D3G	A26530G
EPI_ISL_447125	26530	A	G	26530	29903	M	D3G	SNP	Membrane	M:D3G	A26530G
EPI_ISL_447126	26530	A	G	26530	29903	M	D3G	SNP	Membrane	M:D3G	A26530G
EPI_ISL_447131	26530	A	G	26530	29903	M	D3G	SNP	Membrane	M:D3G	A26530G
EPI_ISL_447158	26530	A	G	26530	29903	M	D3G	SNP	Membrane	M:D3G	A26530G
EPI_ISL_447231	26530	A	G	26518	29674	M	D3G	SNP	Membrane	M:D3G	A26530G
EPI_ISL_447232	26530	A	G	26492	29627	M	D3G	SNP	Membrane	M:D3G	A26530G
EPI_ISL_447233	26530	A	G	26492	29627	M	D3G	SNP	Membrane	M:D3G	A26530G
EPI_ISL_447234	26530	A	G	26513	29669	M	D3G	SNP	Membrane	M:D3G	A26530G
EPI_ISL_447235	26530	A	G	26492	29644	M	D3G	SNP	Membrane	M:D3G	A26530G
EPI_ISL_447237	26530	A	G	26492	29741	M	D3G	SNP	Membrane	M:D3G	A26530G
EPI_ISL_447240	26530	A	G	26520	29826	M	D3G	SNP	Membrane	M:D3G	A26530G
EPI_ISL_447248	26530	A	G	26493	29664	M	D3G	SNP	Membrane	M:D3G	A26530G
EPI_ISL_447249	26530	A	G	26513	29759	M	D3G	SNP	Membrane	M:D3G	A26530G
EPI_ISL_447268	26530	A	G	26531	29892	M	D3G	SNP	Membrane	M:D3G	A26530G
EPI_ISL_447837	26530	A	G	26519	29863	M	D3G	SNP	Membrane	M:D3G	A26530G
EPI_ISL_448022	26530	A	G	26530	29903	M	D3G	SNP	Membrane	M:D3G	A26530G
EPI_ISL_449262	26530	A	G	26530	29903	M	D3G	SNP	Membrane	M:D3G	A26530G
EPI_ISL_449635	26530	A	G	26521	29894	M	D3G	SNP	Membrane	M:D3G	A26530G
EPI_ISL_449640	26530	A	G	26521	29894	M	D3G	SNP	Membrane	M:D3G	A26530G
EPI_ISL_449677	26530	A	G	26530	29903	M	D3G	SNP	Membrane	M:D3G	A26530G
EPI_ISL_449699	26530	A	G	26530	29903	M	D3G	SNP	Membrane	M:D3G	A26530G
EPI_ISL_449786	26530	A	G	26520	29863	M	D3G	SNP	Membrane	M:D3G	A26530G
EPI_ISL_450107	26530	A	G	26475	29724	M	D3G	SNP	Membrane	M:D3G	A26530G
EPI_ISL_450129	26530	A	G	26475	29723	M	D3G	SNP	Membrane	M:D3G	A26530G
EPI_ISL_450309	26530	A	G	26530	29903	M	D3G	SNP	Membrane	M:D3G	A26530G
EPI_ISL_450352	26530	A	G	26510	29868	M	D3G	SNP	Membrane	M:D3G	A26530G
EPI_ISL_450646	26530	A	G	26530	29903	M	D3G	SNP	Membrane	M:D3G	A26530G
EPI_ISL_450725	26530	A	G	26530	29904	M	D3G	SNP	Membrane	M:D3G	A26530G
EPI_ISL_450737	26530	A	G	26530	29904	M	D3G	SNP	Membrane	M:D3G	A26530G
EPI_ISL_450751	26530	A	G	26495	29818	M	D3G	SNP	Membrane	M:D3G	A26530G
EPI_ISL_451304	26530	A	G	26508	29840	M	D3G	SNP	Membrane	M:D3G	A26530G
EPI_ISL_452042	26530	A	G	26530	29903	M	D3G	SNP	Membrane	M:D3G	A26530G
EPI_ISL_452098	26530	A	G	26527	29900	M	D3G	SNP	Membrane	M:D3G	A26530G
EPI_ISL_453487	26530	A	G	26530	29903	M	D3G	SNP	Membrane	M:D3G	A26530G
EPI_ISL_454083	26530	A	G	26490	29763	M	D3G	SNP	Membrane	M:D3G	A26530G
EPI_ISL_454136	26530	A	G	26490	29738	M	D3G	SNP	Membrane	M:D3G	A26530G
EPI_ISL_454209	26530	A	G	26490	29763	M	D3G	SNP	Membrane	M:D3G	A26530G
EPI_ISL_454238	26530	A	G	26481	29754	M	D3G	SNP	Membrane	M:D3G	A26530G
EPI_ISL_454243	26530	A	G	26490	29763	M	D3G	SNP	Membrane	M:D3G	A26530G
EPI_ISL_454255	26530	A	G	26380	29603	M	D3G	SNP	Membrane	M:D3G	A26530G
EPI_ISL_454296	26530	A	G	26481	29754	M	D3G	SNP	Membrane	M:D3G	A26530G
EPI_ISL_454436	26530	A	G	26530	29903	M	D3G	SNP	Membrane	M:D3G	A26530G
EPI_ISL_454439	26530	A	G	26530	29903	M	D3G	SNP	Membrane	M:D3G	A26530G
EPI_ISL_454463	26530	A	G	26530	29903	M	D3G	SNP	Membrane	M:D3G	A26530G
EPI_ISL_454527	26530	A	G	26530	29903	M	D3G	SNP	Membrane	M:D3G	A26530G
EPI_ISL_454884	26530	A	G	26530	29903	M	D3G	SNP	Membrane	M:D3G	A26530G
EPI_ISL_454885	26530	A	G	26530	29903	M	D3G	SNP	Membrane	M:D3G	A26530G
EPI_ISL_454900	26530	A	G	26530	29903	M	D3G	SNP	Membrane	M:D3G	A26530G
EPI_ISL_455121	26530	A	G	26476	29775	M	D3G	SNP	Membrane	M:D3G	A26530G
EPI_ISL_455181	26530	A	G	26476	29775	M	D3G	SNP	Membrane	M:D3G	A26530G
EPI_ISL_455182	26530	A	G	26476	29775	M	D3G	SNP	Membrane	M:D3G	A26530G
EPI_ISL_455183	26530	A	G	26476	29775	M	D3G	SNP	Membrane	M:D3G	A26530G
EPI_ISL_455184	26530	A	G	26476	29775	M	D3G	SNP	Membrane	M:D3G	A26530G
EPI_ISL_455185	26530	A	G	26476	29775	M	D3G	SNP	Membrane	M:D3G	A26530G
EPI_ISL_455187	26530	A	G	26476	29775	M	D3G	SNP	Membrane	M:D3G	A26530G
EPI_ISL_455188	26530	A	G	26476	29775	M	D3G	SNP	Membrane	M:D3G	A26530G
EPI_ISL_455189	26530	A	G	26476	29775	M	D3G	SNP	Membrane	M:D3G	A26530G
EPI_ISL_455190	26530	A	G	26476	29775	M	D3G	SNP	Membrane	M:D3G	A26530G
EPI_ISL_455191	26530	A	G	26476	29775	M	D3G	SNP	Membrane	M:D3G	A26530G
EPI_ISL_455192	26530	A	G	26476	29775	M	D3G	SNP	Membrane	M:D3G	A26530G
EPI_ISL_455193	26530	A	G	26476	29775	M	D3G	SNP	Membrane	M:D3G	A26530G
EPI_ISL_455445	26530	A	G	26530	29903	M	D3G	SNP	Membrane	M:D3G	A26530G
EPI_ISL_455446	26530	A	G	26530	29903	M	D3G	SNP	Membrane	M:D3G	A26530G
EPI_ISL_455907	26530	A	G	26530	29903	M	D3G	SNP	Membrane	M:D3G	A26530G
EPI_ISL_455976	26530	A	G	26530	29903	M	D3G	SNP	Membrane	M:D3G	A26530G
EPI_ISL_456676	26530	A	G	26530	29903	M	D3G	SNP	Membrane	M:D3G	A26530G
EPI_ISL_457749	26530	A	G	26524	29855	M	D3G	SNP	Membrane	M:D3G	A26530G
EPI_ISL_457826	26530	A	G	26517	29838	M	D3G	SNP	Membrane	M:D3G	A26530G
EPI_ISL_458159	26530	A	G	26476	29782	M	D3G	SNP	Membrane	M:D3G	A26530G
EPI_ISL_458191	26530	A	G	26476	29782	M	D3G	SNP	Membrane	M:D3G	A26530G
EPI_ISL_458970	26530	A	G	26476	29782	M	D3G	SNP	Membrane	M:D3G	A26530G
EPI_ISL_459072	26530	A	G	26476	29782	M	D3G	SNP	Membrane	M:D3G	A26530G
EPI_ISL_459084	26530	A	G	26476	29782	M	D3G	SNP	Membrane	M:D3G	A26530G
EPI_ISL_459171	26530	A	G	26476	29782	M	D3G	SNP	Membrane	M:D3G	A26530G
EPI_ISL_459224	26530	A	G	26476	29782	M	D3G	SNP	Membrane	M:D3G	A26530G
EPI_ISL_459247	26530	A	G	26476	29783	M	D3G	SNP	Membrane	M:D3G	A26530G
EPI_ISL_460079	26530	A	G	26505	29834	M	D3G	SNP	Membrane	M:D3G	A26530G
EPI_ISL_460083	26530	A	G	26505	29834	M	D3G	SNP	Membrane	M:D3G	A26530G
EPI_ISL_460465	26530	A	G	26502	29836	M	D3G	SNP	Membrane	M:D3G	A26530G
EPI_ISL_460675	26530	A	G	26476	29775	M	D3G	SNP	Membrane	M:D3G	A26530G
EPI_ISL_460682	26530	A	G	26476	29775	M	D3G	SNP	Membrane	M:D3G	A26530G
EPI_ISL_460935	26530	A	G	26476	29775	M	D3G	SNP	Membrane	M:D3G	A26530G
EPI_ISL_460937	26530	A	G	26476	29775	M	D3G	SNP	Membrane	M:D3G	A26530G
EPI_ISL_460938	26530	A	G	26476	29775	M	D3G	SNP	Membrane	M:D3G	A26530G
EPI_ISL_460939	26530	A	G	26476	29775	M	D3G	SNP	Membrane	M:D3G	A26530G
EPI_ISL_460940	26530	A	G	26476	29775	M	D3G	SNP	Membrane	M:D3G	A26530G
EPI_ISL_461083	26530	A	G	26476	29775	M	D3G	SNP	Membrane	M:D3G	A26530G
EPI_ISL_461121	26530	A	G	26476	29775	M	D3G	SNP	Membrane	M:D3G	A26530G
EPI_ISL_461123	26530	A	G	26476	29775	M	D3G	SNP	Membrane	M:D3G	A26530G
EPI_ISL_461181	26530	A	G	26476	29775	M	D3G	SNP	Membrane	M:D3G	A26530G
EPI_ISL_461187	26530	A	G	26476	29775	M	D3G	SNP	Membrane	M:D3G	A26530G
EPI_ISL_461189	26530	A	G	26476	29775	M	D3G	SNP	Membrane	M:D3G	A26530G
EPI_ISL_461194	26530	A	G	26476	29775	M	D3G	SNP	Membrane	M:D3G	A26530G
EPI_ISL_461196	26530	A	G	26476	29775	M	D3G	SNP	Membrane	M:D3G	A26530G
EPI_ISL_461242	26530	A	G	26476	29775	M	D3G	SNP	Membrane	M:D3G	A26530G
EPI_ISL_461248	26530	A	G	26476	29775	M	D3G	SNP	Membrane	M:D3G	A26530G
EPI_ISL_461249	26530	A	G	26476	29775	M	D3G	SNP	Membrane	M:D3G	A26530G
EPI_ISL_461250	26530	A	G	26476	29775	M	D3G	SNP	Membrane	M:D3G	A26530G
EPI_ISL_461251	26530	A	G	26476	29775	M	D3G	SNP	Membrane	M:D3G	A26530G
EPI_ISL_461252	26530	A	G	26476	29775	M	D3G	SNP	Membrane	M:D3G	A26530G
EPI_ISL_461253	26530	A	G	26476	29775	M	D3G	SNP	Membrane	M:D3G	A26530G
EPI_ISL_461259	26530	A	G	26476	29775	M	D3G	SNP	Membrane	M:D3G	A26530G
EPI_ISL_461260	26530	A	G	26476	29775	M	D3G	SNP	Membrane	M:D3G	A26530G
EPI_ISL_461261	26530	A	G	26476	29775	M	D3G	SNP	Membrane	M:D3G	A26530G
EPI_ISL_461272	26530	A	G	26476	29775	M	D3G	SNP	Membrane	M:D3G	A26530G
EPI_ISL_461274	26530	A	G	26476	29775	M	D3G	SNP	Membrane	M:D3G	A26530G
EPI_ISL_461291	26530	A	G	26476	29775	M	D3G	SNP	Membrane	M:D3G	A26530G
EPI_ISL_461307	26530	A	G	26476	29775	M	D3G	SNP	Membrane	M:D3G	A26530G
EPI_ISL_461312	26530	A	G	26476	29775	M	D3G	SNP	Membrane	M:D3G	A26530G
EPI_ISL_461313	26530	A	G	26476	29775	M	D3G	SNP	Membrane	M:D3G	A26530G
EPI_ISL_461326	26530	A	G	26476	29775	M	D3G	SNP	Membrane	M:D3G	A26530G
EPI_ISL_461327	26530	A	G	26476	29775	M	D3G	SNP	Membrane	M:D3G	A26530G
EPI_ISL_461328	26530	A	G	26476	29775	M	D3G	SNP	Membrane	M:D3G	A26530G
EPI_ISL_461329	26530	A	G	26476	29775	M	D3G	SNP	Membrane	M:D3G	A26530G
EPI_ISL_461330	26530	A	G	26476	29775	M	D3G	SNP	Membrane	M:D3G	A26530G
EPI_ISL_461331	26530	A	G	26476	29775	M	D3G	SNP	Membrane	M:D3G	A26530G
EPI_ISL_461332	26530	A	G	26476	29775	M	D3G	SNP	Membrane	M:D3G	A26530G
EPI_ISL_461333	26530	A	G	26476	29775	M	D3G	SNP	Membrane	M:D3G	A26530G
EPI_ISL_461340	26530	A	G	26476	29775	M	D3G	SNP	Membrane	M:D3G	A26530G
EPI_ISL_461342	26530	A	G	26476	29775	M	D3G	SNP	Membrane	M:D3G	A26530G
EPI_ISL_461344	26530	A	G	26476	29775	M	D3G	SNP	Membrane	M:D3G	A26530G
EPI_ISL_461345	26530	A	G	26476	29775	M	D3G	SNP	Membrane	M:D3G	A26530G
EPI_ISL_461346	26530	A	G	26476	29775	M	D3G	SNP	Membrane	M:D3G	A26530G
EPI_ISL_461347	26530	A	G	26476	29775	M	D3G	SNP	Membrane	M:D3G	A26530G
EPI_ISL_461348	26530	A	G	26476	29775	M	D3G	SNP	Membrane	M:D3G	A26530G
EPI_ISL_461350	26530	A	G	26476	29775	M	D3G	SNP	Membrane	M:D3G	A26530G
EPI_ISL_461351	26530	A	G	26476	29775	M	D3G	SNP	Membrane	M:D3G	A26530G
EPI_ISL_461352	26530	A	G	26476	29775	M	D3G	SNP	Membrane	M:D3G	A26530G
EPI_ISL_461353	26530	A	G	26476	29775	M	D3G	SNP	Membrane	M:D3G	A26530G
EPI_ISL_461355	26530	A	G	26476	29775	M	D3G	SNP	Membrane	M:D3G	A26530G
EPI_ISL_461356	26530	A	G	26476	29775	M	D3G	SNP	Membrane	M:D3G	A26530G
EPI_ISL_461357	26530	A	G	26476	29775	M	D3G	SNP	Membrane	M:D3G	A26530G
EPI_ISL_461358	26530	A	G	26476	29775	M	D3G	SNP	Membrane	M:D3G	A26530G
EPI_ISL_461361	26530	A	G	26476	29775	M	D3G	SNP	Membrane	M:D3G	A26530G
EPI_ISL_461363	26530	A	G	26476	29775	M	D3G	SNP	Membrane	M:D3G	A26530G
EPI_ISL_461364	26530	A	G	26476	29775	M	D3G	SNP	Membrane	M:D3G	A26530G
EPI_ISL_461365	26530	A	G	26476	29775	M	D3G	SNP	Membrane	M:D3G	A26530G
EPI_ISL_461366	26530	A	G	26476	29775	M	D3G	SNP	Membrane	M:D3G	A26530G
EPI_ISL_461765	26530	A	G	26530	29903	M	D3G	SNP	Membrane	M:D3G	A26530G
EPI_ISL_461769	26530	A	G	26530	29903	M	D3G	SNP	Membrane	M:D3G	A26530G
EPI_ISL_461972	26530	A	G	26530	29903	M	D3G	SNP	Membrane	M:D3G	A26530G
EPI_ISL_461973	26530	A	G	26530	29903	M	D3G	SNP	Membrane	M:D3G	A26530G
EPI_ISL_461974	26530	A	G	26530	29903	M	D3G	SNP	Membrane	M:D3G	A26530G
EPI_ISL_461975	26530	A	G	26530	29903	M	D3G	SNP	Membrane	M:D3G	A26530G
EPI_ISL_461976	26530	A	G	26530	29903	M	D3G	SNP	Membrane	M:D3G	A26530G
EPI_ISL_461977	26530	A	G	26530	29903	M	D3G	SNP	Membrane	M:D3G	A26530G
EPI_ISL_461979	26530	A	G	26530	29903	M	D3G	SNP	Membrane	M:D3G	A26530G
EPI_ISL_461981	26530	A	G	26530	29903	M	D3G	SNP	Membrane	M:D3G	A26530G
EPI_ISL_462248	26530	A	G	26476	29782	M	D3G	SNP	Membrane	M:D3G	A26530G
EPI_ISL_462258	26530	A	G	26476	29782	M	D3G	SNP	Membrane	M:D3G	A26530G
EPI_ISL_462462	26530	A	G	26516	29859	M	D3G	SNP	Membrane	M:D3G	A26530G
EPI_ISL_463918	26530	A	G	26530	29903	M	D3G	SNP	Membrane	M:D3G	A26530G
EPI_ISL_464445	26530	A	G	26530	29903	M	D3G	SNP	Membrane	M:D3G	A26530G
EPI_ISL_464571	26530	A	G	26530	29903	M	D3G	SNP	Membrane	M:D3G	A26530G
EPI_ISL_464579	26530	A	G	26530	29903	M	D3G	SNP	Membrane	M:D3G	A26530G
EPI_ISL_464588	26530	A	G	26530	29903	M	D3G	SNP	Membrane	M:D3G	A26530G
EPI_ISL_464614	26530	A	G	26530	29903	M	D3G	SNP	Membrane	M:D3G	A26530G
EPI_ISL_464657	26530	A	G	26530	29903	M	D3G	SNP	Membrane	M:D3G	A26530G
EPI_ISL_464698	26530	A	G	26530	29903	M	D3G	SNP	Membrane	M:D3G	A26530G
EPI_ISL_464841	26530	A	G	26530	29903	M	D3G	SNP	Membrane	M:D3G	A26530G
EPI_ISL_465749	26530	A	G	26530	29903	M	D3G	SNP	Membrane	M:D3G	A26530G
EPI_ISL_465750	26530	A	G	26530	29903	M	D3G	SNP	Membrane	M:D3G	A26530G
EPI_ISL_465835	26530	A	G	26530	29903	M	D3G	SNP	Membrane	M:D3G	A26530G
EPI_ISL_466042	26530	A	G	26530	29903	M	D3G	SNP	Membrane	M:D3G	A26530G
EPI_ISL_466224	26530	A	G	26521	29894	M	D3G	SNP	Membrane	M:D3G	A26530G
EPI_ISL_466472	26530	A	G	26521	29894	M	D3G	SNP	Membrane	M:D3G	A26530G
EPI_ISL_467666	26530	A	G	26640	30013	M	D3G	SNP	Membrane	M:D3G	A26530G
EPI_ISL_467865	26530	A	G	26476	29782	M	D3G	SNP	Membrane	M:D3G	A26530G
EPI_ISL_468736	26530	A	G	26530	29903	M	D3G	SNP	Membrane	M:D3G	A26530G
EPI_ISL_468740	26530	A	G	26530	29903	M	D3G	SNP	Membrane	M:D3G	A26530G
EPI_ISL_468746	26530	A	G	26530	29903	M	D3G	SNP	Membrane	M:D3G	A26530G
EPI_ISL_469076	26530	A	G	26530	29903	M	D3G	SNP	Membrane	M:D3G	A26530G
EPI_ISL_469702	26530	A	G	26476	29782	M	D3G	SNP	Membrane	M:D3G	A26530G
EPI_ISL_470125	26530	A	G	26476	29782	M	D3G	SNP	Membrane	M:D3G	A26530G
EPI_ISL_470298	26530	A	G	26476	29782	M	D3G	SNP	Membrane	M:D3G	A26530G
EPI_ISL_470299	26530	A	G	26476	29782	M	D3G	SNP	Membrane	M:D3G	A26530G
EPI_ISL_470359	26530	A	G	26476	29782	M	D3G	SNP	Membrane	M:D3G	A26530G
EPI_ISL_470372	26530	A	G	26476	29782	M	D3G	SNP	Membrane	M:D3G	A26530G
EPI_ISL_470444	26530	A	G	26472	29778	M	D3G	SNP	Membrane	M:D3G	A26530G
EPI_ISL_471396	26530	A	G	26492	29798	M	D3G	SNP	Membrane	M:D3G	A26530G
EPI_ISL_471399	26530	A	G	26521	29787	M	D3G	SNP	Membrane	M:D3G	A26530G
EPI_ISL_471409	26530	A	G	26493	29801	M	D3G	SNP	Membrane	M:D3G	A26530G
EPI_ISL_471530	26530	A	G	26476	29782	M	D3G	SNP	Membrane	M:D3G	A26530G
EPI_ISL_472135	26530	A	G	26530	29903	M	D3G	SNP	Membrane	M:D3G	A26530G
EPI_ISL_474872	26530	A	G	26530	29903	M	D3G	SNP	Membrane	M:D3G	A26530G
EPI_ISL_414617	26530	A	G	26483	29855	M	D3G	SNP	Membrane	M:D3G	A26530G
EPI_ISL_462477	26531	.	A	26532	29904	M	D3	insertion_frameshift	Membrane	M:D3	.26531A
EPI_ISL_441067	26532	T	G	26478	29782	M	S4A	SNP	Membrane	M:S4A	T26532G
EPI_ISL_441188	26532	T	G	26478	29782	M	S4A	SNP	Membrane	M:S4A	T26532G
EPI_ISL_442867	26532	T	G	26478	29782	M	S4A	SNP	Membrane	M:S4A	T26532G
EPI_ISL_443629	26532	T	G	26478	29782	M	S4A	SNP	Membrane	M:S4A	T26532G
EPI_ISL_416321	26533	C	T	26502	29835	M	S4F	SNP	Membrane	M:S4F	C26533T
EPI_ISL_430815	26533	C	T	26485	29800	M	S4F	SNP	Membrane	M:S4F	C26533T
EPI_ISL_469244	26533	C	T	26509	29814	M	S4F	SNP	Membrane	M:S4F	C26533T
EPI_ISL_439434	26533	C	T	26479	29812	M	S4F	SNP	Membrane	M:S4F	C26533T
EPI_ISL_424070	26533	C	T	26530	29900	M	S4F	SNP	Membrane	M:S4F	C26533T
EPI_ISL_424071	26533	C	T	26530	29900	M	S4F	SNP	Membrane	M:S4F	C26533T
EPI_ISL_424072	26533	C	T	26530	29900	M	S4F	SNP	Membrane	M:S4F	C26533T
EPI_ISL_424074	26533	C	T	26530	29900	M	S4F	SNP	Membrane	M:S4F	C26533T
EPI_ISL_473310	26533	C	T	26530	29900	M	S4F	SNP	Membrane	M:S4F	C26533T
EPI_ISL_432947	26533	C	T	26533	29903	M	S4F	SNP	Membrane	M:S4F	C26533T
EPI_ISL_440981	26534	C	T	26534	29903	M	S4S	SNP_silent	Membrane	M:S4S	C26534T
EPI_ISL_444163	26534	C	T	26534	29903	M	S4S	SNP_silent	Membrane	M:S4S	C26534T
EPI_ISL_446041	26534	C	T	26510	29879	M	S4S	SNP_silent	Membrane	M:S4S	C26534T
EPI_ISL_446559	26534	C	T	26496	29865	M	S4S	SNP_silent	Membrane	M:S4S	C26534T
EPI_ISL_446815	26534	C	T	26516	29885	M	S4S	SNP_silent	Membrane	M:S4S	C26534T
EPI_ISL_446824	26534	C	T	26506	29875	M	S4S	SNP_silent	Membrane	M:S4S	C26534T
EPI_ISL_446920	26534	C	T	26487	29856	M	S4S	SNP_silent	Membrane	M:S4S	C26534T
EPI_ISL_446964	26534	C	T	26487	29856	M	S4S	SNP_silent	Membrane	M:S4S	C26534T
EPI_ISL_449657	26534	C	T	26534	29903	M	S4S	SNP_silent	Membrane	M:S4S	C26534T
EPI_ISL_449658	26534	C	T	26534	29903	M	S4S	SNP_silent	Membrane	M:S4S	C26534T
EPI_ISL_460323	26534	C	T	26501	29831	M	S4S	SNP_silent	Membrane	M:S4S	C26534T
EPI_ISL_474189	26534	C	T	26494	29863	M	S4S	SNP_silent	Membrane	M:S4S	C26534T
EPI_ISL_474695	26534	C	T	26525	29894	M	S4S	SNP_silent	Membrane	M:S4S	C26534T
EPI_ISL_450314	26536	A	G	26536	29903	M	N5S	SNP	Membrane	M:N5S	A26536G
EPI_ISL_460844	26539	G	T	26485	29775	M	G6V	SNP	Membrane	M:G6V	G26539T
EPI_ISL_460845	26539	G	T	26485	29775	M	G6V	SNP	Membrane	M:G6V	G26539T
EPI_ISL_460851	26539	G	T	26485	29775	M	G6V	SNP	Membrane	M:G6V	G26539T
EPI_ISL_460855	26539	G	T	26485	29775	M	G6V	SNP	Membrane	M:G6V	G26539T
EPI_ISL_471620	26542	C	T	26509	29833	M	T7I	SNP	Membrane	M:T7I	C26542T
EPI_ISL_434368	26542	C	T	26542	29903	M	T7I	SNP	Membrane	M:T7I	C26542T
EPI_ISL_452906	26542	C	T	26542	29903	M	T7I	SNP	Membrane	M:T7I	C26542T
EPI_ISL_452910	26542	C	T	26542	29903	M	T7I	SNP	Membrane	M:T7I	C26542T
EPI_ISL_452917	26542	C	T	26542	29903	M	T7I	SNP	Membrane	M:T7I	C26542T
EPI_ISL_458554	26542	C	T	26488	29782	M	T7I	SNP	Membrane	M:T7I	C26542T
EPI_ISL_473439	26542	C	T	26539	29900	M	T7I	SNP	Membrane	M:T7I	C26542T
EPI_ISL_458833	26542	C	T	26488	29782	M	T7I	SNP	Membrane	M:T7I	C26542T
EPI_ISL_458849	26542	C	T	26488	29782	M	T7I	SNP	Membrane	M:T7I	C26542T
EPI_ISL_455105	26544	A	G	26544	29903	M	I8V	SNP	Membrane	M:I8V	A26544G
EPI_ISL_427287	26545	T	C	26491	29782	M	I8T	SNP	Membrane	M:I8T	T26545C
EPI_ISL_460056	26545	T	C	26541	29849	M	I8T	SNP	Membrane	M:I8T	T26545C
EPI_ISL_447255	26545	T	G	26545	29903	M	I8S	SNP	Membrane	M:I8S	T26545G
EPI_ISL_433171	26545	T	C	26545	29903	M	I8T	SNP	Membrane	M:I8T	T26545C
EPI_ISL_433172	26545	T	C	26545	29903	M	I8T	SNP	Membrane	M:I8T	T26545C
EPI_ISL_433443	26545	T	C	26545	29903	M	I8T	SNP	Membrane	M:I8T	T26545C
EPI_ISL_437319	26549	C	T	26543	29891	M	T9T	SNP_silent	Membrane	M:T9T	C26549T
EPI_ISL_437320	26549	C	T	26543	29897	M	T9T	SNP_silent	Membrane	M:T9T	C26549T
EPI_ISL_437321	26549	C	T	26543	29890	M	T9T	SNP_silent	Membrane	M:T9T	C26549T
EPI_ISL_437331	26549	C	T	26543	29831	M	T9T	SNP_silent	Membrane	M:T9T	C26549T
EPI_ISL_437332	26549	C	T	26543	29881	M	T9T	SNP_silent	Membrane	M:T9T	C26549T
EPI_ISL_437335	26549	C	T	26543	29885	M	T9T	SNP_silent	Membrane	M:T9T	C26549T
EPI_ISL_435057	26549	C	T	26588	30093	M	T9T	SNP_silent	Membrane	M:T9T	C26549T
EPI_ISL_437305	26549	C	T	26543	29897	M	T9T	SNP_silent	Membrane	M:T9T	C26549T
EPI_ISL_437322	26549	C	T	26543	29892	M	T9T	SNP_silent	Membrane	M:T9T	C26549T
EPI_ISL_437323	26549	C	T	26543	29886	M	T9T	SNP_silent	Membrane	M:T9T	C26549T
EPI_ISL_437330	26549	C	T	26543	29880	M	T9T	SNP_silent	Membrane	M:T9T	C26549T
EPI_ISL_437324	26549	C	T	26543	29894	M	T9T	SNP_silent	Membrane	M:T9T	C26549T
EPI_ISL_437333	26549	C	T	26543	29872	M	T9T	SNP_silent	Membrane	M:T9T	C26549T
EPI_ISL_468257	26550	G	A	26550	29903	M	V10I	SNP	Membrane	M:V10I	G26550A
EPI_ISL_417413	26551	T	C	26551	29903	M	V10A	SNP	Membrane	M:V10A	T26551C
EPI_ISL_437331	26551	T	C	26545	29831	M	V10A	SNP	Membrane	M:V10A	T26551C
EPI_ISL_437335	26551	T	C	26545	29885	M	V10A	SNP	Membrane	M:V10A	T26551C
EPI_ISL_435057	26551	T	C	26590	30093	M	V10A	SNP	Membrane	M:V10A	T26551C
EPI_ISL_437322	26551	T	C	26545	29892	M	V10A	SNP	Membrane	M:V10A	T26551C
EPI_ISL_437324	26551	T	C	26545	29894	M	V10A	SNP	Membrane	M:V10A	T26551C
EPI_ISL_470838	26551	T	.	11218	12831	M	V10	deletion_frameshift	Membrane	M:V10	T26551.
EPI_ISL_454281	26552	T	G	26512	29763	M	V10V	SNP_silent	Membrane	M:V10V	T26552G
EPI_ISL_463035	26554	A	G	26554	29548	M	E11G	SNP	Membrane	M:E11G	A26554G
EPI_ISL_463091	26554	A	G	26554	29345	M	E11G	SNP	Membrane	M:E11G	A26554G
EPI_ISL_463050	26554	A	G	26554	29683	M	E11G	SNP	Membrane	M:E11G	A26554G
EPI_ISL_463030	26554	A	G	26554	29278	M	E11G	SNP	Membrane	M:E11G	A26554G
EPI_ISL_445174	26554	A	G	26550	29870	M	E11G	SNP	Membrane	M:E11G	A26554G
EPI_ISL_467570	26556	G	T	26531	29878	M	E12*	SNP_stop	Membrane	M:E12*	G26556T
EPI_ISL_438652	26557	A	G	26557	29903	M	E12G	SNP	Membrane	M:E12G	A26557G
EPI_ISL_472002	26558	G	A	26558	29903	M	E12E	SNP_silent	Membrane	M:E12E	G26558A
EPI_ISL_472005	26558	G	A	26558	29903	M	E12E	SNP_silent	Membrane	M:E12E	G26558A
EPI_ISL_472008	26558	G	A	26558	29903	M	E12E	SNP_silent	Membrane	M:E12E	G26558A
EPI_ISL_454936	26558	G	T	26558	29903	M	E12D	SNP	Membrane	M:E12D	G26558T
EPI_ISL_458150	26559	C	T	26537	29838	M	L13F	SNP	Membrane	M:L13F	C26559T
EPI_ISL_427244	26562	AAA	TTT	26538	29890	M	K14F	SNP	Membrane	M:K14F	AAA26562TTT
EPI_ISL_438337	26564	A	G	26510	29782	M	K14K	SNP_silent	Membrane	M:K14K	A26564G
EPI_ISL_442012	26564	A	G	26564	29903	M	K14K	SNP_silent	Membrane	M:K14K	A26564G
EPI_ISL_460813	26565	A	G	26511	29775	M	K15E	SNP	Membrane	M:K15E	A26565G
EPI_ISL_438185	26566	A	G	26566	29903	M	K15R	SNP	Membrane	M:K15R	A26566G
EPI_ISL_449928	26566	A	G	26566	29903	M	K15R	SNP	Membrane	M:K15R	A26566G
EPI_ISL_463340	26566	A	G	26566	29903	M	K15R	SNP	Membrane	M:K15R	A26566G
EPI_ISL_463440	26566	A	G	26566	29903	M	K15R	SNP	Membrane	M:K15R	A26566G
EPI_ISL_463441	26566	A	G	26566	29903	M	K15R	SNP	Membrane	M:K15R	A26566G
EPI_ISL_463498	26566	A	G	26566	29903	M	K15R	SNP	Membrane	M:K15R	A26566G
EPI_ISL_463499	26566	A	G	26566	29903	M	K15R	SNP	Membrane	M:K15R	A26566G
EPI_ISL_463503	26566	A	G	26566	29903	M	K15R	SNP	Membrane	M:K15R	A26566G
EPI_ISL_463506	26566	A	G	26566	29903	M	K15R	SNP	Membrane	M:K15R	A26566G
EPI_ISL_463512	26566	A	G	26566	29903	M	K15R	SNP	Membrane	M:K15R	A26566G
EPI_ISL_463577	26566	A	G	26566	29903	M	K15R	SNP	Membrane	M:K15R	A26566G
EPI_ISL_463633	26566	A	G	26566	29903	M	K15R	SNP	Membrane	M:K15R	A26566G
EPI_ISL_463651	26566	A	G	26566	29903	M	K15R	SNP	Membrane	M:K15R	A26566G
EPI_ISL_463664	26566	A	G	26566	29903	M	K15R	SNP	Membrane	M:K15R	A26566G
EPI_ISL_463666	26566	A	G	26566	29903	M	K15R	SNP	Membrane	M:K15R	A26566G
EPI_ISL_463680	26566	A	G	26566	29903	M	K15R	SNP	Membrane	M:K15R	A26566G
EPI_ISL_463681	26566	A	G	26566	29903	M	K15R	SNP	Membrane	M:K15R	A26566G
EPI_ISL_463684	26566	A	G	26566	29903	M	K15R	SNP	Membrane	M:K15R	A26566G
EPI_ISL_465551	26567	G	T	26567	29903	M	K15N	SNP	Membrane	M:K15N	G26567T
EPI_ISL_465552	26567	G	T	26567	29903	M	K15N	SNP	Membrane	M:K15N	G26567T
EPI_ISL_465553	26567	G	T	26567	29903	M	K15N	SNP	Membrane	M:K15N	G26567T
EPI_ISL_465554	26567	G	T	26567	29903	M	K15N	SNP	Membrane	M:K15N	G26567T
EPI_ISL_465555	26567	G	T	26567	29903	M	K15N	SNP	Membrane	M:K15N	G26567T
EPI_ISL_465556	26567	G	T	26567	29903	M	K15N	SNP	Membrane	M:K15N	G26567T
EPI_ISL_465557	26567	G	T	26567	29903	M	K15N	SNP	Membrane	M:K15N	G26567T
EPI_ISL_465558	26567	G	T	26567	29903	M	K15N	SNP	Membrane	M:K15N	G26567T
EPI_ISL_451858	26568	C	A	26568	29903	M	L16I	SNP	Membrane	M:L16I	C26568A
EPI_ISL_418112	26568	C	T	26556	29831	M	L16F	SNP	Membrane	M:L16F	C26568T
EPI_ISL_454897	26568	C	T	26568	29903	M	L16F	SNP	Membrane	M:L16F	C26568T
EPI_ISL_472298	26568	C	T	26561	29896	M	L16F	SNP	Membrane	M:L16F	C26568T
EPI_ISL_451604	26568	C	T	26302	29408	M	L16F	SNP	Membrane	M:L16F	C26568T
EPI_ISL_461542	26570	C	T	26570	29903	M	L16L	SNP_silent	Membrane	M:L16L	C26570T
EPI_ISL_470689	26570	C	T	26534	29842	M	L16L	SNP_silent	Membrane	M:L16L	C26570T
EPI_ISL_449617	26571	C	T	26571	29903	M	L17F	SNP	Membrane	M:L17F	C26571T
EPI_ISL_450495	26571	C	A	26571	29903	M	L17I	SNP	Membrane	M:L17I	C26571A
EPI_ISL_452283	26571	C	T	26571	29901	M	L17F	SNP	Membrane	M:L17F	C26571T
EPI_ISL_463139	26571	C	T	26517	29782	M	L17F	SNP	Membrane	M:L17F	C26571T
EPI_ISL_454966	26571	C	T	26509	29840	M	L17F	SNP	Membrane	M:L17F	C26571T
EPI_ISL_434078	26573	T	C	26573	29903	M	L17L	SNP_silent	Membrane	M:L17L	T26573C
EPI_ISL_456032	26577	C	G	26577	29903	M	Q19E	SNP	Membrane	M:Q19E	C26577G
EPI_ISL_443744	26579	A	T	26525	29849	M	Q19H	SNP	Membrane	M:Q19H	A26579T
EPI_ISL_471692	26585	C	T	26585	29903	M	N21N	SNP_silent	Membrane	M:N21N	C26585T
EPI_ISL_431118	26589	G	T	26569	29844	M	V23L	SNP	Membrane	M:V23L	G26589T
EPI_ISL_473190	26589	G	T	26577	29891	M	V23L	SNP	Membrane	M:V23L	G26589T
EPI_ISL_473007	26589	G	T	26552	29866	M	V23L	SNP	Membrane	M:V23L	G26589T
EPI_ISL_430050	26589	G	T	26585	29899	M	V23L	SNP	Membrane	M:V23L	G26589T
EPI_ISL_433803	26589	G	C	26589	29903	M	V23L	SNP	Membrane	M:V23L	G26589C
EPI_ISL_438615	26589	G	C	26589	29903	M	V23L	SNP	Membrane	M:V23L	G26589C
EPI_ISL_441111	26589	G	C	26535	29808	M	V23L	SNP	Membrane	M:V23L	G26589C
EPI_ISL_442047	26589	G	C	26535	29812	M	V23L	SNP	Membrane	M:V23L	G26589C
EPI_ISL_443412	26589	G	C	26535	29849	M	V23L	SNP	Membrane	M:V23L	G26589C
EPI_ISL_450078	26589	G	T	26525	29715	M	V23L	SNP	Membrane	M:V23L	G26589T
EPI_ISL_452889	26589	G	C	26589	29903	M	V23L	SNP	Membrane	M:V23L	G26589C
EPI_ISL_456736	26589	G	C	26589	29903	M	V23L	SNP	Membrane	M:V23L	G26589C
EPI_ISL_461567	26589	G	C	26589	29903	M	V23L	SNP	Membrane	M:V23L	G26589C
EPI_ISL_464932	26589	G	C	26589	29903	M	V23L	SNP	Membrane	M:V23L	G26589C
EPI_ISL_469447	26589	G	T	26535	29782	M	V23L	SNP	Membrane	M:V23L	G26589T
EPI_ISL_469924	26589	G	T	26535	29782	M	V23L	SNP	Membrane	M:V23L	G26589T
EPI_ISL_470126	26589	G	C	26535	29782	M	V23L	SNP	Membrane	M:V23L	G26589C
EPI_ISL_472445	26589	G	T	26588	29902	M	V23L	SNP	Membrane	M:V23L	G26589T
EPI_ISL_472532	26589	G	T	26585	29899	M	V23L	SNP	Membrane	M:V23L	G26589T
EPI_ISL_472630	26589	G	T	26589	29903	M	V23L	SNP	Membrane	M:V23L	G26589T
EPI_ISL_472692	26589	G	T	26589	29903	M	V23L	SNP	Membrane	M:V23L	G26589T
EPI_ISL_472760	26589	G	T	26587	29901	M	V23L	SNP	Membrane	M:V23L	G26589T
EPI_ISL_472765	26589	G	T	26581	29895	M	V23L	SNP	Membrane	M:V23L	G26589T
EPI_ISL_472778	26589	G	T	26585	29899	M	V23L	SNP	Membrane	M:V23L	G26589T
EPI_ISL_472790	26589	G	T	26589	29903	M	V23L	SNP	Membrane	M:V23L	G26589T
EPI_ISL_472804	26589	G	T	26553	29867	M	V23L	SNP	Membrane	M:V23L	G26589T
EPI_ISL_472879	26589	G	T	26589	29903	M	V23L	SNP	Membrane	M:V23L	G26589T
EPI_ISL_472885	26589	G	T	26559	29873	M	V23L	SNP	Membrane	M:V23L	G26589T
EPI_ISL_472895	26589	G	T	26587	29901	M	V23L	SNP	Membrane	M:V23L	G26589T
EPI_ISL_472897	26589	G	T	26553	29867	M	V23L	SNP	Membrane	M:V23L	G26589T
EPI_ISL_472904	26589	G	T	26584	29898	M	V23L	SNP	Membrane	M:V23L	G26589T
EPI_ISL_472906	26589	G	T	26581	29895	M	V23L	SNP	Membrane	M:V23L	G26589T
EPI_ISL_472916	26589	G	T	26587	29901	M	V23L	SNP	Membrane	M:V23L	G26589T
EPI_ISL_472926	26589	G	T	26554	29868	M	V23L	SNP	Membrane	M:V23L	G26589T
EPI_ISL_472927	26589	G	T	26580	29894	M	V23L	SNP	Membrane	M:V23L	G26589T
EPI_ISL_472938	26589	G	T	26579	29893	M	V23L	SNP	Membrane	M:V23L	G26589T
EPI_ISL_472958	26589	G	T	26585	29899	M	V23L	SNP	Membrane	M:V23L	G26589T
EPI_ISL_472964	26589	G	T	26552	29866	M	V23L	SNP	Membrane	M:V23L	G26589T
EPI_ISL_472966	26589	G	T	26580	29894	M	V23L	SNP	Membrane	M:V23L	G26589T
EPI_ISL_473015	26589	G	T	26585	29899	M	V23L	SNP	Membrane	M:V23L	G26589T
EPI_ISL_473023	26589	G	T	26553	29867	M	V23L	SNP	Membrane	M:V23L	G26589T
EPI_ISL_473029	26589	G	T	26559	29873	M	V23L	SNP	Membrane	M:V23L	G26589T
EPI_ISL_473038	26589	G	T	26589	29903	M	V23L	SNP	Membrane	M:V23L	G26589T
EPI_ISL_473039	26589	G	T	26589	29903	M	V23L	SNP	Membrane	M:V23L	G26589T
EPI_ISL_473060	26589	G	T	26556	29870	M	V23L	SNP	Membrane	M:V23L	G26589T
EPI_ISL_473062	26589	G	T	26585	29899	M	V23L	SNP	Membrane	M:V23L	G26589T
EPI_ISL_473072	26589	G	T	26556	29870	M	V23L	SNP	Membrane	M:V23L	G26589T
EPI_ISL_473076	26589	G	T	26552	29866	M	V23L	SNP	Membrane	M:V23L	G26589T
EPI_ISL_473093	26589	G	T	26551	29865	M	V23L	SNP	Membrane	M:V23L	G26589T
EPI_ISL_473112	26589	G	T	26554	29868	M	V23L	SNP	Membrane	M:V23L	G26589T
EPI_ISL_473113	26589	G	T	26551	29865	M	V23L	SNP	Membrane	M:V23L	G26589T
EPI_ISL_473146	26589	G	T	26589	29903	M	V23L	SNP	Membrane	M:V23L	G26589T
EPI_ISL_473156	26589	G	T	26551	29865	M	V23L	SNP	Membrane	M:V23L	G26589T
EPI_ISL_473157	26589	G	T	26552	29866	M	V23L	SNP	Membrane	M:V23L	G26589T
EPI_ISL_473168	26589	G	T	26588	29902	M	V23L	SNP	Membrane	M:V23L	G26589T
EPI_ISL_473174	26589	G	T	26551	29865	M	V23L	SNP	Membrane	M:V23L	G26589T
EPI_ISL_473175	26589	G	T	26553	29867	M	V23L	SNP	Membrane	M:V23L	G26589T
EPI_ISL_473180	26589	G	T	26552	29866	M	V23L	SNP	Membrane	M:V23L	G26589T
EPI_ISL_473198	26589	G	T	26586	29900	M	V23L	SNP	Membrane	M:V23L	G26589T
EPI_ISL_473201	26589	G	T	26553	29867	M	V23L	SNP	Membrane	M:V23L	G26589T
EPI_ISL_473209	26589	G	T	26553	29856	M	V23L	SNP	Membrane	M:V23L	G26589T
EPI_ISL_473230	26589	G	T	26589	29903	M	V23L	SNP	Membrane	M:V23L	G26589T
EPI_ISL_473233	26589	G	T	26559	29867	M	V23L	SNP	Membrane	M:V23L	G26589T
EPI_ISL_473236	26589	G	T	26586	29900	M	V23L	SNP	Membrane	M:V23L	G26589T
EPI_ISL_473241	26589	G	T	26588	29902	M	V23L	SNP	Membrane	M:V23L	G26589T
EPI_ISL_473248	26589	G	T	26578	29892	M	V23L	SNP	Membrane	M:V23L	G26589T
EPI_ISL_473264	26589	G	T	26586	29900	M	V23L	SNP	Membrane	M:V23L	G26589T
EPI_ISL_473269	26589	G	T	26553	29867	M	V23L	SNP	Membrane	M:V23L	G26589T
EPI_ISL_473272	26589	G	T	26585	29899	M	V23L	SNP	Membrane	M:V23L	G26589T
EPI_ISL_473298	26589	G	T	26552	29866	M	V23L	SNP	Membrane	M:V23L	G26589T
EPI_ISL_474008	26589	G	T	26573	29887	M	V23L	SNP	Membrane	M:V23L	G26589T
EPI_ISL_474009	26589	G	T	26580	29894	M	V23L	SNP	Membrane	M:V23L	G26589T
EPI_ISL_474010	26589	G	T	26558	29872	M	V23L	SNP	Membrane	M:V23L	G26589T
EPI_ISL_474014	26589	G	T	26552	29866	M	V23L	SNP	Membrane	M:V23L	G26589T
EPI_ISL_474076	26589	G	T	26554	29868	M	V23L	SNP	Membrane	M:V23L	G26589T
EPI_ISL_474123	26589	G	T	26585	29899	M	V23L	SNP	Membrane	M:V23L	G26589T
EPI_ISL_474167	26589	G	T	26585	29899	M	V23L	SNP	Membrane	M:V23L	G26589T
EPI_ISL_474177	26589	G	T	26566	29880	M	V23L	SNP	Membrane	M:V23L	G26589T
EPI_ISL_474183	26589	G	T	26587	29901	M	V23L	SNP	Membrane	M:V23L	G26589T
EPI_ISL_474193	26589	G	T	26585	29899	M	V23L	SNP	Membrane	M:V23L	G26589T
EPI_ISL_474206	26589	G	T	26581	29895	M	V23L	SNP	Membrane	M:V23L	G26589T
EPI_ISL_474212	26589	G	T	26559	29873	M	V23L	SNP	Membrane	M:V23L	G26589T
EPI_ISL_474639	26589	G	T	26589	29903	M	V23L	SNP	Membrane	M:V23L	G26589T
EPI_ISL_473105	26589	G	T	26587	29901	M	V23L	SNP	Membrane	M:V23L	G26589T
EPI_ISL_472752	26589	G	T	26585	29899	M	V23L	SNP	Membrane	M:V23L	G26589T
EPI_ISL_460852	26591	A	G	26534	29772	M	V23V	SNP_silent	Membrane	M:V23V	A26591G
EPI_ISL_447349	26593	T	C	26594	29892	M	I24T	SNP	Membrane	M:I24T	T26593C
EPI_ISL_417088	26596	G	T	26596	29903	M	G25V	SNP	Membrane	M:G25V	G26596T
EPI_ISL_435684	26598	T	C	26569	29833	M	F26L	SNP	Membrane	M:F26L	T26598C
EPI_ISL_464161	26600	C	T	26600	29903	M	F26F	SNP_silent	Membrane	M:F26F	C26600T
EPI_ISL_454828	26601	C	T	26576	29834	M	F26F	SNP_silent	Membrane	M:F26F	C26601T
EPI_ISL_435612	26601	C	T	26601	29903	M	F26F	SNP_silent	Membrane	M:F26F	C26601T
EPI_ISL_472066	26606	C	T	26595	29892	M	F28F	SNP_silent	Membrane	M:F28F	C26606T
EPI_ISL_460191	26606	C	T	26600	29881	M	F28F	SNP_silent	Membrane	M:F28F	C26606T
EPI_ISL_437128	26606	C	T	26606	29903	M	F28F	SNP_silent	Membrane	M:F28F	C26606T
EPI_ISL_449256	26606	C	T	26552	29782	M	F28F	SNP_silent	Membrane	M:F28F	C26606T
EPI_ISL_472014	26606	C	T	26606	29903	M	F28F	SNP_silent	Membrane	M:F28F	C26606T
EPI_ISL_472018	26606	C	T	26606	29903	M	F28F	SNP_silent	Membrane	M:F28F	C26606T
EPI_ISL_472021	26606	C	T	26606	29903	M	F28F	SNP_silent	Membrane	M:F28F	C26606T
EPI_ISL_472027	26606	C	T	26597	29894	M	F28F	SNP_silent	Membrane	M:F28F	C26606T
EPI_ISL_472031	26606	C	T	26598	29858	M	F28F	SNP_silent	Membrane	M:F28F	C26606T
EPI_ISL_472033	26606	C	T	26577	29872	M	F28F	SNP_silent	Membrane	M:F28F	C26606T
EPI_ISL_472044	26606	C	T	26604	29901	M	F28F	SNP_silent	Membrane	M:F28F	C26606T
EPI_ISL_472055	26606	C	T	26576	29864	M	F28F	SNP_silent	Membrane	M:F28F	C26606T
EPI_ISL_472057	26606	C	T	26576	29836	M	F28F	SNP_silent	Membrane	M:F28F	C26606T
EPI_ISL_472060	26606	C	T	26597	29857	M	F28F	SNP_silent	Membrane	M:F28F	C26606T
EPI_ISL_472081	26606	C	T	26576	29836	M	F28F	SNP_silent	Membrane	M:F28F	C26606T
EPI_ISL_472085	26606	C	T	26577	29874	M	F28F	SNP_silent	Membrane	M:F28F	C26606T
EPI_ISL_472088	26606	C	T	26600	29885	M	F28F	SNP_silent	Membrane	M:F28F	C26606T
EPI_ISL_472106	26606	C	T	26606	29903	M	F28F	SNP_silent	Membrane	M:F28F	C26606T
EPI_ISL_472122	26606	C	T	26606	29903	M	F28F	SNP_silent	Membrane	M:F28F	C26606T
EPI_ISL_472130	26606	C	T	26578	29875	M	F28F	SNP_silent	Membrane	M:F28F	C26606T
EPI_ISL_472131	26606	C	T	26577	29874	M	F28F	SNP_silent	Membrane	M:F28F	C26606T
EPI_ISL_426765	26606	C	T	26606	29903	M	F28F	SNP_silent	Membrane	M:F28F	C26606T
EPI_ISL_437907	26606	C	T	26581	29818	M	F28F	SNP_silent	Membrane	M:F28F	C26606T
EPI_ISL_433647	26606	C	T	26552	29782	M	F28F	SNP_silent	Membrane	M:F28F	C26606T
EPI_ISL_468021	26606	C	T	26600	29897	M	F28F	SNP_silent	Membrane	M:F28F	C26606T
EPI_ISL_432916	26607	C	T	26607	29903	M	L29F	SNP	Membrane	M:L29F	C26607T
EPI_ISL_433828	26607	C	T	26607	29903	M	L29F	SNP	Membrane	M:L29F	C26607T
EPI_ISL_441611	26607	C	T	26553	29849	M	L29F	SNP	Membrane	M:L29F	C26607T
EPI_ISL_442078	26607	C	T	26607	29903	M	L29F	SNP	Membrane	M:L29F	C26607T
EPI_ISL_452954	26607	C	T	26607	29903	M	L29F	SNP	Membrane	M:L29F	C26607T
EPI_ISL_452988	26607	C	T	26607	29903	M	L29F	SNP	Membrane	M:L29F	C26607T
EPI_ISL_456688	26607	C	T	26607	29903	M	L29F	SNP	Membrane	M:L29F	C26607T
EPI_ISL_461485	26607	C	T	26607	29903	M	L29F	SNP	Membrane	M:L29F	C26607T
EPI_ISL_433959	26609	T	C	26609	29903	M	L29L	SNP_silent	Membrane	M:L29L	T26609C
EPI_ISL_454647	26609	T	C	26609	29882	M	L29L	SNP_silent	Membrane	M:L29L	T26609C
EPI_ISL_473336	26612	A	G	26612	29903	M	T30T	SNP_silent	Membrane	M:T30T	A26612G
EPI_ISL_473375	26612	A	G	26612	29903	M	T30T	SNP_silent	Membrane	M:T30T	A26612G
EPI_ISL_436284	26612	A	G	26563	29804	M	T30T	SNP_silent	Membrane	M:T30T	A26612G
EPI_ISL_447482	26612	A	G	26565	29789	M	T30T	SNP_silent	Membrane	M:T30T	A26612G
EPI_ISL_447486	26612	A	G	26565	29639	M	T30T	SNP_silent	Membrane	M:T30T	A26612G
EPI_ISL_455722	26612	A	G	26565	29789	M	T30T	SNP_silent	Membrane	M:T30T	A26612G
EPI_ISL_425561	26612	A	T	26612	29903	M	T30T	SNP_silent	Membrane	M:T30T	A26612T
EPI_ISL_433051	26612	A	T	26612	29903	M	T30T	SNP_silent	Membrane	M:T30T	A26612T
EPI_ISL_433327	26615	G	T	26615	29903	M	W31C	SNP	Membrane	M:W31C	G26615T
EPI_ISL_433544	26615	G	T	26561	29782	M	W31C	SNP	Membrane	M:W31C	G26615T
EPI_ISL_433601	26615	G	T	26561	29782	M	W31C	SNP	Membrane	M:W31C	G26615T
EPI_ISL_433648	26615	G	T	26561	29782	M	W31C	SNP	Membrane	M:W31C	G26615T
EPI_ISL_433656	26615	G	T	26561	29782	M	W31C	SNP	Membrane	M:W31C	G26615T
EPI_ISL_438792	26615	G	T	26561	29782	M	W31C	SNP	Membrane	M:W31C	G26615T
EPI_ISL_438818	26615	G	T	26561	29782	M	W31C	SNP	Membrane	M:W31C	G26615T
EPI_ISL_438864	26615	G	T	26561	29782	M	W31C	SNP	Membrane	M:W31C	G26615T
EPI_ISL_438923	26615	G	T	26561	29782	M	W31C	SNP	Membrane	M:W31C	G26615T
EPI_ISL_438944	26615	G	T	26561	29782	M	W31C	SNP	Membrane	M:W31C	G26615T
EPI_ISL_439000	26615	G	T	26561	29782	M	W31C	SNP	Membrane	M:W31C	G26615T
EPI_ISL_439006	26615	G	T	26561	29782	M	W31C	SNP	Membrane	M:W31C	G26615T
EPI_ISL_439160	26615	G	T	26615	29903	M	W31C	SNP	Membrane	M:W31C	G26615T
EPI_ISL_439228	26615	G	T	26615	29903	M	W31C	SNP	Membrane	M:W31C	G26615T
EPI_ISL_439249	26615	G	T	26615	29903	M	W31C	SNP	Membrane	M:W31C	G26615T
EPI_ISL_441299	26615	G	T	26561	29849	M	W31C	SNP	Membrane	M:W31C	G26615T
EPI_ISL_449209	26615	G	T	26561	29782	M	W31C	SNP	Membrane	M:W31C	G26615T
EPI_ISL_449268	26615	G	T	26615	29903	M	W31C	SNP	Membrane	M:W31C	G26615T
EPI_ISL_453035	26615	G	T	26615	29903	M	W31C	SNP	Membrane	M:W31C	G26615T
EPI_ISL_453036	26615	G	T	26615	29903	M	W31C	SNP	Membrane	M:W31C	G26615T
EPI_ISL_453077	26615	G	T	26561	29782	M	W31C	SNP	Membrane	M:W31C	G26615T
EPI_ISL_456758	26615	G	T	26561	29782	M	W31C	SNP	Membrane	M:W31C	G26615T
EPI_ISL_456766	26615	G	T	26561	29782	M	W31C	SNP	Membrane	M:W31C	G26615T
EPI_ISL_456778	26615	G	T	26561	29782	M	W31C	SNP	Membrane	M:W31C	G26615T
EPI_ISL_456779	26615	G	T	26561	29782	M	W31C	SNP	Membrane	M:W31C	G26615T
EPI_ISL_456837	26615	G	T	26561	29782	M	W31C	SNP	Membrane	M:W31C	G26615T
EPI_ISL_456879	26615	G	T	26561	29782	M	W31C	SNP	Membrane	M:W31C	G26615T
EPI_ISL_459103	26615	G	T	26561	29782	M	W31C	SNP	Membrane	M:W31C	G26615T
EPI_ISL_459118	26615	G	T	26561	29782	M	W31C	SNP	Membrane	M:W31C	G26615T
EPI_ISL_459684	26615	G	T	26561	29782	M	W31C	SNP	Membrane	M:W31C	G26615T
EPI_ISL_461589	26615	G	T	26615	29903	M	W31C	SNP	Membrane	M:W31C	G26615T
EPI_ISL_461592	26615	G	T	26615	29903	M	W31C	SNP	Membrane	M:W31C	G26615T
EPI_ISL_461622	26615	G	T	26615	29903	M	W31C	SNP	Membrane	M:W31C	G26615T
EPI_ISL_461642	26615	G	T	26561	29782	M	W31C	SNP	Membrane	M:W31C	G26615T
EPI_ISL_461655	26615	G	T	26561	29782	M	W31C	SNP	Membrane	M:W31C	G26615T
EPI_ISL_461657	26615	G	T	26561	29782	M	W31C	SNP	Membrane	M:W31C	G26615T
EPI_ISL_461658	26615	G	T	26561	29782	M	W31C	SNP	Membrane	M:W31C	G26615T
EPI_ISL_461667	26615	G	T	26561	29782	M	W31C	SNP	Membrane	M:W31C	G26615T
EPI_ISL_461681	26615	G	T	26561	29782	M	W31C	SNP	Membrane	M:W31C	G26615T
EPI_ISL_461685	26615	G	T	26561	29782	M	W31C	SNP	Membrane	M:W31C	G26615T
EPI_ISL_461687	26615	G	T	26561	29782	M	W31C	SNP	Membrane	M:W31C	G26615T
EPI_ISL_473527	26615	G	T	26561	29782	M	W31C	SNP	Membrane	M:W31C	G26615T
EPI_ISL_473557	26615	G	T	26615	29903	M	W31C	SNP	Membrane	M:W31C	G26615T
EPI_ISL_473558	26615	G	T	26615	29903	M	W31C	SNP	Membrane	M:W31C	G26615T
EPI_ISL_473603	26615	G	T	26561	29782	M	W31C	SNP	Membrane	M:W31C	G26615T
EPI_ISL_473746	26615	G	T	26561	29782	M	W31C	SNP	Membrane	M:W31C	G26615T
EPI_ISL_473815	26615	G	T	26615	29903	M	W31C	SNP	Membrane	M:W31C	G26615T
EPI_ISL_467299	26616	A	T	26618	29868	M	I32F	SNP	Membrane	M:I32F	A26616T
EPI_ISL_449605	26620	G	T	26620	29903	M	C33F	SNP	Membrane	M:C33F	G26620T
EPI_ISL_456517	26620	G	T	26614	29897	M	C33F	SNP	Membrane	M:C33F	G26620T
EPI_ISL_461309	26620	G	T	26566	29775	M	C33F	SNP	Membrane	M:C33F	G26620T
EPI_ISL_461587	26620	G	C	26620	29903	M	C33S	SNP	Membrane	M:C33S	G26620C
EPI_ISL_473477	26620	G	C	26620	29903	M	C33S	SNP	Membrane	M:C33S	G26620C
EPI_ISL_417653	26620	G	T	26620	29903	M	C33F	SNP	Membrane	M:C33F	G26620T
EPI_ISL_443094	26620	G	T	26566	29782	M	C33F	SNP	Membrane	M:C33F	G26620T
EPI_ISL_438707	26622	C	T	26622	29903	M	L34F	SNP	Membrane	M:L34F	C26622T
EPI_ISL_443347	26622	C	T	26568	29841	M	L34F	SNP	Membrane	M:L34F	C26622T
EPI_ISL_448097	26622	C	T	26622	29903	M	L34F	SNP	Membrane	M:L34F	C26622T
EPI_ISL_452598	26622	C	T	26619	29900	M	L34F	SNP	Membrane	M:L34F	C26622T
EPI_ISL_470112	26622	C	T	26568	29782	M	L34F	SNP	Membrane	M:L34F	C26622T
EPI_ISL_470165	26622	C	T	26568	29782	M	L34F	SNP	Membrane	M:L34F	C26622T
EPI_ISL_470216	26622	C	T	26568	29782	M	L34F	SNP	Membrane	M:L34F	C26622T
EPI_ISL_422177	26622	C	T	26615	29896	M	L34F	SNP	Membrane	M:L34F	C26622T
EPI_ISL_430967	26625	C	T	26595	29884	M	L34L	SNP_silent	Membrane	M:L34L	C26625T
EPI_ISL_417516	26625	C	T	26571	29782	M	L34L	SNP_silent	Membrane	M:L34L	C26625T
EPI_ISL_421432	26625	C	T	26570	29724	M	L34L	SNP_silent	Membrane	M:L34L	C26625T
EPI_ISL_423971	26625	C	T	26625	29903	M	L34L	SNP_silent	Membrane	M:L34L	C26625T
EPI_ISL_426299	26625	C	T	26600	29822	M	L34L	SNP_silent	Membrane	M:L34L	C26625T
EPI_ISL_426799	26625	C	T	26625	29903	M	L34L	SNP_silent	Membrane	M:L34L	C26625T
EPI_ISL_426809	26625	C	T	26625	29903	M	L34L	SNP_silent	Membrane	M:L34L	C26625T
EPI_ISL_426940	26625	C	T	26625	29903	M	L34L	SNP_silent	Membrane	M:L34L	C26625T
EPI_ISL_427006	26625	C	T	26625	29903	M	L34L	SNP_silent	Membrane	M:L34L	C26625T
EPI_ISL_427160	26625	C	T	26625	29903	M	L34L	SNP_silent	Membrane	M:L34L	C26625T
EPI_ISL_427185	26625	C	T	26594	29871	M	L34L	SNP_silent	Membrane	M:L34L	C26625T
EPI_ISL_427479	26625	C	T	26625	29903	M	L34L	SNP_silent	Membrane	M:L34L	C26625T
EPI_ISL_427487	26625	C	T	26625	29903	M	L34L	SNP_silent	Membrane	M:L34L	C26625T
EPI_ISL_428991	26625	C	T	26625	29903	M	L34L	SNP_silent	Membrane	M:L34L	C26625T
EPI_ISL_430330	26625	C	T	26625	29903	M	L34L	SNP_silent	Membrane	M:L34L	C26625T
EPI_ISL_430380	26625	C	T	26625	29903	M	L34L	SNP_silent	Membrane	M:L34L	C26625T
EPI_ISL_436481	26625	C	T	26625	29840	M	L34L	SNP_silent	Membrane	M:L34L	C26625T
EPI_ISL_436810	26625	C	T	26625	29898	M	L34L	SNP_silent	Membrane	M:L34L	C26625T
EPI_ISL_444725	26625	C	T	26625	29903	M	L34L	SNP_silent	Membrane	M:L34L	C26625T
EPI_ISL_449326	26625	C	T	26625	29903	M	L34L	SNP_silent	Membrane	M:L34L	C26625T
EPI_ISL_450168	26625	C	T	26576	29730	M	L34L	SNP_silent	Membrane	M:L34L	C26625T
EPI_ISL_450619	26625	C	T	26625	29856	M	L34L	SNP_silent	Membrane	M:L34L	C26625T
EPI_ISL_454368	26625	C	T	26625	29840	M	L34L	SNP_silent	Membrane	M:L34L	C26625T
EPI_ISL_454382	26625	C	T	26625	29840	M	L34L	SNP_silent	Membrane	M:L34L	C26625T
EPI_ISL_454811	26625	C	T	26600	29834	M	L34L	SNP_silent	Membrane	M:L34L	C26625T
EPI_ISL_456217	26625	C	T	26625	29903	M	L34L	SNP_silent	Membrane	M:L34L	C26625T
EPI_ISL_456383	26625	C	T	26625	29903	M	L34L	SNP_silent	Membrane	M:L34L	C26625T
EPI_ISL_460015	26625	C	T	26625	29903	M	L34L	SNP_silent	Membrane	M:L34L	C26625T
EPI_ISL_460016	26625	C	T	26625	29903	M	L34L	SNP_silent	Membrane	M:L34L	C26625T
EPI_ISL_460118	26625	C	T	26603	29853	M	L34L	SNP_silent	Membrane	M:L34L	C26625T
EPI_ISL_460270	26625	C	T	26587	29816	M	L34L	SNP_silent	Membrane	M:L34L	C26625T
EPI_ISL_463166	26625	C	T	26571	29782	M	L34L	SNP_silent	Membrane	M:L34L	C26625T
EPI_ISL_466514	26625	C	T	26625	29903	M	L34L	SNP_silent	Membrane	M:L34L	C26625T
EPI_ISL_467394	26625	C	T	26625	29903	M	L34L	SNP_silent	Membrane	M:L34L	C26625T
EPI_ISL_467413	26625	C	T	26625	29903	M	L34L	SNP_silent	Membrane	M:L34L	C26625T
EPI_ISL_469240	26625	C	T	26571	29735	M	L34L	SNP_silent	Membrane	M:L34L	C26625T
EPI_ISL_471241	26625	C	T	26571	29782	M	L34L	SNP_silent	Membrane	M:L34L	C26625T
EPI_ISL_471720	26625	C	T	26625	29881	M	L34L	SNP_silent	Membrane	M:L34L	C26625T
EPI_ISL_471790	26625	C	T	26625	29864	M	L34L	SNP_silent	Membrane	M:L34L	C26625T
EPI_ISL_435058	26631	T	A	26631	29903	M	F37I	SNP	Membrane	M:F37I	T26631A
EPI_ISL_434610	26634	G	T	26580	29782	M	A38S	SNP	Membrane	M:A38S	G26634T
EPI_ISL_460634	26634	G	C	26438	29534	M	A38P	SNP	Membrane	M:A38P	G26634C
EPI_ISL_454435	26635	C	.	26628	29849	M	A38	deletion_frameshift	Membrane	M:A38	C26635.
EPI_ISL_454521	26636	C	T	26636	29903	M	A38A	SNP_silent	Membrane	M:A38A	C26636T
EPI_ISL_433316	26636	C	T	26573	29773	M	A38A	SNP_silent	Membrane	M:A38A	C26636T
EPI_ISL_425709	26640	G	T	26586	29782	M	A40S	SNP	Membrane	M:A40S	G26640T
EPI_ISL_425791	26640	G	T	26586	29782	M	A40S	SNP	Membrane	M:A40S	G26640T
EPI_ISL_425817	26640	G	T	26586	29782	M	A40S	SNP	Membrane	M:A40S	G26640T
EPI_ISL_444084	26640	G	T	26640	29903	M	A40S	SNP	Membrane	M:A40S	G26640T
EPI_ISL_468236	26640	G	T	26640	29903	M	A40S	SNP	Membrane	M:A40S	G26640T
EPI_ISL_413018	26640	G	T	26628	29858	M	A40S	SNP	Membrane	M:A40S	G26640T
EPI_ISL_413017	26640	G	T	26640	29903	M	A40S	SNP	Membrane	M:A40S	G26640T
EPI_ISL_421256	26640	G	T	26616	29867	M	A40S	SNP	Membrane	M:A40S	G26640T
EPI_ISL_436105	26641	C	A	26638	29911	M	A40D	SNP	Membrane	M:A40D	C26641A
EPI_ISL_429814	26641	C	T	26587	29783	M	A40V	SNP	Membrane	M:A40V	C26641T
EPI_ISL_419308	26642	C	T	26565	29766	M	A40A	SNP_silent	Membrane	M:A40A	C26642T
EPI_ISL_450139	26642	C	A	26582	29719	M	A40A	SNP_silent	Membrane	M:A40A	C26642A
EPI_ISL_461148	26642	C	T	26585	29772	M	A40A	SNP_silent	Membrane	M:A40A	C26642T
EPI_ISL_417034	26642	C	T	26596	29789	M	A40A	SNP_silent	Membrane	M:A40A	C26642T
EPI_ISL_439134	26645	C	T	26591	29782	M	N41N	SNP_silent	Membrane	M:N41N	C26645T
EPI_ISL_446258	26645	C	T	26607	29865	M	N41N	SNP_silent	Membrane	M:N41N	C26645T
EPI_ISL_449242	26645	C	T	26591	29782	M	N41N	SNP_silent	Membrane	M:N41N	C26645T
EPI_ISL_455223	26645	C	T	26591	29775	M	N41N	SNP_silent	Membrane	M:N41N	C26645T
EPI_ISL_455459	26645	C	T	26645	29806	M	N41N	SNP_silent	Membrane	M:N41N	C26645T
EPI_ISL_460699	26645	C	T	26591	29775	M	N41N	SNP_silent	Membrane	M:N41N	C26645T
EPI_ISL_462846	26645	C	T	26629	29843	M	N41N	SNP_silent	Membrane	M:N41N	C26645T
EPI_ISL_462847	26645	C	T	26607	29822	M	N41N	SNP_silent	Membrane	M:N41N	C26645T
EPI_ISL_462848	26645	C	T	26618	29830	M	N41N	SNP_silent	Membrane	M:N41N	C26645T
EPI_ISL_462849	26645	C	T	26610	29820	M	N41N	SNP_silent	Membrane	M:N41N	C26645T
EPI_ISL_462850	26645	C	T	26607	29815	M	N41N	SNP_silent	Membrane	M:N41N	C26645T
EPI_ISL_462851	26645	C	T	26607	29815	M	N41N	SNP_silent	Membrane	M:N41N	C26645T
EPI_ISL_462854	26645	C	T	26607	29800	M	N41N	SNP_silent	Membrane	M:N41N	C26645T
EPI_ISL_462856	26645	C	T	26611	29826	M	N41N	SNP_silent	Membrane	M:N41N	C26645T
EPI_ISL_462857	26645	C	T	26607	29817	M	N41N	SNP_silent	Membrane	M:N41N	C26645T
EPI_ISL_462858	26645	C	T	26607	29815	M	N41N	SNP_silent	Membrane	M:N41N	C26645T
EPI_ISL_462859	26645	C	T	26607	29770	M	N41N	SNP_silent	Membrane	M:N41N	C26645T
EPI_ISL_462860	26645	C	T	26641	29858	M	N41N	SNP_silent	Membrane	M:N41N	C26645T
EPI_ISL_462863	26645	C	T	26609	29650	M	N41N	SNP_silent	Membrane	M:N41N	C26645T
EPI_ISL_462864	26645	C	T	26641	29856	M	N41N	SNP_silent	Membrane	M:N41N	C26645T
EPI_ISL_462887	26645	C	T	26608	29823	M	N41N	SNP_silent	Membrane	M:N41N	C26645T
EPI_ISL_462888	26645	C	T	26615	29827	M	N41N	SNP_silent	Membrane	M:N41N	C26645T
EPI_ISL_462889	26645	C	T	26607	29823	M	N41N	SNP_silent	Membrane	M:N41N	C26645T
EPI_ISL_462890	26645	C	T	26607	29823	M	N41N	SNP_silent	Membrane	M:N41N	C26645T
EPI_ISL_462910	26645	C	T	26604	29818	M	N41N	SNP_silent	Membrane	M:N41N	C26645T
EPI_ISL_463472	26645	C	T	26645	29903	M	N41N	SNP_silent	Membrane	M:N41N	C26645T
EPI_ISL_473811	26645	C	T	26645	29903	M	N41N	SNP_silent	Membrane	M:N41N	C26645T
EPI_ISL_470074	26645	C	T	26591	29782	M	N41N	SNP_silent	Membrane	M:N41N	C26645T
EPI_ISL_472739	26645	C	T	26631	29889	M	N41N	SNP_silent	Membrane	M:N41N	C26645T
EPI_ISL_459493	26647	G	A	26593	29782	M	R42K	SNP	Membrane	M:R42K	G26647A
EPI_ISL_462461	26648	G	A	26635	29860	M	R42R	SNP_silent	Membrane	M:R42R	G26648A
EPI_ISL_453187	26648	G	A	26648	29903	M	R42R	SNP_silent	Membrane	M:R42R	G26648A
EPI_ISL_428907	26650	A	G	26650	29903	M	N43S	SNP	Membrane	M:N43S	A26650G
EPI_ISL_435058	26651	T	A	26651	29903	M	N43K	SNP	Membrane	M:N43K	T26651A
EPI_ISL_445953	26657	T	C	26653	29899	M	F45F	SNP_silent	Membrane	M:F45F	T26657C
EPI_ISL_422714	26660	G	T	26606	29775	M	L46F	SNP	Membrane	M:L46F	G26660T
EPI_ISL_422735	26660	G	T	26606	29775	M	L46F	SNP	Membrane	M:L46F	G26660T
EPI_ISL_448951	26660	G	A	26622	29865	M	L46L	SNP_silent	Membrane	M:L46L	G26660A
EPI_ISL_448955	26660	G	A	26624	29867	M	L46L	SNP_silent	Membrane	M:L46L	G26660A
EPI_ISL_454398	26660	G	T	26660	29840	M	L46F	SNP	Membrane	M:L46F	G26660T
EPI_ISL_461169	26660	G	T	26606	29775	M	L46F	SNP	Membrane	M:L46F	G26660T
EPI_ISL_461174	26660	G	T	26606	29775	M	L46F	SNP	Membrane	M:L46F	G26660T
EPI_ISL_461787	26660	G	A	26660	29903	M	L46L	SNP_silent	Membrane	M:L46L	G26660A
EPI_ISL_472151	26660	G	A	26660	29903	M	L46L	SNP_silent	Membrane	M:L46L	G26660A
EPI_ISL_430711	26660	G	T	26660	29903	M	L46F	SNP	Membrane	M:L46F	G26660T
EPI_ISL_422344	26660	G	T	26622	29813	M	L46F	SNP	Membrane	M:L46F	G26660T
EPI_ISL_432043	26660	G	T	26622	29865	M	L46F	SNP	Membrane	M:L46F	G26660T
EPI_ISL_445418	26660	G	T	26624	29867	M	L46F	SNP	Membrane	M:L46F	G26660T
EPI_ISL_445431	26660	G	T	26650	29893	M	L46F	SNP	Membrane	M:L46F	G26660T
EPI_ISL_445807	26660	G	T	26622	29865	M	L46F	SNP	Membrane	M:L46F	G26660T
EPI_ISL_445911	26660	G	T	26644	29887	M	L46F	SNP	Membrane	M:L46F	G26660T
EPI_ISL_445938	26660	G	T	26660	29903	M	L46F	SNP	Membrane	M:L46F	G26660T
EPI_ISL_446307	26660	G	T	26658	29901	M	L46F	SNP	Membrane	M:L46F	G26660T
EPI_ISL_446480	26660	G	T	26650	29893	M	L46F	SNP	Membrane	M:L46F	G26660T
EPI_ISL_474352	26660	G	T	26656	29899	M	L46F	SNP	Membrane	M:L46F	G26660T
EPI_ISL_447329	26660	G	T	26661	29889	M	L46F	SNP	Membrane	M:L46F	G26660T
EPI_ISL_448957	26660	G	A	26623	29866	M	L46L	SNP_silent	Membrane	M:L46L	G26660A
EPI_ISL_447265	26660	G	T	26661	29892	M	L46F	SNP	Membrane	M:L46F	G26660T
EPI_ISL_447322	26660	G	T	26661	29892	M	L46F	SNP	Membrane	M:L46F	G26660T
EPI_ISL_447324	26660	G	T	26661	29892	M	L46F	SNP	Membrane	M:L46F	G26660T
EPI_ISL_447319	26660	G	T	26661	29889	M	L46F	SNP	Membrane	M:L46F	G26660T
EPI_ISL_447271	26660	G	T	26661	29892	M	L46F	SNP	Membrane	M:L46F	G26660T
EPI_ISL_464161	26663	T	C	26663	29903	M	Y47Y	SNP_silent	Membrane	M:Y47Y	T26663C
EPI_ISL_457836	26665	T	C	26611	29782	M	I48T	SNP	Membrane	M:I48T	T26665C
EPI_ISL_457827	26665	T	C	26611	29782	M	I48T	SNP	Membrane	M:I48T	T26665C
EPI_ISL_467262	26675	A	G	26675	29903	M	L51L	SNP_silent	Membrane	M:L51L	A26675G
EPI_ISL_433084	26677	T	C	26677	29903	M	I52T	SNP	Membrane	M:I52T	T26677C
EPI_ISL_433093	26677	T	C	26677	29903	M	I52T	SNP	Membrane	M:I52T	T26677C
EPI_ISL_433110	26677	T	C	26677	29903	M	I52T	SNP	Membrane	M:I52T	T26677C
EPI_ISL_433111	26677	T	C	26677	29903	M	I52T	SNP	Membrane	M:I52T	T26677C
EPI_ISL_433136	26677	T	C	26677	29903	M	I52T	SNP	Membrane	M:I52T	T26677C
EPI_ISL_433145	26677	T	C	26677	29903	M	I52T	SNP	Membrane	M:I52T	T26677C
EPI_ISL_433165	26677	T	C	26677	29903	M	I52T	SNP	Membrane	M:I52T	T26677C
EPI_ISL_433167	26677	T	C	26677	29903	M	I52T	SNP	Membrane	M:I52T	T26677C
EPI_ISL_439151	26677	T	C	26677	29903	M	I52T	SNP	Membrane	M:I52T	T26677C
EPI_ISL_439156	26677	T	C	26677	29903	M	I52T	SNP	Membrane	M:I52T	T26677C
EPI_ISL_439172	26677	T	C	26677	29903	M	I52T	SNP	Membrane	M:I52T	T26677C
EPI_ISL_439201	26677	T	C	26677	29903	M	I52T	SNP	Membrane	M:I52T	T26677C
EPI_ISL_439206	26677	T	C	26677	29903	M	I52T	SNP	Membrane	M:I52T	T26677C
EPI_ISL_439250	26677	T	C	26677	29903	M	I52T	SNP	Membrane	M:I52T	T26677C
EPI_ISL_439311	26677	T	C	26677	29903	M	I52T	SNP	Membrane	M:I52T	T26677C
EPI_ISL_439325	26677	T	C	26677	29903	M	I52T	SNP	Membrane	M:I52T	T26677C
EPI_ISL_439668	26677	T	C	26677	29903	M	I52T	SNP	Membrane	M:I52T	T26677C
EPI_ISL_442230	26677	T	C	26623	29812	M	I52T	SNP	Membrane	M:I52T	T26677C
EPI_ISL_449266	26677	T	C	26677	29903	M	I52T	SNP	Membrane	M:I52T	T26677C
EPI_ISL_453169	26677	T	C	26677	29903	M	I52T	SNP	Membrane	M:I52T	T26677C
EPI_ISL_461713	26677	T	C	26677	29903	M	I52T	SNP	Membrane	M:I52T	T26677C
EPI_ISL_413018	26677	T	C	26665	29858	M	I52T	SNP	Membrane	M:I52T	T26677C
EPI_ISL_413017	26677	T	C	26677	29903	M	I52T	SNP	Membrane	M:I52T	T26677C
EPI_ISL_445376	26679	T	C	26648	29820	M	F53L	SNP	Membrane	M:F53L	T26679C
EPI_ISL_452413	26679	T	C	26679	29903	M	F53L	SNP	Membrane	M:F53L	T26679C
EPI_ISL_419576	26681	C	T	26681	29863	M	F53F	SNP_silent	Membrane	M:F53F	C26681T
EPI_ISL_419998	26681	C	T	26678	29900	M	F53F	SNP_silent	Membrane	M:F53F	C26681T
EPI_ISL_421175	26681	C	T	26627	29782	M	F53F	SNP_silent	Membrane	M:F53F	C26681T
EPI_ISL_422202	26681	C	T	26650	29872	M	F53F	SNP_silent	Membrane	M:F53F	C26681T
EPI_ISL_422550	26681	C	T	26626	29724	M	F53F	SNP_silent	Membrane	M:F53F	C26681T
EPI_ISL_423588	26681	C	T	26681	29903	M	F53F	SNP_silent	Membrane	M:F53F	C26681T
EPI_ISL_425280	26681	C	T	26681	29903	M	F53F	SNP_silent	Membrane	M:F53F	C26681T
EPI_ISL_429734	26681	C	T	26681	29860	M	F53F	SNP_silent	Membrane	M:F53F	C26681T
EPI_ISL_429798	26681	C	T	26681	29879	M	F53F	SNP_silent	Membrane	M:F53F	C26681T
EPI_ISL_430926	26681	C	T	26650	29886	M	F53F	SNP_silent	Membrane	M:F53F	C26681T
EPI_ISL_432998	26681	C	T	26681	29903	M	F53F	SNP_silent	Membrane	M:F53F	C26681T
EPI_ISL_433494	26681	C	T	26681	29903	M	F53F	SNP_silent	Membrane	M:F53F	C26681T
EPI_ISL_433666	26681	C	T	26681	29903	M	F53F	SNP_silent	Membrane	M:F53F	C26681T
EPI_ISL_434977	26681	C	T	26681	29903	M	F53F	SNP_silent	Membrane	M:F53F	C26681T
EPI_ISL_435488	26681	C	T	26681	29903	M	F53F	SNP_silent	Membrane	M:F53F	C26681T
EPI_ISL_435510	26681	C	T	26681	29903	M	F53F	SNP_silent	Membrane	M:F53F	C26681T
EPI_ISL_438738	26681	C	T	26681	29903	M	F53F	SNP_silent	Membrane	M:F53F	C26681T
EPI_ISL_439408	26681	C	T	26627	29849	M	F53F	SNP_silent	Membrane	M:F53F	C26681T
EPI_ISL_440145	26681	C	T	26627	29795	M	F53F	SNP_silent	Membrane	M:F53F	C26681T
EPI_ISL_440637	26681	C	T	26627	29849	M	F53F	SNP_silent	Membrane	M:F53F	C26681T
EPI_ISL_440646	26681	C	T	26627	29782	M	F53F	SNP_silent	Membrane	M:F53F	C26681T
EPI_ISL_440664	26681	C	T	26627	29812	M	F53F	SNP_silent	Membrane	M:F53F	C26681T
EPI_ISL_440691	26681	C	T	26627	29782	M	F53F	SNP_silent	Membrane	M:F53F	C26681T
EPI_ISL_440696	26681	C	T	26627	29782	M	F53F	SNP_silent	Membrane	M:F53F	C26681T
EPI_ISL_440699	26681	C	T	26627	29782	M	F53F	SNP_silent	Membrane	M:F53F	C26681T
EPI_ISL_440716	26681	C	T	26627	29782	M	F53F	SNP_silent	Membrane	M:F53F	C26681T
EPI_ISL_440739	26681	C	T	26627	29784	M	F53F	SNP_silent	Membrane	M:F53F	C26681T
EPI_ISL_440756	26681	C	T	26627	29782	M	F53F	SNP_silent	Membrane	M:F53F	C26681T
EPI_ISL_440757	26681	C	T	26627	29782	M	F53F	SNP_silent	Membrane	M:F53F	C26681T
EPI_ISL_440785	26681	C	T	26627	29782	M	F53F	SNP_silent	Membrane	M:F53F	C26681T
EPI_ISL_440809	26681	C	T	26627	29849	M	F53F	SNP_silent	Membrane	M:F53F	C26681T
EPI_ISL_441021	26681	C	T	26681	29903	M	F53F	SNP_silent	Membrane	M:F53F	C26681T
EPI_ISL_441310	26681	C	T	26627	29849	M	F53F	SNP_silent	Membrane	M:F53F	C26681T
EPI_ISL_441935	26681	C	T	26681	29903	M	F53F	SNP_silent	Membrane	M:F53F	C26681T
EPI_ISL_442033	26681	C	T	26681	29903	M	F53F	SNP_silent	Membrane	M:F53F	C26681T
EPI_ISL_442632	26681	C	T	26627	29782	M	F53F	SNP_silent	Membrane	M:F53F	C26681T
EPI_ISL_442671	26681	C	T	26627	29812	M	F53F	SNP_silent	Membrane	M:F53F	C26681T
EPI_ISL_442692	26681	C	T	26627	29782	M	F53F	SNP_silent	Membrane	M:F53F	C26681T
EPI_ISL_442744	26681	C	T	26627	29782	M	F53F	SNP_silent	Membrane	M:F53F	C26681T
EPI_ISL_442805	26681	C	T	26627	29812	M	F53F	SNP_silent	Membrane	M:F53F	C26681T
EPI_ISL_442912	26681	C	T	26627	29782	M	F53F	SNP_silent	Membrane	M:F53F	C26681T
EPI_ISL_442929	26681	C	T	26618	29803	M	F53F	SNP_silent	Membrane	M:F53F	C26681T
EPI_ISL_442956	26681	C	T	26627	29849	M	F53F	SNP_silent	Membrane	M:F53F	C26681T
EPI_ISL_443700	26681	C	T	26627	29849	M	F53F	SNP_silent	Membrane	M:F53F	C26681T
EPI_ISL_443759	26681	C	T	26627	29782	M	F53F	SNP_silent	Membrane	M:F53F	C26681T
EPI_ISL_443965	26681	C	T	26627	29782	M	F53F	SNP_silent	Membrane	M:F53F	C26681T
EPI_ISL_447331	26681	C	T	26682	29892	M	F53F	SNP_silent	Membrane	M:F53F	C26681T
EPI_ISL_447332	26681	C	T	26682	29892	M	F53F	SNP_silent	Membrane	M:F53F	C26681T
EPI_ISL_448570	26681	C	T	26681	29901	M	F53F	SNP_silent	Membrane	M:F53F	C26681T
EPI_ISL_448655	26681	C	T	26681	29903	M	F53F	SNP_silent	Membrane	M:F53F	C26681T
EPI_ISL_448714	26681	C	T	26681	29903	M	F53F	SNP_silent	Membrane	M:F53F	C26681T
EPI_ISL_448725	26681	C	T	26681	29903	M	F53F	SNP_silent	Membrane	M:F53F	C26681T
EPI_ISL_448750	26681	C	T	26681	29900	M	F53F	SNP_silent	Membrane	M:F53F	C26681T
EPI_ISL_448836	26681	C	T	26681	29903	M	F53F	SNP_silent	Membrane	M:F53F	C26681T
EPI_ISL_453693	26681	C	T	26681	29903	M	F53F	SNP_silent	Membrane	M:F53F	C26681T
EPI_ISL_453724	26681	C	T	26681	29903	M	F53F	SNP_silent	Membrane	M:F53F	C26681T
EPI_ISL_456838	26681	C	T	26627	29728	M	F53F	SNP_silent	Membrane	M:F53F	C26681T
EPI_ISL_458111	26681	C	T	26681	29903	M	F53F	SNP_silent	Membrane	M:F53F	C26681T
EPI_ISL_458318	26681	C	T	26627	29782	M	F53F	SNP_silent	Membrane	M:F53F	C26681T
EPI_ISL_458324	26681	C	T	26627	29782	M	F53F	SNP_silent	Membrane	M:F53F	C26681T
EPI_ISL_458329	26681	C	T	26627	29782	M	F53F	SNP_silent	Membrane	M:F53F	C26681T
EPI_ISL_458351	26681	C	T	26627	29782	M	F53F	SNP_silent	Membrane	M:F53F	C26681T
EPI_ISL_458407	26681	C	T	26627	29782	M	F53F	SNP_silent	Membrane	M:F53F	C26681T
EPI_ISL_458423	26681	C	T	26627	29783	M	F53F	SNP_silent	Membrane	M:F53F	C26681T
EPI_ISL_458434	26681	C	T	26627	29782	M	F53F	SNP_silent	Membrane	M:F53F	C26681T
EPI_ISL_458441	26681	C	T	26627	29782	M	F53F	SNP_silent	Membrane	M:F53F	C26681T
EPI_ISL_458452	26681	C	T	26627	29782	M	F53F	SNP_silent	Membrane	M:F53F	C26681T
EPI_ISL_458729	26681	C	T	26627	29782	M	F53F	SNP_silent	Membrane	M:F53F	C26681T
EPI_ISL_458754	26681	C	T	26627	29784	M	F53F	SNP_silent	Membrane	M:F53F	C26681T
EPI_ISL_458778	26681	C	T	26627	29782	M	F53F	SNP_silent	Membrane	M:F53F	C26681T
EPI_ISL_458835	26681	C	T	26627	29782	M	F53F	SNP_silent	Membrane	M:F53F	C26681T
EPI_ISL_458844	26681	C	T	26627	29783	M	F53F	SNP_silent	Membrane	M:F53F	C26681T
EPI_ISL_458866	26681	C	T	26627	29782	M	F53F	SNP_silent	Membrane	M:F53F	C26681T
EPI_ISL_458876	26681	C	T	26627	29782	M	F53F	SNP_silent	Membrane	M:F53F	C26681T
EPI_ISL_458921	26681	C	T	26627	29782	M	F53F	SNP_silent	Membrane	M:F53F	C26681T
EPI_ISL_458930	26681	C	T	26627	29782	M	F53F	SNP_silent	Membrane	M:F53F	C26681T
EPI_ISL_458947	26681	C	T	26627	29782	M	F53F	SNP_silent	Membrane	M:F53F	C26681T
EPI_ISL_458951	26681	C	T	26627	29782	M	F53F	SNP_silent	Membrane	M:F53F	C26681T
EPI_ISL_458963	26681	C	T	26627	29782	M	F53F	SNP_silent	Membrane	M:F53F	C26681T
EPI_ISL_458965	26681	C	T	26627	29782	M	F53F	SNP_silent	Membrane	M:F53F	C26681T
EPI_ISL_458971	26681	C	T	26627	29782	M	F53F	SNP_silent	Membrane	M:F53F	C26681T
EPI_ISL_458979	26681	C	T	26627	29782	M	F53F	SNP_silent	Membrane	M:F53F	C26681T
EPI_ISL_459000	26681	C	T	26627	29782	M	F53F	SNP_silent	Membrane	M:F53F	C26681T
EPI_ISL_459002	26681	C	T	26627	29782	M	F53F	SNP_silent	Membrane	M:F53F	C26681T
EPI_ISL_459016	26681	C	T	26627	29782	M	F53F	SNP_silent	Membrane	M:F53F	C26681T
EPI_ISL_459030	26681	C	T	26627	29782	M	F53F	SNP_silent	Membrane	M:F53F	C26681T
EPI_ISL_459048	26681	C	T	26627	29782	M	F53F	SNP_silent	Membrane	M:F53F	C26681T
EPI_ISL_459057	26681	C	T	26627	29782	M	F53F	SNP_silent	Membrane	M:F53F	C26681T
EPI_ISL_460117	26681	C	T	26667	29856	M	F53F	SNP_silent	Membrane	M:F53F	C26681T
EPI_ISL_461120	26681	C	T	26627	29775	M	F53F	SNP_silent	Membrane	M:F53F	C26681T
EPI_ISL_461122	26681	C	T	26627	29775	M	F53F	SNP_silent	Membrane	M:F53F	C26681T
EPI_ISL_461241	26681	C	T	26627	29775	M	F53F	SNP_silent	Membrane	M:F53F	C26681T
EPI_ISL_461243	26681	C	T	26627	29775	M	F53F	SNP_silent	Membrane	M:F53F	C26681T
EPI_ISL_461996	26681	C	T	26681	29903	M	F53F	SNP_silent	Membrane	M:F53F	C26681T
EPI_ISL_461997	26681	C	T	26681	29903	M	F53F	SNP_silent	Membrane	M:F53F	C26681T
EPI_ISL_462032	26681	C	T	26681	29903	M	F53F	SNP_silent	Membrane	M:F53F	C26681T
EPI_ISL_462047	26681	C	T	26681	29903	M	F53F	SNP_silent	Membrane	M:F53F	C26681T
EPI_ISL_465351	26681	C	T	26681	29903	M	F53F	SNP_silent	Membrane	M:F53F	C26681T
EPI_ISL_465406	26681	C	T	26681	29903	M	F53F	SNP_silent	Membrane	M:F53F	C26681T
EPI_ISL_465441	26681	C	T	26681	29903	M	F53F	SNP_silent	Membrane	M:F53F	C26681T
EPI_ISL_465540	26681	C	T	26681	29903	M	F53F	SNP_silent	Membrane	M:F53F	C26681T
EPI_ISL_465628	26681	C	T	26681	29903	M	F53F	SNP_silent	Membrane	M:F53F	C26681T
EPI_ISL_465649	26681	C	T	26681	29903	M	F53F	SNP_silent	Membrane	M:F53F	C26681T
EPI_ISL_465715	26681	C	T	26681	29903	M	F53F	SNP_silent	Membrane	M:F53F	C26681T
EPI_ISL_465716	26681	C	T	26681	29903	M	F53F	SNP_silent	Membrane	M:F53F	C26681T
EPI_ISL_467784	26681	C	T	26671	29893	M	F53F	SNP_silent	Membrane	M:F53F	C26681T
EPI_ISL_469351	26681	C	T	26627	29782	M	F53F	SNP_silent	Membrane	M:F53F	C26681T
EPI_ISL_469383	26681	C	T	26627	29782	M	F53F	SNP_silent	Membrane	M:F53F	C26681T
EPI_ISL_469396	26681	C	T	26627	29782	M	F53F	SNP_silent	Membrane	M:F53F	C26681T
EPI_ISL_469428	26681	C	T	26627	29782	M	F53F	SNP_silent	Membrane	M:F53F	C26681T
EPI_ISL_469553	26681	C	T	26627	29783	M	F53F	SNP_silent	Membrane	M:F53F	C26681T
EPI_ISL_469602	26681	C	T	26627	29782	M	F53F	SNP_silent	Membrane	M:F53F	C26681T
EPI_ISL_469646	26681	C	T	26627	29782	M	F53F	SNP_silent	Membrane	M:F53F	C26681T
EPI_ISL_469650	26681	C	T	26627	29782	M	F53F	SNP_silent	Membrane	M:F53F	C26681T
EPI_ISL_469688	26681	C	T	26627	29782	M	F53F	SNP_silent	Membrane	M:F53F	C26681T
EPI_ISL_469708	26681	C	T	26627	29782	M	F53F	SNP_silent	Membrane	M:F53F	C26681T
EPI_ISL_470530	26681	C	T	26627	29782	M	F53F	SNP_silent	Membrane	M:F53F	C26681T
EPI_ISL_472326	26681	C	T	26676	29898	M	F53F	SNP_silent	Membrane	M:F53F	C26681T
EPI_ISL_467846	26681	C	T	26627	29782	M	F53F	SNP_silent	Membrane	M:F53F	C26681T
EPI_ISL_422581	26681	C	T	26624	29772	M	F53F	SNP_silent	Membrane	M:F53F	C26681T
EPI_ISL_447734	26681	C	T	26626	29724	M	F53F	SNP_silent	Membrane	M:F53F	C26681T
EPI_ISL_460422	26681	C	T	26675	29866	M	F53F	SNP_silent	Membrane	M:F53F	C26681T
EPI_ISL_471445	26681	C	T	26585	29791	M	F53F	SNP_silent	Membrane	M:F53F	C26681T
EPI_ISL_466541	26681	C	T	26681	29903	M	F53F	SNP_silent	Membrane	M:F53F	C26681T
EPI_ISL_465866	26681	C	T	26681	29903	M	F53F	SNP_silent	Membrane	M:F53F	C26681T
EPI_ISL_455671	26681	C	T	26681	29903	M	F53F	SNP_silent	Membrane	M:F53F	C26681T
EPI_ISL_452414	26681	C	T	26681	29903	M	F53F	SNP_silent	Membrane	M:F53F	C26681T
EPI_ISL_440711	26681	C	T	26627	29782	M	F53F	SNP_silent	Membrane	M:F53F	C26681T
EPI_ISL_433500	26681	C	T	26678	29900	M	F53F	SNP_silent	Membrane	M:F53F	C26681T
EPI_ISL_443932	26681	C	T	26624	29846	M	F53F	SNP_silent	Membrane	M:F53F	C26681T
EPI_ISL_440143	26681	C	T	26627	29782	M	F53F	SNP_silent	Membrane	M:F53F	C26681T
EPI_ISL_463033	26681	C	T	26681	29683	M	F53F	SNP_silent	Membrane	M:F53F	C26681T
EPI_ISL_463034	26681	C	T	26681	29688	M	F53F	SNP_silent	Membrane	M:F53F	C26681T
EPI_ISL_463063	26681	C	T	26681	29685	M	F53F	SNP_silent	Membrane	M:F53F	C26681T
EPI_ISL_455091	26681	C	T	26415	29408	M	F53F	SNP_silent	Membrane	M:F53F	C26681T
EPI_ISL_469653	26681	C	T	26627	29782	M	F53F	SNP_silent	Membrane	M:F53F	C26681T
EPI_ISL_474924	26681	C	T	26681	29903	M	F53F	SNP_silent	Membrane	M:F53F	C26681T
EPI_ISL_427766	26681	C	T	26417	29412	M	F53F	SNP_silent	Membrane	M:F53F	C26681T
EPI_ISL_452371	26681	C	T	26681	29903	M	F53F	SNP_silent	Membrane	M:F53F	C26681T
EPI_ISL_452676	26681	C	T	26681	29903	M	F53F	SNP_silent	Membrane	M:F53F	C26681T
EPI_ISL_428834	26681	C	T	26671	29881	M	F53F	SNP_silent	Membrane	M:F53F	C26681T
EPI_ISL_462477	26681	C	T	26682	29904	M	F53F	SNP_silent	Membrane	M:F53F	C26681T
EPI_ISL_417961	26681	C	T	26641	29818	M	F53F	SNP_silent	Membrane	M:F53F	C26681T
EPI_ISL_429738	26681	C	T	26681	29857	M	F53F	SNP_silent	Membrane	M:F53F	C26681T
EPI_ISL_429743	26681	C	T	26681	29861	M	F53F	SNP_silent	Membrane	M:F53F	C26681T
EPI_ISL_429774	26681	C	T	26681	29861	M	F53F	SNP_silent	Membrane	M:F53F	C26681T
EPI_ISL_440683	26681	C	T	26627	29782	M	F53F	SNP_silent	Membrane	M:F53F	C26681T
EPI_ISL_442644	26681	C	T	26627	29806	M	F53F	SNP_silent	Membrane	M:F53F	C26681T
EPI_ISL_442670	26681	C	T	26627	29849	M	F53F	SNP_silent	Membrane	M:F53F	C26681T
EPI_ISL_442782	26681	C	T	26627	29812	M	F53F	SNP_silent	Membrane	M:F53F	C26681T
EPI_ISL_450741	26681	C	T	26630	29320	M	F53F	SNP_silent	Membrane	M:F53F	C26681T
EPI_ISL_451727	26681	C	T	26681	29903	M	F53F	SNP_silent	Membrane	M:F53F	C26681T
EPI_ISL_452372	26681	C	T	26681	29903	M	F53F	SNP_silent	Membrane	M:F53F	C26681T
EPI_ISL_452398	26681	C	T	26681	29903	M	F53F	SNP_silent	Membrane	M:F53F	C26681T
EPI_ISL_452402	26681	C	T	26681	29903	M	F53F	SNP_silent	Membrane	M:F53F	C26681T
EPI_ISL_452415	26681	C	T	26681	29903	M	F53F	SNP_silent	Membrane	M:F53F	C26681T
EPI_ISL_452416	26681	C	T	26681	29903	M	F53F	SNP_silent	Membrane	M:F53F	C26681T
EPI_ISL_452436	26681	C	T	26681	29903	M	F53F	SNP_silent	Membrane	M:F53F	C26681T
EPI_ISL_452608	26681	C	T	26681	29903	M	F53F	SNP_silent	Membrane	M:F53F	C26681T
EPI_ISL_455320	26681	C	T	26681	29903	M	F53F	SNP_silent	Membrane	M:F53F	C26681T
EPI_ISL_466415	26681	C	T	26681	29903	M	F53F	SNP_silent	Membrane	M:F53F	C26681T
EPI_ISL_468337	26681	C	T	26681	29903	M	F53F	SNP_silent	Membrane	M:F53F	C26681T
EPI_ISL_468837	26681	C	T	26681	29903	M	F53F	SNP_silent	Membrane	M:F53F	C26681T
EPI_ISL_468985	26681	C	T	26681	29903	M	F53F	SNP_silent	Membrane	M:F53F	C26681T
EPI_ISL_471452	26681	C	T	26679	29901	M	F53F	SNP_silent	Membrane	M:F53F	C26681T
EPI_ISL_444103	26681	C	T	26681	29903	M	F53F	SNP_silent	Membrane	M:F53F	C26681T
EPI_ISL_444112	26681	C	T	26681	29903	M	F53F	SNP_silent	Membrane	M:F53F	C26681T
EPI_ISL_451299	26681	C	T	26656	29834	M	F53F	SNP_silent	Membrane	M:F53F	C26681T
EPI_ISL_417026	26684	C	T	26647	29866	M	L54L	SNP_silent	Membrane	M:L54L	C26684T
EPI_ISL_444061	26684	C	T	26668	29858	M	L54L	SNP_silent	Membrane	M:L54L	C26684T
EPI_ISL_444067	26684	C	T	26678	29868	M	L54L	SNP_silent	Membrane	M:L54L	C26684T
EPI_ISL_444077	26684	C	T	26672	29862	M	L54L	SNP_silent	Membrane	M:L54L	C26684T
EPI_ISL_454614	26684	C	T	26654	29873	M	L54L	SNP_silent	Membrane	M:L54L	C26684T
EPI_ISL_452500	26690	G	T	26690	29903	M	L56L	SNP_silent	Membrane	M:L56L	G26690T
EPI_ISL_420433	26690	G	T	26636	29782	M	L56L	SNP_silent	Membrane	M:L56L	G26690T
EPI_ISL_436043	26690	G	T	26690	29882	M	L56L	SNP_silent	Membrane	M:L56L	G26690T
EPI_ISL_452615	26690	G	T	26690	29903	M	L56L	SNP_silent	Membrane	M:L56L	G26690T
EPI_ISL_454364	26690	G	T	26690	29840	M	L56L	SNP_silent	Membrane	M:L56L	G26690T
EPI_ISL_454399	26690	G	T	26690	29840	M	L56L	SNP_silent	Membrane	M:L56L	G26690T
EPI_ISL_454527	26690	G	T	26690	29903	M	L56L	SNP_silent	Membrane	M:L56L	G26690T
EPI_ISL_457816	26690	G	T	26690	29903	M	L56L	SNP_silent	Membrane	M:L56L	G26690T
EPI_ISL_466487	26690	G	T	26690	29903	M	L56L	SNP_silent	Membrane	M:L56L	G26690T
EPI_ISL_466672	26690	G	T	26690	29903	M	L56L	SNP_silent	Membrane	M:L56L	G26690T
EPI_ISL_453643	26690	G	T	26639	29852	M	L56L	SNP_silent	Membrane	M:L56L	G26690T
EPI_ISL_441860	26690	G	T	26687	29900	M	L56L	SNP_silent	Membrane	M:L56L	G26690T
EPI_ISL_432701	26690	G	T	26687	29900	M	L56L	SNP_silent	Membrane	M:L56L	G26690T
EPI_ISL_433067	26690	G	T	26687	29900	M	L56L	SNP_silent	Membrane	M:L56L	G26690T
EPI_ISL_441858	26690	G	T	26687	29900	M	L56L	SNP_silent	Membrane	M:L56L	G26690T
EPI_ISL_448413	26690	G	T	26687	29900	M	L56L	SNP_silent	Membrane	M:L56L	G26690T
EPI_ISL_448419	26690	G	T	26687	29900	M	L56L	SNP_silent	Membrane	M:L56L	G26690T
EPI_ISL_448423	26690	G	T	26687	29900	M	L56L	SNP_silent	Membrane	M:L56L	G26690T
EPI_ISL_448425	26690	G	T	26687	29900	M	L56L	SNP_silent	Membrane	M:L56L	G26690T
EPI_ISL_448426	26690	G	T	26687	29900	M	L56L	SNP_silent	Membrane	M:L56L	G26690T
EPI_ISL_453134	26690	G	T	26690	29903	M	L56L	SNP_silent	Membrane	M:L56L	G26690T
EPI_ISL_453139	26690	G	T	26690	29903	M	L56L	SNP_silent	Membrane	M:L56L	G26690T
EPI_ISL_453140	26690	G	T	26690	29903	M	L56L	SNP_silent	Membrane	M:L56L	G26690T
EPI_ISL_456963	26690	G	T	26690	29903	M	L56L	SNP_silent	Membrane	M:L56L	G26690T
EPI_ISL_461749	26690	G	T	26690	29903	M	L56L	SNP_silent	Membrane	M:L56L	G26690T
EPI_ISL_427320	26693	A	G	26693	29903	M	L57L	SNP_silent	Membrane	M:L57L	A26693G
EPI_ISL_441250	26700	G	T	26646	29812	M	V60L	SNP	Membrane	M:V60L	G26700T
EPI_ISL_436332	26700	G	T	26650	29636	M	V60L	SNP	Membrane	M:V60L	G26700T
EPI_ISL_440088	26702	A	G	26645	29779	M	V60V	SNP_silent	Membrane	M:V60V	A26702G
EPI_ISL_472511	26702	A	G	26664	29865	M	V60V	SNP_silent	Membrane	M:V60V	A26702G
EPI_ISL_464932	26706	T	C	26706	29903	M	T61T	SNP_silent	Membrane	M:T61T	T26706C
EPI_ISL_447810	26708	A	G	26648	29719	M	L62L	SNP_silent	Membrane	M:L62L	A26708G
EPI_ISL_425915	26709	G	A	26709	29903	M	A63T	SNP	Membrane	M:A63T	G26709A
EPI_ISL_448684	26709	G	T	26709	29903	M	A63S	SNP	Membrane	M:A63S	G26709T
EPI_ISL_452677	26709	G	A	26709	29903	M	A63T	SNP	Membrane	M:A63T	G26709A
EPI_ISL_452678	26709	G	A	26709	29903	M	A63T	SNP	Membrane	M:A63T	G26709A
EPI_ISL_465491	26712	T	A	26712	29903	M	C64S	SNP	Membrane	M:C64S	T26712A
EPI_ISL_465711	26712	T	A	26712	29903	M	C64S	SNP	Membrane	M:C64S	T26712A
EPI_ISL_465712	26712	T	A	26712	29903	M	C64S	SNP	Membrane	M:C64S	T26712A
EPI_ISL_450519	26713	G	T	26713	29903	M	C64F	SNP	Membrane	M:C64F	G26713T
EPI_ISL_429236	26713	G	T	26713	29900	M	C64F	SNP	Membrane	M:C64F	G26713T
EPI_ISL_474478	26713	G	T	26713	29903	M	C64F	SNP	Membrane	M:C64F	G26713T
EPI_ISL_420822	26713	G	T	26713	29903	M	C64F	SNP	Membrane	M:C64F	G26713T
EPI_ISL_436842	26713	G	T	26713	29903	M	C64F	SNP	Membrane	M:C64F	G26713T
EPI_ISL_449806	26713	G	T	26711	29901	M	C64F	SNP	Membrane	M:C64F	G26713T
EPI_ISL_450523	26713	G	T	26713	29903	M	C64F	SNP	Membrane	M:C64F	G26713T
EPI_ISL_463437	26713	G	T	26713	29903	M	C64F	SNP	Membrane	M:C64F	G26713T
EPI_ISL_431292	26716	.	T	26699	29827	M	F65	insertion_frameshift	Membrane	M:F65	.26716T
EPI_ISL_428715	26718	G	T	26453	29638	M	V66L	SNP	Membrane	M:V66L	G26718T
EPI_ISL_428721	26718	G	T	26453	29638	M	V66L	SNP	Membrane	M:V66L	G26718T
EPI_ISL_428230	26720	G	C	26720	29908	M	V66V	SNP_silent	Membrane	M:V66V	G26720C
EPI_ISL_417523	26720	G	C	26718	29899	M	V66V	SNP_silent	Membrane	M:V66V	G26720C
EPI_ISL_417524	26720	G	C	26719	29902	M	V66V	SNP_silent	Membrane	M:V66V	G26720C
EPI_ISL_418832	26720	G	C	26720	29903	M	V66V	SNP_silent	Membrane	M:V66V	G26720C
EPI_ISL_422413	26720	G	C	26720	29870	M	V66V	SNP_silent	Membrane	M:V66V	G26720C
EPI_ISL_423067	26720	G	C	26720	29903	M	V66V	SNP_silent	Membrane	M:V66V	G26720C
EPI_ISL_426630	26720	G	C	26720	29980	M	V66V	SNP_silent	Membrane	M:V66V	G26720C
EPI_ISL_427029	26720	G	C	26720	29903	M	V66V	SNP_silent	Membrane	M:V66V	G26720C
EPI_ISL_429792	26720	G	C	26720	29883	M	V66V	SNP_silent	Membrane	M:V66V	G26720C
EPI_ISL_430480	26720	G	C	26720	29903	M	V66V	SNP_silent	Membrane	M:V66V	G26720C
EPI_ISL_430704	26720	G	C	26720	29903	M	V66V	SNP_silent	Membrane	M:V66V	G26720C
EPI_ISL_436123	26720	G	C	26720	29903	M	V66V	SNP_silent	Membrane	M:V66V	G26720C
EPI_ISL_436826	26720	G	C	26720	29903	M	V66V	SNP_silent	Membrane	M:V66V	G26720C
EPI_ISL_437121	26720	G	C	26720	29903	M	V66V	SNP_silent	Membrane	M:V66V	G26720C
EPI_ISL_437319	26720	G	C	26714	29891	M	V66V	SNP_silent	Membrane	M:V66V	G26720C
EPI_ISL_437320	26720	G	C	26714	29897	M	V66V	SNP_silent	Membrane	M:V66V	G26720C
EPI_ISL_437321	26720	G	C	26714	29890	M	V66V	SNP_silent	Membrane	M:V66V	G26720C
EPI_ISL_437329	26720	G	C	26714	29883	M	V66V	SNP_silent	Membrane	M:V66V	G26720C
EPI_ISL_437334	26720	G	C	26714	29887	M	V66V	SNP_silent	Membrane	M:V66V	G26720C
EPI_ISL_462280	26720	G	C	26720	29889	M	V66V	SNP_silent	Membrane	M:V66V	G26720C
EPI_ISL_463002	26720	G	C	26679	29541	M	V66V	SNP_silent	Membrane	M:V66V	G26720C
EPI_ISL_437325	26720	G	C	26714	29888	M	V66V	SNP_silent	Membrane	M:V66V	G26720C
EPI_ISL_437327	26720	G	C	26714	29892	M	V66V	SNP_silent	Membrane	M:V66V	G26720C
EPI_ISL_462436	26720	G	T	26666	29782	M	V66V	SNP_silent	Membrane	M:V66V	G26720T
EPI_ISL_429575	26721	C	T	26721	29903	M	L67F	SNP	Membrane	M:L67F	C26721T
EPI_ISL_426011	26723	T	A	26723	29903	M	L67L	SNP_silent	Membrane	M:L67L	T26723A
EPI_ISL_455478	26724	G	T	26724	29880	M	A68S	SNP	Membrane	M:A68S	G26724T
EPI_ISL_446492	26724	G	A	26723	29902	M	A68T	SNP	Membrane	M:A68T	G26724A
EPI_ISL_436196	26724	G	T	26686	29813	M	A68S	SNP	Membrane	M:A68S	G26724T
EPI_ISL_451798	26726	T	C	26726	29903	M	A68A	SNP_silent	Membrane	M:A68A	T26726C
EPI_ISL_453778	26727	G	T	26727	29903	M	A69S	SNP	Membrane	M:A69S	G26727T
EPI_ISL_421550	26727	G	T	26727	29903	M	A69S	SNP	Membrane	M:A69S	G26727T
EPI_ISL_425380	26727	G	T	26727	29903	M	A69S	SNP	Membrane	M:A69S	G26727T
EPI_ISL_429532	26727	G	T	26727	29903	M	A69S	SNP	Membrane	M:A69S	G26727T
EPI_ISL_430794	26727	G	T	26678	29600	M	A69S	SNP	Membrane	M:A69S	G26727T
EPI_ISL_433954	26727	G	T	26727	29903	M	A69S	SNP	Membrane	M:A69S	G26727T
EPI_ISL_438715	26727	G	T	26727	29903	M	A69S	SNP	Membrane	M:A69S	G26727T
EPI_ISL_445760	26727	G	T	26726	29902	M	A69S	SNP	Membrane	M:A69S	G26727T
EPI_ISL_462947	26727	G	T	26698	29837	M	A69S	SNP	Membrane	M:A69S	G26727T
EPI_ISL_462967	26727	G	T	26700	29876	M	A69S	SNP	Membrane	M:A69S	G26727T
EPI_ISL_462973	26727	G	T	26725	29818	M	A69S	SNP	Membrane	M:A69S	G26727T
EPI_ISL_451510	26727	G	T	26461	29408	M	A69S	SNP	Membrane	M:A69S	G26727T
EPI_ISL_437438	26727	G	T	26727	29903	M	A69S	SNP	Membrane	M:A69S	G26727T
EPI_ISL_447679	26728	C	T	26728	29903	M	A69V	SNP	Membrane	M:A69V	C26728T
EPI_ISL_467985	26729	T	C	26727	29901	M	A69A	SNP_silent	Membrane	M:A69A	T26729C
EPI_ISL_408668	26729	T	C	26728	29889	M	A69A	SNP_silent	Membrane	M:A69A	T26729C
EPI_ISL_416427	26729	T	C	26728	29889	M	A69A	SNP_silent	Membrane	M:A69A	T26729C
EPI_ISL_427190	26729	T	C	26719	29862	M	A69A	SNP_silent	Membrane	M:A69A	T26729C
EPI_ISL_444573	26729	T	C	26729	29903	M	A69A	SNP_silent	Membrane	M:A69A	T26729C
EPI_ISL_416328	26729	T	C	26675	29812	M	A69A	SNP_silent	Membrane	M:A69A	T26729C
EPI_ISL_460008	26729	T	C	26729	29903	M	A69A	SNP_silent	Membrane	M:A69A	T26729C
EPI_ISL_455998	26729	T	C	26729	29840	M	A69A	SNP_silent	Membrane	M:A69A	T26729C
EPI_ISL_444588	26729	T	C	26729	29903	M	A69A	SNP_silent	Membrane	M:A69A	T26729C
EPI_ISL_454425	26729	T	C	26725	29858	M	A69A	SNP_silent	Membrane	M:A69A	T26729C
EPI_ISL_434827	26729	T	C	26729	29903	M	A69A	SNP_silent	Membrane	M:A69A	T26729C
EPI_ISL_434829	26729	T	C	26729	29903	M	A69A	SNP_silent	Membrane	M:A69A	T26729C
EPI_ISL_434849	26729	T	C	26729	29903	M	A69A	SNP_silent	Membrane	M:A69A	T26729C
EPI_ISL_434964	26729	T	C	26729	29903	M	A69A	SNP_silent	Membrane	M:A69A	T26729C
EPI_ISL_435010	26729	T	C	26729	29903	M	A69A	SNP_silent	Membrane	M:A69A	T26729C
EPI_ISL_435011	26729	T	C	26729	29903	M	A69A	SNP_silent	Membrane	M:A69A	T26729C
EPI_ISL_434838	26729	T	C	26729	29903	M	A69A	SNP_silent	Membrane	M:A69A	T26729C
EPI_ISL_448117	26729	T	C	26675	29782	M	A69A	SNP_silent	Membrane	M:A69A	T26729C
EPI_ISL_410045	26729	T	C	26729	29882	M	A69A	SNP_silent	Membrane	M:A69A	T26729C
EPI_ISL_416538	26729	T	C	26729	29903	M	A69A	SNP_silent	Membrane	M:A69A	T26729C
EPI_ISL_418045	26729	T	C	26655	29790	M	A69A	SNP_silent	Membrane	M:A69A	T26729C
EPI_ISL_418869	26729	T	C	26629	29794	M	A69A	SNP_silent	Membrane	M:A69A	T26729C
EPI_ISL_418897	26729	T	C	26697	29871	M	A69A	SNP_silent	Membrane	M:A69A	T26729C
EPI_ISL_419714	26729	T	C	26691	29865	M	A69A	SNP_silent	Membrane	M:A69A	T26729C
EPI_ISL_419727	26729	T	C	26691	29865	M	A69A	SNP_silent	Membrane	M:A69A	T26729C
EPI_ISL_419736	26729	T	C	26691	29865	M	A69A	SNP_silent	Membrane	M:A69A	T26729C
EPI_ISL_419746	26729	T	C	26725	29899	M	A69A	SNP_silent	Membrane	M:A69A	T26729C
EPI_ISL_419747	26729	T	C	26717	29891	M	A69A	SNP_silent	Membrane	M:A69A	T26729C
EPI_ISL_419751	26729	T	C	26699	29873	M	A69A	SNP_silent	Membrane	M:A69A	T26729C
EPI_ISL_419752	26729	T	C	26691	29865	M	A69A	SNP_silent	Membrane	M:A69A	T26729C
EPI_ISL_419755	26729	T	C	26691	29865	M	A69A	SNP_silent	Membrane	M:A69A	T26729C
EPI_ISL_419769	26729	T	C	26691	29865	M	A69A	SNP_silent	Membrane	M:A69A	T26729C
EPI_ISL_419777	26729	T	C	26691	29865	M	A69A	SNP_silent	Membrane	M:A69A	T26729C
EPI_ISL_419785	26729	T	C	26717	29891	M	A69A	SNP_silent	Membrane	M:A69A	T26729C
EPI_ISL_419788	26729	T	C	26699	29873	M	A69A	SNP_silent	Membrane	M:A69A	T26729C
EPI_ISL_419789	26729	T	C	26699	29873	M	A69A	SNP_silent	Membrane	M:A69A	T26729C
EPI_ISL_419795	26729	T	C	26707	29881	M	A69A	SNP_silent	Membrane	M:A69A	T26729C
EPI_ISL_419796	26729	T	C	26727	29901	M	A69A	SNP_silent	Membrane	M:A69A	T26729C
EPI_ISL_419812	26729	T	C	26691	29865	M	A69A	SNP_silent	Membrane	M:A69A	T26729C
EPI_ISL_419814	26729	T	C	26693	29867	M	A69A	SNP_silent	Membrane	M:A69A	T26729C
EPI_ISL_419821	26729	T	C	26719	29893	M	A69A	SNP_silent	Membrane	M:A69A	T26729C
EPI_ISL_419826	26729	T	C	26704	29827	M	A69A	SNP_silent	Membrane	M:A69A	T26729C
EPI_ISL_419847	26729	T	C	26691	29865	M	A69A	SNP_silent	Membrane	M:A69A	T26729C
EPI_ISL_419904	26729	T	C	26691	29865	M	A69A	SNP_silent	Membrane	M:A69A	T26729C
EPI_ISL_419910	26729	T	C	26701	29875	M	A69A	SNP_silent	Membrane	M:A69A	T26729C
EPI_ISL_420786	26729	T	C	26729	29882	M	A69A	SNP_silent	Membrane	M:A69A	T26729C
EPI_ISL_420788	26729	T	C	26729	29882	M	A69A	SNP_silent	Membrane	M:A69A	T26729C
EPI_ISL_420808	26729	T	C	26699	29873	M	A69A	SNP_silent	Membrane	M:A69A	T26729C
EPI_ISL_421286	26729	T	C	26675	29782	M	A69A	SNP_silent	Membrane	M:A69A	T26729C
EPI_ISL_421291	26729	T	C	26675	29782	M	A69A	SNP_silent	Membrane	M:A69A	T26729C
EPI_ISL_421426	26729	T	C	26674	29724	M	A69A	SNP_silent	Membrane	M:A69A	T26729C
EPI_ISL_422415	26729	T	C	26729	29870	M	A69A	SNP_silent	Membrane	M:A69A	T26729C
EPI_ISL_424841	26729	T	C	26729	29882	M	A69A	SNP_silent	Membrane	M:A69A	T26729C
EPI_ISL_424842	26729	T	C	26729	29882	M	A69A	SNP_silent	Membrane	M:A69A	T26729C
EPI_ISL_424854	26729	T	C	26729	29882	M	A69A	SNP_silent	Membrane	M:A69A	T26729C
EPI_ISL_424859	26729	T	C	26729	29882	M	A69A	SNP_silent	Membrane	M:A69A	T26729C
EPI_ISL_424860	26729	T	C	26729	29882	M	A69A	SNP_silent	Membrane	M:A69A	T26729C
EPI_ISL_424861	26729	T	C	26729	29882	M	A69A	SNP_silent	Membrane	M:A69A	T26729C
EPI_ISL_424862	26729	T	C	26729	29882	M	A69A	SNP_silent	Membrane	M:A69A	T26729C
EPI_ISL_424864	26729	T	C	26729	29882	M	A69A	SNP_silent	Membrane	M:A69A	T26729C
EPI_ISL_424888	26729	T	C	26729	29882	M	A69A	SNP_silent	Membrane	M:A69A	T26729C
EPI_ISL_424902	26729	T	C	26729	29882	M	A69A	SNP_silent	Membrane	M:A69A	T26729C
EPI_ISL_424903	26729	T	C	26729	29882	M	A69A	SNP_silent	Membrane	M:A69A	T26729C
EPI_ISL_424904	26729	T	C	26729	29882	M	A69A	SNP_silent	Membrane	M:A69A	T26729C
EPI_ISL_424987	26729	T	C	26704	29834	M	A69A	SNP_silent	Membrane	M:A69A	T26729C
EPI_ISL_425658	26729	T	C	26675	29782	M	A69A	SNP_silent	Membrane	M:A69A	T26729C
EPI_ISL_425735	26729	T	C	26675	29782	M	A69A	SNP_silent	Membrane	M:A69A	T26729C
EPI_ISL_425793	26729	T	C	26729	29903	M	A69A	SNP_silent	Membrane	M:A69A	T26729C
EPI_ISL_426119	26729	T	C	26698	29871	M	A69A	SNP_silent	Membrane	M:A69A	T26729C
EPI_ISL_426182	26729	T	C	26653	29811	M	A69A	SNP_silent	Membrane	M:A69A	T26729C
EPI_ISL_426183	26729	T	C	26714	29872	M	A69A	SNP_silent	Membrane	M:A69A	T26729C
EPI_ISL_426187	26729	T	C	26713	29871	M	A69A	SNP_silent	Membrane	M:A69A	T26729C
EPI_ISL_426417	26729	T	C	26729	29882	M	A69A	SNP_silent	Membrane	M:A69A	T26729C
EPI_ISL_426504	26729	T	C	26729	29882	M	A69A	SNP_silent	Membrane	M:A69A	T26729C
EPI_ISL_426534	26729	T	C	26729	29882	M	A69A	SNP_silent	Membrane	M:A69A	T26729C
EPI_ISL_426635	26729	T	C	26729	29903	M	A69A	SNP_silent	Membrane	M:A69A	T26729C
EPI_ISL_426640	26729	T	C	26691	29865	M	A69A	SNP_silent	Membrane	M:A69A	T26729C
EPI_ISL_426658	26729	T	C	26725	29899	M	A69A	SNP_silent	Membrane	M:A69A	T26729C
EPI_ISL_427288	26729	T	C	26704	29833	M	A69A	SNP_silent	Membrane	M:A69A	T26729C
EPI_ISL_427433	26729	T	C	26675	29782	M	A69A	SNP_silent	Membrane	M:A69A	T26729C
EPI_ISL_427450	26729	T	C	26675	29782	M	A69A	SNP_silent	Membrane	M:A69A	T26729C
EPI_ISL_427583	26729	T	C	26729	29872	M	A69A	SNP_silent	Membrane	M:A69A	T26729C
EPI_ISL_427726	26729	T	C	26465	29412	M	A69A	SNP_silent	Membrane	M:A69A	T26729C
EPI_ISL_427727	26729	T	C	26465	29412	M	A69A	SNP_silent	Membrane	M:A69A	T26729C
EPI_ISL_427730	26729	T	C	26465	29412	M	A69A	SNP_silent	Membrane	M:A69A	T26729C
EPI_ISL_427732	26729	T	C	26465	29412	M	A69A	SNP_silent	Membrane	M:A69A	T26729C
EPI_ISL_428262	26729	T	C	26675	29782	M	A69A	SNP_silent	Membrane	M:A69A	T26729C
EPI_ISL_428280	26729	T	C	26675	29782	M	A69A	SNP_silent	Membrane	M:A69A	T26729C
EPI_ISL_428285	26729	T	C	26675	29782	M	A69A	SNP_silent	Membrane	M:A69A	T26729C
EPI_ISL_428314	26729	T	C	26675	29782	M	A69A	SNP_silent	Membrane	M:A69A	T26729C
EPI_ISL_428331	26729	T	C	26675	29782	M	A69A	SNP_silent	Membrane	M:A69A	T26729C
EPI_ISL_428341	26729	T	C	26675	29782	M	A69A	SNP_silent	Membrane	M:A69A	T26729C
EPI_ISL_428726	26729	T	C	26675	29782	M	A69A	SNP_silent	Membrane	M:A69A	T26729C
EPI_ISL_429048	26729	T	C	26717	29858	M	A69A	SNP_silent	Membrane	M:A69A	T26729C
EPI_ISL_429970	26729	T	C	26693	29867	M	A69A	SNP_silent	Membrane	M:A69A	T26729C
EPI_ISL_429971	26729	T	C	26724	29856	M	A69A	SNP_silent	Membrane	M:A69A	T26729C
EPI_ISL_430132	26729	T	C	26729	29903	M	A69A	SNP_silent	Membrane	M:A69A	T26729C
EPI_ISL_433277	26729	T	C	26729	29836	M	A69A	SNP_silent	Membrane	M:A69A	T26729C
EPI_ISL_433554	26729	T	C	26675	29782	M	A69A	SNP_silent	Membrane	M:A69A	T26729C
EPI_ISL_433594	26729	T	C	26675	29782	M	A69A	SNP_silent	Membrane	M:A69A	T26729C
EPI_ISL_433660	26729	T	C	26729	29903	M	A69A	SNP_silent	Membrane	M:A69A	T26729C
EPI_ISL_434103	26729	T	C	26729	29903	M	A69A	SNP_silent	Membrane	M:A69A	T26729C
EPI_ISL_434590	26729	T	C	26725	29899	M	A69A	SNP_silent	Membrane	M:A69A	T26729C
EPI_ISL_434591	26729	T	C	26704	29878	M	A69A	SNP_silent	Membrane	M:A69A	T26729C
EPI_ISL_434592	26729	T	C	26725	29899	M	A69A	SNP_silent	Membrane	M:A69A	T26729C
EPI_ISL_434637	26729	T	C	26719	29893	M	A69A	SNP_silent	Membrane	M:A69A	T26729C
EPI_ISL_434686	26729	T	C	26729	29903	M	A69A	SNP_silent	Membrane	M:A69A	T26729C
EPI_ISL_434717	26729	T	C	26729	29903	M	A69A	SNP_silent	Membrane	M:A69A	T26729C
EPI_ISL_434731	26729	T	C	26729	29903	M	A69A	SNP_silent	Membrane	M:A69A	T26729C
EPI_ISL_434732	26729	T	C	26729	29903	M	A69A	SNP_silent	Membrane	M:A69A	T26729C
EPI_ISL_434758	26729	T	C	26729	29903	M	A69A	SNP_silent	Membrane	M:A69A	T26729C
EPI_ISL_434760	26729	T	C	26729	29903	M	A69A	SNP_silent	Membrane	M:A69A	T26729C
EPI_ISL_434766	26729	T	C	26729	29903	M	A69A	SNP_silent	Membrane	M:A69A	T26729C
EPI_ISL_434775	26729	T	C	26729	29903	M	A69A	SNP_silent	Membrane	M:A69A	T26729C
EPI_ISL_434777	26729	T	C	26729	29903	M	A69A	SNP_silent	Membrane	M:A69A	T26729C
EPI_ISL_434788	26729	T	C	26729	29903	M	A69A	SNP_silent	Membrane	M:A69A	T26729C
EPI_ISL_434797	26729	T	C	26729	29903	M	A69A	SNP_silent	Membrane	M:A69A	T26729C
EPI_ISL_434801	26729	T	C	26729	29903	M	A69A	SNP_silent	Membrane	M:A69A	T26729C
EPI_ISL_434809	26729	T	C	26729	29903	M	A69A	SNP_silent	Membrane	M:A69A	T26729C
EPI_ISL_434810	26729	T	C	26729	29903	M	A69A	SNP_silent	Membrane	M:A69A	T26729C
EPI_ISL_434812	26729	T	C	26729	29903	M	A69A	SNP_silent	Membrane	M:A69A	T26729C
EPI_ISL_434813	26729	T	C	26729	29903	M	A69A	SNP_silent	Membrane	M:A69A	T26729C
EPI_ISL_434814	26729	T	C	26729	29903	M	A69A	SNP_silent	Membrane	M:A69A	T26729C
EPI_ISL_434825	26729	T	C	26729	29903	M	A69A	SNP_silent	Membrane	M:A69A	T26729C
EPI_ISL_434826	26729	T	C	26729	29903	M	A69A	SNP_silent	Membrane	M:A69A	T26729C
EPI_ISL_434828	26729	T	C	26729	29903	M	A69A	SNP_silent	Membrane	M:A69A	T26729C
EPI_ISL_434831	26729	T	C	26729	29903	M	A69A	SNP_silent	Membrane	M:A69A	T26729C
EPI_ISL_434835	26729	T	C	26729	29903	M	A69A	SNP_silent	Membrane	M:A69A	T26729C
EPI_ISL_434836	26729	T	C	26729	29903	M	A69A	SNP_silent	Membrane	M:A69A	T26729C
EPI_ISL_434840	26729	T	C	26729	29903	M	A69A	SNP_silent	Membrane	M:A69A	T26729C
EPI_ISL_434854	26729	T	C	26729	29903	M	A69A	SNP_silent	Membrane	M:A69A	T26729C
EPI_ISL_434855	26729	T	C	26729	29903	M	A69A	SNP_silent	Membrane	M:A69A	T26729C
EPI_ISL_434862	26729	T	C	26729	29903	M	A69A	SNP_silent	Membrane	M:A69A	T26729C
EPI_ISL_434867	26729	T	C	26729	29903	M	A69A	SNP_silent	Membrane	M:A69A	T26729C
EPI_ISL_434872	26729	T	C	26729	29903	M	A69A	SNP_silent	Membrane	M:A69A	T26729C
EPI_ISL_434873	26729	T	C	26729	29903	M	A69A	SNP_silent	Membrane	M:A69A	T26729C
EPI_ISL_434882	26729	T	C	26729	29903	M	A69A	SNP_silent	Membrane	M:A69A	T26729C
EPI_ISL_434884	26729	T	C	26729	29903	M	A69A	SNP_silent	Membrane	M:A69A	T26729C
EPI_ISL_434886	26729	T	C	26729	29903	M	A69A	SNP_silent	Membrane	M:A69A	T26729C
EPI_ISL_434887	26729	T	C	26729	29903	M	A69A	SNP_silent	Membrane	M:A69A	T26729C
EPI_ISL_434891	26729	T	C	26729	29903	M	A69A	SNP_silent	Membrane	M:A69A	T26729C
EPI_ISL_434892	26729	T	C	26729	29903	M	A69A	SNP_silent	Membrane	M:A69A	T26729C
EPI_ISL_434896	26729	T	C	26729	29903	M	A69A	SNP_silent	Membrane	M:A69A	T26729C
EPI_ISL_434897	26729	T	C	26729	29903	M	A69A	SNP_silent	Membrane	M:A69A	T26729C
EPI_ISL_434902	26729	T	C	26729	29903	M	A69A	SNP_silent	Membrane	M:A69A	T26729C
EPI_ISL_434904	26729	T	C	26729	29903	M	A69A	SNP_silent	Membrane	M:A69A	T26729C
EPI_ISL_434905	26729	T	C	26729	29903	M	A69A	SNP_silent	Membrane	M:A69A	T26729C
EPI_ISL_434907	26729	T	C	26729	29903	M	A69A	SNP_silent	Membrane	M:A69A	T26729C
EPI_ISL_434916	26729	T	C	26729	29903	M	A69A	SNP_silent	Membrane	M:A69A	T26729C
EPI_ISL_434923	26729	T	C	26729	29903	M	A69A	SNP_silent	Membrane	M:A69A	T26729C
EPI_ISL_434924	26729	T	C	26729	29903	M	A69A	SNP_silent	Membrane	M:A69A	T26729C
EPI_ISL_434925	26729	T	C	26729	29903	M	A69A	SNP_silent	Membrane	M:A69A	T26729C
EPI_ISL_434932	26729	T	C	26729	29903	M	A69A	SNP_silent	Membrane	M:A69A	T26729C
EPI_ISL_434934	26729	T	C	26729	29903	M	A69A	SNP_silent	Membrane	M:A69A	T26729C
EPI_ISL_434953	26729	T	C	26729	29903	M	A69A	SNP_silent	Membrane	M:A69A	T26729C
EPI_ISL_434961	26729	T	C	26729	29903	M	A69A	SNP_silent	Membrane	M:A69A	T26729C
EPI_ISL_434967	26729	T	C	26729	29903	M	A69A	SNP_silent	Membrane	M:A69A	T26729C
EPI_ISL_434969	26729	T	C	26729	29903	M	A69A	SNP_silent	Membrane	M:A69A	T26729C
EPI_ISL_434974	26729	T	C	26729	29903	M	A69A	SNP_silent	Membrane	M:A69A	T26729C
EPI_ISL_434978	26729	T	C	26729	29903	M	A69A	SNP_silent	Membrane	M:A69A	T26729C
EPI_ISL_434981	26729	T	C	26729	29903	M	A69A	SNP_silent	Membrane	M:A69A	T26729C
EPI_ISL_434982	26729	T	C	26729	29903	M	A69A	SNP_silent	Membrane	M:A69A	T26729C
EPI_ISL_434983	26729	T	C	26729	29903	M	A69A	SNP_silent	Membrane	M:A69A	T26729C
EPI_ISL_434986	26729	T	C	26729	29903	M	A69A	SNP_silent	Membrane	M:A69A	T26729C
EPI_ISL_434987	26729	T	C	26729	29903	M	A69A	SNP_silent	Membrane	M:A69A	T26729C
EPI_ISL_435006	26729	T	C	26729	29903	M	A69A	SNP_silent	Membrane	M:A69A	T26729C
EPI_ISL_435013	26729	T	C	26729	29903	M	A69A	SNP_silent	Membrane	M:A69A	T26729C
EPI_ISL_435014	26729	T	C	26729	29903	M	A69A	SNP_silent	Membrane	M:A69A	T26729C
EPI_ISL_435015	26729	T	C	26729	29903	M	A69A	SNP_silent	Membrane	M:A69A	T26729C
EPI_ISL_435018	26729	T	C	26729	29903	M	A69A	SNP_silent	Membrane	M:A69A	T26729C
EPI_ISL_435026	26729	T	C	26729	29903	M	A69A	SNP_silent	Membrane	M:A69A	T26729C
EPI_ISL_435029	26729	T	C	26729	29903	M	A69A	SNP_silent	Membrane	M:A69A	T26729C
EPI_ISL_436820	26729	T	C	26729	29903	M	A69A	SNP_silent	Membrane	M:A69A	T26729C
EPI_ISL_436828	26729	T	C	26729	29903	M	A69A	SNP_silent	Membrane	M:A69A	T26729C
EPI_ISL_436833	26729	T	C	26729	29903	M	A69A	SNP_silent	Membrane	M:A69A	T26729C
EPI_ISL_436865	26729	T	C	26729	29903	M	A69A	SNP_silent	Membrane	M:A69A	T26729C
EPI_ISL_437122	26729	T	C	26729	29903	M	A69A	SNP_silent	Membrane	M:A69A	T26729C
EPI_ISL_437129	26729	T	C	26729	29903	M	A69A	SNP_silent	Membrane	M:A69A	T26729C
EPI_ISL_437137	26729	T	C	26729	29903	M	A69A	SNP_silent	Membrane	M:A69A	T26729C
EPI_ISL_437139	26729	T	C	26729	29903	M	A69A	SNP_silent	Membrane	M:A69A	T26729C
EPI_ISL_437145	26729	T	C	26729	29903	M	A69A	SNP_silent	Membrane	M:A69A	T26729C
EPI_ISL_437374	26729	T	C	26725	29862	M	A69A	SNP_silent	Membrane	M:A69A	T26729C
EPI_ISL_437455	26729	T	C	26729	29903	M	A69A	SNP_silent	Membrane	M:A69A	T26729C
EPI_ISL_438234	26729	T	C	26729	29903	M	A69A	SNP_silent	Membrane	M:A69A	T26729C
EPI_ISL_438241	26729	T	C	26729	29903	M	A69A	SNP_silent	Membrane	M:A69A	T26729C
EPI_ISL_438246	26729	T	C	26729	29903	M	A69A	SNP_silent	Membrane	M:A69A	T26729C
EPI_ISL_438829	26729	T	C	26675	29782	M	A69A	SNP_silent	Membrane	M:A69A	T26729C
EPI_ISL_438841	26729	T	C	26675	29811	M	A69A	SNP_silent	Membrane	M:A69A	T26729C
EPI_ISL_438911	26729	T	C	26675	29782	M	A69A	SNP_silent	Membrane	M:A69A	T26729C
EPI_ISL_439126	26729	T	C	26675	29782	M	A69A	SNP_silent	Membrane	M:A69A	T26729C
EPI_ISL_444530	26729	T	C	26729	29903	M	A69A	SNP_silent	Membrane	M:A69A	T26729C
EPI_ISL_444539	26729	T	C	26729	29903	M	A69A	SNP_silent	Membrane	M:A69A	T26729C
EPI_ISL_444543	26729	T	C	26729	29903	M	A69A	SNP_silent	Membrane	M:A69A	T26729C
EPI_ISL_444549	26729	T	C	26729	29903	M	A69A	SNP_silent	Membrane	M:A69A	T26729C
EPI_ISL_444555	26729	T	C	26729	29903	M	A69A	SNP_silent	Membrane	M:A69A	T26729C
EPI_ISL_444559	26729	T	C	26729	29903	M	A69A	SNP_silent	Membrane	M:A69A	T26729C
EPI_ISL_444561	26729	T	C	26729	29903	M	A69A	SNP_silent	Membrane	M:A69A	T26729C
EPI_ISL_444562	26729	T	C	26729	29903	M	A69A	SNP_silent	Membrane	M:A69A	T26729C
EPI_ISL_444563	26729	T	C	26729	29903	M	A69A	SNP_silent	Membrane	M:A69A	T26729C
EPI_ISL_444564	26729	T	C	26729	29903	M	A69A	SNP_silent	Membrane	M:A69A	T26729C
EPI_ISL_444565	26729	T	C	26729	29903	M	A69A	SNP_silent	Membrane	M:A69A	T26729C
EPI_ISL_444566	26729	T	C	26729	29903	M	A69A	SNP_silent	Membrane	M:A69A	T26729C
EPI_ISL_444567	26729	T	C	26729	29903	M	A69A	SNP_silent	Membrane	M:A69A	T26729C
EPI_ISL_444569	26729	T	C	26729	29903	M	A69A	SNP_silent	Membrane	M:A69A	T26729C
EPI_ISL_444572	26729	T	C	26729	29903	M	A69A	SNP_silent	Membrane	M:A69A	T26729C
EPI_ISL_444577	26729	T	C	26729	29903	M	A69A	SNP_silent	Membrane	M:A69A	T26729C
EPI_ISL_444585	26729	T	C	26729	29903	M	A69A	SNP_silent	Membrane	M:A69A	T26729C
EPI_ISL_444594	26729	T	C	26729	29903	M	A69A	SNP_silent	Membrane	M:A69A	T26729C
EPI_ISL_444596	26729	T	C	26729	29903	M	A69A	SNP_silent	Membrane	M:A69A	T26729C
EPI_ISL_444597	26729	T	C	26729	29903	M	A69A	SNP_silent	Membrane	M:A69A	T26729C
EPI_ISL_444602	26729	T	C	26729	29903	M	A69A	SNP_silent	Membrane	M:A69A	T26729C
EPI_ISL_444603	26729	T	C	26729	29903	M	A69A	SNP_silent	Membrane	M:A69A	T26729C
EPI_ISL_444604	26729	T	C	26729	29903	M	A69A	SNP_silent	Membrane	M:A69A	T26729C
EPI_ISL_444682	26729	T	C	26729	29903	M	A69A	SNP_silent	Membrane	M:A69A	T26729C
EPI_ISL_445024	26729	T	C	26695	29805	M	A69A	SNP_silent	Membrane	M:A69A	T26729C
EPI_ISL_445084	26729	T	C	26724	29866	M	A69A	SNP_silent	Membrane	M:A69A	T26729C
EPI_ISL_447173	26729	T	C	26729	29903	M	A69A	SNP_silent	Membrane	M:A69A	T26729C
EPI_ISL_447192	26729	T	C	26729	29874	M	A69A	SNP_silent	Membrane	M:A69A	T26729C
EPI_ISL_447201	26729	T	C	26729	29903	M	A69A	SNP_silent	Membrane	M:A69A	T26729C
EPI_ISL_447212	26729	T	C	26729	29903	M	A69A	SNP_silent	Membrane	M:A69A	T26729C
EPI_ISL_450115	26729	T	C	26667	29716	M	A69A	SNP_silent	Membrane	M:A69A	T26729C
EPI_ISL_450139	26729	T	C	26669	29719	M	A69A	SNP_silent	Membrane	M:A69A	T26729C
EPI_ISL_450212	26729	T	C	26675	29782	M	A69A	SNP_silent	Membrane	M:A69A	T26729C
EPI_ISL_450213	26729	T	C	26683	29793	M	A69A	SNP_silent	Membrane	M:A69A	T26729C
EPI_ISL_450583	26729	T	C	26729	29903	M	A69A	SNP_silent	Membrane	M:A69A	T26729C
EPI_ISL_450703	26729	T	C	26675	29782	M	A69A	SNP_silent	Membrane	M:A69A	T26729C
EPI_ISL_450802	26729	T	C	26729	29882	M	A69A	SNP_silent	Membrane	M:A69A	T26729C
EPI_ISL_450849	26729	T	C	26727	29901	M	A69A	SNP_silent	Membrane	M:A69A	T26729C
EPI_ISL_451148	26729	T	C	26693	29867	M	A69A	SNP_silent	Membrane	M:A69A	T26729C
EPI_ISL_451443	26729	T	C	26729	29903	M	A69A	SNP_silent	Membrane	M:A69A	T26729C
EPI_ISL_451468	26729	T	C	26729	29903	M	A69A	SNP_silent	Membrane	M:A69A	T26729C
EPI_ISL_451634	26729	T	C	26463	29408	M	A69A	SNP_silent	Membrane	M:A69A	T26729C
EPI_ISL_452111	26729	T	C	26729	29882	M	A69A	SNP_silent	Membrane	M:A69A	T26729C
EPI_ISL_452113	26729	T	C	26729	29882	M	A69A	SNP_silent	Membrane	M:A69A	T26729C
EPI_ISL_452115	26729	T	C	26729	29882	M	A69A	SNP_silent	Membrane	M:A69A	T26729C
EPI_ISL_452125	26729	T	C	26729	29882	M	A69A	SNP_silent	Membrane	M:A69A	T26729C
EPI_ISL_452131	26729	T	C	26729	29882	M	A69A	SNP_silent	Membrane	M:A69A	T26729C
EPI_ISL_452268	26729	T	C	26729	29903	M	A69A	SNP_silent	Membrane	M:A69A	T26729C
EPI_ISL_452325	26729	T	C	26729	29903	M	A69A	SNP_silent	Membrane	M:A69A	T26729C
EPI_ISL_454384	26729	T	C	26729	29840	M	A69A	SNP_silent	Membrane	M:A69A	T26729C
EPI_ISL_454387	26729	T	C	26729	29840	M	A69A	SNP_silent	Membrane	M:A69A	T26729C
EPI_ISL_454430	26729	T	C	26729	29862	M	A69A	SNP_silent	Membrane	M:A69A	T26729C
EPI_ISL_454431	26729	T	C	26725	29857	M	A69A	SNP_silent	Membrane	M:A69A	T26729C
EPI_ISL_454638	26729	T	C	26694	29868	M	A69A	SNP_silent	Membrane	M:A69A	T26729C
EPI_ISL_454639	26729	T	C	26729	29903	M	A69A	SNP_silent	Membrane	M:A69A	T26729C
EPI_ISL_454800	26729	T	C	26704	29834	M	A69A	SNP_silent	Membrane	M:A69A	T26729C
EPI_ISL_454801	26729	T	C	26704	29834	M	A69A	SNP_silent	Membrane	M:A69A	T26729C
EPI_ISL_454806	26729	T	C	26705	29847	M	A69A	SNP_silent	Membrane	M:A69A	T26729C
EPI_ISL_454808	26729	T	C	26704	29834	M	A69A	SNP_silent	Membrane	M:A69A	T26729C
EPI_ISL_454817	26729	T	C	26704	29834	M	A69A	SNP_silent	Membrane	M:A69A	T26729C
EPI_ISL_454824	26729	T	C	26704	29835	M	A69A	SNP_silent	Membrane	M:A69A	T26729C
EPI_ISL_454826	26729	T	C	26704	29845	M	A69A	SNP_silent	Membrane	M:A69A	T26729C
EPI_ISL_454974	26729	T	C	26729	29903	M	A69A	SNP_silent	Membrane	M:A69A	T26729C
EPI_ISL_455355	26729	T	C	26723	29872	M	A69A	SNP_silent	Membrane	M:A69A	T26729C
EPI_ISL_455356	26729	T	C	26682	29815	M	A69A	SNP_silent	Membrane	M:A69A	T26729C
EPI_ISL_455360	26729	T	C	26682	29817	M	A69A	SNP_silent	Membrane	M:A69A	T26729C
EPI_ISL_456172	26729	T	C	26729	29903	M	A69A	SNP_silent	Membrane	M:A69A	T26729C
EPI_ISL_456200	26729	T	C	26729	29903	M	A69A	SNP_silent	Membrane	M:A69A	T26729C
EPI_ISL_457756	26729	T	C	26729	29903	M	A69A	SNP_silent	Membrane	M:A69A	T26729C
EPI_ISL_457762	26729	T	C	26729	29903	M	A69A	SNP_silent	Membrane	M:A69A	T26729C
EPI_ISL_457767	26729	T	C	26729	29903	M	A69A	SNP_silent	Membrane	M:A69A	T26729C
EPI_ISL_457768	26729	T	C	26729	29903	M	A69A	SNP_silent	Membrane	M:A69A	T26729C
EPI_ISL_457782	26729	T	C	26729	29903	M	A69A	SNP_silent	Membrane	M:A69A	T26729C
EPI_ISL_457783	26729	T	C	26729	29903	M	A69A	SNP_silent	Membrane	M:A69A	T26729C
EPI_ISL_457789	26729	T	C	26729	29903	M	A69A	SNP_silent	Membrane	M:A69A	T26729C
EPI_ISL_457807	26729	T	C	26729	29903	M	A69A	SNP_silent	Membrane	M:A69A	T26729C
EPI_ISL_457813	26729	T	C	26729	29903	M	A69A	SNP_silent	Membrane	M:A69A	T26729C
EPI_ISL_460052	26729	T	C	26684	29814	M	A69A	SNP_silent	Membrane	M:A69A	T26729C
EPI_ISL_460072	26729	T	C	26725	29849	M	A69A	SNP_silent	Membrane	M:A69A	T26729C
EPI_ISL_460114	26729	T	C	26723	29872	M	A69A	SNP_silent	Membrane	M:A69A	T26729C
EPI_ISL_460170	26729	T	C	26723	29877	M	A69A	SNP_silent	Membrane	M:A69A	T26729C
EPI_ISL_460179	26729	T	C	26664	29797	M	A69A	SNP_silent	Membrane	M:A69A	T26729C
EPI_ISL_460186	26729	T	C	26711	29852	M	A69A	SNP_silent	Membrane	M:A69A	T26729C
EPI_ISL_460205	26729	T	C	26690	29825	M	A69A	SNP_silent	Membrane	M:A69A	T26729C
EPI_ISL_460232	26729	T	C	26703	29846	M	A69A	SNP_silent	Membrane	M:A69A	T26729C
EPI_ISL_460285	26729	T	C	26701	29838	M	A69A	SNP_silent	Membrane	M:A69A	T26729C
EPI_ISL_460467	26729	T	C	26725	29877	M	A69A	SNP_silent	Membrane	M:A69A	T26729C
EPI_ISL_462350	26729	T	C	26729	29891	M	A69A	SNP_silent	Membrane	M:A69A	T26729C
EPI_ISL_462922	26729	T	C	26715	29889	M	A69A	SNP_silent	Membrane	M:A69A	T26729C
EPI_ISL_462991	26729	T	C	26730	29902	M	A69A	SNP_silent	Membrane	M:A69A	T26729C
EPI_ISL_463740	26729	T	C	26729	29903	M	A69A	SNP_silent	Membrane	M:A69A	T26729C
EPI_ISL_463993	26729	T	C	26722	29853	M	A69A	SNP_silent	Membrane	M:A69A	T26729C
EPI_ISL_464093	26729	T	C	26729	29901	M	A69A	SNP_silent	Membrane	M:A69A	T26729C
EPI_ISL_464167	26729	T	C	26729	29882	M	A69A	SNP_silent	Membrane	M:A69A	T26729C
EPI_ISL_465686	26729	T	C	26726	29873	M	A69A	SNP_silent	Membrane	M:A69A	T26729C
EPI_ISL_466716	26729	T	C	26729	29903	M	A69A	SNP_silent	Membrane	M:A69A	T26729C
EPI_ISL_467387	26729	T	C	26729	29903	M	A69A	SNP_silent	Membrane	M:A69A	T26729C
EPI_ISL_467814	26729	T	C	26675	29782	M	A69A	SNP_silent	Membrane	M:A69A	T26729C
EPI_ISL_467845	26729	T	C	26675	29782	M	A69A	SNP_silent	Membrane	M:A69A	T26729C
EPI_ISL_467846	26729	T	C	26675	29782	M	A69A	SNP_silent	Membrane	M:A69A	T26729C
EPI_ISL_467847	26729	T	C	26675	29782	M	A69A	SNP_silent	Membrane	M:A69A	T26729C
EPI_ISL_467848	26729	T	C	26675	29782	M	A69A	SNP_silent	Membrane	M:A69A	T26729C
EPI_ISL_467849	26729	T	C	26675	29782	M	A69A	SNP_silent	Membrane	M:A69A	T26729C
EPI_ISL_467855	26729	T	C	26675	29782	M	A69A	SNP_silent	Membrane	M:A69A	T26729C
EPI_ISL_467862	26729	T	C	26675	29782	M	A69A	SNP_silent	Membrane	M:A69A	T26729C
EPI_ISL_467871	26729	T	C	26675	29782	M	A69A	SNP_silent	Membrane	M:A69A	T26729C
EPI_ISL_467897	26729	T	C	26675	29782	M	A69A	SNP_silent	Membrane	M:A69A	T26729C
EPI_ISL_467910	26729	T	C	26675	29782	M	A69A	SNP_silent	Membrane	M:A69A	T26729C
EPI_ISL_467919	26729	T	C	26675	29782	M	A69A	SNP_silent	Membrane	M:A69A	T26729C
EPI_ISL_467920	26729	T	C	26675	29782	M	A69A	SNP_silent	Membrane	M:A69A	T26729C
EPI_ISL_467921	26729	T	C	26675	29782	M	A69A	SNP_silent	Membrane	M:A69A	T26729C
EPI_ISL_468000	26729	T	C	26692	29866	M	A69A	SNP_silent	Membrane	M:A69A	T26729C
EPI_ISL_468455	26729	T	C	26692	29813	M	A69A	SNP_silent	Membrane	M:A69A	T26729C
EPI_ISL_468460	26729	T	C	26692	29816	M	A69A	SNP_silent	Membrane	M:A69A	T26729C
EPI_ISL_468563	26729	T	C	26729	29903	M	A69A	SNP_silent	Membrane	M:A69A	T26729C
EPI_ISL_471213	26729	T	C	26675	29782	M	A69A	SNP_silent	Membrane	M:A69A	T26729C
EPI_ISL_471226	26729	T	C	26675	29782	M	A69A	SNP_silent	Membrane	M:A69A	T26729C
EPI_ISL_471258	26729	T	C	26675	29782	M	A69A	SNP_silent	Membrane	M:A69A	T26729C
EPI_ISL_471453	26729	T	C	26631	29772	M	A69A	SNP_silent	Membrane	M:A69A	T26729C
EPI_ISL_471858	26729	T	C	26729	29903	M	A69A	SNP_silent	Membrane	M:A69A	T26729C
EPI_ISL_406034	26729	T	C	26729	29882	M	A69A	SNP_silent	Membrane	M:A69A	T26729C
EPI_ISL_416409	26729	T	C	26699	29836	M	A69A	SNP_silent	Membrane	M:A69A	T26729C
EPI_ISL_412028	26729	T	C	26716	29851	M	A69A	SNP_silent	Membrane	M:A69A	T26729C
EPI_ISL_417176	26729	T	C	26729	29903	M	A69A	SNP_silent	Membrane	M:A69A	T26729C
EPI_ISL_434571	26729	T	C	26729	29891	M	A69A	SNP_silent	Membrane	M:A69A	T26729C
EPI_ISL_456656	26729	T	C	26715	29829	M	A69A	SNP_silent	Membrane	M:A69A	T26729C
EPI_ISL_408484	26729	T	C	26729	29891	M	A69A	SNP_silent	Membrane	M:A69A	T26729C
EPI_ISL_408485	26729	T	C	26728	29890	M	A69A	SNP_silent	Membrane	M:A69A	T26729C
EPI_ISL_416338	26729	T	C	26699	29836	M	A69A	SNP_silent	Membrane	M:A69A	T26729C
EPI_ISL_416341	26729	T	C	26698	29835	M	A69A	SNP_silent	Membrane	M:A69A	T26729C
EPI_ISL_416357	26729	T	C	26698	29835	M	A69A	SNP_silent	Membrane	M:A69A	T26729C
EPI_ISL_416381	26729	T	C	26699	29836	M	A69A	SNP_silent	Membrane	M:A69A	T26729C
EPI_ISL_416429	26729	T	C	26729	29871	M	A69A	SNP_silent	Membrane	M:A69A	T26729C
EPI_ISL_428443	26729	T	C	26729	29866	M	A69A	SNP_silent	Membrane	M:A69A	T26729C
EPI_ISL_428457	26729	T	C	26729	29866	M	A69A	SNP_silent	Membrane	M:A69A	T26729C
EPI_ISL_454983	26729	T	C	26729	29903	M	A69A	SNP_silent	Membrane	M:A69A	T26729C
EPI_ISL_427204	26730	G	A	26706	29844	M	V70I	SNP	Membrane	M:V70I	G26730A
EPI_ISL_430918	26730	G	A	26700	29834	M	V70I	SNP	Membrane	M:V70I	G26730A
EPI_ISL_455653	26730	G	T	26730	29903	M	V70F	SNP	Membrane	M:V70F	G26730T
EPI_ISL_455675	26730	G	T	26730	29903	M	V70F	SNP	Membrane	M:V70F	G26730T
EPI_ISL_420591	26730	G	T	26730	29903	M	V70F	SNP	Membrane	M:V70F	G26730T
EPI_ISL_422541	26730	G	T	26675	29724	M	V70F	SNP	Membrane	M:V70F	G26730T
EPI_ISL_428354	26730	G	T	26730	29864	M	V70F	SNP	Membrane	M:V70F	G26730T
EPI_ISL_430352	26730	G	T	26730	29903	M	V70F	SNP	Membrane	M:V70F	G26730T
EPI_ISL_430360	26730	G	T	26730	29903	M	V70F	SNP	Membrane	M:V70F	G26730T
EPI_ISL_430369	26730	G	T	26730	29903	M	V70F	SNP	Membrane	M:V70F	G26730T
EPI_ISL_430499	26730	G	T	26730	29903	M	V70F	SNP	Membrane	M:V70F	G26730T
EPI_ISL_434606	26730	G	T	26695	29868	M	V70F	SNP	Membrane	M:V70F	G26730T
EPI_ISL_434640	26730	G	T	26730	29903	M	V70F	SNP	Membrane	M:V70F	G26730T
EPI_ISL_434683	26730	G	T	26730	29903	M	V70F	SNP	Membrane	M:V70F	G26730T
EPI_ISL_437628	26730	G	T	26730	29903	M	V70F	SNP	Membrane	M:V70F	G26730T
EPI_ISL_437763	26730	G	T	26692	29865	M	V70F	SNP	Membrane	M:V70F	G26730T
EPI_ISL_437764	26730	G	T	26724	29860	M	V70F	SNP	Membrane	M:V70F	G26730T
EPI_ISL_437786	26730	G	T	26728	29867	M	V70F	SNP	Membrane	M:V70F	G26730T
EPI_ISL_438247	26730	G	T	26730	29903	M	V70F	SNP	Membrane	M:V70F	G26730T
EPI_ISL_442462	26730	G	T	26730	29903	M	V70F	SNP	Membrane	M:V70F	G26730T
EPI_ISL_445488	26730	G	T	26729	29902	M	V70F	SNP	Membrane	M:V70F	G26730T
EPI_ISL_450454	26730	G	T	26730	29903	M	V70F	SNP	Membrane	M:V70F	G26730T
EPI_ISL_452798	26730	G	T	26722	29864	M	V70F	SNP	Membrane	M:V70F	G26730T
EPI_ISL_452799	26730	G	T	26718	29891	M	V70F	SNP	Membrane	M:V70F	G26730T
EPI_ISL_452850	26730	G	T	26726	29865	M	V70F	SNP	Membrane	M:V70F	G26730T
EPI_ISL_455663	26730	G	T	26730	29903	M	V70F	SNP	Membrane	M:V70F	G26730T
EPI_ISL_455668	26730	G	T	26730	29903	M	V70F	SNP	Membrane	M:V70F	G26730T
EPI_ISL_456092	26730	G	T	26676	29714	M	V70F	SNP	Membrane	M:V70F	G26730T
EPI_ISL_457777	26730	G	T	26730	29903	M	V70F	SNP	Membrane	M:V70F	G26730T
EPI_ISL_464164	26730	G	T	26730	29903	M	V70F	SNP	Membrane	M:V70F	G26730T
EPI_ISL_465266	26730	G	A	26730	29903	M	V70I	SNP	Membrane	M:V70I	G26730A
EPI_ISL_465270	26730	G	A	26730	29903	M	V70I	SNP	Membrane	M:V70I	G26730A
EPI_ISL_465271	26730	G	A	26730	29903	M	V70I	SNP	Membrane	M:V70I	G26730A
EPI_ISL_466847	26730	G	C	26730	29866	M	V70L	SNP	Membrane	M:V70L	G26730C
EPI_ISL_466848	26730	G	C	26730	29867	M	V70L	SNP	Membrane	M:V70L	G26730C
EPI_ISL_471268	26730	G	T	26730	29903	M	V70F	SNP	Membrane	M:V70F	G26730T
EPI_ISL_472584	26730	G	T	26722	29895	M	V70F	SNP	Membrane	M:V70F	G26730T
EPI_ISL_473024	26730	G	T	26727	29900	M	V70F	SNP	Membrane	M:V70F	G26730T
EPI_ISL_473941	26730	G	T	26730	29903	M	V70F	SNP	Membrane	M:V70F	G26730T
EPI_ISL_474116	26730	G	T	26693	29866	M	V70F	SNP	Membrane	M:V70F	G26730T
EPI_ISL_415618	26730	G	A	26652	29825	M	V70I	SNP	Membrane	M:V70I	G26730A
EPI_ISL_455596	26730	G	T	26730	29903	M	V70F	SNP	Membrane	M:V70F	G26730T
EPI_ISL_468038	26730	G	T	26693	29866	M	V70F	SNP	Membrane	M:V70F	G26730T
EPI_ISL_429397	26730	G	A	26730	29903	M	V70I	SNP	Membrane	M:V70I	G26730A
EPI_ISL_461399	26730	G	A	26535	29551	M	V70I	SNP	Membrane	M:V70I	G26730A
EPI_ISL_416435	26730	G	A	26698	29832	M	V70I	SNP	Membrane	M:V70I	G26730A
EPI_ISL_418883	26730	G	A	26429	29601	M	V70I	SNP	Membrane	M:V70I	G26730A
EPI_ISL_424241	26730	G	A	26587	29759	M	V70I	SNP	Membrane	M:V70I	G26730A
EPI_ISL_427177	26730	G	A	26699	29831	M	V70I	SNP	Membrane	M:V70I	G26730A
EPI_ISL_434270	26730	G	A	26730	29903	M	V70I	SNP	Membrane	M:V70I	G26730A
EPI_ISL_461428	26730	G	A	26699	29844	M	V70I	SNP	Membrane	M:V70I	G26730A
EPI_ISL_413487	26730	G	A	26152	29325	M	V70I	SNP	Membrane	M:V70I	G26730A
EPI_ISL_422989	26730	G	A	26592	29756	M	V70I	SNP	Membrane	M:V70I	G26730A
EPI_ISL_423017	26730	G	A	26695	29864	M	V70I	SNP	Membrane	M:V70I	G26730A
EPI_ISL_424230	26730	G	A	26551	29734	M	V70I	SNP	Membrane	M:V70I	G26730A
EPI_ISL_438143	26730	G	A	26730	29903	M	V70I	SNP	Membrane	M:V70I	G26730A
EPI_ISL_438146	26730	G	A	26730	29903	M	V70I	SNP	Membrane	M:V70I	G26730A
EPI_ISL_463029	26730	G	T	26730	29688	M	V70F	SNP	Membrane	M:V70F	G26730T
EPI_ISL_463058	26730	G	T	26730	29805	M	V70F	SNP	Membrane	M:V70F	G26730T
EPI_ISL_473700	26731	T	C	26677	29782	M	V70A	SNP	Membrane	M:V70A	T26731C
EPI_ISL_469138	26731	T	C	26731	29891	M	V70A	SNP	Membrane	M:V70A	T26731C
EPI_ISL_422586	26732	T	C	26678	29775	M	V70V	SNP_silent	Membrane	M:V70V	T26732C
EPI_ISL_422602	26732	T	C	26678	29775	M	V70V	SNP_silent	Membrane	M:V70V	T26732C
EPI_ISL_444465	26735	C	T	26735	29903	M	Y71Y	SNP_silent	Membrane	M:Y71Y	C26735T
EPI_ISL_463061	26735	C	T	26735	29685	M	Y71Y	SNP_silent	Membrane	M:Y71Y	C26735T
EPI_ISL_437464	26735	C	T	26717	29848	M	Y71Y	SNP_silent	Membrane	M:Y71Y	C26735T
EPI_ISL_437489	26735	C	T	26735	29903	M	Y71Y	SNP_silent	Membrane	M:Y71Y	C26735T
EPI_ISL_437490	26735	C	T	26735	29903	M	Y71Y	SNP_silent	Membrane	M:Y71Y	C26735T
EPI_ISL_437762	26735	C	T	26735	29903	M	Y71Y	SNP_silent	Membrane	M:Y71Y	C26735T
EPI_ISL_467946	26735	C	T	26728	29896	M	Y71Y	SNP_silent	Membrane	M:Y71Y	C26735T
EPI_ISL_458103	26735	C	T	26735	29903	M	Y71Y	SNP_silent	Membrane	M:Y71Y	C26735T
EPI_ISL_461504	26735	C	T	26735	29903	M	Y71Y	SNP_silent	Membrane	M:Y71Y	C26735T
EPI_ISL_461501	26735	C	T	26735	29903	M	Y71Y	SNP_silent	Membrane	M:Y71Y	C26735T
EPI_ISL_461502	26735	C	T	26735	29903	M	Y71Y	SNP_silent	Membrane	M:Y71Y	C26735T
EPI_ISL_416521	26735	C	T	26743	29899	M	Y71Y	SNP_silent	Membrane	M:Y71Y	C26735T
EPI_ISL_416522	26735	C	T	26743	29899	M	Y71Y	SNP_silent	Membrane	M:Y71Y	C26735T
EPI_ISL_418392	26735	C	T	26737	29814	M	Y71Y	SNP_silent	Membrane	M:Y71Y	C26735T
EPI_ISL_418393	26735	C	T	26737	29811	M	Y71Y	SNP_silent	Membrane	M:Y71Y	C26735T
EPI_ISL_418394	26735	C	T	26737	29814	M	Y71Y	SNP_silent	Membrane	M:Y71Y	C26735T
EPI_ISL_418395	26735	C	T	26737	29811	M	Y71Y	SNP_silent	Membrane	M:Y71Y	C26735T
EPI_ISL_418401	26735	C	T	26737	29811	M	Y71Y	SNP_silent	Membrane	M:Y71Y	C26735T
EPI_ISL_418404	26735	C	T	26737	29813	M	Y71Y	SNP_silent	Membrane	M:Y71Y	C26735T
EPI_ISL_418406	26735	C	T	26737	29815	M	Y71Y	SNP_silent	Membrane	M:Y71Y	C26735T
EPI_ISL_420223	26735	C	T	26735	29903	M	Y71Y	SNP_silent	Membrane	M:Y71Y	C26735T
EPI_ISL_425631	26735	C	T	26735	29903	M	Y71Y	SNP_silent	Membrane	M:Y71Y	C26735T
EPI_ISL_428909	26735	C	T	26735	29903	M	Y71Y	SNP_silent	Membrane	M:Y71Y	C26735T
EPI_ISL_429544	26735	C	T	26735	29903	M	Y71Y	SNP_silent	Membrane	M:Y71Y	C26735T
EPI_ISL_430819	26735	C	T	26582	29709	M	Y71Y	SNP_silent	Membrane	M:Y71Y	C26735T
EPI_ISL_432494	26735	C	T	26735	29903	M	Y71Y	SNP_silent	Membrane	M:Y71Y	C26735T
EPI_ISL_432505	26735	C	T	26735	29903	M	Y71Y	SNP_silent	Membrane	M:Y71Y	C26735T
EPI_ISL_432636	26735	C	T	26735	29903	M	Y71Y	SNP_silent	Membrane	M:Y71Y	C26735T
EPI_ISL_433402	26735	C	T	26735	29903	M	Y71Y	SNP_silent	Membrane	M:Y71Y	C26735T
EPI_ISL_433661	26735	C	T	26735	29903	M	Y71Y	SNP_silent	Membrane	M:Y71Y	C26735T
EPI_ISL_435055	26735	C	T	26735	29903	M	Y71Y	SNP_silent	Membrane	M:Y71Y	C26735T
EPI_ISL_435065	26735	C	T	26735	29867	M	Y71Y	SNP_silent	Membrane	M:Y71Y	C26735T
EPI_ISL_435066	26735	C	T	26735	29866	M	Y71Y	SNP_silent	Membrane	M:Y71Y	C26735T
EPI_ISL_435067	26735	C	T	26735	29866	M	Y71Y	SNP_silent	Membrane	M:Y71Y	C26735T
EPI_ISL_435068	26735	C	T	26735	29866	M	Y71Y	SNP_silent	Membrane	M:Y71Y	C26735T
EPI_ISL_435069	26735	C	T	26735	29871	M	Y71Y	SNP_silent	Membrane	M:Y71Y	C26735T
EPI_ISL_436370	26735	C	T	26697	29798	M	Y71Y	SNP_silent	Membrane	M:Y71Y	C26735T
EPI_ISL_436459	26735	C	T	26735	29866	M	Y71Y	SNP_silent	Membrane	M:Y71Y	C26735T
EPI_ISL_437188	26735	C	T	26735	29903	M	Y71Y	SNP_silent	Membrane	M:Y71Y	C26735T
EPI_ISL_437199	26735	C	T	26735	29903	M	Y71Y	SNP_silent	Membrane	M:Y71Y	C26735T
EPI_ISL_437200	26735	C	T	26735	29903	M	Y71Y	SNP_silent	Membrane	M:Y71Y	C26735T
EPI_ISL_437202	26735	C	T	26735	29903	M	Y71Y	SNP_silent	Membrane	M:Y71Y	C26735T
EPI_ISL_437298	26735	C	T	26735	29903	M	Y71Y	SNP_silent	Membrane	M:Y71Y	C26735T
EPI_ISL_437299	26735	C	T	26735	29903	M	Y71Y	SNP_silent	Membrane	M:Y71Y	C26735T
EPI_ISL_437440	26735	C	T	26732	29900	M	Y71Y	SNP_silent	Membrane	M:Y71Y	C26735T
EPI_ISL_437445	26735	C	T	26735	29903	M	Y71Y	SNP_silent	Membrane	M:Y71Y	C26735T
EPI_ISL_437446	26735	C	T	26735	29903	M	Y71Y	SNP_silent	Membrane	M:Y71Y	C26735T
EPI_ISL_437449	26735	C	T	26735	29903	M	Y71Y	SNP_silent	Membrane	M:Y71Y	C26735T
EPI_ISL_437452	26735	C	T	26735	29903	M	Y71Y	SNP_silent	Membrane	M:Y71Y	C26735T
EPI_ISL_437469	26735	C	T	26721	29846	M	Y71Y	SNP_silent	Membrane	M:Y71Y	C26735T
EPI_ISL_437470	26735	C	T	26722	29860	M	Y71Y	SNP_silent	Membrane	M:Y71Y	C26735T
EPI_ISL_437471	26735	C	T	26722	29890	M	Y71Y	SNP_silent	Membrane	M:Y71Y	C26735T
EPI_ISL_437472	26735	C	T	26718	29884	M	Y71Y	SNP_silent	Membrane	M:Y71Y	C26735T
EPI_ISL_437473	26735	C	T	26707	29875	M	Y71Y	SNP_silent	Membrane	M:Y71Y	C26735T
EPI_ISL_437474	26735	C	T	26687	29825	M	Y71Y	SNP_silent	Membrane	M:Y71Y	C26735T
EPI_ISL_437476	26735	C	T	26140	29967	M	Y71Y	SNP_silent	Membrane	M:Y71Y	C26735T
EPI_ISL_437477	26735	C	T	26723	29861	M	Y71Y	SNP_silent	Membrane	M:Y71Y	C26735T
EPI_ISL_437478	26735	C	T	27276	30643	M	Y71Y	SNP_silent	Membrane	M:Y71Y	C26735T
EPI_ISL_437479	26735	C	T	26721	29856	M	Y71Y	SNP_silent	Membrane	M:Y71Y	C26735T
EPI_ISL_437481	26735	C	T	26732	29900	M	Y71Y	SNP_silent	Membrane	M:Y71Y	C26735T
EPI_ISL_437482	26735	C	T	26735	29903	M	Y71Y	SNP_silent	Membrane	M:Y71Y	C26735T
EPI_ISL_437483	26735	C	T	26735	29903	M	Y71Y	SNP_silent	Membrane	M:Y71Y	C26735T
EPI_ISL_437485	26735	C	T	26735	29903	M	Y71Y	SNP_silent	Membrane	M:Y71Y	C26735T
EPI_ISL_437486	26735	C	T	26735	29903	M	Y71Y	SNP_silent	Membrane	M:Y71Y	C26735T
EPI_ISL_437487	26735	C	T	26735	29903	M	Y71Y	SNP_silent	Membrane	M:Y71Y	C26735T
EPI_ISL_437488	26735	C	T	26735	29903	M	Y71Y	SNP_silent	Membrane	M:Y71Y	C26735T
EPI_ISL_437492	26735	C	T	26726	29894	M	Y71Y	SNP_silent	Membrane	M:Y71Y	C26735T
EPI_ISL_437493	26735	C	T	26735	29903	M	Y71Y	SNP_silent	Membrane	M:Y71Y	C26735T
EPI_ISL_437494	26735	C	T	26735	29903	M	Y71Y	SNP_silent	Membrane	M:Y71Y	C26735T
EPI_ISL_437496	26735	C	T	26735	29903	M	Y71Y	SNP_silent	Membrane	M:Y71Y	C26735T
EPI_ISL_437691	26735	C	T	26735	29903	M	Y71Y	SNP_silent	Membrane	M:Y71Y	C26735T
EPI_ISL_437692	26735	C	T	26735	29903	M	Y71Y	SNP_silent	Membrane	M:Y71Y	C26735T
EPI_ISL_437693	26735	C	T	26735	29903	M	Y71Y	SNP_silent	Membrane	M:Y71Y	C26735T
EPI_ISL_437695	26735	C	T	26735	29903	M	Y71Y	SNP_silent	Membrane	M:Y71Y	C26735T
EPI_ISL_437696	26735	C	T	26735	29903	M	Y71Y	SNP_silent	Membrane	M:Y71Y	C26735T
EPI_ISL_437700	26735	C	T	26735	29903	M	Y71Y	SNP_silent	Membrane	M:Y71Y	C26735T
EPI_ISL_437702	26735	C	T	26735	29903	M	Y71Y	SNP_silent	Membrane	M:Y71Y	C26735T
EPI_ISL_437703	26735	C	T	26735	29903	M	Y71Y	SNP_silent	Membrane	M:Y71Y	C26735T
EPI_ISL_437704	26735	C	T	26735	29903	M	Y71Y	SNP_silent	Membrane	M:Y71Y	C26735T
EPI_ISL_437706	26735	C	T	26735	29903	M	Y71Y	SNP_silent	Membrane	M:Y71Y	C26735T
EPI_ISL_437707	26735	C	T	26735	29903	M	Y71Y	SNP_silent	Membrane	M:Y71Y	C26735T
EPI_ISL_437708	26735	C	T	26735	29903	M	Y71Y	SNP_silent	Membrane	M:Y71Y	C26735T
EPI_ISL_437709	26735	C	T	26735	29903	M	Y71Y	SNP_silent	Membrane	M:Y71Y	C26735T
EPI_ISL_437710	26735	C	T	26735	29903	M	Y71Y	SNP_silent	Membrane	M:Y71Y	C26735T
EPI_ISL_437711	26735	C	T	26735	29903	M	Y71Y	SNP_silent	Membrane	M:Y71Y	C26735T
EPI_ISL_437712	26735	C	T	26735	29903	M	Y71Y	SNP_silent	Membrane	M:Y71Y	C26735T
EPI_ISL_437713	26735	C	T	26735	29903	M	Y71Y	SNP_silent	Membrane	M:Y71Y	C26735T
EPI_ISL_437714	26735	C	T	26735	29903	M	Y71Y	SNP_silent	Membrane	M:Y71Y	C26735T
EPI_ISL_437715	26735	C	T	26735	29903	M	Y71Y	SNP_silent	Membrane	M:Y71Y	C26735T
EPI_ISL_437717	26735	C	T	26735	29903	M	Y71Y	SNP_silent	Membrane	M:Y71Y	C26735T
EPI_ISL_437718	26735	C	T	26735	29903	M	Y71Y	SNP_silent	Membrane	M:Y71Y	C26735T
EPI_ISL_437719	26735	C	T	26735	29903	M	Y71Y	SNP_silent	Membrane	M:Y71Y	C26735T
EPI_ISL_437723	26735	C	T	26735	29903	M	Y71Y	SNP_silent	Membrane	M:Y71Y	C26735T
EPI_ISL_437724	26735	C	T	26735	29903	M	Y71Y	SNP_silent	Membrane	M:Y71Y	C26735T
EPI_ISL_437726	26735	C	T	26735	29903	M	Y71Y	SNP_silent	Membrane	M:Y71Y	C26735T
EPI_ISL_437728	26735	C	T	26735	29903	M	Y71Y	SNP_silent	Membrane	M:Y71Y	C26735T
EPI_ISL_437729	26735	C	T	26735	29903	M	Y71Y	SNP_silent	Membrane	M:Y71Y	C26735T
EPI_ISL_437730	26735	C	T	26735	29903	M	Y71Y	SNP_silent	Membrane	M:Y71Y	C26735T
EPI_ISL_437732	26735	C	T	26735	29903	M	Y71Y	SNP_silent	Membrane	M:Y71Y	C26735T
EPI_ISL_437733	26735	C	T	26735	29903	M	Y71Y	SNP_silent	Membrane	M:Y71Y	C26735T
EPI_ISL_437734	26735	C	T	26735	29903	M	Y71Y	SNP_silent	Membrane	M:Y71Y	C26735T
EPI_ISL_437735	26735	C	T	26735	29903	M	Y71Y	SNP_silent	Membrane	M:Y71Y	C26735T
EPI_ISL_437736	26735	C	T	26735	29903	M	Y71Y	SNP_silent	Membrane	M:Y71Y	C26735T
EPI_ISL_437737	26735	C	T	26735	29903	M	Y71Y	SNP_silent	Membrane	M:Y71Y	C26735T
EPI_ISL_437738	26735	C	T	26735	29903	M	Y71Y	SNP_silent	Membrane	M:Y71Y	C26735T
EPI_ISL_437739	26735	C	T	26735	29903	M	Y71Y	SNP_silent	Membrane	M:Y71Y	C26735T
EPI_ISL_437740	26735	C	T	26735	29903	M	Y71Y	SNP_silent	Membrane	M:Y71Y	C26735T
EPI_ISL_437741	26735	C	T	26735	29903	M	Y71Y	SNP_silent	Membrane	M:Y71Y	C26735T
EPI_ISL_437742	26735	C	T	26735	29903	M	Y71Y	SNP_silent	Membrane	M:Y71Y	C26735T
EPI_ISL_437743	26735	C	T	26735	29903	M	Y71Y	SNP_silent	Membrane	M:Y71Y	C26735T
EPI_ISL_437744	26735	C	T	26735	29903	M	Y71Y	SNP_silent	Membrane	M:Y71Y	C26735T
EPI_ISL_437745	26735	C	T	26735	29903	M	Y71Y	SNP_silent	Membrane	M:Y71Y	C26735T
EPI_ISL_437748	26735	C	T	26735	29903	M	Y71Y	SNP_silent	Membrane	M:Y71Y	C26735T
EPI_ISL_437749	26735	C	T	26735	29903	M	Y71Y	SNP_silent	Membrane	M:Y71Y	C26735T
EPI_ISL_437750	26735	C	T	26735	29903	M	Y71Y	SNP_silent	Membrane	M:Y71Y	C26735T
EPI_ISL_437758	26735	C	T	26735	29903	M	Y71Y	SNP_silent	Membrane	M:Y71Y	C26735T
EPI_ISL_437933	26735	C	T	26735	29865	M	Y71Y	SNP_silent	Membrane	M:Y71Y	C26735T
EPI_ISL_438454	26735	C	T	26681	29812	M	Y71Y	SNP_silent	Membrane	M:Y71Y	C26735T
EPI_ISL_438566	26735	C	T	26735	29903	M	Y71Y	SNP_silent	Membrane	M:Y71Y	C26735T
EPI_ISL_438602	26735	C	T	26735	29903	M	Y71Y	SNP_silent	Membrane	M:Y71Y	C26735T
EPI_ISL_438693	26735	C	T	26735	29903	M	Y71Y	SNP_silent	Membrane	M:Y71Y	C26735T
EPI_ISL_438726	26735	C	T	26735	29903	M	Y71Y	SNP_silent	Membrane	M:Y71Y	C26735T
EPI_ISL_438735	26735	C	T	26735	29903	M	Y71Y	SNP_silent	Membrane	M:Y71Y	C26735T
EPI_ISL_438749	26735	C	T	26681	29782	M	Y71Y	SNP_silent	Membrane	M:Y71Y	C26735T
EPI_ISL_438887	26735	C	T	26681	29782	M	Y71Y	SNP_silent	Membrane	M:Y71Y	C26735T
EPI_ISL_440745	26735	C	T	26681	29782	M	Y71Y	SNP_silent	Membrane	M:Y71Y	C26735T
EPI_ISL_441258	26735	C	T	26681	29812	M	Y71Y	SNP_silent	Membrane	M:Y71Y	C26735T
EPI_ISL_441407	26735	C	T	26705	29831	M	Y71Y	SNP_silent	Membrane	M:Y71Y	C26735T
EPI_ISL_441584	26735	C	T	26681	29849	M	Y71Y	SNP_silent	Membrane	M:Y71Y	C26735T
EPI_ISL_441677	26735	C	T	26681	29849	M	Y71Y	SNP_silent	Membrane	M:Y71Y	C26735T
EPI_ISL_441738	26735	C	T	26681	29849	M	Y71Y	SNP_silent	Membrane	M:Y71Y	C26735T
EPI_ISL_442356	26735	C	T	26735	29903	M	Y71Y	SNP_silent	Membrane	M:Y71Y	C26735T
EPI_ISL_442501	26735	C	T	26735	29903	M	Y71Y	SNP_silent	Membrane	M:Y71Y	C26735T
EPI_ISL_443482	26735	C	T	26681	29782	M	Y71Y	SNP_silent	Membrane	M:Y71Y	C26735T
EPI_ISL_443551	26735	C	T	26681	29782	M	Y71Y	SNP_silent	Membrane	M:Y71Y	C26735T
EPI_ISL_443649	26735	C	T	26681	29816	M	Y71Y	SNP_silent	Membrane	M:Y71Y	C26735T
EPI_ISL_444456	26735	C	T	26735	29903	M	Y71Y	SNP_silent	Membrane	M:Y71Y	C26735T
EPI_ISL_444457	26735	C	T	26735	29903	M	Y71Y	SNP_silent	Membrane	M:Y71Y	C26735T
EPI_ISL_444459	26735	C	T	26735	29903	M	Y71Y	SNP_silent	Membrane	M:Y71Y	C26735T
EPI_ISL_444461	26735	C	T	26735	29903	M	Y71Y	SNP_silent	Membrane	M:Y71Y	C26735T
EPI_ISL_444464	26735	C	T	26735	29903	M	Y71Y	SNP_silent	Membrane	M:Y71Y	C26735T
EPI_ISL_444466	26735	C	T	26735	29903	M	Y71Y	SNP_silent	Membrane	M:Y71Y	C26735T
EPI_ISL_444467	26735	C	T	26735	29903	M	Y71Y	SNP_silent	Membrane	M:Y71Y	C26735T
EPI_ISL_444469	26735	C	T	26735	29903	M	Y71Y	SNP_silent	Membrane	M:Y71Y	C26735T
EPI_ISL_444470	26735	C	T	26735	29903	M	Y71Y	SNP_silent	Membrane	M:Y71Y	C26735T
EPI_ISL_444471	26735	C	T	26735	29903	M	Y71Y	SNP_silent	Membrane	M:Y71Y	C26735T
EPI_ISL_444472	26735	C	T	26735	29903	M	Y71Y	SNP_silent	Membrane	M:Y71Y	C26735T
EPI_ISL_444474	26735	C	T	26735	29903	M	Y71Y	SNP_silent	Membrane	M:Y71Y	C26735T
EPI_ISL_444476	26735	C	T	26735	29903	M	Y71Y	SNP_silent	Membrane	M:Y71Y	C26735T
EPI_ISL_444480	26735	C	T	26735	29903	M	Y71Y	SNP_silent	Membrane	M:Y71Y	C26735T
EPI_ISL_444482	26735	C	T	26735	29903	M	Y71Y	SNP_silent	Membrane	M:Y71Y	C26735T
EPI_ISL_444484	26735	C	T	26735	29903	M	Y71Y	SNP_silent	Membrane	M:Y71Y	C26735T
EPI_ISL_444485	26735	C	T	26735	29903	M	Y71Y	SNP_silent	Membrane	M:Y71Y	C26735T
EPI_ISL_444486	26735	C	T	26735	29903	M	Y71Y	SNP_silent	Membrane	M:Y71Y	C26735T
EPI_ISL_445235	26735	C	T	26735	29903	M	Y71Y	SNP_silent	Membrane	M:Y71Y	C26735T
EPI_ISL_447033	26735	C	T	26735	29903	M	Y71Y	SNP_silent	Membrane	M:Y71Y	C26735T
EPI_ISL_447034	26735	C	T	26735	29903	M	Y71Y	SNP_silent	Membrane	M:Y71Y	C26735T
EPI_ISL_447035	26735	C	T	26735	29903	M	Y71Y	SNP_silent	Membrane	M:Y71Y	C26735T
EPI_ISL_447036	26735	C	T	26729	29897	M	Y71Y	SNP_silent	Membrane	M:Y71Y	C26735T
EPI_ISL_447037	26735	C	T	26735	29903	M	Y71Y	SNP_silent	Membrane	M:Y71Y	C26735T
EPI_ISL_447039	26735	C	T	26735	29903	M	Y71Y	SNP_silent	Membrane	M:Y71Y	C26735T
EPI_ISL_447040	26735	C	T	26735	29903	M	Y71Y	SNP_silent	Membrane	M:Y71Y	C26735T
EPI_ISL_447041	26735	C	T	26735	29903	M	Y71Y	SNP_silent	Membrane	M:Y71Y	C26735T
EPI_ISL_447042	26735	C	T	26735	29903	M	Y71Y	SNP_silent	Membrane	M:Y71Y	C26735T
EPI_ISL_447043	26735	C	T	26735	29903	M	Y71Y	SNP_silent	Membrane	M:Y71Y	C26735T
EPI_ISL_447044	26735	C	T	26735	29903	M	Y71Y	SNP_silent	Membrane	M:Y71Y	C26735T
EPI_ISL_447045	26735	C	T	26735	29903	M	Y71Y	SNP_silent	Membrane	M:Y71Y	C26735T
EPI_ISL_447046	26735	C	T	26735	29903	M	Y71Y	SNP_silent	Membrane	M:Y71Y	C26735T
EPI_ISL_447048	26735	C	T	26735	29903	M	Y71Y	SNP_silent	Membrane	M:Y71Y	C26735T
EPI_ISL_447049	26735	C	T	26735	29903	M	Y71Y	SNP_silent	Membrane	M:Y71Y	C26735T
EPI_ISL_447050	26735	C	T	26735	29903	M	Y71Y	SNP_silent	Membrane	M:Y71Y	C26735T
EPI_ISL_447051	26735	C	T	26735	29903	M	Y71Y	SNP_silent	Membrane	M:Y71Y	C26735T
EPI_ISL_447053	26735	C	T	26735	29903	M	Y71Y	SNP_silent	Membrane	M:Y71Y	C26735T
EPI_ISL_447534	26735	C	T	26735	29903	M	Y71Y	SNP_silent	Membrane	M:Y71Y	C26735T
EPI_ISL_447535	26735	C	T	26735	29903	M	Y71Y	SNP_silent	Membrane	M:Y71Y	C26735T
EPI_ISL_447536	26735	C	T	26735	29903	M	Y71Y	SNP_silent	Membrane	M:Y71Y	C26735T
EPI_ISL_447537	26735	C	T	26735	29903	M	Y71Y	SNP_silent	Membrane	M:Y71Y	C26735T
EPI_ISL_447538	26735	C	T	26735	29903	M	Y71Y	SNP_silent	Membrane	M:Y71Y	C26735T
EPI_ISL_447539	26735	C	T	26735	29903	M	Y71Y	SNP_silent	Membrane	M:Y71Y	C26735T
EPI_ISL_447540	26735	C	T	26735	29903	M	Y71Y	SNP_silent	Membrane	M:Y71Y	C26735T
EPI_ISL_447541	26735	C	T	26735	29903	M	Y71Y	SNP_silent	Membrane	M:Y71Y	C26735T
EPI_ISL_447542	26735	C	T	26735	29903	M	Y71Y	SNP_silent	Membrane	M:Y71Y	C26735T
EPI_ISL_447543	26735	C	T	26735	29903	M	Y71Y	SNP_silent	Membrane	M:Y71Y	C26735T
EPI_ISL_447546	26735	C	T	26735	29903	M	Y71Y	SNP_silent	Membrane	M:Y71Y	C26735T
EPI_ISL_447548	26735	C	T	26735	29903	M	Y71Y	SNP_silent	Membrane	M:Y71Y	C26735T
EPI_ISL_447552	26735	C	T	26735	29903	M	Y71Y	SNP_silent	Membrane	M:Y71Y	C26735T
EPI_ISL_447553	26735	C	T	26735	29903	M	Y71Y	SNP_silent	Membrane	M:Y71Y	C26735T
EPI_ISL_447555	26735	C	T	26735	29903	M	Y71Y	SNP_silent	Membrane	M:Y71Y	C26735T
EPI_ISL_447926	26735	C	T	26735	29903	M	Y71Y	SNP_silent	Membrane	M:Y71Y	C26735T
EPI_ISL_447979	26735	C	T	26735	29903	M	Y71Y	SNP_silent	Membrane	M:Y71Y	C26735T
EPI_ISL_448084	26735	C	T	26735	29903	M	Y71Y	SNP_silent	Membrane	M:Y71Y	C26735T
EPI_ISL_448778	26735	C	T	26735	29903	M	Y71Y	SNP_silent	Membrane	M:Y71Y	C26735T
EPI_ISL_448786	26735	C	T	26735	29903	M	Y71Y	SNP_silent	Membrane	M:Y71Y	C26735T
EPI_ISL_448787	26735	C	T	26735	29903	M	Y71Y	SNP_silent	Membrane	M:Y71Y	C26735T
EPI_ISL_448900	26735	C	T	26735	29903	M	Y71Y	SNP_silent	Membrane	M:Y71Y	C26735T
EPI_ISL_450187	26735	C	T	26735	29903	M	Y71Y	SNP_silent	Membrane	M:Y71Y	C26735T
EPI_ISL_450343	26735	C	T	26727	29550	M	Y71Y	SNP_silent	Membrane	M:Y71Y	C26735T
EPI_ISL_450344	26735	C	T	26721	29532	M	Y71Y	SNP_silent	Membrane	M:Y71Y	C26735T
EPI_ISL_450782	26735	C	T	26735	29903	M	Y71Y	SNP_silent	Membrane	M:Y71Y	C26735T
EPI_ISL_450783	26735	C	T	26735	29903	M	Y71Y	SNP_silent	Membrane	M:Y71Y	C26735T
EPI_ISL_450789	26735	C	T	26735	29903	M	Y71Y	SNP_silent	Membrane	M:Y71Y	C26735T
EPI_ISL_451149	26735	C	T	26735	29903	M	Y71Y	SNP_silent	Membrane	M:Y71Y	C26735T
EPI_ISL_451151	26735	C	T	26735	29903	M	Y71Y	SNP_silent	Membrane	M:Y71Y	C26735T
EPI_ISL_451152	26735	C	T	26735	29903	M	Y71Y	SNP_silent	Membrane	M:Y71Y	C26735T
EPI_ISL_451153	26735	C	T	26735	29903	M	Y71Y	SNP_silent	Membrane	M:Y71Y	C26735T
EPI_ISL_451160	26735	C	T	26735	29903	M	Y71Y	SNP_silent	Membrane	M:Y71Y	C26735T
EPI_ISL_451162	26735	C	T	26735	29903	M	Y71Y	SNP_silent	Membrane	M:Y71Y	C26735T
EPI_ISL_452083	26735	C	T	26735	29903	M	Y71Y	SNP_silent	Membrane	M:Y71Y	C26735T
EPI_ISL_452938	26735	C	T	26735	29903	M	Y71Y	SNP_silent	Membrane	M:Y71Y	C26735T
EPI_ISL_452949	26735	C	T	26735	29903	M	Y71Y	SNP_silent	Membrane	M:Y71Y	C26735T
EPI_ISL_452973	26735	C	T	26735	29903	M	Y71Y	SNP_silent	Membrane	M:Y71Y	C26735T
EPI_ISL_453504	26735	C	T	26735	29903	M	Y71Y	SNP_silent	Membrane	M:Y71Y	C26735T
EPI_ISL_453511	26735	C	T	26735	29903	M	Y71Y	SNP_silent	Membrane	M:Y71Y	C26735T
EPI_ISL_453698	26735	C	T	26735	29903	M	Y71Y	SNP_silent	Membrane	M:Y71Y	C26735T
EPI_ISL_454502	26735	C	T	26735	29903	M	Y71Y	SNP_silent	Membrane	M:Y71Y	C26735T
EPI_ISL_454586	26735	C	T	26735	29903	M	Y71Y	SNP_silent	Membrane	M:Y71Y	C26735T
EPI_ISL_455017	26735	C	T	26735	29903	M	Y71Y	SNP_silent	Membrane	M:Y71Y	C26735T
EPI_ISL_455021	26735	C	T	26735	29903	M	Y71Y	SNP_silent	Membrane	M:Y71Y	C26735T
EPI_ISL_455023	26735	C	T	26735	29903	M	Y71Y	SNP_silent	Membrane	M:Y71Y	C26735T
EPI_ISL_455027	26735	C	T	26735	29903	M	Y71Y	SNP_silent	Membrane	M:Y71Y	C26735T
EPI_ISL_455302	26735	C	T	26681	29775	M	Y71Y	SNP_silent	Membrane	M:Y71Y	C26735T
EPI_ISL_455313	26735	C	T	26681	29782	M	Y71Y	SNP_silent	Membrane	M:Y71Y	C26735T
EPI_ISL_455474	26735	C	T	26735	29903	M	Y71Y	SNP_silent	Membrane	M:Y71Y	C26735T
EPI_ISL_455475	26735	C	T	26735	29903	M	Y71Y	SNP_silent	Membrane	M:Y71Y	C26735T
EPI_ISL_455478	26735	C	T	26735	29880	M	Y71Y	SNP_silent	Membrane	M:Y71Y	C26735T
EPI_ISL_455774	26735	C	T	26735	29367	M	Y71Y	SNP_silent	Membrane	M:Y71Y	C26735T
EPI_ISL_455775	26735	C	T	26735	29841	M	Y71Y	SNP_silent	Membrane	M:Y71Y	C26735T
EPI_ISL_455776	26735	C	T	26735	29689	M	Y71Y	SNP_silent	Membrane	M:Y71Y	C26735T
EPI_ISL_455777	26735	C	T	26735	29688	M	Y71Y	SNP_silent	Membrane	M:Y71Y	C26735T
EPI_ISL_455778	26735	C	T	26735	29862	M	Y71Y	SNP_silent	Membrane	M:Y71Y	C26735T
EPI_ISL_455779	26735	C	T	26735	29813	M	Y71Y	SNP_silent	Membrane	M:Y71Y	C26735T
EPI_ISL_455780	26735	C	T	26735	29824	M	Y71Y	SNP_silent	Membrane	M:Y71Y	C26735T
EPI_ISL_455782	26735	C	T	26735	29685	M	Y71Y	SNP_silent	Membrane	M:Y71Y	C26735T
EPI_ISL_455783	26735	C	T	26735	29689	M	Y71Y	SNP_silent	Membrane	M:Y71Y	C26735T
EPI_ISL_455784	26735	C	T	26735	29685	M	Y71Y	SNP_silent	Membrane	M:Y71Y	C26735T
EPI_ISL_456481	26735	C	T	26735	29903	M	Y71Y	SNP_silent	Membrane	M:Y71Y	C26735T
EPI_ISL_456484	26735	C	T	26735	29903	M	Y71Y	SNP_silent	Membrane	M:Y71Y	C26735T
EPI_ISL_456496	26735	C	T	26735	29903	M	Y71Y	SNP_silent	Membrane	M:Y71Y	C26735T
EPI_ISL_456499	26735	C	T	26735	29903	M	Y71Y	SNP_silent	Membrane	M:Y71Y	C26735T
EPI_ISL_456512	26735	C	T	26735	29903	M	Y71Y	SNP_silent	Membrane	M:Y71Y	C26735T
EPI_ISL_456513	26735	C	T	26735	29903	M	Y71Y	SNP_silent	Membrane	M:Y71Y	C26735T
EPI_ISL_456522	26735	C	T	26735	29903	M	Y71Y	SNP_silent	Membrane	M:Y71Y	C26735T
EPI_ISL_456551	26735	C	T	26735	29903	M	Y71Y	SNP_silent	Membrane	M:Y71Y	C26735T
EPI_ISL_456554	26735	C	T	26732	29900	M	Y71Y	SNP_silent	Membrane	M:Y71Y	C26735T
EPI_ISL_456564	26735	C	T	26735	29903	M	Y71Y	SNP_silent	Membrane	M:Y71Y	C26735T
EPI_ISL_456566	26735	C	T	26735	29903	M	Y71Y	SNP_silent	Membrane	M:Y71Y	C26735T
EPI_ISL_456634	26735	C	T	26735	29903	M	Y71Y	SNP_silent	Membrane	M:Y71Y	C26735T
EPI_ISL_456643	26735	C	T	26735	29903	M	Y71Y	SNP_silent	Membrane	M:Y71Y	C26735T
EPI_ISL_456703	26735	C	T	26735	29903	M	Y71Y	SNP_silent	Membrane	M:Y71Y	C26735T
EPI_ISL_456735	26735	C	T	26735	29903	M	Y71Y	SNP_silent	Membrane	M:Y71Y	C26735T
EPI_ISL_457010	26735	C	T	26735	29903	M	Y71Y	SNP_silent	Membrane	M:Y71Y	C26735T
EPI_ISL_457631	26735	C	T	26735	29903	M	Y71Y	SNP_silent	Membrane	M:Y71Y	C26735T
EPI_ISL_457723	26735	C	T	26725	29863	M	Y71Y	SNP_silent	Membrane	M:Y71Y	C26735T
EPI_ISL_458086	26735	C	T	26735	29903	M	Y71Y	SNP_silent	Membrane	M:Y71Y	C26735T
EPI_ISL_458087	26735	C	T	26735	29903	M	Y71Y	SNP_silent	Membrane	M:Y71Y	C26735T
EPI_ISL_458088	26735	C	T	26735	29903	M	Y71Y	SNP_silent	Membrane	M:Y71Y	C26735T
EPI_ISL_458089	26735	C	T	26735	29903	M	Y71Y	SNP_silent	Membrane	M:Y71Y	C26735T
EPI_ISL_458090	26735	C	T	26735	29903	M	Y71Y	SNP_silent	Membrane	M:Y71Y	C26735T
EPI_ISL_458092	26735	C	T	26735	29903	M	Y71Y	SNP_silent	Membrane	M:Y71Y	C26735T
EPI_ISL_458093	26735	C	T	26735	29903	M	Y71Y	SNP_silent	Membrane	M:Y71Y	C26735T
EPI_ISL_458094	26735	C	T	26735	29903	M	Y71Y	SNP_silent	Membrane	M:Y71Y	C26735T
EPI_ISL_458095	26735	C	T	26735	29903	M	Y71Y	SNP_silent	Membrane	M:Y71Y	C26735T
EPI_ISL_458097	26735	C	T	26735	29903	M	Y71Y	SNP_silent	Membrane	M:Y71Y	C26735T
EPI_ISL_458098	26735	C	T	26735	29903	M	Y71Y	SNP_silent	Membrane	M:Y71Y	C26735T
EPI_ISL_458099	26735	C	T	26735	29903	M	Y71Y	SNP_silent	Membrane	M:Y71Y	C26735T
EPI_ISL_458100	26735	C	T	26735	29903	M	Y71Y	SNP_silent	Membrane	M:Y71Y	C26735T
EPI_ISL_458102	26735	C	T	26735	29903	M	Y71Y	SNP_silent	Membrane	M:Y71Y	C26735T
EPI_ISL_458110	26735	C	T	26735	29903	M	Y71Y	SNP_silent	Membrane	M:Y71Y	C26735T
EPI_ISL_458112	26735	C	T	26735	29903	M	Y71Y	SNP_silent	Membrane	M:Y71Y	C26735T
EPI_ISL_458113	26735	C	T	26735	29903	M	Y71Y	SNP_silent	Membrane	M:Y71Y	C26735T
EPI_ISL_458618	26735	C	T	26681	29782	M	Y71Y	SNP_silent	Membrane	M:Y71Y	C26735T
EPI_ISL_458644	26735	C	T	26681	29782	M	Y71Y	SNP_silent	Membrane	M:Y71Y	C26735T
EPI_ISL_458891	26735	C	T	26681	29782	M	Y71Y	SNP_silent	Membrane	M:Y71Y	C26735T
EPI_ISL_459218	26735	C	T	26681	29782	M	Y71Y	SNP_silent	Membrane	M:Y71Y	C26735T
EPI_ISL_459240	26735	C	T	26681	29782	M	Y71Y	SNP_silent	Membrane	M:Y71Y	C26735T
EPI_ISL_459259	26735	C	T	26681	29783	M	Y71Y	SNP_silent	Membrane	M:Y71Y	C26735T
EPI_ISL_459306	26735	C	T	26681	29782	M	Y71Y	SNP_silent	Membrane	M:Y71Y	C26735T
EPI_ISL_459535	26735	C	T	26681	29782	M	Y71Y	SNP_silent	Membrane	M:Y71Y	C26735T
EPI_ISL_461190	26735	C	T	26681	29775	M	Y71Y	SNP_silent	Membrane	M:Y71Y	C26735T
EPI_ISL_461191	26735	C	T	26681	29775	M	Y71Y	SNP_silent	Membrane	M:Y71Y	C26735T
EPI_ISL_461192	26735	C	T	26681	29775	M	Y71Y	SNP_silent	Membrane	M:Y71Y	C26735T
EPI_ISL_461200	26735	C	T	26681	29775	M	Y71Y	SNP_silent	Membrane	M:Y71Y	C26735T
EPI_ISL_461202	26735	C	T	26681	29775	M	Y71Y	SNP_silent	Membrane	M:Y71Y	C26735T
EPI_ISL_461204	26735	C	T	26681	29775	M	Y71Y	SNP_silent	Membrane	M:Y71Y	C26735T
EPI_ISL_461213	26735	C	T	26681	29775	M	Y71Y	SNP_silent	Membrane	M:Y71Y	C26735T
EPI_ISL_461480	26735	C	T	26735	29903	M	Y71Y	SNP_silent	Membrane	M:Y71Y	C26735T
EPI_ISL_461484	26735	C	T	26735	29903	M	Y71Y	SNP_silent	Membrane	M:Y71Y	C26735T
EPI_ISL_461485	26735	C	T	26735	29903	M	Y71Y	SNP_silent	Membrane	M:Y71Y	C26735T
EPI_ISL_461488	26735	C	T	26735	29903	M	Y71Y	SNP_silent	Membrane	M:Y71Y	C26735T
EPI_ISL_461489	26735	C	T	26735	29903	M	Y71Y	SNP_silent	Membrane	M:Y71Y	C26735T
EPI_ISL_461491	26735	C	T	26735	29903	M	Y71Y	SNP_silent	Membrane	M:Y71Y	C26735T
EPI_ISL_461495	26735	C	T	26735	29903	M	Y71Y	SNP_silent	Membrane	M:Y71Y	C26735T
EPI_ISL_461499	26735	C	T	26735	29903	M	Y71Y	SNP_silent	Membrane	M:Y71Y	C26735T
EPI_ISL_461500	26735	C	T	26735	29903	M	Y71Y	SNP_silent	Membrane	M:Y71Y	C26735T
EPI_ISL_461553	26735	C	T	26735	29903	M	Y71Y	SNP_silent	Membrane	M:Y71Y	C26735T
EPI_ISL_461563	26735	C	T	26735	29903	M	Y71Y	SNP_silent	Membrane	M:Y71Y	C26735T
EPI_ISL_461579	26735	C	T	26735	29903	M	Y71Y	SNP_silent	Membrane	M:Y71Y	C26735T
EPI_ISL_461801	26735	C	T	26735	29903	M	Y71Y	SNP_silent	Membrane	M:Y71Y	C26735T
EPI_ISL_462043	26735	C	T	26735	29903	M	Y71Y	SNP_silent	Membrane	M:Y71Y	C26735T
EPI_ISL_463060	26735	C	T	26735	29729	M	Y71Y	SNP_silent	Membrane	M:Y71Y	C26735T
EPI_ISL_463062	26735	C	T	26735	29392	M	Y71Y	SNP_silent	Membrane	M:Y71Y	C26735T
EPI_ISL_465399	26735	C	T	26735	29903	M	Y71Y	SNP_silent	Membrane	M:Y71Y	C26735T
EPI_ISL_465443	26735	C	T	26735	29903	M	Y71Y	SNP_silent	Membrane	M:Y71Y	C26735T
EPI_ISL_465657	26735	C	T	26735	29903	M	Y71Y	SNP_silent	Membrane	M:Y71Y	C26735T
EPI_ISL_465663	26735	C	T	26735	29903	M	Y71Y	SNP_silent	Membrane	M:Y71Y	C26735T
EPI_ISL_465666	26735	C	T	26735	29903	M	Y71Y	SNP_silent	Membrane	M:Y71Y	C26735T
EPI_ISL_465667	26735	C	T	26735	29903	M	Y71Y	SNP_silent	Membrane	M:Y71Y	C26735T
EPI_ISL_465668	26735	C	T	26735	29903	M	Y71Y	SNP_silent	Membrane	M:Y71Y	C26735T
EPI_ISL_466637	26735	C	T	26735	29900	M	Y71Y	SNP_silent	Membrane	M:Y71Y	C26735T
EPI_ISL_466638	26735	C	T	26735	29903	M	Y71Y	SNP_silent	Membrane	M:Y71Y	C26735T
EPI_ISL_466639	26735	C	T	26735	29887	M	Y71Y	SNP_silent	Membrane	M:Y71Y	C26735T
EPI_ISL_466692	26735	C	T	26735	29971	M	Y71Y	SNP_silent	Membrane	M:Y71Y	C26735T
EPI_ISL_467033	26735	C	T	26735	29903	M	Y71Y	SNP_silent	Membrane	M:Y71Y	C26735T
EPI_ISL_467034	26735	C	T	26735	29903	M	Y71Y	SNP_silent	Membrane	M:Y71Y	C26735T
EPI_ISL_467041	26735	C	T	26735	29903	M	Y71Y	SNP_silent	Membrane	M:Y71Y	C26735T
EPI_ISL_467045	26735	C	T	26735	29903	M	Y71Y	SNP_silent	Membrane	M:Y71Y	C26735T
EPI_ISL_467049	26735	C	T	26735	29903	M	Y71Y	SNP_silent	Membrane	M:Y71Y	C26735T
EPI_ISL_467050	26735	C	T	26735	29903	M	Y71Y	SNP_silent	Membrane	M:Y71Y	C26735T
EPI_ISL_467051	26735	C	T	26735	29903	M	Y71Y	SNP_silent	Membrane	M:Y71Y	C26735T
EPI_ISL_467053	26735	C	T	26735	29903	M	Y71Y	SNP_silent	Membrane	M:Y71Y	C26735T
EPI_ISL_468055	26735	C	T	26710	29797	M	Y71Y	SNP_silent	Membrane	M:Y71Y	C26735T
EPI_ISL_468074	26735	C	T	26733	29901	M	Y71Y	SNP_silent	Membrane	M:Y71Y	C26735T
EPI_ISL_469024	26735	C	T	26735	29903	M	Y71Y	SNP_silent	Membrane	M:Y71Y	C26735T
EPI_ISL_469028	26735	C	T	26735	29903	M	Y71Y	SNP_silent	Membrane	M:Y71Y	C26735T
EPI_ISL_469029	26735	C	T	26735	29903	M	Y71Y	SNP_silent	Membrane	M:Y71Y	C26735T
EPI_ISL_469032	26735	C	T	26735	29903	M	Y71Y	SNP_silent	Membrane	M:Y71Y	C26735T
EPI_ISL_469033	26735	C	T	26735	29903	M	Y71Y	SNP_silent	Membrane	M:Y71Y	C26735T
EPI_ISL_469036	26735	C	T	26735	29903	M	Y71Y	SNP_silent	Membrane	M:Y71Y	C26735T
EPI_ISL_469038	26735	C	T	26735	29903	M	Y71Y	SNP_silent	Membrane	M:Y71Y	C26735T
EPI_ISL_469041	26735	C	T	26735	29903	M	Y71Y	SNP_silent	Membrane	M:Y71Y	C26735T
EPI_ISL_469044	26735	C	T	26735	29903	M	Y71Y	SNP_silent	Membrane	M:Y71Y	C26735T
EPI_ISL_469045	26735	C	T	26735	29903	M	Y71Y	SNP_silent	Membrane	M:Y71Y	C26735T
EPI_ISL_469046	26735	C	T	26735	29903	M	Y71Y	SNP_silent	Membrane	M:Y71Y	C26735T
EPI_ISL_469047	26735	C	T	26735	29903	M	Y71Y	SNP_silent	Membrane	M:Y71Y	C26735T
EPI_ISL_469241	26735	C	T	26711	29879	M	Y71Y	SNP_silent	Membrane	M:Y71Y	C26735T
EPI_ISL_469244	26735	C	T	26711	29814	M	Y71Y	SNP_silent	Membrane	M:Y71Y	C26735T
EPI_ISL_469249	26735	C	T	26711	29879	M	Y71Y	SNP_silent	Membrane	M:Y71Y	C26735T
EPI_ISL_469250	26735	C	T	26711	29814	M	Y71Y	SNP_silent	Membrane	M:Y71Y	C26735T
EPI_ISL_470098	26735	C	T	26681	29782	M	Y71Y	SNP_silent	Membrane	M:Y71Y	C26735T
EPI_ISL_470163	26735	C	T	26681	29782	M	Y71Y	SNP_silent	Membrane	M:Y71Y	C26735T
EPI_ISL_470181	26735	C	T	26681	29782	M	Y71Y	SNP_silent	Membrane	M:Y71Y	C26735T
EPI_ISL_470312	26735	C	T	26681	29782	M	Y71Y	SNP_silent	Membrane	M:Y71Y	C26735T
EPI_ISL_470313	26735	C	T	26681	29782	M	Y71Y	SNP_silent	Membrane	M:Y71Y	C26735T
EPI_ISL_470341	26735	C	T	26681	29782	M	Y71Y	SNP_silent	Membrane	M:Y71Y	C26735T
EPI_ISL_470520	26735	C	T	26681	29782	M	Y71Y	SNP_silent	Membrane	M:Y71Y	C26735T
EPI_ISL_471583	26735	C	T	26702	29833	M	Y71Y	SNP_silent	Membrane	M:Y71Y	C26735T
EPI_ISL_471590	26735	C	T	26702	29833	M	Y71Y	SNP_silent	Membrane	M:Y71Y	C26735T
EPI_ISL_471591	26735	C	T	26702	29833	M	Y71Y	SNP_silent	Membrane	M:Y71Y	C26735T
EPI_ISL_471592	26735	C	T	26702	29833	M	Y71Y	SNP_silent	Membrane	M:Y71Y	C26735T
EPI_ISL_471593	26735	C	T	26702	29833	M	Y71Y	SNP_silent	Membrane	M:Y71Y	C26735T
EPI_ISL_471594	26735	C	T	26702	29833	M	Y71Y	SNP_silent	Membrane	M:Y71Y	C26735T
EPI_ISL_471595	26735	C	T	26702	29833	M	Y71Y	SNP_silent	Membrane	M:Y71Y	C26735T
EPI_ISL_471596	26735	C	T	26702	29833	M	Y71Y	SNP_silent	Membrane	M:Y71Y	C26735T
EPI_ISL_471597	26735	C	T	26702	29833	M	Y71Y	SNP_silent	Membrane	M:Y71Y	C26735T
EPI_ISL_471598	26735	C	T	26702	29833	M	Y71Y	SNP_silent	Membrane	M:Y71Y	C26735T
EPI_ISL_471599	26735	C	T	26702	29833	M	Y71Y	SNP_silent	Membrane	M:Y71Y	C26735T
EPI_ISL_471600	26735	C	T	26702	29833	M	Y71Y	SNP_silent	Membrane	M:Y71Y	C26735T
EPI_ISL_471601	26735	C	T	26702	29833	M	Y71Y	SNP_silent	Membrane	M:Y71Y	C26735T
EPI_ISL_471602	26735	C	T	26702	29833	M	Y71Y	SNP_silent	Membrane	M:Y71Y	C26735T
EPI_ISL_471603	26735	C	T	26702	29833	M	Y71Y	SNP_silent	Membrane	M:Y71Y	C26735T
EPI_ISL_471604	26735	C	T	26702	29833	M	Y71Y	SNP_silent	Membrane	M:Y71Y	C26735T
EPI_ISL_471605	26735	C	T	26702	29833	M	Y71Y	SNP_silent	Membrane	M:Y71Y	C26735T
EPI_ISL_471606	26735	C	T	26702	29833	M	Y71Y	SNP_silent	Membrane	M:Y71Y	C26735T
EPI_ISL_471607	26735	C	T	26702	29833	M	Y71Y	SNP_silent	Membrane	M:Y71Y	C26735T
EPI_ISL_471608	26735	C	T	26702	29833	M	Y71Y	SNP_silent	Membrane	M:Y71Y	C26735T
EPI_ISL_471609	26735	C	T	26702	29833	M	Y71Y	SNP_silent	Membrane	M:Y71Y	C26735T
EPI_ISL_471610	26735	C	T	26702	29833	M	Y71Y	SNP_silent	Membrane	M:Y71Y	C26735T
EPI_ISL_471611	26735	C	T	26702	29833	M	Y71Y	SNP_silent	Membrane	M:Y71Y	C26735T
EPI_ISL_471612	26735	C	T	26702	29833	M	Y71Y	SNP_silent	Membrane	M:Y71Y	C26735T
EPI_ISL_471613	26735	C	T	26702	29833	M	Y71Y	SNP_silent	Membrane	M:Y71Y	C26735T
EPI_ISL_471614	26735	C	T	26702	29833	M	Y71Y	SNP_silent	Membrane	M:Y71Y	C26735T
EPI_ISL_471615	26735	C	T	26702	29833	M	Y71Y	SNP_silent	Membrane	M:Y71Y	C26735T
EPI_ISL_471616	26735	C	T	26702	29833	M	Y71Y	SNP_silent	Membrane	M:Y71Y	C26735T
EPI_ISL_473455	26735	C	T	26735	29903	M	Y71Y	SNP_silent	Membrane	M:Y71Y	C26735T
EPI_ISL_473542	26735	C	T	26735	29903	M	Y71Y	SNP_silent	Membrane	M:Y71Y	C26735T
EPI_ISL_474462	26735	C	T	26697	29865	M	Y71Y	SNP_silent	Membrane	M:Y71Y	C26735T
EPI_ISL_439658	26735	C	T	26678	29776	M	Y71Y	SNP_silent	Membrane	M:Y71Y	C26735T
EPI_ISL_425968	26735	C	T	26735	29903	M	Y71Y	SNP_silent	Membrane	M:Y71Y	C26735T
EPI_ISL_428723	26735	C	T	26470	29638	M	Y71Y	SNP_silent	Membrane	M:Y71Y	C26735T
EPI_ISL_429863	26735	C	T	26470	29638	M	Y71Y	SNP_silent	Membrane	M:Y71Y	C26735T
EPI_ISL_425857	26735	C	T	26735	29903	M	Y71Y	SNP_silent	Membrane	M:Y71Y	C26735T
EPI_ISL_425892	26735	C	T	26735	29903	M	Y71Y	SNP_silent	Membrane	M:Y71Y	C26735T
EPI_ISL_425949	26735	C	T	26735	29903	M	Y71Y	SNP_silent	Membrane	M:Y71Y	C26735T
EPI_ISL_426014	26735	C	T	26735	29903	M	Y71Y	SNP_silent	Membrane	M:Y71Y	C26735T
EPI_ISL_433212	26735	C	T	26735	29903	M	Y71Y	SNP_silent	Membrane	M:Y71Y	C26735T
EPI_ISL_417303	26735	C	T	26735	29903	M	Y71Y	SNP_silent	Membrane	M:Y71Y	C26735T
EPI_ISL_433299	26735	C	T	26735	29903	M	Y71Y	SNP_silent	Membrane	M:Y71Y	C26735T
EPI_ISL_440330	26735	C	T	26681	29849	M	Y71Y	SNP_silent	Membrane	M:Y71Y	C26735T
EPI_ISL_440360	26735	C	T	26681	29782	M	Y71Y	SNP_silent	Membrane	M:Y71Y	C26735T
EPI_ISL_440611	26735	C	T	26681	29782	M	Y71Y	SNP_silent	Membrane	M:Y71Y	C26735T
EPI_ISL_441541	26735	C	T	26735	29903	M	Y71Y	SNP_silent	Membrane	M:Y71Y	C26735T
EPI_ISL_441786	26735	C	T	26733	29901	M	Y71Y	SNP_silent	Membrane	M:Y71Y	C26735T
[truncated: 2,083 more rows]
