# Supplementary material for: Rational Primer and Probe Construction in PCR-Based Assays for the Efficient Diagnosis of Drifting Variants of SARS-CoV-2
Source: Adv Virol. 2022 May 13;2022:2965666. doi: 10.1155/2022/2965666 (PMC9122727; doi:10.1155/2022/2965666)
Supplement: Supplementary Materials — Supplementary 1: Multiple sequence alignment (MUSCLE) data/diagram of the entire N gene among analyzed 8 coronavirus sequences (NCBI GenBank IDs) by MEGA11 version 0.1 and is presented. Supplementary 2:: Original raw file downloaded from [15]. It contains all the records of mutations in SARS-CoV-2 genomes studied. Supplementary 3, 4, 5, 6, and 7: spreadsheet files for mutation analyses for NSP12ab, S, E, M, and N genes of SARS-CoV-2 genome, respectively, and are available on request. [file 2965666.f1.zip › 2965666.f1/Supplementery 7 (1).txt]

sample	refpos	refvar	qvar	qpos	qlength	protein	variant	varclass	annotation	varname	varclade
EPI_ISL_473388	28278	C	A	28278	29903	N	S2Y	SNP	Nucleocapsid protein	N:S2Y	C28278A
EPI_ISL_473437	28278	C	A	28278	29903	N	S2Y	SNP	Nucleocapsid protein	N:S2Y	C28278A
EPI_ISL_424645	28280	G	A	28280	29903	N	D3N	SNP	Nucleocapsid protein	N:D3N	G28280A
EPI_ISL_435477	28280	GAT	CTA	28280	29903	N	D3L	SNP	Nucleocapsid protein	N:D3L	GAT28280CTA
EPI_ISL_439399	28280	GAT	CTA	28226	29782	N	D3L	SNP	Nucleocapsid protein	N:D3L	GAT28280CTA
EPI_ISL_439997	28280	GAT	CTA	28226	29783	N	D3L	SNP	Nucleocapsid protein	N:D3L	GAT28280CTA
EPI_ISL_440111	28280	GAT	CTA	28226	29782	N	D3L	SNP	Nucleocapsid protein	N:D3L	GAT28280CTA
EPI_ISL_440556	28280	GAT	CTA	28226	29782	N	D3L	SNP	Nucleocapsid protein	N:D3L	GAT28280CTA
EPI_ISL_441572	28280	GAT	CTA	28226	29849	N	D3L	SNP	Nucleocapsid protein	N:D3L	GAT28280CTA
EPI_ISL_442106	28280	GAT	CTA	28226	29849	N	D3L	SNP	Nucleocapsid protein	N:D3L	GAT28280CTA
EPI_ISL_442232	28280	GAT	CTA	28226	29811	N	D3L	SNP	Nucleocapsid protein	N:D3L	GAT28280CTA
EPI_ISL_442541	28280	GAT	CTA	28226	29849	N	D3L	SNP	Nucleocapsid protein	N:D3L	GAT28280CTA
EPI_ISL_442957	28280	GAT	CTA	28226	29812	N	D3L	SNP	Nucleocapsid protein	N:D3L	GAT28280CTA
EPI_ISL_442974	28280	GAT	CTA	28226	29782	N	D3L	SNP	Nucleocapsid protein	N:D3L	GAT28280CTA
EPI_ISL_443016	28280	GAT	CTA	28226	29849	N	D3L	SNP	Nucleocapsid protein	N:D3L	GAT28280CTA
EPI_ISL_443084	28280	GAT	CTA	28226	29782	N	D3L	SNP	Nucleocapsid protein	N:D3L	GAT28280CTA
EPI_ISL_443384	28280	GAT	CTA	28226	29782	N	D3L	SNP	Nucleocapsid protein	N:D3L	GAT28280CTA
EPI_ISL_443461	28280	GAT	CTA	28276	29885	N	D3L	SNP	Nucleocapsid protein	N:D3L	GAT28280CTA
EPI_ISL_443467	28280	GAT	CTA	28226	29782	N	D3L	SNP	Nucleocapsid protein	N:D3L	GAT28280CTA
EPI_ISL_470445	28280	GAT	CTA	28226	29782	N	D3L	SNP	Nucleocapsid protein	N:D3L	GAT28280CTA
EPI_ISL_418030	28280	G	T	28248	29864	N	D3Y	SNP	Nucleocapsid protein	N:D3Y	G28280T
EPI_ISL_463893	28281	A	G	28220	29793	N	D3G	SNP	Nucleocapsid protein	N:D3G	A28281G
EPI_ISL_418062	28283	A	G	28277	29894	N	N4D	SNP	Nucleocapsid protein	N:N4D	A28283G
EPI_ISL_441677	28287	G	T	28233	29849	N	G5V	SNP	Nucleocapsid protein	N:G5V	G28287T
EPI_ISL_441902	28287	G	A	28287	29903	N	G5E	SNP	Nucleocapsid protein	N:G5E	G28287A
EPI_ISL_462066	28287	G	A	28287	29903	N	G5E	SNP	Nucleocapsid protein	N:G5E	G28287A
EPI_ISL_425219	28287	G	T	28233	29782	N	G5V	SNP	Nucleocapsid protein	N:G5V	G28287T
EPI_ISL_447252	28288	A	G	28291	29939	N	G5G	SNP_silent	Nucleocapsid protein	N:G5G	A28288G
EPI_ISL_422983	28289	C	A	28258	29868	N	P6T	SNP	Nucleocapsid protein	N:P6T	C28289A
EPI_ISL_442605	28289	C	A	28235	29849	N	P6T	SNP	Nucleocapsid protein	N:P6T	C28289A
EPI_ISL_443234	28289	C	T	28289	29891	N	P6S	SNP	Nucleocapsid protein	N:P6S	C28289T
EPI_ISL_445243	28289	C	T	28289	29903	N	P6S	SNP	Nucleocapsid protein	N:P6S	C28289T
EPI_ISL_447054	28289	C	T	28289	29903	N	P6S	SNP	Nucleocapsid protein	N:P6S	C28289T
EPI_ISL_458110	28289	C	A	28289	29903	N	P6T	SNP	Nucleocapsid protein	N:P6T	C28289A
EPI_ISL_465980	28289	C	A	28289	29903	N	P6T	SNP	Nucleocapsid protein	N:P6T	C28289A
EPI_ISL_465981	28289	C	A	28289	29903	N	P6T	SNP	Nucleocapsid protein	N:P6T	C28289A
EPI_ISL_466396	28289	C	A	28289	29903	N	P6T	SNP	Nucleocapsid protein	N:P6T	C28289A
EPI_ISL_470092	28289	C	A	28235	29782	N	P6T	SNP	Nucleocapsid protein	N:P6T	C28289A
EPI_ISL_470115	28289	C	A	28235	29782	N	P6T	SNP	Nucleocapsid protein	N:P6T	C28289A
EPI_ISL_451666	28289	C	A	28285	29899	N	P6T	SNP	Nucleocapsid protein	N:P6T	C28289A
EPI_ISL_429761	28289	C	T	28289	29873	N	P6S	SNP	Nucleocapsid protein	N:P6S	C28289T
EPI_ISL_472066	28290	C	T	28279	29892	N	P6L	SNP	Nucleocapsid protein	N:P6L	C28290T
EPI_ISL_420395	28290	C	T	28236	29782	N	P6L	SNP	Nucleocapsid protein	N:P6L	C28290T
EPI_ISL_438840	28290	C	T	28236	29782	N	P6L	SNP	Nucleocapsid protein	N:P6L	C28290T
EPI_ISL_443452	28290	C	T	28236	29812	N	P6L	SNP	Nucleocapsid protein	N:P6L	C28290T
EPI_ISL_449251	28290	C	T	28236	29782	N	P6L	SNP	Nucleocapsid protein	N:P6L	C28290T
EPI_ISL_451174	28290	C	T	28290	29903	N	P6L	SNP	Nucleocapsid protein	N:P6L	C28290T
EPI_ISL_457723	28290	C	T	28280	29863	N	P6L	SNP	Nucleocapsid protein	N:P6L	C28290T
EPI_ISL_459361	28290	C	T	28236	29782	N	P6L	SNP	Nucleocapsid protein	N:P6L	C28290T
EPI_ISL_468743	28290	C	T	28290	29903	N	P6L	SNP	Nucleocapsid protein	N:P6L	C28290T
EPI_ISL_472018	28290	C	T	28290	29903	N	P6L	SNP	Nucleocapsid protein	N:P6L	C28290T
EPI_ISL_472021	28290	C	T	28290	29903	N	P6L	SNP	Nucleocapsid protein	N:P6L	C28290T
EPI_ISL_472027	28290	C	T	28281	29894	N	P6L	SNP	Nucleocapsid protein	N:P6L	C28290T
EPI_ISL_472031	28290	C	T	28282	29858	N	P6L	SNP	Nucleocapsid protein	N:P6L	C28290T
EPI_ISL_472033	28290	C	T	28261	29872	N	P6L	SNP	Nucleocapsid protein	N:P6L	C28290T
EPI_ISL_472044	28290	C	T	28288	29901	N	P6L	SNP	Nucleocapsid protein	N:P6L	C28290T
EPI_ISL_472055	28290	C	T	28260	29864	N	P6L	SNP	Nucleocapsid protein	N:P6L	C28290T
EPI_ISL_472057	28290	C	T	28260	29836	N	P6L	SNP	Nucleocapsid protein	N:P6L	C28290T
EPI_ISL_472060	28290	C	T	28281	29857	N	P6L	SNP	Nucleocapsid protein	N:P6L	C28290T
EPI_ISL_472073	28290	C	T	28261	29874	N	P6L	SNP	Nucleocapsid protein	N:P6L	C28290T
EPI_ISL_472078	28290	C	T	28261	29874	N	P6L	SNP	Nucleocapsid protein	N:P6L	C28290T
EPI_ISL_472081	28290	C	T	28260	29836	N	P6L	SNP	Nucleocapsid protein	N:P6L	C28290T
EPI_ISL_472085	28290	C	T	28261	29874	N	P6L	SNP	Nucleocapsid protein	N:P6L	C28290T
EPI_ISL_472088	28290	C	T	28284	29885	N	P6L	SNP	Nucleocapsid protein	N:P6L	C28290T
EPI_ISL_472106	28290	C	T	28290	29903	N	P6L	SNP	Nucleocapsid protein	N:P6L	C28290T
EPI_ISL_472122	28290	C	T	28290	29903	N	P6L	SNP	Nucleocapsid protein	N:P6L	C28290T
EPI_ISL_472130	28290	C	T	28262	29875	N	P6L	SNP	Nucleocapsid protein	N:P6L	C28290T
EPI_ISL_472131	28290	C	T	28261	29874	N	P6L	SNP	Nucleocapsid protein	N:P6L	C28290T
EPI_ISL_432373	28291	C	T	28289	29901	N	P6P	SNP_silent	Nucleocapsid protein	N:P6P	C28291T
EPI_ISL_446746	28291	C	T	28290	29902	N	P6P	SNP_silent	Nucleocapsid protein	N:P6P	C28291T
EPI_ISL_446882	28291	C	T	28253	29865	N	P6P	SNP_silent	Nucleocapsid protein	N:P6P	C28291T
EPI_ISL_452267	28291	C	T	28291	29903	N	P6P	SNP_silent	Nucleocapsid protein	N:P6P	C28291T
EPI_ISL_472866	28291	C	T	28260	29872	N	P6P	SNP_silent	Nucleocapsid protein	N:P6P	C28291T
EPI_ISL_473842	28291	C	T	28291	29903	N	P6P	SNP_silent	Nucleocapsid protein	N:P6P	C28291T
EPI_ISL_474586	28291	C	T	28253	29865	N	P6P	SNP_silent	Nucleocapsid protein	N:P6P	C28291T
EPI_ISL_474769	28291	C	T	28254	29866	N	P6P	SNP_silent	Nucleocapsid protein	N:P6P	C28291T
EPI_ISL_467143	28291	C	T	28291	29903	N	P6P	SNP_silent	Nucleocapsid protein	N:P6P	C28291T
EPI_ISL_406534	28291	C	T	28268	29839	N	P6P	SNP_silent	Nucleocapsid protein	N:P6P	C28291T
EPI_ISL_445344	28292	C	A	28283	29829	N	Q7K	SNP	Nucleocapsid protein	N:Q7K	C28292A
EPI_ISL_453823	28292	C	A	28252	29763	N	Q7K	SNP	Nucleocapsid protein	N:Q7K	C28292A
EPI_ISL_472991	28292	C	A	28281	29892	N	Q7K	SNP	Nucleocapsid protein	N:Q7K	C28292A
EPI_ISL_448551	28292	C	A	28292	29903	N	Q7K	SNP	Nucleocapsid protein	N:Q7K	C28292A
EPI_ISL_452731	28292	C	A	28292	29903	N	Q7K	SNP	Nucleocapsid protein	N:Q7K	C28292A
EPI_ISL_467140	28292	C	A	28292	29903	N	Q7K	SNP	Nucleocapsid protein	N:Q7K	C28292A
EPI_ISL_446033	28293	A	G	28292	29902	N	Q7R	SNP	Nucleocapsid protein	N:Q7R	A28293G
EPI_ISL_446132	28293	A	G	28291	29901	N	Q7R	SNP	Nucleocapsid protein	N:Q7R	A28293G
EPI_ISL_446661	28293	A	G	28283	29893	N	Q7R	SNP	Nucleocapsid protein	N:Q7R	A28293G
EPI_ISL_455108	28294	A	C	28294	29903	N	Q7H	SNP	Nucleocapsid protein	N:Q7H	A28294C
EPI_ISL_472922	28294	A	C	28264	29873	N	Q7H	SNP	Nucleocapsid protein	N:Q7H	A28294C
EPI_ISL_473079	28294	A	C	28294	29903	N	Q7H	SNP	Nucleocapsid protein	N:Q7H	A28294C
EPI_ISL_473171	28294	A	C	28290	29899	N	Q7H	SNP	Nucleocapsid protein	N:Q7H	A28294C
EPI_ISL_473206	28294	A	C	28290	29899	N	Q7H	SNP	Nucleocapsid protein	N:Q7H	A28294C
EPI_ISL_473247	28294	A	C	28277	29886	N	Q7H	SNP	Nucleocapsid protein	N:Q7H	A28294C
EPI_ISL_473259	28294	A	C	28294	29903	N	Q7H	SNP	Nucleocapsid protein	N:Q7H	A28294C
EPI_ISL_447622	28297	T	C	28297	29870	N	N8N	SNP_silent	Nucleocapsid protein	N:N8N	T28297C
EPI_ISL_452178	28297	T	C	28296	29900	N	N8N	SNP_silent	Nucleocapsid protein	N:N8N	T28297C
EPI_ISL_452179	28297	T	C	28290	29895	N	N8N	SNP_silent	Nucleocapsid protein	N:N8N	T28297C
EPI_ISL_418209	28297	T	C	28297	29903	N	N8N	SNP_silent	Nucleocapsid protein	N:N8N	T28297C
EPI_ISL_443384	28297	T	C	28243	29782	N	N8N	SNP_silent	Nucleocapsid protein	N:N8N	T28297C
EPI_ISL_465527	28297	T	C	28297	29903	N	N8N	SNP_silent	Nucleocapsid protein	N:N8N	T28297C
EPI_ISL_447381	28300	G	T	28301	29892	N	Q9H	SNP	Nucleocapsid protein	N:Q9H	G28300T
EPI_ISL_465570	28300	G	T	28300	29903	N	Q9H	SNP	Nucleocapsid protein	N:Q9H	G28300T
EPI_ISL_415532	28300	G	T	28257	29786	N	Q9H	SNP	Nucleocapsid protein	N:Q9H	G28300T
EPI_ISL_426461	28300	G	T	28294	29856	N	Q9H	SNP	Nucleocapsid protein	N:Q9H	G28300T
EPI_ISL_429802	28300	G	T	28300	29883	N	Q9H	SNP	Nucleocapsid protein	N:Q9H	G28300T
EPI_ISL_432037	28300	G	T	28262	29865	N	Q9H	SNP	Nucleocapsid protein	N:Q9H	G28300T
EPI_ISL_432187	28300	G	T	28300	29903	N	Q9H	SNP	Nucleocapsid protein	N:Q9H	G28300T
EPI_ISL_445622	28300	G	T	28288	29891	N	Q9H	SNP	Nucleocapsid protein	N:Q9H	G28300T
EPI_ISL_446396	28300	G	T	28299	29902	N	Q9H	SNP	Nucleocapsid protein	N:Q9H	G28300T
EPI_ISL_446811	28300	G	T	28300	29903	N	Q9H	SNP	Nucleocapsid protein	N:Q9H	G28300T
EPI_ISL_454357	28300	G	T	28300	29840	N	Q9H	SNP	Nucleocapsid protein	N:Q9H	G28300T
EPI_ISL_455566	28300	G	T	28300	29884	N	Q9H	SNP	Nucleocapsid protein	N:Q9H	G28300T
EPI_ISL_459248	28300	G	T	28246	29782	N	Q9H	SNP	Nucleocapsid protein	N:Q9H	G28300T
EPI_ISL_459252	28300	G	T	28246	29783	N	Q9H	SNP	Nucleocapsid protein	N:Q9H	G28300T
EPI_ISL_459265	28300	G	T	28246	29782	N	Q9H	SNP	Nucleocapsid protein	N:Q9H	G28300T
EPI_ISL_459285	28300	G	T	28246	29782	N	Q9H	SNP	Nucleocapsid protein	N:Q9H	G28300T
EPI_ISL_459314	28300	G	T	28246	29782	N	Q9H	SNP	Nucleocapsid protein	N:Q9H	G28300T
EPI_ISL_459322	28300	G	T	28246	29782	N	Q9H	SNP	Nucleocapsid protein	N:Q9H	G28300T
EPI_ISL_461557	28300	G	T	28300	29903	N	Q9H	SNP	Nucleocapsid protein	N:Q9H	G28300T
EPI_ISL_461559	28300	G	T	28300	29903	N	Q9H	SNP	Nucleocapsid protein	N:Q9H	G28300T
EPI_ISL_464152	28300	G	T	28300	29903	N	Q9H	SNP	Nucleocapsid protein	N:Q9H	G28300T
EPI_ISL_464155	28300	G	T	28300	29903	N	Q9H	SNP	Nucleocapsid protein	N:Q9H	G28300T
EPI_ISL_465566	28300	G	T	28300	29903	N	Q9H	SNP	Nucleocapsid protein	N:Q9H	G28300T
EPI_ISL_465569	28300	G	T	28300	29903	N	Q9H	SNP	Nucleocapsid protein	N:Q9H	G28300T
EPI_ISL_465571	28300	G	T	28300	29903	N	Q9H	SNP	Nucleocapsid protein	N:Q9H	G28300T
EPI_ISL_474306	28300	G	T	28300	29903	N	Q9H	SNP	Nucleocapsid protein	N:Q9H	G28300T
EPI_ISL_474384	28300	G	T	28270	29873	N	Q9H	SNP	Nucleocapsid protein	N:Q9H	G28300T
EPI_ISL_474409	28300	G	T	28258	29861	N	Q9H	SNP	Nucleocapsid protein	N:Q9H	G28300T
EPI_ISL_474489	28300	G	T	28262	29865	N	Q9H	SNP	Nucleocapsid protein	N:Q9H	G28300T
EPI_ISL_474747	28300	G	T	28272	29875	N	Q9H	SNP	Nucleocapsid protein	N:Q9H	G28300T
EPI_ISL_416650	28300	G	T	28250	29867	N	Q9H	SNP	Nucleocapsid protein	N:Q9H	G28300T
EPI_ISL_453328	28300	G	T	28289	29892	N	Q9H	SNP	Nucleocapsid protein	N:Q9H	G28300T
EPI_ISL_466074	28300	G	T	28300	29903	N	Q9H	SNP	Nucleocapsid protein	N:Q9H	G28300T
EPI_ISL_466075	28300	G	T	28300	29903	N	Q9H	SNP	Nucleocapsid protein	N:Q9H	G28300T
EPI_ISL_464024	28302	G	C	28302	29903	N	R10P	SNP	Nucleocapsid protein	N:R10P	G28302C
EPI_ISL_471414	28302	G	C	28264	29800	N	R10P	SNP	Nucleocapsid protein	N:R10P	G28302C
EPI_ISL_474152	28302	G	C	28298	29899	N	R10P	SNP	Nucleocapsid protein	N:R10P	G28302C
EPI_ISL_471853	28303	A	T	28303	29903	N	R10R	SNP_silent	Nucleocapsid protein	N:R10R	A28303T
EPI_ISL_452336	28305	A	C	28305	29903	N	N11T	SNP	Nucleocapsid protein	N:N11T	A28305C
EPI_ISL_422748	28305	A	G	28251	29775	N	N11S	SNP	Nucleocapsid protein	N:N11S	A28305G
EPI_ISL_454787	28305	A	G	28299	29891	N	N11S	SNP	Nucleocapsid protein	N:N11S	A28305G
EPI_ISL_455161	28305	A	G	28251	29775	N	N11S	SNP	Nucleocapsid protein	N:N11S	A28305G
EPI_ISL_455305	28305	A	G	28251	29775	N	N11S	SNP	Nucleocapsid protein	N:N11S	A28305G
EPI_ISL_461270	28305	A	G	28251	29775	N	N11S	SNP	Nucleocapsid protein	N:N11S	A28305G
EPI_ISL_421261	28305	A	C	28281	29867	N	N11T	SNP	Nucleocapsid protein	N:N11T	A28305C
EPI_ISL_421262	28305	A	C	28281	29867	N	N11T	SNP	Nucleocapsid protein	N:N11T	A28305C
EPI_ISL_452364	28305	A	C	28305	29903	N	N11T	SNP	Nucleocapsid protein	N:N11T	A28305C
EPI_ISL_452357	28305	A	C	28305	29903	N	N11T	SNP	Nucleocapsid protein	N:N11T	A28305C
EPI_ISL_428792	28307	G	T	28307	29903	N	A12S	SNP	Nucleocapsid protein	N:A12S	G28307T
EPI_ISL_433796	28307	G	A	28307	29903	N	A12T	SNP	Nucleocapsid protein	N:A12T	G28307A
EPI_ISL_457884	28307	G	T	28253	29782	N	A12S	SNP	Nucleocapsid protein	N:A12S	G28307T
EPI_ISL_473510	28307	G	A	28307	29903	N	A12T	SNP	Nucleocapsid protein	N:A12T	G28307A
EPI_ISL_418429	28308	C	T	28310	29879	N	A12V	SNP	Nucleocapsid protein	N:A12V	C28308T
EPI_ISL_433483	28308	C	T	28308	29903	N	A12V	SNP	Nucleocapsid protein	N:A12V	C28308T
EPI_ISL_470737	28308	C	T	28277	29872	N	A12V	SNP	Nucleocapsid protein	N:A12V	C28308T
EPI_ISL_453518	28310	C	T	28310	29903	N	P13S	SNP	Nucleocapsid protein	N:P13S	C28310T
EPI_ISL_417991	28310	C	T	28270	29763	N	P13S	SNP	Nucleocapsid protein	N:P13S	C28310T
EPI_ISL_420250	28310	C	T	28310	29903	N	P13S	SNP	Nucleocapsid protein	N:P13S	C28310T
EPI_ISL_425628	28310	C	A	28310	29903	N	P13T	SNP	Nucleocapsid protein	N:P13T	C28310A
EPI_ISL_425804	28310	C	T	28256	29812	N	P13S	SNP	Nucleocapsid protein	N:P13S	C28310T
EPI_ISL_432536	28310	C	A	28310	29903	N	P13T	SNP	Nucleocapsid protein	N:P13T	C28310A
EPI_ISL_452239	28310	C	T	28310	29903	N	P13S	SNP	Nucleocapsid protein	N:P13S	C28310T
EPI_ISL_453919	28310	C	T	28160	29588	N	P13S	SNP	Nucleocapsid protein	N:P13S	C28310T
EPI_ISL_456925	28310	C	T	28310	29903	N	P13S	SNP	Nucleocapsid protein	N:P13S	C28310T
EPI_ISL_436612	28310	C	A	28256	29782	N	P13T	SNP	Nucleocapsid protein	N:P13T	C28310A
EPI_ISL_428279	28310	C	A	28256	29782	N	P13T	SNP	Nucleocapsid protein	N:P13T	C28310A
EPI_ISL_450332	28311	C	T	28304	29852	N	P13L	SNP	Nucleocapsid protein	N:P13L	C28311T
EPI_ISL_436435	28311	C	T	28311	29866	N	P13L	SNP	Nucleocapsid protein	N:P13L	C28311T
EPI_ISL_470878	28311	C	T	28311	29903	N	P13L	SNP	Nucleocapsid protein	N:P13L	C28311T
EPI_ISL_430956	28311	C	T	28279	29830	N	P13L	SNP	Nucleocapsid protein	N:P13L	C28311T
EPI_ISL_462411	28311	C	T	28311	29891	N	P13L	SNP	Nucleocapsid protein	N:P13L	C28311T
EPI_ISL_447573	28311	C	T	28276	29868	N	P13L	SNP	Nucleocapsid protein	N:P13L	C28311T
EPI_ISL_447579	28311	C	T	28275	29867	N	P13L	SNP	Nucleocapsid protein	N:P13L	C28311T
EPI_ISL_462379	28311	C	T	28311	29891	N	P13L	SNP	Nucleocapsid protein	N:P13L	C28311T
EPI_ISL_434952	28311	C	T	28311	29903	N	P13L	SNP	Nucleocapsid protein	N:P13L	C28311T
EPI_ISL_443237	28311	C	T	28311	29891	N	P13L	SNP	Nucleocapsid protein	N:P13L	C28311T
EPI_ISL_467827	28311	C	T	28257	29782	N	P13L	SNP	Nucleocapsid protein	N:P13L	C28311T
EPI_ISL_417920	28311	C	T	28311	29903	N	P13L	SNP	Nucleocapsid protein	N:P13L	C28311T
EPI_ISL_427809	28311	C	T	28295	29871	N	P13L	SNP	Nucleocapsid protein	N:P13L	C28311T
EPI_ISL_442094	28311	C	T	28257	29812	N	P13L	SNP	Nucleocapsid protein	N:P13L	C28311T
EPI_ISL_469108	28311	C	T	28311	29891	N	P13L	SNP	Nucleocapsid protein	N:P13L	C28311T
EPI_ISL_469102	28311	C	T	28311	29891	N	P13L	SNP	Nucleocapsid protein	N:P13L	C28311T
EPI_ISL_469115	28311	C	T	28311	29891	N	P13L	SNP	Nucleocapsid protein	N:P13L	C28311T
EPI_ISL_469116	28311	C	T	28311	29891	N	P13L	SNP	Nucleocapsid protein	N:P13L	C28311T
EPI_ISL_436450	28311	C	T	28311	29889	N	P13L	SNP	Nucleocapsid protein	N:P13L	C28311T
EPI_ISL_447622	28311	C	T	28311	29870	N	P13L	SNP	Nucleocapsid protein	N:P13L	C28311T
EPI_ISL_452178	28311	C	T	28310	29900	N	P13L	SNP	Nucleocapsid protein	N:P13L	C28311T
EPI_ISL_452179	28311	C	T	28304	29895	N	P13L	SNP	Nucleocapsid protein	N:P13L	C28311T
EPI_ISL_468033	28311	C	T	28310	29902	N	P13L	SNP	Nucleocapsid protein	N:P13L	C28311T
EPI_ISL_434556	28311	C	T	28311	29871	N	P13L	SNP	Nucleocapsid protein	N:P13L	C28311T
EPI_ISL_422966	28311	C	T	28275	29874	N	P13L	SNP	Nucleocapsid protein	N:P13L	C28311T
EPI_ISL_432984	28311	C	T	28311	29903	N	P13L	SNP	Nucleocapsid protein	N:P13L	C28311T
EPI_ISL_437454	28311	C	T	28311	29903	N	P13L	SNP	Nucleocapsid protein	N:P13L	C28311T
EPI_ISL_440716	28311	C	T	28257	29782	N	P13L	SNP	Nucleocapsid protein	N:P13L	C28311T
EPI_ISL_441576	28311	C	T	28257	29849	N	P13L	SNP	Nucleocapsid protein	N:P13L	C28311T
EPI_ISL_444482	28311	C	T	28311	29903	N	P13L	SNP	Nucleocapsid protein	N:P13L	C28311T
EPI_ISL_444905	28311	C	T	28311	29903	N	P13L	SNP	Nucleocapsid protein	N:P13L	C28311T
EPI_ISL_447568	28311	C	T	28273	29865	N	P13L	SNP	Nucleocapsid protein	N:P13L	C28311T
EPI_ISL_449199	28311	C	T	28257	29782	N	P13L	SNP	Nucleocapsid protein	N:P13L	C28311T
EPI_ISL_453175	28311	C	T	28311	29903	N	P13L	SNP	Nucleocapsid protein	N:P13L	C28311T
EPI_ISL_457085	28311	C	A	28299	29891	N	P13H	SNP	Nucleocapsid protein	N:P13H	C28311A
EPI_ISL_470879	28311	C	T	28311	29903	N	P13L	SNP	Nucleocapsid protein	N:P13L	C28311T
EPI_ISL_426956	28311	C	T	28311	29903	N	P13L	SNP	Nucleocapsid protein	N:P13L	C28311T
EPI_ISL_451564	28311	C	T	28045	29408	N	P13L	SNP	Nucleocapsid protein	N:P13L	C28311T
EPI_ISL_455078	28311	C	T	28045	29408	N	P13L	SNP	Nucleocapsid protein	N:P13L	C28311T
EPI_ISL_469112	28311	C	T	28311	29891	N	P13L	SNP	Nucleocapsid protein	N:P13L	C28311T
EPI_ISL_462309	28311	C	T	28311	29891	N	P13L	SNP	Nucleocapsid protein	N:P13L	C28311T
EPI_ISL_463025	28311	C	T	28311	29689	N	P13L	SNP	Nucleocapsid protein	N:P13L	C28311T
EPI_ISL_463046	28311	C	T	28311	29061	N	P13L	SNP	Nucleocapsid protein	N:P13L	C28311T
EPI_ISL_463047	28311	C	T	28311	29057	N	P13L	SNP	Nucleocapsid protein	N:P13L	C28311T
EPI_ISL_463049	28311	C	T	28311	29686	N	P13L	SNP	Nucleocapsid protein	N:P13L	C28311T
EPI_ISL_463050	28311	C	T	28311	29683	N	P13L	SNP	Nucleocapsid protein	N:P13L	C28311T
EPI_ISL_463051	28311	C	T	28311	29788	N	P13L	SNP	Nucleocapsid protein	N:P13L	C28311T
EPI_ISL_447572	28311	C	T	28272	29864	N	P13L	SNP	Nucleocapsid protein	N:P13L	C28311T
EPI_ISL_447866	28311	C	T	28281	29834	N	P13L	SNP	Nucleocapsid protein	N:P13L	C28311T
EPI_ISL_447853	28311	C	T	28273	29822	N	P13L	SNP	Nucleocapsid protein	N:P13L	C28311T
EPI_ISL_451489	28311	C	T	28045	29408	N	P13L	SNP	Nucleocapsid protein	N:P13L	C28311T
EPI_ISL_462427	28311	C	T	28311	29891	N	P13L	SNP	Nucleocapsid protein	N:P13L	C28311T
EPI_ISL_469096	28311	C	T	28311	29891	N	P13L	SNP	Nucleocapsid protein	N:P13L	C28311T
EPI_ISL_447849	28311	C	T	28273	29822	N	P13L	SNP	Nucleocapsid protein	N:P13L	C28311T
EPI_ISL_450787	28311	C	T	28311	29903	N	P13L	SNP	Nucleocapsid protein	N:P13L	C28311T
EPI_ISL_454548	28311	C	T	28311	29903	N	P13L	SNP	Nucleocapsid protein	N:P13L	C28311T
EPI_ISL_454539	28311	C	T	28311	29903	N	P13L	SNP	Nucleocapsid protein	N:P13L	C28311T
EPI_ISL_462320	28311	C	T	28311	29891	N	P13L	SNP	Nucleocapsid protein	N:P13L	C28311T
EPI_ISL_454865	28311	C	T	28311	29903	N	P13L	SNP	Nucleocapsid protein	N:P13L	C28311T
EPI_ISL_434557	28311	C	T	28311	29871	N	P13L	SNP	Nucleocapsid protein	N:P13L	C28311T
EPI_ISL_462419	28311	C	T	28311	29891	N	P13L	SNP	Nucleocapsid protein	N:P13L	C28311T
EPI_ISL_469138	28311	C	T	28311	29891	N	P13L	SNP	Nucleocapsid protein	N:P13L	C28311T
EPI_ISL_419932	28311	C	T	28274	29866	N	P13L	SNP	Nucleocapsid protein	N:P13L	C28311T
EPI_ISL_427746	28311	C	T	28047	29412	N	P13L	SNP	Nucleocapsid protein	N:P13L	C28311T
EPI_ISL_451666	28311	C	T	28307	29899	N	P13L	SNP	Nucleocapsid protein	N:P13L	C28311T
EPI_ISL_428843	28311	C	T	28309	29889	N	P13L	SNP	Nucleocapsid protein	N:P13L	C28311T
EPI_ISL_435088	28311	C	T	28311	29866	N	P13L	SNP	Nucleocapsid protein	N:P13L	C28311T
EPI_ISL_436137	28311	C	T	28311	29903	N	P13L	SNP	Nucleocapsid protein	N:P13L	C28311T
EPI_ISL_447559	28311	C	T	28293	29853	N	P13L	SNP	Nucleocapsid protein	N:P13L	C28311T
EPI_ISL_447852	28311	C	T	28273	29822	N	P13L	SNP	Nucleocapsid protein	N:P13L	C28311T
EPI_ISL_454568	28311	C	T	28311	29903	N	P13L	SNP	Nucleocapsid protein	N:P13L	C28311T
EPI_ISL_463038	28311	C	T	28311	29767	N	P13L	SNP	Nucleocapsid protein	N:P13L	C28311T
EPI_ISL_463041	28311	C	T	28311	29432	N	P13L	SNP	Nucleocapsid protein	N:P13L	C28311T
EPI_ISL_422407	28311	C	T	28311	29870	N	P13L	SNP	Nucleocapsid protein	N:P13L	C28311T
EPI_ISL_471964	28311	C	T	28311	29903	N	P13L	SNP	Nucleocapsid protein	N:P13L	C28311T
EPI_ISL_447558	28311	C	T	28273	29865	N	P13L	SNP	Nucleocapsid protein	N:P13L	C28311T
EPI_ISL_435089	28311	C	T	28311	29866	N	P13L	SNP	Nucleocapsid protein	N:P13L	C28311T
EPI_ISL_462318	28311	C	T	28311	29891	N	P13L	SNP	Nucleocapsid protein	N:P13L	C28311T
EPI_ISL_469148	28311	C	T	28311	29891	N	P13L	SNP	Nucleocapsid protein	N:P13L	C28311T
EPI_ISL_429175	28311	C	G	28310	29902	N	P13R	SNP	Nucleocapsid protein	N:P13R	C28311G
EPI_ISL_447019	28311	C	G	28257	29782	N	P13R	SNP	Nucleocapsid protein	N:P13R	C28311G
EPI_ISL_447025	28311	C	G	28257	29782	N	P13R	SNP	Nucleocapsid protein	N:P13R	C28311G
EPI_ISL_457283	28311	C	G	28311	29903	N	P13R	SNP	Nucleocapsid protein	N:P13R	C28311G
EPI_ISL_462340	28311	C	T	28311	29891	N	P13L	SNP	Nucleocapsid protein	N:P13L	C28311T
EPI_ISL_462353	28311	C	T	28311	29891	N	P13L	SNP	Nucleocapsid protein	N:P13L	C28311T
EPI_ISL_462383	28311	C	T	28311	29891	N	P13L	SNP	Nucleocapsid protein	N:P13L	C28311T
EPI_ISL_445842	28311	C	T	28285	29877	N	P13L	SNP	Nucleocapsid protein	N:P13L	C28311T
EPI_ISL_446484	28311	C	T	28310	29902	N	P13L	SNP	Nucleocapsid protein	N:P13L	C28311T
EPI_ISL_446494	28311	C	T	28296	29888	N	P13L	SNP	Nucleocapsid protein	N:P13L	C28311T
EPI_ISL_446497	28311	C	T	28273	29865	N	P13L	SNP	Nucleocapsid protein	N:P13L	C28311T
EPI_ISL_446515	28311	C	T	28273	29865	N	P13L	SNP	Nucleocapsid protein	N:P13L	C28311T
EPI_ISL_446570	28311	C	T	28302	29894	N	P13L	SNP	Nucleocapsid protein	N:P13L	C28311T
EPI_ISL_446916	28311	C	T	28273	29865	N	P13L	SNP	Nucleocapsid protein	N:P13L	C28311T
EPI_ISL_472523	28311	C	T	28304	29896	N	P13L	SNP	Nucleocapsid protein	N:P13L	C28311T
EPI_ISL_472590	28311	C	T	28281	29873	N	P13L	SNP	Nucleocapsid protein	N:P13L	C28311T
EPI_ISL_472640	28311	C	T	28294	29886	N	P13L	SNP	Nucleocapsid protein	N:P13L	C28311T
EPI_ISL_472650	28311	C	T	28312	29904	N	P13L	SNP	Nucleocapsid protein	N:P13L	C28311T
EPI_ISL_472671	28311	C	T	28312	29904	N	P13L	SNP	Nucleocapsid protein	N:P13L	C28311T
EPI_ISL_472786	28311	C	T	28282	29874	N	P13L	SNP	Nucleocapsid protein	N:P13L	C28311T
EPI_ISL_472787	28311	C	T	28298	29843	N	P13L	SNP	Nucleocapsid protein	N:P13L	C28311T
EPI_ISL_472794	28311	C	T	28284	29876	N	P13L	SNP	Nucleocapsid protein	N:P13L	C28311T
EPI_ISL_472843	28311	C	T	28314	29906	N	P13L	SNP	Nucleocapsid protein	N:P13L	C28311T
EPI_ISL_472894	28311	C	T	28278	29870	N	P13L	SNP	Nucleocapsid protein	N:P13L	C28311T
EPI_ISL_472934	28311	C	T	28304	29896	N	P13L	SNP	Nucleocapsid protein	N:P13L	C28311T
EPI_ISL_472950	28311	C	T	28314	29906	N	P13L	SNP	Nucleocapsid protein	N:P13L	C28311T
EPI_ISL_472996	28311	C	T	28284	29876	N	P13L	SNP	Nucleocapsid protein	N:P13L	C28311T
EPI_ISL_473032	28311	C	T	28310	29902	N	P13L	SNP	Nucleocapsid protein	N:P13L	C28311T
EPI_ISL_473148	28311	C	T	28284	29876	N	P13L	SNP	Nucleocapsid protein	N:P13L	C28311T
EPI_ISL_473258	28311	C	T	28314	29906	N	P13L	SNP	Nucleocapsid protein	N:P13L	C28311T
EPI_ISL_473303	28311	C	T	28278	29870	N	P13L	SNP	Nucleocapsid protein	N:P13L	C28311T
EPI_ISL_474001	28311	C	T	28310	29902	N	P13L	SNP	Nucleocapsid protein	N:P13L	C28311T
EPI_ISL_474013	28311	C	T	28307	29899	N	P13L	SNP	Nucleocapsid protein	N:P13L	C28311T
EPI_ISL_474203	28311	C	T	28284	29876	N	P13L	SNP	Nucleocapsid protein	N:P13L	C28311T
EPI_ISL_474402	28311	C	T	28307	29899	N	P13L	SNP	Nucleocapsid protein	N:P13L	C28311T
EPI_ISL_474491	28311	C	T	28273	29865	N	P13L	SNP	Nucleocapsid protein	N:P13L	C28311T
EPI_ISL_447859	28311	C	T	28302	29851	N	P13L	SNP	Nucleocapsid protein	N:P13L	C28311T
EPI_ISL_462382	28311	C	T	28311	29891	N	P13L	SNP	Nucleocapsid protein	N:P13L	C28311T
EPI_ISL_451532	28311	C	T	28045	29408	N	P13L	SNP	Nucleocapsid protein	N:P13L	C28311T
EPI_ISL_463010	28311	C	T	28311	29688	N	P13L	SNP	Nucleocapsid protein	N:P13L	C28311T
EPI_ISL_463011	28311	C	T	28311	29683	N	P13L	SNP	Nucleocapsid protein	N:P13L	C28311T
EPI_ISL_462423	28311	C	T	28311	29891	N	P13L	SNP	Nucleocapsid protein	N:P13L	C28311T
EPI_ISL_462412	28311	C	T	28311	29891	N	P13L	SNP	Nucleocapsid protein	N:P13L	C28311T
EPI_ISL_435090	28311	C	T	28311	29867	N	P13L	SNP	Nucleocapsid protein	N:P13L	C28311T
EPI_ISL_435091	28311	C	T	28311	29867	N	P13L	SNP	Nucleocapsid protein	N:P13L	C28311T
EPI_ISL_436425	28311	C	T	28311	29867	N	P13L	SNP	Nucleocapsid protein	N:P13L	C28311T
EPI_ISL_436430	28311	C	T	28311	29866	N	P13L	SNP	Nucleocapsid protein	N:P13L	C28311T
EPI_ISL_447561	28311	C	T	28272	29864	N	P13L	SNP	Nucleocapsid protein	N:P13L	C28311T
EPI_ISL_447581	28311	C	T	28262	29854	N	P13L	SNP	Nucleocapsid protein	N:P13L	C28311T
EPI_ISL_447855	28311	C	T	28273	29822	N	P13L	SNP	Nucleocapsid protein	N:P13L	C28311T
EPI_ISL_454543	28311	C	T	28311	29903	N	P13L	SNP	Nucleocapsid protein	N:P13L	C28311T
EPI_ISL_454554	28311	C	T	28311	29903	N	P13L	SNP	Nucleocapsid protein	N:P13L	C28311T
EPI_ISL_447569	28311	C	T	28272	29864	N	P13L	SNP	Nucleocapsid protein	N:P13L	C28311T
EPI_ISL_447576	28311	C	T	28274	29866	N	P13L	SNP	Nucleocapsid protein	N:P13L	C28311T
EPI_ISL_456423	28311	C	T	28311	29903	N	P13L	SNP	Nucleocapsid protein	N:P13L	C28311T
EPI_ISL_456425	28311	C	T	28311	29903	N	P13L	SNP	Nucleocapsid protein	N:P13L	C28311T
EPI_ISL_450321	28311	C	T	28273	29821	N	P13L	SNP	Nucleocapsid protein	N:P13L	C28311T
EPI_ISL_436433	28311	C	T	28311	29866	N	P13L	SNP	Nucleocapsid protein	N:P13L	C28311T
EPI_ISL_436451	28311	C	T	28311	29866	N	P13L	SNP	Nucleocapsid protein	N:P13L	C28311T
EPI_ISL_437438	28311	C	T	28311	29903	N	P13L	SNP	Nucleocapsid protein	N:P13L	C28311T
EPI_ISL_447570	28311	C	T	28272	29864	N	P13L	SNP	Nucleocapsid protein	N:P13L	C28311T
EPI_ISL_447862	28311	C	T	28291	29840	N	P13L	SNP	Nucleocapsid protein	N:P13L	C28311T
EPI_ISL_447865	28311	C	T	28281	29834	N	P13L	SNP	Nucleocapsid protein	N:P13L	C28311T
EPI_ISL_450326	28311	C	T	28282	29830	N	P13L	SNP	Nucleocapsid protein	N:P13L	C28311T
EPI_ISL_452215	28311	C	T	28286	29805	N	P13L	SNP	Nucleocapsid protein	N:P13L	C28311T
EPI_ISL_454561	28311	C	T	28311	29903	N	P13L	SNP	Nucleocapsid protein	N:P13L	C28311T
EPI_ISL_455656	28311	C	T	28311	29903	N	P13L	SNP	Nucleocapsid protein	N:P13L	C28311T
EPI_ISL_458062	28311	C	T	28271	29824	N	P13L	SNP	Nucleocapsid protein	N:P13L	C28311T
EPI_ISL_458063	28311	C	T	28271	29824	N	P13L	SNP	Nucleocapsid protein	N:P13L	C28311T
EPI_ISL_458069	28311	C	T	28271	29824	N	P13L	SNP	Nucleocapsid protein	N:P13L	C28311T
EPI_ISL_458073	28311	C	T	28281	29839	N	P13L	SNP	Nucleocapsid protein	N:P13L	C28311T
EPI_ISL_458074	28311	C	T	28281	29839	N	P13L	SNP	Nucleocapsid protein	N:P13L	C28311T
EPI_ISL_458076	28311	C	T	28281	29839	N	P13L	SNP	Nucleocapsid protein	N:P13L	C28311T
EPI_ISL_458298	28311	C	T	28271	29824	N	P13L	SNP	Nucleocapsid protein	N:P13L	C28311T
EPI_ISL_463031	28311	C	T	28311	29685	N	P13L	SNP	Nucleocapsid protein	N:P13L	C28311T
EPI_ISL_471641	28311	C	T	28282	29840	N	P13L	SNP	Nucleocapsid protein	N:P13L	C28311T
EPI_ISL_471642	28311	C	T	28282	29840	N	P13L	SNP	Nucleocapsid protein	N:P13L	C28311T
EPI_ISL_471643	28311	C	T	28278	29833	N	P13L	SNP	Nucleocapsid protein	N:P13L	C28311T
EPI_ISL_447250	28311	C	T	28311	29903	N	P13L	SNP	Nucleocapsid protein	N:P13L	C28311T
EPI_ISL_474986	28311	C	T	28311	29903	N	P13L	SNP	Nucleocapsid protein	N:P13L	C28311T
EPI_ISL_475002	28311	C	T	28311	29903	N	P13L	SNP	Nucleocapsid protein	N:P13L	C28311T
EPI_ISL_475025	28311	C	T	28311	29903	N	P13L	SNP	Nucleocapsid protein	N:P13L	C28311T
EPI_ISL_462335	28311	C	T	28311	29891	N	P13L	SNP	Nucleocapsid protein	N:P13L	C28311T
EPI_ISL_451147	28311	C	T	28311	29903	N	P13L	SNP	Nucleocapsid protein	N:P13L	C28311T
EPI_ISL_455602	28311	C	T	28311	29903	N	P13L	SNP	Nucleocapsid protein	N:P13L	C28311T
EPI_ISL_435686	28311	C	T	28303	29816	N	P13L	SNP	Nucleocapsid protein	N:P13L	C28311T
EPI_ISL_462342	28311	C	T	28311	29891	N	P13L	SNP	Nucleocapsid protein	N:P13L	C28311T
EPI_ISL_462421	28311	C	T	28311	29891	N	P13L	SNP	Nucleocapsid protein	N:P13L	C28311T
EPI_ISL_462430	28311	C	T	28311	29891	N	P13L	SNP	Nucleocapsid protein	N:P13L	C28311T
EPI_ISL_469110	28311	C	T	28311	29891	N	P13L	SNP	Nucleocapsid protein	N:P13L	C28311T
EPI_ISL_427753	28311	C	T	28047	29412	N	P13L	SNP	Nucleocapsid protein	N:P13L	C28311T
EPI_ISL_454555	28311	C	T	28311	29903	N	P13L	SNP	Nucleocapsid protein	N:P13L	C28311T
EPI_ISL_459954	28311	C	T	28355	29928	N	P13L	SNP	Nucleocapsid protein	N:P13L	C28311T
EPI_ISL_451580	28311	C	T	28045	29408	N	P13L	SNP	Nucleocapsid protein	N:P13L	C28311T
EPI_ISL_419946	28311	C	T	28307	29899	N	P13L	SNP	Nucleocapsid protein	N:P13L	C28311T
EPI_ISL_443188	28311	C	T	28311	29891	N	P13L	SNP	Nucleocapsid protein	N:P13L	C28311T
EPI_ISL_451539	28311	C	T	28045	29408	N	P13L	SNP	Nucleocapsid protein	N:P13L	C28311T
EPI_ISL_462338	28311	C	T	28311	29834	N	P13L	SNP	Nucleocapsid protein	N:P13L	C28311T
EPI_ISL_426853	28311	C	T	28311	29903	N	P13L	SNP	Nucleocapsid protein	N:P13L	C28311T
EPI_ISL_447584	28311	C	T	28274	29866	N	P13L	SNP	Nucleocapsid protein	N:P13L	C28311T
EPI_ISL_447585	28311	C	T	28276	29868	N	P13L	SNP	Nucleocapsid protein	N:P13L	C28311T
EPI_ISL_447586	28311	C	T	28273	29865	N	P13L	SNP	Nucleocapsid protein	N:P13L	C28311T
EPI_ISL_447847	28311	C	T	28273	29822	N	P13L	SNP	Nucleocapsid protein	N:P13L	C28311T
EPI_ISL_434698	28311	C	T	28291	29804	N	P13L	SNP	Nucleocapsid protein	N:P13L	C28311T
EPI_ISL_447921	28311	C	T	28311	29899	N	P13L	SNP	Nucleocapsid protein	N:P13L	C28311T
EPI_ISL_455927	28311	C	T	28300	29892	N	P13L	SNP	Nucleocapsid protein	N:P13L	C28311T
EPI_ISL_417917	28311	C	T	28311	29903	N	P13L	SNP	Nucleocapsid protein	N:P13L	C28311T
EPI_ISL_463023	28311	C	T	28311	29682	N	P13L	SNP	Nucleocapsid protein	N:P13L	C28311T
EPI_ISL_435674	28311	C	T	28266	29705	N	P13L	SNP	Nucleocapsid protein	N:P13L	C28311T
EPI_ISL_435675	28311	C	T	28310	29837	N	P13L	SNP	Nucleocapsid protein	N:P13L	C28311T
EPI_ISL_443187	28311	C	T	28309	29859	N	P13L	SNP	Nucleocapsid protein	N:P13L	C28311T
EPI_ISL_471584	28311	C	T	28278	29833	N	P13L	SNP	Nucleocapsid protein	N:P13L	C28311T
EPI_ISL_462418	28311	C	T	28311	29891	N	P13L	SNP	Nucleocapsid protein	N:P13L	C28311T
EPI_ISL_435082	28311	C	T	28311	29866	N	P13L	SNP	Nucleocapsid protein	N:P13L	C28311T
EPI_ISL_436156	28311	C	T	28311	29903	N	P13L	SNP	Nucleocapsid protein	N:P13L	C28311T
EPI_ISL_436157	28311	C	T	28311	29903	N	P13L	SNP	Nucleocapsid protein	N:P13L	C28311T
EPI_ISL_456534	28311	C	T	28311	29903	N	P13L	SNP	Nucleocapsid protein	N:P13L	C28311T
EPI_ISL_456536	28311	C	T	28311	29903	N	P13L	SNP	Nucleocapsid protein	N:P13L	C28311T
EPI_ISL_428842	28311	C	T	28306	29886	N	P13L	SNP	Nucleocapsid protein	N:P13L	C28311T
EPI_ISL_443212	28311	C	T	28311	29891	N	P13L	SNP	Nucleocapsid protein	N:P13L	C28311T
EPI_ISL_462308	28311	C	T	28311	29891	N	P13L	SNP	Nucleocapsid protein	N:P13L	C28311T
EPI_ISL_462314	28311	C	T	28311	29891	N	P13L	SNP	Nucleocapsid protein	N:P13L	C28311T
EPI_ISL_462394	28311	C	T	28311	29891	N	P13L	SNP	Nucleocapsid protein	N:P13L	C28311T
EPI_ISL_462424	28311	C	T	28311	29891	N	P13L	SNP	Nucleocapsid protein	N:P13L	C28311T
EPI_ISL_469091	28311	C	T	28311	29891	N	P13L	SNP	Nucleocapsid protein	N:P13L	C28311T
EPI_ISL_469093	28311	C	T	28311	29891	N	P13L	SNP	Nucleocapsid protein	N:P13L	C28311T
EPI_ISL_469131	28311	C	T	28311	29891	N	P13L	SNP	Nucleocapsid protein	N:P13L	C28311T
EPI_ISL_469152	28311	C	T	28311	29891	N	P13L	SNP	Nucleocapsid protein	N:P13L	C28311T
EPI_ISL_456462	28311	C	T	28311	29903	N	P13L	SNP	Nucleocapsid protein	N:P13L	C28311T
EPI_ISL_456502	28311	C	T	28311	29903	N	P13L	SNP	Nucleocapsid protein	N:P13L	C28311T
EPI_ISL_469144	28311	C	T	28311	29891	N	P13L	SNP	Nucleocapsid protein	N:P13L	C28311T
EPI_ISL_462343	28311	C	T	28311	29891	N	P13L	SNP	Nucleocapsid protein	N:P13L	C28311T
EPI_ISL_431783	28311	C	T	28295	29845	N	P13L	SNP	Nucleocapsid protein	N:P13L	C28311T
EPI_ISL_431784	28311	C	T	28296	29859	N	P13L	SNP	Nucleocapsid protein	N:P13L	C28311T
EPI_ISL_426700	28311	C	T	28295	29887	N	P13L	SNP	Nucleocapsid protein	N:P13L	C28311T
EPI_ISL_426767	28311	C	T	28311	29903	N	P13L	SNP	Nucleocapsid protein	N:P13L	C28311T
EPI_ISL_436440	28311	C	T	28311	29866	N	P13L	SNP	Nucleocapsid protein	N:P13L	C28311T
EPI_ISL_463053	28311	C	T	28311	29449	N	P13L	SNP	Nucleocapsid protein	N:P13L	C28311T
EPI_ISL_469095	28311	C	T	28311	29891	N	P13L	SNP	Nucleocapsid protein	N:P13L	C28311T
EPI_ISL_451487	28311	C	T	28045	29408	N	P13L	SNP	Nucleocapsid protein	N:P13L	C28311T
EPI_ISL_451488	28311	C	T	28045	29408	N	P13L	SNP	Nucleocapsid protein	N:P13L	C28311T
EPI_ISL_447858	28311	C	T	28273	29822	N	P13L	SNP	Nucleocapsid protein	N:P13L	C28311T
EPI_ISL_458072	28311	C	T	28281	29839	N	P13L	SNP	Nucleocapsid protein	N:P13L	C28311T
EPI_ISL_471585	28311	C	T	28282	29840	N	P13L	SNP	Nucleocapsid protein	N:P13L	C28311T
EPI_ISL_435087	28311	C	T	28311	29866	N	P13L	SNP	Nucleocapsid protein	N:P13L	C28311T
EPI_ISL_462322	28311	C	T	28311	29891	N	P13L	SNP	Nucleocapsid protein	N:P13L	C28311T
EPI_ISL_462326	28311	C	T	28311	29891	N	P13L	SNP	Nucleocapsid protein	N:P13L	C28311T
EPI_ISL_462327	28311	C	T	28311	29891	N	P13L	SNP	Nucleocapsid protein	N:P13L	C28311T
EPI_ISL_437442	28311	C	T	28311	29903	N	P13L	SNP	Nucleocapsid protein	N:P13L	C28311T
EPI_ISL_431833	28311	C	T	28311	29871	N	P13L	SNP	Nucleocapsid protein	N:P13L	C28311T
EPI_ISL_454552	28311	C	T	28311	29903	N	P13L	SNP	Nucleocapsid protein	N:P13L	C28311T
EPI_ISL_451096	28311	C	T	28311	29903	N	P13L	SNP	Nucleocapsid protein	N:P13L	C28311T
EPI_ISL_447864	28311	C	T	28276	29825	N	P13L	SNP	Nucleocapsid protein	N:P13L	C28311T
EPI_ISL_469089	28311	C	T	28311	29891	N	P13L	SNP	Nucleocapsid protein	N:P13L	C28311T
EPI_ISL_416449	28311	C	T	28014	29605	N	P13L	SNP	Nucleocapsid protein	N:P13L	C28311T
EPI_ISL_435695	28311	C	T	28282	29862	N	P13L	SNP	Nucleocapsid protein	N:P13L	C28311T
EPI_ISL_451154	28311	C	T	28311	29903	N	P13L	SNP	Nucleocapsid protein	N:P13L	C28311T
EPI_ISL_451156	28311	C	T	28311	29903	N	P13L	SNP	Nucleocapsid protein	N:P13L	C28311T
EPI_ISL_451159	28311	C	T	28311	29903	N	P13L	SNP	Nucleocapsid protein	N:P13L	C28311T
EPI_ISL_451161	28311	C	T	28311	29903	N	P13L	SNP	Nucleocapsid protein	N:P13L	C28311T
EPI_ISL_452793	28311	C	T	28281	29833	N	P13L	SNP	Nucleocapsid protein	N:P13L	C28311T
EPI_ISL_419728	28311	C	T	28278	29870	N	P13L	SNP	Nucleocapsid protein	N:P13L	C28311T
EPI_ISL_419927	28311	C	T	28273	29865	N	P13L	SNP	Nucleocapsid protein	N:P13L	C28311T
EPI_ISL_419939	28311	C	T	28308	29900	N	P13L	SNP	Nucleocapsid protein	N:P13L	C28311T
EPI_ISL_419970	28311	C	T	28309	29901	N	P13L	SNP	Nucleocapsid protein	N:P13L	C28311T
EPI_ISL_419986	28311	C	T	28309	29901	N	P13L	SNP	Nucleocapsid protein	N:P13L	C28311T
EPI_ISL_419995	28311	C	T	28307	29899	N	P13L	SNP	Nucleocapsid protein	N:P13L	C28311T
EPI_ISL_420036	28311	C	T	28309	29901	N	P13L	SNP	Nucleocapsid protein	N:P13L	C28311T
EPI_ISL_420524	28311	C	T	28311	29903	N	P13L	SNP	Nucleocapsid protein	N:P13L	C28311T
EPI_ISL_426483	28311	C	T	28311	29882	N	P13L	SNP	Nucleocapsid protein	N:P13L	C28311T
EPI_ISL_426634	28311	C	T	28311	29903	N	P13L	SNP	Nucleocapsid protein	N:P13L	C28311T
EPI_ISL_426659	28311	C	T	28309	29852	N	P13L	SNP	Nucleocapsid protein	N:P13L	C28311T
EPI_ISL_426666	28311	C	T	28273	29865	N	P13L	SNP	Nucleocapsid protein	N:P13L	C28311T
EPI_ISL_426688	28311	C	T	28281	29873	N	P13L	SNP	Nucleocapsid protein	N:P13L	C28311T
EPI_ISL_426715	28311	C	T	28311	29903	N	P13L	SNP	Nucleocapsid protein	N:P13L	C28311T
EPI_ISL_426732	28311	C	T	28311	29903	N	P13L	SNP	Nucleocapsid protein	N:P13L	C28311T
EPI_ISL_426825	28311	C	T	28311	29903	N	P13L	SNP	Nucleocapsid protein	N:P13L	C28311T
EPI_ISL_426841	28311	C	T	28311	29903	N	P13L	SNP	Nucleocapsid protein	N:P13L	C28311T
EPI_ISL_426842	28311	C	T	28311	29903	N	P13L	SNP	Nucleocapsid protein	N:P13L	C28311T
EPI_ISL_426852	28311	C	T	28311	29903	N	P13L	SNP	Nucleocapsid protein	N:P13L	C28311T
EPI_ISL_426855	28311	C	T	28311	29903	N	P13L	SNP	Nucleocapsid protein	N:P13L	C28311T
EPI_ISL_426856	28311	C	T	28311	29903	N	P13L	SNP	Nucleocapsid protein	N:P13L	C28311T
EPI_ISL_426857	28311	C	T	28311	29902	N	P13L	SNP	Nucleocapsid protein	N:P13L	C28311T
EPI_ISL_426943	28311	C	T	28311	29903	N	P13L	SNP	Nucleocapsid protein	N:P13L	C28311T
EPI_ISL_426945	28311	C	T	28311	29903	N	P13L	SNP	Nucleocapsid protein	N:P13L	C28311T
EPI_ISL_426952	28311	C	T	28311	29903	N	P13L	SNP	Nucleocapsid protein	N:P13L	C28311T
EPI_ISL_426967	28311	C	T	28173	29765	N	P13L	SNP	Nucleocapsid protein	N:P13L	C28311T
EPI_ISL_426971	28311	C	T	28311	29903	N	P13L	SNP	Nucleocapsid protein	N:P13L	C28311T
EPI_ISL_427046	28311	C	T	28311	29903	N	P13L	SNP	Nucleocapsid protein	N:P13L	C28311T
EPI_ISL_427052	28311	C	T	28173	29765	N	P13L	SNP	Nucleocapsid protein	N:P13L	C28311T
EPI_ISL_427066	28311	C	T	28311	29903	N	P13L	SNP	Nucleocapsid protein	N:P13L	C28311T
EPI_ISL_427067	28311	C	T	28311	29903	N	P13L	SNP	Nucleocapsid protein	N:P13L	C28311T
EPI_ISL_427142	28311	C	T	28311	29902	N	P13L	SNP	Nucleocapsid protein	N:P13L	C28311T
EPI_ISL_427144	28311	C	T	28311	29903	N	P13L	SNP	Nucleocapsid protein	N:P13L	C28311T
EPI_ISL_427667	28311	C	T	28047	29412	N	P13L	SNP	Nucleocapsid protein	N:P13L	C28311T
EPI_ISL_427670	28311	C	T	28047	29412	N	P13L	SNP	Nucleocapsid protein	N:P13L	C28311T
EPI_ISL_427671	28311	C	T	28041	29406	N	P13L	SNP	Nucleocapsid protein	N:P13L	C28311T
EPI_ISL_427684	28311	C	T	28047	29412	N	P13L	SNP	Nucleocapsid protein	N:P13L	C28311T
EPI_ISL_427685	28311	C	T	28047	29412	N	P13L	SNP	Nucleocapsid protein	N:P13L	C28311T
EPI_ISL_427691	28311	C	T	28047	29412	N	P13L	SNP	Nucleocapsid protein	N:P13L	C28311T
EPI_ISL_427694	28311	C	T	28047	29412	N	P13L	SNP	Nucleocapsid protein	N:P13L	C28311T
EPI_ISL_427695	28311	C	T	28047	29412	N	P13L	SNP	Nucleocapsid protein	N:P13L	C28311T
EPI_ISL_427699	28311	C	T	28041	29406	N	P13L	SNP	Nucleocapsid protein	N:P13L	C28311T
EPI_ISL_427701	28311	C	T	28047	29412	N	P13L	SNP	Nucleocapsid protein	N:P13L	C28311T
EPI_ISL_427707	28311	C	T	28047	29412	N	P13L	SNP	Nucleocapsid protein	N:P13L	C28311T
EPI_ISL_427709	28311	C	T	28047	29412	N	P13L	SNP	Nucleocapsid protein	N:P13L	C28311T
EPI_ISL_427710	28311	C	T	28047	29412	N	P13L	SNP	Nucleocapsid protein	N:P13L	C28311T
EPI_ISL_427713	28311	C	T	28047	29412	N	P13L	SNP	Nucleocapsid protein	N:P13L	C28311T
EPI_ISL_427714	28311	C	T	28047	29412	N	P13L	SNP	Nucleocapsid protein	N:P13L	C28311T
EPI_ISL_427736	28311	C	T	28047	29412	N	P13L	SNP	Nucleocapsid protein	N:P13L	C28311T
EPI_ISL_427740	28311	C	T	28047	29412	N	P13L	SNP	Nucleocapsid protein	N:P13L	C28311T
EPI_ISL_427745	28311	C	T	28047	29412	N	P13L	SNP	Nucleocapsid protein	N:P13L	C28311T
EPI_ISL_427747	28311	C	T	28047	29412	N	P13L	SNP	Nucleocapsid protein	N:P13L	C28311T
EPI_ISL_427752	28311	C	T	28047	29412	N	P13L	SNP	Nucleocapsid protein	N:P13L	C28311T
EPI_ISL_427755	28311	C	T	28047	29412	N	P13L	SNP	Nucleocapsid protein	N:P13L	C28311T
EPI_ISL_427762	28311	C	T	28047	29412	N	P13L	SNP	Nucleocapsid protein	N:P13L	C28311T
EPI_ISL_427763	28311	C	T	28047	29412	N	P13L	SNP	Nucleocapsid protein	N:P13L	C28311T
EPI_ISL_427765	28311	C	T	28047	29412	N	P13L	SNP	Nucleocapsid protein	N:P13L	C28311T
EPI_ISL_427767	28311	C	T	28047	29412	N	P13L	SNP	Nucleocapsid protein	N:P13L	C28311T
EPI_ISL_427786	28311	C	T	28047	29412	N	P13L	SNP	Nucleocapsid protein	N:P13L	C28311T
EPI_ISL_427792	28311	C	T	28047	29412	N	P13L	SNP	Nucleocapsid protein	N:P13L	C28311T
EPI_ISL_427793	28311	C	T	28047	29412	N	P13L	SNP	Nucleocapsid protein	N:P13L	C28311T
EPI_ISL_427797	28311	C	T	28047	29412	N	P13L	SNP	Nucleocapsid protein	N:P13L	C28311T
EPI_ISL_427798	28311	C	T	28047	29412	N	P13L	SNP	Nucleocapsid protein	N:P13L	C28311T
EPI_ISL_427803	28311	C	T	28047	29412	N	P13L	SNP	Nucleocapsid protein	N:P13L	C28311T
EPI_ISL_427806	28311	C	T	28047	29412	N	P13L	SNP	Nucleocapsid protein	N:P13L	C28311T
EPI_ISL_427807	28311	C	T	28047	29412	N	P13L	SNP	Nucleocapsid protein	N:P13L	C28311T
EPI_ISL_430477	28311	C	T	28311	29903	N	P13L	SNP	Nucleocapsid protein	N:P13L	C28311T
EPI_ISL_430479	28311	C	T	28311	29903	N	P13L	SNP	Nucleocapsid protein	N:P13L	C28311T
EPI_ISL_430542	28311	C	T	28311	29903	N	P13L	SNP	Nucleocapsid protein	N:P13L	C28311T
EPI_ISL_430543	28311	C	T	28311	29903	N	P13L	SNP	Nucleocapsid protein	N:P13L	C28311T
EPI_ISL_430549	28311	C	T	28311	29903	N	P13L	SNP	Nucleocapsid protein	N:P13L	C28311T
EPI_ISL_430584	28311	C	T	28311	29903	N	P13L	SNP	Nucleocapsid protein	N:P13L	C28311T
EPI_ISL_430585	28311	C	T	28311	29903	N	P13L	SNP	Nucleocapsid protein	N:P13L	C28311T
EPI_ISL_430692	28311	C	T	28311	29903	N	P13L	SNP	Nucleocapsid protein	N:P13L	C28311T
EPI_ISL_430703	28311	C	T	28311	29903	N	P13L	SNP	Nucleocapsid protein	N:P13L	C28311T
EPI_ISL_436098	28311	C	T	28310	29869	N	P13L	SNP	Nucleocapsid protein	N:P13L	C28311T
EPI_ISL_451080	28311	C	T	28311	29903	N	P13L	SNP	Nucleocapsid protein	N:P13L	C28311T
EPI_ISL_451081	28311	C	T	28275	29867	N	P13L	SNP	Nucleocapsid protein	N:P13L	C28311T
EPI_ISL_451086	28311	C	T	28274	29866	N	P13L	SNP	Nucleocapsid protein	N:P13L	C28311T
EPI_ISL_451104	28311	C	T	28311	29903	N	P13L	SNP	Nucleocapsid protein	N:P13L	C28311T
EPI_ISL_451140	28311	C	T	28303	29895	N	P13L	SNP	Nucleocapsid protein	N:P13L	C28311T
EPI_ISL_451496	28311	C	T	28045	29408	N	P13L	SNP	Nucleocapsid protein	N:P13L	C28311T
EPI_ISL_451506	28311	C	T	28045	29408	N	P13L	SNP	Nucleocapsid protein	N:P13L	C28311T
EPI_ISL_451513	28311	C	T	28045	29408	N	P13L	SNP	Nucleocapsid protein	N:P13L	C28311T
EPI_ISL_451520	28311	C	T	28045	29408	N	P13L	SNP	Nucleocapsid protein	N:P13L	C28311T
EPI_ISL_451537	28311	C	T	28045	29408	N	P13L	SNP	Nucleocapsid protein	N:P13L	C28311T
EPI_ISL_451549	28311	C	T	28045	29408	N	P13L	SNP	Nucleocapsid protein	N:P13L	C28311T
EPI_ISL_451552	28311	C	T	28045	29408	N	P13L	SNP	Nucleocapsid protein	N:P13L	C28311T
EPI_ISL_451571	28311	C	T	28045	29408	N	P13L	SNP	Nucleocapsid protein	N:P13L	C28311T
EPI_ISL_451590	28311	C	T	28045	29408	N	P13L	SNP	Nucleocapsid protein	N:P13L	C28311T
EPI_ISL_451592	28311	C	T	28045	29408	N	P13L	SNP	Nucleocapsid protein	N:P13L	C28311T
EPI_ISL_453835	28311	C	T	28211	29703	N	P13L	SNP	Nucleocapsid protein	N:P13L	C28311T
EPI_ISL_453836	28311	C	T	28207	29699	N	P13L	SNP	Nucleocapsid protein	N:P13L	C28311T
EPI_ISL_455042	28311	C	T	28045	29408	N	P13L	SNP	Nucleocapsid protein	N:P13L	C28311T
EPI_ISL_455044	28311	C	T	28045	29408	N	P13L	SNP	Nucleocapsid protein	N:P13L	C28311T
EPI_ISL_455045	28311	C	T	28045	29408	N	P13L	SNP	Nucleocapsid protein	N:P13L	C28311T
EPI_ISL_455054	28311	C	T	28045	29408	N	P13L	SNP	Nucleocapsid protein	N:P13L	C28311T
EPI_ISL_455086	28311	C	T	28045	29408	N	P13L	SNP	Nucleocapsid protein	N:P13L	C28311T
EPI_ISL_455089	28311	C	T	28045	29408	N	P13L	SNP	Nucleocapsid protein	N:P13L	C28311T
EPI_ISL_455096	28311	C	T	28045	29408	N	P13L	SNP	Nucleocapsid protein	N:P13L	C28311T
EPI_ISL_456277	28311	C	T	28311	29903	N	P13L	SNP	Nucleocapsid protein	N:P13L	C28311T
EPI_ISL_456336	28311	C	T	28311	29903	N	P13L	SNP	Nucleocapsid protein	N:P13L	C28311T
EPI_ISL_456343	28311	C	T	28311	29903	N	P13L	SNP	Nucleocapsid protein	N:P13L	C28311T
EPI_ISL_456368	28311	C	T	28311	29903	N	P13L	SNP	Nucleocapsid protein	N:P13L	C28311T
EPI_ISL_456427	28311	C	T	28311	29903	N	P13L	SNP	Nucleocapsid protein	N:P13L	C28311T
EPI_ISL_462917	28311	C	T	28308	29898	N	P13L	SNP	Nucleocapsid protein	N:P13L	C28311T
EPI_ISL_462932	28311	C	T	28301	29893	N	P13L	SNP	Nucleocapsid protein	N:P13L	C28311T
EPI_ISL_462933	28311	C	T	28300	29855	N	P13L	SNP	Nucleocapsid protein	N:P13L	C28311T
EPI_ISL_467998	28311	C	T	28274	29866	N	P13L	SNP	Nucleocapsid protein	N:P13L	C28311T
EPI_ISL_468006	28311	C	T	28281	29873	N	P13L	SNP	Nucleocapsid protein	N:P13L	C28311T
EPI_ISL_468008	28311	C	T	28294	29886	N	P13L	SNP	Nucleocapsid protein	N:P13L	C28311T
EPI_ISL_468011	28311	C	T	28310	29902	N	P13L	SNP	Nucleocapsid protein	N:P13L	C28311T
EPI_ISL_468018	28311	C	T	28311	29903	N	P13L	SNP	Nucleocapsid protein	N:P13L	C28311T
EPI_ISL_468027	28311	C	T	28311	29903	N	P13L	SNP	Nucleocapsid protein	N:P13L	C28311T
EPI_ISL_468030	28311	C	T	28311	29903	N	P13L	SNP	Nucleocapsid protein	N:P13L	C28311T
EPI_ISL_468034	28311	C	T	28309	29901	N	P13L	SNP	Nucleocapsid protein	N:P13L	C28311T
EPI_ISL_468042	28311	C	T	28311	29903	N	P13L	SNP	Nucleocapsid protein	N:P13L	C28311T
EPI_ISL_468517	28311	C	T	28309	29854	N	P13L	SNP	Nucleocapsid protein	N:P13L	C28311T
EPI_ISL_468518	28311	C	T	28299	29891	N	P13L	SNP	Nucleocapsid protein	N:P13L	C28311T
EPI_ISL_470832	28311	C	T	28067	29612	N	P13L	SNP	Nucleocapsid protein	N:P13L	C28311T
EPI_ISL_470840	28311	C	T	28261	29806	N	P13L	SNP	Nucleocapsid protein	N:P13L	C28311T
EPI_ISL_470845	28311	C	T	28261	29806	N	P13L	SNP	Nucleocapsid protein	N:P13L	C28311T
EPI_ISL_470846	28311	C	T	28261	29806	N	P13L	SNP	Nucleocapsid protein	N:P13L	C28311T
EPI_ISL_470849	28311	C	T	28261	29806	N	P13L	SNP	Nucleocapsid protein	N:P13L	C28311T
EPI_ISL_470856	28311	C	T	28261	29806	N	P13L	SNP	Nucleocapsid protein	N:P13L	C28311T
EPI_ISL_470863	28311	C	T	28261	29806	N	P13L	SNP	Nucleocapsid protein	N:P13L	C28311T
EPI_ISL_470864	28311	C	T	28261	29806	N	P13L	SNP	Nucleocapsid protein	N:P13L	C28311T
EPI_ISL_470865	28311	C	T	28261	29804	N	P13L	SNP	Nucleocapsid protein	N:P13L	C28311T
EPI_ISL_470866	28311	C	T	28050	29595	N	P13L	SNP	Nucleocapsid protein	N:P13L	C28311T
EPI_ISL_470867	28311	C	T	28261	29806	N	P13L	SNP	Nucleocapsid protein	N:P13L	C28311T
EPI_ISL_470868	28311	C	T	28255	29800	N	P13L	SNP	Nucleocapsid protein	N:P13L	C28311T
EPI_ISL_470869	28311	C	T	28261	29806	N	P13L	SNP	Nucleocapsid protein	N:P13L	C28311T
EPI_ISL_470872	28311	C	T	28261	29806	N	P13L	SNP	Nucleocapsid protein	N:P13L	C28311T
EPI_ISL_469141	28311	C	T	28311	29891	N	P13L	SNP	Nucleocapsid protein	N:P13L	C28311T
EPI_ISL_434555	28311	C	T	28310	29869	N	P13L	SNP	Nucleocapsid protein	N:P13L	C28311T
EPI_ISL_463021	28311	C	T	28311	29498	N	P13L	SNP	Nucleocapsid protein	N:P13L	C28311T
EPI_ISL_455048	28311	C	T	28045	29408	N	P13L	SNP	Nucleocapsid protein	N:P13L	C28311T
EPI_ISL_463020	28311	C	T	28311	29180	N	P13L	SNP	Nucleocapsid protein	N:P13L	C28311T
EPI_ISL_467838	28311	C	T	28257	29782	N	P13L	SNP	Nucleocapsid protein	N:P13L	C28311T
EPI_ISL_467841	28311	C	T	28257	29782	N	P13L	SNP	Nucleocapsid protein	N:P13L	C28311T
EPI_ISL_454541	28311	C	T	28311	29903	N	P13L	SNP	Nucleocapsid protein	N:P13L	C28311T
EPI_ISL_427706	28311	C	T	28047	29412	N	P13L	SNP	Nucleocapsid protein	N:P13L	C28311T
EPI_ISL_456598	28311	C	T	28311	29903	N	P13L	SNP	Nucleocapsid protein	N:P13L	C28311T
EPI_ISL_420799	28311	C	T	28311	29882	N	P13L	SNP	Nucleocapsid protein	N:P13L	C28311T
EPI_ISL_420800	28311	C	T	28311	29882	N	P13L	SNP	Nucleocapsid protein	N:P13L	C28311T
EPI_ISL_420801	28311	C	T	28311	29882	N	P13L	SNP	Nucleocapsid protein	N:P13L	C28311T
EPI_ISL_454544	28311	C	T	28311	29903	N	P13L	SNP	Nucleocapsid protein	N:P13L	C28311T
EPI_ISL_435683	28311	C	T	28264	29753	N	P13L	SNP	Nucleocapsid protein	N:P13L	C28311T
EPI_ISL_443190	28311	C	T	28311	29891	N	P13L	SNP	Nucleocapsid protein	N:P13L	C28311T
EPI_ISL_462381	28311	C	T	28311	29891	N	P13L	SNP	Nucleocapsid protein	N:P13L	C28311T
EPI_ISL_447583	28311	C	T	28275	29867	N	P13L	SNP	Nucleocapsid protein	N:P13L	C28311T
EPI_ISL_427751	28311	C	T	28047	29412	N	P13L	SNP	Nucleocapsid protein	N:P13L	C28311T
EPI_ISL_457838	28311	C	T	28257	29782	N	P13L	SNP	Nucleocapsid protein	N:P13L	C28311T
EPI_ISL_462351	28311	C	T	28311	29891	N	P13L	SNP	Nucleocapsid protein	N:P13L	C28311T
EPI_ISL_435689	28311	C	T	28307	29789	N	P13L	SNP	Nucleocapsid protein	N:P13L	C28311T
EPI_ISL_447412	28311	C	T	28312	29892	N	P13L	SNP	Nucleocapsid protein	N:P13L	C28311T
EPI_ISL_447665	28311	C	T	28311	29903	N	P13L	SNP	Nucleocapsid protein	N:P13L	C28311T
EPI_ISL_437453	28311	C	T	28311	29903	N	P13L	SNP	Nucleocapsid protein	N:P13L	C28311T
EPI_ISL_447567	28311	C	T	28273	29865	N	P13L	SNP	Nucleocapsid protein	N:P13L	C28311T
EPI_ISL_447575	28311	C	T	28300	29892	N	P13L	SNP	Nucleocapsid protein	N:P13L	C28311T
EPI_ISL_447851	28311	C	T	28273	29822	N	P13L	SNP	Nucleocapsid protein	N:P13L	C28311T
EPI_ISL_447854	28311	C	T	28276	29825	N	P13L	SNP	Nucleocapsid protein	N:P13L	C28311T
EPI_ISL_447863	28311	C	T	28273	29822	N	P13L	SNP	Nucleocapsid protein	N:P13L	C28311T
EPI_ISL_450784	28311	C	T	28311	29903	N	P13L	SNP	Nucleocapsid protein	N:P13L	C28311T
EPI_ISL_422433	28311	C	T	28299	29879	N	P13L	SNP	Nucleocapsid protein	N:P13L	C28311T
EPI_ISL_417918	28311	C	T	28311	29903	N	P13L	SNP	Nucleocapsid protein	N:P13L	C28311T
EPI_ISL_419771	28311	C	T	28273	29865	N	P13L	SNP	Nucleocapsid protein	N:P13L	C28311T
EPI_ISL_422434	28311	C	T	28307	29887	N	P13L	SNP	Nucleocapsid protein	N:P13L	C28311T
EPI_ISL_422435	28311	C	T	28305	29885	N	P13L	SNP	Nucleocapsid protein	N:P13L	C28311T
EPI_ISL_426882	28311	C	T	28311	29903	N	P13L	SNP	Nucleocapsid protein	N:P13L	C28311T
EPI_ISL_426905	28311	C	T	28281	29873	N	P13L	SNP	Nucleocapsid protein	N:P13L	C28311T
EPI_ISL_427091	28311	C	T	28311	29903	N	P13L	SNP	Nucleocapsid protein	N:P13L	C28311T
EPI_ISL_427750	28311	C	T	28047	29412	N	P13L	SNP	Nucleocapsid protein	N:P13L	C28311T
EPI_ISL_428832	28311	C	T	28305	29885	N	P13L	SNP	Nucleocapsid protein	N:P13L	C28311T
EPI_ISL_428833	28311	C	T	28262	29842	N	P13L	SNP	Nucleocapsid protein	N:P13L	C28311T
EPI_ISL_428834	28311	C	T	28301	29881	N	P13L	SNP	Nucleocapsid protein	N:P13L	C28311T
EPI_ISL_428835	28311	C	T	28305	29885	N	P13L	SNP	Nucleocapsid protein	N:P13L	C28311T
EPI_ISL_428836	28311	C	T	28295	29875	N	P13L	SNP	Nucleocapsid protein	N:P13L	C28311T
EPI_ISL_428837	28311	C	T	28305	29885	N	P13L	SNP	Nucleocapsid protein	N:P13L	C28311T
EPI_ISL_428838	28311	C	T	28305	29885	N	P13L	SNP	Nucleocapsid protein	N:P13L	C28311T
EPI_ISL_428839	28311	C	T	28305	29885	N	P13L	SNP	Nucleocapsid protein	N:P13L	C28311T
EPI_ISL_428840	28311	C	T	28305	29885	N	P13L	SNP	Nucleocapsid protein	N:P13L	C28311T
EPI_ISL_428841	28311	C	T	28309	29889	N	P13L	SNP	Nucleocapsid protein	N:P13L	C28311T
EPI_ISL_428844	28311	C	T	28307	29887	N	P13L	SNP	Nucleocapsid protein	N:P13L	C28311T
EPI_ISL_428845	28311	C	T	28310	29890	N	P13L	SNP	Nucleocapsid protein	N:P13L	C28311T
EPI_ISL_428846	28311	C	T	28295	29875	N	P13L	SNP	Nucleocapsid protein	N:P13L	C28311T
EPI_ISL_428847	28311	C	T	28308	29888	N	P13L	SNP	Nucleocapsid protein	N:P13L	C28311T
EPI_ISL_428848	28311	C	T	28196	29776	N	P13L	SNP	Nucleocapsid protein	N:P13L	C28311T
EPI_ISL_428849	28311	C	T	28299	29879	N	P13L	SNP	Nucleocapsid protein	N:P13L	C28311T
EPI_ISL_428850	28311	C	T	28300	29880	N	P13L	SNP	Nucleocapsid protein	N:P13L	C28311T
EPI_ISL_430476	28311	C	T	28311	29903	N	P13L	SNP	Nucleocapsid protein	N:P13L	C28311T
EPI_ISL_430654	28311	C	T	28311	29903	N	P13L	SNP	Nucleocapsid protein	N:P13L	C28311T
EPI_ISL_435678	28311	C	T	28241	29757	N	P13L	SNP	Nucleocapsid protein	N:P13L	C28311T
EPI_ISL_435679	28311	C	T	28294	29687	N	P13L	SNP	Nucleocapsid protein	N:P13L	C28311T
EPI_ISL_435680	28311	C	T	28226	29683	N	P13L	SNP	Nucleocapsid protein	N:P13L	C28311T
EPI_ISL_435681	28311	C	T	28299	29687	N	P13L	SNP	Nucleocapsid protein	N:P13L	C28311T
EPI_ISL_435682	28311	C	T	28214	29568	N	P13L	SNP	Nucleocapsid protein	N:P13L	C28311T
EPI_ISL_435684	28311	C	T	28282	29833	N	P13L	SNP	Nucleocapsid protein	N:P13L	C28311T
EPI_ISL_435685	28311	C	T	28294	29845	N	P13L	SNP	Nucleocapsid protein	N:P13L	C28311T
EPI_ISL_435687	28311	C	T	28272	29808	N	P13L	SNP	Nucleocapsid protein	N:P13L	C28311T
EPI_ISL_435688	28311	C	T	28262	29797	N	P13L	SNP	Nucleocapsid protein	N:P13L	C28311T
EPI_ISL_435690	28311	C	T	28272	29714	N	P13L	SNP	Nucleocapsid protein	N:P13L	C28311T
EPI_ISL_435691	28311	C	T	28212	29633	N	P13L	SNP	Nucleocapsid protein	N:P13L	C28311T
EPI_ISL_435692	28311	C	T	28294	29839	N	P13L	SNP	Nucleocapsid protein	N:P13L	C28311T
EPI_ISL_435693	28311	C	T	28294	29712	N	P13L	SNP	Nucleocapsid protein	N:P13L	C28311T
EPI_ISL_435694	28311	C	T	28273	29748	N	P13L	SNP	Nucleocapsid protein	N:P13L	C28311T
EPI_ISL_435696	28311	C	T	28273	29648	N	P13L	SNP	Nucleocapsid protein	N:P13L	C28311T
EPI_ISL_436422	28311	C	T	28311	29866	N	P13L	SNP	Nucleocapsid protein	N:P13L	C28311T
EPI_ISL_436424	28311	C	T	28311	29866	N	P13L	SNP	Nucleocapsid protein	N:P13L	C28311T
EPI_ISL_436426	28311	C	T	28311	29866	N	P13L	SNP	Nucleocapsid protein	N:P13L	C28311T
EPI_ISL_436448	28311	C	T	28311	29874	N	P13L	SNP	Nucleocapsid protein	N:P13L	C28311T
EPI_ISL_436449	28311	C	T	28311	29868	N	P13L	SNP	Nucleocapsid protein	N:P13L	C28311T
EPI_ISL_438139	28311	C	T	28312	29904	N	P13L	SNP	Nucleocapsid protein	N:P13L	C28311T
EPI_ISL_443192	28311	C	T	28311	29891	N	P13L	SNP	Nucleocapsid protein	N:P13L	C28311T
EPI_ISL_443213	28311	C	T	28311	29891	N	P13L	SNP	Nucleocapsid protein	N:P13L	C28311T
EPI_ISL_443216	28311	C	T	28311	29891	N	P13L	SNP	Nucleocapsid protein	N:P13L	C28311T
EPI_ISL_443227	28311	C	T	28311	29891	N	P13L	SNP	Nucleocapsid protein	N:P13L	C28311T
EPI_ISL_443241	28311	C	T	28311	29891	N	P13L	SNP	Nucleocapsid protein	N:P13L	C28311T
EPI_ISL_443244	28311	C	T	28311	29891	N	P13L	SNP	Nucleocapsid protein	N:P13L	C28311T
EPI_ISL_443245	28311	C	T	28311	29891	N	P13L	SNP	Nucleocapsid protein	N:P13L	C28311T
EPI_ISL_443246	28311	C	T	28311	29891	N	P13L	SNP	Nucleocapsid protein	N:P13L	C28311T
EPI_ISL_443247	28311	C	T	28311	29891	N	P13L	SNP	Nucleocapsid protein	N:P13L	C28311T
EPI_ISL_443248	28311	C	T	28311	29891	N	P13L	SNP	Nucleocapsid protein	N:P13L	C28311T
EPI_ISL_447577	28311	C	T	28273	29865	N	P13L	SNP	Nucleocapsid protein	N:P13L	C28311T
EPI_ISL_447857	28311	C	T	28273	29822	N	P13L	SNP	Nucleocapsid protein	N:P13L	C28311T
EPI_ISL_452209	28311	C	T	28286	29805	N	P13L	SNP	Nucleocapsid protein	N:P13L	C28311T
EPI_ISL_452795	28311	C	T	28309	29864	N	P13L	SNP	Nucleocapsid protein	N:P13L	C28311T
EPI_ISL_454547	28311	C	T	28311	29903	N	P13L	SNP	Nucleocapsid protein	N:P13L	C28311T
EPI_ISL_455641	28311	C	T	28311	29903	N	P13L	SNP	Nucleocapsid protein	N:P13L	C28311T
EPI_ISL_462276	28311	C	T	28311	29887	N	P13L	SNP	Nucleocapsid protein	N:P13L	C28311T
EPI_ISL_462281	28311	C	T	28311	29891	N	P13L	SNP	Nucleocapsid protein	N:P13L	C28311T
EPI_ISL_462286	28311	C	T	28311	29883	N	P13L	SNP	Nucleocapsid protein	N:P13L	C28311T
EPI_ISL_462288	28311	C	T	28311	29891	N	P13L	SNP	Nucleocapsid protein	N:P13L	C28311T
EPI_ISL_462289	28311	C	T	28311	29891	N	P13L	SNP	Nucleocapsid protein	N:P13L	C28311T
EPI_ISL_462302	28311	C	T	28311	29891	N	P13L	SNP	Nucleocapsid protein	N:P13L	C28311T
EPI_ISL_462303	28311	C	T	28311	29891	N	P13L	SNP	Nucleocapsid protein	N:P13L	C28311T
EPI_ISL_462307	28311	C	T	28311	29891	N	P13L	SNP	Nucleocapsid protein	N:P13L	C28311T
EPI_ISL_462310	28311	C	T	28311	29891	N	P13L	SNP	Nucleocapsid protein	N:P13L	C28311T
EPI_ISL_462311	28311	C	T	28311	29891	N	P13L	SNP	Nucleocapsid protein	N:P13L	C28311T
EPI_ISL_462312	28311	C	T	28311	29891	N	P13L	SNP	Nucleocapsid protein	N:P13L	C28311T
EPI_ISL_462313	28311	C	T	28311	29891	N	P13L	SNP	Nucleocapsid protein	N:P13L	C28311T
EPI_ISL_462315	28311	C	T	28311	29891	N	P13L	SNP	Nucleocapsid protein	N:P13L	C28311T
EPI_ISL_462316	28311	C	T	28311	29891	N	P13L	SNP	Nucleocapsid protein	N:P13L	C28311T
EPI_ISL_462317	28311	C	T	28311	29891	N	P13L	SNP	Nucleocapsid protein	N:P13L	C28311T
EPI_ISL_462321	28311	C	T	28311	29891	N	P13L	SNP	Nucleocapsid protein	N:P13L	C28311T
EPI_ISL_462323	28311	C	T	28311	29891	N	P13L	SNP	Nucleocapsid protein	N:P13L	C28311T
EPI_ISL_462324	28311	C	T	28311	29891	N	P13L	SNP	Nucleocapsid protein	N:P13L	C28311T
EPI_ISL_462325	28311	C	T	28311	29891	N	P13L	SNP	Nucleocapsid protein	N:P13L	C28311T
EPI_ISL_462331	28311	C	T	28311	29891	N	P13L	SNP	Nucleocapsid protein	N:P13L	C28311T
EPI_ISL_462336	28311	C	T	28311	29891	N	P13L	SNP	Nucleocapsid protein	N:P13L	C28311T
EPI_ISL_462337	28311	C	T	28311	29891	N	P13L	SNP	Nucleocapsid protein	N:P13L	C28311T
EPI_ISL_462341	28311	C	T	28311	29891	N	P13L	SNP	Nucleocapsid protein	N:P13L	C28311T
EPI_ISL_462344	28311	C	T	28311	29891	N	P13L	SNP	Nucleocapsid protein	N:P13L	C28311T
EPI_ISL_462345	28311	C	T	28311	29891	N	P13L	SNP	Nucleocapsid protein	N:P13L	C28311T
EPI_ISL_462346	28311	C	T	28311	29891	N	P13L	SNP	Nucleocapsid protein	N:P13L	C28311T
EPI_ISL_462347	28311	C	T	28311	29891	N	P13L	SNP	Nucleocapsid protein	N:P13L	C28311T
EPI_ISL_462352	28311	C	T	28311	29891	N	P13L	SNP	Nucleocapsid protein	N:P13L	C28311T
EPI_ISL_462354	28311	C	T	28311	29891	N	P13L	SNP	Nucleocapsid protein	N:P13L	C28311T
EPI_ISL_462355	28311	C	T	28311	29891	N	P13L	SNP	Nucleocapsid protein	N:P13L	C28311T
EPI_ISL_462356	28311	C	T	28311	29891	N	P13L	SNP	Nucleocapsid protein	N:P13L	C28311T
EPI_ISL_462360	28311	C	T	28311	29891	N	P13L	SNP	Nucleocapsid protein	N:P13L	C28311T
EPI_ISL_462361	28311	C	T	28311	29891	N	P13L	SNP	Nucleocapsid protein	N:P13L	C28311T
EPI_ISL_462362	28311	C	T	28311	29891	N	P13L	SNP	Nucleocapsid protein	N:P13L	C28311T
EPI_ISL_462365	28311	C	T	28311	29891	N	P13L	SNP	Nucleocapsid protein	N:P13L	C28311T
EPI_ISL_462372	28311	C	T	28311	29891	N	P13L	SNP	Nucleocapsid protein	N:P13L	C28311T
EPI_ISL_462374	28311	C	T	28311	29891	N	P13L	SNP	Nucleocapsid protein	N:P13L	C28311T
EPI_ISL_462375	28311	C	T	28311	29891	N	P13L	SNP	Nucleocapsid protein	N:P13L	C28311T
EPI_ISL_462377	28311	C	T	28311	29891	N	P13L	SNP	Nucleocapsid protein	N:P13L	C28311T
EPI_ISL_462378	28311	C	T	28311	29891	N	P13L	SNP	Nucleocapsid protein	N:P13L	C28311T
EPI_ISL_462380	28311	C	T	28311	29891	N	P13L	SNP	Nucleocapsid protein	N:P13L	C28311T
EPI_ISL_462384	28311	C	T	28311	29891	N	P13L	SNP	Nucleocapsid protein	N:P13L	C28311T
EPI_ISL_462388	28311	C	T	28311	29891	N	P13L	SNP	Nucleocapsid protein	N:P13L	C28311T
EPI_ISL_462393	28311	C	T	28311	29891	N	P13L	SNP	Nucleocapsid protein	N:P13L	C28311T
EPI_ISL_462395	28311	C	T	28311	29891	N	P13L	SNP	Nucleocapsid protein	N:P13L	C28311T
EPI_ISL_462397	28311	C	T	28311	29891	N	P13L	SNP	Nucleocapsid protein	N:P13L	C28311T
EPI_ISL_462399	28311	C	T	28311	29891	N	P13L	SNP	Nucleocapsid protein	N:P13L	C28311T
EPI_ISL_462400	28311	C	T	28311	29891	N	P13L	SNP	Nucleocapsid protein	N:P13L	C28311T
EPI_ISL_462402	28311	C	T	28311	29891	N	P13L	SNP	Nucleocapsid protein	N:P13L	C28311T
EPI_ISL_462403	28311	C	T	28311	29891	N	P13L	SNP	Nucleocapsid protein	N:P13L	C28311T
EPI_ISL_462406	28311	C	T	28311	29891	N	P13L	SNP	Nucleocapsid protein	N:P13L	C28311T
EPI_ISL_462407	28311	C	T	28311	29891	N	P13L	SNP	Nucleocapsid protein	N:P13L	C28311T
EPI_ISL_462408	28311	C	T	28311	29891	N	P13L	SNP	Nucleocapsid protein	N:P13L	C28311T
EPI_ISL_462417	28311	C	T	28311	29891	N	P13L	SNP	Nucleocapsid protein	N:P13L	C28311T
EPI_ISL_462425	28311	C	T	28311	29891	N	P13L	SNP	Nucleocapsid protein	N:P13L	C28311T
EPI_ISL_462426	28311	C	T	28311	29891	N	P13L	SNP	Nucleocapsid protein	N:P13L	C28311T
EPI_ISL_462428	28311	C	T	28311	29891	N	P13L	SNP	Nucleocapsid protein	N:P13L	C28311T
EPI_ISL_469080	28311	C	T	28311	29891	N	P13L	SNP	Nucleocapsid protein	N:P13L	C28311T
EPI_ISL_469081	28311	C	T	28311	29891	N	P13L	SNP	Nucleocapsid protein	N:P13L	C28311T
EPI_ISL_469082	28311	C	T	28311	29891	N	P13L	SNP	Nucleocapsid protein	N:P13L	C28311T
EPI_ISL_469083	28311	C	T	28311	29891	N	P13L	SNP	Nucleocapsid protein	N:P13L	C28311T
EPI_ISL_469084	28311	C	T	28311	29891	N	P13L	SNP	Nucleocapsid protein	N:P13L	C28311T
EPI_ISL_469085	28311	C	T	28311	29891	N	P13L	SNP	Nucleocapsid protein	N:P13L	C28311T
EPI_ISL_469086	28311	C	T	28311	29891	N	P13L	SNP	Nucleocapsid protein	N:P13L	C28311T
EPI_ISL_469087	28311	C	T	28311	29891	N	P13L	SNP	Nucleocapsid protein	N:P13L	C28311T
EPI_ISL_469088	28311	C	T	28311	29891	N	P13L	SNP	Nucleocapsid protein	N:P13L	C28311T
EPI_ISL_469090	28311	C	T	28311	29891	N	P13L	SNP	Nucleocapsid protein	N:P13L	C28311T
EPI_ISL_469092	28311	C	T	28311	29891	N	P13L	SNP	Nucleocapsid protein	N:P13L	C28311T
EPI_ISL_469094	28311	C	T	28311	29891	N	P13L	SNP	Nucleocapsid protein	N:P13L	C28311T
EPI_ISL_469098	28311	C	T	28311	29891	N	P13L	SNP	Nucleocapsid protein	N:P13L	C28311T
EPI_ISL_469099	28311	C	T	28311	29891	N	P13L	SNP	Nucleocapsid protein	N:P13L	C28311T
EPI_ISL_469101	28311	C	T	28311	29891	N	P13L	SNP	Nucleocapsid protein	N:P13L	C28311T
EPI_ISL_469103	28311	C	T	28311	29891	N	P13L	SNP	Nucleocapsid protein	N:P13L	C28311T
EPI_ISL_469104	28311	C	T	28311	29891	N	P13L	SNP	Nucleocapsid protein	N:P13L	C28311T
EPI_ISL_469105	28311	C	T	28311	29891	N	P13L	SNP	Nucleocapsid protein	N:P13L	C28311T
EPI_ISL_469107	28311	C	T	28311	29891	N	P13L	SNP	Nucleocapsid protein	N:P13L	C28311T
EPI_ISL_469109	28311	C	T	28311	29891	N	P13L	SNP	Nucleocapsid protein	N:P13L	C28311T
EPI_ISL_469111	28311	C	T	28311	29891	N	P13L	SNP	Nucleocapsid protein	N:P13L	C28311T
EPI_ISL_469114	28311	C	T	28311	29891	N	P13L	SNP	Nucleocapsid protein	N:P13L	C28311T
EPI_ISL_469117	28311	C	T	28311	29891	N	P13L	SNP	Nucleocapsid protein	N:P13L	C28311T
EPI_ISL_469118	28311	C	T	28311	29891	N	P13L	SNP	Nucleocapsid protein	N:P13L	C28311T
EPI_ISL_469119	28311	C	T	28311	29891	N	P13L	SNP	Nucleocapsid protein	N:P13L	C28311T
EPI_ISL_469120	28311	C	T	28311	29891	N	P13L	SNP	Nucleocapsid protein	N:P13L	C28311T
EPI_ISL_469121	28311	C	T	28311	29891	N	P13L	SNP	Nucleocapsid protein	N:P13L	C28311T
EPI_ISL_469122	28311	C	T	28311	29891	N	P13L	SNP	Nucleocapsid protein	N:P13L	C28311T
EPI_ISL_469128	28311	C	T	28311	29891	N	P13L	SNP	Nucleocapsid protein	N:P13L	C28311T
EPI_ISL_469130	28311	C	T	28311	29891	N	P13L	SNP	Nucleocapsid protein	N:P13L	C28311T
EPI_ISL_469133	28311	C	T	28311	29891	N	P13L	SNP	Nucleocapsid protein	N:P13L	C28311T
EPI_ISL_469134	28311	C	T	28311	29891	N	P13L	SNP	Nucleocapsid protein	N:P13L	C28311T
EPI_ISL_469135	28311	C	T	28311	29891	N	P13L	SNP	Nucleocapsid protein	N:P13L	C28311T
EPI_ISL_469137	28311	C	T	28311	29891	N	P13L	SNP	Nucleocapsid protein	N:P13L	C28311T
EPI_ISL_469139	28311	C	T	28311	29891	N	P13L	SNP	Nucleocapsid protein	N:P13L	C28311T
EPI_ISL_469142	28311	C	T	28311	29891	N	P13L	SNP	Nucleocapsid protein	N:P13L	C28311T
EPI_ISL_469146	28311	C	T	28311	29891	N	P13L	SNP	Nucleocapsid protein	N:P13L	C28311T
EPI_ISL_469147	28311	C	T	28311	29843	N	P13L	SNP	Nucleocapsid protein	N:P13L	C28311T
EPI_ISL_469149	28311	C	T	28311	29891	N	P13L	SNP	Nucleocapsid protein	N:P13L	C28311T
EPI_ISL_469150	28311	C	T	28311	29891	N	P13L	SNP	Nucleocapsid protein	N:P13L	C28311T
EPI_ISL_469151	28311	C	T	28311	29891	N	P13L	SNP	Nucleocapsid protein	N:P13L	C28311T
EPI_ISL_469153	28311	C	T	28311	29891	N	P13L	SNP	Nucleocapsid protein	N:P13L	C28311T
EPI_ISL_469155	28311	C	T	28311	29891	N	P13L	SNP	Nucleocapsid protein	N:P13L	C28311T
EPI_ISL_469274	28311	C	T	28285	29802	N	P13L	SNP	Nucleocapsid protein	N:P13L	C28311T
EPI_ISL_416432	28311	C	T	28317	29843	N	P13L	SNP	Nucleocapsid protein	N:P13L	C28311T
EPI_ISL_416706	28311	C	T	28237	29788	N	P13L	SNP	Nucleocapsid protein	N:P13L	C28311T
EPI_ISL_417033	28311	C	T	28306	29865	N	P13L	SNP	Nucleocapsid protein	N:P13L	C28311T
EPI_ISL_417388	28311	C	T	28257	29782	N	P13L	SNP	Nucleocapsid protein	N:P13L	C28311T
EPI_ISL_417396	28311	C	T	28046	29409	N	P13L	SNP	Nucleocapsid protein	N:P13L	C28311T
EPI_ISL_417400	28311	C	T	28046	29409	N	P13L	SNP	Nucleocapsid protein	N:P13L	C28311T
EPI_ISL_417401	28311	C	T	28046	29409	N	P13L	SNP	Nucleocapsid protein	N:P13L	C28311T
EPI_ISL_417403	28311	C	T	28046	29409	N	P13L	SNP	Nucleocapsid protein	N:P13L	C28311T
EPI_ISL_418375	28311	C	T	28310	29881	N	P13L	SNP	Nucleocapsid protein	N:P13L	C28311T
EPI_ISL_418376	28311	C	T	28310	29881	N	P13L	SNP	Nucleocapsid protein	N:P13L	C28311T
EPI_ISL_419761	28311	C	T	28286	29878	N	P13L	SNP	Nucleocapsid protein	N:P13L	C28311T
EPI_ISL_419878	28311	C	T	28311	29903	N	P13L	SNP	Nucleocapsid protein	N:P13L	C28311T
EPI_ISL_419884	28311	C	T	28273	29865	N	P13L	SNP	Nucleocapsid protein	N:P13L	C28311T
EPI_ISL_419926	28311	C	T	28307	29899	N	P13L	SNP	Nucleocapsid protein	N:P13L	C28311T
EPI_ISL_419969	28311	C	T	28299	29891	N	P13L	SNP	Nucleocapsid protein	N:P13L	C28311T
EPI_ISL_421573	28311	C	T	28311	29903	N	P13L	SNP	Nucleocapsid protein	N:P13L	C28311T
EPI_ISL_421780	28311	C	T	28311	29903	N	P13L	SNP	Nucleocapsid protein	N:P13L	C28311T
EPI_ISL_426379	28311	C	T	28293	29887	N	P13L	SNP	Nucleocapsid protein	N:P13L	C28311T
EPI_ISL_426418	28311	C	T	28311	29882	N	P13L	SNP	Nucleocapsid protein	N:P13L	C28311T
EPI_ISL_426754	28311	C	T	28311	29903	N	P13L	SNP	Nucleocapsid protein	N:P13L	C28311T
EPI_ISL_426973	28311	C	T	28311	29903	N	P13L	SNP	Nucleocapsid protein	N:P13L	C28311T
EPI_ISL_427044	28311	C	T	28311	29903	N	P13L	SNP	Nucleocapsid protein	N:P13L	C28311T
EPI_ISL_427045	28311	C	T	28311	29903	N	P13L	SNP	Nucleocapsid protein	N:P13L	C28311T
EPI_ISL_427048	28311	C	T	28311	29903	N	P13L	SNP	Nucleocapsid protein	N:P13L	C28311T
EPI_ISL_427049	28311	C	T	28311	29903	N	P13L	SNP	Nucleocapsid protein	N:P13L	C28311T
EPI_ISL_427305	28311	C	T	28272	29751	N	P13L	SNP	Nucleocapsid protein	N:P13L	C28311T
EPI_ISL_427398	28311	C	T	28311	30012	N	P13L	SNP	Nucleocapsid protein	N:P13L	C28311T
EPI_ISL_427659	28311	C	T	28047	29412	N	P13L	SNP	Nucleocapsid protein	N:P13L	C28311T
EPI_ISL_427662	28311	C	T	28047	29412	N	P13L	SNP	Nucleocapsid protein	N:P13L	C28311T
EPI_ISL_427705	28311	C	T	28047	29412	N	P13L	SNP	Nucleocapsid protein	N:P13L	C28311T
EPI_ISL_427733	28311	C	T	28047	29412	N	P13L	SNP	Nucleocapsid protein	N:P13L	C28311T
EPI_ISL_427744	28311	C	T	28047	29412	N	P13L	SNP	Nucleocapsid protein	N:P13L	C28311T
EPI_ISL_427757	28311	C	T	28047	29412	N	P13L	SNP	Nucleocapsid protein	N:P13L	C28311T
EPI_ISL_427759	28311	C	T	28047	29412	N	P13L	SNP	Nucleocapsid protein	N:P13L	C28311T
EPI_ISL_428483	28311	C	T	28284	29839	N	P13L	SNP	Nucleocapsid protein	N:P13L	C28311T
EPI_ISL_428486	28311	C	T	28284	29839	N	P13L	SNP	Nucleocapsid protein	N:P13L	C28311T
EPI_ISL_428487	28311	C	T	28283	29838	N	P13L	SNP	Nucleocapsid protein	N:P13L	C28311T
EPI_ISL_428826	28311	C	T	28307	29887	N	P13L	SNP	Nucleocapsid protein	N:P13L	C28311T
EPI_ISL_428856	28311	C	T	28311	29903	N	P13L	SNP	Nucleocapsid protein	N:P13L	C28311T
EPI_ISL_429062	28311	C	T	28308	29900	N	P13L	SNP	Nucleocapsid protein	N:P13L	C28311T
EPI_ISL_429807	28311	C	T	28257	29782	N	P13L	SNP	Nucleocapsid protein	N:P13L	C28311T
EPI_ISL_429882	28311	C	T	28311	29891	N	P13L	SNP	Nucleocapsid protein	N:P13L	C28311T
EPI_ISL_429884	28311	C	T	28311	29891	N	P13L	SNP	Nucleocapsid protein	N:P13L	C28311T
EPI_ISL_430471	28311	C	T	28311	29903	N	P13L	SNP	Nucleocapsid protein	N:P13L	C28311T
EPI_ISL_430521	28311	C	T	28311	29903	N	P13L	SNP	Nucleocapsid protein	N:P13L	C28311T
EPI_ISL_431103	28311	C	T	28311	29903	N	P13L	SNP	Nucleocapsid protein	N:P13L	C28311T
EPI_ISL_434297	28311	C	T	28311	29903	N	P13L	SNP	Nucleocapsid protein	N:P13L	C28311T
EPI_ISL_434554	28311	C	T	28348	29981	N	P13L	SNP	Nucleocapsid protein	N:P13L	C28311T
EPI_ISL_434558	28311	C	T	28310	29869	N	P13L	SNP	Nucleocapsid protein	N:P13L	C28311T
EPI_ISL_435074	28311	C	T	28296	29811	N	P13L	SNP	Nucleocapsid protein	N:P13L	C28311T
EPI_ISL_435081	28311	C	T	28311	29867	N	P13L	SNP	Nucleocapsid protein	N:P13L	C28311T
EPI_ISL_435083	28311	C	T	28311	29866	N	P13L	SNP	Nucleocapsid protein	N:P13L	C28311T
EPI_ISL_435084	28311	C	T	28311	29866	N	P13L	SNP	Nucleocapsid protein	N:P13L	C28311T
EPI_ISL_435085	28311	C	T	28311	29866	N	P13L	SNP	Nucleocapsid protein	N:P13L	C28311T
EPI_ISL_435086	28311	C	T	28311	29867	N	P13L	SNP	Nucleocapsid protein	N:P13L	C28311T
EPI_ISL_435092	28311	C	T	28311	29866	N	P13L	SNP	Nucleocapsid protein	N:P13L	C28311T
EPI_ISL_435093	28311	C	T	28311	29866	N	P13L	SNP	Nucleocapsid protein	N:P13L	C28311T
EPI_ISL_435094	28311	C	T	28311	29866	N	P13L	SNP	Nucleocapsid protein	N:P13L	C28311T
EPI_ISL_435095	28311	C	T	28311	29866	N	P13L	SNP	Nucleocapsid protein	N:P13L	C28311T
EPI_ISL_435096	28311	C	T	28311	29866	N	P13L	SNP	Nucleocapsid protein	N:P13L	C28311T
EPI_ISL_435097	28311	C	T	28311	29866	N	P13L	SNP	Nucleocapsid protein	N:P13L	C28311T
EPI_ISL_435098	28311	C	T	28311	29866	N	P13L	SNP	Nucleocapsid protein	N:P13L	C28311T
EPI_ISL_435099	28311	C	T	28311	29873	N	P13L	SNP	Nucleocapsid protein	N:P13L	C28311T
EPI_ISL_435100	28311	C	T	28311	29866	N	P13L	SNP	Nucleocapsid protein	N:P13L	C28311T
EPI_ISL_435112	28311	C	T	28311	29866	N	P13L	SNP	Nucleocapsid protein	N:P13L	C28311T
EPI_ISL_435663	28311	C	T	28311	29903	N	P13L	SNP	Nucleocapsid protein	N:P13L	C28311T
EPI_ISL_435676	28311	C	T	28307	29887	N	P13L	SNP	Nucleocapsid protein	N:P13L	C28311T
EPI_ISL_435677	28311	C	T	28255	29835	N	P13L	SNP	Nucleocapsid protein	N:P13L	C28311T
EPI_ISL_436415	28311	C	T	28311	29874	N	P13L	SNP	Nucleocapsid protein	N:P13L	C28311T
EPI_ISL_436417	28311	C	T	28311	29870	N	P13L	SNP	Nucleocapsid protein	N:P13L	C28311T
EPI_ISL_436418	28311	C	T	28311	29866	N	P13L	SNP	Nucleocapsid protein	N:P13L	C28311T
EPI_ISL_436419	28311	C	T	28311	29869	N	P13L	SNP	Nucleocapsid protein	N:P13L	C28311T
EPI_ISL_436420	28311	C	T	28311	29866	N	P13L	SNP	Nucleocapsid protein	N:P13L	C28311T
EPI_ISL_436428	28311	C	T	28311	29866	N	P13L	SNP	Nucleocapsid protein	N:P13L	C28311T
EPI_ISL_436431	28311	C	T	28311	29866	N	P13L	SNP	Nucleocapsid protein	N:P13L	C28311T
EPI_ISL_436432	28311	C	T	28311	29868	N	P13L	SNP	Nucleocapsid protein	N:P13L	C28311T
EPI_ISL_436441	28311	C	T	28311	29866	N	P13L	SNP	Nucleocapsid protein	N:P13L	C28311T
EPI_ISL_436444	28311	C	T	28311	29866	N	P13L	SNP	Nucleocapsid protein	N:P13L	C28311T
EPI_ISL_436447	28311	C	T	28311	29873	N	P13L	SNP	Nucleocapsid protein	N:P13L	C28311T
EPI_ISL_436452	28311	C	T	28311	29866	N	P13L	SNP	Nucleocapsid protein	N:P13L	C28311T
EPI_ISL_436689	28311	C	T	28311	29903	N	P13L	SNP	Nucleocapsid protein	N:P13L	C28311T
EPI_ISL_437444	28311	C	T	28311	29903	N	P13L	SNP	Nucleocapsid protein	N:P13L	C28311T
EPI_ISL_437582	28311	C	T	28311	29903	N	P13L	SNP	Nucleocapsid protein	N:P13L	C28311T
EPI_ISL_438138	28311	C	T	28311	29903	N	P13L	SNP	Nucleocapsid protein	N:P13L	C28311T
EPI_ISL_441887	28311	C	T	28311	29903	N	P13L	SNP	Nucleocapsid protein	N:P13L	C28311T
EPI_ISL_441888	28311	C	T	28311	29903	N	P13L	SNP	Nucleocapsid protein	N:P13L	C28311T
EPI_ISL_443191	28311	C	T	28311	29891	N	P13L	SNP	Nucleocapsid protein	N:P13L	C28311T
EPI_ISL_443195	28311	C	T	28311	29891	N	P13L	SNP	Nucleocapsid protein	N:P13L	C28311T
EPI_ISL_443203	28311	C	T	28311	29891	N	P13L	SNP	Nucleocapsid protein	N:P13L	C28311T
EPI_ISL_443232	28311	C	T	28311	29891	N	P13L	SNP	Nucleocapsid protein	N:P13L	C28311T
EPI_ISL_444998	28311	C	T	28311	29903	N	P13L	SNP	Nucleocapsid protein	N:P13L	C28311T
EPI_ISL_444999	28311	C	T	28311	29903	N	P13L	SNP	Nucleocapsid protein	N:P13L	C28311T
EPI_ISL_445000	28311	C	T	28298	29890	N	P13L	SNP	Nucleocapsid protein	N:P13L	C28311T
EPI_ISL_447556	28311	C	T	28294	29851	N	P13L	SNP	Nucleocapsid protein	N:P13L	C28311T
EPI_ISL_447557	28311	C	T	28273	29865	N	P13L	SNP	Nucleocapsid protein	N:P13L	C28311T
EPI_ISL_447560	28311	C	T	28272	29864	N	P13L	SNP	Nucleocapsid protein	N:P13L	C28311T
EPI_ISL_447562	28311	C	T	28266	29858	N	P13L	SNP	Nucleocapsid protein	N:P13L	C28311T
EPI_ISL_447563	28311	C	T	28276	29868	N	P13L	SNP	Nucleocapsid protein	N:P13L	C28311T
EPI_ISL_447564	28311	C	T	28298	29890	N	P13L	SNP	Nucleocapsid protein	N:P13L	C28311T
EPI_ISL_447566	28311	C	T	28284	29876	N	P13L	SNP	Nucleocapsid protein	N:P13L	C28311T
EPI_ISL_447571	28311	C	T	28273	29865	N	P13L	SNP	Nucleocapsid protein	N:P13L	C28311T
EPI_ISL_447574	28311	C	T	28281	29834	N	P13L	SNP	Nucleocapsid protein	N:P13L	C28311T
EPI_ISL_447578	28311	C	T	28276	29868	N	P13L	SNP	Nucleocapsid protein	N:P13L	C28311T
EPI_ISL_447580	28311	C	T	28281	29834	N	P13L	SNP	Nucleocapsid protein	N:P13L	C28311T
EPI_ISL_447582	28311	C	T	28273	29865	N	P13L	SNP	Nucleocapsid protein	N:P13L	C28311T
EPI_ISL_447848	28311	C	T	28282	29831	N	P13L	SNP	Nucleocapsid protein	N:P13L	C28311T
EPI_ISL_447850	28311	C	T	28273	29822	N	P13L	SNP	Nucleocapsid protein	N:P13L	C28311T
EPI_ISL_447856	28311	C	T	28273	29822	N	P13L	SNP	Nucleocapsid protein	N:P13L	C28311T
EPI_ISL_447860	28311	C	T	28281	29834	N	P13L	SNP	Nucleocapsid protein	N:P13L	C28311T
EPI_ISL_447861	28311	C	T	28281	29834	N	P13L	SNP	Nucleocapsid protein	N:P13L	C28311T
EPI_ISL_448412	28311	C	T	28311	29903	N	P13L	SNP	Nucleocapsid protein	N:P13L	C28311T
EPI_ISL_450214	28311	C	T	28272	29812	N	P13L	SNP	Nucleocapsid protein	N:P13L	C28311T
EPI_ISL_450322	28311	C	T	28273	29821	N	P13L	SNP	Nucleocapsid protein	N:P13L	C28311T
EPI_ISL_450327	28311	C	T	28311	29859	N	P13L	SNP	Nucleocapsid protein	N:P13L	C28311T
EPI_ISL_450328	28311	C	T	28281	29834	N	P13L	SNP	Nucleocapsid protein	N:P13L	C28311T
EPI_ISL_450329	28311	C	T	28281	29834	N	P13L	SNP	Nucleocapsid protein	N:P13L	C28311T
EPI_ISL_450330	28311	C	T	28282	29830	N	P13L	SNP	Nucleocapsid protein	N:P13L	C28311T
EPI_ISL_450331	28311	C	T	28288	29836	N	P13L	SNP	Nucleocapsid protein	N:P13L	C28311T
EPI_ISL_450480	28311	C	T	28311	29903	N	P13L	SNP	Nucleocapsid protein	N:P13L	C28311T
EPI_ISL_450794	28311	C	T	28311	29882	N	P13L	SNP	Nucleocapsid protein	N:P13L	C28311T
EPI_ISL_451511	28311	C	T	28045	29408	N	P13L	SNP	Nucleocapsid protein	N:P13L	C28311T
EPI_ISL_451536	28311	C	T	28045	29408	N	P13L	SNP	Nucleocapsid protein	N:P13L	C28311T
EPI_ISL_451578	28311	C	T	28045	29408	N	P13L	SNP	Nucleocapsid protein	N:P13L	C28311T
EPI_ISL_452206	28311	C	T	28239	29758	N	P13L	SNP	Nucleocapsid protein	N:P13L	C28311T
EPI_ISL_452208	28311	C	T	28286	29805	N	P13L	SNP	Nucleocapsid protein	N:P13L	C28311T
EPI_ISL_452328	28311	C	T	28311	29903	N	P13L	SNP	Nucleocapsid protein	N:P13L	C28311T
EPI_ISL_454540	28311	C	T	28311	29903	N	P13L	SNP	Nucleocapsid protein	N:P13L	C28311T
EPI_ISL_454542	28311	C	T	28311	29903	N	P13L	SNP	Nucleocapsid protein	N:P13L	C28311T
EPI_ISL_454546	28311	C	T	28311	29903	N	P13L	SNP	Nucleocapsid protein	N:P13L	C28311T
EPI_ISL_454551	28311	C	T	28311	29903	N	P13L	SNP	Nucleocapsid protein	N:P13L	C28311T
EPI_ISL_454830	28311	C	T	28311	29878	N	P13L	SNP	Nucleocapsid protein	N:P13L	C28311T
EPI_ISL_454832	28311	C	T	28311	29877	N	P13L	SNP	Nucleocapsid protein	N:P13L	C28311T
EPI_ISL_454833	28311	C	T	28311	29865	N	P13L	SNP	Nucleocapsid protein	N:P13L	C28311T
EPI_ISL_454858	28311	C	T	28311	29903	N	P13L	SNP	Nucleocapsid protein	N:P13L	C28311T
EPI_ISL_454859	28311	C	T	28311	29903	N	P13L	SNP	Nucleocapsid protein	N:P13L	C28311T
EPI_ISL_454860	28311	C	T	28311	29903	N	P13L	SNP	Nucleocapsid protein	N:P13L	C28311T
EPI_ISL_454861	28311	C	T	28311	29903	N	P13L	SNP	Nucleocapsid protein	N:P13L	C28311T
EPI_ISL_454862	28311	C	T	28311	29903	N	P13L	SNP	Nucleocapsid protein	N:P13L	C28311T
EPI_ISL_454866	28311	C	T	28311	29903	N	P13L	SNP	Nucleocapsid protein	N:P13L	C28311T
EPI_ISL_454867	28311	C	T	28311	29903	N	P13L	SNP	Nucleocapsid protein	N:P13L	C28311T
EPI_ISL_455312	28311	C	T	28311	29903	N	P13L	SNP	Nucleocapsid protein	N:P13L	C28311T
EPI_ISL_455719	28311	C	T	28311	29903	N	P13L	SNP	Nucleocapsid protein	N:P13L	C28311T
EPI_ISL_455750	28311	C	T	28311	29055	N	P13L	SNP	Nucleocapsid protein	N:P13L	C28311T
EPI_ISL_455768	28311	C	T	28311	29685	N	P13L	SNP	Nucleocapsid protein	N:P13L	C28311T
EPI_ISL_455910	28311	C	T	28310	29902	N	P13L	SNP	Nucleocapsid protein	N:P13L	C28311T
EPI_ISL_455917	28311	C	T	28281	29873	N	P13L	SNP	Nucleocapsid protein	N:P13L	C28311T
EPI_ISL_455919	28311	C	T	28273	29865	N	P13L	SNP	Nucleocapsid protein	N:P13L	C28311T
EPI_ISL_455921	28311	C	T	28276	29868	N	P13L	SNP	Nucleocapsid protein	N:P13L	C28311T
EPI_ISL_456192	28311	C	T	28311	29903	N	P13L	SNP	Nucleocapsid protein	N:P13L	C28311T
EPI_ISL_456197	28311	C	T	28311	29903	N	P13L	SNP	Nucleocapsid protein	N:P13L	C28311T
EPI_ISL_456553	28311	C	T	28311	29903	N	P13L	SNP	Nucleocapsid protein	N:P13L	C28311T
EPI_ISL_456555	28311	C	T	28311	29903	N	P13L	SNP	Nucleocapsid protein	N:P13L	C28311T
EPI_ISL_456597	28311	C	T	28311	29903	N	P13L	SNP	Nucleocapsid protein	N:P13L	C28311T
EPI_ISL_456599	28311	C	T	28311	29903	N	P13L	SNP	Nucleocapsid protein	N:P13L	C28311T
EPI_ISL_456601	28311	C	T	28311	29903	N	P13L	SNP	Nucleocapsid protein	N:P13L	C28311T
EPI_ISL_456602	28311	C	T	28311	29903	N	P13L	SNP	Nucleocapsid protein	N:P13L	C28311T
EPI_ISL_456604	28311	C	T	28311	29903	N	P13L	SNP	Nucleocapsid protein	N:P13L	C28311T
EPI_ISL_456605	28311	C	T	28311	29903	N	P13L	SNP	Nucleocapsid protein	N:P13L	C28311T
EPI_ISL_456606	28311	C	T	28311	29903	N	P13L	SNP	Nucleocapsid protein	N:P13L	C28311T
EPI_ISL_456607	28311	C	T	28311	29903	N	P13L	SNP	Nucleocapsid protein	N:P13L	C28311T
EPI_ISL_456608	28311	C	T	28311	29903	N	P13L	SNP	Nucleocapsid protein	N:P13L	C28311T
EPI_ISL_456610	28311	C	T	28311	29903	N	P13L	SNP	Nucleocapsid protein	N:P13L	C28311T
EPI_ISL_456611	28311	C	T	28311	29903	N	P13L	SNP	Nucleocapsid protein	N:P13L	C28311T
EPI_ISL_456612	28311	C	T	28311	29903	N	P13L	SNP	Nucleocapsid protein	N:P13L	C28311T
EPI_ISL_457805	28311	C	T	28311	29903	N	P13L	SNP	Nucleocapsid protein	N:P13L	C28311T
EPI_ISL_457977	28311	C	T	28311	29903	N	P13L	SNP	Nucleocapsid protein	N:P13L	C28311T
EPI_ISL_458035	28311	C	T	28271	29824	N	P13L	SNP	Nucleocapsid protein	N:P13L	C28311T
EPI_ISL_458066	28311	C	T	28271	29824	N	P13L	SNP	Nucleocapsid protein	N:P13L	C28311T
EPI_ISL_458067	28311	CC	TT	28271	29824	N	P13L	SNP	Nucleocapsid protein	N:P13L	CC28311TT
EPI_ISL_458068	28311	C	T	28271	29824	N	P13L	SNP	Nucleocapsid protein	N:P13L	C28311T
EPI_ISL_458070	28311	C	T	28271	29824	N	P13L	SNP	Nucleocapsid protein	N:P13L	C28311T
EPI_ISL_458071	28311	C	T	28271	29824	N	P13L	SNP	Nucleocapsid protein	N:P13L	C28311T
EPI_ISL_458075	28311	CC	TT	28281	29839	N	P13L	SNP	Nucleocapsid protein	N:P13L	CC28311TT
EPI_ISL_458077	28311	C	T	28281	29839	N	P13L	SNP	Nucleocapsid protein	N:P13L	C28311T
EPI_ISL_459911	28311	C	T	28311	29903	N	P13L	SNP	Nucleocapsid protein	N:P13L	C28311T
EPI_ISL_459915	28311	C	T	28311	29903	N	P13L	SNP	Nucleocapsid protein	N:P13L	C28311T
EPI_ISL_459917	28311	C	T	28311	29903	N	P13L	SNP	Nucleocapsid protein	N:P13L	C28311T
EPI_ISL_459918	28311	C	T	28311	29903	N	P13L	SNP	Nucleocapsid protein	N:P13L	C28311T
EPI_ISL_459919	28311	C	T	28311	29903	N	P13L	SNP	Nucleocapsid protein	N:P13L	C28311T
EPI_ISL_459920	28311	C	T	28311	29903	N	P13L	SNP	Nucleocapsid protein	N:P13L	C28311T
EPI_ISL_459921	28311	C	T	28311	29903	N	P13L	SNP	Nucleocapsid protein	N:P13L	C28311T
EPI_ISL_459922	28311	C	T	28311	29903	N	P13L	SNP	Nucleocapsid protein	N:P13L	C28311T
EPI_ISL_459923	28311	C	T	28311	29903	N	P13L	SNP	Nucleocapsid protein	N:P13L	C28311T
EPI_ISL_459925	28311	C	T	28311	29903	N	P13L	SNP	Nucleocapsid protein	N:P13L	C28311T
EPI_ISL_459926	28311	C	T	28311	29903	N	P13L	SNP	Nucleocapsid protein	N:P13L	C28311T
EPI_ISL_459927	28311	C	T	28311	29903	N	P13L	SNP	Nucleocapsid protein	N:P13L	C28311T
EPI_ISL_459928	28311	C	T	28311	29903	N	P13L	SNP	Nucleocapsid protein	N:P13L	C28311T
EPI_ISL_459930	28311	C	T	28311	29867	N	P13L	SNP	Nucleocapsid protein	N:P13L	C28311T
EPI_ISL_459931	28311	C	T	28311	29903	N	P13L	SNP	Nucleocapsid protein	N:P13L	C28311T
EPI_ISL_459932	28311	C	T	28311	29903	N	P13L	SNP	Nucleocapsid protein	N:P13L	C28311T
EPI_ISL_459933	28311	C	T	28311	29903	N	P13L	SNP	Nucleocapsid protein	N:P13L	C28311T
EPI_ISL_459934	28311	C	T	28311	29903	N	P13L	SNP	Nucleocapsid protein	N:P13L	C28311T
EPI_ISL_459935	28311	C	T	28311	29903	N	P13L	SNP	Nucleocapsid protein	N:P13L	C28311T
EPI_ISL_459936	28311	C	T	28311	29903	N	P13L	SNP	Nucleocapsid protein	N:P13L	C28311T
EPI_ISL_459937	28311	C	T	28311	29903	N	P13L	SNP	Nucleocapsid protein	N:P13L	C28311T
EPI_ISL_459938	28311	C	T	28311	29903	N	P13L	SNP	Nucleocapsid protein	N:P13L	C28311T
EPI_ISL_459939	28311	C	T	28311	29903	N	P13L	SNP	Nucleocapsid protein	N:P13L	C28311T
EPI_ISL_459940	28311	C	T	28311	29903	N	P13L	SNP	Nucleocapsid protein	N:P13L	C28311T
EPI_ISL_459941	28311	C	T	28311	29903	N	P13L	SNP	Nucleocapsid protein	N:P13L	C28311T
EPI_ISL_459942	28311	C	T	28311	29903	N	P13L	SNP	Nucleocapsid protein	N:P13L	C28311T
EPI_ISL_459943	28311	C	T	28311	29903	N	P13L	SNP	Nucleocapsid protein	N:P13L	C28311T
EPI_ISL_459944	28311	C	T	28311	29903	N	P13L	SNP	Nucleocapsid protein	N:P13L	C28311T
EPI_ISL_459946	28311	C	T	28311	29903	N	P13L	SNP	Nucleocapsid protein	N:P13L	C28311T
EPI_ISL_459947	28311	C	T	28311	29903	N	P13L	SNP	Nucleocapsid protein	N:P13L	C28311T
EPI_ISL_459948	28311	C	T	28311	29903	N	P13L	SNP	Nucleocapsid protein	N:P13L	C28311T
EPI_ISL_459949	28311	C	T	28311	29903	N	P13L	SNP	Nucleocapsid protein	N:P13L	C28311T
EPI_ISL_459950	28311	C	T	28311	29903	N	P13L	SNP	Nucleocapsid protein	N:P13L	C28311T
EPI_ISL_459951	28311	C	T	28311	29903	N	P13L	SNP	Nucleocapsid protein	N:P13L	C28311T
EPI_ISL_459953	28311	C	T	28344	29912	N	P13L	SNP	Nucleocapsid protein	N:P13L	C28311T
EPI_ISL_459955	28311	C	T	28304	29982	N	P13L	SNP	Nucleocapsid protein	N:P13L	C28311T
EPI_ISL_459956	28311	C	T	28371	29939	N	P13L	SNP	Nucleocapsid protein	N:P13L	C28311T
EPI_ISL_459957	28311	C	T	28300	29901	N	P13L	SNP	Nucleocapsid protein	N:P13L	C28311T
EPI_ISL_460048	28311	C	T	28307	29853	N	P13L	SNP	Nucleocapsid protein	N:P13L	C28311T
EPI_ISL_462299	28311	C	T	28311	29891	N	P13L	SNP	Nucleocapsid protein	N:P13L	C28311T
EPI_ISL_462348	28311	C	T	28311	29891	N	P13L	SNP	Nucleocapsid protein	N:P13L	C28311T
EPI_ISL_462357	28311	C	T	28311	29891	N	P13L	SNP	Nucleocapsid protein	N:P13L	C28311T
EPI_ISL_462358	28311	C	T	28311	29891	N	P13L	SNP	Nucleocapsid protein	N:P13L	C28311T
EPI_ISL_462359	28311	C	T	28311	29891	N	P13L	SNP	Nucleocapsid protein	N:P13L	C28311T
EPI_ISL_462368	28311	C	T	28311	29891	N	P13L	SNP	Nucleocapsid protein	N:P13L	C28311T
EPI_ISL_462387	28311	C	T	28311	29891	N	P13L	SNP	Nucleocapsid protein	N:P13L	C28311T
EPI_ISL_462758	28311	C	T	28257	29782	N	P13L	SNP	Nucleocapsid protein	N:P13L	C28311T
EPI_ISL_462794	28311	C	T	28257	29782	N	P13L	SNP	Nucleocapsid protein	N:P13L	C28311T
EPI_ISL_462798	28311	C	T	28257	29782	N	P13L	SNP	Nucleocapsid protein	N:P13L	C28311T
EPI_ISL_463013	28311	C	T	28311	29688	N	P13L	SNP	Nucleocapsid protein	N:P13L	C28311T
EPI_ISL_463014	28311	C	T	28311	29688	N	P13L	SNP	Nucleocapsid protein	N:P13L	C28311T
EPI_ISL_463017	28311	C	T	28311	29765	N	P13L	SNP	Nucleocapsid protein	N:P13L	C28311T
EPI_ISL_463018	28311	C	T	28311	29690	N	P13L	SNP	Nucleocapsid protein	N:P13L	C28311T
EPI_ISL_463019	28311	C	T	28311	29688	N	P13L	SNP	Nucleocapsid protein	N:P13L	C28311T
EPI_ISL_463022	28311	C	T	28311	29685	N	P13L	SNP	Nucleocapsid protein	N:P13L	C28311T
EPI_ISL_463067	28311	C	T	28311	29750	N	P13L	SNP	Nucleocapsid protein	N:P13L	C28311T
EPI_ISL_463213	28311	C	T	28311	29903	N	P13L	SNP	Nucleocapsid protein	N:P13L	C28311T
EPI_ISL_465664	28311	C	T	28311	29903	N	P13L	SNP	Nucleocapsid protein	N:P13L	C28311T
EPI_ISL_466767	28311	C	T	28311	29903	N	P13L	SNP	Nucleocapsid protein	N:P13L	C28311T
EPI_ISL_467830	28311	C	T	28257	29782	N	P13L	SNP	Nucleocapsid protein	N:P13L	C28311T
EPI_ISL_467974	28311	C	T	28311	29903	N	P13L	SNP	Nucleocapsid protein	N:P13L	C28311T
EPI_ISL_467977	28311	C	T	28311	29903	N	P13L	SNP	Nucleocapsid protein	N:P13L	C28311T
EPI_ISL_469136	28311	C	T	28311	29891	N	P13L	SNP	Nucleocapsid protein	N:P13L	C28311T
EPI_ISL_469140	28311	C	T	28311	29891	N	P13L	SNP	Nucleocapsid protein	N:P13L	C28311T
EPI_ISL_469145	28311	C	T	28311	29891	N	P13L	SNP	Nucleocapsid protein	N:P13L	C28311T
EPI_ISL_470880	28311	C	T	28311	29903	N	P13L	SNP	Nucleocapsid protein	N:P13L	C28311T
EPI_ISL_471586	28311	C	T	28278	29833	N	P13L	SNP	Nucleocapsid protein	N:P13L	C28311T
EPI_ISL_471587	28311	C	T	28282	29840	N	P13L	SNP	Nucleocapsid protein	N:P13L	C28311T
EPI_ISL_471644	28311	C	T	28278	29833	N	P13L	SNP	Nucleocapsid protein	N:P13L	C28311T
EPI_ISL_471645	28311	CC	TT	28282	29840	N	P13L	SNP	Nucleocapsid protein	N:P13L	CC28311TT
EPI_ISL_471646	28311	CC	TT	28282	29840	N	P13L	SNP	Nucleocapsid protein	N:P13L	CC28311TT
EPI_ISL_428484	28311	C	T	28281	29836	N	P13L	SNP	Nucleocapsid protein	N:P13L	C28311T
EPI_ISL_434339	28311	C	T	28311	29903	N	P13L	SNP	Nucleocapsid protein	N:P13L	C28311T
EPI_ISL_470871	28311	C	T	26875	28420	N	P13L	SNP	Nucleocapsid protein	N:P13L	C28311T
EPI_ISL_430688	28311	C	T	28311	29903	N	P13L	SNP	Nucleocapsid protein	N:P13L	C28311T
EPI_ISL_463048	28311	C	T	28311	29298	N	P13L	SNP	Nucleocapsid protein	N:P13L	C28311T
EPI_ISL_447565	28311	C	T	28281	29834	N	P13L	SNP	Nucleocapsid protein	N:P13L	C28311T
EPI_ISL_462230	28312	C	T	28258	29782	N	P13P	SNP_silent	Nucleocapsid protein	N:P13P	C28312T
EPI_ISL_468075	28312	C	T	28312	29892	N	P13P	SNP_silent	Nucleocapsid protein	N:P13P	C28312T
EPI_ISL_421855	28313	C	T	28313	29903	N	R14C	SNP	Nucleocapsid protein	N:R14C	C28313T
EPI_ISL_444567	28313	C	T	28313	29903	N	R14C	SNP	Nucleocapsid protein	N:R14C	C28313T
EPI_ISL_460945	28314	G	T	28260	29775	N	R14L	SNP	Nucleocapsid protein	N:R14L	G28314T
EPI_ISL_447105	28314	G	A	28314	29903	N	R14H	SNP	Nucleocapsid protein	N:R14H	G28314A
EPI_ISL_445783	28314	G	T	28310	29899	N	R14L	SNP	Nucleocapsid protein	N:R14L	G28314T
EPI_ISL_446140	28314	G	T	28314	29903	N	R14L	SNP	Nucleocapsid protein	N:R14L	G28314T
EPI_ISL_446473	28314	G	T	28298	29887	N	R14L	SNP	Nucleocapsid protein	N:R14L	G28314T
EPI_ISL_446871	28314	G	T	28284	29873	N	R14L	SNP	Nucleocapsid protein	N:R14L	G28314T
EPI_ISL_449292	28314	G	T	28314	29903	N	R14L	SNP	Nucleocapsid protein	N:R14L	G28314T
EPI_ISL_473857	28314	G	T	28314	29903	N	R14L	SNP	Nucleocapsid protein	N:R14L	G28314T
EPI_ISL_474526	28314	G	T	28305	29894	N	R14L	SNP	Nucleocapsid protein	N:R14L	G28314T
EPI_ISL_432771	28315	C	T	28315	29903	N	R14R	SNP_silent	Nucleocapsid protein	N:R14R	C28315T
EPI_ISL_412983	28315	C	T	28161	29697	N	R14R	SNP_silent	Nucleocapsid protein	N:R14R	C28315T
EPI_ISL_419760	28315	C	T	28311	29899	N	R14R	SNP_silent	Nucleocapsid protein	N:R14R	C28315T
EPI_ISL_448949	28316	A	C	28279	29866	N	I15L	SNP	Nucleocapsid protein	N:I15L	A28316C
EPI_ISL_463510	28318	T	C	28318	29903	N	I15I	SNP_silent	Nucleocapsid protein	N:I15I	T28318C
EPI_ISL_463552	28318	T	C	28318	29903	N	I15I	SNP_silent	Nucleocapsid protein	N:I15I	T28318C
EPI_ISL_463559	28318	T	C	28318	29903	N	I15I	SNP_silent	Nucleocapsid protein	N:I15I	T28318C
EPI_ISL_465216	28319	A	G	28319	29903	N	T16A	SNP	Nucleocapsid protein	N:T16A	A28319G
EPI_ISL_470330	28319	A	G	28265	29782	N	T16A	SNP	Nucleocapsid protein	N:T16A	A28319G
EPI_ISL_448222	28320	C	T	28301	29766	N	T16M	SNP	Nucleocapsid protein	N:T16M	C28320T
EPI_ISL_449326	28320	C	T	28320	29903	N	T16M	SNP	Nucleocapsid protein	N:T16M	C28320T
EPI_ISL_471424	28320	C	T	28320	29903	N	T16M	SNP	Nucleocapsid protein	N:T16M	C28320T
EPI_ISL_432681	28320	C	T	28317	29900	N	T16M	SNP	Nucleocapsid protein	N:T16M	C28320T
EPI_ISL_432952	28320	C	T	28317	29900	N	T16M	SNP	Nucleocapsid protein	N:T16M	C28320T
EPI_ISL_443678	28321	G	T	28267	29782	N	T16T	SNP_silent	Nucleocapsid protein	N:T16T	G28321T
EPI_ISL_444202	28321	G	A	28321	29903	N	T16T	SNP_silent	Nucleocapsid protein	N:T16T	G28321A
EPI_ISL_466637	28321	G	T	28321	29900	N	T16T	SNP_silent	Nucleocapsid protein	N:T16T	G28321T
EPI_ISL_468047	28321	G	A	28261	29760	N	T16T	SNP_silent	Nucleocapsid protein	N:T16T	G28321A
EPI_ISL_450793	28321	G	A	28321	29882	N	T16T	SNP_silent	Nucleocapsid protein	N:T16T	G28321A
EPI_ISL_450795	28321	G	A	28321	29882	N	T16T	SNP_silent	Nucleocapsid protein	N:T16T	G28321A
EPI_ISL_450796	28321	G	A	28321	29882	N	T16T	SNP_silent	Nucleocapsid protein	N:T16T	G28321A
EPI_ISL_419176	28325	G	A	28327	29878	N	G18S	SNP	Nucleocapsid protein	N:G18S	G28325A
EPI_ISL_441469	28325	G	T	28325	29903	N	G18C	SNP	Nucleocapsid protein	N:G18C	G28325T
EPI_ISL_444982	28325	G	T	28293	29871	N	G18C	SNP	Nucleocapsid protein	N:G18C	G28325T
EPI_ISL_447185	28325	G	T	28325	29903	N	G18C	SNP	Nucleocapsid protein	N:G18C	G28325T
EPI_ISL_460040	28325	G	T	28325	29903	N	G18C	SNP	Nucleocapsid protein	N:G18C	G28325T
EPI_ISL_460555	28325	G	T	28325	29903	N	G18C	SNP	Nucleocapsid protein	N:G18C	G28325T
EPI_ISL_460559	28325	G	T	28325	29903	N	G18C	SNP	Nucleocapsid protein	N:G18C	G28325T
EPI_ISL_460591	28325	G	T	28325	29902	N	G18C	SNP	Nucleocapsid protein	N:G18C	G28325T
EPI_ISL_460596	28325	G	T	28325	29903	N	G18C	SNP	Nucleocapsid protein	N:G18C	G28325T
EPI_ISL_460600	28325	G	T	28325	29903	N	G18C	SNP	Nucleocapsid protein	N:G18C	G28325T
EPI_ISL_462660	28325	G	T	28325	29872	N	G18C	SNP	Nucleocapsid protein	N:G18C	G28325T
EPI_ISL_462661	28325	G	T	28325	29900	N	G18C	SNP	Nucleocapsid protein	N:G18C	G28325T
EPI_ISL_462675	28325	G	T	28325	29903	N	G18C	SNP	Nucleocapsid protein	N:G18C	G28325T
EPI_ISL_462677	28325	G	T	28325	29902	N	G18C	SNP	Nucleocapsid protein	N:G18C	G28325T
EPI_ISL_462679	28325	G	T	28325	29879	N	G18C	SNP	Nucleocapsid protein	N:G18C	G28325T
EPI_ISL_462686	28325	G	T	28325	29879	N	G18C	SNP	Nucleocapsid protein	N:G18C	G28325T
EPI_ISL_462689	28325	G	T	28325	29875	N	G18C	SNP	Nucleocapsid protein	N:G18C	G28325T
EPI_ISL_462694	28325	G	T	28325	29895	N	G18C	SNP	Nucleocapsid protein	N:G18C	G28325T
EPI_ISL_462701	28325	G	T	28325	29903	N	G18C	SNP	Nucleocapsid protein	N:G18C	G28325T
EPI_ISL_471706	28325	G	T	28325	29854	N	G18C	SNP	Nucleocapsid protein	N:G18C	G28325T
EPI_ISL_471708	28325	G	T	28325	29878	N	G18C	SNP	Nucleocapsid protein	N:G18C	G28325T
EPI_ISL_471710	28325	G	T	28325	29870	N	G18C	SNP	Nucleocapsid protein	N:G18C	G28325T
EPI_ISL_471711	28325	G	T	28325	29903	N	G18C	SNP	Nucleocapsid protein	N:G18C	G28325T
EPI_ISL_471723	28325	G	T	28325	29903	N	G18C	SNP	Nucleocapsid protein	N:G18C	G28325T
EPI_ISL_471745	28325	G	T	28325	29902	N	G18C	SNP	Nucleocapsid protein	N:G18C	G28325T
EPI_ISL_471759	28325	G	T	28325	29890	N	G18C	SNP	Nucleocapsid protein	N:G18C	G28325T
EPI_ISL_471763	28325	G	T	28325	29903	N	G18C	SNP	Nucleocapsid protein	N:G18C	G28325T
EPI_ISL_471764	28325	G	T	28325	29903	N	G18C	SNP	Nucleocapsid protein	N:G18C	G28325T
EPI_ISL_471766	28325	G	T	28325	29903	N	G18C	SNP	Nucleocapsid protein	N:G18C	G28325T
EPI_ISL_471793	28325	G	T	28325	29895	N	G18C	SNP	Nucleocapsid protein	N:G18C	G28325T
EPI_ISL_471809	28325	G	T	28325	29875	N	G18C	SNP	Nucleocapsid protein	N:G18C	G28325T
EPI_ISL_471821	28325	G	T	28325	29876	N	G18C	SNP	Nucleocapsid protein	N:G18C	G28325T
EPI_ISL_471822	28325	G	T	28325	29903	N	G18C	SNP	Nucleocapsid protein	N:G18C	G28325T
EPI_ISL_471823	28325	G	T	28325	29903	N	G18C	SNP	Nucleocapsid protein	N:G18C	G28325T
EPI_ISL_471835	28325	G	T	28325	29903	N	G18C	SNP	Nucleocapsid protein	N:G18C	G28325T
EPI_ISL_471836	28325	G	T	28325	29903	N	G18C	SNP	Nucleocapsid protein	N:G18C	G28325T
EPI_ISL_471857	28325	G	T	28325	29903	N	G18C	SNP	Nucleocapsid protein	N:G18C	G28325T
EPI_ISL_471887	28325	G	T	28325	29879	N	G18C	SNP	Nucleocapsid protein	N:G18C	G28325T
EPI_ISL_471899	28325	G	T	28325	29894	N	G18C	SNP	Nucleocapsid protein	N:G18C	G28325T
EPI_ISL_473332	28325	G	T	28325	29903	N	G18C	SNP	Nucleocapsid protein	N:G18C	G28325T
EPI_ISL_469566	28325	G	A	28271	29782	N	G18S	SNP	Nucleocapsid protein	N:G18S	G28325A
EPI_ISL_469770	28325	G	A	28273	29784	N	G18S	SNP	Nucleocapsid protein	N:G18S	G28325A
EPI_ISL_440697	28326	G	T	28272	29782	N	G18V	SNP	Nucleocapsid protein	N:G18V	G28326T
EPI_ISL_461367	28326	G	T	28269	29772	N	G18V	SNP	Nucleocapsid protein	N:G18V	G28326T
EPI_ISL_455749	28326	G	T	28326	29685	N	G18V	SNP	Nucleocapsid protein	N:G18V	G28326T
EPI_ISL_455760	28326	G	T	28326	29686	N	G18V	SNP	Nucleocapsid protein	N:G18V	G28326T
EPI_ISL_455751	28326	G	T	28326	29048	N	G18V	SNP	Nucleocapsid protein	N:G18V	G28326T
EPI_ISL_455752	28326	G	T	28326	29685	N	G18V	SNP	Nucleocapsid protein	N:G18V	G28326T
EPI_ISL_455753	28326	G	T	28326	29682	N	G18V	SNP	Nucleocapsid protein	N:G18V	G28326T
EPI_ISL_455758	28326	G	T	28326	29464	N	G18V	SNP	Nucleocapsid protein	N:G18V	G28326T
EPI_ISL_455759	28326	G	T	28326	29370	N	G18V	SNP	Nucleocapsid protein	N:G18V	G28326T
EPI_ISL_455761	28326	G	T	28326	29675	N	G18V	SNP	Nucleocapsid protein	N:G18V	G28326T
EPI_ISL_455762	28326	G	T	28326	29365	N	G18V	SNP	Nucleocapsid protein	N:G18V	G28326T
EPI_ISL_455763	28326	G	T	28326	29853	N	G18V	SNP	Nucleocapsid protein	N:G18V	G28326T
EPI_ISL_455764	28326	G	T	28326	29690	N	G18V	SNP	Nucleocapsid protein	N:G18V	G28326T
EPI_ISL_455766	28326	G	T	28326	29689	N	G18V	SNP	Nucleocapsid protein	N:G18V	G28326T
EPI_ISL_455767	28326	G	T	28326	29693	N	G18V	SNP	Nucleocapsid protein	N:G18V	G28326T
EPI_ISL_455769	28326	G	T	28326	29061	N	G18V	SNP	Nucleocapsid protein	N:G18V	G28326T
EPI_ISL_455770	28326	G	T	28326	29685	N	G18V	SNP	Nucleocapsid protein	N:G18V	G28326T
EPI_ISL_463024	28326	G	T	28326	29703	N	G18V	SNP	Nucleocapsid protein	N:G18V	G28326T
EPI_ISL_463026	28326	G	T	28326	29814	N	G18V	SNP	Nucleocapsid protein	N:G18V	G28326T
EPI_ISL_424336	28326	G	T	27971	29482	N	G18V	SNP	Nucleocapsid protein	N:G18V	G28326T
EPI_ISL_441776	28328	G	A	28274	29782	N	G19R	SNP	Nucleocapsid protein	N:G19R	G28328A
EPI_ISL_458668	28328	G	A	28274	29782	N	G19R	SNP	Nucleocapsid protein	N:G19R	G28328A
EPI_ISL_468421	28328	G	A	28328	29903	N	G19R	SNP	Nucleocapsid protein	N:G19R	G28328A
EPI_ISL_468422	28328	G	A	28328	29903	N	G19R	SNP	Nucleocapsid protein	N:G19R	G28328A
EPI_ISL_468423	28328	G	A	28328	29853	N	G19R	SNP	Nucleocapsid protein	N:G19R	G28328A
EPI_ISL_423807	28328	G	C	28328	29903	N	G19R	SNP	Nucleocapsid protein	N:G19R	G28328C
EPI_ISL_448523	28328	G	A	28328	29903	N	G19R	SNP	Nucleocapsid protein	N:G19R	G28328A
EPI_ISL_464987	28328	G	A	28328	29903	N	G19R	SNP	Nucleocapsid protein	N:G19R	G28328A
EPI_ISL_425749	28329	G	T	28275	29782	N	G19V	SNP	Nucleocapsid protein	N:G19V	G28329T
EPI_ISL_425814	28329	G	T	28275	29782	N	G19V	SNP	Nucleocapsid protein	N:G19V	G28329T
EPI_ISL_429399	28329	G	T	28329	29903	N	G19V	SNP	Nucleocapsid protein	N:G19V	G28329T
EPI_ISL_429405	28329	G	T	28329	29903	N	G19V	SNP	Nucleocapsid protein	N:G19V	G28329T
EPI_ISL_440534	28329	G	T	28275	29782	N	G19V	SNP	Nucleocapsid protein	N:G19V	G28329T
EPI_ISL_444117	28329	G	A	28329	29903	N	G19E	SNP	Nucleocapsid protein	N:G19E	G28329A
EPI_ISL_449656	28329	G	A	28329	29903	N	G19E	SNP	Nucleocapsid protein	N:G19E	G28329A
EPI_ISL_454496	28329	G	T	28329	29903	N	G19V	SNP	Nucleocapsid protein	N:G19V	G28329T
EPI_ISL_462990	28329	G	A	28299	29839	N	G19E	SNP	Nucleocapsid protein	N:G19E	G28329A
EPI_ISL_432799	28329	G	T	28326	29900	N	G19V	SNP	Nucleocapsid protein	N:G19V	G28329T
EPI_ISL_441478	28330	A	G	28330	29903	N	G19G	SNP_silent	Nucleocapsid protein	N:G19G	A28330G
EPI_ISL_429559	28331	C	T	28331	29903	N	P20S	SNP	Nucleocapsid protein	N:P20S	C28331T
EPI_ISL_464022	28331	C	T	28331	29903	N	P20S	SNP	Nucleocapsid protein	N:P20S	C28331T
EPI_ISL_464033	28331	C	T	28331	29903	N	P20S	SNP	Nucleocapsid protein	N:P20S	C28331T
EPI_ISL_464041	28331	C	T	28331	29903	N	P20S	SNP	Nucleocapsid protein	N:P20S	C28331T
EPI_ISL_421877	28331	C	T	28331	29903	N	P20S	SNP	Nucleocapsid protein	N:P20S	C28331T
EPI_ISL_421878	28331	C	T	28331	29903	N	P20S	SNP	Nucleocapsid protein	N:P20S	C28331T
EPI_ISL_422436	28331	C	T	28331	29903	N	P20S	SNP	Nucleocapsid protein	N:P20S	C28331T
EPI_ISL_423156	28331	C	T	28331	29903	N	P20S	SNP	Nucleocapsid protein	N:P20S	C28331T
EPI_ISL_423356	28331	C	T	28331	29903	N	P20S	SNP	Nucleocapsid protein	N:P20S	C28331T
EPI_ISL_423357	28331	C	T	28331	29903	N	P20S	SNP	Nucleocapsid protein	N:P20S	C28331T
EPI_ISL_422546	28332	C	T	28277	29719	N	P20L	SNP	Nucleocapsid protein	N:P20L	C28332T
EPI_ISL_435057	28332	C	.	28368	30093	N	P20	deletion_frameshift	Nucleocapsid protein	N:P20	C28332.
EPI_ISL_468452	28332	C	T	28298	29832	N	P20L	SNP	Nucleocapsid protein	N:P20L	C28332T
EPI_ISL_467346	28332	C	T	28292	29740	N	P20L	SNP	Nucleocapsid protein	N:P20L	C28332T
EPI_ISL_432801	28332	C	T	28329	29900	N	P20L	SNP	Nucleocapsid protein	N:P20L	C28332T
EPI_ISL_470608	28334	T	A	28280	29782	N	S21T	SNP	Nucleocapsid protein	N:S21T	T28334A
EPI_ISL_457260	28335	C	T	28335	29903	N	S21L	SNP	Nucleocapsid protein	N:S21L	C28335T
EPI_ISL_465126	28336	A	T	28336	29903	N	S21S	SNP_silent	Nucleocapsid protein	N:S21S	A28336T
EPI_ISL_460414	28337	G	T	28320	29855	N	D22Y	SNP	Nucleocapsid protein	N:D22Y	G28337T
EPI_ISL_426777	28337	G	T	28337	29903	N	D22Y	SNP	Nucleocapsid protein	N:D22Y	G28337T
EPI_ISL_426854	28337	G	T	28337	29903	N	D22Y	SNP	Nucleocapsid protein	N:D22Y	G28337T
EPI_ISL_442606	28337	G	T	28283	29849	N	D22Y	SNP	Nucleocapsid protein	N:D22Y	G28337T
EPI_ISL_460268	28337	G	T	28331	29871	N	D22Y	SNP	Nucleocapsid protein	N:D22Y	G28337T
EPI_ISL_467053	28337	G	T	28337	29903	N	D22Y	SNP	Nucleocapsid protein	N:D22Y	G28337T
EPI_ISL_452980	28338	A	G	28338	29903	N	D22G	SNP	Nucleocapsid protein	N:D22G	A28338G
EPI_ISL_427140	28338	A	G	28338	29903	N	D22G	SNP	Nucleocapsid protein	N:D22G	A28338G
EPI_ISL_465306	28338	A	G	28337	29902	N	D22G	SNP	Nucleocapsid protein	N:D22G	A28338G
EPI_ISL_443976	28338	A	G	28275	29803	N	D22G	SNP	Nucleocapsid protein	N:D22G	A28338G
EPI_ISL_465243	28338	A	G	28329	29894	N	D22G	SNP	Nucleocapsid protein	N:D22G	A28338G
EPI_ISL_418669	28338	A	G	28338	29903	N	D22G	SNP	Nucleocapsid protein	N:D22G	A28338G
EPI_ISL_419399	28338	A	G	28337	29902	N	D22G	SNP	Nucleocapsid protein	N:D22G	A28338G
EPI_ISL_423813	28338	A	G	28338	29903	N	D22G	SNP	Nucleocapsid protein	N:D22G	A28338G
EPI_ISL_465774	28338	A	G	28338	29903	N	D22G	SNP	Nucleocapsid protein	N:D22G	A28338G
EPI_ISL_423112	28338	A	G	28329	29894	N	D22G	SNP	Nucleocapsid protein	N:D22G	A28338G
EPI_ISL_442216	28338	A	G	28284	29782	N	D22G	SNP	Nucleocapsid protein	N:D22G	A28338G
EPI_ISL_423958	28338	A	G	28338	29903	N	D22G	SNP	Nucleocapsid protein	N:D22G	A28338G
EPI_ISL_441112	28338	A	G	28284	29849	N	D22G	SNP	Nucleocapsid protein	N:D22G	A28338G
EPI_ISL_423474	28338	A	G	28338	29903	N	D22G	SNP	Nucleocapsid protein	N:D22G	A28338G
EPI_ISL_432270	28338	A	G	28336	29901	N	D22G	SNP	Nucleocapsid protein	N:D22G	A28338G
EPI_ISL_438398	28338	A	G	28284	29813	N	D22G	SNP	Nucleocapsid protein	N:D22G	A28338G
EPI_ISL_442060	28338	A	G	28284	29782	N	D22G	SNP	Nucleocapsid protein	N:D22G	A28338G
EPI_ISL_445459	28338	A	G	28334	29899	N	D22G	SNP	Nucleocapsid protein	N:D22G	A28338G
EPI_ISL_445498	28338	A	G	28332	29897	N	D22G	SNP	Nucleocapsid protein	N:D22G	A28338G
EPI_ISL_448650	28338	A	G	28338	29903	N	D22G	SNP	Nucleocapsid protein	N:D22G	A28338G
EPI_ISL_448748	28338	A	G	28338	29903	N	D22G	SNP	Nucleocapsid protein	N:D22G	A28338G
EPI_ISL_465307	28338	A	G	28338	29903	N	D22G	SNP	Nucleocapsid protein	N:D22G	A28338G
EPI_ISL_472551	28338	A	G	28303	29868	N	D22G	SNP	Nucleocapsid protein	N:D22G	A28338G
EPI_ISL_472913	28338	A	G	28338	29903	N	D22G	SNP	Nucleocapsid protein	N:D22G	A28338G
EPI_ISL_443653	28338	A	G	28284	29782	N	D22G	SNP	Nucleocapsid protein	N:D22G	A28338G
EPI_ISL_456177	28338	A	G	28338	29903	N	D22G	SNP	Nucleocapsid protein	N:D22G	A28338G
EPI_ISL_417212	28338	A	G	28171	29685	N	D22G	SNP	Nucleocapsid protein	N:D22G	A28338G
EPI_ISL_456159	28338	A	G	28338	29903	N	D22G	SNP	Nucleocapsid protein	N:D22G	A28338G
EPI_ISL_456162	28338	A	G	28338	29903	N	D22G	SNP	Nucleocapsid protein	N:D22G	A28338G
EPI_ISL_456252	28338	A	G	28338	29903	N	D22G	SNP	Nucleocapsid protein	N:D22G	A28338G
EPI_ISL_456233	28338	A	G	28338	29903	N	D22G	SNP	Nucleocapsid protein	N:D22G	A28338G
EPI_ISL_456235	28338	A	G	28338	29903	N	D22G	SNP	Nucleocapsid protein	N:D22G	A28338G
EPI_ISL_426788	28338	A	G	28338	29903	N	D22G	SNP	Nucleocapsid protein	N:D22G	A28338G
EPI_ISL_423393	28338	A	G	28338	29903	N	D22G	SNP	Nucleocapsid protein	N:D22G	A28338G
EPI_ISL_466414	28338	A	G	28337	29902	N	D22G	SNP	Nucleocapsid protein	N:D22G	A28338G
EPI_ISL_466352	28338	A	G	28338	29903	N	D22G	SNP	Nucleocapsid protein	N:D22G	A28338G
EPI_ISL_419918	28338	A	G	28335	29900	N	D22G	SNP	Nucleocapsid protein	N:D22G	A28338G
EPI_ISL_419973	28338	A	G	28328	29893	N	D22G	SNP	Nucleocapsid protein	N:D22G	A28338G
EPI_ISL_419981	28338	A	G	28288	29853	N	D22G	SNP	Nucleocapsid protein	N:D22G	A28338G
EPI_ISL_419996	28338	A	G	28326	29891	N	D22G	SNP	Nucleocapsid protein	N:D22G	A28338G
EPI_ISL_420016	28338	A	G	28300	29865	N	D22G	SNP	Nucleocapsid protein	N:D22G	A28338G
EPI_ISL_420017	28338	A	G	28337	29902	N	D22G	SNP	Nucleocapsid protein	N:D22G	A28338G
EPI_ISL_423088	28338	A	G	28338	29903	N	D22G	SNP	Nucleocapsid protein	N:D22G	A28338G
EPI_ISL_426651	28338	A	G	28334	29856	N	D22G	SNP	Nucleocapsid protein	N:D22G	A28338G
EPI_ISL_426653	28338	A	G	28300	29820	N	D22G	SNP	Nucleocapsid protein	N:D22G	A28338G
EPI_ISL_426685	28338	A	G	28338	29903	N	D22G	SNP	Nucleocapsid protein	N:D22G	A28338G
EPI_ISL_426706	28338	A	G	28337	29902	N	D22G	SNP	Nucleocapsid protein	N:D22G	A28338G
EPI_ISL_426722	28338	A	G	28338	29903	N	D22G	SNP	Nucleocapsid protein	N:D22G	A28338G
EPI_ISL_426779	28338	A	G	28338	29903	N	D22G	SNP	Nucleocapsid protein	N:D22G	A28338G
EPI_ISL_426781	28338	A	G	28338	29903	N	D22G	SNP	Nucleocapsid protein	N:D22G	A28338G
EPI_ISL_427030	28338	A	G	28338	29883	N	D22G	SNP	Nucleocapsid protein	N:D22G	A28338G
EPI_ISL_427082	28338	A	G	28338	29903	N	D22G	SNP	Nucleocapsid protein	N:D22G	A28338G
EPI_ISL_427668	28338	A	G	28074	29412	N	D22G	SNP	Nucleocapsid protein	N:D22G	A28338G
EPI_ISL_427687	28338	A	G	28074	29412	N	D22G	SNP	Nucleocapsid protein	N:D22G	A28338G
EPI_ISL_429257	28338	A	G	28338	29903	N	D22G	SNP	Nucleocapsid protein	N:D22G	A28338G
EPI_ISL_430653	28338	A	G	28338	29903	N	D22G	SNP	Nucleocapsid protein	N:D22G	A28338G
EPI_ISL_444943	28338	A	G	28338	29903	N	D22G	SNP	Nucleocapsid protein	N:D22G	A28338G
EPI_ISL_456187	28338	A	G	28338	29903	N	D22G	SNP	Nucleocapsid protein	N:D22G	A28338G
EPI_ISL_456190	28338	A	G	28338	29903	N	D22G	SNP	Nucleocapsid protein	N:D22G	A28338G
EPI_ISL_456201	28338	A	G	28338	29903	N	D22G	SNP	Nucleocapsid protein	N:D22G	A28338G
EPI_ISL_456205	28338	A	G	28338	29903	N	D22G	SNP	Nucleocapsid protein	N:D22G	A28338G
EPI_ISL_456216	28338	A	G	28338	29903	N	D22G	SNP	Nucleocapsid protein	N:D22G	A28338G
EPI_ISL_456220	28338	A	G	28338	29903	N	D22G	SNP	Nucleocapsid protein	N:D22G	A28338G
EPI_ISL_456236	28338	A	G	28338	29903	N	D22G	SNP	Nucleocapsid protein	N:D22G	A28338G
EPI_ISL_456237	28338	A	G	28338	29903	N	D22G	SNP	Nucleocapsid protein	N:D22G	A28338G
EPI_ISL_456240	28338	A	G	28338	29903	N	D22G	SNP	Nucleocapsid protein	N:D22G	A28338G
EPI_ISL_456242	28338	A	G	28338	29903	N	D22G	SNP	Nucleocapsid protein	N:D22G	A28338G
EPI_ISL_456254	28338	A	G	28338	29903	N	D22G	SNP	Nucleocapsid protein	N:D22G	A28338G
EPI_ISL_456274	28338	A	G	28338	29903	N	D22G	SNP	Nucleocapsid protein	N:D22G	A28338G
EPI_ISL_456280	28338	A	G	28338	29903	N	D22G	SNP	Nucleocapsid protein	N:D22G	A28338G
EPI_ISL_456284	28338	A	G	28338	29903	N	D22G	SNP	Nucleocapsid protein	N:D22G	A28338G
EPI_ISL_456305	28338	A	G	28338	29903	N	D22G	SNP	Nucleocapsid protein	N:D22G	A28338G
EPI_ISL_456318	28338	A	G	28338	29903	N	D22G	SNP	Nucleocapsid protein	N:D22G	A28338G
EPI_ISL_456357	28338	A	G	28338	29903	N	D22G	SNP	Nucleocapsid protein	N:D22G	A28338G
EPI_ISL_456449	28338	A	G	28338	29903	N	D22G	SNP	Nucleocapsid protein	N:D22G	A28338G
EPI_ISL_465092	28338	A	G	28338	29903	N	D22G	SNP	Nucleocapsid protein	N:D22G	A28338G
EPI_ISL_424158	28338	A	G	28338	29903	N	D22G	SNP	Nucleocapsid protein	N:D22G	A28338G
EPI_ISL_439527	28338	A	G	28334	29899	N	D22G	SNP	Nucleocapsid protein	N:D22G	A28338G
EPI_ISL_423985	28338	A	G	28338	29903	N	D22G	SNP	Nucleocapsid protein	N:D22G	A28338G
EPI_ISL_424019	28338	A	G	28338	29903	N	D22G	SNP	Nucleocapsid protein	N:D22G	A28338G
EPI_ISL_442769	28338	A	G	28287	29785	N	D22G	SNP	Nucleocapsid protein	N:D22G	A28338G
EPI_ISL_465898	28338	A	G	28338	29903	N	D22G	SNP	Nucleocapsid protein	N:D22G	A28338G
EPI_ISL_436102	28338	A	G	28338	29952	N	D22G	SNP	Nucleocapsid protein	N:D22G	A28338G
EPI_ISL_464827	28338	A	G	28338	29903	N	D22G	SNP	Nucleocapsid protein	N:D22G	A28338G
EPI_ISL_449645	28338	A	G	28338	29903	N	D22G	SNP	Nucleocapsid protein	N:D22G	A28338G
EPI_ISL_466012	28338	A	G	28338	29903	N	D22G	SNP	Nucleocapsid protein	N:D22G	A28338G
EPI_ISL_438626	28338	A	G	28338	29903	N	D22G	SNP	Nucleocapsid protein	N:D22G	A28338G
EPI_ISL_459413	28338	A	G	28287	29785	N	D22G	SNP	Nucleocapsid protein	N:D22G	A28338G
EPI_ISL_422007	28338	A	G	28338	29903	N	D22G	SNP	Nucleocapsid protein	N:D22G	A28338G
EPI_ISL_422177	28338	A	G	28331	29896	N	D22G	SNP	Nucleocapsid protein	N:D22G	A28338G
EPI_ISL_423426	28338	A	G	28338	29903	N	D22G	SNP	Nucleocapsid protein	N:D22G	A28338G
EPI_ISL_423704	28338	A	G	28338	29903	N	D22G	SNP	Nucleocapsid protein	N:D22G	A28338G
EPI_ISL_441735	28338	A	G	28284	29803	N	D22G	SNP	Nucleocapsid protein	N:D22G	A28338G
EPI_ISL_442900	28338	A	G	28284	29782	N	D22G	SNP	Nucleocapsid protein	N:D22G	A28338G
EPI_ISL_443102	28338	A	G	28284	29849	N	D22G	SNP	Nucleocapsid protein	N:D22G	A28338G
EPI_ISL_432988	28338	A	G	28338	29903	N	D22G	SNP	Nucleocapsid protein	N:D22G	A28338G
EPI_ISL_465797	28338	A	G	28338	29903	N	D22G	SNP	Nucleocapsid protein	N:D22G	A28338G
EPI_ISL_420676	28338	A	G	28338	29903	N	D22G	SNP	Nucleocapsid protein	N:D22G	A28338G
EPI_ISL_465879	28338	A	G	28338	29903	N	D22G	SNP	Nucleocapsid protein	N:D22G	A28338G
EPI_ISL_459069	28338	A	G	28284	29782	N	D22G	SNP	Nucleocapsid protein	N:D22G	A28338G
EPI_ISL_465608	28338	A	G	28338	29903	N	D22G	SNP	Nucleocapsid protein	N:D22G	A28338G
EPI_ISL_423210	28338	A	G	28338	29903	N	D22G	SNP	Nucleocapsid protein	N:D22G	A28338G
EPI_ISL_424164	28338	A	G	28338	29903	N	D22G	SNP	Nucleocapsid protein	N:D22G	A28338G
EPI_ISL_465735	28338	A	G	28338	29903	N	D22G	SNP	Nucleocapsid protein	N:D22G	A28338G
EPI_ISL_427028	28338	A	G	28341	29906	N	D22G	SNP	Nucleocapsid protein	N:D22G	A28338G
EPI_ISL_438282	28338	A	G	28287	29732	N	D22G	SNP	Nucleocapsid protein	N:D22G	A28338G
EPI_ISL_442699	28338	A	G	28287	29815	N	D22G	SNP	Nucleocapsid protein	N:D22G	A28338G
EPI_ISL_466527	28338	A	G	28341	29906	N	D22G	SNP	Nucleocapsid protein	N:D22G	A28338G
EPI_ISL_419873	28338	A	G	28332	29897	N	D22G	SNP	Nucleocapsid protein	N:D22G	A28338G
EPI_ISL_421929	28338	A	G	28338	29903	N	D22G	SNP	Nucleocapsid protein	N:D22G	A28338G
EPI_ISL_423259	28338	A	G	28338	29903	N	D22G	SNP	Nucleocapsid protein	N:D22G	A28338G
EPI_ISL_423273	28338	A	G	28338	29903	N	D22G	SNP	Nucleocapsid protein	N:D22G	A28338G
EPI_ISL_423622	28338	A	G	28338	29903	N	D22G	SNP	Nucleocapsid protein	N:D22G	A28338G
EPI_ISL_423767	28338	A	G	28338	29903	N	D22G	SNP	Nucleocapsid protein	N:D22G	A28338G
EPI_ISL_423933	28338	A	G	28338	29903	N	D22G	SNP	Nucleocapsid protein	N:D22G	A28338G
EPI_ISL_440122	28338	A	G	28284	29782	N	D22G	SNP	Nucleocapsid protein	N:D22G	A28338G
EPI_ISL_441099	28338	A	G	28284	29782	N	D22G	SNP	Nucleocapsid protein	N:D22G	A28338G
EPI_ISL_441300	28338	A	G	28284	29849	N	D22G	SNP	Nucleocapsid protein	N:D22G	A28338G
EPI_ISL_464814	28338	A	G	28338	29903	N	D22G	SNP	Nucleocapsid protein	N:D22G	A28338G
EPI_ISL_465034	28338	A	G	28338	29903	N	D22G	SNP	Nucleocapsid protein	N:D22G	A28338G
EPI_ISL_465830	28338	A	G	28338	29903	N	D22G	SNP	Nucleocapsid protein	N:D22G	A28338G
EPI_ISL_466327	28338	A	G	28338	29903	N	D22G	SNP	Nucleocapsid protein	N:D22G	A28338G
EPI_ISL_466337	28338	A	G	28338	29903	N	D22G	SNP	Nucleocapsid protein	N:D22G	A28338G
EPI_ISL_470501	28338	A	G	28284	29782	N	D22G	SNP	Nucleocapsid protein	N:D22G	A28338G
EPI_ISL_466328	28338	A	G	28338	29903	N	D22G	SNP	Nucleocapsid protein	N:D22G	A28338G
EPI_ISL_466339	28338	A	G	28338	29903	N	D22G	SNP	Nucleocapsid protein	N:D22G	A28338G
EPI_ISL_456008	28339	T	A	28339	29903	N	D22E	SNP	Nucleocapsid protein	N:D22E	T28339A
EPI_ISL_422983	28340	T	A	28309	29868	N	S23T	SNP	Nucleocapsid protein	N:S23T	T28340A
EPI_ISL_416355	28340	T	C	28286	29812	N	S23P	SNP	Nucleocapsid protein	N:S23P	T28340C
EPI_ISL_441127	28341	C	T	28287	29782	N	S23L	SNP	Nucleocapsid protein	N:S23L	C28341T
EPI_ISL_456751	28341	C	T	28341	29903	N	S23L	SNP	Nucleocapsid protein	N:S23L	C28341T
EPI_ISL_456752	28341	C	T	28341	29903	N	S23L	SNP	Nucleocapsid protein	N:S23L	C28341T
EPI_ISL_456753	28341	C	T	28341	29903	N	S23L	SNP	Nucleocapsid protein	N:S23L	C28341T
EPI_ISL_461445	28344	C	T	28338	29897	N	T24I	SNP	Nucleocapsid protein	N:T24I	C28344T
EPI_ISL_414429	28344	C	A	28301	29786	N	T24N	SNP	Nucleocapsid protein	N:T24N	C28344A
EPI_ISL_415467	28344	C	A	28301	29786	N	T24N	SNP	Nucleocapsid protein	N:T24N	C28344A
EPI_ISL_415483	28344	C	A	28301	29786	N	T24N	SNP	Nucleocapsid protein	N:T24N	C28344A
EPI_ISL_415498	28344	C	A	28301	29786	N	T24N	SNP	Nucleocapsid protein	N:T24N	C28344A
EPI_ISL_417644	28344	C	A	28344	29903	N	T24N	SNP	Nucleocapsid protein	N:T24N	C28344A
EPI_ISL_417684	28344	C	A	28344	29903	N	T24N	SNP	Nucleocapsid protein	N:T24N	C28344A
EPI_ISL_417688	28344	C	A	28344	29903	N	T24N	SNP	Nucleocapsid protein	N:T24N	C28344A
EPI_ISL_417769	28344	C	A	28344	29903	N	T24N	SNP	Nucleocapsid protein	N:T24N	C28344A
EPI_ISL_417828	28344	C	A	28344	29903	N	T24N	SNP	Nucleocapsid protein	N:T24N	C28344A
EPI_ISL_417834	28344	C	A	28344	29903	N	T24N	SNP	Nucleocapsid protein	N:T24N	C28344A
EPI_ISL_417840	28344	C	A	28344	29903	N	T24N	SNP	Nucleocapsid protein	N:T24N	C28344A
EPI_ISL_417843	28344	C	A	28344	29903	N	T24N	SNP	Nucleocapsid protein	N:T24N	C28344A
EPI_ISL_417862	28344	C	A	28344	29903	N	T24N	SNP	Nucleocapsid protein	N:T24N	C28344A
EPI_ISL_418983	28344	C	A	28290	29782	N	T24N	SNP	Nucleocapsid protein	N:T24N	C28344A
EPI_ISL_419446	28344	C	A	28319	29878	N	T24N	SNP	Nucleocapsid protein	N:T24N	C28344A
EPI_ISL_420899	28344	C	A	28344	29903	N	T24N	SNP	Nucleocapsid protein	N:T24N	C28344A
EPI_ISL_420902	28344	C	A	28344	29903	N	T24N	SNP	Nucleocapsid protein	N:T24N	C28344A
EPI_ISL_424373	28344	C	A	28344	29903	N	T24N	SNP	Nucleocapsid protein	N:T24N	C28344A
EPI_ISL_425777	28344	C	A	28290	29782	N	T24N	SNP	Nucleocapsid protein	N:T24N	C28344A
EPI_ISL_437204	28344	C	A	28344	29903	N	T24N	SNP	Nucleocapsid protein	N:T24N	C28344A
EPI_ISL_437230	28344	C	A	28344	29903	N	T24N	SNP	Nucleocapsid protein	N:T24N	C28344A
EPI_ISL_437247	28344	C	A	28344	29903	N	T24N	SNP	Nucleocapsid protein	N:T24N	C28344A
EPI_ISL_437248	28344	C	A	28344	29903	N	T24N	SNP	Nucleocapsid protein	N:T24N	C28344A
EPI_ISL_437250	28344	C	A	28344	29903	N	T24N	SNP	Nucleocapsid protein	N:T24N	C28344A
EPI_ISL_437251	28344	C	A	28344	29903	N	T24N	SNP	Nucleocapsid protein	N:T24N	C28344A
EPI_ISL_440551	28344	C	A	28290	29782	N	T24N	SNP	Nucleocapsid protein	N:T24N	C28344A
EPI_ISL_441604	28344	C	T	28290	29782	N	T24I	SNP	Nucleocapsid protein	N:T24I	C28344T
EPI_ISL_442555	28344	C	T	28290	29849	N	T24I	SNP	Nucleocapsid protein	N:T24I	C28344T
EPI_ISL_443298	28344	C	T	28344	29874	N	T24I	SNP	Nucleocapsid protein	N:T24I	C28344T
EPI_ISL_445427	28344	C	A	28344	29903	N	T24N	SNP	Nucleocapsid protein	N:T24N	C28344A
EPI_ISL_448500	28344	C	A	28344	29903	N	T24N	SNP	Nucleocapsid protein	N:T24N	C28344A
EPI_ISL_448530	28344	C	A	28344	29903	N	T24N	SNP	Nucleocapsid protein	N:T24N	C28344A
EPI_ISL_448533	28344	C	A	28344	29903	N	T24N	SNP	Nucleocapsid protein	N:T24N	C28344A
EPI_ISL_448779	28344	C	A	28344	29903	N	T24N	SNP	Nucleocapsid protein	N:T24N	C28344A
EPI_ISL_459612	28344	C	A	28290	29782	N	T24N	SNP	Nucleocapsid protein	N:T24N	C28344A
EPI_ISL_461114	28344	C	A	28290	29775	N	T24N	SNP	Nucleocapsid protein	N:T24N	C28344A
EPI_ISL_464412	28344	C	A	28344	29903	N	T24N	SNP	Nucleocapsid protein	N:T24N	C28344A
EPI_ISL_464984	28344	C	A	28344	29903	N	T24N	SNP	Nucleocapsid protein	N:T24N	C28344A
EPI_ISL_465068	28344	C	A	28344	29903	N	T24N	SNP	Nucleocapsid protein	N:T24N	C28344A
EPI_ISL_469077	28344	C	A	28341	29900	N	T24N	SNP	Nucleocapsid protein	N:T24N	C28344A
EPI_ISL_420455	28344	C	A	28344	29903	N	T24N	SNP	Nucleocapsid protein	N:T24N	C28344A
EPI_ISL_422238	28344	C	T	28306	29865	N	T24I	SNP	Nucleocapsid protein	N:T24I	C28344T
EPI_ISL_431919	28344	C	T	28306	29865	N	T24I	SNP	Nucleocapsid protein	N:T24I	C28344T
EPI_ISL_445895	28344	C	T	28337	29896	N	T24I	SNP	Nucleocapsid protein	N:T24I	C28344T
EPI_ISL_445897	28344	C	T	28306	29865	N	T24I	SNP	Nucleocapsid protein	N:T24I	C28344T
EPI_ISL_472538	28344	C	T	28334	29893	N	T24I	SNP	Nucleocapsid protein	N:T24I	C28344T
EPI_ISL_472579	28344	C	T	28344	29903	N	T24I	SNP	Nucleocapsid protein	N:T24I	C28344T
EPI_ISL_425148	28344	C	T	28290	29611	N	T24I	SNP	Nucleocapsid protein	N:T24I	C28344T
EPI_ISL_417674	28344	C	A	28344	29903	N	T24N	SNP	Nucleocapsid protein	N:T24N	C28344A
EPI_ISL_415600	28344	C	T	28283	29842	N	T24I	SNP	Nucleocapsid protein	N:T24I	C28344T
EPI_ISL_451872	28345	T	A	28345	29903	N	T24T	SNP_silent	Nucleocapsid protein	N:T24T	T28345A
EPI_ISL_463006	28346	GG	TT	28334	29825	N	G25F	SNP	Nucleocapsid protein	N:G25F	GG28346TT
EPI_ISL_447354	28346	G	T	28347	29892	N	G25C	SNP	Nucleocapsid protein	N:G25C	G28346T
EPI_ISL_447374	28346	G	T	28347	29892	N	G25C	SNP	Nucleocapsid protein	N:G25C	G28346T
EPI_ISL_465615	28346	G	T	28346	29903	N	G25C	SNP	Nucleocapsid protein	N:G25C	G28346T
EPI_ISL_465616	28346	G	T	28346	29903	N	G25C	SNP	Nucleocapsid protein	N:G25C	G28346T
EPI_ISL_465631	28346	G	T	28346	29903	N	G25C	SNP	Nucleocapsid protein	N:G25C	G28346T
EPI_ISL_456083	28347	G	A	28293	29714	N	G25D	SNP	Nucleocapsid protein	N:G25D	G28347A
EPI_ISL_432579	28347	G	T	28347	29903	N	G25V	SNP	Nucleocapsid protein	N:G25V	G28347T
EPI_ISL_467256	28349	A	T	28349	29903	N	S26C	SNP	Nucleocapsid protein	N:S26C	A28349T
EPI_ISL_471261	28349	A	G	28295	29782	N	S26G	SNP	Nucleocapsid protein	N:S26G	A28349G
EPI_ISL_439551	28350	G	T	28296	29849	N	S26I	SNP	Nucleocapsid protein	N:S26I	G28350T
EPI_ISL_441658	28350	G	T	28296	29782	N	S26I	SNP	Nucleocapsid protein	N:S26I	G28350T
EPI_ISL_466110	28350	G	T	28350	29903	N	S26I	SNP	Nucleocapsid protein	N:S26I	G28350T
EPI_ISL_454539	28350	GT	TC	28350	29903	N	S26I	SNP	Nucleocapsid protein	N:S26I	GT28350TC
EPI_ISL_425428	28352	A	T	28352	29903	N	N27Y	SNP	Nucleocapsid protein	N:N27Y	A28352T
EPI_ISL_444396	28354	C	A	28354	29903	N	N27K	SNP	Nucleocapsid protein	N:N27K	C28354A
EPI_ISL_450514	28354	C	T	28353	29902	N	N27N	SNP_silent	Nucleocapsid protein	N:N27N	C28354T
EPI_ISL_473764	28354	C	T	28300	29782	N	N27N	SNP_silent	Nucleocapsid protein	N:N27N	C28354T
EPI_ISL_434680	28355	C	G	28352	29900	N	Q28E	SNP	Nucleocapsid protein	N:Q28E	C28355G
EPI_ISL_434710	28355	C	G	28317	29802	N	Q28E	SNP	Nucleocapsid protein	N:Q28E	C28355G
EPI_ISL_435163	28355	C	G	28317	29760	N	Q28E	SNP	Nucleocapsid protein	N:Q28E	C28355G
EPI_ISL_435164	28355	C	G	28317	29798	N	Q28E	SNP	Nucleocapsid protein	N:Q28E	C28355G
EPI_ISL_435165	28355	C	G	28317	29743	N	Q28E	SNP	Nucleocapsid protein	N:Q28E	C28355G
EPI_ISL_435166	28355	C	G	28317	29627	N	Q28E	SNP	Nucleocapsid protein	N:Q28E	C28355G
EPI_ISL_437196	28355	C	G	28317	29798	N	Q28E	SNP	Nucleocapsid protein	N:Q28E	C28355G
EPI_ISL_437337	28355	C	G	28317	29813	N	Q28E	SNP	Nucleocapsid protein	N:Q28E	C28355G
EPI_ISL_454539	28355	C	T	28355	29903	N	Q28*	SNP_stop	Nucleocapsid protein	N:Q28*	C28355T
EPI_ISL_447956	28356	A	G	28347	29894	N	Q28R	SNP	Nucleocapsid protein	N:Q28R	A28356G
EPI_ISL_454523	28356	A	T	28356	29903	N	Q28L	SNP	Nucleocapsid protein	N:Q28L	A28356T
EPI_ISL_423060	28356	A	G	28356	29903	N	Q28R	SNP	Nucleocapsid protein	N:Q28R	A28356G
EPI_ISL_437366	28356	A	G	28354	29901	N	Q28R	SNP	Nucleocapsid protein	N:Q28R	A28356G
EPI_ISL_454958	28356	A	G	28356	29903	N	Q28R	SNP	Nucleocapsid protein	N:Q28R	A28356G
EPI_ISL_454957	28356	A	G	28356	29903	N	Q28R	SNP	Nucleocapsid protein	N:Q28R	A28356G
EPI_ISL_456665	28357	G	T	28357	29903	N	Q28H	SNP	Nucleocapsid protein	N:Q28H	G28357T
EPI_ISL_430357	28357	G	C	28357	29903	N	Q28H	SNP	Nucleocapsid protein	N:Q28H	G28357C
EPI_ISL_459605	28357	G	T	28300	29779	N	Q28H	SNP	Nucleocapsid protein	N:Q28H	G28357T
EPI_ISL_417281	28357	G	T	28357	29903	N	Q28H	SNP	Nucleocapsid protein	N:Q28H	G28357T
EPI_ISL_435512	28359	A	G	28359	29903	N	N29S	SNP	Nucleocapsid protein	N:N29S	A28359G
EPI_ISL_467405	28359	A	G	28359	29903	N	N29S	SNP	Nucleocapsid protein	N:N29S	A28359G
EPI_ISL_422883	28359	A	C	28302	29772	N	N29T	SNP	Nucleocapsid protein	N:N29T	A28359C
EPI_ISL_460215	28360	T	C	28326	29828	N	N29N	SNP_silent	Nucleocapsid protein	N:N29N	T28360C
EPI_ISL_460403	28360	T	C	28354	29872	N	N29N	SNP_silent	Nucleocapsid protein	N:N29N	T28360C
EPI_ISL_450648	28361	G	A	28361	29903	N	G30R	SNP	Nucleocapsid protein	N:G30R	G28361A
EPI_ISL_463956	28361	G	A	28361	29903	N	G30R	SNP	Nucleocapsid protein	N:G30R	G28361A
EPI_ISL_425982	28361	G	C	28361	29903	N	G30R	SNP	Nucleocapsid protein	N:G30R	G28361C
EPI_ISL_450312	28361	G	A	28361	29903	N	G30R	SNP	Nucleocapsid protein	N:G30R	G28361A
EPI_ISL_450650	28361	G	A	28361	29903	N	G30R	SNP	Nucleocapsid protein	N:G30R	G28361A
EPI_ISL_457620	28361	G	A	28361	29903	N	G30R	SNP	Nucleocapsid protein	N:G30R	G28361A
EPI_ISL_461708	28361	G	C	28361	29903	N	G30R	SNP	Nucleocapsid protein	N:G30R	G28361C
EPI_ISL_474344	28361	G	C	28323	29865	N	G30R	SNP	Nucleocapsid protein	N:G30R	G28361C
EPI_ISL_452195	28362	G	T	28337	29805	N	G30V	SNP	Nucleocapsid protein	N:G30V	G28362T
EPI_ISL_444749	28362	G	T	28362	29903	N	G30V	SNP	Nucleocapsid protein	N:G30V	G28362T
EPI_ISL_453755	28362	G	T	28362	29903	N	G30V	SNP	Nucleocapsid protein	N:G30V	G28362T
EPI_ISL_473138	28362	G	T	28326	29867	N	G30V	SNP	Nucleocapsid protein	N:G30V	G28362T
EPI_ISL_425452	28362	G	T	28362	29903	N	G30V	SNP	Nucleocapsid protein	N:G30V	G28362T
EPI_ISL_439590	28362	G	T	28308	29812	N	G30V	SNP	Nucleocapsid protein	N:G30V	G28362T
EPI_ISL_440821	28362	G	T	28308	29782	N	G30V	SNP	Nucleocapsid protein	N:G30V	G28362T
EPI_ISL_441153	28362	G	T	28308	29782	N	G30V	SNP	Nucleocapsid protein	N:G30V	G28362T
EPI_ISL_443019	28362	G	T	28308	29782	N	G30V	SNP	Nucleocapsid protein	N:G30V	G28362T
EPI_ISL_463400	28362	G	C	28362	29903	N	G30A	SNP	Nucleocapsid protein	N:G30A	G28362C
EPI_ISL_457542	28363	A	G	28352	29892	N	G30G	SNP_silent	Nucleocapsid protein	N:G30G	A28363G
EPI_ISL_463079	28364	G	C	28364	29364	N	E31Q	SNP	Nucleocapsid protein	N:E31Q	G28364C
EPI_ISL_449829	28366	A	C	28342	29879	N	E31D	SNP	Nucleocapsid protein	N:E31D	A28366C
EPI_ISL_433649	28367	C	T	28313	29782	N	R32C	SNP	Nucleocapsid protein	N:R32C	C28367T
EPI_ISL_457877	28367	C	T	28313	29782	N	R32C	SNP	Nucleocapsid protein	N:R32C	C28367T
EPI_ISL_464050	28368	G	A	28368	29903	N	R32H	SNP	Nucleocapsid protein	N:R32H	G28368A
EPI_ISL_418348	28368	G	A	28367	29881	N	R32H	SNP	Nucleocapsid protein	N:R32H	G28368A
EPI_ISL_418356	28368	G	A	28367	29881	N	R32H	SNP	Nucleocapsid protein	N:R32H	G28368A
EPI_ISL_418374	28368	G	A	28367	29881	N	R32H	SNP	Nucleocapsid protein	N:R32H	G28368A
EPI_ISL_430856	28368	G	A	28368	29903	N	R32H	SNP	Nucleocapsid protein	N:R32H	G28368A
EPI_ISL_451806	28368	G	A	28368	29903	N	R32H	SNP	Nucleocapsid protein	N:R32H	G28368A
EPI_ISL_454359	28368	G	A	28368	29840	N	R32H	SNP	Nucleocapsid protein	N:R32H	G28368A
EPI_ISL_459871	28368	G	A	28343	29828	N	R32H	SNP	Nucleocapsid protein	N:R32H	G28368A
EPI_ISL_459884	28368	G	A	28343	29834	N	R32H	SNP	Nucleocapsid protein	N:R32H	G28368A
EPI_ISL_461683	28368	G	A	28314	29782	N	R32H	SNP	Nucleocapsid protein	N:R32H	G28368A
EPI_ISL_461692	28368	G	A	28314	29782	N	R32H	SNP	Nucleocapsid protein	N:R32H	G28368A
EPI_ISL_463973	28368	G	A	28281	29767	N	R32H	SNP	Nucleocapsid protein	N:R32H	G28368A
EPI_ISL_463982	28368	G	A	28362	29855	N	R32H	SNP	Nucleocapsid protein	N:R32H	G28368A
EPI_ISL_463992	28368	G	A	28365	29851	N	R32H	SNP	Nucleocapsid protein	N:R32H	G28368A
EPI_ISL_463997	28368	G	A	28368	29903	N	R32H	SNP	Nucleocapsid protein	N:R32H	G28368A
EPI_ISL_463998	28368	G	A	28368	29903	N	R32H	SNP	Nucleocapsid protein	N:R32H	G28368A
EPI_ISL_464004	28368	G	A	28368	29903	N	R32H	SNP	Nucleocapsid protein	N:R32H	G28368A
EPI_ISL_464014	28368	G	A	28368	29903	N	R32H	SNP	Nucleocapsid protein	N:R32H	G28368A
EPI_ISL_464018	28368	G	A	28368	29903	N	R32H	SNP	Nucleocapsid protein	N:R32H	G28368A
EPI_ISL_464021	28368	G	A	28368	29903	N	R32H	SNP	Nucleocapsid protein	N:R32H	G28368A
EPI_ISL_464024	28368	G	A	28368	29903	N	R32H	SNP	Nucleocapsid protein	N:R32H	G28368A
EPI_ISL_464026	28368	G	A	28368	29903	N	R32H	SNP	Nucleocapsid protein	N:R32H	G28368A
EPI_ISL_464030	28368	G	A	28368	29903	N	R32H	SNP	Nucleocapsid protein	N:R32H	G28368A
EPI_ISL_464037	28368	G	A	28368	29903	N	R32H	SNP	Nucleocapsid protein	N:R32H	G28368A
EPI_ISL_464038	28368	G	A	28368	29903	N	R32H	SNP	Nucleocapsid protein	N:R32H	G28368A
EPI_ISL_464040	28368	G	A	28368	29903	N	R32H	SNP	Nucleocapsid protein	N:R32H	G28368A
EPI_ISL_464046	28368	G	A	28368	29903	N	R32H	SNP	Nucleocapsid protein	N:R32H	G28368A
EPI_ISL_464048	28368	G	A	28368	29903	N	R32H	SNP	Nucleocapsid protein	N:R32H	G28368A
EPI_ISL_464054	28368	G	A	28368	29903	N	R32H	SNP	Nucleocapsid protein	N:R32H	G28368A
EPI_ISL_464059	28368	G	A	28368	29903	N	R32H	SNP	Nucleocapsid protein	N:R32H	G28368A
EPI_ISL_464061	28368	G	A	28368	29903	N	R32H	SNP	Nucleocapsid protein	N:R32H	G28368A
EPI_ISL_468619	28368	G	T	28361	29850	N	R32L	SNP	Nucleocapsid protein	N:R32L	G28368T
EPI_ISL_468357	28368	G	T	28333	29816	N	R32L	SNP	Nucleocapsid protein	N:R32L	G28368T
EPI_ISL_468380	28368	G	T	28330	29816	N	R32L	SNP	Nucleocapsid protein	N:R32L	G28368T
EPI_ISL_418188	28369	C	T	28369	29903	N	R32R	SNP_silent	Nucleocapsid protein	N:R32R	C28369T
EPI_ISL_446757	28369	C	T	28365	29899	N	R32R	SNP_silent	Nucleocapsid protein	N:R32R	C28369T
EPI_ISL_474106	28369	C	T	28339	29873	N	R32R	SNP_silent	Nucleocapsid protein	N:R32R	C28369T
EPI_ISL_474397	28369	C	T	28368	29902	N	R32R	SNP_silent	Nucleocapsid protein	N:R32R	C28369T
EPI_ISL_460859	28370	A	G	28316	29775	N	S33G	SNP	Nucleocapsid protein	N:S33G	A28370G
EPI_ISL_468857	28370	A	G	28370	29903	N	S33G	SNP	Nucleocapsid protein	N:S33G	A28370G
EPI_ISL_473051	28371	G	T	28367	29899	N	S33I	SNP	Nucleocapsid protein	N:S33I	G28371T
EPI_ISL_473305	28371	G	T	28369	29901	N	S33I	SNP	Nucleocapsid protein	N:S33I	G28371T
EPI_ISL_473976	28371	G	T	28370	29902	N	S33I	SNP	Nucleocapsid protein	N:S33I	G28371T
EPI_ISL_474045	28371	G	T	28368	29900	N	S33I	SNP	Nucleocapsid protein	N:S33I	G28371T
EPI_ISL_474173	28371	G	T	28364	29896	N	S33I	SNP	Nucleocapsid protein	N:S33I	G28371T
EPI_ISL_473381	28371	G	T	28362	29894	N	S33I	SNP	Nucleocapsid protein	N:S33I	G28371T
EPI_ISL_474161	28371	G	T	28341	29873	N	S33I	SNP	Nucleocapsid protein	N:S33I	G28371T
EPI_ISL_474477	28371	G	T	28371	29903	N	S33I	SNP	Nucleocapsid protein	N:S33I	G28371T
EPI_ISL_474478	28371	G	T	28371	29903	N	S33I	SNP	Nucleocapsid protein	N:S33I	G28371T
EPI_ISL_474553	28371	G	T	28333	29865	N	S33I	SNP	Nucleocapsid protein	N:S33I	G28371T
EPI_ISL_422024	28371	G	T	28337	29869	N	S33I	SNP	Nucleocapsid protein	N:S33I	G28371T
EPI_ISL_422212	28371	G	T	28369	29901	N	S33I	SNP	Nucleocapsid protein	N:S33I	G28371T
EPI_ISL_422216	28371	G	T	28371	29903	N	S33I	SNP	Nucleocapsid protein	N:S33I	G28371T
EPI_ISL_422224	28371	G	T	28371	29903	N	S33I	SNP	Nucleocapsid protein	N:S33I	G28371T
EPI_ISL_428912	28371	G	T	28371	29903	N	S33I	SNP	Nucleocapsid protein	N:S33I	G28371T
EPI_ISL_435051	28371	G	T	28371	29903	N	S33I	SNP	Nucleocapsid protein	N:S33I	G28371T
EPI_ISL_435052	28371	G	T	28371	29903	N	S33I	SNP	Nucleocapsid protein	N:S33I	G28371T
EPI_ISL_443846	28371	G	T	28317	29782	N	S33I	SNP	Nucleocapsid protein	N:S33I	G28371T
EPI_ISL_446024	28371	G	T	28367	29889	N	S33I	SNP	Nucleocapsid protein	N:S33I	G28371T
EPI_ISL_447337	28371	G	T	28372	29892	N	S33I	SNP	Nucleocapsid protein	N:S33I	G28371T
EPI_ISL_472436	28371	G	T	28352	29884	N	S33I	SNP	Nucleocapsid protein	N:S33I	G28371T
EPI_ISL_472480	28371	G	T	28359	29891	N	S33I	SNP	Nucleocapsid protein	N:S33I	G28371T
EPI_ISL_472482	28371	G	T	28367	29899	N	S33I	SNP	Nucleocapsid protein	N:S33I	G28371T
EPI_ISL_472489	28371	G	T	28363	29895	N	S33I	SNP	Nucleocapsid protein	N:S33I	G28371T
EPI_ISL_472494	28371	G	T	28359	29891	N	S33I	SNP	Nucleocapsid protein	N:S33I	G28371T
EPI_ISL_472497	28371	G	T	28370	29902	N	S33I	SNP	Nucleocapsid protein	N:S33I	G28371T
EPI_ISL_472522	28371	G	T	28356	29858	N	S33I	SNP	Nucleocapsid protein	N:S33I	G28371T
EPI_ISL_472544	28371	G	T	28357	29889	N	S33I	SNP	Nucleocapsid protein	N:S33I	G28371T
EPI_ISL_472576	28371	G	T	28366	29898	N	S33I	SNP	Nucleocapsid protein	N:S33I	G28371T
EPI_ISL_472616	28371	G	T	28341	29873	N	S33I	SNP	Nucleocapsid protein	N:S33I	G28371T
EPI_ISL_472617	28371	G	T	28350	29882	N	S33I	SNP	Nucleocapsid protein	N:S33I	G28371T
EPI_ISL_472645	28371	G	T	28340	29872	N	S33I	SNP	Nucleocapsid protein	N:S33I	G28371T
EPI_ISL_472651	28371	G	T	28334	29866	N	S33I	SNP	Nucleocapsid protein	N:S33I	G28371T
EPI_ISL_472662	28371	G	T	28333	29865	N	S33I	SNP	Nucleocapsid protein	N:S33I	G28371T
EPI_ISL_472689	28371	G	T	28333	29865	N	S33I	SNP	Nucleocapsid protein	N:S33I	G28371T
EPI_ISL_472710	28371	G	T	28333	29865	N	S33I	SNP	Nucleocapsid protein	N:S33I	G28371T
EPI_ISL_472733	28371	G	T	28367	29899	N	S33I	SNP	Nucleocapsid protein	N:S33I	G28371T
EPI_ISL_472763	28371	G	T	28352	29884	N	S33I	SNP	Nucleocapsid protein	N:S33I	G28371T
EPI_ISL_472795	28371	G	T	28324	29856	N	S33I	SNP	Nucleocapsid protein	N:S33I	G28371T
EPI_ISL_472811	28371	G	T	28336	29868	N	S33I	SNP	Nucleocapsid protein	N:S33I	G28371T
EPI_ISL_472856	28371	G	T	28369	29901	N	S33I	SNP	Nucleocapsid protein	N:S33I	G28371T
EPI_ISL_472869	28371	G	T	28338	29870	N	S33I	SNP	Nucleocapsid protein	N:S33I	G28371T
EPI_ISL_472873	28371	G	T	28371	29903	N	S33I	SNP	Nucleocapsid protein	N:S33I	G28371T
EPI_ISL_472920	28371	G	T	28341	29873	N	S33I	SNP	Nucleocapsid protein	N:S33I	G28371T
EPI_ISL_472953	28371	G	T	28362	29894	N	S33I	SNP	Nucleocapsid protein	N:S33I	G28371T
EPI_ISL_472985	28371	G	T	28334	29866	N	S33I	SNP	Nucleocapsid protein	N:S33I	G28371T
EPI_ISL_472999	28371	G	T	28371	29903	N	S33I	SNP	Nucleocapsid protein	N:S33I	G28371T
EPI_ISL_473005	28371	G	T	28366	29898	N	S33I	SNP	Nucleocapsid protein	N:S33I	G28371T
EPI_ISL_473019	28371	G	T	28332	29864	N	S33I	SNP	Nucleocapsid protein	N:S33I	G28371T
EPI_ISL_473021	28371	G	T	28370	29902	N	S33I	SNP	Nucleocapsid protein	N:S33I	G28371T
EPI_ISL_473028	28371	G	T	28371	29902	N	S33I	SNP	Nucleocapsid protein	N:S33I	G28371T
EPI_ISL_473033	28371	G	T	28369	29901	N	S33I	SNP	Nucleocapsid protein	N:S33I	G28371T
EPI_ISL_473044	28371	G	T	28367	29899	N	S33I	SNP	Nucleocapsid protein	N:S33I	G28371T
EPI_ISL_473055	28371	G	T	28367	29899	N	S33I	SNP	Nucleocapsid protein	N:S33I	G28371T
EPI_ISL_473078	28371	G	T	28340	29872	N	S33I	SNP	Nucleocapsid protein	N:S33I	G28371T
EPI_ISL_473102	28371	G	T	28371	29903	N	S33I	SNP	Nucleocapsid protein	N:S33I	G28371T
EPI_ISL_473114	28371	G	T	28347	29879	N	S33I	SNP	Nucleocapsid protein	N:S33I	G28371T
EPI_ISL_473131	28371	G	T	28335	29867	N	S33I	SNP	Nucleocapsid protein	N:S33I	G28371T
EPI_ISL_473141	28371	G	T	28360	29892	N	S33I	SNP	Nucleocapsid protein	N:S33I	G28371T
EPI_ISL_473147	28371	G	T	28371	29903	N	S33I	SNP	Nucleocapsid protein	N:S33I	G28371T
EPI_ISL_473150	28371	G	T	28370	29902	N	S33I	SNP	Nucleocapsid protein	N:S33I	G28371T
EPI_ISL_473158	28371	G	T	28367	29899	N	S33I	SNP	Nucleocapsid protein	N:S33I	G28371T
EPI_ISL_473167	28371	G	T	28336	29868	N	S33I	SNP	Nucleocapsid protein	N:S33I	G28371T
EPI_ISL_473186	28371	G	T	28367	29899	N	S33I	SNP	Nucleocapsid protein	N:S33I	G28371T
EPI_ISL_473227	28371	G	T	28335	29867	N	S33I	SNP	Nucleocapsid protein	N:S33I	G28371T
EPI_ISL_473282	28371	G	T	28338	29868	N	S33I	SNP	Nucleocapsid protein	N:S33I	G28371T
EPI_ISL_473975	28371	G	T	28367	29899	N	S33I	SNP	Nucleocapsid protein	N:S33I	G28371T
EPI_ISL_473993	28371	G	T	28362	29894	N	S33I	SNP	Nucleocapsid protein	N:S33I	G28371T
EPI_ISL_474048	28371	G	T	28362	29894	N	S33I	SNP	Nucleocapsid protein	N:S33I	G28371T
EPI_ISL_474051	28371	G	T	28347	29879	N	S33I	SNP	Nucleocapsid protein	N:S33I	G28371T
EPI_ISL_474056	28371	G	T	28367	29899	N	S33I	SNP	Nucleocapsid protein	N:S33I	G28371T
EPI_ISL_474080	28371	G	T	28369	29901	N	S33I	SNP	Nucleocapsid protein	N:S33I	G28371T
EPI_ISL_474084	28371	G	T	28352	29884	N	S33I	SNP	Nucleocapsid protein	N:S33I	G28371T
EPI_ISL_474101	28371	G	T	28368	29900	N	S33I	SNP	Nucleocapsid protein	N:S33I	G28371T
EPI_ISL_474130	28371	G	T	28334	29866	N	S33I	SNP	Nucleocapsid protein	N:S33I	G28371T
EPI_ISL_474131	28371	G	T	28341	29873	N	S33I	SNP	Nucleocapsid protein	N:S33I	G28371T
EPI_ISL_474154	28371	G	T	28341	29873	N	S33I	SNP	Nucleocapsid protein	N:S33I	G28371T
EPI_ISL_474172	28371	G	T	28338	29870	N	S33I	SNP	Nucleocapsid protein	N:S33I	G28371T
EPI_ISL_474201	28371	G	T	28361	29893	N	S33I	SNP	Nucleocapsid protein	N:S33I	G28371T
EPI_ISL_474216	28371	G	T	28371	29903	N	S33I	SNP	Nucleocapsid protein	N:S33I	G28371T
EPI_ISL_474221	28371	G	T	28339	29871	N	S33I	SNP	Nucleocapsid protein	N:S33I	G28371T
EPI_ISL_474528	28371	G	T	28367	29899	N	S33I	SNP	Nucleocapsid protein	N:S33I	G28371T
EPI_ISL_474566	28371	G	T	28370	29902	N	S33I	SNP	Nucleocapsid protein	N:S33I	G28371T
EPI_ISL_474582	28371	G	T	28333	29865	N	S33I	SNP	Nucleocapsid protein	N:S33I	G28371T
EPI_ISL_474584	28371	G	T	28360	29892	N	S33I	SNP	Nucleocapsid protein	N:S33I	G28371T
EPI_ISL_474590	28371	G	T	28354	29886	N	S33I	SNP	Nucleocapsid protein	N:S33I	G28371T
EPI_ISL_474598	28371	G	T	28335	29867	N	S33I	SNP	Nucleocapsid protein	N:S33I	G28371T
EPI_ISL_474629	28371	G	T	28333	29865	N	S33I	SNP	Nucleocapsid protein	N:S33I	G28371T
EPI_ISL_474633	28371	G	T	28362	29894	N	S33I	SNP	Nucleocapsid protein	N:S33I	G28371T
EPI_ISL_474672	28371	G	T	28341	29873	N	S33I	SNP	Nucleocapsid protein	N:S33I	G28371T
EPI_ISL_474706	28371	G	T	28350	29882	N	S33I	SNP	Nucleocapsid protein	N:S33I	G28371T
EPI_ISL_474711	28371	G	T	28367	29899	N	S33I	SNP	Nucleocapsid protein	N:S33I	G28371T
EPI_ISL_474723	28371	G	T	28333	29865	N	S33I	SNP	Nucleocapsid protein	N:S33I	G28371T
EPI_ISL_474770	28371	G	T	28333	29865	N	S33I	SNP	Nucleocapsid protein	N:S33I	G28371T
EPI_ISL_474784	28371	G	T	28371	29903	N	S33I	SNP	Nucleocapsid protein	N:S33I	G28371T
EPI_ISL_474787	28371	G	T	28350	29882	N	S33I	SNP	Nucleocapsid protein	N:S33I	G28371T
EPI_ISL_474792	28371	G	T	28363	29895	N	S33I	SNP	Nucleocapsid protein	N:S33I	G28371T
EPI_ISL_437266	28371	G	A	28371	29903	N	S33N	SNP	Nucleocapsid protein	N:S33N	G28371A
EPI_ISL_455075	28371	G	T	28105	29408	N	S33I	SNP	Nucleocapsid protein	N:S33I	G28371T
EPI_ISL_445055	28373	G	T	28373	29868	N	G34W	SNP	Nucleocapsid protein	N:G34W	G28373T
EPI_ISL_418260	28373	G	T	28181	29706	N	G34W	SNP	Nucleocapsid protein	N:G34W	G28373T
EPI_ISL_418360	28373	G	T	28372	29881	N	G34W	SNP	Nucleocapsid protein	N:G34W	G28373T
EPI_ISL_421879	28373	G	T	28373	29903	N	G34W	SNP	Nucleocapsid protein	N:G34W	G28373T
EPI_ISL_429717	28373	G	T	28373	29856	N	G34W	SNP	Nucleocapsid protein	N:G34W	G28373T
EPI_ISL_435379	28373	G	T	28356	29886	N	G34W	SNP	Nucleocapsid protein	N:G34W	G28373T
EPI_ISL_436919	28373	GG	TT	28333	29863	N	G34L	SNP	Nucleocapsid protein	N:G34L	GG28373TT
EPI_ISL_436928	28373	GG	TT	28363	29893	N	G34L	SNP	Nucleocapsid protein	N:G34L	GG28373TT
EPI_ISL_446116	28373	G	T	28361	29891	N	G34W	SNP	Nucleocapsid protein	N:G34W	G28373T
EPI_ISL_448874	28373	G	T	28373	29903	N	G34W	SNP	Nucleocapsid protein	N:G34W	G28373T
EPI_ISL_450296	28373	G	T	28373	29903	N	G34W	SNP	Nucleocapsid protein	N:G34W	G28373T
EPI_ISL_450308	28373	G	T	28373	29903	N	G34W	SNP	Nucleocapsid protein	N:G34W	G28373T
EPI_ISL_451683	28373	G	T	28373	29903	N	G34W	SNP	Nucleocapsid protein	N:G34W	G28373T
EPI_ISL_464138	28373	G	T	28373	29903	N	G34W	SNP	Nucleocapsid protein	N:G34W	G28373T
EPI_ISL_469059	28373	G	T	28373	29903	N	G34W	SNP	Nucleocapsid protein	N:G34W	G28373T
EPI_ISL_470712	28373	G	T	28343	29836	N	G34W	SNP	Nucleocapsid protein	N:G34W	G28373T
EPI_ISL_474552	28373	G	T	28362	29892	N	G34W	SNP	Nucleocapsid protein	N:G34W	G28373T
EPI_ISL_444268	28373	G	T	28373	29903	N	G34W	SNP	Nucleocapsid protein	N:G34W	G28373T
EPI_ISL_420622	28374	G	A	28376	29874	N	G34E	SNP	Nucleocapsid protein	N:G34E	G28374A
EPI_ISL_425899	28374	G	A	28374	29903	N	G34E	SNP	Nucleocapsid protein	N:G34E	G28374A
EPI_ISL_426017	28374	G	A	28374	29903	N	G34E	SNP	Nucleocapsid protein	N:G34E	G28374A
EPI_ISL_428890	28374	G	A	28374	29903	N	G34E	SNP	Nucleocapsid protein	N:G34E	G28374A
EPI_ISL_433131	28374	G	A	28374	29903	N	G34E	SNP	Nucleocapsid protein	N:G34E	G28374A
EPI_ISL_433407	28374	G	A	28374	29903	N	G34E	SNP	Nucleocapsid protein	N:G34E	G28374A
EPI_ISL_439159	28374	G	A	28374	29903	N	G34E	SNP	Nucleocapsid protein	N:G34E	G28374A
EPI_ISL_439246	28374	G	A	28374	29903	N	G34E	SNP	Nucleocapsid protein	N:G34E	G28374A
EPI_ISL_440565	28374	G	A	28320	29849	N	G34E	SNP	Nucleocapsid protein	N:G34E	G28374A
EPI_ISL_448479	28374	G	A	28374	29903	N	G34E	SNP	Nucleocapsid protein	N:G34E	G28374A
EPI_ISL_449078	28374	G	T	28336	29865	N	G34V	SNP	Nucleocapsid protein	N:G34V	G28374T
EPI_ISL_459641	28374	G	A	28320	29782	N	G34E	SNP	Nucleocapsid protein	N:G34E	G28374A
EPI_ISL_466325	28374	G	A	28374	29903	N	G34E	SNP	Nucleocapsid protein	N:G34E	G28374A
EPI_ISL_436228	28374	G	T	28326	29638	N	G34V	SNP	Nucleocapsid protein	N:G34V	G28374T
EPI_ISL_436273	28374	G	T	28322	29795	N	G34V	SNP	Nucleocapsid protein	N:G34V	G28374T
EPI_ISL_438492	28375	G	A	28321	29782	N	G34G	SNP_silent	Nucleocapsid protein	N:G34G	G28375A
EPI_ISL_472072	28375	G	T	28345	29836	N	G34G	SNP_silent	Nucleocapsid protein	N:G34G	G28375T
EPI_ISL_461456	28376	G	T	28371	29916	N	A35S	SNP	Nucleocapsid protein	N:A35S	G28376T
EPI_ISL_461458	28376	G	T	28370	29915	N	A35S	SNP	Nucleocapsid protein	N:A35S	G28376T
EPI_ISL_461463	28376	G	T	28369	29914	N	A35S	SNP	Nucleocapsid protein	N:A35S	G28376T
EPI_ISL_461464	28376	G	T	28368	29913	N	A35S	SNP	Nucleocapsid protein	N:A35S	G28376T
EPI_ISL_461473	28376	G	T	28374	29919	N	A35S	SNP	Nucleocapsid protein	N:A35S	G28376T
EPI_ISL_461461	28376	G	T	28349	29894	N	A35S	SNP	Nucleocapsid protein	N:A35S	G28376T
EPI_ISL_432692	28376	G	T	28376	29903	N	A35S	SNP	Nucleocapsid protein	N:A35S	G28376T
EPI_ISL_435483	28376	G	T	28376	29903	N	A35S	SNP	Nucleocapsid protein	N:A35S	G28376T
EPI_ISL_450162	28376	G	T	28321	29724	N	A35S	SNP	Nucleocapsid protein	N:A35S	G28376T
EPI_ISL_450164	28376	G	T	28324	29727	N	A35S	SNP	Nucleocapsid protein	N:A35S	G28376T
EPI_ISL_451447	28376	G	T	28376	29903	N	A35S	SNP	Nucleocapsid protein	N:A35S	G28376T
EPI_ISL_461450	28376	G	T	28344	29889	N	A35S	SNP	Nucleocapsid protein	N:A35S	G28376T
EPI_ISL_461451	28376	G	T	28348	29893	N	A35S	SNP	Nucleocapsid protein	N:A35S	G28376T
EPI_ISL_461452	28376	G	T	28366	29911	N	A35S	SNP	Nucleocapsid protein	N:A35S	G28376T
EPI_ISL_461453	28376	G	T	28340	29885	N	A35S	SNP	Nucleocapsid protein	N:A35S	G28376T
EPI_ISL_461454	28376	G	T	28347	29892	N	A35S	SNP	Nucleocapsid protein	N:A35S	G28376T
EPI_ISL_461455	28376	G	T	28361	29907	N	A35S	SNP	Nucleocapsid protein	N:A35S	G28376T
EPI_ISL_461457	28376	G	T	28358	29905	N	A35S	SNP	Nucleocapsid protein	N:A35S	G28376T
EPI_ISL_461459	28376	G	T	28356	29901	N	A35S	SNP	Nucleocapsid protein	N:A35S	G28376T
EPI_ISL_461460	28376	G	T	28341	29868	N	A35S	SNP	Nucleocapsid protein	N:A35S	G28376T
EPI_ISL_461462	28376	G	T	28342	29879	N	A35S	SNP	Nucleocapsid protein	N:A35S	G28376T
EPI_ISL_461465	28376	G	T	28338	29871	N	A35S	SNP	Nucleocapsid protein	N:A35S	G28376T
EPI_ISL_461467	28376	G	T	28352	29885	N	A35S	SNP	Nucleocapsid protein	N:A35S	G28376T
EPI_ISL_461468	28376	G	T	28354	29901	N	A35S	SNP	Nucleocapsid protein	N:A35S	G28376T
EPI_ISL_461469	28376	G	T	28360	29905	N	A35S	SNP	Nucleocapsid protein	N:A35S	G28376T
EPI_ISL_461470	28376	G	T	28360	29905	N	A35S	SNP	Nucleocapsid protein	N:A35S	G28376T
EPI_ISL_461471	28376	G	T	28361	29906	N	A35S	SNP	Nucleocapsid protein	N:A35S	G28376T
EPI_ISL_461472	28376	G	T	28359	29904	N	A35S	SNP	Nucleocapsid protein	N:A35S	G28376T
EPI_ISL_461474	28376	G	T	28360	29905	N	A35S	SNP	Nucleocapsid protein	N:A35S	G28376T
EPI_ISL_461475	28376	G	T	28350	29877	N	A35S	SNP	Nucleocapsid protein	N:A35S	G28376T
EPI_ISL_461477	28376	G	T	28357	29884	N	A35S	SNP	Nucleocapsid protein	N:A35S	G28376T
EPI_ISL_461466	28376	G	T	28228	29773	N	A35S	SNP	Nucleocapsid protein	N:A35S	G28376T
EPI_ISL_443910	28376	G	A	28319	29846	N	A35T	SNP	Nucleocapsid protein	N:A35T	G28376A
EPI_ISL_418069	28376	G	A	28327	29846	N	A35T	SNP	Nucleocapsid protein	N:A35T	G28376A
EPI_ISL_466099	28377	C	T	28377	29903	N	A35V	SNP	Nucleocapsid protein	N:A35V	C28377T
EPI_ISL_421803	28377	C	T	28377	29903	N	A35V	SNP	Nucleocapsid protein	N:A35V	C28377T
EPI_ISL_441202	28377	C	T	28323	29782	N	A35V	SNP	Nucleocapsid protein	N:A35V	C28377T
EPI_ISL_442326	28377	C	T	28323	29812	N	A35V	SNP	Nucleocapsid protein	N:A35V	C28377T
EPI_ISL_442834	28377	C	T	28323	29782	N	A35V	SNP	Nucleocapsid protein	N:A35V	C28377T
EPI_ISL_443022	28377	C	T	28323	29849	N	A35V	SNP	Nucleocapsid protein	N:A35V	C28377T
EPI_ISL_443360	28377	C	T	28323	29849	N	A35V	SNP	Nucleocapsid protein	N:A35V	C28377T
EPI_ISL_459112	28377	C	T	28323	29782	N	A35V	SNP	Nucleocapsid protein	N:A35V	C28377T
EPI_ISL_465312	28377	C	T	28377	29903	N	A35V	SNP	Nucleocapsid protein	N:A35V	C28377T
EPI_ISL_466086	28377	C	T	28377	29903	N	A35V	SNP	Nucleocapsid protein	N:A35V	C28377T
EPI_ISL_466098	28377	C	T	28377	29903	N	A35V	SNP	Nucleocapsid protein	N:A35V	C28377T
EPI_ISL_468055	28377	C	T	28352	29797	N	A35V	SNP	Nucleocapsid protein	N:A35V	C28377T
EPI_ISL_472270	28377	C	T	28377	29903	N	A35V	SNP	Nucleocapsid protein	N:A35V	C28377T
EPI_ISL_422644	28377	C	T	28323	29775	N	A35V	SNP	Nucleocapsid protein	N:A35V	C28377T
EPI_ISL_440089	28377	C	T	28323	29849	N	A35V	SNP	Nucleocapsid protein	N:A35V	C28377T
EPI_ISL_453499	28377	C	T	28377	29903	N	A35V	SNP	Nucleocapsid protein	N:A35V	C28377T
EPI_ISL_453513	28377	C	T	28377	29903	N	A35V	SNP	Nucleocapsid protein	N:A35V	C28377T
EPI_ISL_458595	28377	C	T	28323	29782	N	A35V	SNP	Nucleocapsid protein	N:A35V	C28377T
EPI_ISL_458638	28377	C	T	28323	29782	N	A35V	SNP	Nucleocapsid protein	N:A35V	C28377T
EPI_ISL_458642	28377	C	T	28323	29782	N	A35V	SNP	Nucleocapsid protein	N:A35V	C28377T
EPI_ISL_458667	28377	C	T	28323	29782	N	A35V	SNP	Nucleocapsid protein	N:A35V	C28377T
EPI_ISL_458685	28377	C	T	28323	29782	N	A35V	SNP	Nucleocapsid protein	N:A35V	C28377T
EPI_ISL_458705	28377	C	T	28323	29782	N	A35V	SNP	Nucleocapsid protein	N:A35V	C28377T
EPI_ISL_466326	28377	C	T	28377	29903	N	A35V	SNP	Nucleocapsid protein	N:A35V	C28377T
EPI_ISL_443276	28378	G	T	28378	29881	N	A35A	SNP_silent	Nucleocapsid protein	N:A35A	G28378T
EPI_ISL_443275	28378	G	A	28378	29881	N	A35A	SNP_silent	Nucleocapsid protein	N:A35A	G28378A
EPI_ISL_443279	28378	G	T	28378	29882	N	A35A	SNP_silent	Nucleocapsid protein	N:A35A	G28378T
EPI_ISL_416651	28378	G	T	28371	29893	N	A35A	SNP_silent	Nucleocapsid protein	N:A35A	G28378T
EPI_ISL_467946	28378	G	T	28371	29896	N	A35A	SNP_silent	Nucleocapsid protein	N:A35A	G28378T
EPI_ISL_431981	28378	G	T	28340	29865	N	A35A	SNP_silent	Nucleocapsid protein	N:A35A	G28378T
EPI_ISL_433835	28378	G	T	28378	29903	N	A35A	SNP_silent	Nucleocapsid protein	N:A35A	G28378T
EPI_ISL_438592	28378	G	T	28378	29903	N	A35A	SNP_silent	Nucleocapsid protein	N:A35A	G28378T
EPI_ISL_441568	28378	G	T	28324	29847	N	A35A	SNP_silent	Nucleocapsid protein	N:A35A	G28378T
EPI_ISL_442875	28378	G	T	28324	29849	N	A35A	SNP_silent	Nucleocapsid protein	N:A35A	G28378T
EPI_ISL_443269	28378	G	T	28378	29880	N	A35A	SNP_silent	Nucleocapsid protein	N:A35A	G28378T
EPI_ISL_443272	28378	G	T	28378	29881	N	A35A	SNP_silent	Nucleocapsid protein	N:A35A	G28378T
EPI_ISL_443273	28378	G	T	28378	29874	N	A35A	SNP_silent	Nucleocapsid protein	N:A35A	G28378T
EPI_ISL_443277	28378	G	T	28378	29867	N	A35A	SNP_silent	Nucleocapsid protein	N:A35A	G28378T
EPI_ISL_443281	28378	G	T	28378	29880	N	A35A	SNP_silent	Nucleocapsid protein	N:A35A	G28378T
EPI_ISL_443389	28378	G	T	28324	29821	N	A35A	SNP_silent	Nucleocapsid protein	N:A35A	G28378T
EPI_ISL_444248	28378	G	T	28378	29903	N	A35A	SNP_silent	Nucleocapsid protein	N:A35A	G28378T
EPI_ISL_444339	28378	G	T	28378	29903	N	A35A	SNP_silent	Nucleocapsid protein	N:A35A	G28378T
EPI_ISL_444398	28378	G	T	28378	29903	N	A35A	SNP_silent	Nucleocapsid protein	N:A35A	G28378T
EPI_ISL_447401	28378	G	T	28379	29892	N	A35A	SNP_silent	Nucleocapsid protein	N:A35A	G28378T
EPI_ISL_456256	28378	G	A	28378	29903	N	A35A	SNP_silent	Nucleocapsid protein	N:A35A	G28378A
EPI_ISL_456723	28378	G	T	28378	29903	N	A35A	SNP_silent	Nucleocapsid protein	N:A35A	G28378T
EPI_ISL_456725	28378	G	T	28378	29903	N	A35A	SNP_silent	Nucleocapsid protein	N:A35A	G28378T
EPI_ISL_456728	28378	G	T	28378	29903	N	A35A	SNP_silent	Nucleocapsid protein	N:A35A	G28378T
EPI_ISL_456730	28378	G	T	28378	29903	N	A35A	SNP_silent	Nucleocapsid protein	N:A35A	G28378T
EPI_ISL_461328	28378	G	T	28324	29775	N	A35A	SNP_silent	Nucleocapsid protein	N:A35A	G28378T
EPI_ISL_461332	28378	G	T	28324	29775	N	A35A	SNP_silent	Nucleocapsid protein	N:A35A	G28378T
EPI_ISL_461358	28378	G	T	28324	29775	N	A35A	SNP_silent	Nucleocapsid protein	N:A35A	G28378T
EPI_ISL_465515	28378	G	T	28378	29903	N	A35A	SNP_silent	Nucleocapsid protein	N:A35A	G28378T
EPI_ISL_468162	28378	G	C	28367	29880	N	A35A	SNP_silent	Nucleocapsid protein	N:A35A	G28378C
EPI_ISL_468480	28378	G	T	28362	29838	N	A35A	SNP_silent	Nucleocapsid protein	N:A35A	G28378T
EPI_ISL_473503	28378	G	T	28378	29903	N	A35A	SNP_silent	Nucleocapsid protein	N:A35A	G28378T
EPI_ISL_428796	28378	G	A	28378	29903	N	A35A	SNP_silent	Nucleocapsid protein	N:A35A	G28378A
EPI_ISL_419842	28378	G	T	28376	29901	N	A35A	SNP_silent	Nucleocapsid protein	N:A35A	G28378T
EPI_ISL_445434	28378	G	C	28378	29903	N	A35A	SNP_silent	Nucleocapsid protein	N:A35A	G28378C
EPI_ISL_454773	28378	G	T	28372	29891	N	A35A	SNP_silent	Nucleocapsid protein	N:A35A	G28378T
EPI_ISL_454781	28378	G	T	28372	29856	N	A35A	SNP_silent	Nucleocapsid protein	N:A35A	G28378T
EPI_ISL_446367	28378	G	A	28355	29880	N	A35A	SNP_silent	Nucleocapsid protein	N:A35A	G28378A
EPI_ISL_426096	28378	G	T	28320	29806	N	A35A	SNP_silent	Nucleocapsid protein	N:A35A	G28378T
EPI_ISL_459532	28378	G	T	28321	29779	N	A35A	SNP_silent	Nucleocapsid protein	N:A35A	G28378T
EPI_ISL_420249	28378	G	T	28378	29903	N	A35A	SNP_silent	Nucleocapsid protein	N:A35A	G28378T
EPI_ISL_413606	28378	G	T	28378	29882	N	A35A	SNP_silent	Nucleocapsid protein	N:A35A	G28378T
EPI_ISL_414483	28378	G	T	28378	29882	N	A35A	SNP_silent	Nucleocapsid protein	N:A35A	G28378T
EPI_ISL_419831	28378	G	T	28340	29865	N	A35A	SNP_silent	Nucleocapsid protein	N:A35A	G28378T
EPI_ISL_468039	28378	G	T	28340	29865	N	A35A	SNP_silent	Nucleocapsid protein	N:A35A	G28378T
EPI_ISL_418884	28378	G	T	28360	29884	N	A35A	SNP_silent	Nucleocapsid protein	N:A35A	G28378T
EPI_ISL_430194	28378	G	T	28378	29903	N	A35A	SNP_silent	Nucleocapsid protein	N:A35A	G28378T
EPI_ISL_430196	28378	G	T	28378	29903	N	A35A	SNP_silent	Nucleocapsid protein	N:A35A	G28378T
EPI_ISL_429774	28378	G	T	28378	29861	N	A35A	SNP_silent	Nucleocapsid protein	N:A35A	G28378T
EPI_ISL_439432	28380	G	A	28326	29783	N	R36Q	SNP	Nucleocapsid protein	N:R36Q	G28380A
EPI_ISL_456113	28380	G	A	28380	29903	N	R36Q	SNP	Nucleocapsid protein	N:R36Q	G28380A
EPI_ISL_458291	28380	G	T	28355	29835	N	R36L	SNP	Nucleocapsid protein	N:R36L	G28380T
EPI_ISL_423356	28380	G	T	28380	29903	N	R36L	SNP	Nucleocapsid protein	N:R36L	G28380T
EPI_ISL_423357	28380	G	T	28380	29903	N	R36L	SNP	Nucleocapsid protein	N:R36L	G28380T
EPI_ISL_425238	28380	G	T	28380	29903	N	R36L	SNP	Nucleocapsid protein	N:R36L	G28380T
EPI_ISL_443813	28380	G	A	28326	29849	N	R36Q	SNP	Nucleocapsid protein	N:R36Q	G28380A
EPI_ISL_459266	28380	G	T	28326	29782	N	R36L	SNP	Nucleocapsid protein	N:R36L	G28380T
EPI_ISL_433767	28381	A	T	28381	29903	N	R36R	SNP_silent	Nucleocapsid protein	N:R36R	A28381T
EPI_ISL_446018	28381	A	G	28343	29865	N	R36R	SNP_silent	Nucleocapsid protein	N:R36R	A28381G
EPI_ISL_432702	28382	T	C	28382	29903	N	S37P	SNP	Nucleocapsid protein	N:S37P	T28382C
EPI_ISL_446035	28382	T	C	28378	29899	N	S37P	SNP	Nucleocapsid protein	N:S37P	T28382C
EPI_ISL_446037	28382	T	C	28366	29887	N	S37P	SNP	Nucleocapsid protein	N:S37P	T28382C
EPI_ISL_452292	28382	T	C	28382	29903	N	S37P	SNP	Nucleocapsid protein	N:S37P	T28382C
EPI_ISL_466928	28382	T	C	28382	29903	N	S37P	SNP	Nucleocapsid protein	N:S37P	T28382C
EPI_ISL_472514	28382	T	C	28342	29863	N	S37P	SNP	Nucleocapsid protein	N:S37P	T28382C
EPI_ISL_472537	28382	T	C	28342	29863	N	S37P	SNP	Nucleocapsid protein	N:S37P	T28382C
EPI_ISL_472564	28382	T	C	28342	29863	N	S37P	SNP	Nucleocapsid protein	N:S37P	T28382C
EPI_ISL_472636	28382	T	C	28381	29902	N	S37P	SNP	Nucleocapsid protein	N:S37P	T28382C
EPI_ISL_472653	28382	T	C	28377	29895	N	S37P	SNP	Nucleocapsid protein	N:S37P	T28382C
EPI_ISL_472719	28382	T	C	28378	29899	N	S37P	SNP	Nucleocapsid protein	N:S37P	T28382C
EPI_ISL_472732	28382	T	C	28380	29901	N	S37P	SNP	Nucleocapsid protein	N:S37P	T28382C
EPI_ISL_472755	28382	T	C	28346	29867	N	S37P	SNP	Nucleocapsid protein	N:S37P	T28382C
EPI_ISL_472817	28382	T	C	28355	29876	N	S37P	SNP	Nucleocapsid protein	N:S37P	T28382C
EPI_ISL_472846	28382	T	C	28380	29901	N	S37P	SNP	Nucleocapsid protein	N:S37P	T28382C
EPI_ISL_472969	28382	T	C	28346	29867	N	S37P	SNP	Nucleocapsid protein	N:S37P	T28382C
EPI_ISL_473001	28382	T	C	28360	29881	N	S37P	SNP	Nucleocapsid protein	N:S37P	T28382C
EPI_ISL_473026	28382	T	C	28380	29901	N	S37P	SNP	Nucleocapsid protein	N:S37P	T28382C
EPI_ISL_473042	28382	T	C	28347	29868	N	S37P	SNP	Nucleocapsid protein	N:S37P	T28382C
EPI_ISL_473049	28382	T	C	28352	29873	N	S37P	SNP	Nucleocapsid protein	N:S37P	T28382C
EPI_ISL_473071	28382	T	C	28359	29880	N	S37P	SNP	Nucleocapsid protein	N:S37P	T28382C
EPI_ISL_473091	28382	T	C	28347	29868	N	S37P	SNP	Nucleocapsid protein	N:S37P	T28382C
EPI_ISL_473120	28382	T	C	28377	29898	N	S37P	SNP	Nucleocapsid protein	N:S37P	T28382C
EPI_ISL_473130	28382	T	C	28369	29890	N	S37P	SNP	Nucleocapsid protein	N:S37P	T28382C
EPI_ISL_473137	28382	T	C	28367	29888	N	S37P	SNP	Nucleocapsid protein	N:S37P	T28382C
EPI_ISL_473152	28382	T	C	28368	29889	N	S37P	SNP	Nucleocapsid protein	N:S37P	T28382C
EPI_ISL_473154	28382	T	C	28347	29868	N	S37P	SNP	Nucleocapsid protein	N:S37P	T28382C
EPI_ISL_473165	28382	T	C	28344	29865	N	S37P	SNP	Nucleocapsid protein	N:S37P	T28382C
EPI_ISL_473187	28382	T	C	28342	29863	N	S37P	SNP	Nucleocapsid protein	N:S37P	T28382C
EPI_ISL_473212	28382	T	C	28376	29897	N	S37P	SNP	Nucleocapsid protein	N:S37P	T28382C
EPI_ISL_473217	28382	T	C	28380	29901	N	S37P	SNP	Nucleocapsid protein	N:S37P	T28382C
EPI_ISL_473255	28382	T	C	28342	29863	N	S37P	SNP	Nucleocapsid protein	N:S37P	T28382C
EPI_ISL_473275	28382	T	C	28348	29869	N	S37P	SNP	Nucleocapsid protein	N:S37P	T28382C
EPI_ISL_473968	28382	T	C	28352	29873	N	S37P	SNP	Nucleocapsid protein	N:S37P	T28382C
EPI_ISL_473984	28382	T	C	28382	29903	N	S37P	SNP	Nucleocapsid protein	N:S37P	T28382C
EPI_ISL_473994	28382	T	C	28371	29892	N	S37P	SNP	Nucleocapsid protein	N:S37P	T28382C
EPI_ISL_474002	28382	T	C	28347	29868	N	S37P	SNP	Nucleocapsid protein	N:S37P	T28382C
EPI_ISL_474004	28382	T	C	28349	29870	N	S37P	SNP	Nucleocapsid protein	N:S37P	T28382C
EPI_ISL_474006	28382	T	C	28378	29899	N	S37P	SNP	Nucleocapsid protein	N:S37P	T28382C
EPI_ISL_474016	28382	T	C	28345	29866	N	S37P	SNP	Nucleocapsid protein	N:S37P	T28382C
EPI_ISL_474083	28382	T	C	28345	29866	N	S37P	SNP	Nucleocapsid protein	N:S37P	T28382C
EPI_ISL_474108	28382	T	C	28346	29867	N	S37P	SNP	Nucleocapsid protein	N:S37P	T28382C
EPI_ISL_474143	28382	T	C	28345	29866	N	S37P	SNP	Nucleocapsid protein	N:S37P	T28382C
EPI_ISL_474179	28382	T	C	28382	29903	N	S37P	SNP	Nucleocapsid protein	N:S37P	T28382C
EPI_ISL_474213	28382	T	C	28369	29890	N	S37P	SNP	Nucleocapsid protein	N:S37P	T28382C
EPI_ISL_474218	28382	T	C	28380	29901	N	S37P	SNP	Nucleocapsid protein	N:S37P	T28382C
EPI_ISL_474526	28382	T	C	28373	29894	N	S37P	SNP	Nucleocapsid protein	N:S37P	T28382C
EPI_ISL_474532	28382	T	C	28378	29899	N	S37P	SNP	Nucleocapsid protein	N:S37P	T28382C
EPI_ISL_474543	28382	T	C	28379	29900	N	S37P	SNP	Nucleocapsid protein	N:S37P	T28382C
EPI_ISL_474593	28382	T	C	28369	29890	N	S37P	SNP	Nucleocapsid protein	N:S37P	T28382C
EPI_ISL_474626	28382	T	C	28380	29901	N	S37P	SNP	Nucleocapsid protein	N:S37P	T28382C
EPI_ISL_474644	28382	T	C	28359	29880	N	S37P	SNP	Nucleocapsid protein	N:S37P	T28382C
EPI_ISL_474660	28382	T	C	28380	29901	N	S37P	SNP	Nucleocapsid protein	N:S37P	T28382C
EPI_ISL_474714	28382	T	C	28371	29892	N	S37P	SNP	Nucleocapsid protein	N:S37P	T28382C
EPI_ISL_474752	28382	T	C	28363	29884	N	S37P	SNP	Nucleocapsid protein	N:S37P	T28382C
EPI_ISL_474755	28382	T	C	28345	29866	N	S37P	SNP	Nucleocapsid protein	N:S37P	T28382C
EPI_ISL_474778	28382	T	C	28376	29897	N	S37P	SNP	Nucleocapsid protein	N:S37P	T28382C
EPI_ISL_474788	28382	T	C	28382	29903	N	S37P	SNP	Nucleocapsid protein	N:S37P	T28382C
EPI_ISL_474794	28382	T	C	28381	29902	N	S37P	SNP	Nucleocapsid protein	N:S37P	T28382C
EPI_ISL_474996	28382	T	C	28379	29900	N	S37P	SNP	Nucleocapsid protein	N:S37P	T28382C
EPI_ISL_472772	28382	T	C	28371	29892	N	S37P	SNP	Nucleocapsid protein	N:S37P	T28382C
EPI_ISL_452461	28382	T	C	28382	29903	N	S37P	SNP	Nucleocapsid protein	N:S37P	T28382C
EPI_ISL_452462	28382	T	C	28382	29903	N	S37P	SNP	Nucleocapsid protein	N:S37P	T28382C
EPI_ISL_455646	28383	C	T	28383	29903	N	S37L	SNP	Nucleocapsid protein	N:S37L	C28383T
EPI_ISL_465434	28383	C	T	28383	29903	N	S37L	SNP	Nucleocapsid protein	N:S37L	C28383T
EPI_ISL_465436	28383	C	T	28383	29903	N	S37L	SNP	Nucleocapsid protein	N:S37L	C28383T
EPI_ISL_470549	28383	C	T	28374	29894	N	S37L	SNP	Nucleocapsid protein	N:S37L	C28383T
EPI_ISL_454320	28383	C	T	28343	29763	N	S37L	SNP	Nucleocapsid protein	N:S37L	C28383T
EPI_ISL_443606	28386	A	C	28332	29782	N	K38T	SNP	Nucleocapsid protein	N:K38T	A28386C
EPI_ISL_433186	28390	A	G	28390	29903	N	Q39Q	SNP_silent	Nucleocapsid protein	N:Q39Q	A28390G
EPI_ISL_439253	28390	A	G	28390	29903	N	Q39Q	SNP_silent	Nucleocapsid protein	N:Q39Q	A28390G
EPI_ISL_439334	28390	A	G	28390	29903	N	Q39Q	SNP_silent	Nucleocapsid protein	N:Q39Q	A28390G
EPI_ISL_444480	28390	A	G	28390	29903	N	Q39Q	SNP_silent	Nucleocapsid protein	N:Q39Q	A28390G
EPI_ISL_445980	28390	A	C	28386	29899	N	Q39H	SNP	Nucleocapsid protein	N:Q39H	A28390C
EPI_ISL_446361	28390	A	C	28352	29865	N	Q39H	SNP	Nucleocapsid protein	N:Q39H	A28390C
EPI_ISL_446365	28390	A	C	28389	29902	N	Q39H	SNP	Nucleocapsid protein	N:Q39H	A28390C
EPI_ISL_449309	28390	A	G	28390	29903	N	Q39Q	SNP_silent	Nucleocapsid protein	N:Q39Q	A28390G
EPI_ISL_456984	28390	A	G	28384	29897	N	Q39Q	SNP_silent	Nucleocapsid protein	N:Q39Q	A28390G
EPI_ISL_473932	28390	A	G	28384	29897	N	Q39Q	SNP_silent	Nucleocapsid protein	N:Q39Q	A28390G
EPI_ISL_457878	28391	C	T	28337	29611	N	R40C	SNP	Nucleocapsid protein	N:R40C	C28391T
EPI_ISL_460226	28391	C	T	28372	29859	N	R40C	SNP	Nucleocapsid protein	N:R40C	C28391T
EPI_ISL_460784	28391	C	T	28337	29775	N	R40C	SNP	Nucleocapsid protein	N:R40C	C28391T
EPI_ISL_467986	28391	C	T	28337	29849	N	R40C	SNP	Nucleocapsid protein	N:R40C	C28391T
EPI_ISL_456814	28391	C	T	28337	29611	N	R40C	SNP	Nucleocapsid protein	N:R40C	C28391T
EPI_ISL_456815	28391	C	T	28337	29611	N	R40C	SNP	Nucleocapsid protein	N:R40C	C28391T
EPI_ISL_452519	28391	C	T	28391	29903	N	R40C	SNP	Nucleocapsid protein	N:R40C	C28391T
EPI_ISL_452085	28392	G	A	28392	29903	N	R40H	SNP	Nucleocapsid protein	N:R40H	G28392A
EPI_ISL_429020	28392	G	T	28392	29903	N	R40L	SNP	Nucleocapsid protein	N:R40L	G28392T
EPI_ISL_452737	28392	G	A	28392	29903	N	R40H	SNP	Nucleocapsid protein	N:R40H	G28392A
EPI_ISL_434638	28393	T	C	28393	29903	N	R40R	SNP_silent	Nucleocapsid protein	N:R40R	T28393C
EPI_ISL_456708	28393	T	C	28393	29903	N	R40R	SNP_silent	Nucleocapsid protein	N:R40R	T28393C
EPI_ISL_425914	28394	C	T	28394	29903	N	R41W	SNP	Nucleocapsid protein	N:R41W	C28394T
EPI_ISL_455381	28394	C	A	28393	29902	N	R40R	SNP_silent	Nucleocapsid protein	N:R40R	C28394A
EPI_ISL_431952	28395	G	T	28395	29903	N	R41L	SNP	Nucleocapsid protein	N:R41L	G28395T
EPI_ISL_433121	28395	G	A	28395	29903	N	R41Q	SNP	Nucleocapsid protein	N:R41Q	G28395A
EPI_ISL_433177	28395	G	A	28395	29903	N	R41Q	SNP	Nucleocapsid protein	N:R41Q	G28395A
EPI_ISL_438099	28395	G	T	28395	29874	N	R41L	SNP	Nucleocapsid protein	N:R41L	G28395T
EPI_ISL_438125	28395	G	T	28395	29881	N	R41L	SNP	Nucleocapsid protein	N:R41L	G28395T
EPI_ISL_438126	28395	G	T	28395	29890	N	R41L	SNP	Nucleocapsid protein	N:R41L	G28395T
EPI_ISL_438127	28395	G	T	28395	29899	N	R41L	SNP	Nucleocapsid protein	N:R41L	G28395T
EPI_ISL_438128	28395	G	T	28395	29903	N	R41L	SNP	Nucleocapsid protein	N:R41L	G28395T
EPI_ISL_439350	28395	G	A	28395	29903	N	R41Q	SNP	Nucleocapsid protein	N:R41Q	G28395A
EPI_ISL_462990	28395	G	C	28365	29839	N	R41P	SNP	Nucleocapsid protein	N:R41P	G28395C
EPI_ISL_442518	28396	G	T	28396	29903	N	R41R	SNP_silent	Nucleocapsid protein	N:R41R	G28396T
EPI_ISL_439842	28396	G	A	28396	29903	N	R41R	SNP_silent	Nucleocapsid protein	N:R41R	G28396A
EPI_ISL_420169	28396	G	T	28396	29903	N	R41R	SNP_silent	Nucleocapsid protein	N:R41R	G28396T
EPI_ISL_420205	28396	G	T	28396	29903	N	R41R	SNP_silent	Nucleocapsid protein	N:R41R	G28396T
EPI_ISL_426414	28396	G	A	28396	29903	N	R41R	SNP_silent	Nucleocapsid protein	N:R41R	G28396A
EPI_ISL_426415	28396	G	A	28396	29903	N	R41R	SNP_silent	Nucleocapsid protein	N:R41R	G28396A
EPI_ISL_432540	28396	G	T	28396	29903	N	R41R	SNP_silent	Nucleocapsid protein	N:R41R	G28396T
EPI_ISL_432721	28396	G	T	28396	29903	N	R41R	SNP_silent	Nucleocapsid protein	N:R41R	G28396T
EPI_ISL_433968	28396	G	T	28396	29903	N	R41R	SNP_silent	Nucleocapsid protein	N:R41R	G28396T
EPI_ISL_437559	28396	G	A	28396	29903	N	R41R	SNP_silent	Nucleocapsid protein	N:R41R	G28396A
EPI_ISL_441531	28396	G	T	28396	29903	N	R41R	SNP_silent	Nucleocapsid protein	N:R41R	G28396T
EPI_ISL_442521	28396	G	T	28396	29903	N	R41R	SNP_silent	Nucleocapsid protein	N:R41R	G28396T
EPI_ISL_448472	28396	G	T	28396	29903	N	R41R	SNP_silent	Nucleocapsid protein	N:R41R	G28396T
EPI_ISL_455127	28396	G	A	28342	29775	N	R41R	SNP_silent	Nucleocapsid protein	N:R41R	G28396A
EPI_ISL_472737	28396	G	T	28392	29899	N	R41R	SNP_silent	Nucleocapsid protein	N:R41R	G28396T
EPI_ISL_472767	28396	G	T	28393	29896	N	R41R	SNP_silent	Nucleocapsid protein	N:R41R	G28396T
EPI_ISL_472814	28396	G	T	28392	29899	N	R41R	SNP_silent	Nucleocapsid protein	N:R41R	G28396T
EPI_ISL_472932	28396	G	T	28359	29866	N	R41R	SNP_silent	Nucleocapsid protein	N:R41R	G28396T
EPI_ISL_473128	28396	G	T	28362	29869	N	R41R	SNP_silent	Nucleocapsid protein	N:R41R	G28396T
EPI_ISL_473193	28396	G	T	28366	29873	N	R41R	SNP_silent	Nucleocapsid protein	N:R41R	G28396T
EPI_ISL_473238	28396	G	T	28396	29903	N	R41R	SNP_silent	Nucleocapsid protein	N:R41R	G28396T
EPI_ISL_473267	28396	G	T	28381	29885	N	R41R	SNP_silent	Nucleocapsid protein	N:R41R	G28396T
EPI_ISL_473391	28396	G	T	28396	29903	N	R41R	SNP_silent	Nucleocapsid protein	N:R41R	G28396T
EPI_ISL_473406	28396	G	T	28396	29903	N	R41R	SNP_silent	Nucleocapsid protein	N:R41R	G28396T
EPI_ISL_473408	28396	G	T	28396	29903	N	R41R	SNP_silent	Nucleocapsid protein	N:R41R	G28396T
EPI_ISL_473411	28396	G	T	28396	29903	N	R41R	SNP_silent	Nucleocapsid protein	N:R41R	G28396T
EPI_ISL_473434	28396	G	T	28396	29903	N	R41R	SNP_silent	Nucleocapsid protein	N:R41R	G28396T
EPI_ISL_473482	28396	G	T	28396	29903	N	R41R	SNP_silent	Nucleocapsid protein	N:R41R	G28396T
EPI_ISL_474188	28396	G	T	28360	29867	N	R41R	SNP_silent	Nucleocapsid protein	N:R41R	G28396T
EPI_ISL_443529	28396	G	A	28342	29812	N	R41R	SNP_silent	Nucleocapsid protein	N:R41R	G28396A
EPI_ISL_468814	28396	G	A	28396	29903	N	R41R	SNP_silent	Nucleocapsid protein	N:R41R	G28396A
EPI_ISL_468819	28396	G	A	28396	29903	N	R41R	SNP_silent	Nucleocapsid protein	N:R41R	G28396A
EPI_ISL_427607	28399	C	T	28390	29864	N	P42P	SNP_silent	Nucleocapsid protein	N:P42P	C28399T
EPI_ISL_442560	28399	C	T	28345	29812	N	P42P	SNP_silent	Nucleocapsid protein	N:P42P	C28399T
EPI_ISL_415618	28399	C	A	28321	29825	N	P42P	SNP_silent	Nucleocapsid protein	N:P42P	C28399A
EPI_ISL_440726	28399	C	T	28345	29782	N	P42P	SNP_silent	Nucleocapsid protein	N:P42P	C28399T
EPI_ISL_443713	28399	C	T	28345	29782	N	P42P	SNP_silent	Nucleocapsid protein	N:P42P	C28399T
EPI_ISL_458869	28399	C	T	28348	29785	N	P42P	SNP_silent	Nucleocapsid protein	N:P42P	C28399T
EPI_ISL_451495	28399	C	T	28133	29408	N	P42P	SNP_silent	Nucleocapsid protein	N:P42P	C28399T
EPI_ISL_451565	28399	C	T	28133	29408	N	P42P	SNP_silent	Nucleocapsid protein	N:P42P	C28399T
EPI_ISL_425319	28399	C	T	28396	29900	N	P42P	SNP_silent	Nucleocapsid protein	N:P42P	C28399T
EPI_ISL_441075	28399	C	T	28342	29779	N	P42P	SNP_silent	Nucleocapsid protein	N:P42P	C28399T
EPI_ISL_443974	28399	C	T	28345	29782	N	P42P	SNP_silent	Nucleocapsid protein	N:P42P	C28399T
EPI_ISL_437587	28399	C	T	28399	29903	N	P42P	SNP_silent	Nucleocapsid protein	N:P42P	C28399T
EPI_ISL_415618	28401	AAG	TGC	28323	29825	N	QG43LR	SNP	Nucleocapsid protein	N:QG43LR	AAG28401TGC
EPI_ISL_474146	28404	G	T	28368	29867	N	G44V	SNP	Nucleocapsid protein	N:G44V	G28404T
EPI_ISL_473454	28409	C	T	28409	29903	N	P46S	SNP	Nucleocapsid protein	N:P46S	C28409T
EPI_ISL_473461	28409	C	T	28409	29903	N	P46S	SNP	Nucleocapsid protein	N:P46S	C28409T
EPI_ISL_413607	28409	C	T	28409	29882	N	P46S	SNP	Nucleocapsid protein	N:P46S	C28409T
EPI_ISL_445247	28416	A	T	28370	29796	N	N48I	SNP	Nucleocapsid protein	N:N48I	A28416T
EPI_ISL_453735	28420	T	A	28420	29903	N	T49T	SNP_silent	Nucleocapsid protein	N:T49T	T28420A
EPI_ISL_458683	28422	C	T	28368	29782	N	A50V	SNP	Nucleocapsid protein	N:A50V	C28422T
EPI_ISL_455363	28422	C	A	28419	29900	N	A50E	SNP	Nucleocapsid protein	N:A50E	C28422A
EPI_ISL_420614	28423	G	A	28425	29872	N	A50A	SNP_silent	Nucleocapsid protein	N:A50A	G28423A
EPI_ISL_448893	28423	G	A	28423	29903	N	A50A	SNP_silent	Nucleocapsid protein	N:A50A	G28423A
EPI_ISL_418389	28432	C	T	28434	29811	N	F53F	SNP_silent	Nucleocapsid protein	N:F53F	C28432T
EPI_ISL_422942	28432	C	T	28378	29775	N	F53F	SNP_silent	Nucleocapsid protein	N:F53F	C28432T
EPI_ISL_435407	28432	C	T	28432	29903	N	F53F	SNP_silent	Nucleocapsid protein	N:F53F	C28432T
EPI_ISL_435410	28432	C	T	28432	29903	N	F53F	SNP_silent	Nucleocapsid protein	N:F53F	C28432T
EPI_ISL_450590	28432	C	T	28432	29903	N	F53F	SNP_silent	Nucleocapsid protein	N:F53F	C28432T
EPI_ISL_452798	28432	C	T	28424	29864	N	F53F	SNP_silent	Nucleocapsid protein	N:F53F	C28432T
EPI_ISL_457824	28432	C	T	28423	29903	N	F53F	SNP_silent	Nucleocapsid protein	N:F53F	C28432T
EPI_ISL_458043	28432	C	T	28392	29824	N	F53F	SNP_silent	Nucleocapsid protein	N:F53F	C28432T
EPI_ISL_474199	28432	C	T	28397	29868	N	F53F	SNP_silent	Nucleocapsid protein	N:F53F	C28432T
EPI_ISL_463578	28432	C	T	28432	29903	N	F53F	SNP_silent	Nucleocapsid protein	N:F53F	C28432T
EPI_ISL_430326	28435	C	T	28435	29903	N	T54T	SNP_silent	Nucleocapsid protein	N:T54T	C28435T
EPI_ISL_448241	28435	C	T	28423	29891	N	T54T	SNP_silent	Nucleocapsid protein	N:T54T	C28435T
EPI_ISL_469964	28435	C	T	28381	29782	N	T54T	SNP_silent	Nucleocapsid protein	N:T54T	C28435T
EPI_ISL_463053	28435	C	T	28435	29449	N	T54T	SNP_silent	Nucleocapsid protein	N:T54T	C28435T
EPI_ISL_462828	28435	C	T	28381	29782	N	T54T	SNP_silent	Nucleocapsid protein	N:T54T	C28435T
EPI_ISL_432528	28436	G	T	28436	29903	N	A55S	SNP	Nucleocapsid protein	N:A55S	G28436T
EPI_ISL_432854	28436	G	T	28436	29903	N	A55S	SNP	Nucleocapsid protein	N:A55S	G28436T
EPI_ISL_434000	28436	G	T	28436	29903	N	A55S	SNP	Nucleocapsid protein	N:A55S	G28436T
EPI_ISL_442369	28436	G	T	28436	29903	N	A55S	SNP	Nucleocapsid protein	N:A55S	G28436T
EPI_ISL_443581	28436	G	T	28382	29782	N	A55S	SNP	Nucleocapsid protein	N:A55S	G28436T
EPI_ISL_457315	28436	G	T	28436	29903	N	A55S	SNP	Nucleocapsid protein	N:A55S	G28436T
EPI_ISL_457316	28436	G	T	28436	29903	N	A55S	SNP	Nucleocapsid protein	N:A55S	G28436T
EPI_ISL_458352	28436	G	T	28382	29782	N	A55S	SNP	Nucleocapsid protein	N:A55S	G28436T
EPI_ISL_458358	28436	G	T	28382	29782	N	A55S	SNP	Nucleocapsid protein	N:A55S	G28436T
EPI_ISL_458363	28436	G	T	28382	29782	N	A55S	SNP	Nucleocapsid protein	N:A55S	G28436T
EPI_ISL_458382	28436	G	T	28382	29782	N	A55S	SNP	Nucleocapsid protein	N:A55S	G28436T
EPI_ISL_458814	28436	G	T	28382	29782	N	A55S	SNP	Nucleocapsid protein	N:A55S	G28436T
EPI_ISL_458820	28436	G	T	28373	29773	N	A55S	SNP	Nucleocapsid protein	N:A55S	G28436T
EPI_ISL_458847	28436	G	T	28382	29782	N	A55S	SNP	Nucleocapsid protein	N:A55S	G28436T
EPI_ISL_458911	28436	G	T	28382	29782	N	A55S	SNP	Nucleocapsid protein	N:A55S	G28436T
EPI_ISL_459004	28436	G	T	28382	29782	N	A55S	SNP	Nucleocapsid protein	N:A55S	G28436T
EPI_ISL_469357	28436	G	T	28382	29782	N	A55S	SNP	Nucleocapsid protein	N:A55S	G28436T
EPI_ISL_469416	28436	G	T	28382	29782	N	A55S	SNP	Nucleocapsid protein	N:A55S	G28436T
EPI_ISL_469420	28436	G	T	28382	29782	N	A55S	SNP	Nucleocapsid protein	N:A55S	G28436T
EPI_ISL_469619	28436	G	T	28382	29782	N	A55S	SNP	Nucleocapsid protein	N:A55S	G28436T
EPI_ISL_469656	28436	G	T	28382	29782	N	A55S	SNP	Nucleocapsid protein	N:A55S	G28436T
EPI_ISL_469697	28436	G	T	28382	29782	N	A55S	SNP	Nucleocapsid protein	N:A55S	G28436T
EPI_ISL_469706	28436	G	T	28382	29782	N	A55S	SNP	Nucleocapsid protein	N:A55S	G28436T
EPI_ISL_469713	28436	G	T	28382	29782	N	A55S	SNP	Nucleocapsid protein	N:A55S	G28436T
EPI_ISL_469763	28436	G	T	28382	29782	N	A55S	SNP	Nucleocapsid protein	N:A55S	G28436T
EPI_ISL_469772	28436	G	T	28382	29784	N	A55S	SNP	Nucleocapsid protein	N:A55S	G28436T
EPI_ISL_469841	28436	G	T	28382	29783	N	A55S	SNP	Nucleocapsid protein	N:A55S	G28436T
EPI_ISL_474025	28436	G	T	28427	29894	N	A55S	SNP	Nucleocapsid protein	N:A55S	G28436T
EPI_ISL_456269	28436	G	T	28436	29903	N	A55S	SNP	Nucleocapsid protein	N:A55S	G28436T
EPI_ISL_454957	28441	C	A	28441	29903	N	L56L	SNP_silent	Nucleocapsid protein	N:L56L	C28441A
EPI_ISL_419941	28451	G	C	28421	29873	N	G60R	SNP	Nucleocapsid protein	N:G60R	G28451C
EPI_ISL_439177	28451	G	C	28451	29903	N	G60R	SNP	Nucleocapsid protein	N:G60R	G28451C
EPI_ISL_443857	28451	G	C	28397	29812	N	G60R	SNP	Nucleocapsid protein	N:G60R	G28451C
EPI_ISL_469247	28453	C	T	28429	29879	N	G60G	SNP_silent	Nucleocapsid protein	N:G60G	C28453T
EPI_ISL_430203	28453	C	T	28453	29903	N	G60G	SNP_silent	Nucleocapsid protein	N:G60G	C28453T
EPI_ISL_448650	28455	A	G	28455	29903	N	K61R	SNP	Nucleocapsid protein	N:K61R	A28455G
EPI_ISL_448748	28455	A	G	28455	29903	N	K61R	SNP	Nucleocapsid protein	N:K61R	A28455G
EPI_ISL_433365	28456	G	T	28402	29811	N	K61N	SNP	Nucleocapsid protein	N:K61N	G28456T
EPI_ISL_428782	28456	G	A	28456	29903	N	K61K	SNP_silent	Nucleocapsid protein	N:K61K	G28456A
EPI_ISL_413595	28457	G	A	28192	29409	N	E62K	SNP	Nucleocapsid protein	N:E62K	G28457A
EPI_ISL_413598	28457	G	A	28192	29409	N	E62K	SNP	Nucleocapsid protein	N:E62K	G28457A
EPI_ISL_463381	28458	A	T	28458	29903	N	E62V	SNP	Nucleocapsid protein	N:E62V	A28458T
EPI_ISL_438201	28458	A	T	28458	29903	N	E62V	SNP	Nucleocapsid protein	N:E62V	A28458T
EPI_ISL_443576	28458	A	G	28454	29832	N	E62G	SNP	Nucleocapsid protein	N:E62G	A28458G
EPI_ISL_463329	28458	A	T	28458	29903	N	E62V	SNP	Nucleocapsid protein	N:E62V	A28458T
EPI_ISL_463335	28458	A	T	28458	29903	N	E62V	SNP	Nucleocapsid protein	N:E62V	A28458T
EPI_ISL_463338	28458	A	T	28458	29903	N	E62V	SNP	Nucleocapsid protein	N:E62V	A28458T
EPI_ISL_463339	28458	A	T	28458	29903	N	E62V	SNP	Nucleocapsid protein	N:E62V	A28458T
EPI_ISL_463351	28458	A	T	28458	29903	N	E62V	SNP	Nucleocapsid protein	N:E62V	A28458T
EPI_ISL_463369	28458	A	T	28458	29903	N	E62V	SNP	Nucleocapsid protein	N:E62V	A28458T
EPI_ISL_463370	28458	A	T	28458	29903	N	E62V	SNP	Nucleocapsid protein	N:E62V	A28458T
EPI_ISL_463379	28458	A	T	28458	29903	N	E62V	SNP	Nucleocapsid protein	N:E62V	A28458T
EPI_ISL_463382	28458	A	T	28458	29903	N	E62V	SNP	Nucleocapsid protein	N:E62V	A28458T
EPI_ISL_463383	28458	A	T	28458	29903	N	E62V	SNP	Nucleocapsid protein	N:E62V	A28458T
EPI_ISL_463426	28458	A	T	28458	29903	N	E62V	SNP	Nucleocapsid protein	N:E62V	A28458T
EPI_ISL_463427	28458	A	T	28458	29903	N	E62V	SNP	Nucleocapsid protein	N:E62V	A28458T
EPI_ISL_463428	28458	A	T	28458	29903	N	E62V	SNP	Nucleocapsid protein	N:E62V	A28458T
EPI_ISL_463429	28458	A	T	28458	29903	N	E62V	SNP	Nucleocapsid protein	N:E62V	A28458T
EPI_ISL_463432	28458	A	T	28458	29903	N	E62V	SNP	Nucleocapsid protein	N:E62V	A28458T
EPI_ISL_463538	28458	A	T	28458	29903	N	E62V	SNP	Nucleocapsid protein	N:E62V	A28458T
EPI_ISL_463543	28458	A	T	28458	29903	N	E62V	SNP	Nucleocapsid protein	N:E62V	A28458T
EPI_ISL_463562	28458	A	T	28458	29903	N	E62V	SNP	Nucleocapsid protein	N:E62V	A28458T
EPI_ISL_463563	28458	A	T	28458	29903	N	E62V	SNP	Nucleocapsid protein	N:E62V	A28458T
EPI_ISL_463564	28458	A	T	28458	29903	N	E62V	SNP	Nucleocapsid protein	N:E62V	A28458T
EPI_ISL_463565	28458	A	T	28458	29903	N	E62V	SNP	Nucleocapsid protein	N:E62V	A28458T
EPI_ISL_463566	28458	A	T	28458	29903	N	E62V	SNP	Nucleocapsid protein	N:E62V	A28458T
EPI_ISL_463567	28458	A	T	28458	29903	N	E62V	SNP	Nucleocapsid protein	N:E62V	A28458T
EPI_ISL_463579	28458	A	T	28458	29903	N	E62V	SNP	Nucleocapsid protein	N:E62V	A28458T
EPI_ISL_463580	28458	A	T	28458	29903	N	E62V	SNP	Nucleocapsid protein	N:E62V	A28458T
EPI_ISL_463587	28458	A	T	28458	29903	N	E62V	SNP	Nucleocapsid protein	N:E62V	A28458T
EPI_ISL_463594	28458	A	T	28458	29903	N	E62V	SNP	Nucleocapsid protein	N:E62V	A28458T
EPI_ISL_463595	28458	A	T	28458	29903	N	E62V	SNP	Nucleocapsid protein	N:E62V	A28458T
EPI_ISL_463606	28458	A	T	28458	29903	N	E62V	SNP	Nucleocapsid protein	N:E62V	A28458T
EPI_ISL_463636	28458	A	T	28458	29903	N	E62V	SNP	Nucleocapsid protein	N:E62V	A28458T
EPI_ISL_463637	28458	A	T	28458	29903	N	E62V	SNP	Nucleocapsid protein	N:E62V	A28458T
EPI_ISL_463650	28458	A	T	28458	29903	N	E62V	SNP	Nucleocapsid protein	N:E62V	A28458T
EPI_ISL_463665	28458	A	T	28458	29903	N	E62V	SNP	Nucleocapsid protein	N:E62V	A28458T
EPI_ISL_463682	28458	A	T	28458	29903	N	E62V	SNP	Nucleocapsid protein	N:E62V	A28458T
EPI_ISL_463688	28458	A	T	28458	29903	N	E62V	SNP	Nucleocapsid protein	N:E62V	A28458T
EPI_ISL_463697	28458	A	T	28458	29903	N	E62V	SNP	Nucleocapsid protein	N:E62V	A28458T
EPI_ISL_463703	28458	A	T	28458	29903	N	E62V	SNP	Nucleocapsid protein	N:E62V	A28458T
EPI_ISL_463537	28458	A	T	28458	29903	N	E62V	SNP	Nucleocapsid protein	N:E62V	A28458T
EPI_ISL_463380	28458	A	T	28458	29903	N	E62V	SNP	Nucleocapsid protein	N:E62V	A28458T
EPI_ISL_463639	28458	A	T	28458	29903	N	E62V	SNP	Nucleocapsid protein	N:E62V	A28458T
EPI_ISL_434836	28459	A	G	28459	29903	N	E62E	SNP_silent	Nucleocapsid protein	N:E62E	A28459G
EPI_ISL_453108	28460	G	T	28460	29903	N	D63Y	SNP	Nucleocapsid protein	N:D63Y	G28460T
EPI_ISL_473860	28460	G	T	28460	29903	N	D63Y	SNP	Nucleocapsid protein	N:D63Y	G28460T
EPI_ISL_473871	28460	G	T	28460	29903	N	D63Y	SNP	Nucleocapsid protein	N:D63Y	G28460T
EPI_ISL_473872	28460	G	T	28460	29903	N	D63Y	SNP	Nucleocapsid protein	N:D63Y	G28460T
EPI_ISL_435013	28460	G	A	28460	29903	N	D63N	SNP	Nucleocapsid protein	N:D63N	G28460A
EPI_ISL_426845	28460	G	T	28460	29904	N	D63Y	SNP	Nucleocapsid protein	N:D63Y	G28460T
EPI_ISL_454866	28460	G	A	28460	29903	N	D63N	SNP	Nucleocapsid protein	N:D63N	G28460A
EPI_ISL_444103	28460	G	A	28460	29903	N	D63N	SNP	Nucleocapsid protein	N:D63N	G28460A
EPI_ISL_444112	28460	G	A	28460	29903	N	D63N	SNP	Nucleocapsid protein	N:D63N	G28460A
EPI_ISL_467244	28465	T	C	28465	29903	N	L64L	SNP_silent	Nucleocapsid protein	N:L64L	T28465C
EPI_ISL_424092	28471	C	T	28471	29903	N	F66F	SNP_silent	Nucleocapsid protein	N:F66F	C28471T
EPI_ISL_467083	28471	C	T	28471	29903	N	F66F	SNP_silent	Nucleocapsid protein	N:F66F	C28471T
EPI_ISL_427200	28472	C	T	28442	29842	N	P67S	SNP	Nucleocapsid protein	N:P67S	C28472T
EPI_ISL_419516	28472	C	A	28472	29903	N	P67T	SNP	Nucleocapsid protein	N:P67T	C28472A
EPI_ISL_421434	28472	C	T	28420	29727	N	P67S	SNP	Nucleocapsid protein	N:P67S	C28472T
EPI_ISL_428379	28472	C	A	28472	29903	N	P67T	SNP	Nucleocapsid protein	N:P67T	C28472A
EPI_ISL_435706	28472	C	A	28472	29903	N	P67T	SNP	Nucleocapsid protein	N:P67T	C28472A
EPI_ISL_435707	28472	C	A	28472	29903	N	P67T	SNP	Nucleocapsid protein	N:P67T	C28472A
EPI_ISL_435716	28472	C	A	28472	29903	N	P67T	SNP	Nucleocapsid protein	N:P67T	C28472A
EPI_ISL_436848	28472	C	A	28472	29903	N	P67T	SNP	Nucleocapsid protein	N:P67T	C28472A
EPI_ISL_451799	28472	C	T	28472	29903	N	P67S	SNP	Nucleocapsid protein	N:P67S	C28472T
EPI_ISL_451805	28472	C	T	28472	29903	N	P67S	SNP	Nucleocapsid protein	N:P67S	C28472T
EPI_ISL_458756	28472	C	A	28418	29782	N	P67T	SNP	Nucleocapsid protein	N:P67T	C28472A
EPI_ISL_463149	28472	C	A	28418	29782	N	P67T	SNP	Nucleocapsid protein	N:P67T	C28472A
EPI_ISL_463151	28472	C	A	28418	29782	N	P67T	SNP	Nucleocapsid protein	N:P67T	C28472A
EPI_ISL_463158	28472	C	A	28418	29782	N	P67T	SNP	Nucleocapsid protein	N:P67T	C28472A
EPI_ISL_463162	28472	C	A	28418	29782	N	P67T	SNP	Nucleocapsid protein	N:P67T	C28472A
EPI_ISL_463164	28472	C	A	28418	29782	N	P67T	SNP	Nucleocapsid protein	N:P67T	C28472A
EPI_ISL_463171	28472	C	A	28418	29782	N	P67T	SNP	Nucleocapsid protein	N:P67T	C28472A
EPI_ISL_469182	28472	C	A	28418	29782	N	P67T	SNP	Nucleocapsid protein	N:P67T	C28472A
EPI_ISL_469201	28472	C	A	28418	29782	N	P67T	SNP	Nucleocapsid protein	N:P67T	C28472A
EPI_ISL_474118	28472	C	T	28463	29894	N	P67S	SNP	Nucleocapsid protein	N:P67S	C28472T
EPI_ISL_469205	28472	C	A	28418	29782	N	P67T	SNP	Nucleocapsid protein	N:P67T	C28472A
EPI_ISL_432482	28472	C	T	28469	29900	N	P67S	SNP	Nucleocapsid protein	N:P67S	C28472T
EPI_ISL_451086	28472	C	T	28435	29866	N	P67S	SNP	Nucleocapsid protein	N:P67S	C28472T
EPI_ISL_461248	28473	C	T	28419	29775	N	P67L	SNP	Nucleocapsid protein	N:P67L	C28473T
EPI_ISL_461525	28473	C	T	28473	29903	N	P67L	SNP	Nucleocapsid protein	N:P67L	C28473T
EPI_ISL_470510	28473	C	T	28419	29782	N	P67L	SNP	Nucleocapsid protein	N:P67L	C28473T
EPI_ISL_426678	28476	G	T	28438	29863	N	R68L	SNP	Nucleocapsid protein	N:R68L	G28476T
EPI_ISL_442173	28476	G	A	28422	29849	N	R68Q	SNP	Nucleocapsid protein	N:R68Q	G28476A
EPI_ISL_466203	28476	G	T	28476	29903	N	R68L	SNP	Nucleocapsid protein	N:R68L	G28476T
EPI_ISL_424886	28480	A	T	28480	29882	N	G69G	SNP_silent	Nucleocapsid protein	N:G69G	A28480T
EPI_ISL_424901	28480	A	T	28480	29882	N	G69G	SNP_silent	Nucleocapsid protein	N:G69G	A28480T
EPI_ISL_434804	28480	A	T	28480	29903	N	G69G	SNP_silent	Nucleocapsid protein	N:G69G	A28480T
EPI_ISL_434820	28480	A	T	28480	29903	N	G69G	SNP_silent	Nucleocapsid protein	N:G69G	A28480T
EPI_ISL_457820	28480	A	T	28480	29903	N	G69G	SNP_silent	Nucleocapsid protein	N:G69G	A28480T
EPI_ISL_466582	28481	C	T	28481	29903	N	Q70*	SNP_stop	Nucleocapsid protein	N:Q70*	C28481T
EPI_ISL_450014	28482	A	G	28427	29724	N	Q70R	SNP	Nucleocapsid protein	N:Q70R	A28482G
EPI_ISL_450132	28482	A	G	28427	29724	N	Q70R	SNP	Nucleocapsid protein	N:Q70R	A28482G
EPI_ISL_453550	28483	A	G	28445	29865	N	Q70Q	SNP_silent	Nucleocapsid protein	N:Q70Q	A28483G
EPI_ISL_444637	28483	A	G	28483	29903	N	Q70Q	SNP_silent	Nucleocapsid protein	N:Q70Q	A28483G
EPI_ISL_469964	28486	C	T	28432	29782	N	G71G	SNP_silent	Nucleocapsid protein	N:G71G	C28486T
EPI_ISL_423044	28487	G	A	28487	29903	N	V72I	SNP	Nucleocapsid protein	N:V72I	G28487A
EPI_ISL_429527	28487	G	A	28487	29903	N	V72I	SNP	Nucleocapsid protein	N:V72I	G28487A
EPI_ISL_439459	28487	G	C	28433	29812	N	V72L	SNP	Nucleocapsid protein	N:V72L	G28487C
EPI_ISL_441887	28487	G	C	28487	29903	N	V72L	SNP	Nucleocapsid protein	N:V72L	G28487C
EPI_ISL_441888	28487	G	C	28487	29903	N	V72L	SNP	Nucleocapsid protein	N:V72L	G28487C
EPI_ISL_448412	28487	G	C	28487	29903	N	V72L	SNP	Nucleocapsid protein	N:V72L	G28487C
EPI_ISL_452461	28489	T	C	28489	29903	N	V72V	SNP_silent	Nucleocapsid protein	N:V72V	T28489C
EPI_ISL_452462	28489	T	C	28489	29903	N	V72V	SNP_silent	Nucleocapsid protein	N:V72V	T28489C
EPI_ISL_438610	28492	A	G	28492	29903	N	P73P	SNP_silent	Nucleocapsid protein	N:P73P	A28492G
EPI_ISL_446961	28492	A	T	28492	29903	N	P73P	SNP_silent	Nucleocapsid protein	N:P73P	A28492T
EPI_ISL_468107	28492	A	T	28492	29903	N	P73P	SNP_silent	Nucleocapsid protein	N:P73P	A28492T
EPI_ISL_468114	28492	A	T	28492	29903	N	P73P	SNP_silent	Nucleocapsid protein	N:P73P	A28492T
EPI_ISL_452607	28494	T	.	28490	29899	N	I74	deletion_frameshift	Nucleocapsid protein	N:I74	T28494.
EPI_ISL_470897	28498	C	T	28470	29854	N	N75N	SNP_silent	Nucleocapsid protein	N:N75N	C28498T
EPI_ISL_422251	28500	C	T	28462	29865	N	T76I	SNP	Nucleocapsid protein	N:T76I	C28500T
EPI_ISL_471427	28500	C	T	28500	29903	N	T76I	SNP	Nucleocapsid protein	N:T76I	C28500T
EPI_ISL_471428	28500	C	T	28500	29903	N	T76I	SNP	Nucleocapsid protein	N:T76I	C28500T
EPI_ISL_467346	28500	C	T	28460	29740	N	T76I	SNP	Nucleocapsid protein	N:T76I	C28500T
EPI_ISL_470096	28507	C	T	28453	29782	N	S78S	SNP_silent	Nucleocapsid protein	N:S78S	C28507T
EPI_ISL_425296	28507	C	T	28507	29903	N	S78S	SNP_silent	Nucleocapsid protein	N:S78S	C28507T
EPI_ISL_440340	28507	C	T	28453	29782	N	S78S	SNP_silent	Nucleocapsid protein	N:S78S	C28507T
EPI_ISL_447065	28509	G	C	28509	29903	N	S79T	SNP	Nucleocapsid protein	N:S79T	G28509C
[truncated: 25,287 more rows]
